# Supplementary material for: Transcriptome Profiling of the Hippocampal Seizure Network Implicates a Role for Wnt Signaling during Epileptogenesis in a Mouse Model of Temporal Lobe Epilepsy
Source: Int J Mol Sci. 2022 Oct 10;23(19):12030. doi: 10.3390/ijms231912030 (PMC9569502; doi:10.3390/ijms231912030)
Supplement: Supplementary file 1 [file ijms-23-12030-s001.zip › Supplementary Table S1.xlsx]

## Sheet: 3Up
gene

## Sheet: 3DN
gene

## Sheet: 3<1.5FC
gene

## Sheet: 7Up
gene

## Sheet: 7Up_v_3Up
gene

## Sheet: 7Up_v_3DN
gene

## Sheet: 7Up_v_3<1.5FC
gene

## Sheet: 7DN
gene

## Sheet: 7DN_v_3DN
gene

## Sheet: 7DN_v_3<1.5FC
gene

[truncated: 23 more sheets: 7<1.5FC, 7<1.5FC_v_3Up, 7<1.5FC_v_3DN, 7<1.5FC_v_3<1.5FC, 14Up, 14Up_v_3Up, 14Up_v_3DN, 14Up_v_7Up, 14Up_v_7Up_v_3Up, 14Up_v_7Up_v_3<1.5FC, 14DN_v_3DN, 14DN_v_7DN, 14DN_v_7DN_v_3DN, 14<1.5FC, 14<1.5FC_v_7Up, 14<1.5FC_v_7Up_v_3Up, 14<1.5FC_v_7Up_v_3<1.5FC, 14<1.5FC_v_7DN, 14<1.5FC_v_7DN_v_3DN, 14<1.5FC_v_7DN_v_3<1.5FC …]
