# Supplementary material for: Transcriptome Profiling of the Hippocampal Seizure Network Implicates a Role for Wnt Signaling during Epileptogenesis in a Mouse Model of Temporal Lobe Epilepsy
Source: Int J Mol Sci. 2022 Oct 10;23(19):12030. doi: 10.3390/ijms231912030 (PMC9569502; doi:10.3390/ijms231912030)
Supplement: Supplementary file 1 [file ijms-23-12030-s001.zip › Supplementary Table S2.xlsx]

## Sheet: PIZ_3Up
gene

## Sheet: PIZ_3DN
gene

## Sheet: PIZ_3<1.5FC
gene

## Sheet: PIZ_7Up
gene

## Sheet: PIZ_7Up_v_PIZ_3Up
gene

## Sheet: PIZ_7DN
gene

## Sheet: PIZ_7DN_v_PIZ_3DN
gene

## Sheet: PIZ_7DN_v_PIZ_3<1.5FC
gene

## Sheet: PIZ_7<1.5FC
gene

## Sheet: PIZ_7<1.5FC_v_PIZ_3Up
gene

[truncated: 9 more sheets: PIZ_7<1.5FC_v_PIZ_3DN, PIZ_7<1.5FC_v_PIZ_3<1.5FC, PIZ_14Up_v_PIZ_3Up, PIZ_14Up_v_PIZ_3<1.5FC, PIZ_14Up_v_PIZ_7Up, PIZ_14Up_v_PIZ_7Up_v_PIZ_3Up, PIZ_14DN, PIZ_14DN_v_PIZ_3DN, PIZ_14DN_v_PIZ_7DN_v_PIZ_3DN]
