# Supplementary material for: Transcriptome Profiling of the Hippocampal Seizure Network Implicates a Role for Wnt Signaling during Epileptogenesis in a Mouse Model of Temporal Lobe Epilepsy
Source: Int J Mol Sci. 2022 Oct 10;23(19):12030. doi: 10.3390/ijms231912030 (PMC9569502; doi:10.3390/ijms231912030)
Supplement: Supplementary file 1 [file ijms-23-12030-s001.zip › Supplementary Table S3.xlsx]

## Sheet: EZ_3Up
gene	MGI_ID	GeneSymbol	Description	EZ_3_log2FoldChange	EZ_3_pvalue	EZ_3_padj	PIZ_3_log2FoldChange	PIZ_3_pvalue	PIZ_3_padj
ENSMUSG00000000001.5	MGI:95773	Gnai3	guanine nucleotide binding protein (G protein), alpha inhibiting 3	0.604872	5.17187e-09	1.05202e-07	0.227428	0.0293735	0.100109
ENSMUSG00000000028.16	MGI:1338073	Cdc45	cell division cycle 45	1.71411	1.89093e-12	1.24314e-10	0.821274	0.00144484	0.0101774
ENSMUSG00000000078.8	MGI:1346318	Klf6	Kruppel-like factor 6	0.805745	9.60805e-08	1.31858e-06	0.335736	0.0267805	0.0935664
ENSMUSG00000000093.7	MGI:98494	Tbx2	T-box 2	0.816995	0.00213147	0.00764586	0.370301	0.17479	0.352448
ENSMUSG00000000120.7	MGI:97323	Ngfr	nerve growth factor receptor (TNFR superfamily, member 16)	2.05851	1.41108e-05	9.67783e-05	1.23905	0.0103614	0.0463007
ENSMUSG00000000204.17	MGI:1329010	Slfn4	schlafen 4	4.15572	1.32718e-10	4.54892e-09	1.43801	0.0496752	0.145759
ENSMUSG00000000263.16	MGI:95747	Glra1	glycine receptor, alpha 1 subunit	7.10935	3.8848e-06	3.17406e-05	1.73828	0.175627	0.353503
ENSMUSG00000000278.11	MGI:1921867	Scpep1	serine carboxypeptidase 1	1.54789	8.39466e-08	1.178e-06	0.629968	0.0304073	0.102686
ENSMUSG00000000305.13	MGI:99218	Cdh4	cadherin 4	1.12256	0.000467633	0.00205587	-0.113424	0.72406	0.84631
ENSMUSG00000000489.8	MGI:97528	Pdgfb	platelet derived growth factor, B polypeptide	1.02681	1.21103e-07	1.60806e-06	0.0375513	0.847344	0.920224
ENSMUSG00000000530.17	MGI:1338946	Acvrl1	activin A receptor, type II-like 1	0.81757	0.000711283	0.00294836	0.0190121	0.93765	0.970236
ENSMUSG00000000579.15	MGI:3807476	Dynlt1c	dynein light chain Tctex-type 1C	0.935752	6.31663e-05	0.000358819	0.629065	0.00790726	0.0376134
ENSMUSG00000000693.11	MGI:1337004	Loxl3	lysyl oxidase-like 3	2.10134	1.70967e-07	2.15735e-06	1.26643	0.00176961	0.0119302
ENSMUSG00000000782.17	MGI:98507	Tcf7	transcription factor 7, T cell specific	1.09977	8.10914e-05	0.000445061	0.179012	0.530236	0.711351
ENSMUSG00000000901.18	MGI:97008	Mmp11	matrix metallopeptidase 11	2.31624	1.1471e-09	2.9043e-08	0.901664	0.0215557	0.0801826
ENSMUSG00000000957.12	MGI:101900	Mmp14	matrix metallopeptidase 14 (membrane-inserted)	1.56695	6.68021e-08	9.65585e-07	0.643968	0.0273274	0.0949252
ENSMUSG00000001119.8	MGI:88459	Col6a1	collagen, type VI, alpha 1	1.98127	0.000650708	0.00273196	1.07994	0.0622916	0.171588
ENSMUSG00000001247.17	MGI:1927471	Lsr	lipolysis stimulated lipoprotein receptor	0.866519	0.000760986	0.00312322	0.266686	0.305291	0.508558
ENSMUSG00000001281.11	MGI:96616	Itgb7	integrin beta 7	1.83279	4.50622e-05	0.000266294	0.251025	0.61535	0.773985
ENSMUSG00000001288.16	MGI:97858	Rarg	retinoic acid receptor, gamma	0.596706	0.000289511	0.00135145	0.470203	0.00530574	0.0278688
ENSMUSG00000001348.16	MGI:87883	Acp5	acid phosphatase 5, tartrate resistant	4.20731	7.3195e-08	1.04695e-06	0.55235	0.492374	0.682043
ENSMUSG00000001349.6	MGI:104979	Cnn1	calponin 1	3.62732	6.24904e-06	4.78761e-05	0.651214	0.422091	0.622735
ENSMUSG00000001418.14	MGI:1913318	Glmp	glycosylated lysosomal membrane protein	1.11212	4.00226e-08	6.21064e-07	0.534394	0.00861843	0.0402386
ENSMUSG00000001435.16	MGI:88451	Col18a1	collagen, type XVIII, alpha 1	3.10057	2.0826e-08	3.5403e-07	1.29451	0.0195975	0.0748085
ENSMUSG00000001493.10	MGI:103220	Meox1	mesenchyme homeobox 1	1.39924	7.71146e-07	7.86015e-06	0.409261	0.154857	0.324862
ENSMUSG00000001506.11	MGI:88467	Col1a1	collagen, type I, alpha 1	2.19747	1.17634e-05	8.25718e-05	1.24543	0.0134776	0.0564781
ENSMUSG00000001525.11	MGI:107812	Tubb5	tubulin, beta 5 class I	0.758268	1.95686e-12	1.27755e-10	0.249964	0.0203992	0.0769643
ENSMUSG00000001542.8	MGI:2183438	Ell2	elongation factor for RNA polymerase II 2	0.803618	2.11829e-05	0.000138327	-0.239314	0.208618	0.395878
ENSMUSG00000001604.15	MGI:1196908	Tcea3	transcription elongation factor A (SII), 3	3.50222	1.83507e-05	0.000121956	0.539365	0.503938	0.691118
ENSMUSG00000001642.19	MGI:1353494	Akr1b3	aldo-keto reductase family 1, member B3 (aldose reductase)	0.634859	1.71119e-05	0.000114946	0.0140097	0.925029	0.963587
ENSMUSG00000001663.11	MGI:107379	Gstt1	glutathione S-transferase, theta 1	0.710978	0.000588116	0.00250756	0.557366	0.00672093	0.0333486
ENSMUSG00000001918.18	MGI:105305	Slc1a5	solute carrier family 1 (neutral amino acid transporter), member 5	1.58846	1.85375e-06	1.67632e-05	0.970048	0.00505049	0.0268804
ENSMUSG00000001946.15	MGI:1916774	Esam	endothelial cell-specific adhesion molecule	0.884184	2.72619e-06	2.34333e-05	0.158902	0.402344	0.604547
ENSMUSG00000001948.11	MGI:1333778	Spa17	sperm autoantigenic protein 17	1.18199	1.40355e-07	1.82309e-06	0.726549	0.00155086	0.0107509
ENSMUSG00000002014.13	MGI:1099464	Ssr4	signal sequence receptor, delta	0.740857	3.26868e-07	3.74855e-06	0.321019	0.0276905	0.0959356
ENSMUSG00000002108.11	MGI:1352462	Nr1h3	nuclear receptor subfamily 1, group H, member 3	0.739479	0.00192254	0.00699059	0.73314	0.00295545	0.0177697
ENSMUSG00000002147.19	MGI:103034	Stat6	signal transducer and activator of transcription 6	1.56993	4.96217e-07	5.3568e-06	0.95378	0.00245611	0.0154292
ENSMUSG00000002204.10	MGI:109365	Napsa	napsin A aspartic peptidase	4.76958	1.71291e-06	1.56717e-05	-0.933502	0.35594	0.559218
ENSMUSG00000002228.8	MGI:1919137	Ppm1j	protein phosphatase 1J	4.00994	1.03647e-09	2.66355e-08	1.8822	0.00208331	0.0135145
ENSMUSG00000002257.9	MGI:1346328	Def6	differentially expressed in FDCP 6	1.80768	7.52626e-07	7.70324e-06	0.879001	0.0188733	0.0728187
ENSMUSG00000002289.17	MGI:1888999	Angptl4	angiopoietin-like 4	2.31311	1.08204e-08	2.00064e-07	0.446068	0.285309	0.48743
ENSMUSG00000002365.11	MGI:1913866	Snx9	sorting nexin 9	0.834641	1.01561e-07	1.37793e-06	0.140021	0.378965	0.581818
ENSMUSG00000002804.5	MGI:1913424	Nudt14	nudix (nucleoside diphosphate linked moiety X)-type motif 14	0.790541	6.92885e-05	0.000389003	0.459432	0.0214174	0.0797916
ENSMUSG00000002812.5	MGI:1342286	Flii	flightless I actin binding protein	0.588059	0.000221785	0.00106878	0.283065	0.0761787	0.197676
ENSMUSG00000002847.8	MGI:1934677	Pla1a	phospholipase A1 member A	1.65166	5.61481e-06	4.37629e-05	0.128592	0.729687	0.849429
ENSMUSG00000002885.15	MGI:1347095	Adgre5	adhesion G protein-coupled receptor E5	0.869014	2.80962e-06	2.40449e-05	0.217839	0.244039	0.440032
ENSMUSG00000002944.16	MGI:107899	Cd36	CD36 molecule	2.45083	3.50666e-05	0.000214244	-0.464149	0.453452	0.649454
ENSMUSG00000002983.18	MGI:103289	Relb	avian reticuloendotheliosis viral (v-rel) oncogene related B	1.16507	1.41354e-05	9.68983e-05	0.142142	0.601972	0.764179
ENSMUSG00000003123.16	MGI:96790	Lipe	lipase, hormone sensitive	0.66452	0.00103579	0.00407774	0.489668	0.0164399	0.0655982
ENSMUSG00000003134.11	MGI:1927225	Tbc1d8	TBC1 domain family, member 8	0.886767	6.90079e-07	7.1647e-06	0.369578	0.0409299	0.127106
ENSMUSG00000003206.8	MGI:1354171	Ebi3	Epstein-Barr virus induced gene 3	1.53335	0.000443608	0.00196316	0.88662	0.0552521	0.157626
ENSMUSG00000003348.11	MGI:3050117	Mob3a	MOB kinase activator 3A	1.26402	2.16926e-08	3.66038e-07	0.577354	0.0113093	0.0494969
ENSMUSG00000003382.19	MGI:1350926	Etv3	ets variant 3	0.792597	0.00129122	0.00494279	0.138585	0.574561	0.745763
ENSMUSG00000003541.7	MGI:104814	Ier3	immediate early response 3	2.33419	1.15547e-13	1.16055e-11	0.385032	0.225774	0.416916
ENSMUSG00000003545.4	MGI:95575	Fosb	FBJ osteosarcoma oncogene B	2.12296	6.48323e-09	1.27892e-07	0.189843	0.606734	0.767548
ENSMUSG00000003617.17	MGI:88476	Cp	ceruloplasmin	1.49818	3.32928e-06	2.77746e-05	0.453254	0.161215	0.333538
ENSMUSG00000003814.9	MGI:88252	Calr	calreticulin	0.725497	0.000133009	0.000682342	0.13054	0.491921	0.681819
ENSMUSG00000004044.10	MGI:1277968	Cavin1	caveolae associated 1	1.56839	4.68858e-09	9.65896e-08	0.760413	0.00472245	0.0255015
ENSMUSG00000004054.10	MGI:1346880	Map3k11	mitogen-activated protein kinase kinase kinase 11	0.595117	0.000194667	0.000955051	0.480028	0.00287655	0.0174326
ENSMUSG00000004099.17	MGI:94912	Dnmt1	DNA methyltransferase (cytosine-5) 1	0.693036	1.04868e-17	3.54997e-15	0.207882	0.011233	0.0492706
ENSMUSG00000004105.9	MGI:1347002	Angptl2	angiopoietin-like 2	3.19	6.96953e-12	3.81446e-10	0.765788	0.101556	0.241782
ENSMUSG00000004317.15	MGI:99486	Clcn5	chloride channel, voltage-sensitive 5	0.650223	1.95077e-05	0.000128613	0.195769	0.203848	0.390055
ENSMUSG00000004371.16	MGI:107613	Il11	interleukin 11	2.58041	1.37248e-07	1.78696e-06	0.63144	0.223035	0.413478
ENSMUSG00000004451.15	MGI:1927244	Ralb	v-ral simian leukemia viral oncogene B	0.856894	4.42083e-05	0.000262209	0.553998	0.00887761	0.0411227
ENSMUSG00000004508.7	MGI:1333854	Gab2	growth factor receptor bound protein 2-associated protein 2	0.768657	0.000517524	0.00224676	0.275515	0.214718	0.403389
ENSMUSG00000004552.17	MGI:107361	Ctse	cathepsin E	3.59248	0.000238307	0.00113661	2.92946	0.00822847	0.0387731
ENSMUSG00000004655.6	MGI:103201	Aqp1	aquaporin 1	1.7757	0.000911678	0.00364937	1.40177	0.010981	0.0483859
ENSMUSG00000004665.11	MGI:105093	Cnn2	calponin 2	1.59294	2.43909e-07	2.93204e-06	0.568413	0.0694269	0.18562
ENSMUSG00000004837.3	MGI:1918770	Grap	GRB2-related adaptor protein	1.28143	4.88095e-06	3.87593e-05	0.624053	0.0278763	0.0963863
ENSMUSG00000005043.14	MGI:1350341	Sgsh	N-sulfoglucosamine sulfohydrolase (sulfamidase)	0.994863	0.000161441	0.000810013	0.0723585	0.784742	0.884615
ENSMUSG00000005054.8	MGI:109514	Cstb	cystatin B	1.38444	2.12791e-11	9.53389e-10	0.331787	0.112581	0.259759
ENSMUSG00000005057.14	MGI:1345171	Sh2b2	SH2B adaptor protein 2	1.59505	4.76974e-07	5.17351e-06	0.815238	0.0112752	0.0494016
ENSMUSG00000005131.5	MGI:1922561	4930550C14Rik	RIKEN cDNA 4930550C14 gene	1.32424	0.00212286	0.00761894	0.610777	0.176403	0.354492
ENSMUSG00000005397.9	MGI:97342	Nid1	nidogen 1	1.65029	2.92146e-06	2.48624e-05	0.753239	0.0336531	0.110257
ENSMUSG00000005481.19	MGI:1915528	Ddx39a	DEAD box helicase 39a	0.845573	2.99363e-13	2.6394e-11	0.220117	0.0654911	0.177866
ENSMUSG00000005667.9	MGI:1338850	Mthfd2	methylenetetrahydrofolate dehydrogenase (NAD+ dependent), methenyltetrahydrofolate cyclohydrolase	0.80122	0.000421773	0.00187927	-0.470839	0.0437831	0.13334
ENSMUSG00000005800.4	MGI:1202395	Mmp8	matrix metallopeptidase 8	6.1855	0.000337439	0.00154544	0.359293	0.853198	0.923671
ENSMUSG00000005824.8	MGI:1355317	Tnfsf14	tumor necrosis factor (ligand) superfamily, member 14	5.22889	0.000920848	0.0036809	1.26914	0.408761
ENSMUSG00000005892.5	MGI:98823	Trh	thyrotropin releasing hormone	5.54533	4.8792e-07	5.27762e-06	2.97724	0.0057055	0.0295044
ENSMUSG00000005947.12	MGI:1298377	Itgae	integrin alpha E, epithelial-associated	2.48779	1.40365e-05	9.63409e-05	0.643683	0.27223	0.471961
ENSMUSG00000005950.15	MGI:2137026	P2rx5	purinergic receptor P2X, ligand-gated ion channel, 5	3.04924	2.20522e-08	3.70969e-07	0.704809	0.188345	0.369542
ENSMUSG00000005952.16	MGI:1341787	Trpv1	transient receptor potential cation channel, subfamily V, member 1	2.83916	0.000197702	0.000968205	1.95718	0.0148019	0.060478
ENSMUSG00000005973.7	MGI:104559	Rcn1	reticulocalbin 1	1.17531	1.90976e-07	2.37702e-06	0.349325	0.123932	0.277601
ENSMUSG00000005983.16	MGI:1920511	1700037C18Rik	RIKEN cDNA 1700037C18 gene	1.13685	1.37191e-05	9.43748e-05	0.653011	0.0141475	0.0585084
ENSMUSG00000006301.18	MGI:1916910	Tmbim1	transmembrane BAX inhibitor motif containing 1	0.991475	9.69817e-06	7.01646e-05	0.445252	0.0477006	0.141315
ENSMUSG00000006344.18	MGI:1346063	Ggt5	gamma-glutamyltransferase 5	0.919569	0.00267595	0.00930087	0.796142	0.010489	0.0467148
ENSMUSG00000006360.12	MGI:88501	Crip1	cysteine-rich protein 1 (intestinal)	1.19014	0.000119496	0.000620915	0.339755	0.279068	0.479904
ENSMUSG00000006390.16	MGI:1858959	Elovl1	elongation of very long chain fatty acids (FEN1/Elo2, SUR4/Elo3, yeast)-like 1	1.04275	1.69077e-07	2.13547e-06	0.619087	0.00212972	0.0137414
ENSMUSG00000006445.4	MGI:95278	Epha2	Eph receptor A2	2.20637	6.54051e-09	1.28929e-07	0.827544	0.0338354	0.110762
ENSMUSG00000006457.5	MGI:99678	Actn3	actinin alpha 3	1.66159	8.49621e-05	0.000463706	-0.178202	0.692484	0.827259
ENSMUSG00000006589.9	MGI:88061	Aprt	adenine phosphoribosyl transferase	0.811653	9.46845e-13	7.01689e-11	0.216684	0.0596986	0.166498
ENSMUSG00000006678.7	MGI:99660	Pola1	polymerase (DNA directed), alpha 1	1.07565	5.59553e-09	1.12733e-07	0.288493	0.124978	0.279278
ENSMUSG00000006736.10	MGI:1914375	Tspan31	tetraspanin 31	0.59108	5.66406e-07	6.01505e-06	0.181247	0.127161	0.282562
ENSMUSG00000007122.12	MGI:1309468	Casq1	calsequestrin 1	2.98587	3.63019e-07	4.09292e-06	1.15483	0.0660092	0.178814
ENSMUSG00000007379.16	MGI:3036254	Dennd2c	DENN/MADD domain containing 2C	2.57131	2.70973e-06	2.33064e-05	0.213537	0.700762	0.831941
ENSMUSG00000007589.10	MGI:107246	Tinf2	Terf1 (TRF1)-interacting nuclear factor 2	0.978901	8.88959e-13	6.71495e-11	0.444021	0.00151379	0.0105739
ENSMUSG00000007646.14	MGI:2150020	Rad51c	RAD51 paralog C	0.754912	0.00025088	0.00118996	0.0363148	0.860963	0.928471
ENSMUSG00000007815.14	MGI:1096342	Rhoa	ras homolog family member A	0.738565	9.202e-09	1.73415e-07	0.403475	0.00174118	0.0117882
ENSMUSG00000008999.8	MGI:103302	Bmp7	bone morphogenetic protein 7	1.45555	6.39577e-05	0.000362489	0.626568	0.0889128	0.220662
ENSMUSG00000009281.7	MGI:1918910	Rarres2	retinoic acid receptor responder (tazarotene induced) 2	1.05637	0.000634585	0.00267409	0.989333	0.00185543	0.0123841
ENSMUSG00000009545.15	MGI:108083	Kcnq1	potassium voltage-gated channel, subfamily Q, member 1	1.38223	0.00167051	0.00618741	0.731173	0.117709	0.267673
ENSMUSG00000009687.15	MGI:1201785	Fxyd5	FXYD domain-containing ion transport regulator 5	2.37705	3.85728e-11	1.58809e-09	0.84027	0.0203104	0.0767136
ENSMUSG00000009772.16	MGI:1921387	Nuak2	NUAK family, SNF1-like kinase, 2	1.98317	3.5891e-07	4.0566e-06	0.837598	0.0356932	0.115352
ENSMUSG00000010047.13	MGI:1196334	Hyal2	hyaluronoglucosaminidase 2	0.872266	5.37198e-10	1.50767e-08	0.441204	0.00232699	0.0147632
ENSMUSG00000010095.14	MGI:96955	Slc3a2	solute carrier family 3 (activators of dibasic and neutral amino acid transport), member 2	0.588782	1.21712e-05	8.50062e-05	0.0216181	0.872708	0.935305
ENSMUSG00000010307.8	MGI:1915143	Tmem86a	transmembrane protein 86A	1.60341	4.68805e-07	5.09094e-06	0.988787	0.00200189	0.0131388
ENSMUSG00000010311.16	MGI:2151113	Optc	opticin	2.1189	0.00165376	0.00613115	1.22425	0.0659561	0.17872
ENSMUSG00000010406.13	MGI:1916086	Mrpl52	mitochondrial ribosomal protein L52	0.631483	3.8411e-05	0.000231683	0.264549	0.0876873	0.218455
ENSMUSG00000010751.16	MGI:1930270	Tnfrsf22	tumor necrosis factor receptor superfamily, member 22	1.20906	1.50556e-07	1.93361e-06	0.0275316	0.911887	0.956737
ENSMUSG00000010830.9	MGI:2145953	Kdelr3	KDEL (Lys-Asp-Glu-Leu) endoplasmic reticulum protein retention receptor 3	1.73251	0.000634307	0.00267333	1.45877	0.00800349	0.0379286
ENSMUSG00000011148.15	MGI:87947	Adssl1	adenylosuccinate synthetase like 1	2.22867	6.4859e-10	1.76959e-08	1.01934	0.00517896	0.0273884
ENSMUSG00000011179.9	MGI:97402	Odc1	ornithine decarboxylase, structural 1	1.58491	6.10762e-19	3.48898e-16	0.481786	0.00709469	0.0347008
ENSMUSG00000011256.17	MGI:105377	Adam19	a disintegrin and metallopeptidase domain 19 (meltrin beta)	1.60453	2.24838e-07	2.72839e-06	-0.14793	0.634403	0.7882
ENSMUSG00000011257.20	MGI:2385206	Pabpc4	poly(A) binding protein, cytoplasmic 4	0.604565	2.82098e-09	6.27852e-08	0.0816701	0.428633	0.628421
ENSMUSG00000012519.15	MGI:1921818	Mlkl	mixed lineage kinase domain-like	2.63679	5.97649e-06	4.61751e-05	0.958632	0.115923	0.265141
ENSMUSG00000013089.16	MGI:1096867	Etv5	ets variant 5	0.864018	0.001174	0.00456029	-0.788404	0.00312517	0.018559
ENSMUSG00000013584.6	MGI:107928	Aldh1a2	aldehyde dehydrogenase family 1, subfamily A2	1.62478	0.00143499	0.00540783	0.597228	0.245899	0.442423
ENSMUSG00000014158.13	MGI:1926945	Trpv4	transient receptor potential cation channel, subfamily V, member 4	1.1561	0.00184031	0.00673266	0.686864	0.0710603	0.188582
ENSMUSG00000014329.15	MGI:1933388	Bicc1	BicC family RNA binding protein 1	0.878353	0.000397979	0.00178514	0.48285	0.0532544	0.153346
ENSMUSG00000014444.18	MGI:3603204	Piezo1	piezo-type mechanosensitive ion channel component 1	2.16357	5.97988e-11	2.32001e-09	1.00743	0.00252009	0.0157487
ENSMUSG00000014599.11	MGI:1339753	Csf1	colony stimulating factor 1 (macrophage)	1.47447	2.72785e-11	1.16871e-09	0.677331	0.00229856	0.0146151
ENSMUSG00000014791.11	MGI:2679007	Elmo3	engulfment and cell motility 3	1.44064	8.94253e-06	6.54576e-05	0.937805	0.00593683	0.0303999
ENSMUSG00000014867.10	MGI:98445	Surf4	surfeit gene 4	0.628066	4.05664e-07	4.49608e-06	0.0971329	0.434809	0.633341
ENSMUSG00000015027.12	MGI:1355303	Galns	galactosamine (N-acetyl)-6-sulfate sulfatase	1.18115	5.92324e-10	1.63656e-08	0.431016	0.0255883	0.0904925
ENSMUSG00000015112.16	MGI:1354721	Slc25a13	solute carrier family 25 (mitochondrial carrier, adenine nucleotide translocator), member 13	1.0728	0.000250205	0.00118737	0.482781	0.11682	0.266382
ENSMUSG00000015133.18	MGI:2142227	Lrrk1	leucine-rich repeat kinase 1	1.95862	1.87297e-07	2.33652e-06	1.07017	0.00476621	0.0256399
ENSMUSG00000015134.16	MGI:1861722	Aldh1a3	aldehyde dehydrogenase family 1, subfamily A3	1.87279	0.00172529	0.00636537	-0.0407401	0.949017	0.97614
ENSMUSG00000015217.12	MGI:1098219	Hmgb3	high mobility group box 3	0.595441	0.00277319	0.00958901	0.247994	0.214924	0.403511
ENSMUSG00000015247.11	MGI:1913786	Nipsnap3b	nipsnap homolog 3B	0.657711	5.85648e-05	0.00033518	0.362497	0.0282263	0.0973444
ENSMUSG00000015312.10	MGI:107776	Gadd45b	growth arrest and DNA-damage-inducible 45 beta	2.05661	2.19336e-11	9.79337e-10	0.341609	0.269317	0.46877
ENSMUSG00000015340.11	MGI:88574	Cybb	cytochrome b-245, beta polypeptide	4.5996	5.71818e-12	3.21956e-10	1.55261	0.0229734	0.0838085
ENSMUSG00000015468.15	MGI:107471	Notch4	notch 4	1.5018	2.49181e-11	1.08956e-09	0.477987	0.0367844	0.117951
ENSMUSG00000015575.16	MGI:1328318	Atp6v0e	ATPase, H+ transporting, lysosomal V0 subunit E	0.850777	6.57325e-07	6.87671e-06	0.51606	0.00272792	0.0167216
ENSMUSG00000015652.10	MGI:1917608	Steap1	six transmembrane epithelial antigen of the prostate 1	2.85387	4.75203e-05	0.000279016	2.21162	0.00805119	0.0381246
ENSMUSG00000015702.14	MGI:1923711	Anxa9	annexin A9	1.03725	0.000513815	0.00223171	0.474174	0.110261	0.256105
ENSMUSG00000015714.12	MGI:1924143	Cers2	ceramide synthase 2	0.759841	5.89693e-06	4.56633e-05	0.350522	0.0372131	0.118873
ENSMUSG00000015854.8	MGI:1334419	Cd5l	CD5 antigen-like	7.20339	3.76601e-07	4.22175e-06	3.54119	0.0306247	0.103246
ENSMUSG00000015943.12	MGI:1916418	Bola1	bolA-like 1 (E. coli)	0.704461	0.000680717	0.00284012	0.637056	0.00266891	0.0164479
ENSMUSG00000015980.15	MGI:1923862	Lrrc27	leucine rich repeat containing 27	0.744108	0.000688379	0.00286685	-0.0304651	0.889416	0.944885
ENSMUSG00000016087.14	MGI:95554	Fli1	Friend leukemia integration 1	1.43383	1.60983e-05	0.000108749	0.961145	0.00430794	0.0238085
ENSMUSG00000016487.16	MGI:1914783	Ppfibp1	PTPRF interacting protein, binding protein 1 (liprin beta 1)	0.678183	0.000154387	0.000778467	-0.105784	0.557	0.732068
ENSMUSG00000016520.8	MGI:2155959	Lnx2	ligand of numb-protein X 2	0.722166	1.15938e-05	8.14719e-05	0.384695	0.0235715	0.085351
ENSMUSG00000016526.9	MGI:1330300	Dyrk3	dual-specificity tyrosine-(Y)-phosphorylation regulated kinase 3	0.9924	1.94297e-05	0.00012816	0.106248	0.648687	0.797549
ENSMUSG00000016528.11	MGI:109298	Mapkapk2	MAP kinase-activated protein kinase 2	1.54251	2.77537e-13	2.47885e-11	0.571189	0.00704354	0.0345086
ENSMUSG00000016559.15	MGI:1101768	H3f3b	H3.3 histone B	0.625974	5.97438e-10	1.64806e-08	0.232849	0.0215873	0.0802755
ENSMUSG00000016624.16	MGI:2443812	Phf21b	PHD finger protein 21B	0.901327	0.00015212	0.000768776	0.290401	0.229409	0.421847
ENSMUSG00000016757.12	MGI:3039573	Ttll12	tubulin tyrosine ligase-like family, member 12	0.642077	3.2564e-07	3.73993e-06	0.264207	0.0388651	0.122635
ENSMUSG00000016995.18	MGI:1328314	Matn4	matrilin 4	1.32554	0.000782374	0.0031976	0.459852	0.245363	0.441723
ENSMUSG00000017144.9	MGI:1921444	Rnd3	Rho family GTPase 3	0.74553	8.30504e-06	6.14143e-05	0.309787	0.0651034	0.177093
ENSMUSG00000017300.10	MGI:98780	Tnnc2	troponin C2, fast	4.6114	0.000952099	0.00379235	-1.03197	0.501037
ENSMUSG00000017466.10	MGI:98753	Timp2	tissue inhibitor of metalloproteinase 2	1.67889	5.70737e-05	0.000327809	0.183509	0.659961	0.805305
ENSMUSG00000017652.17	MGI:88336	Cd40	CD40 antigen	1.69898	9.30268e-05	0.000501434	-0.0117109	0.980204	0.991424
ENSMUSG00000017697.4	MGI:87916	Ada	adenosine deaminase	2.91784	5.91535e-10	1.63656e-08	1.50425	0.00184812	0.0123487
ENSMUSG00000017718.16	MGI:2448704	Afmid	arylformamidase	0.904834	0.00272772	0.00945206	0.0641004	0.832097	0.91203
ENSMUSG00000017724.15	MGI:99423	Etv4	ets variant 4	1.00843	1.20647e-06	1.16091e-05	-0.600686	0.00426779	0.023641
ENSMUSG00000017756.10	MGI:1342283	Slc12a7	solute carrier family 12, member 7	1.70534	1.01293e-08	1.88686e-07	0.837586	0.0052209	0.0275551
ENSMUSG00000017760.17	MGI:97748	Ctsa	cathepsin A	1.26233	8.14484e-06	6.04088e-05	0.838971	0.00305596	0.0182213
ENSMUSG00000017774.20	MGI:106612	Myo1c	myosin IC	1.28267	2.96453e-08	4.8099e-07	0.131914	0.570277	0.742685
ENSMUSG00000017861.12	MGI:101785	Mybl2	myeloblastosis oncogene-like 2	1.6621	1.64427e-09	3.92734e-08	0.610849	0.0428693	0.131306
ENSMUSG00000017929.14	MGI:1927169	B4galt5	UDP-Gal:betaGlcNAc beta 1,4-galactosyltransferase, polypeptide 5	0.747274	2.75015e-08	4.50203e-07	0.332049	0.013982	0.0580254
ENSMUSG00000018008.9	MGI:2441702	Cyth4	cytohesin 4	1.04344	0.00171594	0.00633683	0.839824	0.0117854	0.051014
ENSMUSG00000018143.11	MGI:99951	Mafk	v-maf musculoaponeurotic fibrosarcoma oncogene family, protein K (avian)	0.793214	0.0012924	0.00494596	-0.0677804	0.785898	0.885252
ENSMUSG00000018169.13	MGI:1095404	Mfng	MFNG O-fucosylpeptide 3-beta-N-acetylglucosaminyltransferase	0.928177	0.0019874	0.00718926	0.734562	0.0157329	0.0634976
ENSMUSG00000018217.13	MGI:97631	Pmp22	peripheral myelin protein 22	1.39759	6.39376e-07	6.70428e-06	0.820807	0.00363068	0.0207131
ENSMUSG00000018293.5	MGI:97549	Pfn1	profilin 1	0.606638	0.000109897	0.00057772	0.215824	0.16969	0.345225
ENSMUSG00000018339.13	MGI:105102	Gpx3	glutathione peroxidase 3	3.51792	8.11382e-10	2.13718e-08	1.2841	0.0254401	0.0901955
ENSMUSG00000018362.15	MGI:103561	Kpna2	karyopherin (importin) alpha 2	1.38004	1.92853e-11	8.78601e-10	0.43212	0.0375249	0.119595
ENSMUSG00000018377.11	MGI:1313291	Vezf1	vascular endothelial zinc finger 1	0.802113	1.24978e-09	3.11673e-08	0.288878	0.0298893	0.101278
ENSMUSG00000018405.8	MGI:2443470	Mrm1	mitochondrial rRNA methyltransferase 1	0.659662	1.06133e-05	7.551e-05	0.288924	0.0520469	0.150791
ENSMUSG00000018585.10	MGI:1333855	Atox1	antioxidant 1 copper chaperone	0.879354	1.2337e-06	1.18487e-05	0.178531	0.328594	0.532508
ENSMUSG00000018677.10	MGI:1196386	Slc25a39	solute carrier family 25, member 39	0.739075	9.99651e-08	1.35897e-06	0.318941	0.0220937	0.0814675
ENSMUSG00000018727.20	MGI:1277182	Cpsf4l	cleavage and polyadenylation specific factor 4-like	4.94574	9.57709e-05	0.000514304	3.57201	0.0060322
ENSMUSG00000018752.20	MGI:3845075	Tnfsfm13	tumor necrosis factor (ligand) superfamily, membrane-bound member 13	1.0853	3.08123e-05	0.000191407	0.489979	0.0642034	0.175141
ENSMUSG00000018821.4	MGI:1916784	Avpi1	arginine vasopressin-induced 1	0.62852	6.4091e-05	0.000363169	0.460149	0.00389222	0.0218857
ENSMUSG00000018930.4	MGI:98261	Ccl4	chemokine (C-C motif) ligand 4	4.65205	2.22286e-10	7.00584e-09	2.26778	0.005576	0.0289718
ENSMUSG00000018932.10	MGI:1346868	Map2k3	mitogen-activated protein kinase kinase 3	1.33066	6.35951e-13	5.03982e-11	0.45343	0.0160154	0.0643857
ENSMUSG00000018986.11	MGI:1329005	Slfn3	schlafen 3	1.55036	7.92204e-05	0.000435403	-0.0944969	0.822329	0.906738
ENSMUSG00000019088.15	MGI:109628	Dnase1l1	deoxyribonuclease 1-like 1	2.14348	4.131e-08	6.38152e-07	0.920937	0.0252735	0.0897887
ENSMUSG00000019487.12	MGI:2146901	Trip10	thyroid hormone receptor interactor 10	0.905357	0.000795233	0.00324242	0.247564	0.368327	0.571624
ENSMUSG00000019539.12	MGI:1277122	Rcn3	reticulocalbin 3, EF-hand calcium binding domain	1.61337	1.23659e-07	1.63702e-06	0.43975	0.151856	0.320609
ENSMUSG00000019579.14	MGI:2156020	Mydgf	myeloid derived growth factor	0.809555	1.16728e-09	2.95265e-08	0.287699	0.0320752	0.106715
ENSMUSG00000019810.16	MGI:1914098	Fuca2	fucosidase, alpha-L- 2, plasma	0.836129	6.68589e-07	6.96532e-06	0.165588	0.327201	0.53106
ENSMUSG00000019818.16	MGI:1859568	Cd164	CD164 antigen	0.772965	1.41177e-08	2.53011e-07	0.193283	0.157342	0.328412
ENSMUSG00000019842.7	MGI:2143599	Traf3ip2	TRAF3 interacting protein 2	1.75352	0.000455567	0.00200862	0.318821	0.523599	0.705873
ENSMUSG00000019846.12	MGI:109321	Lama4	laminin, alpha 4	1.76223	2.85647e-10	8.7496e-09	0.838152	0.00304348	0.0181739
ENSMUSG00000019853.7	MGI:1860084	Hebp2	heme binding protein 2	1.34865	0.000257774	0.00121739	0.12023	0.74538	0.860183
ENSMUSG00000019866.16	MGI:109544	Crybg1	crystallin beta-gamma domain containing 1	1.91802	2.86928e-05	0.000180077	0.313549	0.503447	0.690902
ENSMUSG00000019920.19	MGI:1195263	Lims1	LIM and senescent cell antigen-like domains 1	0.817309	1.25766e-05	8.72819e-05	0.401636	0.0325032	0.107649
ENSMUSG00000019929.17	MGI:94872	Dcn	decorin	2.3665	0.000588493	0.00250878	0.0330676	0.961694	0.982178
ENSMUSG00000019947.11	MGI:2175912	Arid5b	AT rich interactive domain 5B (MRF1-like)	1.28606	3.45636e-09	7.45827e-08	0.206574	0.343847	0.547626
ENSMUSG00000019952.16	MGI:1918511	Poc1b	POC1 centriolar protein B	0.738347	6.14317e-06	4.72234e-05	0.37668	0.0238432	0.0860294
ENSMUSG00000019970.16	MGI:1340062	Sgk1	serum/glucocorticoid regulated kinase 1	0.627899	0.00129241	0.00494596	0.326411	0.095088	0.23121
ENSMUSG00000019975.13	MGI:1914704	Ikbip	IKBKB interacting protein	0.613572	2.33922e-05	0.000151241	0.418225	0.00474087	0.0255646
ENSMUSG00000019987.10	MGI:88070	Arg1	arginase, liver	7.62899	3.61338e-07	4.079e-06	1.47476	0.352847	0.55665
ENSMUSG00000019992.9	MGI:1919054	Mtfr2	mitochondrial fission regulator 2	1.77601	4.53565e-06	3.63754e-05	1.17429	0.00652227	0.032667
ENSMUSG00000019997.12	MGI:95537	Ccn2	cellular communication network factor 2	3.93805	7.30086e-10	1.96072e-08	0.339412	0.597416	0.761854
ENSMUSG00000020019.5	MGI:1888978	Ntn4	netrin 4	1.15851	3.36112e-06	2.80043e-05	0.752181	0.00295583	0.0177697
ENSMUSG00000020044.14	MGI:98754	Timp3	tissue inhibitor of metalloproteinase 3	0.844847	0.000638345	0.00268663	0.308385	0.212928	0.401238
ENSMUSG00000020048.14	MGI:98817	Hsp90b1	heat shock protein 90, beta (Grp94), member 1	0.59311	0.00125827	0.00483556	0.233366	0.204531	0.390937
ENSMUSG00000020075.9	MGI:1860494	Ddx21	DExD box helicase 21	0.794803	7.28924e-09	1.41881e-07	-0.0436883	0.752444	0.863997
ENSMUSG00000020085.16	MGI:1918611	Aifm2	apoptosis-inducing factor, mitochondrion-associated 2	0.788142	2.06331e-05	0.00013516	0.132983	0.47637	0.668402
ENSMUSG00000020092.10	MGI:1351623	Pald1	phosphatase domain containing, paladin 1	0.804653	0.00105633	0.00415143	0.371006	0.13267	0.291253
ENSMUSG00000020154.11	MGI:97809	Ptprb	protein tyrosine phosphatase, receptor type, B	0.816564	1.9567e-06	1.76142e-05	0.21207	0.217333	0.406652
ENSMUSG00000020186.8	MGI:1202907	Csrp2	cysteine and glycine-rich protein 2	1.1965	1.52434e-09	3.68258e-08	0.331958	0.100884	0.240513
ENSMUSG00000020205.9	MGI:1096880	Phlda1	pleckstrin homology like domain, family A, member 1	1.12358	1.6506e-06	1.51674e-05	-0.0944861	0.692098	0.827016
ENSMUSG00000020212.15	MGI:96951	Mdm1	transformed mouse 3T3 cell double minute 1	0.587929	0.000239517	0.00114185	0.213176	0.178686	0.357566
ENSMUSG00000020216.14	MGI:1916700	Jsrp1	junctional sarcoplasmic reticulum protein 1	1.98913	2.93034e-07	3.42348e-06	0.638669	0.111696	0.258382
ENSMUSG00000020227.11	MGI:1921164	Irak3	interleukin-1 receptor-associated kinase 3	1.77586	1.88527e-05	0.000124775	0.280811	0.504448	0.691324
ENSMUSG00000020228.12	MGI:2152895	Helb	helicase (DNA) B	0.904417	7.55093e-06	5.65237e-05	0.194355	0.346826	0.550693
ENSMUSG00000020241.14	MGI:88460	Col6a2	collagen, type VI, alpha 2	2.26109	0.000127032	0.000654615	0.478231	0.417164	0.618562
ENSMUSG00000020250.12	MGI:1354175	Txnrd1	thioredoxin reductase 1	0.63574	9.9037e-11	3.51306e-09	0.126914	0.199558	0.384113
ENSMUSG00000020260.10	MGI:1916863	Pofut2	protein O-fucosyltransferase 2	0.762523	9.41643e-08	1.29944e-06	0.3548	0.0138031	0.0574914
ENSMUSG00000020272.9	MGI:1099439	Stk10	serine/threonine kinase 10	0.867264	0.000351589	0.00160222	0.583359	0.0172033	0.0679233
ENSMUSG00000020303.3	MGI:1316731	Stc2	stanniocalcin 2	1.25528	0.000366855	0.0016624	-0.592965	0.0977825	0.235692
ENSMUSG00000020325.11	MGI:1890391	Fstl3	follistatin-like 3	1.47525	1.82541e-08	3.15989e-07	0.735554	0.0133298	0.0559467
ENSMUSG00000020357.4	MGI:95561	Flt4	FMS-like tyrosine kinase 4	0.786772	0.000177881	0.000882645	0.140488	0.513483	0.697989
ENSMUSG00000020372.16	MGI:101849	Rack1	receptor for activated C kinase 1	0.68165	2.62007e-07	3.11545e-06	0.409384	0.00201509	0.0131858
ENSMUSG00000020374.17	MGI:1921813	Rasgef1c	RasGEF domain family, member 1C	2.5866	7.79987e-11	2.86771e-09	1.00274	0.0130695	0.0551235
ENSMUSG00000020407.14	MGI:1097668	Upp1	uridine phosphorylase 1	1.25226	2.9213e-05	0.000182756	0.458435	0.131049	0.288644
ENSMUSG00000020423.7	MGI:108384	Btg2	BTG anti-proliferation factor 2	1.50025	1.25519e-08	2.28081e-07	0.00371569	0.988812	0.995383
ENSMUSG00000020424.4	MGI:1919212	Castor1	cytosolic arginine sensor for mTORC1 subunit 1	1.13477	0.000165081	0.000826006	0.693207	0.0241863	0.0869413
ENSMUSG00000020427.12	MGI:96438	Igfbp3	insulin-like growth factor binding protein 3	2.7022	4.67134e-08	7.09629e-07	-0.14751	0.7659	0.872571
ENSMUSG00000020439.18	MGI:1354727	Smtn	smoothelin	1.00047	4.81133e-05	0.000282196	0.554161	0.0270935	0.0943429
ENSMUSG00000020520.15	MGI:1890480	Galnt10	polypeptide N-acetylgalactosaminyltransferase 10	1.31468	9.78278e-08	1.33854e-06	0.700054	0.00485991	0.026039
ENSMUSG00000020553.9	MGI:107375	Pctp	phosphatidylcholine transfer protein	1.53931	1.84554e-05	0.000122502	1.10399	0.00321566	0.018934
ENSMUSG00000020571.14	MGI:1919103	Pdia6	protein disulfide isomerase associated 6	0.869493	0.000255477	0.00120823	-0.051828	0.827571	0.909428
ENSMUSG00000020641.17	MGI:1929628	Rsad2	radical S-adenosyl methionine domain containing 2	2.74682	1.76173e-07	2.21285e-06	1.26726	0.0161545	0.0647822
ENSMUSG00000020644.10	MGI:96397	Id2	inhibitor of DNA binding 2	1.21505	1.27837e-14	1.85466e-12	0.118987	0.452563	0.6488
ENSMUSG00000020660.7	MGI:97742	Pomc	pro-opiomelanocortin-alpha	0.906315	0.00257894	0.00901511	0.77583	0.0209078	0.0783834
ENSMUSG00000020681.15	MGI:87874	Ace	angiotensin I converting enzyme (peptidyl-dipeptidase A) 1	1.84304	5.50233e-11	2.1788e-09	0.478966	0.0916819	0.22544
ENSMUSG00000020682.18	MGI:2153062	Mmp28	matrix metallopeptidase 28 (epilysin)	0.940185	5.06671e-05	0.000295405	0.266264	0.252911	0.450287
ENSMUSG00000020695.15	MGI:107818	Mrc2	mannose receptor, C type 2	1.97045	4.24934e-08	6.5459e-07	0.856587	0.0184054	0.071507
ENSMUSG00000020712.12	MGI:1923120	Tcam1	testicular cell adhesion molecule 1	1.74233	3.34784e-05	0.000205871	0.224661	0.555137	0.73001
ENSMUSG00000020717.20	MGI:97537	Pecam1	platelet/endothelial cell adhesion molecule 1	0.999068	1.66511e-06	1.52905e-05	0.100609	0.631441	0.78594
ENSMUSG00000020766.5	MGI:95730	Galk1	galactokinase 1	1.06942	2.09679e-06	1.87094e-05	0.573899	0.0123156	0.0528334
ENSMUSG00000020782.19	MGI:1918843	Llgl2	LLGL2 scribble cell polarity complex component	1.11971	0.000782967	0.00319955	0.829484	0.0174894	0.0687325
ENSMUSG00000020806.16	MGI:2442473	Rhbdf2	rhomboid 5 homolog 2	1.93953	1.92919e-07	2.39794e-06	0.940759	0.0158638	0.063915
ENSMUSG00000020826.10	MGI:97361	Nos2	nitric oxide synthase 2, inducible	1.06735	0.00277925	0.00960512	0.893812	0.0192326	0.0738378
ENSMUSG00000020829.10	MGI:1098733	Slc46a1	solute carrier family 46, member 1	0.661246	0.000177269	0.000880087	0.366735	0.0387112	0.122262
ENSMUSG00000020834.18	MGI:1917701	Dhrs13	dehydrogenase/reductase (SDR family) member 13	0.721309	0.00015203	0.000768559	-0.0260578	0.891002	0.945762
ENSMUSG00000020841.6	MGI:107265	Cpd	carboxypeptidase D	0.801829	1.47026e-13	1.40959e-11	0.134353	0.21679	0.405971
ENSMUSG00000020865.17	MGI:1923658	Abcc3	ATP-binding cassette, sub-family C (CFTR/MRP), member 3	2.11863	1.62607e-06	1.4962e-05	1.26444	0.00503979	0.0268302
ENSMUSG00000020877.12	MGI:1343092	Scrn2	secernin 2	0.740327	0.000211229	0.00102493	0.256181	0.207754	0.39474
ENSMUSG00000020902.13	MGI:105088	Ntn1	netrin 1	0.986768	1.0774e-05	7.63763e-05	0.207257	0.363123	0.566247
ENSMUSG00000020907.2	MGI:97883	Rcvrn	recoverin	2.55095	2.66105e-07	3.15324e-06	0.273706	0.603453	0.765371
ENSMUSG00000020919.12	MGI:103035	Stat5b	signal transducer and activator of transcription 5B	0.741746	4.9615e-06	3.93305e-05	0.404401	0.0138026	0.0574914
ENSMUSG00000021009.16	MGI:1344406	Ptpn21	protein tyrosine phosphatase, non-receptor type 21	0.705063	2.95221e-06	2.50851e-05	0.252378	0.103002	0.244231
ENSMUSG00000021010.10	MGI:1351610	Npas3	neuronal PAS domain protein 3	0.947585	4.34647e-06	3.50118e-05	0.486255	0.0190684	0.0734065
ENSMUSG00000021025.9	MGI:104741	Nfkbia	nuclear factor of kappa light polypeptide gene enhancer in B cells inhibitor, alpha	0.675278	0.00190968	0.00695119	0.185706	0.39728	0.599863
ENSMUSG00000021069.18	MGI:97829	Pygl	liver glycogen phosphorylase	1.23125	0.000877143	0.00353176	0.435512	0.245324	0.441687
ENSMUSG00000021070.7	MGI:102845	Bdkrb2	bradykinin receptor, beta 2	4.51053	4.79744e-16	1.07381e-13	1.66051	0.00449728	0.0245446
ENSMUSG00000021108.19	MGI:97600	Prkch	protein kinase C, eta	1.29978	1.4425e-05	9.85382e-05	0.455128	0.133336	0.292156
ENSMUSG00000021109.14	MGI:106918	Hif1a	hypoxia inducible factor 1, alpha subunit	0.658246	7.58521e-05	0.000419666	0.00539079	0.974207	0.988711
ENSMUSG00000021175.16	MGI:2384982	Cdca7l	cell division cycle associated 7 like	1.32281	3.32891e-06	2.77746e-05	0.439018	0.138141	0.29949
ENSMUSG00000021176.7	MGI:1926017	Efcab11	EF-hand calcium binding domain 11	2.26031	1.2271e-05	8.55944e-05	1.18646	0.0317578	0.106143
ENSMUSG00000021185.17	MGI:2444813	Dglucy	D-glutamate cyclase	1.08381	8.46996e-05	0.000462458	0.756024	0.00688388	0.0339687
ENSMUSG00000021186.10	MGI:1346091	Fbln5	fibulin 5	1.78041	0.0017947	0.00658778	1.15335	0.0442521	0.13431
ENSMUSG00000021194.7	MGI:88394	Chga	chromogranin A	1.20795	1.44767e-05	9.88427e-05	0.332045	0.233467	0.427412
ENSMUSG00000021213.13	MGI:1351662	Akr1c13	aldo-keto reductase family 1, member C13	3.22064	6.63327e-05	0.000374324	2.05238	0.0216781	0.0804513
ENSMUSG00000021250.14	MGI:95574	Fos	FBJ osteosarcoma oncogene	3.44494	1.0708e-08	1.98388e-07	1.13951	0.0597109	0.166513
ENSMUSG00000021253.8	MGI:98727	Tgfb3	transforming growth factor, beta 3	0.919042	0.000201259	0.000982993	0.30021	0.226992	0.418587
ENSMUSG00000021258.11	MGI:1276106	Ccnk	cyclin K	0.601264	1.98396e-10	6.31825e-09	0.212649	0.0268312	0.0936832
ENSMUSG00000021281.16	MGI:104960	Tnfaip2	tumor necrosis factor, alpha-induced protein 2	2.53119	5.60298e-06	4.36832e-05	1.48884	0.011779	0.0510047
ENSMUSG00000021298.9	MGI:1890220	Gpr132	G protein-coupled receptor 132	4.81394	4.55241e-06	3.64672e-05	1.561	0.1057	0.248779
ENSMUSG00000021322.9	MGI:1350928	Aoah	acyloxyacyl hydrolase	3.09325	0.00012036	0.000624697	0.259576	0.754838	0.865578
ENSMUSG00000021359.17	MGI:104671	Tfap2a	transcription factor AP-2, alpha	2.30096	0.000979887	0.00388779	3.23224	0.00584734	0.0300761
ENSMUSG00000021361.8	MGI:1913404	Tmem14c	transmembrane protein 14C	0.604307	7.51446e-09	1.45719e-07	0.237543	0.0246282	0.0881475
ENSMUSG00000021365.16	MGI:97302	Nedd9	neural precursor cell expressed, developmentally down-regulated gene 9	1.30175	1.25803e-07	1.65842e-06	0.716387	0.00380091	0.0215108
ENSMUSG00000021367.9	MGI:95283	Edn1	endothelin 1	1.4547	1.05506e-05	7.51598e-05	0.0871917	0.797124	0.892561
ENSMUSG00000021408.16	MGI:108212	Ripk1	receptor (TNFRSF)-interacting serine-threonine kinase 1	1.18462	8.46456e-07	8.51172e-06	0.580156	0.0173643	0.0683748
ENSMUSG00000021411.17	MGI:1914145	Pxdc1	PX domain containing 1	0.861025	0.000959035	0.00381665	-0.522183	0.0487084	0.143575
ENSMUSG00000021464.16	MGI:1347521	Ror2	receptor tyrosine kinase-like orphan receptor 2	2.20172	0.000239529	0.00114185	-0.00285019	0.9963	0.998523
ENSMUSG00000021550.7	MGI:1917403	2210016F16Rik	RIKEN cDNA 2210016F16 gene	0.939563	4.0986e-10	1.18912e-08	0.399213	0.00900991	0.0416232
ENSMUSG00000021569.11	MGI:1916966	Trip13	thyroid hormone receptor interactor 13	2.09643	2.02561e-09	4.73473e-08	0.767577	0.0423177	0.130014
ENSMUSG00000021572.10	MGI:1921720	Cep72	centrosomal protein 72	0.889863	4.89508e-05	0.000286434	0.43482	0.0617122	0.170531
ENSMUSG00000021579.5	MGI:2145269	Lrrc14b	leucine rich repeat containing 14B	3.60282	0.00249239	0.00876607	2.1758	0.0509433	0.148452
ENSMUSG00000021585.11	MGI:1098236	Cast	calpastatin	1.14889	6.45405e-06	4.92131e-05	0.341104	0.184985	0.365323
ENSMUSG00000021594.12	MGI:98400	Srd5a1	steroid 5 alpha-reductase 1	0.613991	0.00271815	0.00942485	0.479181	0.0194708	0.0744786
ENSMUSG00000021647.8	MGI:1351330	Cartpt	CART prepropeptide	5.83353	1.38436e-08	2.48424e-07	-0.708658	0.494249	0.683353
ENSMUSG00000021707.6	MGI:94890	Dhfr	dihydrofolate reductase	1.37942	1.39928e-14	2.01938e-12	0.438149	0.0174773	0.0687004
ENSMUSG00000021720.12	MGI:1919066	Rnf180	ring finger protein 180	0.738116	5.72125e-08	8.42066e-07	0.407867	0.00292333	0.0176361
ENSMUSG00000021754.18	MGI:1346872	Map3k1	mitogen-activated protein kinase kinase kinase 1	0.785302	0.000323284	0.00148699	0.35683	0.105385	0.248339
ENSMUSG00000021756.13	MGI:96560	Il6st	interleukin 6 signal transducer	0.685453	2.19382e-05	0.000142851	0.486487	0.00264209	0.0163245
ENSMUSG00000021806.5	MGI:1298229	Nid2	nidogen 2	1.31503	1.60584e-06	1.48256e-05	0.694432	0.0133151	0.0559239
ENSMUSG00000021822.4	MGI:97611	Plau	plasminogen activator, urokinase	3.33447	8.53374e-15	1.33574e-12	1.36504	0.0019619	0.0129222
ENSMUSG00000021838.18	MGI:1921730	Samd4	sterile alpha motif domain containing 4	1.3788	9.24735e-10	2.40116e-08	0.303246	0.181075	0.360456
ENSMUSG00000021876.16	MGI:1926217	Rnase4	ribonuclease, RNase A family 4	1.63422	1.44599e-06	1.35645e-05	1.07303	0.00162785	0.0111878
ENSMUSG00000021890.7	MGI:1921677	Eaf1	ELL associated factor 1	0.850913	2.34284e-08	3.90047e-07	0.0716551	0.640589	0.792609
ENSMUSG00000021939.9	MGI:88561	Ctsb	cathepsin B	1.823	4.09699e-08	6.33612e-07	0.894524	0.00710632	0.0347313
ENSMUSG00000021996.17	MGI:95421	Esd	esterase D/formylglutathione hydrolase	0.620709	1.09092e-09	2.7878e-08	0.0451253	0.659098	0.804703
ENSMUSG00000022015.9	MGI:1100089	Tnfsf11	tumor necrosis factor (ligand) superfamily, member 11	3.67329	0.000819772	0.00333257	1.71496	0.143179	0.307556
ENSMUSG00000022032.15	MGI:1918395	Scara5	scavenger receptor class A, member 5	2.46045	0.00113357	0.00441951	0.515013	0.494458	0.683451
ENSMUSG00000022070.8	MGI:1924994	Bora	bora, aurora kinase A activator	0.937203	8.13886e-05	0.000446514	0.61455	0.0129635	0.0548015
ENSMUSG00000022074.7	MGI:1341090	Tnfrsf10b	tumor necrosis factor receptor superfamily, member 10b	2.76627	2.71304e-10	8.38689e-09	1.36859	0.00381829	0.0215736
ENSMUSG00000022090.11	MGI:2384850	Pdlim2	PDZ and LIM domain 2	1.11692	0.000167067	0.000835485	0.550023	0.0657509	0.17837
ENSMUSG00000022096.15	MGI:96223	Hr	lysine demethylase and nuclear receptor corepressor	1.41246	1.97687e-05	0.000130114	0.726964	0.0291203	0.0995165
ENSMUSG00000022102.14	MGI:1332623	Dok2	docking protein 2	1.61703	5.12591e-05	0.000298413	0.689365	0.102311	0.243002
ENSMUSG00000022114.6	MGI:1345138	Spry2	sprouty RTK signaling antagonist 2	0.923069	0.000100031	0.000533185	-0.0014282	0.995215	0.998159
ENSMUSG00000022125.8	MGI:2442253	Cln5	ceroid-lipofuscinosis, neuronal 5	0.807963	0.000120076	0.000623457	0.571772	0.00701683	0.0344261
ENSMUSG00000022144.5	MGI:107430	Gdnf	glial cell line derived neurotrophic factor	5.55125	3.17643e-06	2.67133e-05	1.72713	0.143344	0.307801
ENSMUSG00000022150.17	MGI:109175	Dab2	disabled 2, mitogen-responsive phosphoprotein	2.86622	1.11698e-14	1.64664e-12	0.997435	0.00752968	0.0362332
ENSMUSG00000022177.10	MGI:1261794	Haus4	HAUS augmin-like complex, subunit 4	0.893821	7.61604e-05	0.000421117	0.438801	0.0629156	0.172786
ENSMUSG00000022178.12	MGI:1341886	Ajuba	ajuba LIM protein	1.53929	1.74174e-06	1.58825e-05	0.490316	0.147893	0.314452
ENSMUSG00000022203.8	MGI:105311	Efs	embryonal Fyn-associated substrate	0.667791	0.000530326	0.00229507	0.582162	0.00273875	0.0167708
ENSMUSG00000022216.18	MGI:1096367	Psme1	proteasome (prosome, macropain) activator subunit 1 (PA28 alpha)	0.897778	2.41564e-06	2.1108e-05	0.482034	0.0115244	0.0501554
ENSMUSG00000022221.15	MGI:2154952	Ripk3	receptor-interacting serine-threonine kinase 3	2.82106	4.50045e-07	4.91839e-06	0.985863	0.0982741	0.236521
ENSMUSG00000022236.11	MGI:2182357	Ropn1l	ropporin 1-like	1.66985	1.90417e-06	1.71808e-05	0.653172	0.0723779	0.191192
ENSMUSG00000022246.15	MGI:1922896	Rai14	retinoic acid induced 14	2.0771	1.10285e-07	1.48091e-06	0.340381	0.388763	0.591272
ENSMUSG00000022269.14	MGI:3608327	Marchf11	membrane associated ring-CH-type finger 11	1.08665	8.79796e-05	0.000477291	-0.0982793	0.727726	0.848543
ENSMUSG00000022297.16	MGI:108474	Fzd6	frizzled class receptor 6	0.626538	0.000619125	0.00262172	0.444781	0.0169157	0.0669709
ENSMUSG00000022346.18	MGI:97250	Myc	myelocytomatosis oncogene	1.57767	9.36049e-09	1.76039e-07	0.699946	0.0127437	0.0541103
ENSMUSG00000022367.8	MGI:107821	Has2	hyaluronan synthase 2	4.41389	2.89835e-12	1.79803e-10	1.76133	0.0068787	0.0339571
ENSMUSG00000022369.14	MGI:2146005	Mtbp	Mdm2, transformed 3T3 cell double minute p53 binding protein	1.33949	4.95926e-09	1.0148e-07	0.496711	0.0386437	0.122177
ENSMUSG00000022408.8	MGI:2146227	Fam83f	family with sequence similarity 83, member F	5.23311	0.000111412	0.000584786	-1.50327	0.286824
ENSMUSG00000022422.14	MGI:1919357	Dscc1	DNA replication and sister chromatid cohesion 1	3.30948	1.99838e-07	2.46849e-06	2.06515	0.00169885	0.0115602
ENSMUSG00000022439.10	MGI:2158329	Parvg	parvin, gamma	0.757805	0.000532654	0.00230405	0.467442	0.0333736	0.109623
ENSMUSG00000022440.10	MGI:1919959	C1qtnf6	C1q and tumor necrosis factor related protein 6	0.937742	3.57453e-05	0.000217759	0.556062	0.0172124	0.067936
ENSMUSG00000022443.18	MGI:107717	Myh9	myosin, heavy polypeptide 9, non-muscle	1.20713	4.08242e-13	3.46564e-11	0.399207	0.0166578	0.0661823
ENSMUSG00000022453.9	MGI:1261422	Naga	N-acetyl galactosaminidase, alpha	0.770131	5.92763e-06	4.58493e-05	0.536609	0.00177606	0.0119636
ENSMUSG00000022479.16	MGI:103076	Vdr	vitamin D (1,25-dihydroxyvitamin D3) receptor	3.44744	1.89766e-05	0.000125534	2.15984	0.0119942	0.051742
ENSMUSG00000022483.18	MGI:88452	Col2a1	collagen, type II, alpha 1	2.85905	1.736e-07	2.18455e-06	1.37737	0.016384	0.06543
ENSMUSG00000022500.16	MGI:1929512	Litaf	LPS-induced TN factor	2.09825	3.67491e-12	2.1814e-10	0.922342	0.00240726	0.0151738
ENSMUSG00000022503.11	MGI:1347073	Nubp1	nucleotide binding protein 1	0.60175	1.19226e-10	4.15398e-09	0.207322	0.0290026	0.0992181
ENSMUSG00000022534.15	MGI:1859396	Mefv	Mediterranean fever	5.78952	0.00196241	0.00710636	0.792794	0.691307	0.826276
ENSMUSG00000022544.15	MGI:1917761	Eef2kmt	eukaryotic elongation factor 2 lysine methyltransferase	1.19325	3.83918e-08	5.98807e-07	0.544642	0.0137343	0.0572588
ENSMUSG00000022586.12	MGI:1888480	Ly6i	lymphocyte antigen 6 complex, locus I	1.01957	0.00289212	0.00994505	-0.377388	0.30209	0.505256
ENSMUSG00000022602.15	MGI:88067	Arc	activity regulated cytoskeletal-associated protein	1.69768	3.07988e-05	0.000191367	-0.353488	0.38597	0.588127
ENSMUSG00000022610.11	MGI:1353438	Mapk12	mitogen-activated protein kinase 12	2.37881	8.33714e-13	6.31504e-11	0.581545	0.0834389	0.210798
ENSMUSG00000022667.19	MGI:1889024	Cd200r1	CD200 receptor 1	2.07082	0.000267874	0.0012601	1.72154	0.00585439	0.030106
ENSMUSG00000022673.6	MGI:103199	Mcm4	minichromosome maintenance complex component 4	1.34667	6.77345e-16	1.42868e-13	0.511928	0.00253486	0.0158287
ENSMUSG00000022769.10	MGI:2149842	Sdf2l1	stromal cell-derived factor 2-like 1	1.38703	1.90636e-05	0.000125988	0.529611	0.105245	0.248108
ENSMUSG00000022780.6	MGI:1353421	Meltf	melanotransferrin	1.44531	0.000117586	0.000612735	0.946356	0.0170738	0.0674785
ENSMUSG00000022799.5	MGI:1333857	Arhgap31	Rho GTPase activating protein 31	1.2227	8.31286e-08	1.17132e-06	0.259436	0.256428	0.454697
ENSMUSG00000022816.12	MGI:102793	Fstl1	follistatin-like 1	0.962163	1.32855e-05	9.16912e-05	0.0987502	0.655747	0.802417
ENSMUSG00000022833.8	MGI:2443448	Ccdc14	coiled-coil domain containing 14	0.672675	0.000217658	0.00105296	0.429772	0.0217038	0.0805218
ENSMUSG00000022881.16	MGI:2146571	Rfc4	replication factor C (activator 1) 4	1.20983	2.21033e-08	3.71368e-07	0.63859	0.00451507	0.0246138
ENSMUSG00000022885.17	MGI:108470	St6gal1	beta galactoside alpha 2,6 sialyltransferase 1	0.801515	0.000541276	0.00233545	0.445957	0.0552873	0.157689
ENSMUSG00000022893.15	MGI:109249	Adamts1	a disintegrin-like and metallopeptidase (reprolysin type) with thrombospondin type 1 motif, 1	2.01021	2.79923e-06	2.39854e-05	0.00431213	0.991999	0.996697
ENSMUSG00000022894.7	MGI:1346321	Adamts5	a disintegrin-like and metallopeptidase (reprolysin type) with thrombospondin type 1 motif, 5 (aggrecanase-2)	2.2969	2.84015e-07	3.32949e-06	0.107239	0.817937	0.904342
ENSMUSG00000022996.16	MGI:108061	Wnt10b	wingless-type MMTV integration site family, member 10B	2.55534	1.95418e-06	1.75973e-05	-0.398839	0.484318	0.675415
ENSMUSG00000023000.6	MGI:94891	Dhh	desert hedgehog	2.39161	0.000470577	0.00206683	1.29937	0.0588292	0.164896
ENSMUSG00000023004.9	MGI:107804	Tuba1b	tubulin, alpha 1B	0.664475	3.20247e-08	5.12919e-07	0.199234	0.0973708	0.23511
ENSMUSG00000023008.19	MGI:109569	Fmnl3	formin-like 3	1.04035	8.37761e-05	0.000457963	0.734598	0.00579161	0.0298533
ENSMUSG00000023022.15	MGI:1920992	Lima1	LIM domain and actin binding 1	0.922242	1.70369e-05	0.00011447	0.639819	0.00304077	0.0181623
ENSMUSG00000023034.8	MGI:1352454	Nr4a1	nuclear receptor subfamily 4, group A, member 1	1.91536	4.06901e-05	0.000243501	-0.385076	0.410201	0.611992
ENSMUSG00000023045.14	MGI:1332226	Soat2	sterol O-acyltransferase 2	3.32962	1.54699e-05	0.000105087	2.33389	0.00215472	0.013873
ENSMUSG00000023066.11	MGI:2179288	Rttn	rotatin	0.636521	6.26578e-05	0.000356152	0.189574	0.24603	0.442593
ENSMUSG00000023143.11	MGI:1351598	Nagpa	N-acetylglucosamine-1-phosphodiester alpha-N-acetylglucosaminidase	1.09411	2.58519e-06	2.2418e-05	0.703609	0.00290605	0.0175671
ENSMUSG00000023243.10	MGI:1336175	Kcnk5	potassium channel, subfamily K, member 5	2.31387	0.000121553	0.000630173	1.75588	0.00458139	0.0249019
ENSMUSG00000023272.5	MGI:1923987	Creld2	cysteine-rich with EGF-like domains 2	0.737207	0.000449773	0.00198627	0.223728	0.291333	0.494244
ENSMUSG00000023349.15	MGI:1861231	Clec4n	C-type lectin domain family 4, member n	2.19867	0.00139865	0.00528686	0.172456	0.816156	0.903245
ENSMUSG00000023393.16	MGI:1919107	Slc17a9	solute carrier family 17, member 9	1.47521	0.00151868	0.00568182	0.134835	0.7908	0.888609
ENSMUSG00000023411.13	MGI:1920431	Nfatc4	nuclear factor of activated T cells, cytoplasmic, calcineurin dependent 4	1.43896	1.89557e-05	0.000125426	0.336347	0.31677	0.520324
ENSMUSG00000023882.16	MGI:99201	Zfp54	zinc finger protein 54	1.07195	1.83695e-06	1.66399e-05	0.679631	0.00389265	0.0218857
ENSMUSG00000023919.10	MGI:1933744	Cenpq	centromere protein Q	1.14774	3.6342e-09	7.77906e-08	0.50648	0.0110911	0.0487549
ENSMUSG00000023935.11	MGI:1918270	Spats1	spermatogenesis associated, serine-rich 1	0.673261	0.0028456	0.00980846	0.486442	0.0324102	0.107487
ENSMUSG00000023953.10	MGI:1891457	Polh	polymerase (DNA directed), eta (RAD 30 related)	1.07606	5.59421e-07	5.9524e-06	0.175496	0.421075	0.621886
ENSMUSG00000023963.11	MGI:1927096	Cyp39a1	cytochrome P450, family 39, subfamily a, polypeptide 1	1.55701	7.26649e-05	0.000405468	0.833712	0.0386678	0.122192
ENSMUSG00000023972.11	MGI:1918711	Ptk7	PTK7 protein tyrosine kinase 7	0.813333	4.61813e-06	3.69397e-05	0.00654821	0.971065	0.986702
ENSMUSG00000024033.11	MGI:1194909	Rsph1	radial spoke head 1 homolog (Chlamydomonas)	1.23956	5.73458e-05	0.000329027	0.829878	0.00796919	0.0378108
ENSMUSG00000024042.8	MGI:104754	Sik1	salt inducible kinase 1	2.15641	4.21466e-15	7.17801e-13	0.347806	0.20913	0.396599
ENSMUSG00000024043.14	MGI:2147003	Arhgap28	Rho GTPase activating protein 28	2.33697	0.000152194	0.000768776	0.331951	0.599817	0.762691
ENSMUSG00000024048.16	MGI:1914518	Myl12a	myosin, light chain 12A, regulatory, non-sarcomeric	0.924692	1.74569e-09	4.13716e-08	0.301688	0.0508819	0.148363
ENSMUSG00000024053.12	MGI:2389136	Emilin2	elastin microfibril interfacer 2	2.87198	2.03134e-11	9.16594e-10	0.489712	0.265339	0.464401
ENSMUSG00000024063.14	MGI:1925139	Lbh	limb-bud and heart	1.31836	3.19688e-09	6.97362e-08	0.666082	0.00286296	0.0173694
ENSMUSG00000024066.10	MGI:98973	Xdh	xanthine dehydrogenase	2.50099	4.07854e-08	6.31472e-07	1.46056	0.00141476	0.0100095
ENSMUSG00000024070.16	MGI:1922542	Prkd3	protein kinase D3	0.720444	3.3761e-05	0.000207323	0.449593	0.0101654	0.0455603
ENSMUSG00000024085.14	MGI:104669	Man2a1	mannosidase 2, alpha 1	0.928666	0.000438305	0.00194345	-0.278137	0.294079	0.497114
ENSMUSG00000024087.5	MGI:88590	Cyp1b1	cytochrome P450, family 1, subfamily b, polypeptide 1	1.86563	3.0058e-06	2.54852e-05	0.789441	0.0504385	0.147356
ENSMUSG00000024143.16	MGI:1931553	Rhoq	ras homolog family member Q	0.86721	3.4727e-07	3.94291e-06	0.392554	0.0216512	0.0803638
ENSMUSG00000024190.8	MGI:105120	Dusp1	dual specificity phosphatase 1	2.02023	8.30947e-07	8.39211e-06	-0.778449	0.0599302	0.166951
ENSMUSG00000024235.12	MGI:1346878	Map3k8	mitogen-activated protein kinase kinase kinase 8	1.18888	8.58655e-05	0.000467799	0.974445	0.00174675	0.0118092
ENSMUSG00000024236.19	MGI:2147319	Svil	supervillin	1.49937	3.37486e-07	3.85257e-06	0.589327	0.046794	0.139538
ENSMUSG00000024301.11	MGI:2137414	Kifc5b	kinesin family member C5B	1.28072	1.03255e-08	1.9208e-07	0.614127	0.0108277	0.047851
ENSMUSG00000024312.11	MGI:1931871	Wdr46	WD repeat domain 46	0.639801	1.72375e-08	3.01052e-07	0.349329	0.00283524	0.0172344
ENSMUSG00000024331.12	MGI:103221	Dsc2	desmocollin 2	1.82466	0.000187564	0.000924502	1.21031	0.0231067	0.0841171
ENSMUSG00000024346.7	MGI:1914449	Pfdn1	prefoldin 1	0.661311	1.78668e-09	4.21608e-08	0.0962423	0.384109	0.586484
ENSMUSG00000024369.17	MGI:102744	Nelfe	negative elongation factor complex member E, Rdbp	0.654999	2.10149e-09	4.89159e-08	0.194774	0.0788894	0.202587
ENSMUSG00000024401.15	MGI:104798	Tnf	tumor necrosis factor	5.45404	6.64568e-06	5.04917e-05	1.70376	0.156011	0.32654
ENSMUSG00000024427.8	MGI:1345144	Spry4	sprouty RTK signaling antagonist 4	0.854861	0.00157721	0.00587515	-0.399416	0.141212	0.304365
ENSMUSG00000024437.7	MGI:3647532	Gm8615	predicted pseudogene 8615	1.13816	3.35311e-05	0.000206149	0.1633	0.569122	0.741506
ENSMUSG00000024451.10	MGI:2147274	Arap3	ArfGAP with RhoGAP domain, ankyrin repeat and PH domain 3	0.678189	0.00139756	0.00528349	0.475713	0.0264774	0.092777
ENSMUSG00000024486.7	MGI:96070	Hbegf	heparin-binding EGF-like growth factor	3.2975	2.76374e-17	8.32765e-15	1.22379	0.00172372	0.011693
ENSMUSG00000024501.21	MGI:1349762	Dpysl3	dihydropyrimidinase-like 3	0.894372	4.47759e-06	3.59518e-05	0.0111844	0.95428	0.978528
ENSMUSG00000024521.9	MGI:1930146	Pmaip1	phorbol-12-myristate-13-acetate-induced protein 1	1.38778	0.00153391	0.0057302	1.02837	0.022757	0.0832348
ENSMUSG00000024529.15	MGI:96817	Lox	lysyl oxidase	2.23708	0.00147303	0.00553447	1.29343	0.0786282	0.20202
ENSMUSG00000024538.9	MGI:97751	Ppic	peptidylprolyl isomerase C	1.05903	0.000289985	0.0013532	0.485364	0.106608	0.250143
ENSMUSG00000024542.10	MGI:1918049	Cep192	centrosomal protein 192	0.663659	3.53963e-05	0.000216066	0.22883	0.156795	0.327784
ENSMUSG00000024565.11	MGI:109295	Sall3	spalt like transcription factor 3	0.895525	0.000469234	0.00206126	0.802718	0.0020276	0.0132461
ENSMUSG00000024610.16	MGI:96534	Cd74	CD74 antigen (invariant polypeptide of major histocompatibility complex, class II antigen-associated)	4.20062	1.80083e-09	4.23851e-08	1.68354	0.0187414	0.0724262
ENSMUSG00000024620.12	MGI:97531	Pdgfrb	platelet derived growth factor receptor, beta polypeptide	0.765985	3.03559e-05	0.000189001	0.22993	0.212884	0.401187
ENSMUSG00000024644.18	MGI:1913304	Cndp2	CNDP dipeptidase 2 (metallopeptidase M20 family)	0.744178	9.87279e-06	7.11651e-05	0.0710958	0.67419	0.814899
ENSMUSG00000024659.16	MGI:96819	Anxa1	annexin A1	3.75506	2.74967e-09	6.16988e-08	0.554202	0.386497	0.588572
ENSMUSG00000024669.9	MGI:88340	Cd5	CD5 antigen	4.62168	1.41282e-05	9.68731e-05	1.07439	0.261677	0.460435
ENSMUSG00000024670.18	MGI:103566	Cd6	CD6 antigen	3.073	1.11846e-06	1.08791e-05	0.854803	0.222961	0.413429
ENSMUSG00000024672.12	MGI:1918846	Ms4a7	membrane-spanning 4-domains, subfamily A, member 7	4.71654	3.45713e-09	7.45827e-08	0.886001	0.290284	0.49316
ENSMUSG00000024696.10	MGI:2147677	Lpxn	leupaxin	2.14129	1.13631e-07	1.51915e-06	1.24232	0.00273535	0.0167543
ENSMUSG00000024713.17	MGI:97515	Pcsk5	proprotein convertase subtilisin/kexin type 5	1.16574	0.0027786	0.00960408	0.530994	0.1734	0.350606
ENSMUSG00000024725.14	MGI:700012	Ostf1	osteoclast stimulating factor 1	1.08123	1.1118e-06	1.0822e-05	0.632471	0.00457886	0.0248938
ENSMUSG00000024727.10	MGI:2675603	Trpm6	transient receptor potential cation channel, subfamily M, member 6	1.76242	0.000145848	0.00074073	0.366166	0.428302	0.628084
ENSMUSG00000024732.8	MGI:1277220	Ccdc86	coiled-coil domain containing 86	0.991904	5.4936e-08	8.15122e-07	0.193391	0.297198	0.500101
ENSMUSG00000024742.16	MGI:102779	Fen1	flap structure specific endonuclease 1	0.883345	1.42936e-09	3.48384e-08	0.292053	0.0519814	0.150703
ENSMUSG00000024754.14	MGI:1890373	Cemip2	cell migration inducing hyaluronidase 2	0.970156	7.65878e-10	2.03887e-08	0.503226	0.00150732	0.0105372
ENSMUSG00000024781.17	MGI:96789	Lipa	lysosomal acid lipase A	1.48197	8.42218e-07	8.47817e-06	0.347032	0.250094	0.447192
ENSMUSG00000024810.17	MGI:1924375	Il33	interleukin 33	1.46658	1.40906e-07	1.82765e-06	0.363995	0.192043	0.374232
ENSMUSG00000024812.12	MGI:1341872	Tjp2	tight junction protein 2	0.864685	1.22899e-08	2.23764e-07	0.467834	0.00217457	0.0139596
ENSMUSG00000024866.11	MGI:1918920	Acy3	aspartoacylase (aminoacylase) 3	1.20111	0.000671639	0.00280822	0.19111	0.60365	0.76545
ENSMUSG00000024875.6	MGI:1915340	Yif1a	Yip1 interacting factor homolog A (S. cerevisiae)	0.997186	1.22791e-09	3.08044e-08	0.521192	0.00173103	0.0117359
ENSMUSG00000024900.6	MGI:1098296	Cpt1a	carnitine palmitoyltransferase 1a, liver	0.942607	5.93509e-07	6.25683e-06	0.555322	0.00341806	0.0197438
ENSMUSG00000024912.7	MGI:107179	Fosl1	fos-like antigen 1	5.32673	1.76021e-08	3.06639e-07	3.4077	0.00245024	0.0154056
ENSMUSG00000024913.17	MGI:1278315	Lrp5	low density lipoprotein receptor-related protein 5	1.04913	3.62801e-05	0.000220381	0.738754	0.00389971	0.0219202
ENSMUSG00000024925.12	MGI:1915459	Rnaseh2c	ribonuclease H2, subunit C	0.589979	6.99847e-05	0.00039251	0.347275	0.0235604	0.0853291
ENSMUSG00000024927.9	MGI:103290	Rela	v-rel reticuloendotheliosis viral oncogene homolog A (avian)	0.878009	4.2538e-06	3.43081e-05	0.451801	0.0187301	0.0723938
ENSMUSG00000025001.12	MGI:106209	Hells	helicase, lymphoid specific	1.47654	3.8623e-13	3.33327e-11	0.423618	0.0435691	0.132919
ENSMUSG00000025007.14	MGI:1888908	Aldh18a1	aldehyde dehydrogenase 18 family, member A1	0.5988	4.85769e-05	0.000284672	0.0458216	0.757352	0.867448
ENSMUSG00000025014.14	MGI:98659	Dntt	deoxynucleotidyltransferase, terminal	3.24366	0.000235764	0.00112625	0.830117	0.412126	0.61395
ENSMUSG00000025044.17	MGI:98257	Msr1	macrophage scavenger receptor 1	6.71482	2.24585e-16	5.47669e-14	1.69433	0.0476197	0.14111
ENSMUSG00000025076.13	MGI:109383	Casp7	caspase 7	1.90873	2.38046e-09	5.44843e-08	0.859079	0.00869364	0.0404955
ENSMUSG00000025083.19	MGI:2147658	Afap1l2	actin filament associated protein 1-like 2	0.949793	0.00045556	0.00200862	0.39469	0.147938	0.314492
ENSMUSG00000025089.16	MGI:1100842	Gfra1	glial cell line derived neurotrophic factor family receptor alpha 1	1.66989	8.05234e-06	5.97875e-05	0.528928	0.157452	0.328528
ENSMUSG00000025130.12	MGI:97464	P4hb	prolyl 4-hydroxylase, beta polypeptide	1.13415	1.05033e-11	5.37313e-10	0.498552	0.00284698	0.017297
ENSMUSG00000025132.14	MGI:2178103	Arhgdia	Rho GDP dissociation inhibitor (GDI) alpha	0.67458	1.15793e-07	1.54578e-06	0.352974	0.00560566	0.0290868
ENSMUSG00000025150.11	MGI:107200	Cbr2	carbonyl reductase 2	2.07093	3.40678e-06	2.8333e-05	1.45926	0.00150279	0.0105116
ENSMUSG00000025169.7	MGI:1913429	Ogfod3	2-oxoglutarate and iron-dependent oxygenase domain containing 3	0.690276	0.000198558	0.000971359	0.152732	0.427342	0.627211
ENSMUSG00000025185.15	MGI:1914823	Loxl4	lysyl oxidase-like 4	4.33292	7.85492e-05	0.00043232	0.217784	0.825535	0.908523
ENSMUSG00000025195.10	MGI:1917352	Dnmbp	dynamin binding protein	0.651946	3.46491e-07	3.93571e-06	0.374873	0.00391131	0.0219768
ENSMUSG00000025257.6	MGI:1913861	Ribc1	RIB43A domain with coiled-coils 1	1.54453	0.00261667	0.00912722	1.38309	0.0215543	0.0801826
ENSMUSG00000025289.16	MGI:1859815	Prdx4	peroxiredoxin 4	1.28071	1.09448e-06	1.068e-05	0.622962	0.0189473	0.0730583
ENSMUSG00000025330.7	MGI:1338898	Padi4	peptidyl arginine deiminase, type IV	4.96627	0.00137905	0.00522358	1.49804	0.318459	0.522024
ENSMUSG00000025353.6	MGI:1914094	Ormdl2	ORM1-like 2 (S. cerevisiae)	0.930089	0.000133225	0.000683323	0.581948	0.0186337	0.0721606
ENSMUSG00000025359.11	MGI:98301	Pmel	premelanosome protein	1.69507	0.00107945	0.00423137	1.61517	0.00326459	0.0191098
ENSMUSG00000025366.9	MGI:1344426	Esyt1	extended synaptotagmin-like protein 1	2.19505	1.57909e-10	5.19793e-09	0.770031	0.0257766	0.0909312
ENSMUSG00000025395.15	MGI:97757	Prim1	DNA primase, p49 subunit	0.881795	1.18989e-07	1.58305e-06	0.385106	0.0244385	0.0875967
ENSMUSG00000025400.12	MGI:98476	Tac2	tachykinin 2	1.7396	0.000993762	0.00393828	0.795139	0.136695	0.297375
ENSMUSG00000025473.17	MGI:107825	Adam8	a disintegrin and metallopeptidase domain 8	1.57767	1.78709e-05	0.000119459	-0.34327	0.355331	0.558592
ENSMUSG00000025494.9	MGI:1344402	Sigirr	single immunoglobulin and toll-interleukin 1 receptor (TIR) domain	0.901629	0.000801274	0.00326357	0.155828	0.576534	0.747355
ENSMUSG00000025496.6	MGI:94926	Drd4	dopamine receptor D4	3.55875	3.77527e-06	3.09471e-05	1.97245	0.00328236	0.0191952
ENSMUSG00000025507.14	MGI:1889507	Pidd1	p53 induced death domain protein 1	1.39832	3.61309e-07	4.079e-06	0.464846	0.102531	0.243404
ENSMUSG00000025508.14	MGI:1914436	Rplp2	ribosomal protein, large P2	0.634717	9.42416e-06	6.85075e-05	0.311965	0.0298789	0.101257
ENSMUSG00000025525.13	MGI:1915367	Apool	apolipoprotein O-like	0.820497	5.69e-06	4.42735e-05	0.410358	0.028264	0.0974188
ENSMUSG00000025608.10	MGI:1351317	Podxl	podocalyxin-like	0.843639	2.56791e-05	0.000163445	0.285184	0.155797	0.326322
ENSMUSG00000025650.14	MGI:88462	Col7a1	collagen, type VII, alpha 1	1.42519	2.76177e-06	2.36946e-05	0.639472	0.0372495	0.118958
ENSMUSG00000025701.13	MGI:87999	Alox5	arachidonate 5-lipoxygenase	1.74733	0.000273466	0.00128288	1.47404	0.00391159	0.0219768
ENSMUSG00000025743.15	MGI:1349163	Sdc3	syndecan 3	1.24305	3.01382e-11	1.27333e-09	0.567592	0.0024261	0.0152686
ENSMUSG00000025747.13	MGI:98878	Tyms	thymidylate synthase	1.41876	3.29627e-12	1.99083e-10	0.423213	0.0437731	0.13334
ENSMUSG00000025758.11	MGI:101783	Plk4	polo like kinase 4	1.69595	1.03571e-12	7.55296e-11	0.642144	0.0089587	0.0414265
ENSMUSG00000025779.11	MGI:1341909	Ly96	lymphocyte antigen 96	0.823996	0.000743295	0.00306207	0.591684	0.0220915	0.0814675
ENSMUSG00000025804.6	MGI:104618	Ccr1	chemokine (C-C motif) receptor 1	3.0691	9.54386e-08	1.31306e-06	1.6462	0.00791226	0.0376298
ENSMUSG00000025809.16	MGI:96610	Itgb1	integrin beta 1 (fibronectin receptor beta)	1.47375	1.20815e-09	3.042e-08	0.763191	0.00167444	0.0114306
ENSMUSG00000025823.10	MGI:104864	Pdia4	protein disulfide isomerase associated 4	1.07237	2.762e-05	0.000174181	0.505631	0.0485708	0.143307
ENSMUSG00000025854.16	MGI:2136853	Fam20c	FAM20C, golgi associated secretory pathway kinase	0.586849	0.000313123	0.00144616	-0.308543	0.0596537	0.166392
ENSMUSG00000025857.11	MGI:3616079	Dnaaf5	dynein, axonemal assembly factor 5	0.608747	4.08618e-05	0.000244316	0.250507	0.103291	0.244677
ENSMUSG00000025880.12	MGI:1100518	Smad7	SMAD family member 7	1.12882	1.34168e-05	9.25509e-05	0.0176487	0.946147	0.974815
ENSMUSG00000025887.11	MGI:1312922	Casp12	caspase 12	2.36576	2.68379e-06	2.31268e-05	1.63981	0.00192515	0.0127324
ENSMUSG00000025912.17	MGI:99925	Mybl1	myeloblastosis oncogene-like 1	1.90484	2.16478e-09	5.02611e-08	0.682492	0.0371417	0.118743
ENSMUSG00000025915.15	MGI:2182368	Sgk3	serum/glucocorticoid regulated kinase 3	0.657913	0.000839415	0.00340032	0.30446	0.126369	0.281222
ENSMUSG00000025935.11	MGI:1919515	Tram1	translocating chain-associating membrane protein 1	0.724493	1.12816e-06	1.09617e-05	0.100008	0.503841	0.691118
ENSMUSG00000025981.14	MGI:1915126	Coq10b	coenzyme Q10B	0.599036	0.000271238	0.00127417	0.132996	0.423838	0.623996
ENSMUSG00000025997.14	MGI:1342541	Ikzf2	IKAROS family zinc finger 2	0.701663	0.00126493	0.00485775	0.353542	0.110011	0.255656
ENSMUSG00000026003.6	MGI:87866	Acadl	acyl-Coenzyme A dehydrogenase, long-chain	0.629444	2.31225e-05	0.000149816	0.278899	0.062036	0.171118
ENSMUSG00000026012.3	MGI:88327	Cd28	CD28 antigen	4.01545	2.22601e-06	1.96958e-05	1.49876	0.0837157	0.211288
ENSMUSG00000026028.13	MGI:1918077	Trak2	trafficking protein, kinesin binding 2	0.931076	9.97808e-06	7.17609e-05	0.614493	0.00355864	0.0203941
ENSMUSG00000026042.17	MGI:88458	Col5a2	collagen, type V, alpha 2	2.11574	1.72522e-06	1.57633e-05	0.587843	0.184081	0.364457
ENSMUSG00000026043.19	MGI:88453	Col3a1	collagen, type III, alpha 1	2.98526	5.05811e-05	0.000294967	1.58493	0.0324182	0.107488
ENSMUSG00000026088.16	MGI:1916278	Mitd1	MIT, microtubule interacting and transport, domain containing 1	0.627396	5.93685e-06	4.59076e-05	0.336176	0.0179026	0.0699831
ENSMUSG00000026094.15	MGI:2138162	Stk17b	serine/threonine kinase 17b (apoptosis-inducing)	0.851009	0.000231308	0.00110766	0.408086	0.0829743	0.209995
ENSMUSG00000026095.16	MGI:1917646	Asnsd1	asparagine synthetase domain containing 1	0.604212	1.30153e-05	9.01436e-05	0.144089	0.303143	0.506348
ENSMUSG00000026121.14	MGI:109252	Sema4c	sema domain, immunoglobulin domain (Ig), transmembrane domain (TM) and short cytoplasmic domain, (semaphorin) 4C	0.935266	9.12123e-06	6.66293e-05	0.668775	0.0016725	0.0114294
ENSMUSG00000026175.13	MGI:98930	Vil1	villin 1	1.74018	1.22399e-05	8.54206e-05	0.65787	0.125341	0.279803
ENSMUSG00000026187.10	MGI:104517	Xrcc5	X-ray repair complementing defective repair in Chinese hamster cells 5	0.619873	1.36386e-06	1.28822e-05	-0.0985781	0.447469	0.644747
ENSMUSG00000026193.16	MGI:95566	Fn1	fibronectin 1	2.79047	1.95855e-13	1.83288e-11	1.07743	0.00455588	0.0247969
ENSMUSG00000026205.9	MGI:104516	Slc23a3	solute carrier family 23 (nucleobase transporters), member 3	3.07588	6.62705e-05	0.00037405	1.87385	0.00923823	0.042401
ENSMUSG00000026208.10	MGI:94885	Des	desmin	1.37249	0.000133938	0.000686593	0.281329	0.445868	0.643482
ENSMUSG00000026222.17	MGI:109561	Sp100	nuclear antigen Sp100	1.92818	1.32999e-08	2.39765e-07	1.00261	0.0033785	0.0195858
ENSMUSG00000026228.7	MGI:109323	Htr2b	5-hydroxytryptamine (serotonin) receptor 2B	6.26769	1.43626e-06	1.34824e-05	0.380257	0.810912	0.900593
ENSMUSG00000026249.11	MGI:101780	Serpine2	serine (or cysteine) peptidase inhibitor, clade E, member 2	0.898971	5.62303e-05	0.000323304	0.155683	0.485774	0.676617
ENSMUSG00000026274.12	MGI:2155936	Pask	PAS domain containing serine/threonine kinase	1.04693	6.67453e-08	9.65273e-07	0.488401	0.0136113	0.0569491
ENSMUSG00000026276.21	MGI:97298	Septin2	septin 2	0.671443	3.18684e-06	2.67841e-05	0.411111	0.00447748	0.0244643
ENSMUSG00000026317.8	MGI:1349447	Cln8	CLN8 transmembrane ER and ERGIC protein	0.59739	1.02774e-05	7.35115e-05	0.277976	0.0409129	0.127106
ENSMUSG00000026358.14	MGI:1354694	Rgs1	regulator of G-protein signaling 1	4.29688	1.92539e-08	3.30584e-07	1.56825	0.0729763	0.192202
ENSMUSG00000026360.10	MGI:1098271	Rgs2	regulator of G-protein signaling 2	1.30431	0.000100139	0.000533272	0.584421	0.0818613	0.207839
ENSMUSG00000026407.18	MGI:88294	Cacna1s	calcium channel, voltage-dependent, L type, alpha 1S subunit	4.73576	6.52366e-08	9.4695e-07	0.709983	0.41815	0.619392
ENSMUSG00000026429.10	MGI:1914446	Ube2t	ubiquitin-conjugating enzyme E2T	1.48521	1.77757e-07	2.23173e-06	0.886174	0.00332188	0.0193369
ENSMUSG00000026435.16	MGI:1922082	Slc45a3	solute carrier family 45, member 3	1.56995	0.000744554	0.00306532	0.122639	0.797305	0.89259
ENSMUSG00000026456.19	MGI:1919267	Cyb5r1	cytochrome b5 reductase 1	0.640928	0.00046473	0.00204475	0.0498787	0.785709	0.885239
ENSMUSG00000026466.17	MGI:3582693	Tor1aip1	torsin A interacting protein 1	0.592009	6.78099e-05	0.000382031	0.224591	0.132362	0.290843
ENSMUSG00000026475.8	MGI:108407	Rgs16	regulator of G-protein signaling 16	1.01002	0.00247406	0.00871178	-0.590387	0.0821859	0.208531
ENSMUSG00000026478.15	MGI:99914	Lamc1	laminin, gamma 1	0.705367	3.32438e-06	2.77741e-05	0.325235	0.0325812	0.107772
ENSMUSG00000026479.14	MGI:99913	Lamc2	laminin, gamma 2	2.40126	1.11035e-10	3.90331e-09	0.729069	0.0550845	0.157358
ENSMUSG00000026525.10	MGI:1338022	Opn3	opsin 3	1.57381	0.00260887	0.00910234	0.0818841	0.886252	0.943345
ENSMUSG00000026536.10	MGI:3041120	Ifi211	interferon activated gene 211	3.52386	9.06448e-09	1.71059e-07	1.4973	0.015918	0.0640857
ENSMUSG00000026558.14	MGI:1931744	Uck2	uridine-cytidine kinase 2	0.957639	6.12031e-11	2.37001e-09	0.161881	0.271853	0.471579
ENSMUSG00000026586.17	MGI:97712	Prrx1	paired related homeobox 1	0.971518	3.53935e-09	7.6173e-08	0.522795	0.00205654	0.0133785
ENSMUSG00000026589.15	MGI:2148802	Sec16b	SEC16 homolog B (S. cerevisiae)	1.76848	6.36992e-06	4.86798e-05	0.438368	0.284137	0.485876
ENSMUSG00000026600.13	MGI:104665	Soat1	sterol O-acyltransferase 1	0.62798	0.00015502	0.000781083	0.364331	0.0289196	0.0990432
ENSMUSG00000026627.8	MGI:1914200	Pacc1	proton activated chloride channel 1	1.0673	1.49741e-06	1.39656e-05	0.47796	0.0331431	0.109105
ENSMUSG00000026628.14	MGI:109384	Atf3	activating transcription factor 3	3.3928	1.04462e-11	5.35393e-10	1.08549	0.0327288	0.108186
ENSMUSG00000026637.15	MGI:107548	Traf5	TNF receptor-associated factor 5	1.06236	0.000206974	0.00100732	0.512813	0.0818177	0.207839
ENSMUSG00000026674.10	MGI:1345277	Ddr2	discoidin domain receptor family, member 2	1.1485	2.48197e-09	5.65845e-08	0.49796	0.0103273	0.0461743
ENSMUSG00000026676.8	MGI:1921436	Ccdc3	coiled-coil domain containing 3	1.65721	5.48588e-06	4.28692e-05	1.14042	0.00182341	0.0122278
ENSMUSG00000026678.11	MGI:1098434	Rgs5	regulator of G-protein signaling 5	0.776752	7.91292e-07	8.03006e-06	-0.00049798	0.997476	0.998744
ENSMUSG00000026726.11	MGI:1931256	Cubn	cubilin (intrinsic factor-cobalamin receptor)	2.08866	0.000152194	0.000768776	1.37639	0.00929568	0.0425915
ENSMUSG00000026727.11	MGI:103040	Rsu1	Ras suppressor protein 1	0.763359	5.6023e-06	4.36832e-05	0.457902	0.00692979	0.0341322
ENSMUSG00000026730.13	MGI:107372	Pter	phosphotriesterase related	0.882714	0.000665129	0.00278398	0.76001	0.00511614	0.0271337
ENSMUSG00000026748.14	MGI:1914698	Plxdc2	plexin domain containing 2	0.814089	0.00210291	0.00756219	0.463995	0.0802966	0.205166
ENSMUSG00000026773.20	MGI:2181202	Pfkfb3	6-phosphofructo-2-kinase/fructose-2,6-biphosphatase 3	1.01428	0.000272074	0.00127744	0.265814	0.340768	0.545051
ENSMUSG00000026785.15	MGI:2388285	Pkn3	protein kinase N3	1.28013	7.94023e-05	0.000436227	0.653035	0.049066	0.144346
ENSMUSG00000026806.16	MGI:2682639	Ddx31	DEAD/H box helicase 31	0.619865	0.00018661	0.000920129	0.0755082	0.659593	0.80506
ENSMUSG00000026814.17	MGI:95392	Eng	endoglin	1.05761	2.0908e-07	2.56854e-06	0.48944	0.0167991	0.0666226
ENSMUSG00000026832.13	MGI:2183535	Cytip	cytohesin 1 interacting protein	2.86777	3.32816e-05	0.000204798	1.0532	0.157158	0.328258
ENSMUSG00000026840.15	MGI:1344394	Lamc3	laminin gamma 3	0.836134	0.000900616	0.00361195	-0.0921566	0.715966	0.841684
ENSMUSG00000026864.14	MGI:95835	Hspa5	heat shock protein 5	0.852926	0.000800756	0.00326203	0.0597185	0.814474	0.902471
ENSMUSG00000026880.12	MGI:95403	Stom	stomatin	0.8576	0.00129765	0.00496267	0.721042	0.00716232	0.0349127
ENSMUSG00000026921.21	MGI:2449923	Egfl7	EGF-like domain 7	0.706306	4.21082e-09	8.80571e-08	0.150896	0.212865	0.401187
ENSMUSG00000026922.14	MGI:1914762	Agpat2	1-acylglycerol-3-phosphate O-acyltransferase 2 (lysophosphatidic acid acyltransferase, beta)	1.6076	3.99624e-05	0.00023988	1.11893	0.00646905	0.0324749
ENSMUSG00000026932.15	MGI:1915241	Nacc2	nucleus accumbens associated 2, BEN and BTB (POZ) domain containing	0.63742	1.05155e-07	1.41976e-06	0.370263	0.00206041	0.0133945
ENSMUSG00000026955.14	MGI:1919330	Sapcd2	suppressor APC domain containing 2	1.8613	8.40095e-08	1.17828e-06	0.979628	0.00620909	0.0314656
ENSMUSG00000026956.16	MGI:2443318	Uap1l1	UDP-N-acteylglucosamine pyrophosphorylase 1-like 1	1.31181	2.54436e-06	2.2099e-05	0.278102	0.322567	0.526609
ENSMUSG00000026958.14	MGI:1933213	Dpp7	dipeptidylpeptidase 7	0.641749	0.000169255	0.0008455	0.179905	0.294439	0.497442
ENSMUSG00000026970.17	MGI:1861774	Rbms1	RNA binding motif, single stranded interacting protein 1	1.50941	2.0177e-11	9.1296e-10	0.452347	0.0458873	0.137656
ENSMUSG00000027018.12	MGI:96013	Hat1	histone aminotransferase 1	0.764272	3.54196e-09	7.6173e-08	0.092833	0.481146	0.672748
ENSMUSG00000027078.15	MGI:1914500	Ube2l6	ubiquitin-conjugating enzyme E2L 6	1.88618	2.91144e-12	1.80207e-10	0.863463	0.00153372	0.0106783
ENSMUSG00000027082.16	MGI:1095418	Tfpi	tissue factor pathway inhibitor	1.36615	1.35313e-05	9.32235e-05	-0.17215	0.58861	0.756119
ENSMUSG00000027107.4	MGI:87885	Chrna1	cholinergic receptor, nicotinic, alpha polypeptide 1 (muscle)	2.78665	2.33829e-08	3.89525e-07	0.941176	0.0583817	0.16399
ENSMUSG00000027199.15	MGI:1914342	Gatm	glycine amidinotransferase (L-arginine:glycine amidinotransferase)	0.785467	0.000290802	0.00135609	0.361333	0.095829	0.232428
ENSMUSG00000027230.10	MGI:1347062	Creb3l1	cAMP responsive element binding protein 3-like 1	1.64216	8.16489e-05	0.000447852	0.965039	0.0222446	0.0818818
ENSMUSG00000027239.15	MGI:96949	Mdk	midkine	1.43708	5.11377e-11	2.03512e-09	0.499921	0.0245714	0.0879835
ENSMUSG00000027242.15	MGI:1926186	Wdr76	WD repeat domain 76	1.23515	9.20737e-08	1.27444e-06	0.418214	0.0776977	0.200293
ENSMUSG00000027248.14	MGI:95834	Pdia3	protein disulfide isomerase associated 3	0.877938	1.02647e-06	1.00881e-05	0.282094	0.11661	0.266147
ENSMUSG00000027293.14	MGI:1919619	Ehd4	EH-domain containing 4	1.83266	4.55589e-08	6.944e-07	0.839206	0.0128422	0.0544321
ENSMUSG00000027318.18	MGI:1341813	Adam33	a disintegrin and metallopeptidase domain 33	4.54805	5.84424e-07	6.18006e-06	0.249369	0.765342	0.872225
ENSMUSG00000027333.19	MGI:2445356	Smox	spermine oxidase	0.801554	4.4378e-07	4.86348e-06	0.403944	0.0113291	0.0495295
ENSMUSG00000027338.17	MGI:1346999	Prnd	prion like protein doppel	2.33808	0.000354714	0.00161405	1.41548	0.0511012	0.148699
ENSMUSG00000027340.16	MGI:1859682	Slc23a2	solute carrier family 23 (nucleobase transporters), member 2	0.726117	7.42917e-08	1.06153e-06	-0.0429991	0.750406	0.862728
ENSMUSG00000027342.15	MGI:97503	Pcna	proliferating cell nuclear antigen	1.07223	1.56483e-12	1.0581e-10	0.29239	0.0556698	0.158611
ENSMUSG00000027351.15	MGI:2150016	Spred1	sprouty protein with EVH-1 domain 1, related sequence	1.10537	5.96073e-17	1.65094e-14	-0.146865	0.267647	0.466998
ENSMUSG00000027358.7	MGI:88177	Bmp2	bone morphogenetic protein 2	2.5844	9.46311e-12	4.99872e-10	-0.354653	0.35643	0.559474
ENSMUSG00000027364.15	MGI:1922333	Usp50	ubiquitin specific peptidase 50	0.597329	8.51306e-07	8.54735e-06	0.238703	0.0560896	0.15941
ENSMUSG00000027381.17	MGI:1197519	Bcl2l11	BCL2-like 11 (apoptosis facilitator)	1.27696	7.32668e-05	0.000408245	0.668411	0.0400385	0.125264
ENSMUSG00000027423.16	MGI:1916428	Snx5	sorting nexin 5	0.602284	0.0020706	0.00745615	0.427726	0.0289808	0.0992181
ENSMUSG00000027435.9	MGI:106664	Cd93	CD93 antigen	1.90745	1.64611e-08	2.89336e-07	0.573892	0.0908337	0.223996
ENSMUSG00000027454.11	MGI:1916520	Gins1	GINS complex subunit 1 (Psf1 homolog)	2.08373	3.26257e-12	1.97483e-10	0.939104	0.00351884	0.0201901
ENSMUSG00000027456.9	MGI:2385156	Sdcbp2	syndecan binding protein (syntenin) 2	1.26483	0.00105518	0.00414869	-0.0638431	0.864077	0.930411
ENSMUSG00000027459.17	MGI:1921097	Fam110a	family with sequence similarity 110, member A	0.661753	0.000727275	0.00300375	0.360579	0.0698545	0.186493
ENSMUSG00000027490.18	MGI:101941	E2f1	E2F transcription factor 1	1.04331	3.71113e-08	5.80817e-07	0.5052	0.00995366	0.0448708
ENSMUSG00000027506.16	MGI:107749	Tpd52	tumor protein D52	0.64147	0.0018773	0.00684607	0.0736046	0.72195	0.845422
ENSMUSG00000027510.18	MGI:1889294	Rbm38	RNA binding motif protein 38	0.976754	0.000375485	0.0016973	0.869124	0.00292423	0.0176371
ENSMUSG00000027533.11	MGI:101790	Fabp5	fatty acid binding protein 5, epidermal	0.634199	0.00141658	0.00534506	0.614082	0.00203018	0.0132485
ENSMUSG00000027540.14	MGI:97805	Ptpn1	protein tyrosine phosphatase, non-receptor type 1	0.687391	2.07691e-05	0.000135948	0.310624	0.0551909	0.157526
ENSMUSG00000027560.5	MGI:1924079	Dok5	docking protein 5	1.169	5.90206e-09	1.17527e-07	0.348265	0.0861423	0.21555
ENSMUSG00000027580.18	MGI:2385169	Helz2	helicase with zinc finger 2, transcriptional coactivator	1.58659	1.18578e-07	1.57887e-06	0.714282	0.0180288	0.0703621
ENSMUSG00000027583.14	MGI:1919397	Zbtb46	zinc finger and BTB domain containing 46	1.47218	1.6652e-07	2.11291e-06	0.467344	0.0975816	0.235438
ENSMUSG00000027601.14	MGI:1914722	Mtfr1	mitochondrial fission regulator 1	0.677599	0.000259775	0.00122494	0.127266	0.498938	0.687217
ENSMUSG00000027639.17	MGI:1927468	Samhd1	SAM domain and HD domain, 1	0.787219	8.53427e-05	0.000465242	0.291	0.1484	0.315065
ENSMUSG00000027642.16	MGI:98085	Rpn2	ribophorin II	0.655847	1.9997e-08	3.41631e-07	0.166745	0.154776	0.324776
ENSMUSG00000027656.8	MGI:1328326	Ccn5	cellular communication network factor 5	5.0851	0.000728942	0.00300882	2.69337	0.105698	0.248779
ENSMUSG00000027671.15	MGI:1861453	Actl6a	actin-like 6A	0.704709	9.32257e-09	1.75446e-07	0.241192	0.0540629	0.155025
ENSMUSG00000027750.17	MGI:1926321	Postn	periostin, osteoblast specific factor	1.6856	0.00266955	0.00928452	-0.383052	0.506962	0.693441
ENSMUSG00000027765.7	MGI:105049	P2ry1	purinergic receptor P2Y, G-protein coupled 1	1.1877	9.40393e-05	0.000506085	0.832076	0.00816709	0.0385617
ENSMUSG00000027775.10	MGI:1914118	Mfsd1	major facilitator superfamily domain containing 1	0.874441	1.24849e-05	8.67769e-05	0.350846	0.0809059	0.206154
ENSMUSG00000027808.9	MGI:92638	Serp1	stress-associated endoplasmic reticulum protein 1	0.666912	0.0001343	0.000688319	0.226006	0.197128	0.380839
ENSMUSG00000027811.10	MGI:1923189	4930579G24Rik	RIKEN cDNA 4930579G24 gene	1.29462	6.37779e-05	0.000361545	0.470629	0.156423	0.327131
ENSMUSG00000027840.6	MGI:1261834	Wnt2b	wingless-type MMTV integration site family, member 2B	3.62488	4.14233e-06	3.35349e-05	2.02864	0.0118543	0.0512572
ENSMUSG00000027852.15	MGI:97376	Nras	neuroblastoma ras oncogene	0.706486	3.45266e-07	3.92422e-06	0.359726	0.00974316	0.0440872
ENSMUSG00000027860.16	MGI:2159344	Vangl1	VANGL planar cell polarity 1	0.818221	2.74483e-06	2.3564e-05	0.517818	0.00420538	0.0233599
ENSMUSG00000027896.16	MGI:2385183	Slc16a4	solute carrier family 16 (monocarboxylic acid transporters), member 4	0.77306	0.000192017	0.000943704	0.394879	0.0630737	0.17306
ENSMUSG00000027939.12	MGI:1924845	Nup210l	nucleoporin 210-like	1.4056	8.61308e-06	6.33505e-05	0.517824	0.102223	0.24284
ENSMUSG00000027961.8	MGI:1924557	Lrrc39	leucine rich repeat containing 39	1.66519	0.000356697	0.00162173	0.735846	0.155424	0.325824
ENSMUSG00000027962.15	MGI:98926	Vcam1	vascular cell adhesion molecule 1	1.37149	8.03826e-08	1.13665e-06	0.793419	0.00197358	0.012992
ENSMUSG00000027966.21	MGI:88446	Col11a1	collagen, type XI, alpha 1	1.6382	2.60207e-06	2.25359e-05	0.918225	0.00850286	0.0398009
ENSMUSG00000027985.15	MGI:96770	Lef1	lymphoid enhancer binding factor 1	0.649162	0.00235677	0.00835459	0.0833766	0.697969	0.830161
ENSMUSG00000028018.16	MGI:1914803	Gstcd	glutathione S-transferase, C-terminal domain containing	0.6722	6.26434e-06	4.79755e-05	0.13425	0.385192	0.58744
ENSMUSG00000028019.10	MGI:1859631	Pdgfc	platelet-derived growth factor, C polypeptide	1.0351	8.73975e-06	6.41617e-05	0.358452	0.131126	0.288734
ENSMUSG00000028042.16	MGI:102755	Zbtb7b	zinc finger and BTB domain containing 7B	1.11577	1.49881e-06	1.39739e-05	0.540215	0.0203057	0.0767081
ENSMUSG00000028048.12	MGI:95665	Gba	glucosidase, beta, acid	1.06985	5.26421e-08	7.8662e-07	0.580069	0.00332122	0.0193369
ENSMUSG00000028163.18	MGI:97312	Nfkb1	nuclear factor of kappa light polypeptide gene enhancer in B cells 1, p105	0.696951	3.51212e-05	0.000214482	0.507498	0.00281054	0.0171102
ENSMUSG00000028164.16	MGI:88175	Manba	mannosidase, beta A, lysosomal	0.747386	0.00171981	0.00634857	0.191984	0.422928	0.623282
ENSMUSG00000028173.11	MGI:1915401	Wls	wntless WNT ligand secretion mediator	0.616758	0.00279808	0.00966411	0.276054	0.18249	0.362283
ENSMUSG00000028191.12	MGI:1337994	Bcl10	B cell leukemia/lymphoma 10	0.9473	2.24732e-09	5.18263e-08	0.347005	0.0310691	0.10432
ENSMUSG00000028195.5	MGI:88613	Ccn1	cellular communication network factor 1	4.20909	3.11752e-11	1.30907e-09	2.03026	0.00147831	0.0103603
ENSMUSG00000028212.17	MGI:1329034	Ccne2	cyclin E2	1.23984	3.33246e-08	5.31566e-07	-0.296276	0.198178	0.382375
ENSMUSG00000028214.14	MGI:99844	Gem	GTP binding protein (gene overexpressed in skeletal muscle)	1.71623	7.10469e-05	0.000397411	1.0666	0.015291	0.0620649
ENSMUSG00000028312.20	MGI:106067	Smc2	structural maintenance of chromosomes 2	0.82146	5.27837e-07	5.64921e-06	0.258463	0.117802	0.26781
ENSMUSG00000028327.15	MGI:1921402	Stra6l	STRA6-like	4.71362	4.10079e-06	3.32575e-05	3.3525	0.0179343	0.0700728
ENSMUSG00000028334.11	MGI:2149820	Nans	N-acetylneuraminic acid synthase (sialic acid synthase)	0.691035	8.91106e-05	0.000482888	0.177255	0.320816	0.524741
ENSMUSG00000028367.6	MGI:98874	Txn1	thioredoxin 1	0.712596	2.21494e-12	1.42233e-10	0.295447	0.00386425	0.0217667
ENSMUSG00000028378.7	MGI:1914353	Ptgr1	prostaglandin reductase 1	1.03318	5.48884e-05	0.000316984	0.483512	0.0638063	0.174391
ENSMUSG00000028407.5	MGI:1913684	Smim27	small integral membrane protein 27	0.725432	0.000604187	0.0025681	0.419625	0.0570153	0.161203
ENSMUSG00000028463.15	MGI:2447188	Car9	carbonic anhydrase 9	3.53481	0.000143069	0.000729309	2.78481	0.00614637	0.0312069
ENSMUSG00000028542.18	MGI:95760	Slc6a9	solute carrier family 6 (neurotransmitter transporter, glycine), member 9	0.669102	0.000118764	0.000618011	0.237201	0.173153	0.350314
ENSMUSG00000028567.9	MGI:1913323	Txndc12	thioredoxin domain containing 12 (endoplasmic reticulum)	0.89564	8.24228e-07	8.32731e-06	0.317713	0.0826719	0.209455
ENSMUSG00000028587.19	MGI:1328337	Orc1	origin recognition complex, subunit 1	2.21955	9.75123e-05	0.000522122	1.10264	0.0834555	0.210808
ENSMUSG00000028600.16	MGI:2674939	Podn	podocan	2.05731	0.000105403	0.000556897	0.601869	0.249969	0.44707
ENSMUSG00000028621.18	MGI:1919657	Cyb5rl	cytochrome b5 reductase-like	0.584969	0.000502447	0.00219032	0.353771	0.039475	0.12399
ENSMUSG00000028626.6	MGI:88466	Col9a2	collagen, type IX, alpha 2	1.64771	1.48048e-05	0.000100857	1.15502	0.00278634	0.0169973
ENSMUSG00000028634.18	MGI:106589	Hivep3	human immunodeficiency virus type I enhancer binding protein 3	0.675093	6.57176e-11	2.50623e-09	0.227115	0.0285815	0.0982314
ENSMUSG00000028639.15	MGI:99146	Ybx1	Y box protein 1	0.721566	4.96819e-09	1.01587e-07	0.30553	0.0135106	0.0565768
ENSMUSG00000028643.12	MGI:1916466	Svbp	small vasohibin binding protein	0.760745	9.3797e-08	1.29633e-06	0.37377	0.00970746	0.0439778
ENSMUSG00000028645.12	MGI:95755	Slc2a1	solute carrier family 2 (facilitated glucose transporter), member 1	0.669139	0.000628498	0.00265374	0.0737928	0.706586	0.835729
ENSMUSG00000028647.14	MGI:1891750	Mycbp	MYC binding protein	0.790872	1.06685e-05	7.58019e-05	0.211312	0.244103	0.440049
ENSMUSG00000028651.13	MGI:1917118	Ppie	peptidylprolyl isomerase E (cyclophilin E)	0.795585	4.52796e-07	4.93861e-06	0.290414	0.0726934	0.191709
ENSMUSG00000028655.12	MGI:1923824	Mfsd2a	major facilitator superfamily domain containing 2A	1.25354	9.97043e-06	7.17369e-05	0.163435	0.565506	0.73823
ENSMUSG00000028671.17	MGI:1921496	Gale	galactose-4-epimerase, UDP	0.731441	7.60208e-08	1.08229e-06	0.381652	0.00547478	0.0285749
ENSMUSG00000028673.11	MGI:95593	Fuca1	fucosidase, alpha-L- 1, tissue	1.00612	5.45755e-06	4.27072e-05	0.525502	0.018003	0.0702965
ENSMUSG00000028680.15	MGI:109604	Plk3	polo like kinase 3	1.58485	2.94896e-08	4.79032e-07	0.12747	0.657897	0.803865
ENSMUSG00000028687.18	MGI:1917853	Mutyh	mutY DNA glycosylase	0.673904	0.000990494	0.0039259	0.554766	0.0104467	0.046578
ENSMUSG00000028689.15	MGI:1915644	Ccdc163	coiled-coil domain containing 163	0.88641	0.00127703	0.00489753	0.800478	0.00470321	0.0254286
ENSMUSG00000028691.13	MGI:99523	Prdx1	peroxiredoxin 1	0.846566	2.11764e-08	3.58651e-07	0.416233	0.00599156	0.0306084
ENSMUSG00000028693.16	MGI:1355328	Nasp	nuclear autoantigenic sperm protein (histone-binding)	0.596944	6.9286e-07	7.1827e-06	0.0184383	0.879932	0.939329
ENSMUSG00000028717.13	MGI:98480	Tal1	T cell acute lymphocytic leukemia 1	1.68572	1.81587e-06	1.64871e-05	0.601084	0.0980582	0.236143
ENSMUSG00000028757.5	MGI:1194508	Ddost	dolichyl-di-phosphooligosaccharide-protein glycotransferase	0.644705	7.06212e-10	1.9097e-08	0.253219	0.0159486	0.0641707
ENSMUSG00000028763.19	MGI:96257	Hspg2	perlecan (heparan sulfate proteoglycan 2)	1.51651	6.61337e-07	6.91341e-06	0.519732	0.0899294	0.222427
ENSMUSG00000028792.15	MGI:87978	Ak2	adenylate kinase 2	0.857256	2.98207e-12	1.82927e-10	0.343602	0.00587895	0.0302
ENSMUSG00000028804.21	MGI:2386401	Csmd2	CUB and Sushi multiple domains 2	0.726811	3.49807e-06	2.89475e-05	0.376868	0.0162055	0.0649543
ENSMUSG00000028883.20	MGI:107558	Sema3a	sema domain, immunoglobulin domain (Ig), short basic domain, secreted, (semaphorin) 3A	1.94858	0.000356425	0.00162076	0.444778	0.419888	0.620858
ENSMUSG00000028896.14	MGI:1913989	Rcc1	regulator of chromosome condensation 1	0.754109	1.63331e-09	3.90797e-08	0.304837	0.0172002	0.0679233
ENSMUSG00000028955.4	MGI:1321389	Vamp3	vesicle-associated membrane protein 3	0.734244	0.000100084	0.000533185	0.366586	0.0530411	0.15297
ENSMUSG00000028961.16	MGI:97553	Pgd	phosphogluconate dehydrogenase	1.00867	4.10932e-09	8.6343e-08	0.475772	0.00586061	0.0301315
ENSMUSG00000028970.10	MGI:97568	Abcb1b	ATP-binding cassette, sub-family B (MDR/TAP), member 1B	0.646123	0.00123902	0.00477295	-0.0028335	0.988841	0.995383
ENSMUSG00000028977.18	MGI:1196251	Casz1	castor zinc finger 1	1.41387	0.000251976	0.00119412	-0.136129	0.728393	0.849015
ENSMUSG00000028978.13	MGI:97362	Nos3	nitric oxide synthase 3, endothelial cell	0.675119	0.00263146	0.00916716	0.120881	0.593148	0.75915
ENSMUSG00000028980.15	MGI:2140356	H6pd	hexose-6-phosphate dehydrogenase (glucose 1-dehydrogenase)	0.935984	2.99031e-05	0.000186496	0.580235	0.0106494	0.0472279
ENSMUSG00000029082.18	MGI:105370	Bst1	bone marrow stromal cell antigen 1	3.48353	9.96576e-07	9.82954e-06	1.63557	0.0289972	0.0992181
ENSMUSG00000029093.15	MGI:1932289	Sorcs2	sortilin-related VPS10 domain containing receptor 2	0.890276	0.000409142	0.00183072	0.0961008	0.703182	0.833425
ENSMUSG00000029134.15	MGI:1922406	Plb1	phospholipase B1	2.09248	2.37838e-05	0.000153375	0.751612	0.130395	0.287694
ENSMUSG00000029135.11	MGI:102858	Fosl2	fos-like antigen 2	2.21742	4.94304e-07	5.34036e-06	0.658099	0.135701	0.296015
ENSMUSG00000029161.9	MGI:1915817	Cgref1	cell growth regulator with EF hand domain 1	0.99491	1.53915e-05	0.000104594	0.173876	0.450699	0.647345
ENSMUSG00000029171.13	MGI:97564	Pgm2	phosphoglucomutase 2	0.954968	2.95835e-08	4.80272e-07	0.460496	0.00886585	0.0410894
ENSMUSG00000029177.10	MGI:88375	Cenpa	centromere protein A	1.67184	2.27145e-05	0.000147451	1.25266	0.00185547	0.0123841
ENSMUSG00000029185.15	MGI:1915553	Fam114a1	family with sequence similarity 114, member A1	1.54087	4.6507e-08	7.06885e-07	0.726314	0.0107445	0.0475706
ENSMUSG00000029186.13	MGI:1914323	Pi4k2b	phosphatidylinositol 4-kinase type 2 beta	1.16095	1.92659e-05	0.000127233	0.113618	0.684722	0.822579
ENSMUSG00000029207.17	MGI:108405	Apbb2	amyloid beta (A4) precursor protein-binding, family B, member 2	0.592258	0.000125066	0.000645818	0.000921007	0.995253	0.998159
ENSMUSG00000029219.11	MGI:3606480	Slc10a4	solute carrier family 10 (sodium/bile acid cotransporter family), member 4	1.74066	0.000285502	0.00133387	1.31944	0.0111288	0.0489027
ENSMUSG00000029231.16	MGI:97530	Pdgfra	platelet derived growth factor receptor, alpha polypeptide	0.975201	6.22548e-06	4.7749e-05	-0.13807	0.523054	0.705534
ENSMUSG00000029249.16	MGI:104897	Rest	RE1-silencing transcription factor	0.913768	3.57931e-06	2.95172e-05	0.558457	0.0054226	0.0283587
ENSMUSG00000029298.16	MGI:3605620	Gbp9	guanylate-binding protein 9	1.16359	3.17328e-05	0.000196281	0.571821	0.043903	0.133621
ENSMUSG00000029299.15	MGI:1351624	Abcg3	ATP binding cassette subfamily G member 3	1.89097	0.00101542	0.00400903	0.743583	0.211157	0.399058
ENSMUSG00000029313.19	MGI:1100819	Aff1	AF4/FMR2 family, member 1	0.875545	2.87238e-09	6.36192e-08	0.0526068	0.723287	0.845854
ENSMUSG00000029321.2	MGI:1923000	Slc10a6	solute carrier family 10 (sodium/bile acid cotransporter family), member 6	4.64864	0.000320412	0.00147559	0.29087	0.850646
ENSMUSG00000029322.13	MGI:2445289	Plac8	placenta-specific 8	4.20009	5.4778e-05	0.00031648	2.99135	0.00608004	0.0309749
ENSMUSG00000029338.14	MGI:1919164	Antxr2	anthrax toxin receptor 2	1.24157	0.000209709	0.00101936	-0.042059	0.90287	0.951596
ENSMUSG00000029360.4	MGI:3704256	Gm9754	predicted gene 9754	1.37708	0.00212859	0.0076385	1.35748	0.00290909	0.017581
ENSMUSG00000029373.8	MGI:1888711	Pf4	platelet factor 4	2.00432	6.52101e-05	0.000368672	0.302436	0.598222	0.761993
ENSMUSG00000029378.6	MGI:88068	Areg	amphiregulin	5.37992	5.48109e-07	5.8502e-06	-0.71689	0.54645	0.723211
ENSMUSG00000029380.12	MGI:108068	Cxcl1	chemokine (C-X-C motif) ligand 1	2.37455	0.00101244	0.00400131	1.04182	0.317791	0.52136
ENSMUSG00000029394.12	MGI:1202069	Cdk2ap1	CDK2 (cyclin-dependent kinase 2)-associated protein 1	0.704824	2.19324e-09	5.07928e-08	0.236002	0.0476194	0.14111
ENSMUSG00000029414.12	MGI:2673709	Kntc1	kinetochore associated 1	1.5716	6.77701e-11	2.5702e-09	0.593127	0.0178228	0.0697392
ENSMUSG00000029426.9	MGI:1196458	Scarb2	scavenger receptor class B, member 2	0.669203	1.1904e-06	1.14892e-05	0.409901	0.00296917	0.0178276
ENSMUSG00000029470.16	MGI:1338859	P2rx4	purinergic receptor P2X, ligand-gated ion channel 4	1.29403	5.27376e-06	4.14583e-05	0.645578	0.0241991	0.0869481
ENSMUSG00000029491.8	MGI:97525	Pde6b	phosphodiesterase 6B, cGMP, rod receptor, beta polypeptide	3.71712	3.68876e-09	7.87739e-08	1.6087	0.00699649	0.0343621
ENSMUSG00000029521.8	MGI:1355321	Chek2	checkpoint kinase 2	1.4939	4.97089e-07	5.3641e-06	0.477987	0.113641	0.261511
ENSMUSG00000029560.13	MGI:2443816	Snx8	sorting nexin 8	0.930405	3.58053e-05	0.000218013	0.301942	0.184383	0.364753
ENSMUSG00000029581.15	MGI:1352745	Fscn1	fascin actin-bundling protein 1	0.737769	5.15978e-07	5.54393e-06	0.34016	0.020799	0.0780929
ENSMUSG00000029591.15	MGI:109352	Ung	uracil DNA glycosylase	1.08235	0.000572958	0.00245132	0.462073	0.155918	0.326453
ENSMUSG00000029616.10	MGI:1914647	Erp29	endoplasmic reticulum protein 29	0.649152	5.13131e-07	5.51551e-06	0.270878	0.0367201	0.117815
ENSMUSG00000029641.9	MGI:1916145	Rasl11a	RAS-like, family 11, member A	1.42615	2.4231e-05	0.00015571	-0.479948	0.15827	0.329748
ENSMUSG00000029661.17	MGI:88468	Col1a2	collagen, type I, alpha 2	2.00885	1.80491e-05	0.000120386	0.795967	0.0905046	0.223482
ENSMUSG00000029664.11	MGI:108543	Tfpi2	tissue factor pathway inhibitor 2	5.09285	1.12899e-05	7.96061e-05	1.3343	0.257245	0.455642
ENSMUSG00000029675.13	MGI:95317	Eln	elastin	1.81672	5.87233e-05	0.000335947	0.413815	0.361437	0.564497
ENSMUSG00000029710.16	MGI:104757	Ephb4	Eph receptor B4	1.08562	1.26187e-06	1.20854e-05	0.0882322	0.698423	0.830423
ENSMUSG00000029718.15	MGI:105099	Pcolce	procollagen C-endopeptidase enhancer protein	1.44349	0.000259336	0.00122371	1.08573	0.00629625	0.0318268
ENSMUSG00000029725.11	MGI:1922853	Ppp1r35	protein phosphatase 1, regulatory subunit 35	0.648166	0.00031219	0.00144298	0.408784	0.0286002	0.0982533
ENSMUSG00000029761.17	MGI:88250	Cald1	caldesmon 1	0.711777	2.40817e-06	2.10561e-05	0.234069	0.122495	0.2753
ENSMUSG00000029767.17	MGI:1097158	Calu	calumenin	1.18422	2.33082e-11	1.02917e-09	0.51973	0.00340544	0.0196851
ENSMUSG00000029781.8	MGI:1350921	Fkbp9	FK506 binding protein 9	0.845209	5.44192e-06	4.26214e-05	0.422169	0.0236571	0.0855378
ENSMUSG00000029814.11	MGI:1890359	Igf2bp3	insulin-like growth factor 2 mRNA binding protein 3	4.23316	0.00025808	0.00121841	2.04446	0.0911014	0.224432
ENSMUSG00000029822.16	MGI:1918970	Osbpl3	oxysterol binding protein-like 3	1.09446	0.000332783	0.00152667	-0.364427	0.234964	0.428952
ENSMUSG00000029860.17	MGI:103072	Zyx	zyxin	0.784823	0.00143552	0.00540836	-0.0995558	0.686781	0.823815
ENSMUSG00000029910.15	MGI:1860374	Mad2l1	MAD2 mitotic arrest deficient-like 1	0.941	3.0634e-09	6.70914e-08	0.290161	0.0722444	0.190944
ENSMUSG00000029915.15	MGI:1345151	Clec5a	C-type lectin domain family 5, member a	1.83719	4.08012e-06	3.31291e-05	1.06083	0.00919562	0.0422538
ENSMUSG00000030043.12	MGI:98475	Tacr1	tachykinin receptor 1	1.48892	0.000352833	0.00160697	0.66152	0.109133	0.254477
ENSMUSG00000030082.15	MGI:1858417	Sec61a1	Sec61 alpha 1 subunit (S. cerevisiae)	0.69073	2.50986e-10	7.81304e-09	0.249391	0.022953	0.0837611
ENSMUSG00000030089.16	MGI:1918949	Slc41a3	solute carrier family 41, member 3	1.15697	4.03286e-05	0.000241707	0.48817	0.0836894	0.211253
ENSMUSG00000030104.10	MGI:2180139	Edem1	ER degradation enhancer, mannosidase alpha-like 1	1.65994	5.29222e-10	1.48833e-08	0.837479	0.00181161	0.0121656
ENSMUSG00000030156.6	MGI:88343	Cd69	CD69 antigen	4.88176	0.00142118	0.00535875	3.24387	0.0385306	0.121867
ENSMUSG00000030157.6	MGI:2135589	Clec2d	C-type lectin domain family 2, member d	1.15119	8.83357e-06	6.47984e-05	0.53941	0.0392707	0.123526
ENSMUSG00000030162.15	MGI:1261434	Olr1	oxidized low density lipoprotein (lectin-like) receptor 1	3.60765	6.25054e-05	0.00035536	2.94488	0.00640761	0.0322454
ENSMUSG00000030168.14	MGI:93830	Adipor2	adiponectin receptor 2	0.623615	7.33455e-05	0.000408435	0.236333	0.133906	0.293084
ENSMUSG00000030170.15	MGI:98959	Wnt5b	wingless-type MMTV integration site family, member 5B	1.26652	9.78439e-05	0.000523308	-0.0169693	0.95943	0.980933
ENSMUSG00000030187.16	MGI:101906	Klra2	killer cell lectin-like receptor, subfamily A, member 2	1.84609	0.00127986	0.00490477	0.444612	0.510676	0.696053
ENSMUSG00000030199.17	MGI:109336	Etv6	ets variant 6	1.1209	1.52756e-06	1.42034e-05	0.326216	0.16469	0.338229
ENSMUSG00000030214.8	MGI:1914107	Plbd1	phospholipase B domain containing 1	4.84178	1.12751e-07	1.50959e-06	1.84662	0.0950913	0.23121
ENSMUSG00000030218.3	MGI:96976	Mgp	matrix Gla protein	2.05205	6.47212e-06	4.93234e-05	0.561428	0.218503	0.407854
ENSMUSG00000030247.10	MGI:1100508	Kcnj8	potassium inwardly-rectifying channel, subfamily J, member 8	0.914954	0.000340054	0.00155534	0.40416	0.125426	0.279866
ENSMUSG00000030249.16	MGI:1352630	Abcc9	ATP-binding cassette, sub-family C (CFTR/MRP), member 9	1.20763	8.99909e-08	1.24876e-06	0.197533	0.385278	0.587534
ENSMUSG00000030317.9	MGI:109125	Timp4	tissue inhibitor of metalloproteinase 4	1.01454	4.83116e-13	4.01426e-11	0.309885	0.0284277	0.0978567
ENSMUSG00000030365.12	MGI:2136650	Clec2i	C-type lectin domain family 2, member i	2.82451	0.00286566	0.00986645	2.18365	0.0432045	0.132164
ENSMUSG00000030427.18	MGI:1195969	Lilra6	leukocyte immunoglobulin-like receptor, subfamily A (with TM domain), member 6	3.14797	0.000291568	0.00135897	2.08205	0.029941	0.101382
ENSMUSG00000030450.12	MGI:97454	Oca2	oculocutaneous albinism II	1.46151	0.00271153	0.00940428	-0.473245	0.371335	0.574691
ENSMUSG00000030493.14	MGI:2142208	Faap24	Fanconi anemia core complex associated protein 24	0.642773	2.86251e-05	0.000179775	0.289618	0.0716484	0.189793
ENSMUSG00000030523.19	MGI:1330305	Trpm1	transient receptor potential cation channel, subfamily M, member 1	2.23179	0.000255422	0.00120823	1.34464	0.0529351	0.152715
ENSMUSG00000030528.13	MGI:1328362	Blm	Bloom syndrome, RecQ like helicase	0.74002	0.000207317	0.00100863	-0.0477937	0.816999	0.903704
ENSMUSG00000030530.16	MGI:97513	Furin	furin (paired basic amino acid cleaving enzyme)	1.08755	8.30921e-13	6.31132e-11	0.304344	0.0466932	0.139284
ENSMUSG00000030541.17	MGI:96414	Idh2	isocitrate dehydrogenase 2 (NADP+), mitochondrial	0.743526	4.64222e-06	3.71215e-05	0.516023	0.00153011	0.0106624
ENSMUSG00000030549.7	MGI:1888517	Rhcg	Rhesus blood group-associated C glycoprotein	2.86035	6.58406e-05	0.00037193	0.106794	0.882728	0.940844
ENSMUSG00000030562.18	MGI:1354184	Nox4	NADPH oxidase 4	3.44954	6.96561e-06	5.26888e-05	1.04621	0.227394	0.419167
ENSMUSG00000030589.16	MGI:2386851	Rasgrp4	RAS guanyl releasing protein 4	1.1312	0.00074025	0.00305136	0.35855	0.306469	0.509777
ENSMUSG00000030606.9	MGI:1914916	Hapln3	hyaluronan and proteoglycan link protein 3	1.42485	3.55943e-05	0.000216984	0.711044	0.0350057	0.113619
ENSMUSG00000030607.8	MGI:99602	Acan	aggrecan	3.99632	3.4234e-11	1.42659e-09	0.92464	0.126129	0.280818
ENSMUSG00000030641.11	MGI:1921291	Ddias	DNA damage-induced apoptosis suppressor	1.72473	4.36601e-07	4.79439e-06	0.608593	0.0941606	0.229493
ENSMUSG00000030669.14	MGI:2151253	Calca	calcitonin/calcitonin-related polypeptide, alpha	3.29734	8.73907e-08	1.21823e-06	1.1124	0.0570432	0.161262
ENSMUSG00000030720.17	MGI:107537	Cln3	ceroid lipofuscinosis, neuronal 3, juvenile (Batten, Spielmeyer-Vogt disease)	0.600308	0.00205948	0.00742355	0.355362	0.0703865	0.187397
ENSMUSG00000030761.17	MGI:104510	Myo7a	myosin VIIA	0.778096	1.32602e-08	2.39207e-07	0.420904	0.00226575	0.0144653
ENSMUSG00000030782.18	MGI:102784	Tgfb1i1	transforming growth factor beta 1 induced transcript 1	1.89794	1.25956e-08	2.28723e-07	0.221665	0.509521	0.695186
ENSMUSG00000030790.16	MGI:108058	Adm	adrenomedullin	2.14238	5.32864e-06	4.18177e-05	1.09577	0.0193824	0.0742704
ENSMUSG00000030796.18	MGI:104904	Tead2	TEA domain family member 2	1.14505	8.73745e-06	6.41617e-05	0.540739	0.0393295	0.12363
ENSMUSG00000030804.9	MGI:5439443	Gm21974	predicted gene 21974	0.69111	1.74191e-05	0.000116694	0.148223	0.36869	0.571961
ENSMUSG00000030830.19	MGI:96606	Itgal	integrin alpha L	3.41155	4.97947e-08	7.53101e-07	0.629895	0.341011	0.545096
ENSMUSG00000030854.18	MGI:97807	Ptpn5	protein tyrosine phosphatase, non-receptor type 5	1.36927	2.99058e-10	9.08104e-09	0.614247	0.00472616	0.0255043
ENSMUSG00000030878.12	MGI:1100885	Cdr2	cerebellar degeneration-related 2	0.85473	0.00224996	0.00802785	0.134944	0.634665	0.788363
ENSMUSG00000030894.6	MGI:1336194	Tpp1	tripeptidyl peptidase I	0.83408	1.99856e-07	2.46849e-06	0.441634	0.00601258	0.0306831
ENSMUSG00000030954.12	MGI:1914383	Gp2	glycoprotein 2 (zymogen granule membrane)	4.56669	0.000482494	0.00211308	3.41714	0.00641729
ENSMUSG00000031015.9	MGI:1298390	Swap70	SWA-70 protein	0.878466	5.57652e-05	0.000321506	0.367895	0.0950663	0.231208
ENSMUSG00000031023.6	MGI:3041226	Akip1	A kinase (PRKA) interacting protein 1	1.09892	1.73284e-05	0.000116201	0.649678	0.0144123	0.0592658
ENSMUSG00000031070.16	MGI:2384823	Mrgprf	MAS-related GPR, member F	1.87021	0.00215692	0.00772807	2.06394	0.00167458	0.0114306
ENSMUSG00000031074.15	MGI:95517	Fgf3	fibroblast growth factor 3	4.64226	0.00128285	0.00491486	1.11854	0.405072	0.606902
ENSMUSG00000031077.8	MGI:109324	Fadd	Fas (TNFRSF6)-associated via death domain	1.31792	1.34029e-06	1.26946e-05	0.568713	0.0435695	0.132919
ENSMUSG00000031097.16	MGI:105070	Tnni2	troponin I, skeletal, fast 2	2.44786	0.000338425	0.00154893	1.40225	0.0552348	0.157596
ENSMUSG00000031098.19	MGI:1859867	Syt8	synaptotagmin VIII	4.86636	0.000137885	0.000705113	1.15317	0.398937
ENSMUSG00000031145.16	MGI:1859635	Prickle3	prickle planar cell polarity protein 3	0.995297	0.00172011	0.00634883	0.208059	0.524709	0.706854
ENSMUSG00000031266.8	MGI:1347344	Gla	galactosidase, alpha	1.49706	7.97183e-09	1.53287e-07	0.400822	0.124727	0.278857
ENSMUSG00000031304.19	MGI:96551	Il2rg	interleukin 2 receptor, gamma chain	2.81959	2.06928e-09	4.8289e-08	0.912796	0.0587328	0.164703
ENSMUSG00000031365.14	MGI:1350985	Zfp275	zinc finger protein 275	1.35293	8.58644e-06	6.31884e-05	0.0483144	0.874178	0.935879
ENSMUSG00000031371.15	MGI:1920988	Haus7	HAUS augmin-like complex, subunit 7	0.89172	1.24761e-07	1.64725e-06	0.413388	0.016633	0.0661278
ENSMUSG00000031382.15	MGI:1916104	Asb11	ankyrin repeat and SOCS box-containing 11	1.89524	0.00118008	0.00458003	-0.635691	0.285796	0.48788
ENSMUSG00000031434.16	MGI:1922996	Morc4	microrchidia 4	0.695093	0.000252693	0.00119651	-0.0423964	0.826542	0.909112
ENSMUSG00000031438.12	MGI:1914139	Rnf128	ring finger protein 128	0.913766	5.26372e-05	0.000305463	-0.245806	0.277602	0.478275
ENSMUSG00000031443.8	MGI:109325	F7	coagulation factor VII	3.79528	1.79949e-06	1.63595e-05	0.845192	0.339175	0.543317
ENSMUSG00000031444.17	MGI:103107	F10	coagulation factor X	5.28844	3.89152e-05	0.000234356	3.10633	0.0271176	0.0943601
ENSMUSG00000031447.8	MGI:96745	Lamp1	lysosomal-associated membrane protein 1	0.833375	2.42817e-05	0.000155962	0.511024	0.00967292	0.0438933
ENSMUSG00000031451.7	MGI:95660	Gas6	growth arrest specific 6	0.945237	9.67461e-05	0.00051883	0.0521144	0.830021	0.910792
ENSMUSG00000031453.17	MGI:1197013	Rasa3	RAS p21 protein activator 3	0.607652	1.60635e-05	0.000108595	0.297671	0.0352354	0.114135
ENSMUSG00000031465.7	MGI:1202890	Angpt2	angiopoietin 2	1.69856	0.000100915	0.000536779	0.951998	0.0335233	0.110025
ENSMUSG00000031480.16	MGI:1929096	Thsd1	thrombospondin, type I, domain 1	0.68998	0.00173891	0.00640873	0.187262	0.40461	0.606701
ENSMUSG00000031493.11	MGI:2181461	Ggn	gametogenetin	1.61665	8.55335e-08	1.19599e-06	0.544895	0.0849789	0.213678
ENSMUSG00000031502.12	MGI:88454	Col4a1	collagen, type IV, alpha 1	1.46349	8.06107e-09	1.54462e-07	0.601745	0.0178324	0.0697542
ENSMUSG00000031503.14	MGI:88455	Col4a2	collagen, type IV, alpha 2	0.706259	0.000236097	0.00112744	0.464118	0.0157355	0.0634976
ENSMUSG00000031506.12	MGI:2156893	Ptpn7	protein tyrosine phosphatase, non-receptor type 7	7.20936	4.28451e-08	6.58897e-07	1.98254	0.109275	0.25469
ENSMUSG00000031510.6	MGI:1920868	1700128E19Rik	RIKEN cDNA 1700128E19 gene	4.41624	0.00236139	0.00836879	0.884597	0.593532
ENSMUSG00000031521.6	MGI:104873	Aga	aspartylglucosaminidase	1.22858	2.04687e-08	3.48603e-07	0.694718	0.00190285	0.0126121
ENSMUSG00000031530.7	MGI:2442191	Dusp4	dual specificity phosphatase 4	1.18223	0.00113655	0.00442988	0.0320617	0.929876	0.966041
ENSMUSG00000031555.16	MGI:105376	Adam9	a disintegrin and metallopeptidase domain 9 (meltrin gamma)	0.73673	9.3795e-06	6.82734e-05	0.280854	0.0921315	0.22606
ENSMUSG00000031565.19	MGI:95522	Fgfr1	fibroblast growth factor receptor 1	0.668754	1.476e-07	1.90188e-06	0.0843116	0.508211	0.694554
ENSMUSG00000031584.17	MGI:95804	Gsr	glutathione reductase	0.722999	3.68431e-14	4.61984e-12	0.145362	0.134037	0.293211
ENSMUSG00000031591.15	MGI:1277124	Asah1	N-acylsphingosine amidohydrolase 1	1.02412	1.45591e-06	1.36389e-05	0.622684	0.00347513	0.0199967
ENSMUSG00000031596.16	MGI:99828	Slc7a2	solute carrier family 7 (cationic amino acid transporter, y+ system), member 2	0.682771	0.000743566	0.00306227	0.233372	0.250296	0.447373
ENSMUSG00000031608.14	MGI:1349449	Galnt7	polypeptide N-acetylgalactosaminyltransferase 7	0.964051	8.70415e-07	8.72005e-06	0.419183	0.0339871	0.111122
ENSMUSG00000031609.4	MGI:1929129	Sap30	sin3 associated polypeptide	0.632443	0.00219947	0.00786097	-0.0422339	0.841444	0.917089
ENSMUSG00000031628.10	MGI:107739	Casp3	caspase 3	0.945094	1.77842e-07	2.23177e-06	0.530554	0.00386338	0.0217667
ENSMUSG00000031639.13	MGI:2156367	Tlr3	toll-like receptor 3	0.723221	1.01478e-05	7.27458e-05	0.371356	0.0248506	0.0886434
ENSMUSG00000031684.12	MGI:1924025	Slc10a7	solute carrier family 10 (sodium/bile acid cotransporter family), member 7	0.815981	0.000280226	0.001311	0.34944	0.124996	0.279278
ENSMUSG00000031734.14	MGI:1197522	Irx3	Iroquois related homeobox 3	3.72254	0.0022163	0.00791884	-0.559769	0.65514
ENSMUSG00000031756.6	MGI:1919405	Cenpn	centromere protein N	2.0627	2.44045e-10	7.63895e-09	1.07429	0.00189231	0.0125693
ENSMUSG00000031758.11	MGI:1923046	Cdyl2	chromodomain protein, Y chromosome-like 2	0.9408	1.1685e-05	8.20491e-05	0.420501	0.0529236	0.152705
ENSMUSG00000031789.18	MGI:2664102	Cngb1	cyclic nucleotide gated channel beta 1	1.43787	0.00213954	0.00767179	0.833798	0.0822287	0.208574
ENSMUSG00000031790.9	MGI:109320	Mmp15	matrix metallopeptidase 15	1.12913	2.24604e-08	3.76675e-07	0.173586	0.392334	0.594747
ENSMUSG00000031792.16	MGI:2142454	Usb1	U6 snRNA biogenesis 1	0.607026	0.000378454	0.00170846	0.171946	0.325302	0.529454
ENSMUSG00000031803.9	MGI:2152535	B3gnt3	UDP-GlcNAc:betaGal beta-1,3-N-acetylglucosaminyltransferase 3	1.64341	3.39998e-07	3.87157e-06	0.713761	0.0324807	0.107602
ENSMUSG00000031821.12	MGI:1921019	Gins2	GINS complex subunit 2 (Psf2 homolog)	1.7017	1.67571e-10	5.46905e-09	0.491772	0.0762616	0.197731
ENSMUSG00000031825.17	MGI:1926142	Crispld2	cysteine-rich secretory protein LCCL domain containing 2	1.96123	1.93836e-07	2.40715e-06	0.915658	0.017391	0.0684353
ENSMUSG00000031827.14	MGI:1919292	Cotl1	coactosin-like 1 (Dictyostelium)	1.45025	3.10879e-08	5.01724e-07	0.691737	0.00837415	0.0393209
ENSMUSG00000031861.17	MGI:1858422	Lpar2	lysophosphatidic acid receptor 2	1.43196	9.84543e-06	7.10238e-05	0.919251	0.00563521	0.0292037
ENSMUSG00000031871.10	MGI:105057	Cdh5	cadherin 5	1.12835	3.42154e-08	5.4356e-07	0.184625	0.371029	0.574582
ENSMUSG00000031875.8	MGI:2447162	Cmtm3	CKLF-like MARVEL transmembrane domain containing 3	1.68593	5.51986e-08	8.18133e-07	0.974687	0.00182659	0.0122389
ENSMUSG00000031885.15	MGI:99851	Cbfb	core binding factor beta	1.09978	6.35775e-12	3.52894e-10	0.0930779	0.565264	0.738039
ENSMUSG00000031903.8	MGI:2178076	Pla2g15	phospholipase A2, group XV	0.943712	0.00010148	0.000539365	0.453153	0.0629007	0.172783
ENSMUSG00000031958.17	MGI:106428	Ldhd	lactate dehydrogenase D	0.604339	0.00290936	0.00999308	-0.0978942	0.630982	0.785493
ENSMUSG00000031990.16	MGI:1933825	Jam3	junction adhesion molecule 3	0.656611	7.84624e-05	0.000431929	0.271163	0.104594	0.246961
ENSMUSG00000032000.18	MGI:1197007	Birc3	baculoviral IAP repeat-containing 3	1.3227	2.88637e-05	0.000180984	0.891924	0.00565568	0.0292909
ENSMUSG00000032014.7	MGI:94852	Oaf	out at first homolog	1.33818	1.45454e-12	9.98196e-11	0.516355	0.00698664	0.0343348
ENSMUSG00000032034.7	MGI:104755	Kcnj5	potassium inwardly-rectifying channel, subfamily J, member 5	1.30117	0.00109372	0.00427937	0.288202	0.521583	0.70455
ENSMUSG00000032035.17	MGI:95455	Ets1	E26 avian leukemia oncogene 1, 5' domain	0.698822	0.000857794	0.00346351	0.14663	0.48719	0.678005
ENSMUSG00000032058.15	MGI:1920949	Ppp2r1b	protein phosphatase 2, regulatory subunit A, beta	0.692119	2.68643e-06	2.31423e-05	0.224302	0.133795	0.292884
ENSMUSG00000032060.11	MGI:88516	Cryab	crystallin, alpha B	1.01778	2.84114e-08	4.62614e-07	0.564028	0.00215809	0.0138872
ENSMUSG00000032068.15	MGI:1923759	Plet1	placenta expressed transcript 1	2.36596	0.000536679	0.00231853	0.330359	0.634339	0.788161
ENSMUSG00000032085.6	MGI:106012	Tagln	transgelin	2.99085	2.2872e-11	1.01317e-09	0.595374	0.185911	0.366502
ENSMUSG00000032092.6	MGI:1289160	Mpzl2	myelin protein zero-like 2	1.91367	0.000715778	0.00296297	0.361801	0.523093	0.705546
ENSMUSG00000032113.17	MGI:1202065	Chek1	checkpoint kinase 1	1.53926	1.86877e-07	2.33235e-06	0.710894	0.019927	0.075622
ENSMUSG00000032116.19	MGI:105124	Stt3a	STT3, subunit of the oligosaccharyltransferase complex, homolog A (S. cerevisiae)	0.659625	2.88723e-06	2.46092e-05	-0.0128046	0.927973	0.965274
ENSMUSG00000032125.22	MGI:1921394	Robo4	roundabout guidance receptor 4	0.771388	2.01998e-06	1.81065e-05	0.159924	0.333013	0.537134
ENSMUSG00000032172.9	MGI:3045350	Olfm2	olfactomedin 2	1.66318	2.77905e-07	3.27045e-06	0.927761	0.0041677	0.023206
ENSMUSG00000032198.10	MGI:1914789	Dock6	dedicator of cytokinesis 6	0.600033	0.00106341	0.00417567	0.38361	0.0367524	0.117872
ENSMUSG00000032204.14	MGI:1891066	Aqp9	aquaporin 9	0.949074	0.000502337	0.00219019	-0.0571237	0.843579	0.918495
ENSMUSG00000032220.11	MGI:106621	Myo1e	myosin IE	2.31448	3.22781e-09	7.02991e-08	1.07934	0.00610545	0.0310582
ENSMUSG00000032221.15	MGI:107933	Mns1	meiosis-specific nuclear structural protein 1	0.666588	0.000672934	0.00281193	0.623526	0.00237873	0.0150492
ENSMUSG00000032232.15	MGI:1915428	Cgnl1	cingulin-like 1	0.687686	0.000421078	0.00187678	0.236073	0.228454	0.420702
ENSMUSG00000032312.8	MGI:88537	Csk	c-src tyrosine kinase	0.963158	2.30687e-06	2.03129e-05	0.629537	0.00213795	0.0137834
ENSMUSG00000032332.18	MGI:88448	Col12a1	collagen, type XII, alpha 1	3.26833	3.39746e-08	5.40361e-07	-0.13971	0.813683	0.902179
ENSMUSG00000032338.10	MGI:1298209	Hcn4	hyperpolarization-activated, cyclic nucleotide-gated K+ 4	1.4524	3.19214e-06	2.68081e-05	-0.0114942	0.971631	0.987028
ENSMUSG00000032344.18	MGI:2442261	Cgas	cyclic GMP-AMP synthase	0.939784	0.000210218	0.00102093	0.579436	0.0298936	0.101279
ENSMUSG00000032353.10	MGI:1913361	Tmed3	transmembrane p24 trafficking protein 3	1.21765	3.54101e-08	5.58657e-07	0.560245	0.0116416	0.0505828
ENSMUSG00000032363.16	MGI:1347346	Adamts7	a disintegrin-like and metallopeptidase (reprolysin type) with thrombospondin type 1 motif, 7	1.54547	0.00118071	0.0045818	1.17816	0.0263388	0.0924259
ENSMUSG00000032369.14	MGI:893575	Plscr1	phospholipid scramblase 1	1.41625	9.14622e-07	9.09976e-06	0.530011	0.0808695	0.206105
ENSMUSG00000032373.16	MGI:1923709	Car12	carbonic anhydrase 12	1.4262	3.27936e-06	2.74649e-05	0.919444	0.00269585	0.016563
ENSMUSG00000032381.6	MGI:1915500	Ciao2a	cytosolic iron-sulfur assembly component 2A	0.782782	8.11287e-08	1.14549e-06	0.277536	0.0601892	0.167374
ENSMUSG00000032383.8	MGI:97750	Ppib	peptidylprolyl isomerase B	0.645345	3.88653e-12	2.28688e-10	0.237435	0.0108815	0.0480681
ENSMUSG00000032387.16	MGI:1919223	Rbpms2	RNA binding protein with multiple splicing 2	0.646093	0.00151083	0.00565632	0.541369	0.00777275	0.0371132
ENSMUSG00000032412.9	MGI:107788	Atp1b3	ATPase, Na+/K+ transporting, beta 3 polypeptide	0.702515	3.48714e-06	2.88875e-05	0.320092	0.0349306	0.113467
ENSMUSG00000032431.7	MGI:1891221	Crtap	cartilage associated protein	1.6642	2.09937e-10	6.6472e-09	0.53427	0.0453396	0.13649
ENSMUSG00000032456.14	MGI:1921330	Nmnat3	nicotinamide nucleotide adenylyltransferase 3	0.805007	0.00213607	0.00766137	0.749733	0.00660105	0.0329244
ENSMUSG00000032477.15	MGI:103198	Cdc25a	cell division cycle 25A	0.774445	1.61954e-05	0.000109325	-0.0158768	0.930952	0.966783
ENSMUSG00000032478.15	MGI:1861676	Nme6	NME/NM23 nucleoside diphosphate kinase 6	0.60371	0.000125747	0.000648745	0.339378	0.0380124	0.120678
ENSMUSG00000032487.9	MGI:97798	Ptgs2	prostaglandin-endoperoxide synthase 2	1.73554	7.49817e-07	7.68023e-06	-0.0454347	0.897061	0.94926
ENSMUSG00000032501.10	MGI:2443397	Trib1	tribbles pseudokinase 1	2.56583	2.58021e-10	7.99427e-09	0.639007	0.116941	0.266489
ENSMUSG00000032503.19	MGI:107562	Arpp21	cyclic AMP-regulated phosphoprotein, 21	0.658404	0.000105111	0.000555753	0.26331	0.120848	0.272824
ENSMUSG00000032511.18	MGI:98251	Scn5a	sodium channel, voltage-gated, type V, alpha	2.94016	3.97803e-05	0.000238943	0.752942	0.26507	0.464031
ENSMUSG00000032515.9	MGI:2387989	Csrnp1	cysteine-serine-rich nuclear protein 1	1.87218	1.19796e-08	2.18987e-07	0.0592235	0.857977	0.926872
ENSMUSG00000032518.7	MGI:105381	Rpsa	ribosomal protein SA	0.607757	2.56153e-08	4.23371e-07	0.218033	0.0459938	0.13789
ENSMUSG00000032530.15	MGI:1916282	Lyzl4	lysozyme-like 4	2.27759	9.57163e-06	6.94691e-05	0.985633	0.0344139	0.112182
ENSMUSG00000032531.16	MGI:1929286	Amotl2	angiomotin-like 2	0.748266	1.20303e-05	8.40646e-05	0.1928	0.265262	0.464301
ENSMUSG00000032555.11	MGI:1920018	Topbp1	topoisomerase (DNA) II binding protein 1	0.692182	1.46208e-09	3.55411e-08	0.209395	0.0703878	0.187397
ENSMUSG00000032575.17	MGI:1922090	Manf	mesencephalic astrocyte-derived neurotrophic factor	0.78159	4.5482e-05	0.000268428	0.259732	0.176826	0.354984
ENSMUSG00000032590.15	MGI:88041	Apeh	acylpeptide hydrolase	0.620638	2.03033e-05	0.000133249	0.435875	0.00303268	0.0181275
ENSMUSG00000032593.6	MGI:2444854	Amigo3	adhesion molecule with Ig like domain 3	0.737444	0.000346124	0.00157942	0.32018	0.143486	0.307974
ENSMUSG00000032640.11	MGI:2681120	Chsy1	chondroitin sulfate synthase 1	1.01131	7.35817e-10	1.97418e-08	0.067862	0.682836	0.821501
ENSMUSG00000032643.13	MGI:1341092	Fhl3	four and a half LIM domains 3	1.51686	0.000365663	0.00165727	0.877273	0.0496798	0.145759
ENSMUSG00000032656.15	MGI:2443667	Marchf3	membrane associated ring-CH-type finger 3	1.81302	2.05228e-07	2.52707e-06	0.540674	0.12635	0.281205
ENSMUSG00000032661.10	MGI:2180850	Oas3	2'-5' oligoadenylate synthetase 3	5.37387	2.90895e-06	2.47635e-05	4.11144	0.00205678	0.0133785
ENSMUSG00000032673.6	MGI:1915189	Prorsd1	prolyl-tRNA synthetase domain containing 1	0.931181	0.000497862	0.00217413	0.322383	0.232903	0.426509
ENSMUSG00000032691.15	MGI:2653833	Nlrp3	NLR family, pyrin domain containing 3	1.90469	3.13725e-06	2.64281e-05	1.28768	0.0020745	0.0134756
ENSMUSG00000032702.17	MGI:2147707	Kank1	KN motif and ankyrin repeat domains 1	0.845651	5.92205e-05	0.000338367	0.475167	0.0247893	0.0885264
ENSMUSG00000032714.7	MGI:1918959	Syde1	synapse defective 1, Rho GTPase, homolog 1 (C. elegans)	0.813662	9.85362e-08	1.34488e-06	0.2177	0.15791	0.329198
ENSMUSG00000032715.10	MGI:1345675	Trib3	tribbles pseudokinase 3	1.53651	0.000749223	0.00308186	0.386551	0.470038	0.662767
ENSMUSG00000032717.15	MGI:107687	Mdfi	MyoD family inhibitor	2.72237	9.85136e-06	7.10361e-05	1.65617	0.0178012	0.069666
ENSMUSG00000032733.7	MGI:2443239	Snx33	sorting nexin 33	0.863245	0.00014585	0.00074073	0.529801	0.0212782	0.0794329
ENSMUSG00000032739.17	MGI:3576625	Pram1	PML-RAR alpha-regulated adaptor molecule 1	1.57082	0.000117216	0.000611039	1.21516	0.0056066	0.0290868
ENSMUSG00000032766.10	MGI:1913316	Gng11	guanine nucleotide binding protein (G protein), gamma 11	1.24429	5.2601e-10	1.48082e-08	0.524165	0.0101268	0.0454384
ENSMUSG00000032806.14	MGI:95048	Slc10a3	solute carrier family 10 (sodium/bile acid cotransporter family), member 3	0.903973	0.0010448	0.00411143	0.187886	0.507254	0.693657
ENSMUSG00000032841.16	MGI:1919696	Prr5l	proline rich 5 like	0.906447	0.0012225	0.00471766	0.420958	0.13574	0.296074
ENSMUSG00000032860.6	MGI:105107	P2ry2	purinergic receptor P2Y, G-protein coupled 2	2.65883	1.86807e-10	5.98392e-09	1.37114	0.00153909	0.0107
ENSMUSG00000032911.7	MGI:2153093	Cspg4	chondroitin sulfate proteoglycan 4	1.40859	2.51032e-10	7.81304e-09	0.00352639	0.987435	0.994634
ENSMUSG00000032939.15	MGI:1919055	Nup93	nucleoporin 93	0.710164	7.4557e-09	1.44682e-07	0.320948	0.00974562	0.04409
ENSMUSG00000033006.11	MGI:98358	Sox10	SRY (sex determining region Y)-box 10	1.0065	0.000123302	0.000638272	0.636699	0.0154267	0.0625069
ENSMUSG00000033032.16	MGI:2147199	Afap1l1	actin filament associated protein 1-like 1	0.708566	0.000123483	0.000638608	0.0807005	0.665354	0.808751
ENSMUSG00000033053.5	MGI:1914733	1700028P14Rik	RIKEN cDNA 1700028P14 gene	2.72521	1.05519e-12	7.63412e-11	1.04192	0.00692284	0.0341189
ENSMUSG00000033107.7	MGI:1914914	Rnf125	ring finger protein 125	1.31795	0.000197361	0.000966883	-0.0921357	0.803954	0.896385
ENSMUSG00000033191.15	MGI:99906	Tie1	tyrosine kinase with immunoglobulin-like and EGF-like domains 1	1.00131	4.51787e-07	4.93152e-06	0.337226	0.0918483	0.225664
ENSMUSG00000033209.18	MGI:2140873	Ttc28	tetratricopeptide repeat domain 28	0.639362	0.000128413	0.000661363	0.452517	0.00711259	0.0347443
ENSMUSG00000033276.19	MGI:1920831	Stk36	serine/threonine kinase 36	0.644398	0.00259495	0.00906532	0.588564	0.00600848	0.0306687
ENSMUSG00000033295.15	MGI:102695	Ptprf	protein tyrosine phosphatase, receptor type, F	1.15097	2.18982e-06	1.9432e-05	0.537269	0.0271578	0.0944728
ENSMUSG00000033306.16	MGI:2441849	Lpp	LIM domain containing preferred translocation partner in lipoma	0.670894	0.000126073	0.000650288	-0.0144831	0.934612	0.968904
ENSMUSG00000033313.12	MGI:1354697	Fbxl8	F-box and leucine-rich repeat protein 8	1.65961	2.69946e-06	2.32327e-05	0.822034	0.0243383	0.0873439
ENSMUSG00000033335.18	MGI:109547	Dnm2	dynamin 2	0.626151	0.000281073	0.00131452	0.44795	0.00955399	0.0434685
ENSMUSG00000033446.8	MGI:1914418	Lpar6	lysophosphatidic acid receptor 6	0.800057	0.000951507	0.00379055	0.692286	0.00512512	0.0271753
ENSMUSG00000033502.16	MGI:2442676	Cdc14a	CDC14 cell division cycle 14A	0.896035	3.92947e-06	3.20482e-05	0.552272	0.00587	0.0301604
ENSMUSG00000033542.14	MGI:1858952	Arhgef5	Rho guanine nucleotide exchange factor (GEF) 5	1.08376	1.7786e-06	1.61863e-05	0.544614	0.0197611	0.0752179
ENSMUSG00000033730.5	MGI:1306780	Egr3	early growth response 3	0.80505	0.000851564	0.00344292	0.0415911	0.863347	0.929916
ENSMUSG00000033763.15	MGI:3039591	Mtss2	MTSS I-BAR domain containing 2	0.715265	7.57899e-08	1.07956e-06	0.16238	0.222499	0.412982
ENSMUSG00000033792.13	MGI:99400	Atp7a	ATPase, Cu++ transporting, alpha polypeptide	0.950092	2.37741e-05	0.000153375	0.409884	0.0717334	0.18993
ENSMUSG00000033885.16	MGI:1289230	Pxk	PX domain containing serine/threonine kinase	0.694985	3.49862e-06	2.89475e-05	0.286655	0.0572138	0.161593
ENSMUSG00000033898.18	MGI:3611575	Cfhr2	complement factor H-related 2	1.31527	0.00185229	0.00676567	1.11678	0.00925147	0.0424455
ENSMUSG00000034023.17	MGI:2448480	Fancd2	Fanconi anemia, complementation group D2	0.98465	4.64929e-05	0.000273516	0.189531	0.439601	0.63746
ENSMUSG00000034121.13	MGI:3584243	Mks1	MKS transition zone complex subunit 1	0.76528	9.20839e-05	0.000496742	0.551579	0.00554573	0.0288582
ENSMUSG00000034161.9	MGI:102934	Scx	scleraxis	2.81987	7.7113e-06	5.75671e-05	0.878414	0.176742	0.354887
ENSMUSG00000034164.18	MGI:2155091	Emid1	EMI domain containing 1	1.53617	0.000247668	0.00117696	1.30731	0.00201412	0.0131831
ENSMUSG00000034168.8	MGI:2442463	Irf2bpl	interferon regulatory factor 2 binding protein-like	0.958487	1.39649e-15	2.71572e-13	0.359839	0.00295033	0.0177544
ENSMUSG00000034177.16	MGI:2442609	Rnf43	ring finger protein 43	0.862856	0.000189659	0.000934158	0.47136	0.0443792	0.134559
ENSMUSG00000034205.17	MGI:2137913	Loxl2	lysyl oxidase-like 2	3.39012	1.44299e-06	1.3541e-05	0.883911	0.219985	0.409784
ENSMUSG00000034206.16	MGI:2155399	Polq	polymerase (DNA directed), theta	1.06185	1.54345e-07	1.97579e-06	0.550465	0.009443	0.0431349
ENSMUSG00000034266.7	MGI:1859147	Batf	basic leucine zipper transcription factor, ATF-like	2.31373	0.00219145	0.00783547	1.94078	0.0198161	0.0753794
ENSMUSG00000034275.19	MGI:2685354	Igsf9b	immunoglobulin superfamily, member 9B	2.01893	4.31662e-12	2.50766e-10	0.769941	0.0083234	0.0391325
ENSMUSG00000034349.15	MGI:1917349	Smc4	structural maintenance of chromosomes 4	1.35009	1.9727e-12	1.28483e-10	0.611702	0.00169323	0.0115317
ENSMUSG00000034387.14	MGI:2443733	Ssu2	ssu-2 homolog (C. elegans)	2.14927	0.000606066	0.00257409	0.487564	0.390087	0.592499
ENSMUSG00000034485.11	MGI:1919815	Uaca	uveal autoantigen with coiled-coil domains and ankyrin repeats	1.21774	3.64628e-07	4.10937e-06	0.312386	0.196682	0.380253
ENSMUSG00000034487.5	MGI:1923765	Poglut3	protein O-glucosyltransferase 3	0.87826	6.55939e-06	4.99329e-05	0.54168	0.00631745	0.0319138
ENSMUSG00000034591.6	MGI:2442940	Slc41a2	solute carrier family 41, member 2	0.625736	0.000161631	0.000810819	0.360473	0.0293309	0.0999922
ENSMUSG00000034640.10	MGI:2159210	Tiparp	TCDD-inducible poly(ADP-ribose) polymerase	0.96205	3.22603e-09	7.02991e-08	0.230553	0.159554	0.331418
ENSMUSG00000034641.3	MGI:2442358	Cd300ld	CD300 molecule like family member d	4.41302	2.14366e-08	3.62611e-07	0.85782	0.327746	0.531527
ENSMUSG00000034652.13	MGI:2443411	Cd300a	CD300A molecule	1.47172	0.000912858	0.00365303	1.14325	0.0123564	0.052971
ENSMUSG00000034684.13	MGI:1096347	Sema3f	sema domain, immunoglobulin domain (Ig), short basic domain, secreted, (semaphorin) 3F	1.43641	0.000230913	0.0011065	0.339577	0.396033	0.598574
ENSMUSG00000034707.8	MGI:1922862	Gns	glucosamine (N-acetyl)-6-sulfatase	0.944935	0.000116584	0.000607977	0.446284	0.0690018	0.184915
ENSMUSG00000034739.18	MGI:2385957	Mfrp	membrane frizzled-related protein	1.37912	2.6619e-06	2.29743e-05	0.836758	0.00507803	0.0269732
ENSMUSG00000034755.19	MGI:2442849	Pcdh11x	protocadherin 11 X-linked	2.79222	1.86447e-07	2.32805e-06	0.226009	0.673282	0.814324
ENSMUSG00000034795.15	MGI:1918358	Ccdc122	coiled-coil domain containing 122	0.817941	0.000102391	0.000543153	0.63817	0.00302107	0.0180761
ENSMUSG00000034880.8	MGI:2137227	Mrpl34	mitochondrial ribosomal protein L34	0.668403	5.20511e-06	4.10362e-05	0.462647	0.00195384	0.0128797
ENSMUSG00000034883.10	MGI:1916956	Lrr1	leucine rich repeat protein 1	3.12673	2.14957e-06	1.9112e-05	1.85079	0.0235326	0.08528
ENSMUSG00000034902.18	MGI:1298224	Pip5k1c	phosphatidylinositol-4-phosphate 5-kinase, type 1 gamma	0.622358	2.36115e-05	0.000152515	0.326612	0.0265719	0.0929727
ENSMUSG00000034911.9	MGI:1922920	Ushbp1	USH1 protein network component harmonin binding protein 1	0.614493	0.00202975	0.00732698	0.0196095	0.922618	0.962629
ENSMUSG00000034936.3	MGI:1933155	Arl4d	ADP-ribosylation factor-like 4D	1.44252	2.50792e-06	2.18447e-05	0.0814007	0.793656	0.890395
ENSMUSG00000034993.8	MGI:1349450	Vat1	vesicle amine transport 1	1.34396	1.66855e-07	2.11617e-06	0.632016	0.0142331	0.0587356
ENSMUSG00000035000.9	MGI:94919	Dpp4	dipeptidylpeptidase 4	1.04886	0.00163744	0.00607725	0.2056	0.573148	0.744854
ENSMUSG00000035021.14	MGI:1309478	Baz1a	bromodomain adjacent to zinc finger domain 1A	2.05735	5.79407e-09	1.15881e-07	1.07475	0.00322865	0.0189873
ENSMUSG00000035042.3	MGI:98262	Ccl5	chemokine (C-C motif) ligand 5	3.68787	7.47857e-06	5.60433e-05	1.88618	0.0397358	0.124532
ENSMUSG00000035069.4	MGI:1914263	Oma1	OMA1 zinc metallopeptidase	0.602018	0.00118867	0.00460747	0.484166	0.0108242	0.0478444
ENSMUSG00000035109.15	MGI:2655364	Shc4	SHC (Src homology 2 domain containing) family, member 4	1.77997	6.21371e-11	2.39972e-09	0.533797	0.052316	0.151333
ENSMUSG00000035164.9	MGI:3026959	Zc3h12c	zinc finger CCCH type containing 12C	0.689346	1.01669e-05	7.28445e-05	0.219096	0.163342	0.336316
ENSMUSG00000035212.15	MGI:2687005	Leprot	leptin receptor overlapping transcript	0.774077	4.78908e-07	5.19038e-06	0.459124	0.00301172	0.0180291
ENSMUSG00000035268.15	MGI:1343086	Pkig	protein kinase inhibitor, gamma	0.727882	0.000391035	0.00175825	0.489723	0.0173235	0.0682634
ENSMUSG00000035273.15	MGI:1343124	Hpse	heparanase	2.07877	0.000763654	0.00313323	0.449359	0.480504	0.672124
ENSMUSG00000035274.14	MGI:1341264	Tpbg	trophoblast glycoprotein	2.07162	2.23294e-09	5.15815e-08	0.886387	0.0115475	0.0502286
ENSMUSG00000035299.17	MGI:1100537	Mid1	midline 1	0.958911	0.00161574	0.006004	0.623972	0.0405634	0.126434
ENSMUSG00000035356.18	MGI:1931595	Nfkbiz	nuclear factor of kappa light polypeptide gene enhancer in B cells inhibitor, zeta	1.15776	1.72947e-07	2.17832e-06	0.191189	0.397392	0.599956
ENSMUSG00000035373.3	MGI:99512	Ccl7	chemokine (C-C motif) ligand 7	4.1461	8.19307e-05	0.000449039	1.01532	0.402413	0.604613
ENSMUSG00000035385.6	MGI:98259	Ccl2	chemokine (C-C motif) ligand 2	4.34045	2.28428e-05	0.000148143	3.83288	0.00200267	0.0131404
ENSMUSG00000035413.9	MGI:1923457	Tmem98	transmembrane protein 98	0.669918	0.00159657	0.00594082	0.530889	0.0136143	0.0569517
ENSMUSG00000035439.14	MGI:1923728	Haus8	4HAUS augmin-like complex, subunit 8	1.35085	1.51493e-09	3.66308e-08	0.553381	0.0143552	0.0591099
ENSMUSG00000035506.17	MGI:2443672	Slc12a8	solute carrier family 12 (potassium/chloride transporters), member 8	2.03187	1.81184e-08	3.14434e-07	0.540387	0.16509	0.33882
ENSMUSG00000035621.14	MGI:1890222	Midn	midnolin	1.59499	1.22586e-13	1.2091e-11	0.673168	0.00183734	0.0122972
ENSMUSG00000035678.9	MGI:1101058	Tnfsf9	tumor necrosis factor (ligand) superfamily, member 9	1.65153	0.00108421	0.0042458	0.787385	0.152864	0.321923
ENSMUSG00000035704.18	MGI:2141959	Alg8	asparagine-linked glycosylation 8 (alpha-1,3-glucosyltransferase)	0.974953	2.57322e-08	4.24791e-07	0.242427	0.173115	0.350265
ENSMUSG00000035842.11	MGI:2443590	Ddx11	DEAD/H box helicase 11	1.50387	1.93008e-06	1.73974e-05	0.921194	0.00489507	0.0261749
ENSMUSG00000035914.12	MGI:2183926	Cd276	CD276 antigen	0.852049	6.45193e-11	2.47429e-09	0.206636	0.121305	0.273496
ENSMUSG00000036040.15	MGI:1925044	Adamtsl2	ADAMTS-like 2	1.08187	0.00025152	0.00119217	0.491885	0.098474	0.236812
ENSMUSG00000036053.18	MGI:1918659	Fmnl2	formin-like 2	0.753192	1.80067e-10	5.78832e-09	0.263322	0.0263492	0.092449
ENSMUSG00000036109.18	MGI:2444912	Mbnl3	muscleblind like splicing factor 3	3.12427	0.00260278	0.00908455	2.06642	0.0555578
ENSMUSG00000036273.16	MGI:1913975	Lrrk2	leucine-rich repeat kinase 2	1.16004	9.72207e-06	7.02819e-05	0.55759	0.0335851	0.110107
ENSMUSG00000036395.16	MGI:2388283	Glb1l2	galactosidase, beta 1-like 2	2.19753	1.82032e-06	1.6522e-05	1.47346	0.00227457	0.0145009
ENSMUSG00000036446.6	MGI:109347	Lum	lumican	2.33761	2.39652e-07	2.88593e-06	0.108479	0.812037	0.901188
ENSMUSG00000036466.18	MGI:1920951	Megf11	multiple EGF-like-domains 11	3.13569	4.77678e-08	7.24443e-07	1.32052	0.0213168	0.0795403
ENSMUSG00000036526.9	MGI:1916978	Card11	caspase recruitment domain family, member 11	2.90328	3.31581e-06	2.77135e-05	0.81575	0.214958	0.403511
ENSMUSG00000036528.17	MGI:894649	Ppfibp2	PTPRF interacting protein, binding protein 2 (liprin beta 2)	0.720993	0.00243225	0.00857778	0.224956	0.350591	0.554598
ENSMUSG00000036533.10	MGI:2384718	Cdc42ep3	CDC42 effector protein (Rho GTPase binding) 3	1.15329	0.000357346	0.00162387	0.333479	0.305524	0.508805
ENSMUSG00000036586.7	MGI:1925248	Grifin	galectin-related inter-fiber protein	2.07306	0.000684527	0.00285341	1.78165	0.0113129	0.0495037
ENSMUSG00000036661.15	MGI:2146009	Dennd3	DENN/MADD domain containing 3	0.817431	4.5216e-05	0.000267088	0.47473	0.0174912	0.0687325
ENSMUSG00000036672.6	MGI:2443939	Cenpt	centromere protein T	0.619007	1.22333e-11	6.0114e-10	0.282181	0.00263296	0.0162855
ENSMUSG00000036781.14	MGI:1915191	Rps27l	ribosomal protein S27-like	1.25157	1.41057e-09	3.45219e-08	0.515462	0.014014	0.058118
ENSMUSG00000036864.17	MGI:2681861	Proser3	proline and serine rich 3	0.778601	0.000115491	0.000603078	0.491713	0.0165075	0.0657702
ENSMUSG00000036867.8	MGI:1336883	Smad6	SMAD family member 6	1.21322	0.00239837	0.00847138	0.529991	0.192654	0.374937
ENSMUSG00000036904.7	MGI:108460	Fzd8	frizzled class receptor 8	0.617289	0.00268451	0.00932707	0.300535	0.152437	0.321423
ENSMUSG00000036912.19	MGI:3041167	Piwil4	piwi-like RNA-mediated gene silencing 4	4.6944	0.000167131	0.000835655	3.1579	0.0146849	0.0601226
ENSMUSG00000036918.17	MGI:1920999	Ttc7	tetratricopeptide repeat domain 7	1.60938	2.33804e-08	3.89525e-07	0.841683	0.00387962	0.0218289
ENSMUSG00000036968.16	MGI:1913705	Cnpy4	canopy FGF signaling regulator 4	0.619118	2.87978e-05	0.000180653	0.443151	0.00329423	0.0192318
ENSMUSG00000037062.14	MGI:1859730	Sh3glb1	SH3-domain GRB2-like B1 (endophilin)	0.710498	1.83557e-05	0.000121956	0.323336	0.0516731	0.150051
ENSMUSG00000037089.12	MGI:1921086	Slc35b2	solute carrier family 35, member B2	0.638163	2.45005e-05	0.000157147	0.410352	0.00705157	0.0345409
ENSMUSG00000037095.9	MGI:1924155	Lrg1	leucine-rich alpha-2-glycoprotein 1	3.04798	0.000153854	0.00077606	1.27178	0.11856	0.268948
ENSMUSG00000037185.10	MGI:1921377	Krt80	keratin 80	2.77838	0.00018561	0.000916023	-0.304283	0.703328	0.833475
ENSMUSG00000037211.13	MGI:1345139	Spry1	sprouty RTK signaling antagonist 1	1.16035	2.04955e-07	2.52578e-06	-0.25407	0.262867	0.461722
ENSMUSG00000037225.14	MGI:95516	Fgf2	fibroblast growth factor 2	1.89859	1.19126e-10	4.15398e-09	0.560618	0.059582	0.16626
ENSMUSG00000037242.9	MGI:1352754	Clic4	chloride intracellular channel 4 (mitochondrial)	0.868734	1.19371e-06	1.1509e-05	0.35619	0.0469363	0.139809
ENSMUSG00000037263.14	MGI:1920708	Aldh3b3	aldehyde dehydrogenase 3 family, member B3	1.71665	0.000986682	0.00391192	1.59144	0.0113175	0.0495058
ENSMUSG00000037278.10	MGI:1916321	Tmem97	transmembrane protein 97	0.736831	6.00023e-06	4.62933e-05	0.0812458	0.62719	0.782677
ENSMUSG00000037280.13	MGI:1891640	Galnt6	polypeptide N-acetylgalactosaminyltransferase 6	1.55531	1.13453e-05	7.98935e-05	0.893709	0.0121118	0.0520989
ENSMUSG00000037295.8	MGI:2140175	Ldlrap1	low density lipoprotein receptor adaptor protein 1	1.85143	3.39759e-06	2.82737e-05	1.09683	0.00659411	0.0329103
ENSMUSG00000037306.14	MGI:2446214	Man1c1	mannosidase, alpha, class 1C, member 1	0.908045	0.000433008	0.00192495	0.46601	0.0717164	0.18993
ENSMUSG00000037337.12	MGI:1346882	Map4k1	mitogen-activated protein kinase kinase kinase kinase 1	1.20395	4.74329e-06	3.78085e-05	0.795868	0.00384202	0.0216821
ENSMUSG00000037370.14	MGI:97370	Enpp1	ectonucleotide pyrophosphatase/phosphodiesterase 1	2.47667	2.24433e-09	5.18008e-08	0.440384	0.291081	0.494061
ENSMUSG00000037410.14	MGI:1914266	Tbc1d2b	TBC1 domain family, member 2B	0.705006	0.0023796	0.00841701	0.16232	0.485943	0.676662
ENSMUSG00000037428.15	MGI:1343180	Vgf	VGF nerve growth factor inducible	2.0865	6.79495e-08	9.80618e-07	0.363569	0.347207	0.551044
ENSMUSG00000037447.17	MGI:2443039	Arid5a	AT rich interactive domain 5A (MRF1-like)	0.962446	0.000749387	0.00308207	0.342982	0.232532	0.426207
ENSMUSG00000037470.15	MGI:2443162	Uggt1	UDP-glucose glycoprotein glucosyltransferase 1	0.598337	8.61392e-08	1.20384e-06	0.188533	0.0926904	0.227014
ENSMUSG00000037523.14	MGI:2444773	Mavs	mitochondrial antiviral signaling protein	0.993541	1.38492e-05	9.51983e-05	0.676761	0.00346394	0.0199452
ENSMUSG00000037563.16	MGI:98118	Rps16	ribosomal protein S16	0.596096	1.05869e-05	7.53619e-05	0.288736	0.0334073	0.109704
ENSMUSG00000037578.5	MGI:1352448	Pkd2l1	polycystic kidney disease 2-like 1	1.55522	0.000685664	0.00285772	-0.635289	0.160102	0.332132
ENSMUSG00000037580.11	MGI:95675	Gch1	GTP cyclohydrolase 1	1.17568	0.000274753	0.00128804	-0.739112	0.0283963	0.0977904
ENSMUSG00000037594.12	MGI:2443738	Clba1	clathrin binding box of aftiphilin containing 1	0.873692	2.77293e-08	4.52583e-07	0.243306	0.125688	0.280172
ENSMUSG00000037613.17	MGI:1930269	Tnfrsf23	tumor necrosis factor receptor superfamily, member 23	2.12526	7.88312e-09	1.52008e-07	0.623738	0.100818	0.240406
ENSMUSG00000037636.7	MGI:2684854	Slc25a43	solute carrier family 25, member 43	2.05457	0.00207909	0.00748243	2.1328	0.0128472	0.0544382
ENSMUSG00000037638.6	MGI:3644133	Zbtb42	zinc finger and BTB domain containing 42	2.37736	2.00103e-10	6.36523e-09	0.923225	0.00968143	0.0439071
ENSMUSG00000037679.10	MGI:1917685	Inf2	inverted formin, FH2 and WH2 domain containing	0.801003	0.00194178	0.00704748	0.563731	0.0292736	0.0998463
ENSMUSG00000037681.14	MGI:1098699	Esyt3	extended synaptotagmin-like protein 3	2.47405	0.000776939	0.0031787	-0.254806	0.716117	0.841743
ENSMUSG00000037759.7	MGI:97794	Ptger2	prostaglandin E receptor 2 (subtype EP2)	2.0099	3.52924e-06	2.91657e-05	0.965593	0.0307853	0.103671
ENSMUSG00000037762.7	MGI:1914109	Slc16a9	solute carrier family 16 (monocarboxylic acid transporters), member 9	1.23947	6.96518e-07	7.21243e-06	0.568612	0.0267059	0.0933599
ENSMUSG00000037813.14	MGI:3606579	D630003M21Rik	RIKEN cDNA D630003M21 gene	0.588814	0.000973421	0.00386605	-0.0105656	0.953655	0.978476
ENSMUSG00000037820.16	MGI:98731	Tgm2	transglutaminase 2, C polypeptide	2.01579	2.40731e-08	3.99566e-07	0.746168	0.039601	0.124219
ENSMUSG00000037824.7	MGI:1196325	Tspan14	tetraspanin 14	0.723091	6.67549e-06	5.0662e-05	0.461502	0.00420275	0.0233587
ENSMUSG00000037868.16	MGI:95296	Egr2	early growth response 2	3.32051	3.70704e-07	4.16928e-06	-0.497471	0.459027	0.654457
ENSMUSG00000037913.13	MGI:2685292	Tmem156	transmembrane protein 156	1.97576	0.000206764	0.00100648	1.45601	0.021204	0.0792052
ENSMUSG00000037946.12	MGI:1353657	Fgd3	FYVE, RhoGEF and PH domain containing 3	1.27007	2.53851e-06	2.20551e-05	0.490329	0.0712648	0.188957
ENSMUSG00000037960.12	MGI:1915730	Card19	caspase recruitment domain family, member 19	1.82695	3.8347e-09	8.13836e-08	0.78131	0.013058	0.0550923
ENSMUSG00000037966.16	MGI:1196617	Ninj1	ninjurin 1	1.27682	8.2408e-05	0.000451474	0.230417	0.479704	0.671435
ENSMUSG00000037991.10	MGI:2685383	Rmi2	RecQ mediated genome instability 2	2.15119	6.98959e-06	5.28556e-05	1.58679	0.00251881	0.0157448
ENSMUSG00000038007.15	MGI:1920932	Acer2	alkaline ceramidase 2	1.34132	3.09351e-08	4.99846e-07	0.453506	0.0637491	0.174257
ENSMUSG00000038037.6	MGI:1354910	Socs1	suppressor of cytokine signaling 1	3.02282	9.05527e-07	9.02236e-06	1.70582	0.00593428	0.0303933
ENSMUSG00000038058.15	MGI:1341839	Nod1	nucleotide-binding oligomerization domain containing 1	1.14072	9.48404e-07	9.39156e-06	0.624013	0.00841789	0.0394877
ENSMUSG00000038059.8	MGI:1917088	Smim3	small integral membrane protein 3	1.16937	1.09859e-07	1.47591e-06	0.320992	0.148718	0.315508
ENSMUSG00000038168.6	MGI:2146663	P3h2	prolyl 3-hydroxylase 2	0.917176	0.00184711	0.00675124	0.775585	0.00873412	0.0406145
ENSMUSG00000038179.14	MGI:1922595	Slamf7	SLAM family member 7	5.41281	1.06172e-05	7.55184e-05	2.74236	0.0730467	0.192325
ENSMUSG00000038188.18	MGI:2449455	Scarf1	scavenger receptor class F, member 1	1.16105	4.94108e-06	3.91952e-05	0.81694	0.0016985	0.0115602
ENSMUSG00000038217.14	MGI:1917141	Tlcd2	TLC domain containing 2	1.22786	0.000337262	0.00154489	0.555295	0.125572	0.280034
ENSMUSG00000038225.16	MGI:3603756	Primpol	primase and polymerase (DNA-directed)	0.753157	3.44476e-05	0.000210885	0.432439	0.019511	0.0746086
ENSMUSG00000038292.15	MGI:2687329	Kash5	KASH domain containing 5	0.991726	1.1445e-06	1.10891e-05	0.582429	0.00438944	0.0241424
ENSMUSG00000038366.16	MGI:109656	Lasp1	LIM and SH3 protein 1	0.695889	2.73335e-07	3.22358e-06	0.200888	0.138663	0.300405
ENSMUSG00000038393.15	MGI:1889549	Txnip	thioredoxin interacting protein	1.04916	0.000124339	0.000642311	0.525188	0.0556856	0.158628
ENSMUSG00000038400.16	MGI:1929600	Pmepa1	prostate transmembrane protein, androgen induced 1	2.34796	7.44816e-10	1.99637e-08	0.601299	0.11533	0.264351
ENSMUSG00000038402.3	MGI:1347479	Foxf2	forkhead box F2	0.970769	1.61576e-06	1.49013e-05	0.364875	0.081454	0.207111
ENSMUSG00000038489.9	MGI:1913741	Polr2l	polymerase (RNA) II (DNA directed) polypeptide L	0.709596	3.88266e-08	6.04557e-07	0.301124	0.0217015	0.0805218
ENSMUSG00000038508.8	MGI:1346047	Gdf15	growth differentiation factor 15	5.2958	6.20276e-05	0.000353082	1.80798	0.200456	0.385349
ENSMUSG00000038518.16	MGI:104813	Jarid2	jumonji, AT rich interactive domain 2	0.610962	8.82772e-06	6.47728e-05	-0.0871871	0.529426	0.71078
ENSMUSG00000038543.14	MGI:2385885	BC028528	cDNA sequence BC028528	1.51895	8.7933e-07	8.80293e-06	0.731516	0.0201276	0.076215
ENSMUSG00000038576.16	MGI:2138351	Susd4	sushi domain containing 4	0.650539	0.00022726	0.00109171	0.288696	0.102049	0.24257
ENSMUSG00000038587.11	MGI:1932576	Akap12	A kinase (PRKA) anchor protein (gravin) 12	1.95643	1.24214e-09	3.10975e-08	0.293054	0.364692	0.567884
ENSMUSG00000038612.17	MGI:101769	Mcl1	myeloid cell leukemia sequence 1	1.02651	1.42201e-08	2.5468e-07	0.396486	0.0288601	0.0989341
ENSMUSG00000038618.13	MGI:1914235	Rassf7	Ras association (RalGDS/AF-6) domain family (N-terminal) member 7	1.60094	0.00030014	0.00139441	0.5989	0.182098	0.361894
ENSMUSG00000038623.10	MGI:1933209	Tm6sf1	transmembrane 6 superfamily member 1	0.814275	0.000653056	0.00274056	0.548131	0.0223495	0.0822281
ENSMUSG00000038648.6	MGI:2442695	Creb3l2	cAMP responsive element binding protein 3-like 2	0.990001	1.31402e-05	9.09401e-05	0.533076	0.0195603	0.0747258
ENSMUSG00000038732.16	MGI:2387184	Mboat1	membrane bound O-acyltransferase domain containing 1	1.66841	5.03912e-07	5.42919e-06	0.949439	0.00547916	0.0285861
ENSMUSG00000038763.13	MGI:2151224	Alpk3	alpha-kinase 3	2.19594	1.06315e-05	7.55809e-05	1.61077	0.00161043	0.0110871
ENSMUSG00000038803.8	MGI:1914945	Ost4	oligosaccharyltransferase complex subunit 4 (non-catalytic)	0.813584	8.3582e-08	1.17589e-06	0.339373	0.0265707	0.0929727
ENSMUSG00000038917.5	MGI:1921277	3930402G23Rik	RIKEN cDNA 3930402G23 gene	3.34555	8.69244e-08	1.21399e-06	1.51729	0.0220537	0.0813927
ENSMUSG00000038932.14	MGI:2672878	Tcfl5	transcription factor-like 5 (basic helix-loop-helix)	2.67123	0.00143835	0.00541751	-0.774254	0.346057	0.550001
ENSMUSG00000039062.16	MGI:5000466	Anpep	alanyl (membrane) aminopeptidase	1.5779	0.000548249	0.00236108	0.113416	0.806136	0.898061
ENSMUSG00000039079.2	MGI:2177284	Trhr2	thyrotropin releasing hormone receptor 2	3.29426	0.000267564	0.00125886	1.78775	0.0330059	0.108802
ENSMUSG00000039103.13	MGI:1916060	Nexn	nexilin	1.1187	0.000221931	0.00106929	0.70062	0.0260183	0.0915419
ENSMUSG00000039109.18	MGI:1921395	F13a1	coagulation factor XIII, A1 subunit	2.38524	1.0398e-05	7.41903e-05	1.06601	0.0523774	0.151456
ENSMUSG00000039115.14	MGI:104756	Itga9	integrin alpha 9	1.43559	1.06609e-05	7.57705e-05	0.619067	0.0601872	0.167374
ENSMUSG00000039167.13	MGI:2655562	Adgrl4	adhesion G protein-coupled receptor L4	1.03318	7.72375e-07	7.86721e-06	0.455933	0.0296439	0.100762
ENSMUSG00000039191.13	MGI:96522	Rbpj	recombination signal binding protein for immunoglobulin kappa J region	1.51357	5.71548e-18	2.08958e-15	0.387109	0.0284903	0.097988
ENSMUSG00000039232.13	MGI:1921982	Stx11	syntaxin 11	2.92892	2.80444e-06	2.40155e-05	2.08624	0.00241247	0.0151987
ENSMUSG00000039236.19	MGI:1928895	Isg20	interferon-stimulated protein	2.2378	1.44201e-05	9.85295e-05	1.29655	0.0139541	0.0579467
ENSMUSG00000039263.17	MGI:2448523	Npepl1	aminopeptidase-like 1	0.910681	1.7409e-05	0.000116656	0.650713	0.00245521	0.0154275
ENSMUSG00000039286.13	MGI:1919257	Fndc3b	fibronectin type III domain containing 3B	0.80665	7.22035e-08	1.03439e-06	0.392432	0.00940377	0.0429721
ENSMUSG00000039405.8	MGI:1923703	Prss23	protease, serine 23	1.84495	2.34649e-06	2.0589e-05	1.20637	0.00205216	0.0133593
ENSMUSG00000039450.12	MGI:1915130	Dcxr	dicarbonyl L-xylulose reductase	1.01191	3.45098e-06	2.86485e-05	0.607005	0.00625015	0.031627
ENSMUSG00000039452.7	MGI:2685966	Snx22	sorting nexin 22	0.855308	0.0013212	0.00503717	0.798471	0.00302417	0.0180887
ENSMUSG00000039480.15	MGI:2442446	Nt5dc1	5'-nucleotidase domain containing 1	0.808349	0.000554111	0.00238212	0.171518	0.473135	0.665807
ENSMUSG00000039481.6	MGI:108417	Nrtn	neurturin	3.20595	8.29868e-05	0.000454191	1.71853	0.0250593	0.0892122
ENSMUSG00000039497.9	MGI:2443455	Dse	dermatan sulfate epimerase	0.717354	0.00031875	0.00146918	0.159684	0.427499	0.627289
ENSMUSG00000039501.15	MGI:2138982	Znfx1	zinc finger, NFX1-type containing 1	0.640589	9.58457e-06	6.95262e-05	0.353148	0.0149773	0.0610805
ENSMUSG00000039529.10	MGI:1859665	Atp8b1	ATPase, class I, type 8B, member 1	2.20628	1.67116e-07	2.1185e-06	0.372477	0.380802	0.583063
ENSMUSG00000039616.11	MGI:1915841	Mocos	molybdenum cofactor sulfurase	1.2523	1.80078e-09	4.23851e-08	0.497017	0.0177533	0.0695012
ENSMUSG00000039646.6	MGI:2177651	Vasn	vasorin	0.962167	0.00127935	0.00490352	0.195794	0.515758	0.700244
ENSMUSG00000039661.15	MGI:1914209	Dusp26	dual specificity phosphatase 26 (putative)	0.744665	0.000135602	0.000694473	0.443544	0.0227007	0.0830666
ENSMUSG00000039748.12	MGI:1349427	Exo1	exonuclease 1	2.28206	7.81888e-08	1.10798e-06	1.15174	0.0112962	0.0494488
ENSMUSG00000039783.16	MGI:2138151	Kmo	kynurenine 3-monooxygenase (kynurenine 3-hydroxylase)	3.65628	0.000220045	0.00106245	-1.58094	0.324637	0.528587
ENSMUSG00000039830.10	MGI:1355331	Olig2	oligodendrocyte transcription factor 2	1.27207	1.93545e-08	3.32102e-07	0.495696	0.0292658	0.0998463
ENSMUSG00000039865.9	MGI:2384860	Slc44a3	solute carrier family 44, member 3	2.56487	0.000629795	0.0026584	1.19574	0.143502	0.307974
ENSMUSG00000039910.11	MGI:1306784	Cited2	Cbp/p300-interacting transactivator, with Glu/Asp-rich carboxy-terminal domain, 2	0.800859	0.000175474	0.00087228	0.388574	0.0687833	0.184535
ENSMUSG00000039911.14	MGI:1921896	Spsb1	splA/ryanodine receptor domain and SOCS box containing 1	0.872034	0.00176257	0.00648632	0.873278	0.00178901	0.012037
ENSMUSG00000039942.16	MGI:104311	Ptger4	prostaglandin E receptor 4 (subtype EP4)	2.57337	5.87423e-06	4.55261e-05	1.38069	0.0152383	0.061872
ENSMUSG00000039959.14	MGI:1099804	Hip1	huntingtin interacting protein 1	1.10614	2.81718e-09	6.27514e-08	0.290249	0.119904	0.271203
ENSMUSG00000039981.7	MGI:3045313	Zc3h12d	zinc finger CCCH type containing 12D	4.28817	3.95358e-06	3.22161e-05	2.63633	0.0139141	0.0578337
ENSMUSG00000039985.15	MGI:1929091	Sinhcaf	SIN3-HDAC complex associated factor	0.850319	0.00191075	0.00695234	0.259626	0.389147	0.591707
ENSMUSG00000040006.14	MGI:2384905	Ginm1	glycoprotein integral membrane 1	0.696221	1.53254e-07	1.96465e-06	0.390985	0.00362825	0.0207091
ENSMUSG00000040033.17	MGI:103039	Stat2	signal transducer and activator of transcription 2	0.789181	2.58983e-05	0.000164687	0.535158	0.00445425	0.0243817
ENSMUSG00000040043.18	MGI:1861776	Rbms2	RNA binding motif, single stranded interacting protein 2	0.806816	1.59441e-05	0.000107948	0.457865	0.0159217	0.0640857
ENSMUSG00000040138.8	MGI:102570	Ndp	Norrie disease (pseudoglioma) (human)	0.758914	2.34628e-06	2.0589e-05	0.4549	0.00517518	0.0273804
ENSMUSG00000040152.9	MGI:98737	Thbs1	thrombospondin 1	5.10367	1.13229e-11	5.68634e-10	1.15885	0.127851	0.28352
ENSMUSG00000040231.17	MGI:1928903	Syngr4	synaptogyrin 4	4.30781	0.000434887	0.00193173	1.07231	0.276098
ENSMUSG00000040247.7	MGI:1922072	Tbc1d10c	TBC1 domain family, member 10c	1.12069	0.00184881	0.00675655	0.257422	0.459997	0.655219
ENSMUSG00000040254.12	MGI:1860118	Sema3d	sema domain, immunoglobulin domain (Ig), short basic domain, secreted, (semaphorin) 3D	1.58395	0.000380464	0.00171612	0.913889	0.0409536	0.127121
ENSMUSG00000040258.7	MGI:1336197	Nxph4	neurexophilin 4	1.45039	0.000964569	0.00383478	0.703184	0.0971082	0.234678
ENSMUSG00000040264.11	MGI:95666	Gbp2b	guanylate binding protein 2b	2.25865	0.000548847	0.00236328	1.72481	0.0257383	0.0908494
ENSMUSG00000040269.6	MGI:1913480	Mrps28	mitochondrial ribosomal protein S28	0.633339	1.34623e-05	9.28409e-05	-0.0948633	0.524488	0.706676
ENSMUSG00000040274.12	MGI:1277162	Cdk6	cyclin-dependent kinase 6	1.16919	1.11035e-06	1.08156e-05	0.39717	0.105438	0.24844
ENSMUSG00000040280.11	MGI:3039567	Ndufa4l2	Ndufa4, mitochondrial complex associated like 2	1.08161	3.68706e-06	3.02965e-05	0.461618	0.0564838	0.160209
ENSMUSG00000040322.11	MGI:1917160	Slc25a24	solute carrier family 25 (mitochondrial carrier, phosphate carrier), member 24	1.19529	1.14616e-05	8.0625e-05	0.209497	0.446186	0.64367
ENSMUSG00000040466.17	MGI:2385271	Blvrb	biliverdin reductase B (flavin reductase (NADPH))	0.977231	1.1898e-05	8.33315e-05	0.690319	0.00244321	0.0153682
ENSMUSG00000040511.15	MGI:107741	Pvr	poliovirus receptor	1.26491	3.02604e-12	1.84798e-10	0.510071	0.00546488	0.0285549
ENSMUSG00000040522.6	MGI:2176887	Tlr8	toll-like receptor 8	4.88724	1.76687e-06	1.60956e-05	0.22378	0.828884	0.91025
ENSMUSG00000040592.12	MGI:96431	Cd79b	CD79B antigen	1.81356	0.00112026	0.00437508	1.81513	0.00254516	0.0158724
ENSMUSG00000040616.4	MGI:2384874	Tmem51	transmembrane protein 51	0.829355	3.17553e-05	0.000196376	0.205937	0.319275	0.522832
ENSMUSG00000040666.20	MGI:1354740	Sh3bgr	SH3-binding domain glutamic acid-rich protein	1.20746	0.00196007	0.00710023	0.603182	0.135978	0.296377
ENSMUSG00000040681.17	MGI:96120	Hmgn1	high mobility group nucleosomal binding domain 1	0.629946	1.79256e-07	2.2454e-06	0.122936	0.312162	0.515892
ENSMUSG00000040713.13	MGI:1344382	Creg1	cellular repressor of E1A-stimulated genes 1	0.872216	0.0023689	0.00838891	0.240357	0.403836	0.605955
ENSMUSG00000040723.15	MGI:2676394	Rcsd1	RCSD domain containing 1	1.06717	0.000210734	0.00102289	0.857681	0.00338778	0.0196223
ENSMUSG00000040809.11	MGI:1330860	Chil3	chitinase-like 3	8.34485	2.39756e-08	3.98189e-07	1.11457	0.467068	0.660303
ENSMUSG00000040829.15	MGI:3603821	Zmynd15	zinc finger, MYND-type containing 15	2.57073	1.00989e-07	1.37153e-06	1.40935	0.0078778	0.037503
ENSMUSG00000040856.18	MGI:94900	Dlk1	delta like non-canonical Notch ligand 1	3.96814	0.00260227	0.00908455	-2.55909	0.0488349	0.14386
ENSMUSG00000040972.9	MGI:2681842	Igsf21	immunoglobulin superfamily, member 21	1.53952	0.000684382	0.00285324	-0.229036	0.61331	0.772184
ENSMUSG00000041075.9	MGI:108570	Fzd7	frizzled class receptor 7	1.16906	8.69367e-07	8.71274e-06	0.663032	0.00558413	0.0290015
ENSMUSG00000041117.9	MGI:3612184	Ccdc8	coiled-coil domain containing 8	0.59918	0.0015246	0.00569777	0.364047	0.0578229	0.162835
ENSMUSG00000041134.16	MGI:2152187	Cyyr1	cysteine and tyrosine-rich protein 1	0.703559	0.000771967	0.00316356	-0.0263377	0.900522	0.950872
ENSMUSG00000041147.11	MGI:109337	Brca2	breast cancer 2, early onset	0.931655	1.3338e-07	1.74738e-06	0.33138	0.0650764	0.17704
ENSMUSG00000041189.10	MGI:87890	Chrnb1	cholinergic receptor, nicotinic, beta polypeptide 1 (muscle)	2.01089	4.28613e-07	4.7275e-06	1.12531	0.00635658	0.0320576
ENSMUSG00000041238.17	MGI:2442995	Rbbp8	retinoblastoma binding protein 8, endonuclease	1.35852	1.60904e-05	0.000108723	0.573579	0.0738354	0.193786
ENSMUSG00000041272.12	MGI:2181659	Tox	thymocyte selection-associated high mobility group box	2.01983	1.07296e-05	7.61403e-05	0.0988697	0.82948	0.910513
ENSMUSG00000041319.15	MGI:2677480	Thoc6	THO complex 6	0.826779	2.3837e-06	2.08771e-05	0.267775	0.139274	0.301295
ENSMUSG00000041324.15	MGI:96570	Inhba	inhibin beta-A	2.75807	3.69309e-08	5.78324e-07	0.6339	0.206605	0.3933
ENSMUSG00000041378.3	MGI:1276112	Cldn5	claudin 5	1.32416	2.78078e-06	2.38427e-05	0.600299	0.0339708	0.111099
ENSMUSG00000041390.19	MGI:104611	Mdfic	MyoD family inhibitor domain containing	2.47067	1.76242e-10	5.68536e-09	1.2317	0.00189249	0.0125693
ENSMUSG00000041406.15	MGI:3590554	BC055324	cDNA sequence BC055324	1.54663	1.26587e-08	2.29716e-07	0.626011	0.0348968	0.113403
ENSMUSG00000041429.4	MGI:1313275	Nthl1	nth (endonuclease III)-like 1 (E.coli)	1.20863	1.25782e-06	1.20508e-05	0.432852	0.0905405	0.223525
ENSMUSG00000041445.10	MGI:2385618	Mmrn2	multimerin 2	1.03065	2.51559e-06	2.18886e-05	0.00566815	0.979588	0.991061
ENSMUSG00000041479.15	MGI:2442166	Syt15	synaptotagmin XV	1.34969	0.00190137	0.00692465	1.30281	0.00350977	0.0201573
ENSMUSG00000041538.17	MGI:95925	H2-Ob	histocompatibility 2, O region beta locus	1.58703	0.000584558	0.0024947	1.54906	0.00146851	0.0103109
ENSMUSG00000041605.17	MGI:1921579	Inava	innate immunity activator	1.85336	1.03658e-06	1.01765e-05	1.1313	0.00328138	0.0191941
ENSMUSG00000041642.19	MGI:109234	Kif21b	kinesin family member 21B	1.17232	4.29338e-08	6.59891e-07	0.515275	0.0161392	0.0647426
ENSMUSG00000041734.16	MGI:1891396	Kirrel	kirre like nephrin family adhesion molecule 1	0.905641	0.000309898	0.00143464	-0.258166	0.314245	0.517912
ENSMUSG00000041801.6	MGI:1351485	Phlda3	pleckstrin homology like domain, family A, member 3	1.1756	2.45797e-05	0.000157526	0.489701	0.0814516	0.207111
ENSMUSG00000041840.9	MGI:2385076	Haus1	HAUS augmin-like complex, subunit 1	0.660998	4.39813e-06	3.53864e-05	0.369473	0.0138559	0.0576349
ENSMUSG00000041842.16	MGI:2684972	Fhdc1	FH2 domain containing 1	2.17757	1.5956e-11	7.53036e-10	0.663277	0.0434962	0.132786
ENSMUSG00000041920.15	MGI:2144585	Slc16a6	solute carrier family 16 (monocarboxylic acid transporters), member 6	0.698631	0.00284068	0.00979275	0.478482	0.0423526	0.130088
ENSMUSG00000042079.14	MGI:2138741	Hnrnpf	heterogeneous nuclear ribonucleoprotein F	0.729616	3.17816e-07	3.6631e-06	0.188123	0.190123	0.371787
ENSMUSG00000042099.17	MGI:1098615	Kank3	KN motif and ankyrin repeat domains 3	0.603975	7.41377e-07	7.61369e-06	0.000133188	0.999141	0.999712
ENSMUSG00000042178.7	MGI:2384586	Armc5	armadillo repeat containing 5	0.699035	1.3607e-05	9.36274e-05	0.427509	0.00835896	0.0392585
ENSMUSG00000042215.9	MGI:1891254	Bag2	BCL2-associated athanogene 2	1.29995	2.89465e-10	8.80924e-09	0.12128	0.562901	0.736287
ENSMUSG00000042265.14	MGI:1930005	Trem1	triggering receptor expressed on myeloid cells 1	4.741	0.000741057	0.00305377	1.87619	0.278999	0.479821
ENSMUSG00000042284.11	MGI:96599	Itga1	integrin alpha 1	1.20051	6.12215e-08	8.95303e-07	0.3799	0.0885891	0.220131
ENSMUSG00000042293.9	MGI:3643566	Gm5617	predicted gene 5617	1.07152	0.000257363	0.00121628	0.71632	0.0190555	0.0733805
ENSMUSG00000042320.18	MGI:1920672	Prox2	prospero homeobox 2	0.938494	0.00139524	0.00527617	0.777477	0.0123907	0.0530604
ENSMUSG00000042349.14	MGI:1929612	Ikbke	inhibitor of kappaB kinase epsilon	2.04555	2.55252e-06	2.21628e-05	0.627656	0.157022	0.328087
ENSMUSG00000042367.13	MGI:95721	Gjb3	gap junction protein, beta 3	3.71072	3.88867e-05	0.000234243	-0.427872	0.636676	0.789614
ENSMUSG00000042372.6	MGI:2449470	Dmrt3	doublesex and mab-3 related transcription factor 3	1.69319	4.89485e-05	0.000286434	0.388121	0.353402	0.55705
ENSMUSG00000042377.9	MGI:1916890	Fam83g	family with sequence similarity 83, member G	4.30837	2.88762e-05	0.000181021	0.837669	0.392809	0.595317
ENSMUSG00000042379.9	MGI:1918940	Esm1	endothelial cell-specific molecule 1	6.81633	0.000148562	0.00075269	2.87292	0.106386	0.249694
ENSMUSG00000042401.9	MGI:1920082	Crtac1	cartilage acidic protein 1	1.1702	2.33324e-05	0.000150926	0.0566997	0.837536	0.914631
ENSMUSG00000042436.13	MGI:1342276	Mfap4	microfibrillar-associated protein 4	1.85333	8.48557e-07	8.52599e-06	1.0232	0.00697902	0.0343184
ENSMUSG00000042462.5	MGI:1913672	Dctpp1	dCTP pyrophosphatase 1	0.832272	2.89019e-08	4.70041e-07	0.289635	0.0574489	0.162142
ENSMUSG00000042485.8	MGI:1913425	Mustn1	musculoskeletal, embryonic nuclear protein 1	1.64063	2.48705e-05	0.000159185	0.653903	0.0986092	0.237019
ENSMUSG00000042549.11	MGI:1344334	Map2k3os	mitogen-activated protein kinase kinase 3, opposite strand	1.011	0.000435077	0.00193227	0.260595	0.380297	0.582859
ENSMUSG00000042607.16	MGI:1929751	Asb4	ankyrin repeat and SOCS box-containing 4	1.64948	0.00269921	0.00937103	0.546013	0.309752	0.513426
ENSMUSG00000042622.15	MGI:96910	Maff	v-maf musculoaponeurotic fibrosarcoma oncogene family, protein F (avian)	3.55405	5.27839e-09	1.06976e-07	1.58577	0.0141539	0.0585084
ENSMUSG00000042631.8	MGI:3526711	Xkr7	X-linked Kx blood group related 7	2.2221	3.56351e-09	7.65763e-08	0.877508	0.0320683	0.106715
ENSMUSG00000042644.10	MGI:96624	Itpr3	inositol 1,4,5-triphosphate receptor 3	0.961559	1.83029e-05	0.000121782	0.0425846	0.852828	0.923426
ENSMUSG00000042659.16	MGI:1913662	Arrdc4	arrestin domain containing 4	0.784506	7.76848e-07	7.9002e-06	0.0705296	0.663777	0.807926
ENSMUSG00000042677.8	MGI:2385891	Zc3h12a	zinc finger CCCH type containing 12A	1.7736	1.58558e-05	0.000107403	0.928233	0.0319297	0.106492
ENSMUSG00000042688.17	MGI:1354946	Mapk6	mitogen-activated protein kinase 6	1.02139	6.84697e-07	7.11691e-06	0.294626	0.153431	0.322791
ENSMUSG00000042712.11	MGI:109567	Tceal9	transcription elongation factor A like 9	0.591877	0.000693971	0.00288663	-0.000861446	0.996068	0.998473
ENSMUSG00000042784.10	MGI:97231	Muc1	mucin 1, transmembrane	1.37568	0.000323374	0.00148699	0.850586	0.0309678	0.104111
ENSMUSG00000042804.14	MGI:1916157	Gpr153	G protein-coupled receptor 153	1.57709	4.38746e-07	4.81217e-06	0.94102	0.00277974	0.0169613
ENSMUSG00000042816.5	MGI:2441887	Gpr151	G protein-coupled receptor 151	1.68409	0.00226374	0.00807069	0.948868	0.085222	0.214033
ENSMUSG00000042821.8	MGI:98330	Snai1	snail family zinc finger 1	2.21311	8.17588e-06	6.06063e-05	1.27638	0.0319771	0.10653
ENSMUSG00000042828.13	MGI:3612190	Trim72	tripartite motif-containing 72	3.26058	1.57389e-09	3.78562e-08	1.15825	0.0425554	0.130529
ENSMUSG00000042842.12	MGI:894688	Serpinb6b	serine (or cysteine) peptidase inhibitor, clade B, member 6b	1.65956	5.74612e-06	4.46468e-05	0.58293	0.120964	0.27301
ENSMUSG00000042846.9	MGI:2389177	Lrrtm3	leucine rich repeat transmembrane neuronal 3	0.810242	0.0015136	0.00566517	0.61609	0.0160505	0.0644997
ENSMUSG00000042894.12	MGI:3031094	Olfr1260	olfactory receptor 1260	5.75241	0.00258877	0.00904601	1.59925	0.448705
ENSMUSG00000042961.14	MGI:2146149	Egflam	EGF-like, fibronectin type III and laminin G domains	0.844326	0.000588746	0.00250947	0.394747	0.113905	0.261998
ENSMUSG00000043067.16	MGI:1915685	Dpy19l1	dpy-19-like 1 (C. elegans)	0.930826	1.14091e-06	1.10582e-05	-0.0162594	0.932378	0.967595
ENSMUSG00000043085.15	MGI:2384869	Tmem82	transmembrane protein 82	2.12549	0.000361484	0.00164077	0.0400187	0.946016	0.974805
ENSMUSG00000043091.10	MGI:1095409	Tuba1c	tubulin, alpha 1C	0.895713	1.04051e-11	5.35288e-10	0.286965	0.0294761	0.100316
ENSMUSG00000043099.6	MGI:1338010	Hic1	hypermethylated in cancer 1	1.48813	1.4457e-05	9.87324e-05	0.98424	0.0046836	0.0253486
ENSMUSG00000043131.15	MGI:2442631	Mob1a	MOB kinase activator 1A	1.0059	5.03366e-06	3.97646e-05	0.60213	0.00647473	0.0324899
ENSMUSG00000043144.7	MGI:1341204	Aqp6	aquaporin 6	3.3688	0.00171195	0.00632465	0.12165	0.924552
ENSMUSG00000043230.3	MGI:3026880	Fam124b	family with sequence similarity 124, member B	2.55995	0.00207066	0.00745615	1.09146	0.207338	0.394196
ENSMUSG00000043501.6	MGI:895068	Lgals2	lectin, galactose-binding, soluble 2	2.88062	2.61539e-05	0.000166159	2.7235	0.00654151	0.0327293
ENSMUSG00000043518.8	MGI:1344378	Rai2	retinoic acid induced 2	0.699746	0.00213744	0.00766527	-0.211429	0.361012	0.564062
ENSMUSG00000043770.11	MGI:3650743	Gm12481	predicted gene 12481	0.6465	0.000135941	0.000695821	0.421286	0.0136681	0.0571072
ENSMUSG00000043895.7	MGI:99569	S1pr2	sphingosine-1-phosphate receptor 2	2.47935	4.49464e-15	7.56092e-13	0.925645	0.00383092	0.0216348
ENSMUSG00000043903.5	MGI:2684868	Zfp469	zinc finger protein 469	1.82118	3.57137e-09	7.66253e-08	0.856413	0.00577204	0.0297717
ENSMUSG00000044017.17	MGI:3041203	Adgrd1	adhesion G protein-coupled receptor D1	2.55162	6.15207e-06	4.72786e-05	-0.239516	0.684114	0.822175
ENSMUSG00000044037.16	MGI:2447532	Als2cl	ALS2 C-terminal like	0.792585	0.000162377	0.000813665	0.628082	0.00306742	0.0182806
ENSMUSG00000044086.9	MGI:2444169	Lmod3	leiomodin 3 (fetal)	4.927	0.000157382	0.000791964	-2.43951	0.0846179	0.213038
ENSMUSG00000044147.9	MGI:99435	Arf6	ADP-ribosylation factor 6	0.702379	1.15024e-08	2.11107e-07	0.0946843	0.446721	0.644172
ENSMUSG00000044197.9	MGI:1933113	Gpr146	G protein-coupled receptor 146	0.668602	0.000146892	0.000745609	0.25668	0.147676	0.314276
ENSMUSG00000044254.7	MGI:2140260	Pcsk9	proprotein convertase subtilisin/kexin type 9	2.67138	0.000414838	0.00185319	0.0865366	0.917407	0.959472
ENSMUSG00000044303.7	MGI:104738	Cdkn2a	cyclin dependent kinase inhibitor 2A	3.0865	8.61644e-05	0.000469109	3.7395	0.00184279	0.0123234
ENSMUSG00000044317.8	MGI:2441992	Gpr4	G protein-coupled receptor 4	0.748547	0.00220771	0.0078894	0.0860752	0.727722	0.848543
ENSMUSG00000044322.8	MGI:109173	Dsc1	desmocollin 1	3.44119	0.000113401	0.00059352	-1.7319	0.139474	0.301564
ENSMUSG00000044338.10	MGI:1346086	Aplnr	apelin receptor	2.77042	3.86073e-07	4.3191e-06	1.49472	0.00883887	0.0409985
ENSMUSG00000044456.17	MGI:2385708	Rin3	Ras and Rab interactor 3	1.65684	1.32259e-05	9.13487e-05	1.11938	0.00391451	0.0219829
ENSMUSG00000044522.9	MGI:2442643	A730020M07Rik	RIKEN cDNA A730020M07 gene	1.98902	2.64621e-05	0.000167689	0.770299	0.115579	0.264707
ENSMUSG00000044533.16	MGI:105110	Rps2	ribosomal protein S2	0.659334	2.47518e-10	7.7388e-09	0.160985	0.123204	0.27641
ENSMUSG00000044562.13	MGI:1917153	Rasip1	Ras interacting protein 1	0.818185	6.23949e-06	4.78164e-05	0.193679	0.293368	0.496295
ENSMUSG00000044609.7	MGI:3648888	Gm9294	predicted pseudogene 9294	0.71775	2.0107e-05	0.000132064	0.385566	0.0269556	0.093987
ENSMUSG00000044641.8	MGI:2135605	Pard6b	par-6 family cell polarity regulator beta	0.645897	5.4448e-05	0.000314972	0.191557	0.241686	0.436936
ENSMUSG00000044674.7	MGI:1196625	Fzd1	frizzled class receptor 1	1.58114	1.37581e-09	3.38034e-08	0.255353	0.331939	0.536012
ENSMUSG00000044689.6	MGI:3649721	Gm13749	predicted gene 13749	3.84092	0.000112361	0.000588864	2.64424	0.00732803	0.0354759
ENSMUSG00000044702.14	MGI:3040695	Palb2	partner and localizer of BRCA2	0.836489	0.000189925	0.000935133	0.599679	0.0142217	0.0587262
ENSMUSG00000044757.8	MGI:3648857	Gm6430	predicted gene 6430	0.630891	1.8698e-05	0.00012396	0.197545	0.190485	0.372283
ENSMUSG00000044813.16	MGI:98294	Shb	src homology 2 domain-containing transforming protein B	0.889042	0.00227975	0.00812145	0.302101	0.305436	0.508729
ENSMUSG00000044864.17	MGI:2139777	Ankrd50	ankyrin repeat domain 50	0.784752	0.000743531	0.00306227	0.175306	0.451954	0.648404
ENSMUSG00000044881.8	MGI:1915435	Coa4	cytochrome c oxidase assembly factor 4	0.943571	2.17977e-05	0.00014197	0.701705	0.0026029	0.0161446
ENSMUSG00000044933.4	MGI:98329	Sstr3	somatostatin receptor 3	0.901524	0.000287109	0.00134069	0.163686	0.510033	0.695554
ENSMUSG00000045055.6	MGI:3643356	Rpsa-ps2	ribosomal protein SA, pseudogene 2	0.61628	4.63155e-07	5.03957e-06	0.238306	0.0543512	0.155643
ENSMUSG00000045136.7	MGI:1920960	Tubb2b	tubulin, beta 2B class IIB	0.841014	4.82536e-12	2.75649e-10	0.286903	0.0184618	0.0716756
ENSMUSG00000045165.7	MGI:2141979	AI467606	expressed sequence AI467606	1.512	2.49212e-05	0.000159435	0.953427	0.00931715	0.0426654
ENSMUSG00000045257.11	MGI:2674071	Morn2	MORN repeat containing 2	0.59266	0.000166105	0.000830981	0.236282	0.140634	0.303418
ENSMUSG00000045314.6	MGI:1925338	Sowahb	sosondowah ankyrin repeat domain family member B	3.20713	4.94371e-05	0.000288971	-0.374787	0.637647	0.790028
ENSMUSG00000045328.12	MGI:1098230	Cenpe	centromere protein E	2.12266	1.13981e-11	5.7012e-10	0.988384	0.0019551	0.0128845
ENSMUSG00000045362.9	MGI:2651928	Tnfrsf26	tumor necrosis factor receptor superfamily, member 26	2.14142	0.00239782	0.00847053	0.839149	0.413194	0.614892
ENSMUSG00000045374.19	MGI:2681828	Wdr81	WD repeat domain 81	0.759639	1.17796e-05	8.26499e-05	0.541204	0.00189263	0.0125693
ENSMUSG00000045382.7	MGI:109563	Cxcr4	chemokine (C-X-C motif) receptor 4	1.53214	1.73827e-05	0.000116537	0.52217	0.148142	0.314818
ENSMUSG00000045404.17	MGI:2384976	Kcnk13	potassium channel, subfamily K, member 13	1.50468	1.68207e-07	2.12839e-06	0.7671	0.0085475	0.0399709
ENSMUSG00000045532.6	MGI:1344400	C1ql1	complement component 1, q subcomponent-like 1	1.21328	1.73693e-06	1.58454e-05	0.703343	0.00626105	0.0316622
ENSMUSG00000045534.5	MGI:96662	Kcna5	potassium voltage-gated channel, shaker-related subfamily, member 5	1.09416	0.00178308	0.00655478	0.397497	0.265971	0.465067
ENSMUSG00000045545.9	MGI:96688	Krt14	keratin 14	6.50817	0.000773775	0.00316859	3.04795	0.117811
ENSMUSG00000045594.11	MGI:88151	Glb1	galactosidase, beta 1	1.09902	1.908e-05	0.000126066	0.468144	0.0695366	0.18581
ENSMUSG00000045659.19	MGI:2445094	Plekha7	pleckstrin homology domain containing, family A member 7	1.24912	6.7569e-06	5.12231e-05	-0.190869	0.493024	0.68245
ENSMUSG00000045679.15	MGI:2444067	Pqlc3	PQ loop repeat containing	3.47719	7.80387e-08	1.10687e-06	1.07045	0.116286	0.265695
ENSMUSG00000045826.10	MGI:97811	Ptprcap	protein tyrosine phosphatase, receptor type, C polypeptide-associated protein	0.620192	0.000152179	0.000768776	0.499396	0.00270729	0.0166035
ENSMUSG00000045868.13	MGI:1921808	Gvin1	GTPase, very large interferon inducible 1	1.78707	3.82883e-07	4.28867e-06	0.765162	0.0306762	0.103347
ENSMUSG00000045903.10	MGI:2664186	Npas4	neuronal PAS domain protein 4	3.21794	3.1719e-07	3.65742e-06	-0.425605	0.501148	0.689014
ENSMUSG00000045912.10	MGI:2685084	C2cd4c	C2 calcium-dependent domain containing 4C	1.28008	7.02774e-05	0.000394071	0.732392	0.0224954	0.0826083
ENSMUSG00000045917.18	MGI:1913920	Tmem268	transmembrane protein 268	0.750172	0.000374917	0.00169529	0.614524	0.00376433	0.0213439
ENSMUSG00000045930.4	MGI:1914114	Clec14a	C-type lectin domain family 14, member a	1.63786	7.9569e-09	1.53122e-07	0.478023	0.095901	0.232532
ENSMUSG00000045980.14	MGI:2444222	Tmem104	transmembrane protein 104	0.734072	5.1867e-05	0.000301568	0.300329	0.100285	0.239609
ENSMUSG00000046057.5	MGI:3642670	Gm15428	predicted pseudogene 15428	2.41523	0.00281899	0.00972407	3.43573	0.00332468	0.0193438
ENSMUSG00000046207.15	MGI:2144613	Pik3r6	phosphoinositide-3-kinase regulatory subunit 5	1.00243	0.000382114	0.00172215	0.853345	0.00272117	0.0166844
ENSMUSG00000046321.9	MGI:1333802	Hs3st2	heparan sulfate (glucosamine) 3-O-sulfotransferase 2	2.55319	0.000246453	0.00117179	-1.55006	0.0265141	0.092865
ENSMUSG00000046546.4	MGI:2676309	Fam43a	family with sequence similarity 43, member A	2.25494	1.32339e-10	4.54159e-09	0.820246	0.020023	0.0758786
ENSMUSG00000046585.10	MGI:2685815	Cfap58	cilia and flagella associated protein 58	3.01614	0.000232552	0.00111284	-1.5781	0.0905837	0.223563
ENSMUSG00000046589.8	MGI:1919517	Lrrc8e	leucine rich repeat containing 8 family, member E	4.35985	0.00082245	0.00334052	3.63493	0.00730514
ENSMUSG00000046731.6	MGI:2448712	Kctd11	potassium channel tetramerisation domain containing 11	1.11979	0.000345137	0.0015757	0.886413	0.00664796	0.0331103
ENSMUSG00000046761.14	MGI:2145900	Fam83h	family with sequence similarity 83, member H	1.72686	0.000111773	0.000586454	1.01657	0.0224505	0.08249
ENSMUSG00000046794.10	MGI:2177268	Ppp1r3b	protein phosphatase 1, regulatory subunit 3B	2.38724	1.19325e-07	1.58676e-06	1.24633	0.00676991	0.0335233
ENSMUSG00000046818.8	MGI:1920534	Ddit4l	DNA-damage-inducible transcript 4-like	0.77765	3.11018e-05	0.000192857	0.0911335	0.62907	0.784006
ENSMUSG00000046908.6	MGI:1309472	Ltb4r1	leukotriene B4 receptor 1	2.53093	0.000589211	0.00251106	2.17863	0.0279506	0.0965599
ENSMUSG00000046916.10	MGI:1915882	Myct1	myc target 1	1.25125	0.00253948	0.008901	0.643144	0.129054	0.285532
ENSMUSG00000046949.17	MGI:104513	Nqo2	N-ribosyldihydronicotinamide quinone reductase 2	0.75734	2.66838e-05	0.000168977	0.428347	0.018567	0.0719603
ENSMUSG00000047123.9	MGI:2147032	Ticam1	toll-like receptor adaptor molecule 1	0.846611	0.000390967	0.00175825	0.71325	0.00326031	0.019094
ENSMUSG00000047139.10	MGI:88323	Cd24a	CD24a antigen	1.3137	2.28103e-05	0.000147967	-0.125276	0.689016	0.825019
ENSMUSG00000047242.15	MGI:3039562	Taf9b	TATA-box binding protein associated factor 9B	0.764778	1.29532e-06	1.23411e-05	0.219159	0.16706	0.341404
ENSMUSG00000047281.4	MGI:1891831	Sfn	stratifin	0.903324	0.00157517	0.00586994	0.750224	0.0082823	0.038981
ENSMUSG00000047497.11	MGI:2146046	Adamts12	a disintegrin-like and metallopeptidase (reprolysin type) with thrombospondin type 1 motif, 12	2.108	0.00126108	0.00484432	0.612787	0.352261	0.556164
ENSMUSG00000047592.18	MGI:3584036	Nxpe5	neurexophilin and PC-esterase domain family, member 5	4.62086	0.000145004	0.000737663	3.72729	0.00862149	0.0402386
ENSMUSG00000047606.5	MGI:2685617	Ankrd34c	ankyrin repeat domain 34C	3.89032	1.66969e-08	2.92917e-07	-1.01578	0.146316	0.312201
ENSMUSG00000047676.7	MGI:3704228	Rpsa-ps10	ribosomal protein SA, pseudogene 10	0.600198	2.13131e-07	2.61596e-06	0.260071	0.0256572	0.0906694
ENSMUSG00000047735.15	MGI:1343184	Samd9l	sterile alpha motif domain containing 9-like	2.09934	2.66364e-09	6.01623e-08	0.630477	0.0760766	0.197547
ENSMUSG00000047797.15	MGI:95719	Gjb1	gap junction protein, beta 1	1.34295	1.59531e-06	1.47582e-05	0.856896	0.00230893	0.0146649
ENSMUSG00000047810.10	MGI:1925567	Ccdc88b	coiled-coil domain containing 88B	1.31547	0.000169704	0.000847129	0.810893	0.0220209	0.0813093
ENSMUSG00000047821.17	MGI:2137356	Trim16	tripartite motif-containing 16	0.757446	0.00172882	0.00637753	0.369225	0.147162	0.313422
ENSMUSG00000047875.7	MGI:2442046	Gpr157	G protein-coupled receptor 157	2.22715	3.57801e-07	4.04907e-06	1.33688	0.00288298	0.0174584
ENSMUSG00000048120.17	MGI:102805	Entpd1	ectonucleoside triphosphate diphosphohydrolase 1	0.82415	0.00152132	0.0056894	0.777734	0.0029113	0.0175882
ENSMUSG00000048164.10	MGI:3645884	Gm7204	predicted pseudogene 7204	0.749543	0.0001642	0.00082193	0.419676	0.0419146	0.129284
ENSMUSG00000048200.13	MGI:2446129	Cracr2b	calcium release activated channel regulator 2B	1.18375	0.000591205	0.00251838	0.958113	0.00592676	0.0303677
ENSMUSG00000048285.10	MGI:2442579	Frmd6	FERM domain containing 6	0.866931	5.02491e-07	5.416e-06	0.256917	0.137496	0.2985
ENSMUSG00000048332.14	MGI:1920048	Lhfp	lipoma HMGIC fusion partner	1.36337	2.86621e-05	0.000179925	0.945341	0.003817	0.0215713
ENSMUSG00000048355.3	MGI:1923469	Arxes1	adipocyte-related X-chromosome expressed sequence 1	0.920471	9.73866e-05	0.000521653	-0.121928	0.606965	0.76766
ENSMUSG00000048440.17	MGI:1917351	Cyp4f16	cytochrome P450, family 4, subfamily f, polypeptide 16	1.00766	3.39059e-06	2.82241e-05	0.370904	0.0934028	0.228185
ENSMUSG00000048482.15	MGI:88145	Bdnf	brain derived neurotrophic factor	1.82908	7.80322e-06	5.82256e-05	0.746719	0.0681374	0.183252
ENSMUSG00000048534.8	MGI:2685484	Jaml	junction adhesion molecule like	2.25317	0.000648247	0.00272329	0.719321	0.269186	0.468643
ENSMUSG00000048600.8	MGI:3647841	Gm5763	predicted pseudogene 5763	0.989489	0.00140703	0.00531414	0.388231	0.222606	0.413097
ENSMUSG00000048612.17	MGI:1919192	Myof	myoferlin	2.7093	1.53415e-06	1.42453e-05	-0.324027	0.565984	0.738579
ENSMUSG00000048616.5	MGI:104327	Nog	noggin	1.01077	0.000308101	0.00142729	-0.620089	0.0282346	0.097359
ENSMUSG00000048677.10	MGI:2385297	Tpcn2	two pore segment channel 2	1.85902	6.47594e-07	6.7782e-06	1.09976	0.00334158	0.0194186
ENSMUSG00000048721.3	MGI:2443410	Fndc9	fibronectin type III domain containing 9	6.13443	1.99549e-19	1.30277e-16	1.1499	0.0863692	0.216067
ENSMUSG00000048915.13	MGI:107444	Efna5	ephrin A5	1.84493	0.000182585	0.000903373	-0.823236	0.0980466	0.236139
ENSMUSG00000048924.15	MGI:1923291	Ccdc125	coiled-coil domain containing 125	1.33721	0.000717446	0.00296941	0.525804	0.227448	0.419204
ENSMUSG00000048965.10	MGI:2441884	Mrgpre	MAS-related GPR, member E	0.722872	0.00237655	0.00840838	0.220912	0.351148	0.555026
ENSMUSG00000049037.9	MGI:3036291	Clec4a1	C-type lectin domain family 4, member a1	1.75725	0.000557461	0.00239549	1.64084	0.00665217	0.0331176
ENSMUSG00000049112.10	MGI:109147	Oxtr	oxytocin receptor	1.75248	0.00121202	0.00468277	-0.781539	0.147022	0.313264
ENSMUSG00000049134.16	MGI:1098765	Nrap	nebulin-related anchoring protein	3.59278	9.53301e-08	1.31222e-06	0.72148	0.313636	0.51744
ENSMUSG00000049191.13	MGI:3045324	Rtl5	retrotransposon Gag like 5	0.983178	1.11344e-07	1.49367e-06	0.0998495	0.591758	0.758218
ENSMUSG00000049285.5	MGI:2679717	Mblac1	metallo-beta-lactamase domain containing 1	0.718531	2.54822e-05	0.000162342	0.262018	0.121888	0.274285
ENSMUSG00000049327.18	MGI:1915206	Kmt5a	lysine methyltransferase 5A	0.77397	3.5786e-10	1.06081e-08	0.184791	0.136207	0.296661
ENSMUSG00000049401.11	MGI:1919325	Ogfr	opioid growth factor receptor	0.606629	3.306e-07	3.78499e-06	0.323585	0.0068413	0.0338002
ENSMUSG00000049409.10	MGI:1929676	Prokr1	prokineticin receptor 1	3.57908	5.05056e-06	3.98751e-05	2.71063	0.00209209	0.0135569
ENSMUSG00000049411.16	MGI:2442435	Tmem241	transmembrane protein 241	0.836804	6.47081e-08	9.40274e-07	0.486157	0.00221311	0.0141692
ENSMUSG00000049439.14	MGI:1925201	Cyp20a1	cytochrome P450, family 20, subfamily a, polypeptide 1	0.635878	2.06224e-05	0.00013515	0.280703	0.0650625	0.177022
ENSMUSG00000049521.3	MGI:1929763	Cdc42ep1	CDC42 effector protein (Rho GTPase binding) 1	1.53925	9.1091e-13	6.82436e-11	0.641046	0.00312388	0.018559
ENSMUSG00000049556.6	MGI:1915522	Lingo1	leucine rich repeat and Ig domain containing 1	1.06777	0.000123391	0.00063854	0.162866	0.55823	0.733018
ENSMUSG00000049560.5	MGI:2442320	Defb20	defensin beta 20	4.87859	0.000214784	0.00104108	1.95162	0.113031
ENSMUSG00000049562.7	MGI:2685808	Ap5b1	adaptor-related protein complex 5, beta 1 subunit	0.791754	0.000126841	0.000653963	0.437708	0.0374325	0.1194
ENSMUSG00000049608.10	MGI:2685064	Gpr55	G protein-coupled receptor 55	2.67388	0.000139965	0.000714548	1.14527	0.0696539	0.186061
ENSMUSG00000049641.16	MGI:2447460	Vgll2	vestigial like family member 2	4.23728	5.41641e-06	4.24579e-05	1.33287	0.225643	0.416707
ENSMUSG00000049649.9	MGI:101908	Gpr3	G-protein coupled receptor 3	1.51971	6.22522e-05	0.00035414	-0.22656	0.555511	0.730422
ENSMUSG00000049699.5	MGI:2176375	Ucn2	urocortin 2	3.15542	2.58683e-05	0.000164573	2.98466	0.00466596	0.0252816
ENSMUSG00000049719.15	MGI:1921556	Prss46	protease, serine 46	4.89375	0.000842798	0.00341352	1.58211	0.336193
ENSMUSG00000049723.15	MGI:97005	Mmp12	matrix metallopeptidase 12	4.81659	3.74061e-05	0.000226219	1.56861	0.341411	0.545512
ENSMUSG00000049871.15	MGI:2444070	Nlrc3	NLR family, CARD domain containing 3	2.91707	1.44172e-09	3.50771e-08	1.02903	0.0349275	0.113467
ENSMUSG00000049881.14	MGI:1917203	2810025M15Rik	RIKEN cDNA 2810025M15 gene	1.14706	3.64526e-05	0.000221184	0.60968	0.029175	0.0996181
ENSMUSG00000049932.4	MGI:102688	H2ax	H2A.X variant histone	0.65767	5.70184e-07	6.04814e-06	0.130605	0.327731	0.531527
ENSMUSG00000049969.4	MGI:1919051	Plekhf2	pleckstrin homology domain containing, family F (with FYVE domain) member 2	1.00418	1.2275e-07	1.62678e-06	0.443904	0.0218608	0.0809169
ENSMUSG00000050014.9	MGI:3043522	Apol10b	apolipoprotein L 10B	1.48811	0.000935091	0.00373165	0.0114224	0.980536	0.99159
ENSMUSG00000050022.17	MGI:2442258	Amz1	archaelysin family metallopeptidase 1	2.00496	4.32004e-07	4.75534e-06	1.20794	0.00239795	0.0151469
ENSMUSG00000050069.4	MGI:1344367	Grem2	gremlin 2, DAN family BMP antagonist	1.96979	4.31115e-08	6.6188e-07	0.418064	0.24457	0.440728
ENSMUSG00000050075.9	MGI:2442043	Gpr171	G protein-coupled receptor 171	5.38415	0.00127347	0.00488615	0.581478	0.765448
ENSMUSG00000050105.6	MGI:1919940	Fam110d	family with sequence similarity 110, member D	1.82387	4.94157e-06	3.91952e-05	0.856385	0.0361852	0.116659
ENSMUSG00000050106.19	MGI:2669037	Tmc8	transmembrane channel-like gene family 8	1.59423	8.70755e-06	6.39596e-05	1.00943	0.00646844	0.0324749
ENSMUSG00000050232.7	MGI:1277207	Cxcr3	chemokine (C-X-C motif) receptor 3	4.06155	0.00177532	0.0065315	-0.683673	0.558181
ENSMUSG00000050234.8	MGI:95715	Gja4	gap junction protein, alpha 4	0.887888	0.000849986	0.00343756	0.208205	0.444722	0.642599
ENSMUSG00000050271.13	MGI:1196223	Prag1	PEAK1 related kinase activating pseudokinase 1	0.763739	0.00120329	0.00465199	0.176637	0.452881	0.648966
ENSMUSG00000050370.6	MGI:1333869	Ch25h	cholesterol 25-hydroxylase	5.36106	2.03576e-11	9.16594e-10	2.40576	0.00362967	0.0207123
ENSMUSG00000050382.15	MGI:1098239	Kif7	kinesin family member 7	0.623248	0.000245656	0.00116841	0.544086	0.00245044	0.0154056
ENSMUSG00000050533.4	MGI:3704215	Gm9845	predicted pseudogene 9845	1.0328	0.00130175	0.00497478	0.442261	0.183317	0.363325
ENSMUSG00000050619.15	MGI:2139317	Zscan29	zinc finger SCAN domains 29	0.708384	0.00115054	0.00447868	0.463308	0.0359554	0.116074
ENSMUSG00000050708.17	MGI:95589	Ftl1	ferritin light polypeptide 1	1.92218	7.85748e-11	2.88038e-09	0.865847	0.00342347	0.0197687
ENSMUSG00000050711.8	MGI:103033	Scg2	secretogranin II	1.81603	3.32723e-06	2.77746e-05	0.738452	0.0587018	0.164635
ENSMUSG00000050721.10	MGI:2143132	Plekho2	pleckstrin homology domain containing, family O member 2	0.996432	4.12448e-06	3.34101e-05	0.137545	0.527915	0.709385
ENSMUSG00000050737.14	MGI:1927593	Ptges	prostaglandin E synthase	1.00666	8.33212e-06	6.15498e-05	0.718811	0.00233536	0.014806
ENSMUSG00000050860.7	MGI:2447348	Phospho1	phosphatase, orphan 1	1.2373	5.0095e-07	5.40151e-06	0.0623469	0.800916	0.894367
ENSMUSG00000050912.16	MGI:1919179	Tmem123	transmembrane protein 123	1.08778	7.7351e-07	7.87584e-06	0.559955	0.0115114	0.050135
ENSMUSG00000050961.5	MGI:2682312	AY358078	cDNA sequence AY358078	3.68959	0.00289932	0.00996733	1.56298	0.189645
ENSMUSG00000050989.11	MGI:2151208	Selenon	selenoprotein N	0.920153	2.99041e-07	3.4774e-06	0.499364	0.00574339	0.0296557
ENSMUSG00000051136.2	MGI:2441906	Ghsr	growth hormone secretagogue receptor	1.68718	0.00074286	0.00306074	-0.619414	0.234057	0.428045
ENSMUSG00000051147.11	MGI:109201	Nat2	N-acetyltransferase 2 (arylamine N-acetyltransferase)	1.20262	0.000911537	0.00364934	1.15068	0.00266607	0.0164388
ENSMUSG00000051159.17	MGI:108023	Cited1	Cbp/p300-interacting transactivator with Glu/Asp-rich carboxy-terminal domain 1	1.59351	9.4085e-06	6.843e-05	0.673075	0.0736992	0.193555
ENSMUSG00000051212.9	MGI:2442034	Gpr183	G protein-coupled receptor 183	1.59274	2.17331e-05	0.000141683	1.1008	0.00489681	0.0261784
ENSMUSG00000051235.11	MGI:2443149	Gen1	GEN1, Holliday junction 5' flap endonuclease	1.08889	2.50658e-05	0.000160173	0.227713	0.399745	0.602261
ENSMUSG00000051236.14	MGI:2443538	Msrb3	methionine sulfoxide reductase B3	0.906465	6.51471e-05	0.000368468	0.313719	0.169305	0.344675
ENSMUSG00000051242.2	MGI:2136744	Pcdhb9	protocadherin beta 9	0.595655	0.000475107	0.00208506	0.415005	0.0155787	0.0629989
ENSMUSG00000051427.15	MGI:3041210	Ccdc157	coiled-coil domain containing 157	0.606027	9.56582e-06	6.94453e-05	0.38328	0.0053832	0.0281955
ENSMUSG00000051456.5	MGI:1928479	Hspb3	heat shock protein 3	3.2226	5.47635e-07	5.84741e-06	1.82557	0.0066817	0.0332233
ENSMUSG00000051639.4	MGI:3644887	Fbl-ps2	fibrillarin, pseudogene 2	0.611041	0.000242555	0.00115506	0.152184	0.381103	0.583313
ENSMUSG00000051669.7	MGI:2146559	AU021092	expressed sequence AU021092	1.22846	8.70988e-08	1.21478e-06	0.291125	0.208385	0.395625
ENSMUSG00000051726.7	MGI:2687399	Kcnf1	potassium voltage-gated channel, subfamily F, member 1	1.72638	6.5784e-05	0.000371764	-0.918108	0.0340788	0.111331
ENSMUSG00000051735.8	MGI:2444024	Rinl	Ras and Rab interactor-like	1.8291	3.30029e-07	3.78211e-06	1.15065	0.00166746	0.0113982
ENSMUSG00000051811.15	MGI:3044182	Cox6b2	cytochrome c oxidase subunit 6B2	1.71823	2.45493e-05	0.000157423	0.948282	0.022617	0.0828232
ENSMUSG00000051855.16	MGI:96968	Mest	mesoderm specific transcript	1.02062	0.00271412	0.00941205	-0.23365	0.49253	0.682043
ENSMUSG00000052102.16	MGI:1347054	Gnpda1	glucosamine-6-phosphate deaminase 1	1.00738	3.04635e-07	3.53495e-06	0.503198	0.0110645	0.0486738
ENSMUSG00000052151.13	MGI:1354945	Plpp2	phospholipid phosphatase 2	1.34123	0.000204611	0.000997419	0.908408	0.0123105	0.0528211
ENSMUSG00000052248.18	MGI:3652108	Zeb2os	zinc finger E-box binding homeobox 2, opposite strand	0.81285	0.0026926	0.00935044	0.828379	0.00261788	0.0162249
ENSMUSG00000052384.15	MGI:2445095	Nrros	negative regulator of reactive oxygen species	1.52072	1.8761e-06	1.69442e-05	0.447375	0.16407	0.337295
ENSMUSG00000052477.16	MGI:3612702	C130026I21Rik	RIKEN cDNA C130026I21 gene	2.03118	0.00178295	0.00655478	2.13574	0.00674886	0.0334397
ENSMUSG00000052533.15	MGI:2446190	Nup188	nucleoporin 188	0.640138	8.21689e-12	4.46152e-10	0.212113	0.025389	0.090066
ENSMUSG00000052613.17	MGI:1891428	Pcdh15	protocadherin 15	1.37611	8.67536e-06	6.37573e-05	0.31948	0.301746	0.504986
ENSMUSG00000052681.9	MGI:894315	Rap1b	RAS related protein 1b	0.781973	3.96618e-06	3.22995e-05	0.258155	0.128695	0.284997
ENSMUSG00000052837.8	MGI:96647	Junb	jun B proto-oncogene	1.94591	5.97042e-12	3.32742e-10	0.805682	0.00461811	0.0250675
ENSMUSG00000052957.9	MGI:95655	Gas1	growth arrest specific 1	0.873074	0.000845597	0.00342182	0.158365	0.550397	0.726759
ENSMUSG00000053012.18	MGI:1889377	Krcc1	lysine-rich coiled-coil 1	0.97965	2.92199e-07	3.41522e-06	0.572313	0.0029878	0.0179171
ENSMUSG00000053063.12	MGI:3040968	Clec12a	C-type lectin domain family 12, member a	4.23673	3.07749e-05	0.000191262	1.77139	0.133278	0.292081
ENSMUSG00000053110.14	MGI:103262	Yap1	yes-associated protein 1	0.699787	3.11739e-08	5.0253e-07	0.177091	0.16601	0.340097
ENSMUSG00000053166.15	MGI:1341843	Cdh22	cadherin 22	2.97905	3.17588e-18	1.26207e-15	0.942894	0.00591336	0.0303306
ENSMUSG00000053198.15	MGI:108176	Prx	periaxin	1.47777	2.44858e-05	0.00015709	0.704234	0.0607734	0.168557
ENSMUSG00000053317.12	MGI:1913462	Sec61b	Sec61 beta subunit	0.881077	4.16033e-09	8.72013e-08	0.337459	0.0262228	0.0920997
ENSMUSG00000053399.10	MGI:2442600	Adamts18	a disintegrin-like and metallopeptidase (reprolysin type) with thrombospondin type 1 motif, 18	1.09508	0.00274098	0.00949321	0.563645	0.133192	0.291947
ENSMUSG00000053541.4	MGI:3647753	Gvin-ps6	GTPase, very large interferon inducible, pseudogene 6	2.38693	0.00255062	0.00893321	0.963681	0.227843	0.419802
ENSMUSG00000053559.14	MGI:2448476	Smagp	small cell adhesion glycoprotein	1.35445	0.000221424	0.00106779	0.535967	0.153622	0.322977
ENSMUSG00000053560.6	MGI:104815	Ier2	immediate early response 2	2.09124	9.30302e-10	2.40877e-08	0.596582	0.0887638	0.220429
ENSMUSG00000053626.6	MGI:106923	Tll1	tolloid-like	2.73266	8.36632e-06	6.17675e-05	0.167602	0.78533	0.88496
ENSMUSG00000053687.16	MGI:2442042	Dpep2	dipeptidase 2	5.1308	1.30991e-06	1.24455e-05	3.10068	0.0325058	0.107649
ENSMUSG00000053746.9	MGI:1913779	Ptrh1	peptidyl-tRNA hydrolase 1 homolog	1.55692	4.22019e-10	1.21808e-08	0.455703	0.0775906	0.200038
ENSMUSG00000053886.5	MGI:1919531	Sh2d4a	SH2 domain containing 4A	4.01344	0.000817509	0.00332435	2.1866	0.0767129
ENSMUSG00000054003.14	MGI:1921941	Tdrd9	tudor domain containing 9	2.76653	0.00022536	0.00108391	1.22495	0.149219	0.316422
ENSMUSG00000054072.13	MGI:1926259	Iigp1	interferon inducible GTPase 1	1.67134	3.27387e-06	2.7444e-05	0.335579	0.356232	0.55946
ENSMUSG00000054150.13	MGI:2442408	Syne3	spectrin repeat containing, nuclear envelope family member 3	1.51089	7.4841e-10	2.00404e-08	0.822182	0.00170676	0.0116041
ENSMUSG00000054196.8	MGI:1915838	Cthrc1	collagen triple helix repeat containing 1	1.36579	0.000173666	0.000864858	0.844531	0.0220636	0.0814046
ENSMUSG00000054203.8	MGI:101847	Ifi205	interferon activated gene 205	3.19587	5.4967e-07	5.86457e-06	1.08087	0.0968894	0.234291
ENSMUSG00000054342.9	MGI:1277957	Kcnn4	potassium intermediate/small conductance calcium-activated channel, subfamily N, member 4	4.12978	1.89401e-08	3.25717e-07	2.06529	0.016458	0.0656176
ENSMUSG00000054400.17	MGI:1922708	Cklf	chemokine-like factor	1.02847	2.11546e-05	0.000138175	0.180979	0.462058	0.656909
ENSMUSG00000054404.14	MGI:1329004	Slfn5	schlafen 5	1.86978	2.3537e-07	2.83935e-06	0.744468	0.04013	0.125441
ENSMUSG00000054435.17	MGI:1349656	Gimap4	GTPase, IMAP family member 4	2.07036	0.000269742	0.00126758	0.990953	0.107627	0.251993
ENSMUSG00000054509.8	MGI:2685589	Parp4	poly (ADP-ribose) polymerase family, member 4	0.959621	1.64634e-05	0.000110943	0.493906	0.0289237	0.0990432
ENSMUSG00000054555.12	MGI:105378	Adam12	a disintegrin and metallopeptidase domain 12 (meltrin alpha)	2.53235	1.15377e-12	8.23863e-11	0.413795	0.250139	0.44724
ENSMUSG00000054580.15	MGI:102468	Pla2r1	phospholipase A2 receptor 1	1.39173	0.000516524	0.00224277	0.0409636	0.921861	0.962253
ENSMUSG00000054612.5	MGI:96977	Mgmt	O-6-methylguanine-DNA methyltransferase	1.61146	3.81176e-05	0.000230267	1.18623	0.00459953	0.0249836
ENSMUSG00000054690.18	MGI:1891716	Emcn	endomucin	0.864777	1.47758e-08	2.63772e-07	0.181951	0.242722	0.438249
ENSMUSG00000054702.15	MGI:1891304	Ap1s3	adaptor-related protein complex AP-1, sigma 3	1.32318	0.000182626	0.000903412	-0.267369	0.455012	0.65074
ENSMUSG00000054808.16	MGI:1890773	Actn4	actinin alpha 4	0.694485	2.15546e-13	1.98402e-11	0.167684	0.0775281	0.199963
ENSMUSG00000054901.8	MGI:2685787	Arhgef33	Rho guanine nucleotide exchange factor (GEF) 33	1.63597	1.27956e-06	1.22196e-05	0.99649	0.00323945	0.0190006
ENSMUSG00000054932.7	MGI:87951	Afp	alpha fetoprotein	3.19444	9.07003e-05	0.000490146	2.60326	0.00458608	0.0249161
ENSMUSG00000054958.7	MGI:2155700	Nt5c1a	5'-nucleotidase, cytosolic IA	1.06754	3.12578e-06	2.63396e-05	0.331448	0.151428	0.319958
ENSMUSG00000054999.3	MGI:2685810	Naaladl1	N-acetylated alpha-linked acidic dipeptidase-like 1	2.16525	0.00128827	0.00493356	1.33396	0.0443591	0.134519
ENSMUSG00000055172.11	MGI:1355313	C1ra	complement component 1, r subcomponent A	2.06612	1.56777e-05	0.000106275	1.19687	0.0129754	0.0548326
ENSMUSG00000055200.8	MGI:2180697	Sertad3	SERTA domain containing 3	0.770501	0.000331409	0.00152087	0.686804	0.00248236	0.0155453
ENSMUSG00000055523.8	MGI:106025	Gucy2g	guanylate cyclase 2g	1.17881	2.4933e-05	0.000159449	0.789182	0.0051742	0.0273804
ENSMUSG00000055612.16	MGI:1914203	Cdca7	cell division cycle associated 7	0.837906	4.97986e-05	0.00029075	0.105847	0.627851	0.783014
ENSMUSG00000055737.13	MGI:95708	Ghr	growth hormone receptor	0.723166	9.26094e-06	6.7482e-05	0.0957892	0.562389	0.735844
ENSMUSG00000055799.14	MGI:1202876	Tcf7l1	transcription factor 7 like 1 (T cell specific, HMG box)	1.01806	4.50868e-06	3.61803e-05	0.687361	0.0022802	0.0145291
ENSMUSG00000055865.9	MGI:3046463	Tafa3	TAFA chemokine like family member 3	3.55704	1.25457e-06	1.20365e-05	1.28102	0.091429	0.224955
ENSMUSG00000055994.16	MGI:2429397	Nod2	nucleotide-binding oligomerization domain containing 2	1.56836	0.00192846	0.00701024	0.772551	0.125715	0.280172
ENSMUSG00000056116.19	MGI:95956	H2-T22	histocompatibility 2, T region locus 22	0.947507	9.34442e-06	6.80361e-05	0.466169	0.030284	0.102335
ENSMUSG00000056209.8	MGI:894653	Npm3	nucleoplasmin 3	0.603452	0.00160056	0.00595488	-0.167731	0.388748	0.591272
ENSMUSG00000056313.6	MGI:1916318	Tcim	transcriptional and immune response regulator	1.95564	0.000559894	0.00240405	0.537956	0.351811	0.555746
ENSMUSG00000056481.8	MGI:1917695	Cd248	CD248 antigen, endosialin	2.21371	5.79255e-13	4.65782e-11	0.694516	0.0260949	0.0917576
ENSMUSG00000056498.14	MGI:2444725	Tmem154	transmembrane protein 154	2.41765	1.53437e-05	0.000104294	1.82007	0.00318256	0.0187805
ENSMUSG00000056531.12	MGI:1922974	Ccdc18	coiled-coil domain containing 18	0.770727	0.000198509	0.000971293	0.219816	0.320858	0.524745
ENSMUSG00000056671.8	MGI:1924869	Prelid2	PRELI domain containing 2	2.28587	0.000672531	0.00281067	1.50049	0.0240601	0.0866691
ENSMUSG00000056749.8	MGI:109495	Nfil3	nuclear factor, interleukin 3, regulated	1.64882	2.66457e-06	2.29829e-05	0.341173	0.334332	0.538518
ENSMUSG00000056888.12	MGI:1920940	Glipr1	GLI pathogenesis-related 1 (glioma)	3.126	6.62592e-07	6.92354e-06	1.06946	0.0957117	0.232237
ENSMUSG00000056900.14	MGI:1919857	Usp13	ubiquitin specific peptidase 13 (isopeptidase T-3)	0.594839	0.000429157	0.00190845	-0.230481	0.174295	0.351943
ENSMUSG00000056904.4	MGI:3647798	Gm5620	predicted gene 5620	0.642264	1.57021e-06	1.45506e-05	0.235074	0.0791387	0.203115
ENSMUSG00000057135.13	MGI:3610314	Scimp	SLP adaptor and CSK interacting membrane protein	4.82014	0.000123151	0.000637735	1.94368	0.0716323	0.189793
ENSMUSG00000057137.10	MGI:1915737	Tmem140	transmembrane protein 140	1.12477	0.00284635	0.0098098	1.02789	0.00815777	0.0385382
ENSMUSG00000057228.7	MGI:1345167	Aadat	aminoadipate aminotransferase	2.02354	0.000472836	0.00207576	0.523717	0.405991	0.607748
ENSMUSG00000057244.7	MGI:3643279	Gm6139	predicted gene 6139	0.698618	2.32747e-06	2.04483e-05	0.210335	0.172244	0.349149
ENSMUSG00000057329.8	MGI:88138	Bcl2	B cell leukemia/lymphoma 2	1.10589	2.40148e-06	2.10044e-05	0.2986	0.205392	0.391954
ENSMUSG00000057337.14	MGI:1858224	Chst3	carbohydrate sulfotransferase 3	1.60496	1.29644e-06	1.23432e-05	1.02355	0.00242996	0.0152889
ENSMUSG00000057346.13	MGI:3606001	Apol9a	apolipoprotein L 9a	4.17216	0.000104549	0.000553424	1.79291	0.0705187	0.187558
ENSMUSG00000057421.13	MGI:1923380	Las1l	LAS1-like (S. cerevisiae)	0.699933	1.44112e-08	2.57766e-07	-0.0754527	0.542836	0.720813
ENSMUSG00000057530.15	MGI:1101357	Ece1	endothelin converting enzyme 1	0.734198	2.45203e-07	2.9431e-06	-0.0200518	0.88866	0.944653
ENSMUSG00000057657.5	MGI:3642474	Rps18-ps3	ribosomal protein S18, pseudogene 3	0.657997	1.47138e-06	1.37607e-05	0.251992	0.0735423	0.193354
ENSMUSG00000057829.6	MGI:3643701	Gm5278	predicted pseudogene 5278	1.74751	0.00155042	0.00578718	1.01423	0.0939418	0.229122
ENSMUSG00000057969.16	MGI:107561	Sema3b	sema domain, immunoglobulin domain (Ig), short basic domain, secreted, (semaphorin) 3B	1.46213	0.000109569	0.000576105	0.999871	0.0120096	0.051782
ENSMUSG00000058046.2	MGI:3045314	4933430I17Rik	RIKEN cDNA 4933430I17 gene	1.32943	0.00183727	0.00672424	0.849009	0.0628432	0.172684
ENSMUSG00000058056.17	MGI:1919583	Palld	palladin, cytoskeletal associated protein	1.92508	7.17279e-10	1.9339e-08	0.984137	0.00177091	0.0119323
ENSMUSG00000058392.14	MGI:1919712	Rrp1b	ribosomal RNA processing 1B	0.585169	2.5409e-05	0.000161951	0.0966605	0.491312	0.681294
ENSMUSG00000058396.8	MGI:109545	Gpr182	G protein-coupled receptor 182	1.42737	6.20711e-05	0.000353256	0.413442	0.253498	0.450765
ENSMUSG00000058542.4	MGI:3831433	Gm15590	predicted gene 15590	1.99058	2.20012e-11	9.79337e-10	0.861891	0.0040463	0.0226278
ENSMUSG00000058571.12	MGI:1346322	Gpc6	glypican 6	0.858285	7.0872e-05	0.000396594	0.126304	0.564018	0.737133
ENSMUSG00000058587.10	MGI:1355315	Tmod3	tropomodulin 3	0.808326	7.40887e-07	7.61151e-06	0.287864	0.079381	0.203497
ENSMUSG00000058625.7	MGI:4937017	Gm17383	predicted gene, 17383	0.652844	3.10063e-08	5.00702e-07	0.241146	0.0409938	0.127182
ENSMUSG00000058755.4	MGI:104749	Osm	oncostatin M	2.4609	7.32861e-05	0.00040827	2.40734	0.00165938	0.0113643
ENSMUSG00000058952.13	MGI:105937	Cfi	complement component factor i	5.96839	1.82591e-05	0.00012155	3.71248	0.0104158
ENSMUSG00000059022.16	MGI:2141640	Kcp	kielin/chordin-like protein	1.03468	2.17642e-05	0.000141785	0.623137	0.0107748	0.0476961
ENSMUSG00000059033.8	MGI:3647504	Rpl18a-ps1	ribosomal protein L18A, pseudogene 1	0.661652	0.00186137	0.00679248	0.508582	0.0200012	0.0758199
ENSMUSG00000059182.9	MGI:1889206	Skap2	src family associated phosphoprotein 2	0.864562	0.000332508	0.00152566	0.539938	0.0256141	0.090557
ENSMUSG00000059326.8	MGI:1339754	Csf2ra	colony stimulating factor 2 receptor, alpha, low-affinity (granulocyte-macrophage)	1.01492	1.84472e-06	1.66993e-05	0.646261	0.00265405	0.0163815
ENSMUSG00000059479.8	MGI:2385269	B3gnt8	UDP-GlcNAc:betaGal beta-1,3-N-acetylglucosaminyltransferase 8	2.88356	1.07738e-06	1.05393e-05	1.58483	0.00819689	0.0386547
ENSMUSG00000059552.14	MGI:98834	Trp53	transformation related protein 53	0.634163	4.21338e-09	8.80571e-08	0.309637	0.00470733	0.0254396
ENSMUSG00000059631.7	MGI:1917508	1500035N22Rik	RIKEN cDNA 1500035N22 gene	3.56671	0.000537414	0.00232098	-0.0115683	0.989299	0.995427
ENSMUSG00000059810.19	MGI:1354734	Rgs3	regulator of G-protein signaling 3	0.96511	5.67135e-05	0.000325877	0.247073	0.305107	0.508392
ENSMUSG00000059895.14	MGI:1277098	Ptp4a3	protein tyrosine phosphatase 4a3	0.803631	7.94857e-13	6.07103e-11	0.334804	0.00306525	0.0182721
ENSMUSG00000059900.15	MGI:2137870	Tmem40	transmembrane protein 40	2.70109	4.11352e-05	0.000245629	1.3917	0.0356559	0.115247
ENSMUSG00000059994.11	MGI:2442862	Fcrl1	Fc receptor-like 1	2.12722	0.000325027	0.00149384	1.12452	0.0691038	0.185044
ENSMUSG00000060044.9	MGI:2143537	Tmem26	transmembrane protein 26	3.0689	0.0020326	0.00733632	0.364611	0.75539	0.865974
ENSMUSG00000060090.17	MGI:1277953	Rp2	retinitis pigmentosa 2 homolog	0.598211	0.000340878	0.00155859	0.531645	0.00163093	0.0112058
ENSMUSG00000060093.7	MGI:2448419	H4c1	H4 clustered histone 1	3.27539	0.000603169	0.00256507	1.66084	0.0320747	0.106715
ENSMUSG00000060131.12	MGI:1859664	Atp8b4	ATPase, class I, type 8B, member 4	4.29107	0.000395736	0.00177683	1.21416	0.378514	0.581349
ENSMUSG00000060143.8	MGI:3704451	Gm10076	predicted gene 10076	0.821629	7.80701e-08	1.10687e-06	0.357927	0.0204374	0.0770645
ENSMUSG00000060284.8	MGI:2153568	Sp7	Sp7 transcription factor 7	1.24126	0.00271985	0.00942955	-0.790703	0.0758344	0.197138
ENSMUSG00000060467.5	MGI:3710529	Gm10080	predicted gene 10080	0.631125	3.15985e-07	3.64659e-06	0.113464	0.36517	0.568298
ENSMUSG00000060470.8	MGI:1859670	Adgrg3	adhesion G protein-coupled receptor G3	3.82411	1.41089e-06	1.32853e-05	1.07151	0.203894	0.390055
ENSMUSG00000060538.15	MGI:1915992	Tmem219	transmembrane protein 219	0.630611	0.000115949	0.000605011	0.459557	0.00591447	0.0303306
ENSMUSG00000060586.12	MGI:95901	H2-Eb1	histocompatibility 2, class II antigen E beta	3.98259	7.78403e-10	2.0662e-08	1.08808	0.109254	0.25469
ENSMUSG00000060594.7	MGI:2685357	Layn	layilin	1.75197	2.30518e-11	1.01948e-09	0.431017	0.102218	0.24284
ENSMUSG00000060703.13	MGI:1913455	Cd302	CD302 antigen	0.639497	0.0013875	0.0052527	0.353726	0.0798716	0.204319
ENSMUSG00000060890.12	MGI:2159617	Arr3	arrestin 3, retinal	4.11617	1.28674e-09	3.19584e-08	1.46624	0.0323305	0.107326
ENSMUSG00000061533.17	MGI:1922466	Cep128	centrosomal protein 128	0.643799	0.00179222	0.00657955	0.37251	0.0769351	0.198903
ENSMUSG00000061607.16	MGI:3525201	Mdc1	mediator of DNA damage checkpoint 1	0.620799	2.74475e-05	0.000173333	0.371218	0.0127579	0.0541609
ENSMUSG00000061815.12	MGI:3588214	Rufy4	RUN and FYVE domain containing 4	3.1307	0.000605228	0.00257172	3.74421	0.00221293	0.0141692
ENSMUSG00000061833.7	MGI:3644735	Gm6311	predicted gene 6311	0.679148	4.0948e-06	3.32286e-05	0.109391	0.475019	0.667319
ENSMUSG00000061950.18	MGI:1917601	Ppp4r1	protein phosphatase 4, regulatory subunit 1	0.720325	9.42118e-08	1.29944e-06	0.384533	0.00470367	0.0254286
ENSMUSG00000061983.8	MGI:98105	Rps12	ribosomal protein S12	0.620551	2.76609e-05	0.000174359	0.344336	0.0202561	0.0765565
ENSMUSG00000062082.17	MGI:3036289	Cd200r4	CD200 receptor 4	4.09662	1.03872e-05	7.41327e-05	2.55376	0.0688852	0.184681
ENSMUSG00000062093.6	MGI:3641718	Gm10110	predicted gene 10110	0.802254	4.76822e-10	1.35487e-08	0.147879	0.26297	0.461802
ENSMUSG00000062168.13	MGI:1097157	Ppef1	protein phosphatase with EF hand calcium-binding domain 1	2.2412	0.00216765	0.00776243	-0.487889	0.482572	0.673848
ENSMUSG00000062365.5	MGI:3647516	Gm4968	predicted gene 4968	0.835668	0.00129932	0.00496756	0.107354	0.69516	0.828768
ENSMUSG00000062382.10	MGI:3779109	Ftl1-ps1	ferritin light polypeptide 1, pseudogene 1	2.02198	2.16958e-11	9.7047e-10	0.921044	0.00239158	0.0151146
ENSMUSG00000062464.7	MGI:3780112	Cyp4f37	cytochrome P450, family 4, subfamily f, polypeptide 37	1.04329	0.000250737	0.00118948	0.343381	0.248382	0.445365
ENSMUSG00000062510.13	MGI:2685830	Nsl1	NSL1, MIS12 kinetochore complex component	1.57117	2.07664e-06	1.85416e-05	0.823441	0.0167616	0.0664958
ENSMUSG00000062593.18	MGI:6121530	Gm49339	predicted gene, 49339	5.18987	2.64709e-11	1.14847e-09	2.17123	0.00951976	0.0433845
ENSMUSG00000062619.7	MGI:1914351	2310039H08Rik	RIKEN cDNA 2310039H08 gene	1.27435	2.63496e-07	3.13045e-06	0.581384	0.0235603	0.0853291
ENSMUSG00000062937.8	MGI:1914152	Mtap	methylthioadenosine phosphorylase	0.765303	4.29185e-05	0.000255228	0.164143	0.3856	0.58783
ENSMUSG00000062944.5	MGI:2442738	9130023H24Rik	RIKEN cDNA 9130023H24 gene	1.02409	1.27005e-06	1.21522e-05	0.537373	0.0136863	0.0571634
ENSMUSG00000062960.11	MGI:96683	Kdr	kinase insert domain protein receptor	0.69847	0.000336657	0.00154264	0.144075	0.46097	0.65606
ENSMUSG00000062991.10	MGI:96083	Nrg1	neuregulin 1	1.21861	0.00121563	0.00469406	-0.118792	0.754077	0.865211
ENSMUSG00000063011.8	MGI:1888992	Msln	mesothelin	2.08937	5.32065e-05	0.000308375	1.24408	0.0168153	0.066668
ENSMUSG00000063060.7	MGI:98369	Sox7	SRY (sex determining region Y)-box 7	0.973043	0.000109494	0.000575818	0.339747	0.19165	0.373679
ENSMUSG00000063193.10	MGI:2685099	Cd300lb	CD300 molecule like family member B	6.38622	1.88238e-10	6.02274e-09	2.09252	0.01901	0.0732521
ENSMUSG00000063229.16	MGI:96759	Ldha	lactate dehydrogenase A	0.6339	0.000234662	0.00112196	0.0618773	0.719642	0.844482
ENSMUSG00000063434.7	MGI:1913923	Sorcs3	sortilin-related VPS10 domain containing receptor 3	1.81212	7.02169e-07	7.26272e-06	0.155117	0.671273	0.813093
ENSMUSG00000063458.14	MGI:1923883	Lrmda	leucine rich melanocyte differentiation associated	1.69467	1.84557e-05	0.000122502	1.29366	0.0019761	0.0130051
ENSMUSG00000063558.5	MGI:88035	Aox1	aldehyde oxidase 1	1.12624	3.52536e-08	5.56827e-07	0.427197	0.039363	0.123703
ENSMUSG00000063767.5	MGI:2687194	S100a7a	S100 calcium binding protein A7A	1.99744	8.27363e-05	0.000453001	1.51801	0.00309614	0.0184182
ENSMUSG00000063931.15	MGI:97542	Pepd	peptidase D	0.647951	0.000132975	0.000682294	0.214944	0.207778	0.39474
ENSMUSG00000064057.13	MGI:1915912	Scgb3a1	secretoglobin, family 3A, member 1	3.45746	0.000106438	0.000561798	2.51389	0.00623124	0.0315579
ENSMUSG00000064090.15	MGI:1917172	Vrk2	vaccinia related kinase 2	1.16766	0.000568025	0.00243439	0.785882	0.0232554	0.0845309
ENSMUSG00000064128.9	MGI:2684927	Cenpj	centromere protein J	1.08096	4.45572e-07	4.88117e-06	0.165253	0.450097	0.646828
ENSMUSG00000064247.15	MGI:2685422	Plcxd1	phosphatidylinositol-specific phospholipase C, X domain containing 1	0.886058	7.39228e-05	0.000410816	0.623289	0.00633506	0.0319759
ENSMUSG00000064262.8	MGI:2685303	Gimap8	GTPase, IMAP family member 8	1.52892	4.78202e-06	3.80618e-05	0.700402	0.0442031	0.134228
ENSMUSG00000064307.14	MGI:1916608	Lrrc51	leucine rich repeat containing 51	0.94847	4.15069e-06	3.35827e-05	0.472489	0.0241111	0.0867875
ENSMUSG00000066000.13	MGI:2148252	Zfp979	zinc finger protein 979	1.1135	0.00140725	0.00531424	0.362741	0.321988	0.525985
ENSMUSG00000066026.15	MGI:1315215	Dhrs3	dehydrogenase/reductase (SDR family) member 3	1.41656	1.38857e-05	9.54011e-05	0.248524	0.447658	0.644903
ENSMUSG00000066043.14	MGI:2140327	Phactr4	phosphatase and actin regulator 4	0.847094	1.41193e-06	1.32904e-05	0.407367	0.0218824	0.0809594
ENSMUSG00000066068.6	MGI:3651300	Gm13611	predicted gene 13611	0.634111	0.00020985	0.00101972	0.485945	0.00687715	0.0339564
ENSMUSG00000066113.17	MGI:1924989	Adamtsl1	ADAMTS-like 1	0.978845	0.00174739	0.00643825	-0.317084	0.312632	0.516278
ENSMUSG00000066150.13	MGI:1333843	Slc31a1	solute carrier family 31, member 1	0.783184	1.35459e-06	1.28079e-05	0.316807	0.0518372	0.150473
ENSMUSG00000066361.4	MGI:102848	Serpina3c	serine (or cysteine) peptidase inhibitor, clade A, member 3C	2.03888	5.37379e-05	0.000311192	0.909026	0.0646908	0.17617
ENSMUSG00000066407.4	MGI:3642825	Gm10263	predicted gene 10263	0.595147	0.00193834	0.00703788	0.480107	0.0165846	0.0659829
ENSMUSG00000066442.18	MGI:1340032	Mthfs	5, 10-methenyltetrahydrofolate synthetase	0.867453	9.98761e-05	0.000532698	0.387267	0.0877524	0.218572
ENSMUSG00000066487.4	MGI:3645003	Gm5786	predicted pseudogene 5786	0.644236	6.06177e-06	4.67155e-05	0.243273	0.0949005	0.230851
ENSMUSG00000066629.3	MGI:3642480	Rpl36-ps3	ribosomal protein L36, pseudogene 3	0.686561	0.00151955	0.00568354	0.529234	0.0248199	0.0885804
ENSMUSG00000066677.13	MGI:2442822	Ifi208	interferon activated gene 208	2.40026	0.0013695	0.00519245	1.80832	0.0221789	0.081667
ENSMUSG00000066878.6	MGI:3704480	Gm10184	predicted pseudogene 10184	1.38063	9.45218e-09	1.77277e-07	0.524867	0.0330054	0.108802
ENSMUSG00000066894.15	MGI:2448533	Vsig10	V-set and immunoglobulin domain containing 10	0.908418	0.000162629	0.000814778	0.401325	0.106021	0.249203
ENSMUSG00000067017.6	MGI:106236	Capza1-ps1	capping protein (actin filament) muscle Z-line, alpha 1, pseudogene 1	0.973301	3.02098e-06	2.55823e-05	0.477888	0.0229875	0.0838253
ENSMUSG00000067038.7	MGI:3704503	Rps12-ps3	ribosomal protein S12, pseudogene 3	0.654967	0.00043931	0.00194665	0.441685	0.0193763	0.0742704
ENSMUSG00000067608.6	MGI:97505	Pcna-ps2	proliferating cell nuclear antigen pseudogene 2	1.04432	2.1761e-10	6.86636e-09	0.15148	0.373351	0.576587
ENSMUSG00000067818.7	MGI:2138915	Myl9	myosin, light polypeptide 9, regulatory	0.935536	7.53244e-05	0.000417192	0.310964	0.191238	0.373148
ENSMUSG00000068105.12	MGI:1919299	Tnfrsf13c	tumor necrosis factor receptor superfamily, member 13c	1.91127	0.000603738	0.00256699	1.85465	0.00599088	0.0306084
ENSMUSG00000068196.6	MGI:88463	Col8a1	collagen, type VIII, alpha 1	2.18833	0.000978602	0.00388381	0.179524	0.793854	0.890521
ENSMUSG00000068335.7	MGI:893587	Dok1	docking protein 1	2.08072	1.05954e-05	7.54022e-05	1.3537	0.00483293	0.0259234
ENSMUSG00000068604.5	MGI:3643826	Gm8225	predicted gene 8225	0.741557	3.44759e-06	2.8629e-05	0.138423	0.409654	0.611416
ENSMUSG00000069083.5	MGI:3704211	Gm10259	predicted pseudogene 10259	1.4157	4.5857e-10	1.30979e-08	0.591451	0.0111281	0.0489027
ENSMUSG00000069117.5	MGI:3642298	Rps18-ps6	ribosomal protein S18, pseudogene 6	0.730912	9.75664e-08	1.33563e-06	0.203831	0.143752	0.308332
ENSMUSG00000069607.5	MGI:2687214	Cd300ld3	CD300 molecule like family member D3	2.71022	7.66737e-06	5.73171e-05	0.733258	0.277603	0.478275
ENSMUSG00000069609.8	MGI:3702658	Cd300ld4	CD300 molecule like family member D4	2.36997	8.36815e-05	0.000457536	0.0512971	0.936894	0.969872
ENSMUSG00000069633.13	MGI:1920905	Pex11g	peroxisomal biogenesis factor 11 gamma	1.06809	0.00285105	0.00982231	0.884975	0.0230388	0.0839713
ENSMUSG00000069763.4	MGI:1915138	Tmem100	transmembrane protein 100	1.50438	2.56432e-07	3.05712e-06	0.843303	0.00403769	0.0225902
ENSMUSG00000069792.6	MGI:3649773	Wfdc17	WAP four-disulfide core domain 17	4.63298	1.68708e-06	1.54714e-05	2.7354	0.00824757	0.0388403
ENSMUSG00000069833.14	MGI:1316648	Ahnak	AHNAK nucleoprotein (desmoyokin)	1.33755	5.44181e-08	8.07874e-07	0.719822	0.00350662	0.020144
ENSMUSG00000069862.7	MGI:3704324	Rps12-ps9	ribosomal protein S12, pseudogene 9	0.803887	1.33696e-06	1.26674e-05	0.221001	0.192793	0.375147
ENSMUSG00000070034.14	MGI:1923364	Sp110	Sp110 nuclear body protein	2.42942	3.88032e-08	6.04536e-07	1.33324	0.00312613	0.018559
ENSMUSG00000070047.15	MGI:109168	Fat1	FAT atypical cadherin 1	0.638792	0.00236426	0.00837353	0.0926368	0.659841	0.805215
ENSMUSG00000070348.6	MGI:88313	Ccnd1	cyclin D1	2.24293	5.89506e-11	2.29932e-09	0.838363	0.0144853	0.0594725
ENSMUSG00000070354.14	MGI:5439444	Evi2	ecotropic viral integration site 2	1.97199	2.62028e-08	4.3152e-07	1.11293	0.00202752	0.0132461
ENSMUSG00000070369.14	MGI:3578624	Itgad	integrin, alpha D	1.62436	0.00137527	0.00520999	0.259012	0.615915	0.774347
ENSMUSG00000070372.12	MGI:106227	Capza1	capping protein (actin filament) muscle Z-line, alpha 1	0.950311	4.43113e-08	6.784e-07	0.374299	0.0318204	0.106279
ENSMUSG00000070394.11	MGI:1916436	Tmem256	transmembrane protein 256	0.6256	4.42344e-05	0.000262307	0.126618	0.410598	0.612357
ENSMUSG00000070407.6	MGI:1333853	Hs3st3b1	heparan sulfate (glucosamine) 3-O-sulfotransferase 3B1	1.59936	0.000467156	0.00205477	1.35856	0.00410091	0.0228808
ENSMUSG00000070526.3	MGI:1351637	Peg12	paternally expressed 12	2.74556	1.20214e-05	8.40243e-05	1.35851	0.0433036	0.132417
ENSMUSG00000070691.11	MGI:102672	Runx3	runt related transcription factor 3	5.56836	3.61272e-05	0.00021955	2.24554	0.169472	0.344875
ENSMUSG00000070692.7	MGI:3649508	Rps12-ps10	ribosomal protein S12, pseudogene 10	0.660708	0.000536922	0.00231922	0.405358	0.0420292	0.12943
ENSMUSG00000070699.6	MGI:1919234	Sars2	seryl-aminoacyl-tRNA synthetase 2	0.667358	2.10287e-07	2.58221e-06	0.16828	0.197821	0.38184
ENSMUSG00000070713.6	MGI:3704312	Gm10282	predicted pseudogene 10282	0.667207	9.92055e-06	7.1453e-05	0.333076	0.0309851	0.104155
ENSMUSG00000070732.3	MGI:2685663	Rbm44	RNA binding motif protein 44	4.28369	1.65273e-05	0.000111319	2.14456	0.0571459	0.161458
ENSMUSG00000070866.5	MGI:2442949	Zfp804a	zinc finger protein 804A	1.19859	0.000480747	0.00210711	0.0372955	0.913588	0.957811
ENSMUSG00000070871.11	MGI:2138614	Ccnyl1	cyclin Y-like 1	0.614981	1.79095e-07	2.24441e-06	0.138433	0.251718	0.448928
ENSMUSG00000070873.6	MGI:3647196	Lilra5	leukocyte immunoglobulin-like receptor, subfamily A (with TM domain), member 5	1.71284	0.0016222	0.00602436	1.23122	0.0382692	0.121264
ENSMUSG00000070960.5	MGI:5011865	Gm19680	predicted gene, 19680	0.954732	0.00140452	0.00530541	0.539572	0.088155	0.219347
ENSMUSG00000071001.5	MGI:1917945	Hrct1	histidine rich carboxyl terminus 1	1.62394	7.35338e-06	5.52713e-05	0.452797	0.216992	0.406286
ENSMUSG00000071005.8	MGI:1346316	Ccl19	chemokine (C-C motif) ligand 19	2.86524	0.000221347	0.0010676	0.513	0.475857	0.66804
ENSMUSG00000071076.9	MGI:96648	Jund	jun D proto-oncogene	0.725041	7.07007e-05	0.000395878	0.458569	0.012258	0.0526352
ENSMUSG00000071151.4	MGI:3648850	Gm4799	predicted gene 4799	0.781742	0.00024226	0.00115386	0.404049	0.0631035	0.173085
ENSMUSG00000071317.5	MGI:1346013	Bves	blood vessel epicardial substance	0.763913	0.00187528	0.0068396	0.0455435	0.853208	0.923671
ENSMUSG00000071414.6	MGI:3643048	Gm6736	predicted gene 6736	0.717577	0.000116375	0.000606999	0.263784	0.162312	0.334904
ENSMUSG00000071547.5	MGI:1917271	Nt5dc2	5'-nucleotidase domain containing 2	0.839423	8.19799e-06	6.07538e-05	0.255227	0.184336	0.364713
ENSMUSG00000071653.10	MGI:1913526	1810009A15Rik	RIKEN cDNA 1810009A15 gene	0.682817	4.06507e-08	6.30098e-07	0.338248	0.00838113	0.039346
ENSMUSG00000071714.8	MGI:1339760	Csf2rb2	colony stimulating factor 2 receptor, beta 2, low-affinity (granulocyte-macrophage)	1.92474	2.626e-06	2.27073e-05	1.22048	0.00313324	0.0185789
ENSMUSG00000071724.6	MGI:3709877	Smpd5	sphingomyelin phosphodiesterase 5	1.5132	0.000123425	0.00063855	1.13286	0.00681307	0.0336815
ENSMUSG00000072244.12	MGI:2137352	Trim6	tripartite motif-containing 6	2.04922	0.000322616	0.0014845	-0.0292742	0.960581	0.981484
ENSMUSG00000072571.4	MGI:3588246	Tmem253	transmembrane protein 253	2.42738	1.07755e-08	1.99369e-07	1.40143	0.00387152	0.0217974
ENSMUSG00000072720.10	MGI:1921626	Myo18b	myosin XVIIIb	0.943954	0.00101016	0.00399458	0.567745	0.0528283	0.152466
ENSMUSG00000072789.5	MGI:3704275	Gm10420	predicted gene 10420	0.817902	1.65345e-07	2.09993e-06	0.0534349	0.742798	0.85792
ENSMUSG00000072941.6	MGI:103181	Sod3	superoxide dismutase 3, extracellular	0.947063	3.59926e-05	0.000218877	0.253351	0.274011	0.473989
ENSMUSG00000072980.4	MGI:1917895	Oip5	Opa interacting protein 5	1.53979	2.98575e-08	4.83861e-07	0.273417	0.354585	0.55789
ENSMUSG00000073002.10	MGI:1858622	Vamp5	vesicle-associated membrane protein 5	1.5783	1.5014e-07	1.92917e-06	0.916104	0.00308962	0.0183946
ENSMUSG00000073152.5	MGI:3642283	Gm10475	predicted gene 10475	5.4323	0.000758222	0.00311234	-1.7918	0.310087
ENSMUSG00000073155.13	MGI:1914955	1810058I24Rik	RIKEN cDNA 1810058I24 gene	0.674767	3.79514e-05	0.000229364	0.445553	0.00710049	0.0347098
ENSMUSG00000073402.12	MGI:3704134	Gm8909	predicted gene 8909	2.11108	3.70496e-05	0.00022431	1.13968	0.033091	0.108963
ENSMUSG00000073406.11	MGI:892004	H2-Bl	histocompatibility 2, blastocyst	1.87885	0.000725361	0.0029972	1.32996	0.0299323	0.101377
ENSMUSG00000073492.3	MGI:3642358	Gm10521	predicted gene 10521	2.1097	0.000536046	0.00231653	1.79286	0.00766994	0.036739
ENSMUSG00000073530.12	MGI:3051647	Pappa2	pappalysin 2	1.51578	0.00094668	0.00377296	0.322467	0.492024	0.681819
ENSMUSG00000073555.2	MGI:3644953	Gm4951	predicted gene 4951	2.86463	7.12881e-06	5.37602e-05	1.83552	0.00552252	0.0287748
ENSMUSG00000073650.9	MGI:2685062	Catip	ciliogenesis associated TTC17 interacting protein	1.4098	8.52534e-06	6.28063e-05	0.751223	0.0194293	0.0743789
ENSMUSG00000073705.11	MGI:1917178	Cenps	centromere protein S	0.941727	2.4948e-05	0.000159495	0.407771	0.0792445	0.203256
ENSMUSG00000073716.7	MGI:3649920	Gm13241	predicted gene 13241	1.41151	0.000129583	0.00066651	0.392352	0.278574	0.479249
ENSMUSG00000073787.5	MGI:3708765	Gm10575	predicted gene 10575	1.53509	0.000131572	0.000675855	0.361819	0.376686	0.579825
ENSMUSG00000073802.6	MGI:104737	Cdkn2b	cyclin dependent kinase inhibitor 2B	2.02354	5.10311e-07	5.4895e-06	0.587047	0.150089	0.317901
ENSMUSG00000073980.6	MGI:3809525	Gm9574	predicted gene 9574	1.93261	0.00060464	0.00256963	0.846373	0.153496	0.322811
ENSMUSG00000073987.5	MGI:1329035	Ggh	gamma-glutamyl hydrolase	0.811409	5.59977e-05	0.000322508	0.554052	0.00633007	0.0319641
ENSMUSG00000074001.4	MGI:1919580	Klhl40	kelch-like 40	1.71673	4.03671e-07	4.47762e-06	0.879588	0.0104141	0.0465018
ENSMUSG00000074034.2	MGI:3648968	Gm5921	predicted gene 5921	0.800275	7.55895e-08	1.07783e-06	0.03344	0.82643	0.90905
ENSMUSG00000074250.12	MGI:3642572	Gm10653	predicted gene 10653	0.78405	0.00113922	0.00443902	0.444413	0.0823839	0.208857
ENSMUSG00000074361.12	MGI:2442013	C5ar2	complement component 5a receptor 2	1.53172	0.000338937	0.00155079	1.32651	0.00288094	0.0174504
ENSMUSG00000074513.10	MGI:1277120	Arfip1	ADP-ribosylation factor interacting protein 1	0.762179	6.28565e-08	9.16281e-07	0.288106	0.0428991	0.13138
ENSMUSG00000074577.10	MGI:1916803	Ripor3	RIPOR family member 3	2.77558	0.000116784	0.000608902	0.588313	0.466701	0.660054
ENSMUSG00000074677.12	MGI:3807521	Sirpb1c	signal-regulatory protein beta 1C	4.35696	1.46017e-05	9.96277e-05	1.60879	0.186291	0.366991
ENSMUSG00000074743.5	MGI:98736	Thbd	thrombomodulin	1.18454	0.000298924	0.00138994	0.092509	0.780336	0.882273
ENSMUSG00000074802.12	MGI:1918780	Gas2l3	growth arrest-specific 2 like 3	1.57556	4.73099e-06	3.77433e-05	0.731838	0.0392836	0.123532
ENSMUSG00000074825.5	MGI:1920588	Itpripl1	inositol 1,4,5-triphosphate receptor interacting protein-like 1	1.13663	9.06001e-05	0.000489701	0.89697	0.00314319	0.018603
ENSMUSG00000074846.4	MGI:3642325	Gm10774	predicted pseudogene 10774	1.06545	4.74204e-06	3.78085e-05	0.497108	0.0471601	0.140232
ENSMUSG00000074916.6	MGI:1919386	Chst14	carbohydrate sulfotransferase 14	1.43702	3.0158e-06	2.55462e-05	0.687514	0.0286196	0.098292
ENSMUSG00000075010.6	MGI:2147706	AW112010	expressed sequence AW112010	1.25467	0.00225856	0.00805432	0.715561	0.0993413	0.238065
ENSMUSG00000075020.7	MGI:3041234	Mir670hg	MIR670 host gene (non-protein coding)	1.41855	0.00287589	0.00989793	-0.610952	0.208535	0.395775
ENSMUSG00000075254.13	MGI:1924696	Heg1	heart development protein with EGF-like domains 1	0.620928	0.000436532	0.001937	0.0174966	0.921427	0.96196
ENSMUSG00000075284.11	MGI:2178801	Wipf1	WAS/WASL interacting protein family, member 1	1.50365	9.84831e-08	1.34482e-06	0.89351	0.00166156	0.0113643
ENSMUSG00000075296.6	MGI:2147613	Aldh3b2	aldehyde dehydrogenase 3 family, member B2	2.49681	2.1886e-07	2.67308e-06	0.938076	0.053514	0.153836
ENSMUSG00000075302.11	MGI:1913998	Erich2	glutamate rich 2	1.71847	0.000422756	0.00188273	0.826697	0.123907	0.277593
ENSMUSG00000075307.4	MGI:2683854	Klhl41	kelch-like 41	2.13499	0.000796703	0.00324793	0.834707	0.186953	0.367651
ENSMUSG00000075312.5	MGI:3651139	Gm13597	predicted gene 13597	1.75165	2.86349e-06	2.44296e-05	1.1535	0.00313701	0.0185893
ENSMUSG00000075602.11	MGI:107527	Ly6a	lymphocyte antigen 6 complex, locus A	1.02604	9.17271e-05	0.000495012	0.319123	0.225084	0.415962
ENSMUSG00000075705.14	MGI:1351642	Msrb1	methionine sulfoxide reductase B1	0.877524	1.9642e-06	1.76643e-05	0.252467	0.176207	0.354251
ENSMUSG00000076218.3	MGI:3629930	Mir692-1	microRNA 692-1	3.13371	1.72012e-05	0.000115444	1.00773	0.156313	0.326976
ENSMUSG00000076433.5	MGI:1929713	Cep295nl	CEP295 N-terminal like	2.05009	0.00280071	0.00966831	0.784352	0.279453	0.48043
ENSMUSG00000077192.5	MGI:4360060	Snora17	small nucleolar RNA, H/ACA box 17	3.0041	1.70215e-06	1.55888e-05	0.553701	0.423662	0.623967
ENSMUSG00000078122.5	MGI:3641813	F630028O10Rik	RIKEN cDNA F630028O10 gene	5.30889	0.000138277	0.000706851	0.555672	0.657879	0.803865
ENSMUSG00000078154.4	MGI:3652174	Gm12184	predicted gene 12184	0.747391	1.88133e-07	2.34482e-06	0.307835	0.0342551	0.111801
ENSMUSG00000078190.8	MGI:3052332	Dnm3os	dynamin 3, opposite strand	4.35474	0.00125453	0.00482458	0.93323	0.474361
ENSMUSG00000078350.12	MGI:1916109	Smim1	small integral membrane protein 1	0.689627	0.000174145	0.00086693	0.499422	0.00788529	0.0375164
ENSMUSG00000078452.11	MGI:1861032	Raet1d	retinoic acid early transcript delta	4.69164	2.51417e-06	2.18881e-05	3.64794	0.0066768	0.0332058
ENSMUSG00000078495.11	MGI:3651978	Zfp984	zinc finger protein 984	0.714087	0.0014141	0.00533866	0.315897	0.169007	0.34433
ENSMUSG00000078502.11	MGI:3651014	Zfp268	zinc finger protein 268	0.972939	0.000994633	0.00394116	0.465181	0.127756	0.283471
ENSMUSG00000078521.3	MGI:1917135	Aunip	aurora kinase A and ninein interacting protein	2.21421	0.000445456	0.0019707	0.754473	0.256605	0.454843
ENSMUSG00000078606.9	MGI:3782245	Gvin2	GTPase, very large interferon inducible, family member 2	1.84403	2.28449e-08	3.81955e-07	0.661795	0.0464702	0.138833
ENSMUSG00000078762.11	MGI:1919159	Haus5	HAUS augmin-like complex, subunit 5	0.791861	3.99152e-06	3.24808e-05	0.319376	0.071262	0.188957
ENSMUSG00000078763.3	MGI:1313259	Slfn1	schlafen 1	6.11975	6.72383e-06	5.10007e-05	1.0332	0.408361	0.610252
ENSMUSG00000078773.12	MGI:3605986	Rad54b	RAD54 homolog B (S. cerevisiae)	1.1685	5.57753e-07	5.93695e-06	0.508737	0.0376027	0.119752
ENSMUSG00000078815.9	MGI:1859168	Cacng6	calcium channel, voltage-dependent, gamma subunit 6	1.96922	7.06421e-08	1.01361e-06	0.450933	0.236459	0.43079
ENSMUSG00000078915.3	MGI:96241	Hsp25-ps1	heat shock protein 25, pseudogene 1	3.0048	1.02764e-09	2.64332e-08	1.45307	0.00445276	0.0243791
ENSMUSG00000078920.4	MGI:99448	Ifi47	interferon gamma inducible protein 47	2.04723	1.67492e-07	2.1213e-06	0.460399	0.254228	0.451712
ENSMUSG00000078921.4	MGI:3710083	Tgtp2	T cell specific GTPase 2	1.33341	0.00139226	0.00526687	0.712063	0.0912416	0.224587
ENSMUSG00000078922.10	MGI:98734	Tgtp1	T cell specific GTPase 1	1.3151	0.00117524	0.0045639	0.493212	0.231826	0.425412
ENSMUSG00000078956.4	MGI:3650696	Gm14221	predicted gene 14221	3.86849	0.000467603	0.00205587	-1.45307	0.31401	0.517608
ENSMUSG00000079067.6	MGI:3783162	Hmgn2-ps1	high mobility group nucleosomal binding domain 2, pseudogene 1	0.718267	0.00128841	0.00493356	0.0184945	0.935793	0.969312
ENSMUSG00000079111.4	MGI:1914163	Kdelr2	KDEL (Lys-Asp-Glu-Leu) endoplasmic reticulum protein retention receptor 2	0.846128	3.03742e-08	4.91653e-07	0.289472	0.0597909	0.166659
ENSMUSG00000079197.11	MGI:1096365	Psme2	proteasome (prosome, macropain) activator subunit 2 (PA28 beta)	0.847892	2.69145e-07	3.18101e-06	0.501313	0.00248361	0.0155491
ENSMUSG00000079243.6	MGI:1333878	Xirp1	xin actin-binding repeat containing 1	3.85537	1.49041e-07	1.91774e-06	0.144412	0.859048	0.927446
ENSMUSG00000079298.10	MGI:107539	Klrb1b	killer cell lectin-like receptor subfamily B member 1B	5.37816	3.07359e-05	0.000191193	0.255164	0.849621	0.921444
ENSMUSG00000079455.10	MGI:3783243	Gm16026	predicted pseudogene 16026	2.50092	0.000241112	0.00114879	0.862087	0.271999	0.471696
ENSMUSG00000079457.12	MGI:3644536	Gm7609	predicted pseudogene 7609	3.8232	0.000615932	0.00261074	1.71793	0.0446209	0.135044
ENSMUSG00000079491.10	MGI:95942	H2-T10	histocompatibility 2, T region locus 10	0.840766	0.000320491	0.0014757	0.662403	0.0052215	0.0275551
ENSMUSG00000079492.3	MGI:3779381	Gm11127	predicted gene 11127	1.65353	0.000212987	0.00103292	0.979423	0.0326359	0.107923
ENSMUSG00000079523.9	MGI:109146	Tmsb10	thymosin, beta 10	0.706076	0.00180618	0.00662459	0.691305	0.00227027	0.0144812
ENSMUSG00000079555.3	MGI:2387633	Haus3	HAUS augmin-like complex, subunit 3	0.650608	2.17444e-05	0.000141724	0.46444	0.00314848	0.0186206
ENSMUSG00000079559.6	MGI:2685530	Colca2	COLCA2 homolog	0.974222	0.000572823	0.00245112	0.555159	0.0642929	0.175305
ENSMUSG00000079575.4	MGI:96525	Rbpj-ps3	recombination signal binding protein for immunoglobulin kappa J region, pseudogene 3	1.64466	1.83333e-12	1.22015e-10	0.482642	0.0464067	0.138716
ENSMUSG00000079588.4	MGI:1923725	Tmem182	transmembrane protein 182	2.36177	0.00114921	0.00447479	0.0644416	0.940328	0.97186
ENSMUSG00000079592.10	MGI:2385958	C1qtnf5	C1q and tumor necrosis factor related protein 5	1.37438	3.54219e-06	2.92639e-05	0.850822	0.00475452	0.0255999
ENSMUSG00000079671.9	MGI:1919731	2610203C22Rik	RIKEN cDNA 2610203C22 gene	1.50961	0.000232046	0.00111061	0.533123	0.232865	0.426502
ENSMUSG00000079685.11	MGI:1925027	Ulbp1	UL16 binding protein 1	2.86761	2.01807e-06	1.80953e-05	2.02576	0.00156445	0.0108233
ENSMUSG00000080002.3	MGI:3648428	Gm5566	predicted pseudogene 5566	0.653028	0.000421606	0.00187883	0.237488	0.233771	0.427749
ENSMUSG00000080708.2	MGI:1100505	Ccnd3-ps	cyclin D3, pseudogene	1.72206	0.00195171	0.00707788	0.365604	0.533165	0.713966
ENSMUSG00000080746.4	MGI:3651234	Rpsa-ps12	ribosomal protein SA, pseudogene 12	0.624756	8.52539e-05	0.000464929	0.330173	0.0409158	0.127106
ENSMUSG00000080790.2	MGI:3643470	Gm7638	predicted gene 7638	1.44678	0.00182868	0.00669526	0.101549	0.835317	0.913703
ENSMUSG00000080845.2	MGI:3648181	Gm9115	predicted gene 9115	1.89144	3.68716e-12	2.18363e-10	0.295443	0.291067	0.494061
ENSMUSG00000080875.5	MGI:3643344	Gm7332	predicted gene 7332	1.4698	1.37762e-07	1.79195e-06	0.657942	0.0243307	0.0873296
ENSMUSG00000080917.3	MGI:3801830	Pira2-ps1	paired-Ig-like receptor A2, pseudogene 1	3.58495	0.000243018	0.00115687	1.90843	0.062615	0.172205
ENSMUSG00000080942.2	MGI:3707318	Zfp36l1-ps	zinc finger protein 36, C3H type-like 1, pseudogene	1.50595	0.00173525	0.00639697	0.801567	0.134245	0.293531
ENSMUSG00000080950.2	MGI:3645261	Gm7278	predicted gene 7278	1.45377	7.61679e-08	1.08382e-06	0.376175	0.199265	0.383733
ENSMUSG00000081076.4	MGI:3651545	Rpsa-ps4	ribosomal protein S4, pseudogene 4	0.74213	2.05336e-07	2.52707e-06	0.381021	0.00868605	0.0404849
ENSMUSG00000081169.2	MGI:3651664	Gm12551	predicted gene 12551	3.87718	7.95642e-09	1.53122e-07	2.61225	0.00155437	0.0107659
ENSMUSG00000081170.2	MGI:3651537	Gm12922	predicted gene 12922	0.763264	1.69915e-06	1.55665e-05	0.0589898	0.720242	0.844749
ENSMUSG00000081251.2	MGI:3650637	Gm12164	predicted gene 12164	2.04921	1.05461e-09	2.70762e-08	0.958771	0.00592606	0.0303677
ENSMUSG00000081593.2	MGI:3651164	Gm11841	predicted gene 11841	0.930787	7.07582e-05	0.000396119	0.122141	0.600641	0.763173
ENSMUSG00000081695.2	MGI:3650550	Rpsa-ps5	ribosomal protein SA, pseudogene 5	0.591106	0.000291688	0.00135906	0.143963	0.415253	0.616922
ENSMUSG00000081756.2	MGI:3649312	Gm12291	predicted gene 12291	0.764884	0.000183984	0.000909307	0.147439	0.503332	0.690831
ENSMUSG00000081792.5	MGI:3651262	Anp32b-ps1	Bacidic (leucine-rich) nuclear phosphoprotein 32 family, member B, pseudogene 1	0.655513	0.00279893	0.00966582	0.286164	0.220843	0.410797
ENSMUSG00000081833.2	MGI:3651174	Gm13669	predicted gene 13669	2.34519	0.000509895	0.00221855	2.07276	0.00607688	0.0309653
ENSMUSG00000081886.2	MGI:3644440	Gm6175	predicted gene 6175	3.74877	0.00179908	0.00660122	0.258208	0.785951
ENSMUSG00000081888.2	MGI:3650451	Spcs2-ps	signal peptidase complex subunit 2, pseudogene	0.664427	0.00192457	0.00699703	0.0931634	0.668043	0.810723
ENSMUSG00000081953.2	MGI:3651950	Gm12435	predicted gene 12435	0.729571	6.18161e-06	4.74524e-05	0.208721	0.202974	0.388759
ENSMUSG00000082062.2	MGI:95590	Ftl2-ps	ferritin light polypeptide 2, pseudogene	1.91293	9.01114e-10	2.34649e-08	0.95294	0.00247382	0.0154999
ENSMUSG00000082087.5	MGI:3651749	Gm12138	predicted gene 12138	0.900747	0.000378231	0.00170802	0.215287	0.408229	0.610148
ENSMUSG00000082128.2	MGI:3651313	Gm11824	predicted gene 11824	0.679371	9.96231e-06	7.16972e-05	0.310926	0.0509982	0.14854
ENSMUSG00000082154.2	MGI:3643716	Gm16464	predicted gene 16464	1.03316	0.000129244	0.000664889	0.0352538	0.898798	0.950287
ENSMUSG00000082292.4	MGI:3649299	Gm12250	predicted gene 12250	3.18323	2.48827e-07	2.98331e-06	1.6584	0.00652511	0.0326745
ENSMUSG00000082361.7	MGI:99439	Btc	betacellulin, epidermal growth factor family member	2.58879	1.06709e-05	7.58019e-05	1.09417	0.0617413	0.170573
ENSMUSG00000082399.2	MGI:3649581	Gm14036	predicted gene 14036	0.587329	0.000115637	0.000603611	0.209571	0.179892	0.359291
ENSMUSG00000082419.4	MGI:3650957	Gm11425	predicted gene 11425	0.610699	0.000194206	0.000953297	0.272327	0.106173	0.249366
ENSMUSG00000082480.2	MGI:3652085	Gm11687	predicted gene 11687	0.765725	8.17049e-05	0.00044807	0.195226	0.334547	0.53874
ENSMUSG00000082510.2	MGI:3652124	Gm11793	predicted gene 11793	1.05247	5.5201e-07	5.8866e-06	0.203198	0.349866	0.553785
ENSMUSG00000082691.7	MGI:3642625	Dynlt1-ps1	dynein light chain Tctex-type 1, pseuodogene 1	1.24909	0.000107057	0.000564629	0.839985	0.0105724	0.0469816
ENSMUSG00000082762.2	MGI:3649557	Gm12366	predicted gene 12366	0.695028	1.00148e-06	9.87432e-06	0.188731	0.20135	0.386418
ENSMUSG00000082769.4	MGI:3783235	Gm15793	predicted gene 15793	0.831494	0.00134802	0.00512232	0.189004	0.470357	0.6631
ENSMUSG00000082809.4	MGI:3651006	Gm14150	predicted gene 14150	0.715836	9.56717e-09	1.79311e-07	0.217903	0.0808653	0.206105
ENSMUSG00000083087.2	MGI:3650834	Gm11249	predicted gene 11249	0.682809	1.09448e-05	7.7496e-05	0.194782	0.22475	0.415569
ENSMUSG00000083161.3	MGI:3651774	Gm11427	predicted gene 11427	2.39396	0.000215186	0.00104266	1.76504	0.0125938	0.0536061
ENSMUSG00000083220.2	MGI:3652001	Gm12919	predicted gene 12919	1.41109	0.00169764	0.00627771	0.645663	0.165059	0.338785
ENSMUSG00000083337.2	MGI:3651911	Gm11539	predicted gene 11539	0.605767	0.00173393	0.00639469	0.49627	0.0182508	0.0710209
ENSMUSG00000083382.2	MGI:3645394	Gm6433	predicted gene 6433	0.808282	0.000201927	0.000985556	-0.035766	0.87717	0.93755
ENSMUSG00000083483.4	MGI:3650452	Gm14044	predicted gene 14044	0.591771	0.000100975	0.000536995	0.0886827	0.557294	0.732281
ENSMUSG00000083500.2	MGI:3641891	Gm15470	predicted gene 15470	2.01214	6.02824e-10	1.65792e-08	0.698141	0.035491	0.114805
ENSMUSG00000083553.2	MGI:3702318	Gm11989	predicted gene 11989	0.797363	0.000272936	0.00128074	0.120894	0.587487	0.755354
ENSMUSG00000083668.2	MGI:3647868	Gm5648	predicted pseudogene 5648	3.45991	0.000124254	0.000642113	3.39629	0.00583617	0.0300315
ENSMUSG00000083716.5	MGI:3651005	Gm13436	predicted gene 13436	0.647094	1.82536e-07	2.2844e-06	0.298104	0.0184426	0.0716398
ENSMUSG00000083754.4	MGI:3646089	Gm7803	predicted gene 7803	0.800027	4.7708e-06	3.80056e-05	0.275802	0.123073	0.276316
ENSMUSG00000083892.4	MGI:3037706	Gm1848	predicted gene 1848	0.878633	0.00177671	0.00653529	0.603536	0.0544842	0.155935
ENSMUSG00000084215.4	MGI:3650512	Gm11814	predicted gene 11814	0.809049	0.00259811	0.00907402	0.00257724	0.992707	0.996881
ENSMUSG00000084279.2	MGI:3649252	Gm13232	predicted gene 13232	2.71396	1.6384e-05	0.000110462	2.3158	0.0018742	0.0124779
ENSMUSG00000084291.4	MGI:3648118	Gm6654	predicted pseudogene 6654	0.597151	0.00130082	0.0049719	0.41315	0.0382357	0.121206
ENSMUSG00000084353.2	MGI:3768636	Gm15452	predicted gene 15452	3.22331	4.38576e-07	4.81217e-06	1.44562	0.0125636	0.0535441
ENSMUSG00000084817.4	MGI:3643066	Gm5526	predicted pseudogene 5526	0.6339	4.8933e-09	1.0028e-07	0.209756	0.0571078	0.161406
ENSMUSG00000085129.2	MGI:2442533	5031425F14Rik	RIKEN cDNA 5031425F14 gene	4.40407	2.83256e-08	4.61491e-07	2.50057	0.00330322	0.0192601
ENSMUSG00000085156.9	MGI:3650059	Snhg15	small nucleolar RNA host gene 15	0.713411	5.48077e-06	4.28522e-05	-0.125561	0.468846	0.661747
ENSMUSG00000085175.8	MGI:3651335	Gm11423	predicted gene 11423	1.16443	0.00112554	0.00439271	0.177265	0.608417	0.768585
ENSMUSG00000085295.8	MGI:1918889	4930430E12Rik	RIKEN cDNA 4930430E12 gene	5.74692	0.000695585	0.00289247	-2.14466	0.277374	0.478101
ENSMUSG00000085316.2	MGI:2445155	D330050G23Rik	RIKEN cDNA D330050G23 gene	0.982553	2.1842e-06	1.93947e-05	0.378662	0.0857665	0.214939
ENSMUSG00000085609.2	MGI:1922792	1700016P03Rik	RIKEN cDNA 1700016P03 gene	2.39784	0.000106116	0.000560278	-0.716351	0.257944	0.456644
ENSMUSG00000085766.2	MGI:3590515	2810430I11Rik	RIKEN cDNA 2810430I11 gene	4.40073	0.00225681	0.00805018	-1.59122	0.357009
ENSMUSG00000085779.2	MGI:1916928	Atcayos	ataxia, cerebellar, Cayman type, opposite strand	3.71149	0.00178395	0.00655708	-0.334445	0.721719	0.845422
ENSMUSG00000085893.2	MGI:3650089	Gm12091	predicted gene 12091	0.635361	0.000625647	0.00264456	0.187906	0.341965	0.546097
ENSMUSG00000085996.2	MGI:2441830	A830012C17Rik	RIKEN cDNA A830012C17 gene	4.89355	6.19896e-05	0.000352939	2.52407	0.00765583	0.0366862
ENSMUSG00000086111.2	MGI:3705205	Gm15326	predicted gene 15326	2.64353	0.00139632	0.0052795	1.24639	0.133157	0.291897
ENSMUSG00000086229.4	MGI:3645730	Gm4887	predicted gene 4887	1.05722	3.62473e-07	4.08924e-06	0.368179	0.0925513	0.226792
ENSMUSG00000086298.2	MGI:3649215	Gm11716	predicted gene 11716	5.24957	3.63478e-05	0.000220694	1.55864	0.282844
ENSMUSG00000086331.2	MGI:3826522	Gm16310	predicted gene 16310	1.79674	0.00219428	0.00784449	0.940848	0.0997459	0.238701
ENSMUSG00000086513.4	MGI:1924950	Gvin-ps1	GTPase, very large interferon inducible, pseudogene 1	1.88943	7.21001e-06	5.43124e-05	0.955781	0.0278636	0.0963562
ENSMUSG00000086541.9	MGI:3643465	Has2os	hyaluronan synthase 2, opposite strand	1.77185	0.00164319	0.00609693	1.40062	0.019985	0.0757821
ENSMUSG00000086688.5	MGI:3652066	Gm11560	predicted gene 11560	0.756857	0.000152384	0.000769356	0.593368	0.00444096	0.0243367
ENSMUSG00000086712.3	MGI:2140270	Mexis	macrophage expressed LXRa(NR1H3)-dependent amplifier of Abca1 transcription lncRNA	4.2576	5.25214e-07	5.62554e-06	1.09324	0.249173	0.446011
ENSMUSG00000087084.2	MGI:3650527	Gm13016	predicted gene 13016	2.25408	0.000203734	0.000993843	-0.354844	0.586159	0.754341
ENSMUSG00000087107.9	MGI:2144254	AI662270	expressed sequence AI662270	3.40161	7.50754e-08	1.07106e-06	2.24532	0.0021694	0.0139451
ENSMUSG00000087135.8	MGI:3801985	Gm16096	predicted gene 16096	4.36875	0.000807875	0.00328683	3.09628	0.015978
ENSMUSG00000087150.8	MGI:3040692	BC064078	cDNA sequence BC064078	1.42307	0.00042603	0.00189547	0.788192	0.0524696	0.151613
ENSMUSG00000087184.2	MGI:3650132	Gm11650	predicted gene 11650	1.7065	0.000700402	0.00290941	1.24169	0.0165215	0.0658041
ENSMUSG00000087213.3	MGI:1917191	2810408I11Rik	RIKEN cDNA 2810408I11 gene	2.11811	2.83679e-06	2.42169e-05	1.52765	0.0072172	0.0350877
ENSMUSG00000087264.2	MGI:1916236	Gad1os	glutamate decarboxylase 1, opposite strand	2.47083	8.2804e-06	6.12486e-05	0.420671	0.489752	0.680088
ENSMUSG00000087286.2	MGI:3646930	Gm9013	predicted gene 9013	0.649117	0.00104847	0.00412526	0.12237	0.558256	0.733018
ENSMUSG00000087289.3	MGI:1914798	4933424M12Rik	RIKEN cDNA 4933424M12 gene	2.07429	0.00105459	0.00414697	1.467	0.0320949	0.106726
ENSMUSG00000087303.4	MGI:3644466	Lipo2	lipase, member O2	0.984106	0.00010172	0.000540328	0.546953	0.0380554	0.120793
ENSMUSG00000089669.8	MGI:1916833	Tnfsf13	tumor necrosis factor (ligand) superfamily, member 13	1.37621	4.52755e-05	0.000267324	0.177581	0.607627	0.767862
ENSMUSG00000089671.2	MGI:4414957	Gm16537	predicted gene 16537	2.43609	0.00222687	0.00795061	-0.156167	0.826053	0.908802
ENSMUSG00000089716.8	MGI:3779580	Gm6264	predicted gene 6264	2.60245	0.00141467	0.00534009	2.49591	0.011245	0.0492887
ENSMUSG00000089722.3	MGI:3702661	Cd300ld5	CD300 molecule like family member D5	3.01695	6.71039e-07	6.98818e-06	1.03159	0.121788	0.274244
ENSMUSG00000089753.10	MGI:3649405	Cd300ld2	CD300 molecule like family member D2	2.85675	0.00118952	0.00460949	1.08223	0.258462	0.457157
ENSMUSG00000089764.3	MGI:4415000	Gm16580	predicted gene 16580	0.615942	0.000400388	0.00179507	0.437557	0.0141014	0.0583898
ENSMUSG00000089942.10	MGI:1195970	Pira2	paired-Ig-like receptor A2	3.4296	0.000111877	0.000586776	2.40007	0.0155671	0.0629624
ENSMUSG00000089992.4	MGI:105977	G6pd2	glucose-6-phosphate dehydrogenase 2	2.47613	0.00285715	0.00983961	0.490513	0.466875	0.660166
ENSMUSG00000089999.2	MGI:3644007	Gm6485	predicted gene 6485	0.735123	1.36075e-06	1.28617e-05	0.240811	0.124688	0.278798
ENSMUSG00000090019.6	MGI:109368	Gimap1	GTPase, IMAP family member 1	1.34922	0.00022786	0.00109382	0.649085	0.0851122	0.213879
ENSMUSG00000090021.3	MGI:3644797	Gm6493	predicted gene 6493	0.757483	0.0018256	0.00668508	0.331695	0.184017	0.364457
ENSMUSG00000090066.3	MGI:1915066	1110002E22Rik	RIKEN cDNA 1110002E22 gene	1.02659	0.000420225	0.00187359	0.498664	0.0875582	0.218201
ENSMUSG00000090222.3	MGI:3840117	Ifi203-ps	interferon activated gene 203, pseudogene	1.55499	0.000115566	0.000603353	0.366573	0.380217	0.582811
ENSMUSG00000090230.2	MGI:3826564	Gm16315	predicted gene 16315	3.68926	0.00118699	0.00460291	0.975693	0.395014
ENSMUSG00000090394.9	MGI:1914897	4930523C07Rik	RIKEN cDNA 4930523C07 gene	0.924369	0.000725306	0.0029972	0.675658	0.0177134	0.0693676
ENSMUSG00000090460.4	MGI:4937145	Gm17511	predicted gene, 17511	0.937415	0.000222003	0.00106945	0.763169	0.0041716	0.0232205
ENSMUSG00000090544.4	MGI:3646644	Gm6576	predicted gene 6576	0.634171	0.00131709	0.00502298	0.222005	0.276504	0.476908
ENSMUSG00000090675.3	MGI:2177494	Olfr111	olfactory receptor 111	2.27625	0.000519599	0.00225434	1.57203	0.0566818	0.160521
ENSMUSG00000090698.3	MGI:2685921	Apold1	apolipoprotein L domain containing 1	0.786758	0.00210982	0.00758011	0.16664	0.520878	0.704025
ENSMUSG00000090841.3	MGI:109318	Myl6	myosin, light polypeptide 6, alkali, smooth muscle and non-muscle	0.628296	1.30698e-09	3.23733e-08	0.16574	0.110278	0.256105
ENSMUSG00000090881.4	MGI:3644962	Phf11	PHD finger protein 11	4.12016	4.19628e-05	0.000250189	2.99681	0.00685099	0.0338411
ENSMUSG00000090942.2	MGI:3588218	F830016B08Rik	RIKEN cDNA F830016B08 gene	3.65376	3.82059e-05	0.000230507	2.55658	0.00469214	0.0253834
ENSMUSG00000090958.3	MGI:93882	Lrrc32	leucine rich repeat containing 32	1.65105	3.52289e-06	2.9122e-05	0.129811	0.717125	0.84264
ENSMUSG00000091133.2	MGI:4937935	Gm17108	predicted gene 17108	1.24024	0.000701711	0.00291397	0.697093	0.0685057	0.183996
ENSMUSG00000091144.3	MGI:3648476	Phf11c	PHD finger protein 11C	2.2765	5.79506e-06	4.49888e-05	0.93861	0.0680896	0.183144
ENSMUSG00000091269.3	MGI:3647156	Gm6682	predicted gene 6682	0.680066	6.65648e-08	9.63363e-07	0.337566	0.00744607	0.0359532
ENSMUSG00000091586.3	MGI:3646233	Cyp4f17	cytochrome P450, family 4, subfamily f, polypeptide 17	0.629734	0.00217729	0.00779188	0.36463	0.0940514	0.229273
ENSMUSG00000091639.3	MGI:3781931	Gm3756	predicted gene 3756	0.64338	7.47781e-07	7.6651e-06	0.272141	0.036533	0.11734
ENSMUSG00000091712.3	MGI:3616084	Sec14l5	SEC14-like lipid binding 5	0.769307	0.00039762	0.00178383	0.682216	0.00179321	0.0120589
ENSMUSG00000091845.2	MGI:3782787	Rpl36-ps12	ribosomal protein L36, pseudogene 12	0.721539	0.0012195	0.00470769	0.517526	0.0268594	0.0937193
ENSMUSG00000091938.4	MGI:3708691	Gm2564	predicted gene 2564	3.15161	0.00126666	0.00486234	0.79218	0.300225	0.503502
ENSMUSG00000091952.4	MGI:4937343	Gm17709	predicted gene, 17709	1.56634	4.64913e-09	9.59934e-08	0.470527	0.0914473	0.224955
ENSMUSG00000092224.3	MGI:3648635	Gm8815	predicted gene 8815	2.14519	0.0018407	0.00673319	0.720967	0.318471	0.522024
ENSMUSG00000092366.3	MGI:5009946	Gm17782	predicted gene, 17782	2.09701	0.000627053	0.00264927	1.74595	0.0160914	0.0646047
ENSMUSG00000092463.2	MGI:5141954	Gm20489	predicted gene 20489	2.76818	1.21773e-06	1.17077e-05	1.14236	0.0596149	0.166303
ENSMUSG00000093674.8	MGI:1915195	Rpl41	ribosomal protein L41	0.820024	6.29788e-09	1.24865e-07	0.41151	0.00360549	0.0206036
ENSMUSG00000093726.2	MGI:5313114	Gm20667	predicted gene 20667	3.34585	2.38758e-06	2.09028e-05	1.90733	0.01784	0.0697726
ENSMUSG00000094017.2	MGI:3649984	Gm13160	predicted gene 13160	2.4237	7.39367e-06	5.54829e-05	1.93494	0.001901	0.0126074
ENSMUSG00000094526.2	MGI:5434806	Gm21451	predicted gene, 21451	3.15958	5.28182e-05	0.000306384	1.01415	0.220575	0.41047
ENSMUSG00000094530.3	MGI:5434754	Gm21399	predicted gene, 21399	0.881046	2.56558e-05	0.000163335	0.551556	0.0103388	0.0462086
ENSMUSG00000094796.3	MGI:4840510	BC147527	cDNA sequence BC147527	2.87282	9.01758e-05	0.000487504	2.41356	0.00178181	0.0119957
ENSMUSG00000095028.7	MGI:3779828	Sirpb1b	signal-regulatory protein beta 1B	3.74435	0.000919644	0.00367697	1.22887	0.357874	0.561046
ENSMUSG00000095115.3	MGI:2442416	Itpripl2	inositol 1,4,5-triphosphate receptor interacting protein-like 2	1.53662	1.33157e-07	1.7453e-06	0.928689	0.00158956	0.0109655
ENSMUSG00000095134.3	MGI:5780070	Mid1-ps1	midline 1, pseudogene 1	1.41041	2.31966e-05	0.000150189	0.879363	0.00870068	0.0405087
ENSMUSG00000095427.3	MGI:3644876	Rps2-ps6	ribosomal protein S2, pseudogene 6	0.699351	2.68891e-07	3.18101e-06	0.16335	0.24291	0.438489
ENSMUSG00000095457.4	MGI:3704114	Gvin-ps5	GTPase, very large interferon inducible, pseudogene 5	1.78114	3.47777e-06	2.88446e-05	0.887395	0.0244452	0.0875967
ENSMUSG00000095609.3	MGI:5434543	Gm21188	predicted gene, 21188	7.328	3.5177e-06	2.90878e-05	2.82065	0.0950961	0.23121
ENSMUSG00000095649.4	MGI:3703149	Gvin-ps3	GTPase, very large interferon inducible, pseudogene 3	1.71719	1.37686e-05	9.46677e-05	0.706968	0.0801752	0.204943
ENSMUSG00000095677.3	MGI:3780996	Dynlt1f	dynein light chain Tctex-type 1F	1.16314	1.12906e-05	7.96061e-05	0.771343	0.00430463	0.0237957
ENSMUSG00000095788.7	MGI:2444824	Sirpb1a	signal-regulatory protein beta 1A	4.12575	7.74777e-05	0.000427109	2.61299	0.0760899	0.197547
ENSMUSG00000096145.3	MGI:106442	Vkorc1	vitamin K epoxide reductase complex, subunit 1	1.12364	4.68024e-09	9.64903e-08	0.388623	0.0446232	0.135044
ENSMUSG00000096173.3	MGI:3781329	Gm3150	predicted gene 3150	1.38753	6.53413e-06	4.97545e-05	0.690368	0.0398996	0.124916
ENSMUSG00000096255.3	MGI:98643	Dynlt1b	dynein light chain Tctex-type 1B	1.18636	5.21859e-06	4.11189e-05	0.669207	0.0112072	0.0491755
ENSMUSG00000096351.3	MGI:2446220	Samd11	sterile alpha motif domain containing 11	1.58966	3.93573e-06	3.20897e-05	-0.168188	0.655956	0.802454
ENSMUSG00000096755.3	MGI:5434102	Ftl1-ps2	ferritin light polypeptide, pseudogene 2	1.82612	1.86667e-08	3.21912e-07	0.865648	0.00987024	0.0445532
ENSMUSG00000096842.2	MGI:3704412	Gm10736	predicted gene 10736	0.886416	1.46706e-05	0.000100017	0.614254	0.00322387	0.0189731
ENSMUSG00000096956.3	MGI:1914085	Snhg18	small nucleolar RNA host gene 18	0.805548	0.000784589	0.00320474	0.316503	0.214762	0.403398
ENSMUSG00000096971.3	MGI:1922509	4930556M19Rik	RIKEN cDNA 4930556M19 gene	2.19616	0.000111158	0.000583674	0.350123	0.544301	0.721722
ENSMUSG00000097006.8	MGI:3603340	9530082P21Rik	RIKEN cDNA 9530082P21 gene	0.885414	0.000538056	0.00232339	0.538431	0.0434834	0.132764
ENSMUSG00000097101.4	MGI:1913753	1810034E14Rik	RIKEN cDNA 1810034E14 gene	1.94902	0.00289153	0.00994427	1.96871	0.00704261	0.0345086
ENSMUSG00000097125.3	MGI:5477379	Gm26885	predicted gene, 26885	1.46553	2.0963e-05	0.000137054	1.00683	0.00329038	0.0192186
ENSMUSG00000097156.8	MGI:3781938	Gm3764	predicted gene 3764	0.613713	3.04565e-07	3.53495e-06	0.066323	0.580498	0.749918
ENSMUSG00000097180.6	MGI:1914444	2700038G22Rik	RIKEN cDNA 2700038G22 gene	1.07781	0.000618941	0.00262154	0.152675	0.626886	0.782382
ENSMUSG00000097295.2	MGI:96114	Hmgb1-ps8	high mobility group box 1, pseudogene 8	1.06389	0.000768092	0.00314956	0.770984	0.0171797	0.0678727
ENSMUSG00000097328.8	MGI:1196259	Tnfsf12	tumor necrosis factor (ligand) superfamily, member 12	0.912576	3.0518e-05	0.000189881	0.551472	0.0129438	0.0547373
ENSMUSG00000097467.3	MGI:5477231	Gm26737	predicted gene, 26737	1.43213	0.000463161	0.00203883	0.477029	0.267372	0.466702
ENSMUSG00000097471.9	MGI:1915015	5830432E09Rik	RIKEN cDNA 5830432E09 gene	2.32711	8.70553e-05	0.000473341	1.53253	0.030106	0.10184
ENSMUSG00000097519.3	MGI:1922573	4930558J18Rik	RIKEN cDNA 4930558J18 gene	3.76291	0.00119937	0.00463913	2.00435	0.0577924	0.162768
ENSMUSG00000097558.2	MGI:5477396	Gm26902	predicted gene, 26902	1.91549	0.000119891	0.000622614	-0.304219	0.54201	0.720393
ENSMUSG00000097900.2	MGI:3643616	Gm8652	predicted gene 8652	0.677452	0.00122427	0.00472343	-0.00103494	0.996124	0.998473
ENSMUSG00000098027.2	MGI:5504119	Gm27004	predicted gene, 27004	1.80787	3.10724e-06	2.61933e-05	0.721667	0.0631233	0.173098
ENSMUSG00000098050.2	MGI:3644320	Gm5345	predicted gene 5345	0.984501	0.00179004	0.00657418	0.307402	0.34834	0.552185
ENSMUSG00000098426.2	MGI:5520992	Gm27149	predicted gene 27149	3.75471	0.00235588	0.00835249	0.793281	0.509285
ENSMUSG00000098470.2	MGI:3779804	C1rb	complement component 1, r subcomponent B	1.71613	0.000781484	0.00319444	0.881375	0.0911225	0.224432
ENSMUSG00000098651.3	MGI:5531055	Mir6999	microRNA 6999	1.72993	3.54873e-05	0.000216534	0.47196	0.262659	0.461512
ENSMUSG00000098713.2	MGI:3647821	Rps2-ps5	ribosomal protein S2, pseudogene 5	0.905153	2.77776e-09	6.20245e-08	0.191169	0.226261	0.417655
ENSMUSG00000098934.2	MGI:5011038	Gvin-ps4	GTPase, very large interferon inducible, pseudogene 4	1.96852	1.43683e-05	9.82415e-05	0.91042	0.0503124	0.147067
ENSMUSG00000099032.3	MGI:3780500	Tcf24	transcription factor 24	1.16315	0.00063403	0.00267299	0.336395	0.389672	0.592096
ENSMUSG00000099241.3	MGI:5011037	Gvin-ps2	GTPase, very large interferon inducible, pseudogene 2	2.18025	6.76833e-05	0.000381397	1.22251	0.0318826	0.106413
ENSMUSG00000099397.2	MGI:3643362	Gm7809	predicted gene 7809	2.14722	5.24701e-09	1.06494e-07	1.04001	0.00881766	0.0409238
ENSMUSG00000099398.2	MGI:2686122	Ms4a14	membrane-spanning 4-domains, subfamily A, member 14	4.46614	6.11675e-06	4.70731e-05	1.00739	0.34382	0.54762
ENSMUSG00000099470.2	MGI:5580046	Gm29340	predicted gene 29340	2.20593	0.00288915	0.00993735	1.86673	0.0706963	0.187885
ENSMUSG00000099871.2	MGI:5433906	Gm21742	predicted gene, 21742	1.28453	0.000887256	0.00356776	0.551993	0.153932	0.323401
ENSMUSG00000099913.2	MGI:5579257	Gm28551	predicted gene 28551	0.597529	8.15234e-06	6.04481e-05	0.154866	0.253144	0.450435
ENSMUSG00000100199.2	MGI:5012509	Gm20324	predicted gene, 20324	2.65879	0.00112432	0.00438909	0.887618	0.303413	0.506694
ENSMUSG00000100309.2	MGI:3644951	Gm6644	predicted gene 6644	0.748295	0.000310895	0.00143825	0.305716	0.150474	0.318507
ENSMUSG00000100396.2	MGI:5580073	Gm29367	predicted gene 29367	0.96281	0.00019231	0.000944836	-0.132225	0.606462	0.767428
ENSMUSG00000100599.3	MGI:1920850	1700120C14Rik	RIKEN cDNA 1700120C14 gene	0.895555	0.000435623	0.00193438	0.284975	0.305226	0.508485
ENSMUSG00000100779.2	MGI:5579998	Gm29292	predicted gene 29292	4.20509	0.000521191	0.00226053	1.06751	0.356156
ENSMUSG00000100807.3	MGI:5580227	Gm29521	predicted gene 29521	3.73754	1.18802e-06	1.14743e-05	0.857184	0.258262	0.456938
ENSMUSG00000100839.2	MGI:3645716	Gm5920	predicted gene 5920	1.49134	0.00215693	0.00772807	-0.135466	0.789671	0.887872
ENSMUSG00000100922.2	MGI:3645038	Gm8520	predicted gene 8520	0.750309	0.000198942	0.000972891	0.0620889	0.765789	0.872544
ENSMUSG00000100975.3	MGI:5579581	Gm28875	predicted gene 28875	1.33773	0.000379039	0.00171054	0.462947	0.255217	0.453027
ENSMUSG00000101334.2	MGI:1916710	1700028M03Rik	RIKEN cDNA 1700028M03 gene	4.19212	0.00199292	0.00720666	4.74779	0.000493759
ENSMUSG00000101389.2	MGI:3643932	Ms4a4a	membrane-spanning 4-domains, subfamily A, member 4A	3.60762	4.2011e-06	3.39405e-05	0.668206	0.419265	0.620357
ENSMUSG00000101496.2	MGI:3649121	Gm8885	predicted gene 8885	0.702421	0.0029086	0.00999291	-0.115781	0.647835	0.79694
ENSMUSG00000101969.3	MGI:5012310	Gm20125	predicted gene, 20125	3.59635	2.07612e-06	1.85416e-05	1.46511	0.0109475	0.0482736
ENSMUSG00000102051.2	MGI:3612406	Ly6a2	lymphocyte antigen 6 complex, locus A2	1.0696	0.00145157	0.0054628	0.333631	0.345536	0.549576
ENSMUSG00000102224.6	MGI:1924123	4930447F24Rik	RIKEN cDNA 4930447F24 gene	2.36037	0.000119446	0.000620856	0.37533	0.522711	0.705348
ENSMUSG00000102543.6	MGI:1935205	Pcdhgc5	protocadherin gamma subfamily C, 5	0.645759	6.99466e-12	3.82059e-10	0.280108	0.0029618	0.0178012
ENSMUSG00000102573.2	MGI:3648991	Gm7265	predicted gene 7265	1.33207	2.40355e-05	0.000154744	0.867225	0.00562858	0.0291757
ENSMUSG00000102805.6	MGI:5610468	Gm37240	predicted gene, 37240	0.728989	2.20947e-07	2.69141e-06	0.303611	0.033087	0.108963
ENSMUSG00000102813.2	MGI:5611023	Gm37795	predicted gene, 37795	2.03277	0.000230816	0.00110627	1.19921	0.0428069	0.131143
ENSMUSG00000102882.2	MGI:3780232	Gm2065	predicted gene 2065	4.30067	0.00231866	0.0082333	2.71481	0.0617302
ENSMUSG00000103308.6	MGI:5611028	Gm37800	predicted gene, 37800	5.42912	0.000547401	0.00235817	-0.697319	0.689428
ENSMUSG00000103309.2	MGI:3697820	BC037039	cDNA sequence BC037039	1.25506	4.05218e-05	0.000242706	0.0443195	0.888908	0.944757
ENSMUSG00000103313.2	MGI:5611585	Gm38357	predicted gene, 38357	1.01772	8.34271e-05	0.000456328	0.0470464	0.86014	0.928074
ENSMUSG00000103469.2	MGI:3642577	Gm9910	predicted gene 9910	4.3212	0.000210025	0.00102035	-1.741	0.101271
ENSMUSG00000103749.2	MGI:1935196	Pcdhgb5	protocadherin gamma subfamily B, 5	0.585525	7.72168e-11	2.84581e-09	0.279381	0.00193382	0.0127792
ENSMUSG00000103865.2	MGI:5610644	Gm37416	predicted gene, 37416	0.910766	0.00142909	0.00538784	0.198037	0.547138	0.723727
ENSMUSG00000103880.2	MGI:5610237	Gm37009	predicted gene, 37009	1.14405	1.53174e-05	0.000104141	-0.0419353	0.868664	0.93292
ENSMUSG00000104074.2	MGI:5610253	Gm37025	predicted gene, 37025	0.666043	0.00147834	0.00554985	0.162532	0.474792	0.667162
ENSMUSG00000104126.2	MGI:5610714	Gm37486	predicted gene, 37486	0.80994	1.25561e-05	8.72057e-05	-0.0177347	0.927803	0.965222
ENSMUSG00000104217.2	MGI:5611216	Gm37988	predicted gene, 37988	0.587001	7.47223e-06	5.60111e-05	-0.0740332	0.580355	0.749918
ENSMUSG00000104280.2	MGI:3648819	Rps2-ps11	ribosomal protein S2, pseudogene 11	0.771573	0.000127433	0.00065656	0.428987	0.0464449	0.138809
ENSMUSG00000104850.2	MGI:5663038	Gm42901	predicted gene 42901	2.29131	0.00216092	0.00774135	1.61044	0.0247694	0.0884817
ENSMUSG00000105031.2	MGI:3781688	Gm3511	predicted gene 3511	0.690134	4.97609e-05	0.000290616	0.443445	0.0119944	0.051742
ENSMUSG00000105076.2	MGI:3612704	A930003O13Rik	RIKEN cDNA A930003O13 gene	2.86018	4.94587e-05	0.000289036	1.99334	0.0057472	0.029669
ENSMUSG00000105077.2	MGI:3646906	Gm4859	predicted gene 4859	0.585792	0.00118171	0.00458506	0.337669	0.0752235	0.196123
ENSMUSG00000105096.2	MGI:4359647	Gbp10	guanylate-binding protein 10	1.79988	9.75735e-05	0.000522301	1.45383	0.0022728	0.0144935
ENSMUSG00000105397.2	MGI:5663608	Gm43471	predicted gene 43471	0.775908	0.00244518	0.00862118	0.162506	0.55392	0.729116
ENSMUSG00000105509.2	MGI:3697343	C130013H08Rik	RIKEN cDNA C130013H08 gene	1.06822	1.81109e-05	0.000120739	0.334584	0.186952	0.367651
ENSMUSG00000105617.5	MGI:5663946	Gm43809	predicted gene 43809	0.791532	8.005e-07	8.1145e-06	0.259767	0.120227	0.271704
ENSMUSG00000105736.2	MGI:5662593	Gm42456	predicted gene 42456	1.69817	0.0010025	0.00396834	0.250471	0.647678	0.796869
ENSMUSG00000105769.2	MGI:5663488	Gm43351	predicted gene 43351	4.90072	0.000147065	0.000746348	3.60502	0.0089047	0.0412243
ENSMUSG00000105813.2	MGI:5663065	Gm42928	predicted gene 42928	3.74727	4.90077e-06	3.89054e-05	2.24331	0.0100458	0.0451678
ENSMUSG00000105993.2				1.88393	0.000955052	0.00380191	-1.62996	0.00783499	0.0373288
ENSMUSG00000106219.2	MGI:1922007	5830416I19Rik	RIKEN cDNA 5830416I19 gene	2.63343	2.40996e-05	0.000155011	1.44288	0.0455768	0.136981
ENSMUSG00000106239.2	MGI:3645725	Gm9260	predicted gene 9260	1.30279	2.9295e-06	2.49182e-05	0.56409	0.0544551	0.155889
ENSMUSG00000106258.2	MGI:3645560	Rpl7a-ps7	ribosomal protein L7A, pseudogene 7	0.608092	0.00110411	0.00431634	0.184439	0.338042	0.542356
ENSMUSG00000106326.2	MGI:5663114	Gm42977	predicted gene 42977	0.926099	0.000917527	0.00366904	-0.181182	0.533952	0.714298
ENSMUSG00000106334.2	MGI:5663686	Gm43549	predicted gene 43549	2.02688	0.00117583	0.00456545	1.51421	0.0321051	0.106726
ENSMUSG00000106342.2	MGI:5663028	Gm42891	predicted gene 42891	2.71189	2.25819e-05	0.000146694	1.3711	0.0296831	0.10082
ENSMUSG00000106407.2	MGI:5663576	Gm43439	predicted gene 43439	2.09906	0.000220451	0.00106384	0.958085	0.118443	0.268757
ENSMUSG00000106438.2	MGI:5591210	Gm32051	predicted gene, 32051	4.24698	0.000855181	0.00345449	0.844369	0.489211
ENSMUSG00000106558.2	MGI:3643001	Gm5552	predicted gene 5552	1.39833	0.00187895	0.00685115	1.53392	0.00224033	0.014313
ENSMUSG00000106734.4	MGI:5295666	Gm20559	predicted gene, 20559	2.33918	1.27937e-08	2.31705e-07	1.21186	0.00378466	0.0214467
ENSMUSG00000106820.2	MGI:1277165	D5Ertd605e	DNA segment, Chr 5, ERATO Doi 605, expressed	3.18964	0.000416048	0.00185708	1.41307	0.0680003	0.182986
ENSMUSG00000107035.2	MGI:2137671	Ybx1-ps2	Y box protein 1, pseudogene 2	1.17506	4.4699e-07	4.89476e-06	0.587957	0.012487	0.0533309
ENSMUSG00000107092.2	MGI:3647399	Gm7993	predicted gene 7993	1.52139	1.06965e-11	5.44154e-10	0.432183	0.0643446	0.175426
ENSMUSG00000107215.2	MGI:5663334	Gm43197	predicted gene 43197	2.61384	2.99691e-06	2.54334e-05	0.876289	0.102154	0.242749
ENSMUSG00000107261.2	MGI:3643840	Trmt112-ps1	tRNA methyltransferase 11-2, pseudogene 1	0.760098	0.000391134	0.00175825	-0.0582702	0.795933	0.89191
ENSMUSG00000107355.2	MGI:2140975	AI839979	expressed sequence AI839979	2.72537	1.23221e-06	1.18385e-05	1.64049	0.00769422	0.0368333
ENSMUSG00000107638.3	MGI:5589683	Gm30524	predicted gene, 30524	2.25776	0.000924512	0.00369361	1.23831	0.116739	0.266274
ENSMUSG00000107696.2	MGI:5690563	Gm44171	predicted gene, 44171	3.76336	0.000834629	0.00338393	0.940581	0.348856	0.552748
ENSMUSG00000108112.2	MGI:5753769	Gm45193	predicted gene 45193	1.98334	7.59958e-07	7.7638e-06	1.01217	0.0128027	0.0542936
ENSMUSG00000108801.2	MGI:5621975	Gm39090	predicted gene, 39090	2.03786	0.000852692	0.00344697	1.35168	0.0287755	0.0987147
ENSMUSG00000108865.2	MGI:5753193	Gm44617	predicted gene 44617	5.07016	3.48101e-05	0.000212914	0.913551	0.278361	0.478998
ENSMUSG00000108892.2	MGI:3779859	Gm9449	predicted gene 9449	1.17703	2.61885e-05	0.00016634	0.545805	0.0704139	0.187404
ENSMUSG00000108905.2	MGI:5753194	Gm44618	predicted gene 44618	5.02328	0.000215814	0.00104552	1.80808	0.152517	0.321423
ENSMUSG00000109284.2	MGI:2686541	B230311B06Rik	RIKEN cDNA B230311B06 gene	0.754346	0.00276263	0.00955852	0.83546	0.00153753	0.0106986
ENSMUSG00000109336.2	MGI:2448542	Samd4b	sterile alpha motif domain containing 4B	0.691574	1.57876e-08	2.78928e-07	0.202146	0.100324	0.239641
ENSMUSG00000109509.2	MGI:3780139	Rps12-ps4	ribosomal protein S12, pseudogene 4	0.608707	0.000230974	0.0011065	0.306528	0.0712846	0.188989
ENSMUSG00000109603.2	MGI:5591548	Gm32389	predicted gene, 32389	1.93035	0.00132296	0.00504178	2.02095	0.00373396	0.0212017
ENSMUSG00000109604.2	MGI:5791182	Gm45346	predicted gene 45346	1.47463	0.00245286	0.00864491	0.767191	0.12731	0.282767
ENSMUSG00000109608.2	MGI:5791433	Gm45597	predicted gene 45597	2.6498	0.00100753	0.00398535	0.842036	0.264127	0.463021
ENSMUSG00000109610.2	MGI:3645713	Gm7432	predicted gene 7432	0.591081	0.00013677	0.000699671	0.166263	0.299501	0.502674
ENSMUSG00000109675.3	MGI:3646632	Nxpe1-ps	neurexophilin and PC-esterase domain family, member 1, pseudogene	2.15217	0.000701536	0.00291368	1.0954	0.104698	0.247107
ENSMUSG00000109770.2	MGI:5589244	Gm30085	predicted gene, 30085	2.7482	1.57626e-09	3.78799e-08	1.31117	0.00445128	0.0243766
ENSMUSG00000109853.2	MGI:5592204	Gm33045	predicted gene, 33045	1.61418	0.00105164	0.00413714	0.988077	0.0475595	0.141001
ENSMUSG00000110206.2	MGI:95560	Flt3l	FMS-like tyrosine kinase 3 ligand	0.706865	0.000525917	0.00227922	0.547789	0.00778949	0.0371636
ENSMUSG00000110447.2	MGI:5590677	Gm31518	predicted gene, 31518	2.5949	0.000363257	0.00164745	0.0839516	0.907078	0.954316
ENSMUSG00000110537.2	MGI:3782497	Gm4316	predicted gene 4316	0.866694	0.000453696	0.00200231	-0.049388	0.851555	0.922692
ENSMUSG00000110545.2	MGI:3647355	Gm7730	predicted gene 7730	0.853038	1.72434e-06	1.57605e-05	0.371929	0.0434042	0.132635
ENSMUSG00000110588.2	MGI:5804889	Gm45774	predicted gene 45774	2.3105	1.23383e-05	8.59981e-05	0.351306	0.516344	0.700449
ENSMUSG00000110631.2	MGI:5624932	Gm42047	predicted gene, 42047	1.79804	0.00290836	0.00999291	1.89425	0.00209489	0.0135646
ENSMUSG00000110682.2	MGI:3037766	A530010L16Rik	RIKEN cDNA A530010L16 gene	4.33096	0.000634128	0.00267299	1.47728	0.17617
ENSMUSG00000110686.2	MGI:5804970	Gm45855	predicted gene 45855	0.588601	6.91121e-05	0.000388172	0.18782	0.220834	0.410797
ENSMUSG00000111088.2	MGI:1924680	9430081H08Rik	RIKEN cDNA 9430081H08 gene	1.58622	8.92343e-05	0.000483367	-0.733874	0.116051	0.26541
ENSMUSG00000111232.2	MGI:5439419	A730043L09Rik	RIKEN cDNA A730043L09 gene	2.97904	0.000314838	0.00145334	0.85766	0.169475	0.344875
ENSMUSG00000111977.2	MGI:6095939	Gm47163	predicted gene, 47163	1.11736	1.25567e-06	1.20386e-05	0.196287	0.393879	0.596338
ENSMUSG00000112023.2	MGI:102702	Lilr4b	leukocyte immunoglobulin-like receptor, subfamily B, member 4B	4.86421	4.10124e-11	1.68096e-09	1.82123	0.0253164	0.0898716
ENSMUSG00000112095.2	MGI:2441782	A130077B15Rik	RIKEN cDNA A130077B15 gene	1.67043	0.000230591	0.00110539	1.32739	0.00431221	0.0238267
ENSMUSG00000112105.2	MGI:3646014	Rps7-ps2	ribosomal protein S7, pseudogene 2	1.52733	5.28248e-09	1.06976e-07	0.349008	0.201702	0.386846
ENSMUSG00000112140.2	MGI:3645288	Gm5780	predicted gene 5780	1.05519	0.000820324	0.00333382	0.809949	0.0194377	0.0743914
ENSMUSG00000112148.2	MGI:102701	Lilrb4a	leukocyte immunoglobulin-like receptor, subfamily B, member 4A	4.95355	2.15623e-13	1.98402e-11	1.68073	0.016997	0.0672191
ENSMUSG00000112471.2	MGI:3645934	Gm5779	predicted gene 5779	3.74671	0.00167088	0.00618794	-0.303571	0.697139	0.829536
ENSMUSG00000112478.2	MGI:6096912	Gm47761	predicted gene, 47761	2.19955	0.000308733	0.00142998	1.35946	0.0451988	0.13624
ENSMUSG00000112714.2	MGI:3644096	Gm4798	predicted pseudogene 4798	1.03302	0.000210132	0.00102069	-0.776084	0.00645302	0.032441
ENSMUSG00000112716.2	MGI:1922162	4930471E19Rik	RIKEN cDNA 4930471E19 gene	6.88474	0.000581584	0.00248396	3.77726	0.0621258	0.171281
ENSMUSG00000112980.2	MGI:2442237	D430020J02Rik	RIKEN cDNA D430020J02 gene	1.85404	1.16116e-06	1.12426e-05	0.608681	0.111078	0.257466
ENSMUSG00000113061.2	MGI:3649931	Rps18-ps5	ribosomal protein S18, pseudogene 5	0.644342	1.17844e-05	8.26608e-05	0.375375	0.0120152	0.0517945
ENSMUSG00000113258.2	MGI:3644947	Gm7446	predicted gene 7446	0.793663	9.70848e-06	7.02021e-05	0.18552	0.309711	0.513394
ENSMUSG00000113275.2	MGI:2145100	Tubb2a-ps2	tubulin, beta 2a, pseudogene 2	0.668054	3.03262e-07	3.52349e-06	0.20895	0.111322	0.257932
ENSMUSG00000113302.2	MGI:5591378	Gm32219	predicted gene, 32219	3.13572	3.95455e-07	4.40072e-06	1.84679	0.00279113	0.0170161
ENSMUSG00000113314.2	MGI:3780890	Gm2721	predicted gene 2721	1.94564	0.0026555	0.00924269	-0.524314	0.448961	0.645891
ENSMUSG00000113412.2	MGI:3646226	Gm5191	predicted gene 5191	1.04376	0.0013726	0.00520276	0.211148	0.482665	0.673931
ENSMUSG00000113479.2	MGI:6096970	Gm47796	predicted gene, 47796	5.47424	4.87829e-05	0.000285634	-2.88474	0.0510314
ENSMUSG00000113651.2	MGI:3646967	Gm4900	predicted gene 4900	1.33248	0.000627295	0.00264948	0.612333	0.17406	0.351587
ENSMUSG00000113756.2	MGI:5010210	Gm18025	predicted gene, 18025	0.854519	0.000277349	0.00129932	0.116957	0.648058	0.797055
ENSMUSG00000113769.2	MGI:1923205	5033406O09Rik	RIKEN cDNA 5033406O09 gene	3.39888	8.43179e-15	1.32873e-12	1.03731	0.021065	0.0787961
ENSMUSG00000113836.2	MGI:3781503	Gm3325	predicted gene 3325	0.606219	0.00285167	0.00982249	0.052765	0.801795	0.894476
ENSMUSG00000114251.2	MGI:3782198	Tmed10-ps	transmembrane p24 trafficking protein 10, pseudogene	0.962662	5.00029e-08	7.54975e-07	0.449238	0.0122046	0.0524417
ENSMUSG00000114533.2	MGI:3648867	Gm8416	predicted gene 8416	3.17937	5.60409e-05	0.000322608	3.44843	0.00410105	0.0228808
ENSMUSG00000114547.2	MGI:3804968	Gm3226	predicted gene 3226	0.663981	2.11646e-08	3.58651e-07	0.224448	0.0583899	0.16399
ENSMUSG00000114608.2	MGI:5595320	Gm36161	predicted gene, 36161	5.35553	1.51982e-05	0.000103357	2.76281	0.0662153	0.17928
ENSMUSG00000114635.2	MGI:6121621	Gm49392	predicted gene, 49392	2.50197	0.000140223	0.00071573	1.30609	0.0561366	0.159451
ENSMUSG00000114660.2	MGI:6097107	Gm47881	predicted gene, 47881	2.29913	3.92543e-06	3.20343e-05	1.10393	0.0443055	0.134421
ENSMUSG00000114709.2	MGI:6097174	Gm47920	predicted gene, 47920	1.69992	0.000606978	0.00257757	1.27858	0.00449859	0.0245462
ENSMUSG00000114755.2	MGI:1329003	Galr3	galanin receptor 3	5.9058	7.60446e-05	0.000420561	3.03037	0.046845	0.139623
ENSMUSG00000114932.2	MGI:3648727	Gm4936	predicted gene 4936	0.976696	0.000674823	0.0028181	0.266768	0.393694	0.596198
ENSMUSG00000114980.2	MGI:1918514	4933432I03Rik	RIKEN cDNA 4933432I03 gene	3.98821	0.0025621	0.00896998	3.99988	0.00257858
ENSMUSG00000115067.2	MGI:2442042	Dpep2	dipeptidase 2	5.2172	3.7093e-05	0.000224523	1.30127	0.457343	0.653064
ENSMUSG00000115146.2	MGI:3782861	Gm4681	predicted gene 4681	1.91023	0.00110395	0.0043163	-0.686722	0.234755	0.428726
ENSMUSG00000115149.2	MGI:2686435	9330188P03Rik	RIKEN cDNA 9330188P03 gene	2.48184	1.15634e-10	4.04423e-09	1.03044	0.00905255	0.041764
ENSMUSG00000115219.3	MGI:5903914	Eef1akmt4	EEF1A lysine methyltransferase 4	0.906183	0.000194624	0.000955008	0.0144092	0.954699	0.978676
ENSMUSG00000115230.2	MGI:2146144	AU022793	expressed sequence AU022793	2.78005	6.88615e-05	0.000387082	1.56645	0.0782056	0.201219
ENSMUSG00000115247.2	MGI:3779571	Gm6201	predicted gene 6201	2.66034	6.63057e-06	5.03909e-05	2.07706	0.00266268	0.016426
ENSMUSG00000115248.2	MGI:6118410	Gm49037	predicted gene, 49037	1.24024	3.95704e-06	3.22347e-05	0.465734	0.105053	0.247777
ENSMUSG00000115406.2	MGI:6118795	Gm49300	predicted gene, 49300	1.8085	0.00119917	0.004639	0.0176059	0.971047	0.986702
ENSMUSG00000115602.2	MGI:3645647	Gm7908	predicted gene 7908	0.608518	0.00263292	0.00917107	0.280073	0.201775	0.386893
ENSMUSG00000115852.3	MGI:6388851	Gm52969	predicted gene, 52969	0.919897	0.00272095	0.00943098	0.799322	0.0131579	0.0554185
ENSMUSG00000115936.2	MGI:1921011	4833415N18Rik	RIKEN cDNA 4833415N18 gene	2.7268	1.2568e-05	8.72463e-05	1.84971	0.00339355	0.0196447
ENSMUSG00000116048.2	MGI:97298	Septin2	septin 2	0.691697	2.83172e-06	2.41828e-05	0.409849	0.00569328	0.0294475
ENSMUSG00000116347.2	MGI:6155046	Gm49416	predicted gene, 49416	0.620712	1.59737e-06	1.47723e-05	0.357864	0.00829202	0.0390191
ENSMUSG00000116358.2	MGI:6155101	Gm49450	predicted gene, 49450	0.737713	2.32684e-08	3.88563e-07	0.381746	0.00386194	0.0217639
ENSMUSG00000116557.2	MGI:1914029	4933432I09Rik	RIKEN cDNA 4933432I09 gene	1.24511	7.49483e-05	0.000415355	0.939245	0.00286948	0.0174029
ENSMUSG00000116657.2	MGI:6215288	Gm49774	predicted gene, 49774	3.34379	0.000778414	0.00318379	0.526052	0.582532
ENSMUSG00000116725.2	MGI:5588845	Gm29686	predicted gene, 29686	2.49076	0.000161424	0.000810013	1.71763	0.0113265	0.049527
ENSMUSG00000116755.2	MGI:3588245	6430553K19Rik	RIKEN cDNA 6430553K19 gene	4.32012	0.00105361	0.00414393	1.16276	0.330374	0.534633
ENSMUSG00000116825.2	MGI:3643238	Rps2-ps7	ribosomal protein S2, pseudogene 7	0.722488	0.000489316	0.00214022	0.320296	0.14402	0.308685
ENSMUSG00000116912.2	MGI:3647872	Gm5487	predicted gene 5487	1.26822	1.8215e-05	0.000121315	0.252595	0.427938	0.627741
ENSMUSG00000116940.2	MGI:3647897	Gm7450	predicted gene 7450	2.97286	1.19269e-05	8.35126e-05	0.71909	0.237353	0.431761
ENSMUSG00000117110.2	MGI:6270474	Gm49808	predicted gene, 49808	5.82882	0.00236297	0.00837221	2.43816	0.229503
ENSMUSG00000117165.2	MGI:6270499	Gm49832	predicted gene, 49832	0.597816	0.000195081	0.000956909	-0.0572227	0.728766	0.849075
ENSMUSG00000117315.2	MGI:1920502	1600022D10Rik	RIKEN cDNA 1600022D10 gene	3.11803	0.00238505	0.00843301	2.6411	0.00277576	0.0169471
ENSMUSG00000117438.2	MGI:3643805	Rpsa-ps7	ribosomal protein SA, pseudogene 7	0.680224	6.16545e-08	9.01155e-07	0.231078	0.0690713	0.185021
ENSMUSG00000117570.2	MGI:5621295	Gm38410	predicted gene, 38410	6.26546	3.62847e-06	2.98909e-05	-0.139857	0.933998	0.968607
ENSMUSG00000117840.2	MGI:6303309	Gm50399	predicted gene, 50399	3.74154	1.16382e-05	8.17505e-05	2.34594	0.00760474	0.0365286
ENSMUSG00000117975.2	MGI:3042776	Itprip	inositol 1,4,5-triphosphate receptor interacting protein	3.50758	3.25493e-13	2.83334e-11	1.06925	0.0274915	0.0953439
ENSMUSG00000118080.2	MGI:5624578	Gm41693	predicted gene, 41693	2.74594	0.00261578	0.00912528	2.76872	0.0166511	0.0661703
ENSMUSG00000118106.2				0.986666	0.000827718	0.00335988	0.529297	0.0785243	0.201839
ENSMUSG00000118161.2	MGI:3779592	Rps2-ps8	ribosomal protein S2, pseudogene 8	0.836736	3.13547e-08	5.03955e-07	0.431516	0.00514256	0.0272558
ENSMUSG00000118171.2	MGI:6303294	Gm50390	predicted gene, 50390	0.869879	0.00129845	0.00496493	0.783542	0.00524227	0.0276259
ENSMUSG00000118229.2	MGI:3045386	Lncbate10	brown adipose tissue enriched long noncoding RNA 10	3.40909	0.000829565	0.00336539	0.0707115	0.947385	0.975428
ENSMUSG00000118243.2	MGI:6302985	Gm50203	predicted gene, 50203	3.5979	3.04e-05	0.000189232	-0.418035	0.679978	0.819539
ENSMUSG00000118330.2	MGI:5589201	Gm30042	predicted gene, 30042	3.06682	0.000155182	0.000781754	2.16337	0.0346233	0.112712
ENSMUSG00000118346.2	MGI:1914956	Tmem179b	transmembrane protein 179B	1.10508	2.6201e-06	2.26635e-05	0.711113	0.00320292	0.0188729
ENSMUSG00000118364.2				2.02802	1.72538e-05	0.000115757	0.1818	0.714137	0.840843
ENSMUSG00000118505.2	MGI:3646099	Etv3l	ets variant 3-like	2.49752	2.97329e-05	0.000185585	0.663158	0.267715	0.466998
ENSMUSG00000118552.2	MGI:3826366	Rplp2-ps1	ribosomal protein, large P2, pseudogene 1	0.756221	2.5033e-05	0.000160001	0.189011	0.31064	0.51451
ENSMUSG00000118618.2	MGI:6388829	Gm52950	predicted gene, 52950	3.69098	0.000873716	0.00351951	1.77432	0.0548386	0.156837
ENSMUSG00000119232.1	MGI:3629654	Mir692-2	microRNA 692-2	1.80435	4.10217e-07	4.5392e-06	0.416798	0.264632	0.46367
ENSMUSG00002074878.1				1.97166	1.5481e-08	2.73864e-07	0.901141	0.013813	0.0575027
ENSMUSG00002075122.1				1.61105	0.000624825	0.0026423	0.910096	0.075589	0.19682
ENSMUSG00002075680.1				1.97908	7.06654e-05	0.000395761	1.03382	0.0647073	0.176195
ENSMUSG00002076377.1				1.9745	1.00295e-05	7.20674e-05	0.912352	0.0568135	0.160806
ENSMUSG00002076852.1				1.55969	0.00078107	0.00319322	1.19404	0.0157684	0.063584
ENSMUSG00002076916.1				1.20582	0.00178848	0.00657109	0.438765	0.262245	0.46109

## Sheet: EZ_3DN
gene	MGI_ID	GeneSymbol	Description	EZ_3_log2FoldChange	EZ_3_pvalue	EZ_3_padj	PIZ_3_log2FoldChange	PIZ_3_pvalue	PIZ_3_padj
ENSMUSG00000000056.8	MGI:1914858	Narf	nuclear prelamin A recognition factor	-0.791182	1.14149e-11	5.7012e-10	-0.136797	0.237006	0.431459
ENSMUSG00000000184.13	MGI:88314	Ccnd2	cyclin D2	-0.651463	0.00131283	0.00501013	-0.404108	0.0460765	0.13804
ENSMUSG00000000197.9	MGI:2444306	Nalcn	sodium leak channel, non-selective	-0.594175	0.00114482	0.00445892	-0.403765	0.0268868	0.0937877
ENSMUSG00000000223.14	MGI:107432	Drp2	dystrophin related protein 2	-0.986372	2.26673e-07	2.74652e-06	-0.359914	0.0581801	0.163573
ENSMUSG00000000402.3	MGI:1858599	Egfl6	EGF-like-domain, multiple 6	-1.11349	0.000446927	0.00197593	-0.80905	0.00927289	0.0425195
ENSMUSG00000000560.10	MGI:95614	Gabra2	gamma-aminobutyric acid (GABA) A receptor, subunit alpha 2	-0.837947	3.14884e-05	0.000194857	-0.387185	0.0540781	0.155049
ENSMUSG00000000739.15	MGI:1931463	Sult5a1	sulfotransferase family 5A, member 1	-1.69331	0.000893526	0.00358672	-0.773447	0.0929748	0.227432
ENSMUSG00000000766.19	MGI:97441	Oprm1	opioid receptor, mu 1	-2.82215	0.000324895	0.00149348	-0.74288	0.210079	0.397681
ENSMUSG00000000861.16	MGI:106190	Bcl11a	B cell CLL/lymphoma 11A (zinc finger protein)	-1.09664	1.86156e-05	0.000123498	-0.256817	0.315347	0.518829
ENSMUSG00000001103.8	MGI:108012	Sebox	SEBOX homeobox	-2.87713	5.9267e-10	1.63656e-08	-1.03475	0.0191049	0.0735
ENSMUSG00000001175.17	MGI:88251	Calm1	calmodulin 1	-0.647191	2.03153e-05	0.000133297	-0.385911	0.011049	0.0486382
ENSMUSG00000001227.13	MGI:1202889	Sema6b	sema domain, transmembrane domain (TM), and cytoplasmic domain, (semaphorin) 6B	-0.601575	0.000292385	0.00136208	-0.129048	0.436138	0.634466
ENSMUSG00000001334.10	MGI:1917614	Fndc5	fibronectin type III domain containing 5	-1.56475	2.62451e-11	1.14229e-09	-0.692247	0.00309664	0.0184182
ENSMUSG00000001763.15	MGI:1919012	Tspan33	tetraspanin 33	-0.643306	0.00124133	0.00477984	-0.622653	0.00173861	0.0117774
ENSMUSG00000001988.10	MGI:109205	Npas1	neuronal PAS domain protein 1	-1.17836	3.48044e-06	2.88534e-05	0.0210146	0.932005	0.967416
ENSMUSG00000002006.13	MGI:2443483	Pdzd4	PDZ domain containing 4	-0.76035	6.62811e-07	6.92354e-06	-0.339598	0.0260145	0.0915419
ENSMUSG00000002222.15	MGI:1915727	Rmnd5a	required for meiotic nuclear division 5 homolog A	-0.596091	5.09362e-05	0.000296785	-0.116812	0.426903	0.626831
ENSMUSG00000002266.18	MGI:1341879	Zim1	zinc finger, imprinted 1	-0.650996	0.000107177	0.000565154	-0.127195	0.440079	0.637955
ENSMUSG00000002633.5	MGI:98297	Shh	sonic hedgehog	-1.82442	0.000467706	0.00205587	0.55965	0.151359	0.319949
ENSMUSG00000002771.13	MGI:95823	Grin2d	glutamate receptor, ionotropic, NMDA2D (epsilon 4)	-1.16346	1.32115e-05	9.12725e-05	-0.275643	0.290357	0.493215
ENSMUSG00000003273.15	MGI:1336193	Car11	carbonic anhydrase 11	-1.08342	1.05222e-05	7.50175e-05	-0.280219	0.253812	0.451124
ENSMUSG00000003279.18	MGI:1346065	Dlgap1	DLG associated protein 1	-1.22876	3.77996e-06	3.09762e-05	-0.622544	0.0191452	0.0736131
ENSMUSG00000003411.11	MGI:1917158	Rab3b	RAB3B, member RAS oncogene family	-1.62846	2.97514e-12	1.82911e-10	-0.482362	0.0351066	0.113869
ENSMUSG00000003418.12	MGI:2386797	St8sia6	ST8 alpha-N-acetyl-neuraminide alpha-2,8-sialyltransferase 6	-1.94584	2.15055e-10	6.8014e-09	-0.479199	0.112203	0.259174
ENSMUSG00000003452.16	MGI:1101760	Bicd1	BICD cargo adaptor 1	-0.727323	1.10308e-05	7.79953e-05	-0.31476	0.0562016	0.159578
ENSMUSG00000003469.10	MGI:1860417	Phyhip	phytanoyl-CoA hydroxylase interacting protein	-1.15296	0.000252221	0.00119508	-0.270073	0.391198	0.593587
ENSMUSG00000003573.16	MGI:1347359	Homer3	homer scaffolding protein 3	-1.24166	9.85231e-06	7.10361e-05	-0.051265	0.85483	0.924772
ENSMUSG00000003575.14	MGI:2142523	Crtc1	CREB regulated transcription coactivator 1	-0.898261	0.000692362	0.00288082	0.0315757	0.905047	0.953149
ENSMUSG00000003863.19	MGI:1924037	Ppfia3	protein tyrosine phosphatase, receptor type, f polypeptide (PTPRF), interacting protein (liprin), alpha 3	-0.700309	3.40989e-06	2.83503e-05	-0.173606	0.248925	0.445891
ENSMUSG00000003872.10	MGI:1330858	Lin7b	lin-7 homolog B (C. elegans)	-1.17794	8.09328e-07	8.19489e-06	-0.12096	0.61067	0.769975
ENSMUSG00000003929.12	MGI:1890752	Zfp81	zinc finger protein 81	-0.625397	5.46719e-05	0.000316	-0.215326	0.163955	0.337174
ENSMUSG00000004031.14	MGI:2443333	Brinp2	bone morphogenic protein/retinoic acid inducible neural-specific 2	-1.9976	1.17474e-08	2.15173e-07	-0.682679	0.0505102	0.147476
ENSMUSG00000004071.14	MGI:1913876	Cdip1	cell death inducing Trp53 target 1	-0.922424	2.73743e-12	1.70205e-10	-0.408388	0.00194177	0.0128107
ENSMUSG00000004110.18	MGI:106217	Cacna1e	calcium channel, voltage-dependent, R type, alpha 1E subunit	-1.1194	0.00178991	0.00657418	-0.246637	0.491339	0.681294
ENSMUSG00000004187.12	MGI:109187	Kifc2	kinesin family member C2	-1.54708	2.68766e-10	8.31779e-09	-0.625129	0.0106651	0.0472799
ENSMUSG00000004267.17	MGI:95394	Eno2	enolase 2, gamma neuronal	-0.641534	0.00051101	0.00222199	-0.0474414	0.797152	0.892561
ENSMUSG00000004366.5	MGI:98326	Sst	somatostatin	-3.327	3.62544e-07	4.08924e-06	-0.86378	0.184509	0.364905
ENSMUSG00000004558.16	MGI:1352498	Ndrg2	N-myc downstream regulated gene 2	-0.635905	4.39781e-06	3.53864e-05	-0.318679	0.0213608	0.079656
ENSMUSG00000004936.9	MGI:1346866	Map2k1	mitogen-activated protein kinase kinase 1	-0.596021	0.0013111	0.00500561	-0.197234	0.2875	0.489747
ENSMUSG00000005089.16	MGI:101931	Slc1a2	solute carrier family 1 (glial high affinity glutamate transporter), member 2	-0.961978	2.85774e-13	2.54413e-11	-0.351147	0.00769398	0.0368333
ENSMUSG00000005362.15	MGI:1913277	Crbn	cereblon	-0.724382	1.7213e-11	8.01682e-10	-0.302248	0.0047469	0.0255646
ENSMUSG00000005580.12	MGI:108450	Adcy9	adenylate cyclase 9	-1.24149	3.47591e-08	5.50921e-07	-0.521446	0.0203161	0.0767232
ENSMUSG00000005716.17	MGI:97821	Pvalb	parvalbumin	-2.88962	6.26163e-14	7.0656e-12	-0.490289	0.189735	0.371239
ENSMUSG00000006218.5	MGI:2685539	Fam131c	family with sequence similarity 131, member C	-2.2805	1.11826e-05	7.89665e-05	-0.0603038	0.886727	0.943523
ENSMUSG00000006235.7	MGI:95408	Epor	erythropoietin receptor	-1.35443	6.33322e-05	0.000359613	0.0575717	0.863086	0.92976
ENSMUSG00000006476.20	MGI:1861755	Nsmf	NMDA receptor synaptonuclear signaling and neuronal migration factor	-0.590934	0.000107218	0.000565154	-0.289725	0.0575153	0.162196
ENSMUSG00000006586.16	MGI:104793	Runx1t1	RUNX1 translocation partner 1	-2.85902	1.02769e-10	3.64072e-09	-0.785012	0.0687756	0.184535
ENSMUSG00000006641.13	MGI:2660847	Slc5a6	solute carrier family 5 (sodium-dependent vitamin transporter), member 6	-0.65588	6.16119e-09	1.22331e-07	-0.26581	0.0150917	0.0614324
ENSMUSG00000006711.16	MGI:3036268	D130043K22Rik	RIKEN cDNA D130043K22 gene	-0.858109	0.00249826	0.00878236	0.0236014	0.933536	0.968378
ENSMUSG00000006920.15	MGI:1097695	Ezh1	enhancer of zeste 1 polycomb repressive complex 2 subunit	-1.0285	2.19398e-07	2.6773e-06	-0.173511	0.381053	0.583274
ENSMUSG00000007207.11	MGI:109355	Stx1a	syntaxin 1A (brain)	-1.27989	9.57727e-12	5.0212e-10	-0.500458	0.00735101	0.0355728
ENSMUSG00000007279.15	MGI:1928765	Scube2	signal peptide, CUB domain, EGF-like 2	-1.48503	0.00070619	0.00293096	0.424462	0.309232	0.512812
ENSMUSG00000007440.11	MGI:1298408	Pcdha10	protocadherin alpha 10	-0.699531	4.65581e-05	0.000273777	-0.343417	0.0453058	0.136449
ENSMUSG00000007594.11	MGI:2679531	Hapln4	hyaluronan and proteoglycan link protein 4	-2.38453	1.69373e-09	4.03143e-08	-0.350749	0.373899	0.577136
ENSMUSG00000007653.13	MGI:95620	Gabrb2	gamma-aminobutyric acid (GABA) A receptor, subunit beta 2	-0.788425	0.00130617	0.0049882	-0.015463	0.949678	0.976444
ENSMUSG00000007888.16	MGI:1340030	Crlf1	cytokine receptor-like factor 1	-1.37342	0.00114415	0.00445698	-0.0607483	0.88548	0.942815
ENSMUSG00000007950.10	MGI:1918946	Abhd8	abhydrolase domain containing 8	-0.772655	0.000697113	0.00289838	-0.0287249	0.899597	0.950551
ENSMUSG00000008307.12	MGI:1924286	1700109H08Rik	RIKEN cDNA 1700109H08 gene	-0.90113	1.09461e-05	7.7496e-05	-0.411733	0.0415247	0.128431
ENSMUSG00000008489.19	MGI:1100887	Elavl2	ELAV like RNA binding protein 1	-2.35837	1.4713e-12	1.00356e-10	-0.751333	0.0232673	0.0845608
ENSMUSG00000009075.3	MGI:2183437	Cabp7	calcium binding protein 7	-0.921135	0.000191541	0.000941735	0.09995	0.685558	0.823089
ENSMUSG00000009207.16	MGI:1918115	Lnpk	lunapark, ER junction formation factor	-0.793262	3.87503e-06	3.16701e-05	-0.51059	0.00279154	0.0170161
ENSMUSG00000009394.14	MGI:103020	Syn2	synapsin II	-1.30001	0.000218657	0.00105705	-0.216306	0.53844	0.717552
ENSMUSG00000009406.14	MGI:101833	Elk1	ELK1, member of ETS oncogene family	-0.96122	0.00282381	0.00973947	0.143335	0.655892	0.802417
ENSMUSG00000009551.3	MGI:1917980	6330409D20Rik	RIKEN cDNA 6330409D20 gene	-2.02341	5.72982e-05	0.000328823	-1.26992	0.00556454	0.028931
ENSMUSG00000009569.15	MGI:3050795	Mrtfb	myocardin related transcription factor B	-0.736519	0.000940057	0.00374874	-0.244973	0.271202	0.470833
ENSMUSG00000009681.11	MGI:88141	Bcr	BCR activator of RhoGEF and GTPase	-0.638504	0.000161995	0.000812347	-0.260711	0.123148	0.276407
ENSMUSG00000009734.19	MGI:2443631	Pou6f2	POU domain, class 6, transcription factor 2	-1.78197	0.000525016	0.00227568	-0.0398527	0.93542	0.969288
ENSMUSG00000010154.8	MGI:2446256	Spire2	spire type actin nucleation factor 2	-1.09159	5.06359e-08	7.62878e-07	-0.370629	0.0566487	0.160487
ENSMUSG00000010592.10	MGI:1342328	Dazl	deleted in azoospermia-like	-1.17909	2.59675e-06	2.2504e-05	-0.667336	0.00517251	0.0273783
ENSMUSG00000011034.7	MGI:107678	Slc5a1	solute carrier family 5 (sodium/glucose cotransporter), member 1	-2.26762	0.000528862	0.00228945	-1.69146	0.0101718	0.0455807
ENSMUSG00000011877.14	MGI:1927140	Git1	GIT ArfGAP 1	-0.952214	2.3572e-05	0.000152332	-0.141554	0.52957	0.710851
ENSMUSG00000012819.17	MGI:1890219	Cdh23	cadherin 23 (otocadherin)	-1.05296	0.000220254	0.0010632	0.300083	0.285715	0.487799
ENSMUSG00000014164.16	MGI:2445185	Klhl3	kelch-like 3	-0.934052	2.0313e-06	1.81842e-05	-0.469964	0.0165883	0.0659829
ENSMUSG00000014592.22	MGI:2140230	Camta1	calmodulin binding transcription activator 1	-0.938343	0.000198459	0.000971293	-0.244796	0.331543	0.535624
ENSMUSG00000015087.15	MGI:2442633	Rabl6	RAB, member RAS oncogene family-like 6	-0.632454	5.70261e-10	1.58586e-08	-0.239209	0.0188623	0.072788
ENSMUSG00000015224.11	MGI:1921769	Cyp2j9	cytochrome P450, family 2, subfamily j, polypeptide 9	-0.879032	1.61961e-09	3.87859e-08	-0.363934	0.0120102	0.051782
ENSMUSG00000015342.7	MGI:103569	Xk	X-linked Kx blood group	-0.920882	4.60265e-08	6.99971e-07	-0.485178	0.00375744	0.0213149
ENSMUSG00000015476.7	MGI:1932118	Prrt1	proline-rich transmembrane protein 1	-0.779032	4.65065e-05	0.000273532	-0.567704	0.0029873	0.0179171
ENSMUSG00000015879.9	MGI:2442958	Fam184b	family with sequence similarity 184, member B	-0.665812	0.000219882	0.00106185	-0.434575	0.0156557	0.0632674
ENSMUSG00000016200.15	MGI:2444490	Syt14	synaptotagmin XIV	-0.74979	0.000296284	0.00137907	-0.280157	0.17534	0.353164
ENSMUSG00000016262.15	MGI:2443496	Sertad4	SERTA domain containing 4	-1.03577	0.00108284	0.00424163	-0.200775	0.526329	0.708085
ENSMUSG00000016346.18	MGI:1309503	Kcnq2	potassium voltage-gated channel, subfamily Q, member 2	-1.09273	8.23925e-07	8.32731e-06	-0.1829	0.409108	0.610891
ENSMUSG00000016386.16	MGI:1924265	Mpped2	metallophosphoesterase domain containing 2	-0.925242	0.000323336	0.00148699	-0.150442	0.558214	0.733018
ENSMUSG00000016552.14	MGI:106315	Foxred2	FAD-dependent oxidoreductase domain containing 2	-0.708639	0.00267962	0.00931244	-0.201068	0.394427	0.596979
ENSMUSG00000016763.16	MGI:1890616	Scube1	signal peptide, CUB domain, EGF-like 1	-1.57581	0.000319515	0.00147244	0.59026	0.17386	0.351388
ENSMUSG00000017167.7	MGI:1858201	Cntnap1	contactin associated protein-like 1	-1.19499	3.35202e-07	3.82882e-06	-0.572614	0.0144122	0.0592658
ENSMUSG00000017390.16	MGI:101863	Aldoc	aldolase C, fructose-bisphosphate	-0.947898	2.11437e-13	1.95865e-11	-0.355108	0.00593142	0.0303851
ENSMUSG00000017400.11	MGI:2144518	Stac2	SH3 and cysteine rich domain 2	-1.05999	5.84747e-09	1.16694e-07	-0.0704219	0.697468	0.82978
ENSMUSG00000017412.16	MGI:103301	Cacnb4	calcium channel, voltage-dependent, beta 4 subunit	-0.874851	1.2823e-07	1.68798e-06	-0.444539	0.00724068	0.0351663
ENSMUSG00000017493.13	MGI:96439	Igfbp4	insulin-like growth factor binding protein 4	-1.01895	0.000498603	0.00217702	-0.370737	0.204751	0.391228
ENSMUSG00000017740.18	MGI:1862037	Slc12a5	solute carrier family 12, member 5	-0.713359	0.000168343	0.000841101	-0.554674	0.00343607	0.019824
ENSMUSG00000017978.19	MGI:2443963	Cadps2	Ca2+-dependent activator protein for secretion 2	-1.88745	2.75627e-08	4.50936e-07	-1.02772	0.00240538	0.0151699
ENSMUSG00000018322.11	MGI:1914395	Tomm34	translocase of outer mitochondrial membrane 34	-0.982963	1.09483e-12	7.90005e-11	-0.347587	0.0114797	0.0500213
ENSMUSG00000018334.19	MGI:105051	Ksr1	kinase suppressor of ras 1	-0.82075	0.00121555	0.00469406	-0.392314	0.121894	0.274285
ENSMUSG00000018411.18	MGI:97180	Mapt	microtubule-associated protein tau	-0.628423	2.63487e-12	1.64438e-10	-0.209536	0.0194704	0.0744786
ENSMUSG00000018415.15	MGI:1914021	Gid4	GID complex subunit 4, VID24 homolog	-0.890739	2.19766e-08	3.70147e-07	-0.378002	0.0173544	0.0683627
ENSMUSG00000018470.9	MGI:1336208	Kcnab3	potassium voltage-gated channel, shaker-related subfamily, beta member 3	-0.939573	0.000493014	0.00215571	-0.452696	0.0908836	0.224096
ENSMUSG00000018474.19	MGI:1344395	Chd3	chromodomain helicase DNA binding protein 3	-0.840833	5.32895e-05	0.000308791	-0.469065	0.0241664	0.0869086
ENSMUSG00000018554.14	MGI:1096372	Ybx2	Y box protein 2	-1.36795	1.50958e-06	1.406e-05	-0.298365	0.273781	0.47383
ENSMUSG00000018965.12	MGI:109194	Ywhah	tyrosine 3-monooxygenase/tryptophan 5-monooxygenase activation protein, eta polypeptide	-0.87225	7.97982e-05	0.000438227	-0.336591	0.127847	0.28352
ENSMUSG00000019082.19	MGI:1915517	Slc25a22	solute carrier family 25 (mitochondrial carrier, glutamate), member 22	-0.708356	7.27386e-05	0.000405797	-0.239679	0.179136	0.358287
ENSMUSG00000019146.3	MGI:1316660	Cacng2	calcium channel, voltage-dependent, gamma subunit 2	-1.16598	4.24977e-11	1.72125e-09	-0.287203	0.102512	0.243382
ENSMUSG00000019194.16	MGI:98247	Scn1b	sodium channel, voltage-gated, type I, beta	-0.788794	9.579e-08	1.31657e-06	-0.0012967	0.992997	0.996927
ENSMUSG00000019230.15	MGI:1316721	Lhx9	LIM homeobox protein 9	-1.34192	0.00120149	0.00464602	-0.881705	0.0322639	0.107135
ENSMUSG00000019232.15	MGI:1919010	Etnppl	ethanolamine phosphate phospholyase	-2.13144	4.04355e-07	4.48339e-06	-0.771905	0.0648409	0.176479
ENSMUSG00000019235.10	MGI:2443413	Rps6kl1	ribosomal protein S6 kinase-like 1	-0.922327	3.83136e-08	5.97928e-07	-0.185314	0.266682	0.465769
ENSMUSG00000019368.14	MGI:2144095	Sec14l4	SEC14-like lipid binding 4	-2.67664	0.000939183	0.00374635	-0.8406	0.234684	0.428661
ENSMUSG00000019370.11	MGI:103249	Calm3	calmodulin 3	-0.929714	3.41275e-08	5.42479e-07	-0.293863	0.0810436	0.206395
ENSMUSG00000019467.16	MGI:1277173	Arhgef25	Rho guanine nucleotide exchange factor (GEF) 25	-0.735722	0.00218903	0.00782877	-0.157927	0.51076	0.696098
ENSMUSG00000019699.17	MGI:1345147	Akt3	thymoma viral proto-oncogene 3	-0.918082	2.1807e-08	3.67554e-07	-0.503252	0.00213671	0.0137791
ENSMUSG00000019762.5	MGI:1917587	Iyd	iodotyrosine deiodinase	-3.57264	5.62525e-07	5.98078e-06	-0.233175	0.738345	0.854542
ENSMUSG00000019772.6	MGI:98933	Vip	vasoactive intestinal polypeptide	-1.82907	3.02292e-06	2.55908e-05	-0.507103	0.182263	0.36204
ENSMUSG00000019831.15	MGI:1890563	Wasf1	WASP family, member 1	-1.4731	5.86226e-06	4.54663e-05	-0.608742	0.0610554	0.169086
ENSMUSG00000019852.8	MGI:106387	Arfgef3	ARFGEF family member 3	-0.66511	0.000907737	0.00363732	-0.482264	0.0161164	0.0646675
ENSMUSG00000019888.17	MGI:1914819	Mgat4c	MGAT4 family, member C	-2.48227	2.64151e-09	5.97609e-08	-0.663736	0.098607	0.237019
ENSMUSG00000019892.14	MGI:1922228	Lrriq1	leucine-rich repeats and IQ motif containing 1	-0.698958	0.00262919	0.00916039	-0.561841	0.0120891	0.052029
ENSMUSG00000019935.17	MGI:3039629	Slc17a8	solute carrier family 17 (sodium-dependent inorganic phosphate cotransporter), member 8	-3.4464	9.14553e-13	6.83298e-11	-0.498659	0.26504	0.464031
ENSMUSG00000019943.11	MGI:104653	Atp2b1	ATPase, Ca++ transporting, plasma membrane 1	-1.32045	5.09025e-08	7.66053e-07	-0.46035	0.0574736	0.162183
ENSMUSG00000019996.18	MGI:1328328	Map7	microtubule-associated protein 7	-1.12882	2.42485e-11	1.06553e-09	-0.375539	0.0258429	0.0911114
ENSMUSG00000020015.11	MGI:97517	Cdk17	cyclin-dependent kinase 17	-0.613501	6.2431e-05	0.00035501	-0.364391	0.0173689	0.0683748
ENSMUSG00000020061.19	MGI:1336213	Mybpc1	myosin binding protein C, slow-type	-2.39384	0.000577933	0.00247029	-1.0877	0.0434081	0.132635
ENSMUSG00000020090.8	MGI:2685082	Npffr1	neuropeptide FF receptor 1	-1.7401	0.00103261	0.00406795	-0.46028	0.366036	0.569239
ENSMUSG00000020096.22	MGI:1923820	Tbata	thymus, brain and testes associated	-3.38636	4.9487e-10	1.3989e-08	-1.1431	0.0292145	0.0997226
ENSMUSG00000020218.12	MGI:1344332	Wif1	Wnt inhibitory factor 1	-1.50469	0.000487628	0.00213318	-0.160703	0.669115	0.811573
ENSMUSG00000020263.15	MGI:2384914	Appl2	adaptor protein, phosphotyrosine interaction, PH domain and leucine zipper containing 2	-0.803033	4.49024e-08	6.85537e-07	-0.456565	0.00185034	0.0123601
ENSMUSG00000020297.11	MGI:1202070	Nsg2	neuron specific gene family member 2	-0.775728	0.000924754	0.00369363	-0.489529	0.0365491	0.117376
ENSMUSG00000020340.17	MGI:1924134	Cyfip2	cytoplasmic FMR1 interacting protein 2	-1.15696	1.20791e-09	3.042e-08	-0.357562	0.0602058	0.167389
ENSMUSG00000020396.9	MGI:97309	Nefh	neurofilament, heavy polypeptide	-1.36641	4.96841e-06	3.93626e-05	-0.155895	0.599408	0.762416
ENSMUSG00000020435.18	MGI:1921559	Osbp2	oxysterol binding protein 2	-0.672708	0.000271521	0.00127528	-0.306232	0.0972992	0.234974
ENSMUSG00000020447.6	MGI:2685089	Npc1l1	NPC1 like intracellular cholesterol transporter 1	-2.06886	7.48393e-06	5.60681e-05	-0.262602	0.544663	0.721963
ENSMUSG00000020524.17	MGI:95808	Gria1	glutamate receptor, ionotropic, AMPA1 (alpha 1)	-1.24501	2.23038e-05	0.000145025	-0.68513	0.0196088	0.0748398
ENSMUSG00000020591.12	MGI:108018	Ntsr2	neurotensin receptor 2	-1.47823	4.56391e-23	8.34282e-20	-0.397647	0.00752007	0.0362014
ENSMUSG00000020620.15	MGI:1351668	Abca8b	ATP-binding cassette, sub-family A (ABC1), member 8b	-0.793412	0.00218613	0.00782117	0.165726	0.521145	0.704263
ENSMUSG00000020635.9	MGI:1336205	Fkbp1b	FK506 binding protein 1b	-1.43113	1.28915e-09	3.19606e-08	-0.586153	0.0113213	0.0495133
ENSMUSG00000020639.15	MGI:1920121	Pfn4	profilin family, member 4	-0.608138	0.000138504	0.000707879	-0.396869	0.0108728	0.0480411
ENSMUSG00000020647.11	MGI:1276523	Ncoa1	nuclear receptor coactivator 1	-0.890515	1.19918e-08	2.19065e-07	-0.38814	0.0128914	0.0545636
ENSMUSG00000020656.17	MGI:2182540	Grhl1	grainyhead like transcription factor 1	-0.593351	0.00211294	0.00758932	-0.228172	0.235664	0.429961
ENSMUSG00000020668.11	MGI:107979	Kif3c	kinesin family member 3C	-0.616946	7.80376e-06	5.82256e-05	-0.253272	0.0662204	0.17928
ENSMUSG00000020704.14	MGI:1100867	Asic2	acid-sensing (proton-gated) ion channel 2	-1.50729	2.19499e-06	1.94716e-05	-0.8065	0.0110775	0.048722
ENSMUSG00000020774.10	MGI:87914	Aspa	aspartoacylase	-1.06989	0.000136436	0.000698105	-0.469782	0.0907804	0.223933
ENSMUSG00000020785.18	MGI:1891766	Camkk1	calcium/calmodulin-dependent protein kinase kinase 1, alpha	-1.20741	0.000121066	0.000627884	-0.16205	0.605823	0.76692
ENSMUSG00000020810.6	MGI:2149481	Cygb	cytoglobin	-1.51661	0.000313418	0.00144727	-0.474221	0.259046	0.457921
ENSMUSG00000020836.16	MGI:2183448	Coro6	coronin 6	-2.16012	4.40074e-09	9.14846e-08	-0.667683	0.0590572	0.165323
ENSMUSG00000020847.16	MGI:1923492	Rph3al	rabphilin 3A-like (without C2 domains)	-1.56169	0.00046385	0.00204153	0.0140658	0.974604	0.988835
ENSMUSG00000020848.8	MGI:1100497	Doc2b	double C2, beta	-2.23084	4.58532e-08	6.98109e-07	-0.818516	0.0447257	0.13532
ENSMUSG00000020882.18	MGI:102522	Cacnb1	calcium channel, voltage-dependent, beta 1 subunit	-0.604977	0.00229747	0.0081697	-0.128546	0.516702	0.700741
ENSMUSG00000020886.18	MGI:1277959	Dlg4	discs large MAGUK scaffold protein 4	-0.68277	7.94206e-06	5.90564e-05	-0.275901	0.0710407	0.188551
ENSMUSG00000020891.12	MGI:1098228	Alox8	arachidonate 8-lipoxygenase	-1.34017	7.73828e-10	2.05604e-08	-0.536729	0.00939949	0.0429607
ENSMUSG00000020908.15	MGI:1339709	Myh3	myosin, heavy polypeptide 3, skeletal muscle, embryonic	-2.0017	0.000212927	0.00103281	-0.87462	0.0363523	0.117048
ENSMUSG00000020926.17	MGI:1098667	Adam11	a disintegrin and metallopeptidase domain 11	-1.0611	9.14149e-07	9.09835e-06	-0.545772	0.0114775	0.0500213
ENSMUSG00000020936.9	MGI:102579	Nmt1	N-myristoyltransferase 1	-0.645375	5.30613e-06	4.16769e-05	-0.362486	0.0105534	0.0469319
ENSMUSG00000021057.16	MGI:2685104	Akap5	A kinase (PRKA) anchor protein 5	-1.31239	1.07349e-07	1.44502e-06	-0.529196	0.0316047	0.105764
ENSMUSG00000021061.16	MGI:98387	Sptb	spectrin beta, erythrocytic	-0.78098	0.00256508	0.00897695	-0.164748	0.524599	0.706786
ENSMUSG00000021062.16	MGI:1916865	Rab15	RAB15, member RAS oncogene family	-1.16356	9.59427e-08	1.31801e-06	-0.477134	0.0284663	0.0979333
ENSMUSG00000021066.10	MGI:1921241	Atl1	atlastin GTPase 1	-0.979072	1.12007e-06	1.08909e-05	-0.343547	0.086867	0.216951
ENSMUSG00000021087.19	MGI:1933947	Rtn1	reticulon 1	-0.762862	4.14886e-06	3.35778e-05	-0.437088	0.00833161	0.0391594
ENSMUSG00000021098.15	MGI:1923051	4930447C04Rik	RIKEN cDNA 4930447C04 gene	-2.13408	5.18741e-12	2.92672e-10	-0.52843	0.0761676	0.197676
ENSMUSG00000021180.10	MGI:1920336	Rps6ka5	ribosomal protein S6 kinase, polypeptide 5	-1.11309	2.82706e-09	6.28694e-08	-0.422224	0.0228436	0.0834816
ENSMUSG00000021198.17	MGI:2684729	Unc79	unc-79 homolog	-0.607038	0.000272963	0.00128074	-0.251018	0.131856	0.28997
ENSMUSG00000021203.16	MGI:1915399	Otub2	OTU domain, ubiquitin aldehyde binding 2	-0.631369	0.00128114	0.004909	-0.183858	0.347578	0.551341
ENSMUSG00000021214.15	MGI:2145420	Akr1c18	aldo-keto reductase family 1, member C18	-4.44317	3.44036e-07	3.9143e-06	-0.889022	0.206428	0.393242
ENSMUSG00000021221.16	MGI:1917377	Dpf3	D4, zinc and double PHD fingers, family 3	-1.08702	0.000498727	0.00217722	0.363651	0.242306	0.437826
ENSMUSG00000021259.6	MGI:1341877	Cyp46a1	cytochrome P450, family 46, subfamily a, polypeptide 1	-0.931918	2.51883e-06	2.19049e-05	-0.194751	0.32445	0.528426
ENSMUSG00000021265.4	MGI:2444911	Slc25a29	solute carrier family 25 (mitochondrial carrier, palmitoylcarnitine transporter), member 29	-0.813666	7.53753e-07	7.70903e-06	-0.257462	0.111676	0.258382
ENSMUSG00000021268.18	MGI:1202886	Meg3	maternally expressed 3	-0.999237	4.91276e-05	0.000287346	-0.393843	0.109533	0.255062
ENSMUSG00000021313.17	MGI:99685	Ryr2	ryanodine receptor 2, cardiac	-1.13778	0.000965414	0.00383759	-0.0805269	0.815267	0.902761
ENSMUSG00000021314.14	MGI:103574	Amph	amphiphysin	-1.45941	1.76839e-08	3.07869e-07	-0.395077	0.12693	0.282234
ENSMUSG00000021379.3	MGI:99414	Id4	inhibitor of DNA binding 4	-0.995407	3.302e-10	9.94955e-09	-0.265247	0.0936429	0.228653
ENSMUSG00000021395.12	MGI:109242	Spin1	spindlin 1	-0.675767	1.19932e-06	1.1555e-05	-0.346466	0.0126852	0.053926
ENSMUSG00000021476.10	MGI:1891713	Habp4	hyaluronic acid binding protein 4	-0.626426	1.56227e-07	1.9943e-06	-0.350204	0.00330416	0.0192601
ENSMUSG00000021534.9	MGI:1916565	1700001L19Rik	RIKEN cDNA 1700001L19 gene	-1.73395	1.03014e-05	7.35964e-05	-0.843895	0.0219643	0.0811876
ENSMUSG00000021557.16	MGI:2159437	Agtpbp1	ATP/GTP binding protein 1	-0.658094	0.00020596	0.0010031	-0.215009	0.224871	0.415706
ENSMUSG00000021559.15	MGI:1916885	Dapk1	death associated protein kinase 1	-1.02373	2.83191e-06	2.41828e-05	-0.588205	0.00711332	0.0347443
ENSMUSG00000021613.10	MGI:1337006	Hapln1	hyaluronan and proteoglycan link protein 1	-0.833959	1.0105e-08	1.88361e-07	-0.0463337	0.748857	0.861978
ENSMUSG00000021676.11	MGI:2449975	Iqgap2	IQ motif containing GTPase activating protein 2	-1.49852	3.78919e-06	3.10241e-05	-0.597319	0.0651884	0.177268
ENSMUSG00000021700.11	MGI:1914545	Rab3c	RAB3C, member RAS oncogene family	-1.62735	4.32373e-07	4.75713e-06	-0.65613	0.0414398	0.128268
ENSMUSG00000021712.16	MGI:1933161	Trim23	tripartite motif-containing 23	-0.659529	3.1891e-07	3.67263e-06	-0.39088	0.00235958	0.0149398
ENSMUSG00000021719.10	MGI:106334	Rgs7bp	regulator of G-protein signalling 7 binding protein	-0.834844	0.00119494	0.00462852	-0.354888	0.168352	0.343462
ENSMUSG00000021732.15	MGI:1099809	Fgf10	fibroblast growth factor 10	-3.87705	5.43968e-13	4.44756e-11	-1.23822	0.0162291	0.0650057
ENSMUSG00000021743.7	MGI:1859823	Fezf2	Fez family zinc finger 2	-0.849449	0.000258006	0.00121828	-0.295202	0.19856	0.382958
ENSMUSG00000021752.15	MGI:1918643	Kctd6	potassium channel tetramerisation domain containing 6	-0.730559	0.000156538	0.000788007	-0.38167	0.0477721	0.141473
ENSMUSG00000021775.12	MGI:2449205	Nr1d2	nuclear receptor subfamily 1, group D, member 2	-0.814023	7.46242e-05	0.000413791	-0.391674	0.056511	0.160229
ENSMUSG00000021798.15	MGI:1344412	Ldb3	LIM domain binding 3	-0.88236	4.63621e-11	1.864e-09	-0.317756	0.0124586	0.0532662
ENSMUSG00000021816.12	MGI:107163	Ppp3cb	protein phosphatase 3, catalytic subunit, beta isoform	-0.985953	1.86818e-08	3.21971e-07	-0.48399	0.00573903	0.0296395
ENSMUSG00000021892.15	MGI:1344391	Sh3bp5	SH3-domain binding protein 5 (BTK-associated)	-0.696976	4.55398e-05	0.000268711	-0.501623	0.00331383	0.019304
ENSMUSG00000021959.17	MGI:1354386	Lats2	large tumor suppressor 2	-0.960615	5.68415e-06	4.42406e-05	-0.241764	0.2526	0.449988
ENSMUSG00000021983.17	MGI:1354710	Atp8a2	ATPase, aminophospholipid transporter-like, class I, type 8A, member 2	-0.782877	8.30413e-08	1.17069e-06	-0.0671954	0.643023	0.794583
ENSMUSG00000021991.10	MGI:1338890	Cacna2d3	calcium channel, voltage-dependent, alpha2/delta subunit 3	-1.13298	5.94127e-08	8.71641e-07	-0.324033	0.120089	0.271443
ENSMUSG00000022048.9	MGI:1349763	Dpysl2	dihydropyrimidinase-like 2	-0.605962	1.70384e-09	4.04846e-08	-0.0917896	0.358983	0.561832
ENSMUSG00000022099.18	MGI:99670	Dmtn	dematin actin binding protein	-0.735124	0.000319567	0.00147244	-0.101044	0.620758	0.778327
ENSMUSG00000022176.12	MGI:2155260	Rem2	rad and gem related GTP binding protein 2	-1.51155	3.0751e-05	0.000191244	-0.33169	0.355849	0.559218
ENSMUSG00000022208.13	MGI:2443113	Jph4	junctophilin 4	-1.40548	2.75602e-05	0.000173884	-0.54671	0.102814	0.243858
ENSMUSG00000022212.16	MGI:1334445	Cpne6	copine VI	-1.10482	0.000272868	0.00128073	-0.380356	0.210077	0.397681
ENSMUSG00000022219.11	MGI:1270844	Cideb	cell death-inducing DNA fragmentation factor, alpha subunit-like effector B	-0.635438	0.000344432	0.00157405	0.0531723	0.770402	0.875708
ENSMUSG00000022324.16	MGI:109613	Matn2	matrilin 2	-2.05856	4.98841e-08	7.5362e-07	-0.68844	0.0670658	0.181222
ENSMUSG00000022332.9	MGI:1313312	Khdrbs3	KH domain containing, RNA binding, signal transduction associated 3	-1.83228	3.03527e-11	1.27868e-09	-0.621548	0.023776	0.0858485
ENSMUSG00000022340.16	MGI:2442392	Sybu	syntabulin (syntaxin-interacting)	-0.73114	0.000449919	0.0019866	-0.0246674	0.905697	0.953614
ENSMUSG00000022376.9	MGI:1341110	Adcy8	adenylate cyclase 8	-0.701917	0.00227327	0.00810152	-0.593836	0.00928139	0.0425422
ENSMUSG00000022389.16	MGI:98663	Tef	thyrotroph embryonic factor	-1.3707	1.95828e-08	3.35182e-07	-0.48052	0.0489013	0.144038
ENSMUSG00000022419.17	MGI:2146322	Deptor	DEP domain containing MTOR-interacting protein	-0.6511	0.000891719	0.00358203	-0.0356567	0.853948	0.924206
ENSMUSG00000022456.19	MGI:1345148	Septin3	septin 3	-1.00424	2.96145e-07	3.45251e-06	-0.499366	0.0107859	0.0477186
ENSMUSG00000022525.14	MGI:1351473	Plaat1	phospholipase A and acyltransferase 1	-1.04321	6.59155e-06	5.01221e-05	-0.526812	0.0207285	0.0779255
ENSMUSG00000022619.6	MGI:1926555	Mapk8ip2	mitogen-activated protein kinase 8 interacting protein 2	-0.833457	7.41372e-05	0.000411778	-0.280314	0.182381	0.362149
ENSMUSG00000022623.18	MGI:1930016	Shank3	SH3 and multiple ankyrin repeat domains 3	-0.801952	7.52906e-07	7.70324e-06	-0.0620286	0.70169	0.832477
ENSMUSG00000022637.12	MGI:2146430	Cblb	Casitas B-lineage lymphoma b	-1.21017	3.33961e-05	0.000205457	-0.786548	0.00698509	0.0343342
ENSMUSG00000022679.14	MGI:2135951	Mpv17l	Mpv17 transgene, kidney disease mutant-like	-0.616275	5.01964e-06	3.96996e-05	-0.349606	0.00949542	0.0433197
ENSMUSG00000022715.4	MGI:1921970	Tmem114	transmembrane protein 114	-1.67722	3.69373e-05	0.000223729	-0.819758	0.0384847	0.121738
ENSMUSG00000022761.13	MGI:1914113	Lztr1	leucine-zipper-like transcriptional regulator, 1	-0.692344	1.52699e-08	2.70653e-07	-0.202371	0.0976055	0.235438
ENSMUSG00000022763.19	MGI:1919418	Aifm3	apoptosis-inducing factor, mitochondrion-associated 3	-1.71666	1.12376e-05	7.93345e-05	-0.842137	0.0309037	0.103939
ENSMUSG00000022773.20	MGI:1913303	Ypel1	yippee like 1	-0.931981	0.00138487	0.00524417	-0.21959	0.449989	0.646827
ENSMUSG00000022802.3	MGI:2444736	Lmln	leishmanolysin-like (metallopeptidase M8 family)	-0.586264	0.00118886	0.00460757	0.0679398	0.70516	0.83474
ENSMUSG00000022861.18	MGI:105060	Dgkg	diacylglycerol kinase, gamma	-0.807543	0.00277227	0.00958703	-0.285321	0.290007	0.492795
ENSMUSG00000022883.12	MGI:1274781	Robo1	roundabout guidance receptor 1	-2.07079	2.91503e-15	5.12178e-13	-0.63724	0.0145282	0.0595932
ENSMUSG00000022935.17	MGI:95814	Grik1	glutamate receptor, ionotropic, kainate 1	-1.52762	2.20059e-05	0.000143224	-0.543998	0.119987	0.271264
ENSMUSG00000022957.21	MGI:1338069	Itsn1	intersectin 1 (SH3 domain protein 1A)	-0.737483	3.70394e-05	0.000224298	-0.0626255	0.725904	0.847323
ENSMUSG00000022973.19	MGI:1354961	Synj1	synaptojanin 1	-1.0814	3.2581e-08	5.20917e-07	-0.57695	0.00317153	0.0187246
ENSMUSG00000023011.9	MGI:1919643	Faim2	Fas apoptotic inhibitory molecule 2	-1.34694	2.24833e-05	0.000146123	-0.454924	0.152127	0.320955
ENSMUSG00000023032.13	MGI:1928745	Slc4a8	solute carrier family 4 (anion exchanger), member 8	-0.678884	7.12212e-06	5.37245e-05	-0.225517	0.135022	0.294856
ENSMUSG00000023033.15	MGI:103169	Scn8a	sodium channel, voltage-gated, type VIII, alpha	-0.999667	7.50933e-06	5.6243e-05	-0.410862	0.0655784	0.178043
ENSMUSG00000023094.15	MGI:1923717	Msrb2	methionine sulfoxide reductase B2	-0.664244	8.80578e-08	1.22566e-06	-0.255867	0.0371427	0.118743
ENSMUSG00000023353.15	MGI:2183446	Agap3	ArfGAP with GTPase domain, ankyrin repeat and PH domain 3	-0.967876	8.41951e-07	8.47817e-06	-0.267929	0.172313	0.349244
ENSMUSG00000023391.9	MGI:94902	Dlx2	distal-less homeobox 2	-2.50072	1.46944e-05	0.000100129	-0.262144	0.607652	0.767862
ENSMUSG00000023927.16	MGI:105084	Satb1	special AT-rich sequence binding protein 1	-1.0309	5.37654e-14	6.2734e-12	-0.220844	0.104087	0.246078
ENSMUSG00000023949.8	MGI:98640	Tcte1	t-complex-associated testis expressed 1	-3.22297	4.77802e-06	3.8041e-05	-0.571772	0.261917	0.46066
ENSMUSG00000023959.11	MGI:1917912	Clic5	chloride intracellular channel 5	-0.965697	2.34654e-08	3.90425e-07	-0.543067	0.00154893	0.0107435
ENSMUSG00000023960.14	MGI:1933830	Enpp5	ectonucleotide pyrophosphatase/phosphodiesterase 5	-0.599056	9.50844e-07	9.40554e-06	-0.211964	0.0824137	0.208911
ENSMUSG00000023991.17	MGI:1921373	Foxp4	forkhead box P4	-0.85605	0.000799135	0.00325688	-0.107203	0.673136	0.814232
ENSMUSG00000023999.15	MGI:1098238	Kif6	kinesin family member 6	-1.07864	0.00242271	0.00854856	0.089428	0.791031	0.888737
ENSMUSG00000024008.17	MGI:2385908	Cpne5	copine V	-2.11799	3.03581e-11	1.27868e-09	-0.311996	0.319008	0.522574
ENSMUSG00000024027.9	MGI:99571	Glp1r	glucagon-like peptide 1 receptor	-2.79113	0.000100171	0.000533337	-0.84426	0.206054	0.39278
ENSMUSG00000024172.11	MGI:2445190	St6gal2	beta galactoside alpha 2,6 sialyltransferase 2	-1.27533	1.51438e-08	2.69114e-07	-0.705375	0.00151388	0.0105739
ENSMUSG00000024186.16	MGI:1354739	Rgs11	regulator of G-protein signaling 11	-1.46126	4.52589e-09	9.35896e-08	-0.126199	0.609755	0.769446
ENSMUSG00000024227.15	MGI:1916489	Pdzph1	PDZ and pleckstrin homology domains 1	-1.7308	8.55466e-05	0.000466247	0.246725	0.510697	0.696053
ENSMUSG00000024403.17	MGI:1913487	Atp6v1g2	ATPase, H+ transporting, lysosomal V1 subunit G2	-1.07864	3.72736e-08	5.83024e-07	-0.583906	0.00287364	0.0174238
ENSMUSG00000024424.16	MGI:1919997	Ttc39c	tetratricopeptide repeat domain 39C	-0.69487	0.00251574	0.00883359	-0.455939	0.0469572	0.139836
ENSMUSG00000024462.18	MGI:1860139	Gabbr1	gamma-aminobutyric acid (GABA) B receptor, 1	-0.592506	8.3673e-05	0.000457536	-0.145948	0.332452	0.536529
ENSMUSG00000024500.21	MGI:1920180	Ppp2r2b	protein phosphatase 2, regulatory subunit B, beta	-0.914482	1.6954e-06	1.55374e-05	-0.490385	0.00995919	0.0448873
ENSMUSG00000024502.11	MGI:1923467	Jakmip2	janus kinase and microtubule interacting protein 2	-0.587452	5.57859e-06	4.35302e-05	-0.279868	0.0297768	0.100996
ENSMUSG00000024511.16	MGI:1931295	Rab27b	RAB27B, member RAS oncogene family	-1.45534	1.50121e-08	2.67119e-07	-0.791139	0.00197076	0.012977
ENSMUSG00000024617.17	MGI:88256	Camk2a	calcium/calmodulin-dependent protein kinase II alpha	-1.49667	2.05155e-08	3.49185e-07	-0.652955	0.0144247	0.0592894
ENSMUSG00000024743.17	MGI:1859545	Syt7	synaptotagmin VII	-0.91778	0.00040711	0.00182193	-0.129224	0.61861	0.776576
ENSMUSG00000024758.16	MGI:1339970	Rtn3	reticulon 3	-0.757441	3.21178e-08	5.1381e-07	-0.344859	0.0117928	0.0510245
ENSMUSG00000024798.16	MGI:99841	Htr7	5-hydroxytryptamine (serotonin) receptor 7	-1.68315	0.00039115	0.00175825	-0.876898	0.0580359	0.163282
ENSMUSG00000024862.17	MGI:107953	Klc2	kinesin light chain 2	-0.772628	4.02727e-09	8.48791e-08	-0.353536	0.00698435	0.0343342
ENSMUSG00000024873.8	MGI:1277225	Cnih2	cornichon family AMPA receptor auxiliary protein 2	-0.925652	4.57831e-07	4.98757e-06	-0.534731	0.00356614	0.0204176
ENSMUSG00000024901.16	MGI:1924963	Peli3	pellino 3	-0.821949	3.84538e-06	3.14559e-05	-0.178161	0.310924	0.514649
ENSMUSG00000024921.18	MGI:99603	Smarca2	SWI/SNF related, matrix associated, actin dependent regulator of chromatin, subfamily a, member 2	-0.863979	2.33505e-06	2.05083e-05	-0.349703	0.05586	0.159021
ENSMUSG00000024924.15	MGI:98935	Vldlr	very low density lipoprotein receptor	-0.764667	4.01535e-07	4.45572e-06	-0.0643018	0.668889	0.811422
ENSMUSG00000024957.10	MGI:1298234	Kcnk4	potassium channel, subfamily K, member 4	-3.03874	2.92096e-09	6.43314e-08	-0.788295	0.112025	0.25901
ENSMUSG00000024975.14	MGI:107490	Pdcd4	programmed cell death 4	-0.632408	1.41135e-09	3.45219e-08	-0.236658	0.0229567	0.0837611
ENSMUSG00000025020.12	MGI:1315203	Slit1	slit guidance ligand 1	-1.71867	3.82009e-05	0.000230507	-0.860101	0.0392548	0.123508
ENSMUSG00000025092.8	MGI:1920692	Hspa12a	heat shock protein 12A	-1.4986	2.80261e-07	3.29112e-06	-0.579155	0.0469288	0.139804
ENSMUSG00000025104.14	MGI:1352760	Hdgfl3	HDGF like 3	-0.660107	1.24473e-05	8.65816e-05	-0.355195	0.0184604	0.0716756
ENSMUSG00000025128.8	MGI:1930001	Bhlhe22	basic helix-loop-helix family, member e22	-1.30834	1.24014e-05	8.635e-05	-0.913393	0.00227595	0.0145058
ENSMUSG00000025255.19	MGI:2137668	Zfhx4	zinc finger homeodomain 4	-0.988427	0.000510565	0.00222097	-0.353079	0.214181	0.40278
ENSMUSG00000025277.15	MGI:1913332	Abhd6	abhydrolase domain containing 6	-0.602905	3.36406e-10	1.01032e-08	-0.194263	0.0420238	0.12943
ENSMUSG00000025318.14	MGI:1891497	Jph3	junctophilin 3	-0.898048	0.000163048	0.00081643	-0.125911	0.596953	0.761673
ENSMUSG00000025372.17	MGI:2137336	Baiap2	brain-specific angiogenesis inhibitor 1-associated protein 2	-1.02359	0.000337892	0.001547	-0.14215	0.618556	0.776576
ENSMUSG00000025422.11	MGI:3580016	Agap2	ArfGAP with GTPase domain, ankyrin repeat and PH domain 2	-0.879831	2.37942e-06	2.08513e-05	-0.338081	0.0697989	0.18638
ENSMUSG00000025425.19	MGI:109243	St8sia5	ST8 alpha-N-acetyl-neuraminide alpha-2,8-sialyltransferase 5	-1.24877	4.1689e-07	4.60932e-06	-0.157115	0.521041	0.704203
ENSMUSG00000025427.16	MGI:2444521	Rnf165	ring finger protein 165	-0.650516	0.00191319	0.00695937	-0.454372	0.0299856	0.101504
ENSMUSG00000025519.6	MGI:1921669	Tktl2	transketolase-like 2	-2.38054	0.000264393	0.00124479	-1.23348	0.0309144	0.10396
ENSMUSG00000025551.14	MGI:109189	Fgf14	fibroblast growth factor 14	-1.18953	0.000718009	0.0029713	-0.431362	0.218884	0.408255
ENSMUSG00000025586.18	MGI:108442	Cpeb1	cytoplasmic polyadenylation element binding protein 1	-0.949739	0.000106593	0.0005624	-0.0767162	0.753959	0.865117
ENSMUSG00000025656.18	MGI:2442233	Arhgef9	CDC42 guanine nucleotide exchange factor (GEF) 9	-0.830595	8.76268e-05	0.000475976	-0.345695	0.10249	0.243355
ENSMUSG00000025658.17	MGI:2661175	Cnksr2	connector enhancer of kinase suppressor of Ras 2	-1.56173	2.62841e-07	3.12402e-06	-0.440359	0.146398	0.312298
ENSMUSG00000025723.13	MGI:1915289	Nmb	neuromedin B	-1.22985	8.43332e-09	1.60612e-07	-0.238416	0.249795	0.446913
ENSMUSG00000025727.9	MGI:2442713	A930017K11Rik	RIKEN cDNA A930017K11 gene	-2.5068	5.08562e-05	0.000296445	-0.624819	0.151925	0.320698
ENSMUSG00000025735.14	MGI:2384891	Rhbdl1	rhomboid like 1	-0.909621	2.17228e-07	2.65673e-06	-0.151308	0.38604	0.588137
ENSMUSG00000025738.9	MGI:2448488	Fbxl16	F-box and leucine-rich repeat protein 16	-1.1257	6.46545e-07	6.77168e-06	-0.439283	0.0520946	0.150841
ENSMUSG00000025739.14	MGI:1925616	Gng13	guanine nucleotide binding protein (G protein), gamma 13	-1.01525	3.04088e-07	3.53159e-06	-0.425774	0.0262042	0.0920614
ENSMUSG00000025757.14	MGI:107422	Hspa4l	heat shock protein 4 like	-0.914394	1.31909e-08	2.38113e-07	-0.483036	0.0026229	0.0162435
ENSMUSG00000025776.14	MGI:1934666	Crispld1	cysteine-rich secretory protein LCCL domain containing 1	-2.67634	2.16798e-17	6.83429e-15	-0.751627	0.0116513	0.0506069
ENSMUSG00000025777.9	MGI:1338002	Gdap1	ganglioside-induced differentiation-associated-protein 1	-0.769957	4.21044e-05	0.000250924	-0.402317	0.0321412	0.106816
ENSMUSG00000025787.7	MGI:3027002	Tgm4	transglutaminase 4 (prostate)	-1.21683	0.00290684	0.00999019	-0.303106	0.393	0.595458
ENSMUSG00000025813.15	MGI:1347354	Homer2	homer scaffolding protein 2	-1.88173	1.56474e-07	1.99652e-06	-0.82196	0.0217955	0.0807882
ENSMUSG00000025815.14	MGI:2445096	Dhtkd1	dehydrogenase E1 and transketolase domain containing 1	-0.722514	0.000362465	0.0016444	-0.387662	0.0526293	0.15202
ENSMUSG00000025855.14	MGI:97759	Prkar1b	protein kinase, cAMP dependent regulatory, type I beta	-0.59308	0.0004812	0.00210876	-0.165046	0.331095	0.535355
ENSMUSG00000025867.9	MGI:104726	Cplx2	complexin 2	-0.849498	0.000494665	0.00216258	-0.23913	0.326755	0.530886
ENSMUSG00000025889.14	MGI:1277151	Snca	synuclein, alpha	-0.862405	0.0025732	0.00899619	-0.249499	0.382939	0.585446
ENSMUSG00000025909.17	MGI:1918346	Sntg1	syntrophin, gamma 1	-0.814585	0.000963583	0.00383234	-0.429228	0.0809769	0.206268
ENSMUSG00000025933.16	MGI:1922962	Tmem14a	transmembrane protein 14A	-0.675667	1.47579e-07	1.90188e-06	-0.235473	0.0642732	0.175291
ENSMUSG00000026000.17	MGI:1336997	Lancl1	LanC (bacterial lantibiotic synthetase component C)-like 1	-0.968378	7.63843e-10	2.03543e-08	-0.478817	0.00230945	0.0146649
ENSMUSG00000026014.16	MGI:1924550	Raph1	Ras association (RalGDS/AF-6) and pleckstrin homology domains 1	-0.594487	8.41636e-05	0.000459897	-0.287132	0.0561438	0.159451
ENSMUSG00000026062.13	MGI:105075	Slc9a2	solute carrier family 9 (sodium/hydrogen exchanger), member 2	-2.96312	2.47389e-09	5.64813e-08	-0.984312	0.044258	0.13431
ENSMUSG00000026065.9	MGI:105074	Slc9a4	solute carrier family 9 (sodium/hydrogen exchanger), member 4	-2.53687	5.86568e-06	4.54727e-05	-0.96478	0.0790771	0.203
ENSMUSG00000026103.15	MGI:95752	Gls	glutaminase	-0.598156	0.000706231	0.00293096	-0.140497	0.426067	0.626028
ENSMUSG00000026141.14	MGI:1095415	Col19a1	collagen, type XIX, alpha 1	-3.41176	1.10003e-08	2.03116e-07	-0.761113	0.193694	0.376316
ENSMUSG00000026158.12	MGI:1917405	Ogfrl1	opioid growth factor receptor-like 1	-1.34702	2.85909e-10	8.7496e-09	-0.545279	0.0105836	0.0470023
ENSMUSG00000026207.17	MGI:109282	Speg	SPEG complex locus	-0.61753	8.91418e-05	0.000482962	-0.115196	0.464235	0.658524
ENSMUSG00000026235.15	MGI:98277	Epha4	Eph receptor A4	-0.955526	0.000242821	0.00115613	-0.171362	0.510402	0.695808
ENSMUSG00000026344.10	MGI:1919835	Lypd1	Ly6/Plaur domain containing 1	-2.49851	1.18568e-07	1.57887e-06	-1.10345	0.0190516	0.0733805
ENSMUSG00000026354.9	MGI:104576	Lct	lactase	-2.03611	0.00251062	0.00881789	-1.07934	0.109117	0.254465
ENSMUSG00000026399.13	MGI:104850	Cd55	CD55 molecule, decay accelerating factor for complement	-1.46449	6.65842e-07	6.94461e-06	-0.526669	0.0553273	0.157784
ENSMUSG00000026405.15	MGI:88229	C4bp	complement component 4 binding protein	-3.29457	0.000257629	0.00121719	-1.00697	0.0841597	0.21204
ENSMUSG00000026443.4	MGI:106037	Lrrn2	leucine rich repeat protein 2, neuronal	-1.15818	3.74111e-06	3.06946e-05	-0.402542	0.107681	0.252069
ENSMUSG00000026452.16	MGI:99666	Syt2	synaptotagmin II	-1.98831	1.299e-10	4.4747e-09	-0.839809	0.00486837	0.0260555
ENSMUSG00000026494.13	MGI:2447076	Kif26b	kinesin family member 26B	-1.30345	0.000550948	0.00237121	-0.500161	0.184571	0.364938
ENSMUSG00000026585.14	MGI:107566	Kifap3	kinesin-associated protein 3	-0.707834	4.67721e-08	7.10128e-07	-0.410841	0.00149889	0.0104874
ENSMUSG00000026587.16	MGI:1098567	Astn1	astrotactin 1	-0.817991	4.31657e-07	4.75343e-06	-0.398356	0.0137365	0.0572588
ENSMUSG00000026614.8	MGI:2685058	Slc30a10	solute carrier family 30, member 10	-1.63714	3.53496e-12	2.11174e-10	-0.717387	0.00198353	0.0130432
ENSMUSG00000026667.15	MGI:1341908	Uhmk1	U2AF homology motif (UHM) kinase 1	-0.592093	1.30448e-05	9.03257e-05	-0.289369	0.0329563	0.108728
ENSMUSG00000026688.6	MGI:1913697	Mgst3	microsomal glutathione S-transferase 3	-0.741949	2.53493e-05	0.000161646	-0.546263	0.00178945	0.012037
ENSMUSG00000026737.13	MGI:1298206	Pip4k2a	phosphatidylinositol-5-phosphate 4-kinase, type II, alpha	-0.610798	1.61015e-06	1.48604e-05	-0.397929	0.00176298	0.0118989
ENSMUSG00000026764.16	MGI:1098269	Kif5c	kinesin family member 5C	-0.659288	0.000262862	0.00123864	-0.133703	0.459182	0.654562
ENSMUSG00000026765.13	MGI:1919147	Lypd6b	LY6/PLAUR domain containing 6B	-1.65238	1.70415e-08	2.9801e-07	-0.378716	0.16016	0.332132
ENSMUSG00000026782.16	MGI:106913	Abi2	abl interactor 2	-0.590181	1.37477e-06	1.29718e-05	-0.330881	0.00675939	0.033478
ENSMUSG00000026811.19	MGI:1355316	St6galnac6	ST6 (alpha-N-acetyl-neuraminyl-2,3-beta-galactosyl-1,3)-N-acetylgalactosaminide alpha-2,6-sialyltransferase 6	-0.635058	1.11084e-06	1.08165e-05	-0.223797	0.0854255	0.214336
ENSMUSG00000026825.18	MGI:107384	Dnm1	dynamin 1	-1.17266	2.04941e-06	1.83224e-05	-0.45618	0.0646651	0.17612
ENSMUSG00000026833.19	MGI:1860437	Olfm1	olfactomedin 1	-1.46277	1.5547e-06	1.44166e-05	-0.517637	0.0890894	0.220963
ENSMUSG00000026854.17	MGI:1921520	Usp20	ubiquitin specific peptidase 20	-0.702355	1.65363e-09	3.94627e-08	-0.202233	0.0812605	0.2068
ENSMUSG00000026872.19	MGI:1344407	Zeb2	zinc finger E-box binding homeobox 2	-0.775249	7.76987e-07	7.9002e-06	-0.113044	0.471007	0.663685
ENSMUSG00000026890.20	MGI:1306803	Lhx6	LIM homeobox protein 6	-2.15394	8.03575e-10	2.12479e-08	-0.601132	0.0781884	0.201212
ENSMUSG00000026915.17	MGI:104626	Strbp	spermatid perinuclear RNA binding protein	-0.661624	2.56904e-09	5.82173e-08	-0.163379	0.139696	0.301855
ENSMUSG00000026950.19	MGI:97292	Neb	nebulin	-0.884471	0.000207161	0.00100805	-0.528637	0.0151892	0.0617249
ENSMUSG00000026959.14	MGI:95819	Grin1	glutamate receptor, ionotropic, NMDA1 (zeta 1)	-0.587135	0.000302728	0.00140516	-0.205368	0.206255	0.393008
ENSMUSG00000027035.11	MGI:2442564	Cers6	ceramide synthase 6	-0.67392	5.48361e-05	0.000316749	-0.378673	0.0232366	0.0845003
ENSMUSG00000027104.19	MGI:109349	Atf2	activating transcription factor 2	-0.645982	7.8582e-10	2.07984e-08	-0.265675	0.0112039	0.0491697
ENSMUSG00000027208.15	MGI:95521	Fgf7	fibroblast growth factor 7	-2.3394	1.12471e-06	1.09321e-05	-0.361934	0.327216	0.53106
ENSMUSG00000027210.21	MGI:108564	Meis2	Meis homeobox 2	-1.16185	0.00035431	0.00161248	-0.803393	0.0129866	0.0548605
ENSMUSG00000027254.14	MGI:1306776	Map1a	microtubule-associated protein 1 A	-0.9429	2.59807e-08	4.28376e-07	-0.344612	0.0418567	0.129159
ENSMUSG00000027270.15	MGI:1923411	Lamp5	lysosomal-associated membrane protein family, member 5	-2.81576	6.46177e-06	4.92582e-05	-0.690172	0.266665	0.465769
ENSMUSG00000027273.14	MGI:98331	Snap25	synaptosomal-associated protein 25	-1.30098	6.54297e-10	1.78338e-08	-0.572222	0.00658464	0.0328699
ENSMUSG00000027286.17	MGI:1913856	Lrrc57	leucine rich repeat containing 57	-0.608669	1.42053e-07	1.84078e-06	-0.175888	0.128047	0.283773
ENSMUSG00000027296.8	MGI:1333822	Itpka	inositol 1,4,5-trisphosphate 3-kinase A	-1.46886	1.27989e-06	1.22196e-05	-0.607805	0.0449464	0.135689
ENSMUSG00000027316.16	MGI:1341873	Gfra4	glial cell line derived neurotrophic factor family receptor alpha 4	-0.909215	3.29401e-05	0.000202879	-0.543682	0.0128683	0.0544851
ENSMUSG00000027347.19	MGI:1314635	Rasgrp1	RAS guanyl releasing protein 1	-0.902113	0.000423231	0.00188454	0.236645	0.355041	0.558389
ENSMUSG00000027356.9	MGI:2443583	Fermt1	fermitin family member 1	-4.79665	7.51934e-07	7.69904e-06	-1.44981	0.00623983	0.0315947
ENSMUSG00000027359.17	MGI:1347099	Slc27a2	solute carrier family 27 (fatty acid transporter), member 2	-2.33321	1.6045e-08	2.82447e-07	-1.20389	0.00200741	0.0131535
ENSMUSG00000027419.10	MGI:97512	Pcsk2	proprotein convertase subtilisin/kexin type 2	-1.81278	2.0272e-09	4.73473e-08	-0.468978	0.120626	0.27245
ENSMUSG00000027457.16	MGI:2139270	Snph	syntaphilin	-1.14972	1.9842e-05	0.000130503	-0.164702	0.540902	0.719358
ENSMUSG00000027500.11	MGI:98241	Stmn2	stathmin-like 2	-1.52051	1.78809e-05	0.000119496	-0.136555	0.699813	0.831236
ENSMUSG00000027568.10	MGI:97386	Ntsr1	neurotensin receptor 1	-3.56706	1.67742e-10	5.46905e-09	-1.45067	0.00167336	0.0114296
ENSMUSG00000027574.16	MGI:1915372	Nkain4	Na+/K+ transporting ATPase interacting 4	-1.29775	1.28669e-15	2.52008e-13	-0.441963	0.00546233	0.0285478
ENSMUSG00000027624.21	MGI:103010	Epb41l1	erythrocyte membrane protein band 4.1 like 1	-0.616663	0.000603193	0.00256507	-0.1153	0.521219	0.704324
ENSMUSG00000027636.12	MGI:1925049	Sla2	Src-like-adaptor 2	-1.95029	0.000251316	0.00119182	-0.417347	0.379144	0.581942
ENSMUSG00000027677.18	MGI:1914370	Ttc14	tetratricopeptide repeat domain 14	-0.657519	8.83582e-05	0.000479	-0.267323	0.110816	0.256981
ENSMUSG00000027737.11	MGI:1347355	Slc7a11	solute carrier family 7 (cationic amino acid transporter, y+ system), member 11	-0.668295	0.00141006	0.00532414	-0.272628	0.19322	0.375673
ENSMUSG00000027799.13	MGI:1347075	Nbea	neurobeachin	-0.835365	0.000274316	0.00128653	-0.356912	0.119984	0.271264
ENSMUSG00000027827.18	MGI:109155	Kcnab1	potassium voltage-gated channel, shaker-related subfamily, beta member 1	-0.995773	1.87372e-05	0.000124186	-0.559687	0.0161118	0.0646651
ENSMUSG00000027834.16	MGI:1194506	Serpini1	serine (or cysteine) peptidase inhibitor, clade I, member 1	-2.12672	3.70186e-15	6.38396e-13	-0.809002	0.00266884	0.0164479
ENSMUSG00000027887.12	MGI:1328311	Sypl2	synaptophysin-like 2	-1.02048	0.00115409	0.00449124	-0.932878	0.00313059	0.0185741
ENSMUSG00000027965.16	MGI:2387329	Olfm3	olfactomedin 3	-1.01372	0.000778196	0.00318337	-0.665039	0.0268078	0.0936232
ENSMUSG00000027967.9	MGI:109619	Neurog2	neurogenin 2	-2.53468	9.5834e-06	6.95262e-05	-0.578621	0.233966	0.427968
ENSMUSG00000027993.17	MGI:1933163	Trim2	tripartite motif-containing 2	-0.689305	0.00157389	0.005866	-0.389767	0.0738613	0.193831
ENSMUSG00000028005.14	MGI:1860604	Gucy1b1	guanylate cyclase 1, soluble, beta 1	-0.826142	4.07989e-06	3.31291e-05	-0.362438	0.0430519	0.131781
ENSMUSG00000028020.17	MGI:95751	Glrb	glycine receptor, beta subunit	-0.65925	5.4703e-05	0.000316113	-0.371141	0.0229908	0.0838253
ENSMUSG00000028033.17	MGI:1924937	Kcnq5	potassium voltage-gated channel, subfamily Q, member 5	-3.25777	5.84391e-09	1.16694e-07	-1.19955	0.0310934	0.104343
ENSMUSG00000028100.12	MGI:1925623	Nudt17	nudix (nucleoside diphosphate linked moiety X)-type motif 17	-1.27852	1.5227e-10	5.04302e-09	-0.587907	0.002016	0.0131882
ENSMUSG00000028145.10	MGI:1923028	Them4	thioesterase superfamily member 4	-0.929745	8.33272e-08	1.17351e-06	0.127434	0.460036	0.655236
ENSMUSG00000028161.18	MGI:107164	Ppp3ca	protein phosphatase 3, catalytic subunit, alpha isoform	-1.33232	8.3287e-06	6.15498e-05	-0.453874	0.128953	0.285424
ENSMUSG00000028248.16	MGI:1913875	Pnisr	PNN interacting serine/arginine-rich	-0.604909	0.000144013	0.000733574	-0.0623037	0.695283	0.828804
ENSMUSG00000028307.10	MGI:87995	Aldob	aldolase B, fructose-bisphosphate	-2.53944	3.62815e-10	1.07434e-08	-1.13869	0.00168888	0.0115184
ENSMUSG00000028337.15	MGI:1345966	Coro2a	coronin, actin binding protein 2A	-0.626354	0.00107542	0.00421678	-0.369146	0.0522206	0.15113
ENSMUSG00000028347.15	MGI:1926810	Tmeff1	transmembrane protein with EGF-like and two follistatin-like domains 1	-0.626791	1.04431e-06	1.02414e-05	-0.197791	0.122643	0.275556
ENSMUSG00000028358.16	MGI:1919950	Zfp618	zinc finger protein 618	-1.15841	0.000340328	0.00155633	-0.05486	0.859009	0.927446
ENSMUSG00000028360.11	MGI:3035141	Slc44a5	solute carrier family 44, member 5	-1.83441	2.15397e-07	2.63786e-06	-0.851327	0.0157665	0.063584
ENSMUSG00000028488.16	MGI:700009	Sh3gl2	SH3-domain GRB2-like 2	-1.74875	2.63868e-12	1.64438e-10	-0.55149	0.0271711	0.0944917
ENSMUSG00000028496.18	MGI:1917372	Mllt3	myeloid/lymphoid or mixed-lineage leukemia; translocated to, 3	-0.597244	1.35718e-05	9.34555e-05	-0.384997	0.00486557	0.0260555
ENSMUSG00000028517.9	MGI:1915166	Plpp3	phospholipid phosphatase 3	-0.668691	3.13116e-09	6.8466e-08	-0.0225538	0.841524	0.917094
ENSMUSG00000028524.22	MGI:1920344	Sgip1	SH3-domain GRB2-like (endophilin) interacting protein 1	-0.800667	5.18118e-08	7.78454e-07	-0.385141	0.00873017	0.040604
ENSMUSG00000028527.19	MGI:87979	Ak4	adenylate kinase 4	-1.93523	7.78584e-09	1.50343e-07	-0.788639	0.0181132	0.0706063
ENSMUSG00000028528.18	MGI:1919935	Dnajc6	DnaJ heat shock protein family (Hsp40) member C6	-1.25303	2.38443e-07	2.87516e-06	-0.581783	0.0163684	0.0653785
ENSMUSG00000028532.15	MGI:2444177	Cachd1	cache domain containing 1	-1.28132	1.83346e-07	2.29349e-06	0.034754	0.887141	0.943832
ENSMUSG00000028545.14	MGI:1914871	Bend5	BEN domain containing 5	-0.817339	0.00116387	0.00452544	-0.331986	0.168711	0.343902
ENSMUSG00000028546.18	MGI:107427	Elavl4	ELAV like RNA binding protein 4	-2.46729	4.85605e-14	5.77553e-12	-0.764761	0.0181149	0.0706063
ENSMUSG00000028572.14	MGI:1925213	Hook1	hook microtubule tethering protein 1	-0.663285	0.00119413	0.00462667	-0.317668	0.119981	0.271264
ENSMUSG00000028630.10	MGI:1330301	Dyrk2	dual-specificity tyrosine-(Y)-phosphorylation regulated kinase 2	-0.650312	3.21027e-06	2.69521e-05	-0.381946	0.00601895	0.0307027
ENSMUSG00000028654.14	MGI:96799	Mycl	v-myc avian myelocytomatosis viral oncogene lung carcinoma derived	-1.35732	2.33651e-06	2.05146e-05	-0.501957	0.0800983	0.20479
ENSMUSG00000028661.9	MGI:109378	Epha8	Eph receptor A8	-1.26328	0.00154576	0.00577055	0.162894	0.675479	0.815835
ENSMUSG00000028710.19	MGI:2180560	Atpaf1	ATP synthase mitochondrial F1 complex assembly factor 1	-0.763907	1.32333e-10	4.54159e-09	-0.355706	0.00250901	0.0156999
ENSMUSG00000028756.13	MGI:1916193	Pink1	PTEN induced putative kinase 1	-0.835704	4.10583e-09	8.63358e-08	-0.238879	0.0925751	0.226801
ENSMUSG00000028766.11	MGI:87983	Alpl	alkaline phosphatase, liver/bone/kidney	-0.592493	0.00101596	0.00401049	-0.470854	0.00617746	0.0313383
ENSMUSG00000028785.14	MGI:1336200	Hpca	hippocalcin	-1.98964	1.28345e-06	1.22492e-05	-0.749985	0.0679302	0.1829
ENSMUSG00000028833.14	MGI:1347351	Ncdn	neurochondrin	-1.28833	4.31332e-05	0.00025622	-0.329662	0.295287	0.498346
ENSMUSG00000028838.12	MGI:1888742	Extl1	exostosin-like glycosyltransferase 1	-1.66869	1.00439e-08	1.8735e-07	-0.362274	0.211941	0.400164
ENSMUSG00000028909.18	MGI:1321151	Ptpru	protein tyrosine phosphatase, receptor type, U	-1.62275	0.000278291	0.00130262	-0.542836	0.222493	0.412982
ENSMUSG00000028926.16	MGI:894318	Cdk14	cyclin-dependent kinase 14	-1.94509	2.57789e-10	7.99427e-09	-0.747482	0.0150341	0.0612496
ENSMUSG00000028931.13	MGI:109239	Kcnab2	potassium voltage-gated channel, shaker-related subfamily, beta member 2	-1.3197	1.67638e-07	2.12218e-06	-0.583695	0.0206342	0.0776873
ENSMUSG00000028957.13	MGI:1277134	Per3	period circadian clock 3	-1.28307	3.86686e-05	0.000233083	-0.137724	0.658389	0.804204
ENSMUSG00000028982.10	MGI:1917806	Slc25a33	solute carrier family 25, member 33	-0.723545	5.75707e-06	4.47192e-05	-0.341713	0.032102	0.106726
ENSMUSG00000029001.16	MGI:1354744	Fbxo44	F-box protein 44	-0.641193	7.06885e-06	5.33961e-05	-0.21035	0.138877	0.300673
ENSMUSG00000029026.18	MGI:1336991	Trp73	transformation related protein 73	-0.834678	0.000160144	0.000804488	0.0238443	0.913477	0.957811
ENSMUSG00000029053.17	MGI:97602	Prkcz	protein kinase C, zeta	-0.866329	5.36637e-08	7.99706e-07	-0.344396	0.030417	0.102704
ENSMUSG00000029054.9	MGI:95622	Gabrd	gamma-aminobutyric acid (GABA) A receptor, subunit delta	-1.69835	3.78709e-10	1.11418e-08	-0.828869	0.00215363	0.0138697
ENSMUSG00000029055.18	MGI:2443078	Plch2	phospholipase C, eta 2	-1.29227	1.46671e-05	0.000100017	-0.444288	0.135162	0.295134
ENSMUSG00000029095.18	MGI:2385758	Ablim2	actin-binding LIM protein 2	-0.958498	3.43322e-12	2.06445e-10	-0.140927	0.304255	0.507602
ENSMUSG00000029101.17	MGI:1918979	Rgs12	regulator of G-protein signaling 12	-0.904992	4.54291e-08	6.92806e-07	-0.222677	0.176783	0.354939
ENSMUSG00000029120.11	MGI:2442660	Ppp2r2c	protein phosphatase 2, regulatory subunit B, gamma	-0.75801	0.00025549	0.00120823	-0.0551182	0.790274	0.888218
ENSMUSG00000029121.17	MGI:107793	Crmp1	collapsin response mediator protein 1	-0.624461	0.000997749	0.00395179	-0.510004	0.00716804	0.0349264
ENSMUSG00000029126.8	MGI:109149	Nsg1	neuron specific gene family member 1	-0.755513	2.78604e-05	0.000175379	-0.358918	0.0462501	0.138434
ENSMUSG00000029130.13	MGI:1861747	Rnf32	ring finger protein 32	-0.78407	0.00030276	0.00140516	-0.41958	0.0524488	0.151603
ENSMUSG00000029153.12	MGI:1916377	Ociad2	OCIA domain containing 2	-1.02277	0.000656064	0.00275023	-0.467932	0.118284	0.268524
ENSMUSG00000029245.17	MGI:99654	Epha5	Eph receptor A5	-1.32022	3.19172e-07	3.6741e-06	-0.0816451	0.751752	0.863601
ENSMUSG00000029287.15	MGI:104637	Tgfbr3	transforming growth factor, beta receptor III	-0.640269	0.000378769	0.00170961	-0.430078	0.0162956	0.0651743
ENSMUSG00000029337.3	MGI:95519	Fgf5	fibroblast growth factor 5	-0.697085	0.000567855	0.00243404	-0.384505	0.0563895	0.159998
ENSMUSG00000029348.12	MGI:1920148	Asphd2	aspartate beta-hydroxylase domain containing 2	-0.812696	0.000219466	0.00106021	-0.158588	0.470557	0.66324
ENSMUSG00000029403.15	MGI:1858227	Cdkl2	cyclin-dependent kinase-like 2 (CDC2-related kinase)	-0.672176	0.000216083	0.00104645	-0.26944	0.136024	0.296423
ENSMUSG00000029419.9	MGI:2685842	Ajm1	apical junction component 1	-0.718842	0.00166053	0.00615378	0.00528438	0.981537	0.991768
ENSMUSG00000029423.11	MGI:1928897	Piwil1	piwi-like RNA-mediated gene silencing 1	-3.50643	0.00249267	0.00876607	-2.00414	0.00952109	0.0433845
ENSMUSG00000029438.10	MGI:1924295	Bcl7a	B cell CLL/lymphoma 7A	-0.742086	3.09882e-05	0.000192341	-0.249586	0.16088	0.33308
ENSMUSG00000029442.19	MGI:1918495	Wdr66	WD repeat domain 66	-1.03803	0.00248451	0.00874073	-0.746463	0.0229767	0.0838085
ENSMUSG00000029576.18	MGI:2443088	Radil	Ras association and DIL domains	-0.681976	0.000906724	0.00363379	-0.0354728	0.858971	0.927446
ENSMUSG00000029602.12	MGI:1330842	Rasal1	RAS protein activator like 1 (GAP1 like)	-1.67669	2.22913e-06	1.97107e-05	-0.704944	0.0458118	0.137516
ENSMUSG00000029608.11	MGI:102788	Rph3a	rabphilin 3A	-0.839104	0.000594765	0.00253237	-0.187776	0.442233	0.640155
ENSMUSG00000029636.12	MGI:2658986	Wasf3	WASP family, member 3	-0.622861	5.73439e-07	6.07797e-06	-0.382433	0.00212314	0.0137137
ENSMUSG00000029651.17	MGI:1915388	Mtus2	microtubule associated tumor suppressor candidate 2	-1.28601	1.83183e-08	3.16701e-07	-0.274617	0.226991	0.418587
ENSMUSG00000029716.14	MGI:1354956	Tfr2	transferrin receptor 2	-1.20002	0.00014558	0.000739772	-0.336868	0.270856	0.470436
ENSMUSG00000029754.14	MGI:101927	Dlx6	distal-less homeobox 6	-2.84812	5.69385e-07	6.042e-06	-0.9299	0.0534812	0.153806
ENSMUSG00000029755.11	MGI:101926	Dlx5	distal-less homeobox 5	-2.57538	2.63743e-07	3.13202e-06	-0.142786	0.717039	0.84258
ENSMUSG00000029765.13	MGI:2179061	Plxna4	plexin A4	-0.651215	0.001993	0.00720666	-0.19583	0.352505	0.556373
ENSMUSG00000029778.13	MGI:108449	Adcyap1r1	adenylate cyclase activating polypeptide 1 receptor 1	-0.58673	3.72664e-05	0.000225424	-0.351604	0.0134303	0.056329
ENSMUSG00000029862.17	MGI:88417	Clcn1	chloride channel, voltage-sensitive 1	-0.909216	0.000103487	0.000548545	-0.114179	0.595948	0.761161
ENSMUSG00000030000.11	MGI:87919	Add2	adducin 2 (beta)	-1.02561	0.000718238	0.0029718	-0.526745	0.0823239	0.208771
ENSMUSG00000030020.14	MGI:1925144	Prickle2	prickle planar cell polarity protein 2	-0.88817	2.03539e-07	2.50946e-06	-0.525989	0.00208298	0.0135145
ENSMUSG00000030084.12	MGI:107685	Plxna1	plexin A1	-1.1442	2.4532e-08	4.062e-07	-0.431407	0.0351744	0.114073
ENSMUSG00000030087.12	MGI:1929988	Klf15	Kruppel-like factor 15	-0.832798	2.48923e-06	2.16888e-05	-0.350298	0.0448308	0.13545
ENSMUSG00000030098.16	MGI:2681173	Grip2	glutamate receptor interacting protein 2	-1.31454	1.70059e-10	5.52489e-09	-0.155392	0.441579	0.639517
ENSMUSG00000030126.18	MGI:2442368	Tmcc1	transmembrane and coiled coil domains 1	-0.933674	1.5384e-09	3.70676e-08	-0.313916	0.041862	0.129159
ENSMUSG00000030134.12	MGI:1917977	Rasgef1a	RasGEF domain family, member 1A	-1.39139	3.88973e-07	4.348e-06	-0.56428	0.0394836	0.124001
ENSMUSG00000030137.9	MGI:1858225	Tuba8	tubulin, alpha 8	-1.4173	0.00193837	0.00703788	-0.0944187	0.830197	0.9109
ENSMUSG00000030161.9	MGI:1914980	Gabarapl1	gamma-aminobutyric acid (GABA) A receptor-associated protein-like 1	-0.624654	1.63297e-06	1.50182e-05	-0.310921	0.0169608	0.0671089
ENSMUSG00000030207.16	MGI:1921775	Fam234b	family with sequence similarity 234, member B	-0.67847	5.34096e-09	1.07839e-07	-0.277287	0.016908	0.066955
ENSMUSG00000030209.15	MGI:95821	Grin2b	glutamate receptor, ionotropic, NMDA2B (epsilon 2)	-0.968994	0.000386615	0.00174158	-0.448566	0.100358	0.239641
ENSMUSG00000030222.14	MGI:2665139	Rerg	RAS-like, estrogen-regulated, growth-inhibitor	-2.09091	6.41499e-07	6.72396e-06	-0.790191	0.058263	0.163748
ENSMUSG00000030226.13	MGI:102810	Lmo3	LIM domain only 3	-1.56157	7.27775e-06	5.47479e-05	-0.91159	0.00880613	0.0408888
ENSMUSG00000030230.16	MGI:2150308	Plcz1	phospholipase C, zeta 1	-1.28068	0.00147574	0.00554083	-0.553395	0.116696	0.26622
ENSMUSG00000030244.8	MGI:2385254	Gys2	glycogen synthase 2	-2.64552	0.00235553	0.00835235	-0.909057	0.18565	0.366197
ENSMUSG00000030257.17	MGI:2152938	Srgap3	SLIT-ROBO Rho GTPase activating protein 3	-0.970127	3.44331e-05	0.000210885	-0.235375	0.314729	0.518286
ENSMUSG00000030268.18	MGI:104861	Bcat1	branched chain aminotransferase 1, cytosolic	-0.60894	3.95066e-05	0.000237455	-0.3297	0.0254693	0.0902422
ENSMUSG00000030270.12	MGI:2443052	Cpne9	copine family member IX	-1.51452	0.00199512	0.00721241	0.975031	0.0463997	0.138716
ENSMUSG00000030329.12	MGI:2441908	Pianp	PILR alpha associated neural protein	-1.05184	9.49922e-06	6.90166e-05	-0.332554	0.160901	0.333094
ENSMUSG00000030337.17	MGI:1313276	Vamp1	vesicle-associated membrane protein 1	-1.01965	2.25559e-07	2.73544e-06	-0.17554	0.371103	0.574582
ENSMUSG00000030382.16	MGI:1347100	Slc27a5	solute carrier family 27 (fatty acid transporter), member 5	-2.20858	4.34891e-05	0.000258223	-0.193856	0.650742	0.799045
ENSMUSG00000030465.20	MGI:1918215	Psd3	pleckstrin and Sec7 domain containing 3	-1.45433	2.01304e-08	3.43663e-07	-0.629046	0.0151848	0.0617249
ENSMUSG00000030518.18	MGI:1917888	Fam189a1	family with sequence similarity 189, member A1	-1.32958	1.06823e-05	7.58244e-05	-0.78518	0.00920044	0.0422598
ENSMUSG00000030525.9	MGI:99779	Chrna7	cholinergic receptor, nicotinic, alpha polypeptide 7	-1.47226	1.01592e-05	7.28087e-05	-0.718883	0.030056	0.1017
ENSMUSG00000030557.18	MGI:99532	Mef2a	myocyte enhancer factor 2A	-0.778077	3.99722e-10	1.17098e-08	-0.306887	0.0134844	0.0564945
ENSMUSG00000030583.17	MGI:1921456	Sipa1l3	signal-induced proliferation-associated 1 like 3	-0.755676	0.000612528	0.00259832	-0.267067	0.225829	0.416985
ENSMUSG00000030621.18	MGI:1916679	Me3	malic enzyme 3, NADP(+)-dependent, mitochondrial	-1.04758	3.12731e-08	5.03823e-07	-0.46922	0.0129041	0.0546078
ENSMUSG00000030638.14	MGI:700011	Sh3gl3	SH3-domain GRB2-like 3	-0.620124	1.49915e-05	0.000102027	-0.385095	0.00674039	0.0334096
ENSMUSG00000030643.15	MGI:1923235	Rab30	RAB30, member RAS oncogene family	-1.05771	1.14155e-08	2.10075e-07	-0.380314	0.039335	0.123631
ENSMUSG00000030653.18	MGI:5804952	Gm45837	predicted gene 45837	-1.23153	0.000183614	0.000907641	-0.268597	0.414376	0.61608
ENSMUSG00000030683.12	MGI:2385295	Sez6l2	seizure related 6 homolog like 2	-0.725506	7.53775e-05	0.000417377	-0.39069	0.0329533	0.108728
ENSMUSG00000030711.17	MGI:102896	Sult1a1	sulfotransferase family 1A, phenol-preferring, member 1	-0.921496	0.00106229	0.00417247	-0.838631	0.00276854	0.0169188
ENSMUSG00000030729.18	MGI:1918224	Pgm2l1	phosphoglucomutase 2-like 1	-1.51968	1.65153e-08	2.90102e-07	-0.659123	0.0142986	0.0589426
ENSMUSG00000030731.14	MGI:99665	Syt3	synaptotagmin III	-0.897239	6.35288e-06	4.85902e-05	-0.311942	0.115079	0.263864
ENSMUSG00000030772.7	MGI:1354952	Dkk3	dickkopf WNT signaling pathway inhibitor 3	-1.47178	1.2723e-13	1.24594e-11	-0.487251	0.0140486	0.0582213
ENSMUSG00000030792.9	MGI:1354963	Dkkl1	dickkopf-like 1	-1.81158	0.00152834	0.00571097	-0.632153	0.170439	0.346425
ENSMUSG00000030811.15	MGI:3039600	Fbxl19	F-box and leucine-rich repeat protein 19	-0.702263	2.12018e-06	1.88997e-05	-0.204639	0.162991	0.335888
ENSMUSG00000030898.16	MGI:99479	Cckbr	cholecystokinin B receptor	-2.86259	5.63295e-11	2.216e-09	-0.838855	0.0436339	0.133038
ENSMUSG00000031109.17	MGI:2384799	Enox2	ecto-NOX disulfide-thiol exchanger 2	-0.683716	1.445e-07	1.86774e-06	-0.347737	0.00639693	0.0322105
ENSMUSG00000031111.17	MGI:2147913	Igsf1	immunoglobulin superfamily, member 1	-1.22195	0.000584735	0.0024947	-0.828681	0.0180202	0.0703398
ENSMUSG00000031139.17	MGI:96932	Mcf2	mcf.2 transforming sequence	-1.52595	2.44767e-06	2.13471e-05	-0.643261	0.0257932	0.0909628
ENSMUSG00000031144.16	MGI:98467	Syp	synaptophysin	-0.767822	2.12659e-05	0.000138803	-0.367088	0.0420668	0.129508
ENSMUSG00000031166.14	MGI:1914661	Wdr13	WD repeat domain 13	-0.743483	9.03856e-07	9.00899e-06	-0.246028	0.103802	0.245595
ENSMUSG00000031202.6	MGI:1915040	Rab39b	RAB39B, member RAS oncogene family	-0.656342	4.46837e-05	0.000264514	-0.456172	0.00443165	0.0242968
ENSMUSG00000031210.11	MGI:1923456	Gpr165	G protein-coupled receptor 165	-1.7177	2.78903e-07	3.28079e-06	-0.886402	0.00442077	0.0242631
ENSMUSG00000031230.4	MGI:1931627	Fgf16	fibroblast growth factor 16	-2.34124	2.09383e-05	0.000136958	-1.35876	0.00880671	0.0408888
ENSMUSG00000031323.9	MGI:1918137	Dmrtc1a	DMRT-like family C1a	-0.667848	0.000586913	0.00250321	-0.219482	0.240904	0.436014
ENSMUSG00000031343.14	MGI:95615	Gabra3	gamma-aminobutyric acid (GABA) A receptor, subunit alpha 3	-2.10202	9.25578e-08	1.28049e-06	-1.22677	0.00161279	0.0111002
ENSMUSG00000031364.3	MGI:95836	Grpr	gastrin releasing peptide receptor	-2.45037	1.35704e-05	9.34555e-05	-0.795772	0.067722	0.182564
ENSMUSG00000031376.16	MGI:1347353	Atp2b3	ATPase, Ca++ transporting, plasma membrane 3	-1.17935	2.87942e-07	3.37193e-06	-0.549869	0.0166254	0.0661084
ENSMUSG00000031391.19	MGI:96721	L1cam	L1 cell adhesion molecule	-1.60648	6.23488e-08	9.10332e-07	-0.73991	0.0123819	0.053033
ENSMUSG00000031517.9	MGI:107671	Gpm6a	glycoprotein m6a	-0.722813	2.64775e-06	2.28738e-05	-0.428546	0.0053567	0.0280873
ENSMUSG00000031543.19	MGI:88024	Ank1	ankyrin 1, erythroid	-1.27929	6.00354e-10	1.65278e-08	-0.546515	0.0073484	0.0355673
ENSMUSG00000031549.17	MGI:2142489	Ido2	indoleamine 2,3-dioxygenase 2	-2.33835	2.01893e-08	3.44272e-07	-1.12501	0.00265729	0.0163973
ENSMUSG00000031558.16	MGI:1315205	Slit2	slit guidance ligand 2	-1.93332	2.17908e-06	1.93555e-05	-0.787481	0.051998	0.150703
ENSMUSG00000031574.9	MGI:102760	Star	steroidogenic acute regulatory protein	-0.847087	0.000854447	0.00345254	-0.0477086	0.849449	0.921345
ENSMUSG00000031605.9	MGI:1924363	Klhl2	kelch-like 2, Mayven	-0.690867	0.00116244	0.00452115	-0.0585427	0.783105	0.883832
ENSMUSG00000031618.14	MGI:99459	Nr3c2	nuclear receptor subfamily 3, group C, member 2	-1.10352	0.00018184	0.000900173	-0.777772	0.00832426	0.0391325
ENSMUSG00000031642.10	MGI:1913066	Sh3rf1	SH3 domain containing ring finger 1	-1.15911	1.36675e-07	1.78288e-06	-0.461329	0.0348843	0.113378
ENSMUSG00000031654.17	MGI:88281	Cbln1	cerebellin 1 precursor protein	-1.52754	1.10836e-06	1.08e-05	0.0334563	0.904384	0.952648
ENSMUSG00000031750.16	MGI:1923777	Il34	interleukin 34	-1.78272	7.32797e-09	1.42506e-07	-0.505744	0.0983789	0.236737
ENSMUSG00000031772.18	MGI:2183572	Cntnap4	contactin associated protein-like 4	-2.17143	4.55679e-10	1.30425e-08	-1.026	0.00253736	0.0158361
ENSMUSG00000031906.10	MGI:1927578	Smpd3	sphingomyelin phosphodiesterase 3, neutral	-1.66635	1.05844e-11	5.40457e-10	-0.611726	0.01236	0.052977
ENSMUSG00000031910.15	MGI:109599	Has3	hyaluronan synthase 3	-2.38189	5.17066e-10	1.45714e-08	-0.327832	0.353531	0.557218
ENSMUSG00000031937.8	MGI:1916387	Vstm5	V-set and transmembrane domain containing 5	-0.897133	5.76153e-05	0.000330366	-0.379005	0.072579	0.191517
ENSMUSG00000031970.18	MGI:1919435	Dbndd1	dysbindin (dystrobrevin binding protein 1) domain containing 1	-1.86771	8.67032e-10	2.26419e-08	-0.16377	0.571448	0.743328
ENSMUSG00000032011.6	MGI:98747	Thy1	thymus cell antigen 1, theta	-0.747546	2.89936e-06	2.46896e-05	-0.286604	0.0727871	0.191838
ENSMUSG00000032017.15	MGI:95817	Grik4	glutamate receptor, ionotropic, kainate 4	-1.10361	0.000318573	0.00146885	-0.0826214	0.786901	0.886042
ENSMUSG00000032024.11	MGI:1918816	Clmp	CXADR-like membrane protein	-1.25983	1.30981e-05	9.06714e-05	-0.0221576	0.938806	0.97092
ENSMUSG00000032087.12	MGI:2150309	Dscaml1	DS cell adhesion molecule like 1	-1.6249	1.16066e-12	8.26629e-11	-0.608437	0.0076007	0.0365165
ENSMUSG00000032101.7	MGI:1353582	Ddx25	DEAD box helicase 25	-0.590208	4.68006e-05	0.000275085	-0.303086	0.0348093	0.113195
ENSMUSG00000032131.17	MGI:1890594	Abcg4	ATP binding cassette subfamily G member 4	-0.794703	2.23188e-07	2.71389e-06	-0.304734	0.0458413	0.13757
ENSMUSG00000032259.9	MGI:94924	Drd2	dopamine receptor D2	-2.76924	9.16736e-09	1.72881e-07	0.162611	0.694373	0.828526
ENSMUSG00000032262.14	MGI:1933331	Elovl4	elongation of very long chain fatty acids (FEN1/Elo2, SUR4/Elo3, yeast)-like 4	-0.707933	0.000483551	0.00211723	-0.585528	0.00379162	0.0214784
ENSMUSG00000032269.9	MGI:96282	Htr3a	5-hydroxytryptamine (serotonin) receptor 3A	-2.0621	0.00067883	0.00283268	-0.121688	0.838718	0.91523
ENSMUSG00000032328.13	MGI:106402	Tmem30a	transmembrane protein 30A	-0.587495	3.42602e-06	2.84671e-05	-0.345112	0.006346	0.0320244
ENSMUSG00000032333.7	MGI:1916356	Stoml1	stomatin-like 1	-0.684314	6.22101e-09	1.2343e-07	-0.131419	0.261184	0.460024
ENSMUSG00000032336.18	MGI:108077	Nptn	neuroplastin	-0.633679	5.5377e-07	5.90143e-06	-0.285228	0.0241811	0.0869413
ENSMUSG00000032356.13	MGI:99694	Rasgrf1	RAS protein-specific guanine nucleotide-releasing factor 1	-1.08911	2.91337e-05	0.000182302	-0.555656	0.0329193	0.108651
ENSMUSG00000032360.17	MGI:2680765	Hcrtr2	hypocretin (orexin) receptor 2	-1.91373	9.76434e-05	0.000522518	-1.07444	0.0197688	0.0752352
ENSMUSG00000032394.7	MGI:1202390	Igdcc3	immunoglobulin superfamily, DCC subclass, member 3	-1.14409	2.60799e-05	0.000165765	-0.550212	0.0403276	0.125846
ENSMUSG00000032417.11	MGI:1916769	Rwdd2a	RWD domain containing 2A	-1.24542	6.10069e-06	4.6989e-05	-0.762959	0.00487637	0.0260865
ENSMUSG00000032446.15	MGI:1201683	Eomes	eomesodermin	-2.79422	1.5313e-06	1.4228e-05	0.000717763	0.998936	0.999559
ENSMUSG00000032452.13	MGI:1929897	Clstn2	calsyntenin 2	-0.653373	0.00116531	0.00453038	-0.191365	0.341368	0.545512
ENSMUSG00000032507.16	MGI:1919429	Fbxl2	F-box and leucine-rich repeat protein 2	-1.07785	7.48063e-11	2.77563e-09	-0.417953	0.0105899	0.0470076
ENSMUSG00000032549.8	MGI:107283	Rab6b	RAB6B, member RAS oncogene family	-1.02704	4.5649e-10	1.30521e-08	-0.460614	0.00516357	0.027343
ENSMUSG00000032564.17	MGI:1921270	Cpne4	copine IV	-3.05916	1.22577e-07	1.62537e-06	-0.735654	0.202756	0.388404
ENSMUSG00000032589.15	MGI:1277955	Bsn	bassoon	-1.04737	1.83743e-05	0.000122051	-0.163863	0.502554	0.690197
ENSMUSG00000032606.8	MGI:1913507	Nicn1	nicolin 1	-0.633856	2.32122e-06	2.04196e-05	-0.0930167	0.486744	0.677541
ENSMUSG00000032625.15	MGI:2685683	Thsd7a	thrombospondin, type I, domain containing 7A	-0.854809	0.000786631	0.00321124	-0.512146	0.044144	0.134092
ENSMUSG00000032652.14	MGI:1889385	Crebl2	cAMP responsive element binding protein-like 2	-0.85099	2.41918e-08	4.01295e-07	-0.196637	0.193677	0.376316
ENSMUSG00000032705.10	MGI:1922485	Exd2	exonuclease 3'-5' domain containing 2	-0.763858	6.3357e-05	0.000359679	-0.316578	0.0970225	0.234518
ENSMUSG00000032773.10	MGI:88396	Chrm1	cholinergic receptor, muscarinic 1, CNS	-0.835333	3.42546e-05	0.000210078	-0.465845	0.0208255	0.0781678
ENSMUSG00000032807.6	MGI:1274782	Alox12b	arachidonate 12-lipoxygenase, 12R type	-4.33257	7.15539e-08	1.02616e-06	-1.87595	0.01043	0.0465597
ENSMUSG00000032827.16	MGI:2442401	Ppp1r9a	protein phosphatase 1, regulatory subunit 9A	-0.687578	0.000180812	0.000895372	-0.168985	0.35726	0.56034
ENSMUSG00000032878.17	MGI:2445069	Ccdc85a	coiled-coil domain containing 85A	-1.36724	2.95329e-05	0.000184505	-0.55888	0.0875575	0.218201
ENSMUSG00000032883.16	MGI:1921455	Acsl3	acyl-CoA synthetase long-chain family member 3	-0.817738	5.93286e-12	3.31998e-10	-0.348532	0.00334381	0.0194269
ENSMUSG00000032890.18	MGI:2443331	Rims3	regulating synaptic membrane exocytosis 3	-2.00393	1.19899e-11	5.93436e-10	-0.912308	0.00178733	0.0120294
ENSMUSG00000032898.10	MGI:1924223	Fbxo21	F-box protein 21	-0.648099	1.80002e-06	1.63595e-05	-0.299623	0.027042	0.09422
ENSMUSG00000032936.14	MGI:2384296	Camkv	CaM kinase-like vesicle-associated	-1.66771	1.36058e-08	2.45119e-07	-0.698165	0.0174097	0.0684906
ENSMUSG00000032940.17	MGI:2447622	Rbm11	RNA binding motif protein 11	-1.02711	7.36364e-06	5.53181e-05	-0.29468	0.186983	0.36768
ENSMUSG00000032985.16	MGI:1917876	5730522E02Rik	RIKEN cDNA 5730522E02 gene	-1.42278	3.13712e-05	0.000194264	-0.512334	0.118535	0.268941
ENSMUSG00000033009.16	MGI:2442978	Ogfod1	2-oxoglutarate and iron-dependent oxygenase domain containing 1	-0.752998	2.46373e-08	4.07697e-07	-0.357102	0.00806648	0.0381744
ENSMUSG00000033059.8	MGI:97828	Pygb	brain glycogen phosphorylase	-0.623461	2.82292e-08	4.60193e-07	-0.0758498	0.49893	0.687217
ENSMUSG00000033249.11	MGI:1347058	Hsf4	heat shock transcription factor 4	-0.777964	0.00265053	0.00922771	0.0496302	0.842518	0.917839
ENSMUSG00000033256.15	MGI:3613669	Shf	Src homology 2 domain containing F	-0.887871	4.75711e-06	3.79076e-05	-0.181149	0.346337	0.550207
ENSMUSG00000033352.12	MGI:1346869	Map2k4	mitogen-activated protein kinase kinase 4	-0.747401	1.63809e-05	0.000110462	-0.53281	0.0021043	0.0136176
ENSMUSG00000033389.17	MGI:2144423	Arhgap44	Rho GTPase activating protein 44	-0.788257	0.000132306	0.000679242	-0.12061	0.558355	0.733018
ENSMUSG00000033405.5	MGI:2443366	Nudt15	nudix (nucleoside diphosphate linked moiety X)-type motif 15	-0.620659	1.31999e-05	9.12151e-05	-0.219096	0.124123	0.27791
ENSMUSG00000033419.17	MGI:109132	Snap91	synaptosomal-associated protein 91	-0.772864	0.000263847	0.00124265	-0.234787	0.26746	0.466822
ENSMUSG00000033491.14	MGI:2444800	Prss35	protease, serine 35	-1.60315	4.01347e-05	0.000240703	-0.597753	0.117369	0.267026
ENSMUSG00000033510.15	MGI:2158505	Otud7a	OTU domain containing 7A	-0.627515	2.12915e-06	1.89673e-05	-0.21419	0.102613	0.243504
ENSMUSG00000033565.19	MGI:1933973	Rbfox2	RNA binding protein, fox-1 homolog (C. elegans) 2	-0.733123	7.42321e-06	5.56588e-05	-0.350775	0.0318562	0.106361
ENSMUSG00000033569.18	MGI:2441837	Adgrb3	adhesion G protein-coupled receptor B3	-0.876312	1.14438e-05	8.05205e-05	-0.540638	0.00671769	0.0333471
ENSMUSG00000033595.8	MGI:2182619	Lgi3	leucine-rich repeat LGI family, member 3	-0.91364	2.18812e-07	2.67308e-06	0.0290617	0.868711	0.93292
ENSMUSG00000033597.10	MGI:2442952	Caskin1	CASK interacting protein 1	-0.633661	3.43991e-05	0.000210729	-0.19285	0.206572	0.393289
ENSMUSG00000033615.10	MGI:104727	Cplx1	complexin 1	-0.906277	1.19404e-05	8.35858e-05	-0.371888	0.0721415	0.190714
ENSMUSG00000033634.8	MGI:2136446	Nat8f2	N-acetyltransferase 8 (GCN5-related) family member 2	-0.965636	0.00250346	0.0087947	-0.334147	0.29297	0.495962
ENSMUSG00000033676.14	MGI:95621	Gabrb3	gamma-aminobutyric acid (GABA) A receptor, subunit beta 3	-0.701691	0.000310723	0.00143774	-0.513606	0.0082975	0.0390372
ENSMUSG00000033697.17	MGI:107858	Arhgap39	Rho GTPase activating protein 39	-0.75563	7.42271e-07	7.61955e-06	-0.35229	0.02095	0.0784976
ENSMUSG00000033805.13	MGI:2686228	Ephx4	epoxide hydrolase 4	-0.601985	0.000875818	0.00352746	-0.262011	0.146229	0.3121
ENSMUSG00000033863.3	MGI:1333856	Klf9	Kruppel-like factor 9	-0.691276	0.000776101	0.00317622	-0.523332	0.0109579	0.048302
ENSMUSG00000033910.14	MGI:1926562	Gucy1a1	guanylate cyclase 1, soluble, alpha 1	-1.21936	6.36456e-08	9.26799e-07	-0.354586	0.112773	0.260016
ENSMUSG00000033948.4	MGI:1921714	Zswim5	zinc finger SWIM-type containing 5	-0.671367	5.0238e-06	3.97188e-05	-0.370465	0.0111913	0.0491238
ENSMUSG00000033953.11	MGI:107172	Ppp3r1	protein phosphatase 3, regulatory subunit B, alpha isoform (calcineurin B, type I)	-1.31277	1.015e-07	1.37778e-06	-0.423086	0.0861409	0.21555
ENSMUSG00000034040.18	MGI:2137594	Galnt17	polypeptide N-acetylgalactosaminyltransferase 17	-0.856815	0.000104435	0.000553033	-0.443536	0.0444994	0.134771
ENSMUSG00000034057.9	MGI:2685085	Myrfl	myelin regulatory factor-like	-1.71953	0.000746878	0.00307314	-1.08792	0.0395234	0.124093
ENSMUSG00000034071.16	MGI:3588205	Zfp551	zinc fingr protein 551	-0.679957	7.2436e-05	0.000404355	-0.22514	0.182028	0.361813
ENSMUSG00000034098.15	MGI:2442179	Fstl5	follistatin-like 5	-1.97838	1.06329e-08	1.9713e-07	-0.652212	0.0565224	0.160242
ENSMUSG00000034112.10	MGI:1916297	Atp2c2	ATPase, Ca++ transporting, type 2C, member 2	-1.945	0.000572527	0.00245024	-1.25469	0.0188927	0.0728817
ENSMUSG00000034171.14	MGI:109609	Faah	fatty acid amide hydrolase	-0.87626	0.00132688	0.00505251	-0.22647	0.406595	0.608318
ENSMUSG00000034187.19	MGI:104560	Nsf	N-ethylmaleimide sensitive fusion protein	-0.748598	0.00061896	0.00262154	-0.433601	0.0473787	0.140638
ENSMUSG00000034245.11	MGI:2385252	Hdac11	histone deacetylase 11	-1.29368	1.61553e-16	4.08389e-14	-0.456889	0.00343004	0.0197987
ENSMUSG00000034265.9	MGI:2653229	Zdhhc14	zinc finger, DHHC domain containing 14	-0.918464	5.38408e-07	5.75561e-06	-0.342079	0.0599774	0.167033
ENSMUSG00000034336.4	MGI:96568	Ina	internexin neuronal intermediate filament protein, alpha	-0.65624	0.000622135	0.00263337	-0.181543	0.343487	0.547343
ENSMUSG00000034472.14	MGI:1922391	Rasd2	RASD family, member 2	-2.05299	2.71054e-11	1.16311e-09	-0.624538	0.0419993	0.12943
ENSMUSG00000034488.15	MGI:1329025	Edil3	EGF-like repeats and discoidin I-like domains 3	-0.707235	6.86328e-05	0.000385875	-0.0678379	0.701814	0.832502
ENSMUSG00000034570.13	MGI:2158663	Inpp5j	inositol polyphosphate 5-phosphatase J	-1.09275	0.000787114	0.00321219	-0.356182	0.273523	0.473591
ENSMUSG00000034636.10	MGI:2685277	Zyg11b	zyg-ll family member B, cell cycle regulator	-0.610078	3.30072e-07	3.78211e-06	-0.280814	0.0186723	0.0722342
ENSMUSG00000034639.8	MGI:1921979	Setmar	SET domain without mariner transposase fusion	-0.877989	1.46392e-07	1.88808e-06	-0.48583	0.00297834	0.0178782
ENSMUSG00000034731.12	MGI:2444188	Dgkh	diacylglycerol kinase, eta	-1.66884	6.20942e-05	0.000353315	-0.9759	0.0191774	0.0736843
ENSMUSG00000034768.5	MGI:2654437	Asb16	ankyrin repeat and SOCS box-containing 16	-1.29475	4.61173e-05	0.000271768	-0.540897	0.0624975	0.17201
ENSMUSG00000034771.16	MGI:104635	Tle2	transducin-like enhancer of split 2	-0.763096	0.000589486	0.00251184	-0.0427801	0.845624	0.919436
ENSMUSG00000034780.7	MGI:1349403	B3galt1	UDP-Gal:betaGlcNAc beta 1,3-galactosyltransferase, polypeptide 1	-0.694134	6.11273e-06	4.70553e-05	-0.310514	0.042547	0.130529
ENSMUSG00000034818.18	MGI:2442333	Celf5	CUGBP, Elav-like family member 5	-0.595807	0.00270063	0.00937477	0.0113651	0.954346	0.978528
ENSMUSG00000034825.15	MGI:1925843	Nrip3	nuclear receptor interacting protein 3	-2.43033	1.69509e-08	2.96804e-07	-0.881084	0.0405962	0.126507
ENSMUSG00000034839.6	MGI:1914807	Larp6	La ribonucleoprotein domain family, member 6	-0.921554	7.802e-11	2.86771e-09	-0.3151	0.0238991	0.0861846
ENSMUSG00000034858.17	MGI:2387648	Fam214a	family with sequence similarity 214, member A	-0.608085	0.000501313	0.00218677	0.0191678	0.912485	0.957155
ENSMUSG00000034997.6	MGI:109521	Htr2a	5-hydroxytryptamine (serotonin) receptor 2A	-1.52545	0.000140386	0.000716432	-1.07815	0.00678498	0.0335771
ENSMUSG00000035045.18	MGI:2442133	Zc3h12b	zinc finger CCCH-type containing 12B	-1.14153	1.11397e-09	2.83876e-08	-0.576883	0.00193929	0.0128049
ENSMUSG00000035189.18	MGI:2443344	Ano4	anoctamin 4	-1.25866	2.4316e-05	0.00015611	-0.53041	0.0719654	0.190359
ENSMUSG00000035226.6	MGI:2674366	Rims4	regulating synaptic membrane exocytosis 4	-0.857449	4.49272e-07	4.91189e-06	-0.43778	0.00933295	0.0427296
ENSMUSG00000035236.18	MGI:2443716	Scai	suppressor of cancer cell invasion	-0.805179	7.35272e-05	0.000409031	-0.404355	0.0460546	0.13802
ENSMUSG00000035275.15	MGI:2443623	Raver2	ribonucleoprotein, PTB-binding 2	-1.34743	6.70131e-09	1.31909e-07	-0.287818	0.212768	0.401074
ENSMUSG00000035277.16	MGI:1097716	Arx	aristaless related homeobox	-0.684342	0.000578644	0.00247256	-0.174448	0.366575	0.569893
ENSMUSG00000035284.11	MGI:2444207	Vps13c	vacuolar protein sorting 13C	-0.658167	0.00195034	0.00707386	-0.0518317	0.807216	0.898647
ENSMUSG00000035390.17	MGI:2685946	Brsk1	BR serine/threonine kinase 1	-0.943106	7.88833e-11	2.88782e-09	-0.300327	0.0381207	0.120905
ENSMUSG00000035397.9	MGI:2153049	Klf16	Kruppel-like factor 16	-0.946801	3.29995e-06	2.76289e-05	-0.497445	0.0142338	0.0587356
ENSMUSG00000035504.17	MGI:1917585	Reep6	receptor accessory protein 6	-0.855158	7.20866e-05	0.000402651	-0.372812	0.0748702	0.195498
ENSMUSG00000035547.15	MGI:1100859	Capn5	calpain 5	-1.13624	2.55801e-09	5.80154e-08	-0.432579	0.02256	0.0827216
ENSMUSG00000035594.11	MGI:87889	Chrna5	cholinergic receptor, nicotinic, alpha polypeptide 5	-3.36993	2.61314e-08	4.30603e-07	-1.19524	0.0347248	0.112951
ENSMUSG00000035649.18	MGI:2442912	Zcchc7	zinc finger, CCHC domain containing 7	-0.708207	7.39458e-07	7.60538e-06	-0.111245	0.435505	0.633853
ENSMUSG00000035681.8	MGI:96668	Kcnc2	potassium voltage gated channel, Shaw-related subfamily, member 2	-3.50502	5.37888e-10	1.50807e-08	-0.805839	0.151377	0.319949
ENSMUSG00000035735.11	MGI:2677061	Dagla	diacylglycerol lipase, alpha	-1.05495	7.42453e-05	0.00041219	-0.104914	0.693477	0.82802
ENSMUSG00000035781.15	MGI:1924814	R3hdm4	R3H domain containing 4	-0.691897	5.74288e-05	0.000329366	-0.193703	0.259762	0.458749
ENSMUSG00000035847.16	MGI:96417	Ids	iduronate 2-sulfatase	-0.767529	0.000396859	0.00178099	-0.429465	0.0474135	0.14069
ENSMUSG00000035849.15	MGI:2442728	Krt222	keratin 222	-1.30927	4.73939e-07	5.14466e-06	-0.647132	0.0121314	0.0521739
ENSMUSG00000035864.15	MGI:99667	Syt1	synaptotagmin I	-1.29361	4.36349e-08	6.68792e-07	-0.683962	0.00378512	0.0214467
ENSMUSG00000035896.6	MGI:97919	Rnase1	ribonuclease, RNase A family, 1 (pancreatic)	-1.86137	0.000227948	0.00109405	-1.19127	0.00589799	0.0302783
ENSMUSG00000035933.6	MGI:2145130	Cog5	component of oligomeric golgi complex 5	-0.594799	4.99325e-05	0.000291432	-0.142553	0.331052	0.535355
ENSMUSG00000035934.17	MGI:2445415	Pknox2	Pbx/knotted 1 homeobox 2	-0.768093	4.21281e-06	3.40251e-05	-0.413337	0.0130779	0.0551491
ENSMUSG00000035954.11	MGI:1918006	Dock4	dedicator of cytokinesis 4	-1.26333	3.86943e-13	3.33327e-11	-0.489217	0.00487555	0.0260865
ENSMUSG00000035964.9	MGI:1915187	Tmem59l	transmembrane protein 59-like	-0.913652	3.12701e-07	3.61783e-06	-0.417289	0.0193865	0.0742741
ENSMUSG00000035984.15	MGI:1922783	Nme5	NME/NM23 family member 5	-0.650229	0.000291235	0.00135765	-0.111305	0.526431	0.708093
ENSMUSG00000036006.21	MGI:2444879	Ripor2	RHO family interacting cell polarization regulator 2	-0.945201	0.000100115	0.000533249	-0.561284	0.0206264	0.0776753
ENSMUSG00000036095.12	MGI:2442474	Dgkb	diacylglycerol kinase, beta	-1.45712	4.35548e-05	0.000258557	-0.200797	0.572895	0.744646
ENSMUSG00000036123.9	MGI:105064	Slc9a3	solute carrier family 9 (sodium/hydrogen exchanger), member 3	-1.8742	0.000141375	0.000721075	-0.0540324	0.902695	0.951537
ENSMUSG00000036242.16	MGI:1914669	Armh4	armadillo-like helical domain containing 4	-1.19223	4.3066e-07	4.74497e-06	-0.546043	0.0195656	0.0747316
ENSMUSG00000036278.8	MGI:2147583	Macrod1	mono-ADP ribosylhydrolase 1	-0.685548	0.00215144	0.00771144	-0.162441	0.464526	0.658604
ENSMUSG00000036304.15	MGI:2685625	Zdhhc23	zinc finger, DHHC domain containing 23	-1.08765	2.14148e-06	1.90586e-05	-0.529139	0.0208155	0.0781427
ENSMUSG00000036377.20	MGI:2444817	Cracd	capping protein inhibiting regulator of actin	-1.43888	5.86164e-07	6.19607e-06	-0.603956	0.0353091	0.114341
ENSMUSG00000036427.6	MGI:95797	Gpi1	glucose-6-phosphate isomerase 1	-0.630946	1.74304e-10	5.62947e-09	-0.312814	0.0015395	0.0107
ENSMUSG00000036437.7	MGI:104963	Npy1r	neuropeptide Y receptor Y1	-0.931293	0.0025037	0.0087947	-0.146718	0.633449	0.787666
ENSMUSG00000036492.13	MGI:2156378	Rnf39	ring finger protein 39	-1.91133	4.23445e-06	3.41697e-05	-0.308256	0.446012	0.643612
ENSMUSG00000036502.15	MGI:3045722	Tmem255a	transmembrane protein 255A	-1.46531	4.18128e-05	0.000249404	-0.699995	0.0486843	0.143539
ENSMUSG00000036564.18	MGI:2384590	Ndrg4	N-myc downstream regulated gene 4	-0.795011	0.00010212	0.000542134	-0.396415	0.0526724	0.152126
ENSMUSG00000036578.8	MGI:1889006	Fxyd7	FXYD domain-containing ion transport regulator 7	-2.02048	9.51616e-12	4.99872e-10	-0.371065	0.206995	0.393731
ENSMUSG00000036599.11	MGI:1929064	Chst12	carbohydrate sulfotransferase 12	-0.671088	5.78138e-06	4.48953e-05	-0.314414	0.0335813	0.110107
ENSMUSG00000036611.6	MGI:1914734	Eepd1	endonuclease/exonuclease/phosphatase family domain containing 1	-0.648076	0.000235078	0.00112356	-0.22376	0.203243	0.38915
ENSMUSG00000036617.18	MGI:95454	Etl4	enhancer trap locus 4	-2.16135	2.56353e-18	1.0415e-15	-0.324226	0.184038	0.364457
ENSMUSG00000036641.10	MGI:3039583	Ccdc148	coiled-coil domain containing 148	-1.04614	7.25997e-07	7.48097e-06	-0.449867	0.0296195	0.100733
ENSMUSG00000036712.16	MGI:1921506	Cyld	CYLD lysine 63 deubiquitinase	-0.910154	1.1928e-11	5.91439e-10	-0.199024	0.137039	0.297854
ENSMUSG00000036766.13	MGI:2152889	Dner	delta/notch-like EGF repeat containing	-0.655812	9.13742e-06	6.67238e-05	-0.194929	0.186163	0.36685
ENSMUSG00000036792.13	MGI:2138934	Mbd5	methyl-CpG binding domain protein 5	-0.647126	5.72336e-05	0.000328521	-0.22609	0.159118	0.330855
ENSMUSG00000036815.18	MGI:2442409	Dpp10	dipeptidylpeptidase 10	-2.01474	1.14301e-08	2.10204e-07	-1.0155	0.00345124	0.0198829
ENSMUSG00000036882.8	MGI:2673998	Arhgap33	Rho GTPase activating protein 33	-0.863314	0.00012575	0.000648745	-0.270297	0.228584	0.420909
ENSMUSG00000036902.12	MGI:1921763	Neto2	neuropilin (NRP) and tolloid (TLL)-like 2	-0.647062	0.000227708	0.00109348	0.0853271	0.625857	0.781451
ENSMUSG00000036959.16	MGI:2443910	Bcorl1	BCL6 co-repressor-like 1	-0.644499	2.14121e-07	2.62576e-06	-0.155349	0.207017	0.393741
ENSMUSG00000036966.16	MGI:2446175	Spryd3	SPRY domain containing 3	-0.647748	1.6879e-07	2.13416e-06	-0.152374	0.217547	0.406881
ENSMUSG00000037005.17	MGI:2180001	Xpnpep2	X-prolyl aminopeptidase (aminopeptidase P) 2, membrane-bound	-2.46851	0.00233622	0.00829244	-1.82698	0.013245	0.0557075
ENSMUSG00000037014.5	MGI:105372	Sstr4	somatostatin receptor 4	-1.2749	0.000434433	0.00193066	-0.638338	0.0755393	0.196776
ENSMUSG00000037022.4	MGI:1923805	Mmaa	methylmalonic aciduria (cobalamin deficiency) type A	-0.605326	1.4262e-06	1.34018e-05	-0.363504	0.0033465	0.0194378
ENSMUSG00000037032.17	MGI:107765	Apbb1	amyloid beta (A4) precursor protein-binding, family B, member 1	-0.614178	9.93246e-08	1.35295e-06	-0.258394	0.0248165	0.0885804
ENSMUSG00000037111.10	MGI:1920501	Setd7	SET domain containing (lysine methyltransferase) 7	-0.798142	2.82994e-09	6.28825e-08	-0.27358	0.0414808	0.128361
ENSMUSG00000037126.17	MGI:1920978	Psd	pleckstrin and Sec7 domain containing	-1.31267	1.36813e-07	1.78309e-06	-0.359576	0.148805	0.315636
ENSMUSG00000037138.19	MGI:106927	Aff3	AF4/FMR2 family, member 3	-0.681115	0.000122922	0.00063679	-0.308561	0.0810737	0.206447
ENSMUSG00000037151.9	MGI:2387182	Lrrc20	leucine rich repeat containing 20	-0.852489	1.53281e-07	1.96465e-06	-0.23677	0.143178	0.307556
ENSMUSG00000037172.15	MGI:2444256	Dennd11	DENN domain containing 11	-0.759058	2.04139e-05	0.000133847	-0.0301929	0.865045	0.931077
ENSMUSG00000037196.7	MGI:1916560	Pacrg	PARK2 co-regulated	-0.692758	3.39178e-10	1.01531e-08	-0.0204848	0.848408	0.920798
ENSMUSG00000037217.16	MGI:98460	Syn1	synapsin I	-0.708333	0.00119816	0.00463769	-0.172628	0.429684	0.629343
ENSMUSG00000037236.17	MGI:1298379	Matr3	matrin 3	-0.586963	4.44979e-06	3.5752e-05	-0.38052	0.0029204	0.0176272
ENSMUSG00000037259.16	MGI:2139080	Dzank1	double zinc ribbon and ankyrin repeat domains 1	-1.01774	2.52702e-07	3.02316e-06	-0.516743	0.00872488	0.0405968
ENSMUSG00000037316.10	MGI:1914634	Bag4	BCL2-associated athanogene 4	-0.836248	0.000687141	0.002863	-0.304209	0.216501	0.405681
ENSMUSG00000037363.10	MGI:2444979	Letm2	leucine zipper-EF-hand containing transmembrane protein 2	-0.750437	9.6903e-06	7.01262e-05	0.00332595	0.984178	0.992892
ENSMUSG00000037386.17	MGI:2152972	Rims2	regulating synaptic membrane exocytosis 2	-0.834257	8.92419e-08	1.23962e-06	-0.452684	0.00355643	0.0203863
ENSMUSG00000037492.17	MGI:2443497	Zmat4	zinc finger, matrin type 4	-1.31915	0.000446451	0.00197415	-0.485901	0.195055	0.378171
ENSMUSG00000037509.22	MGI:2442507	Arhgef4	Rho guanine nucleotide exchange factor (GEF) 4	-0.989623	7.61662e-09	1.47283e-07	-0.425593	0.0129167	0.0546408
ENSMUSG00000037536.15	MGI:1926188	Fbxo34	F-box protein 34	-0.786136	0.00052697	0.0022827	-0.311226	0.169648	0.345197
ENSMUSG00000037541.23	MGI:2671987	Shank2	SH3 and multiple ankyrin repeat domains 2	-0.589429	0.000425497	0.0018934	-0.260177	0.119583	0.270705
ENSMUSG00000037610.16	MGI:1919663	Kcnmb2	potassium large conductance calcium-activated channel, subfamily M, beta member 2	-2.21579	2.301e-05	0.000149157	-0.701027	0.152511	0.321423
ENSMUSG00000037624.16	MGI:109366	Kcnk2	potassium channel, subfamily K, member 2	-1.06256	9.27251e-07	9.21537e-06	-0.554192	0.0103721	0.0463401
ENSMUSG00000037653.8	MGI:2443804	Kctd8	potassium channel tetramerisation domain containing 8	-1.73276	4.24294e-07	4.68363e-06	-0.596827	0.0603211	0.167593
ENSMUSG00000037703.15	MGI:2656976	Lzts3	leucine zipper, putative tumor suppressor family member 3	-1.46317	1.33175e-05	9.18885e-05	-0.271182	0.419413	0.620498
ENSMUSG00000037708.17	MGI:3040687	Spag6	sperm associated antigen 6	-1.08821	0.00185738	0.00677974	-0.140566	0.685769	0.823218
ENSMUSG00000037709.14	MGI:1889842	Fam13a	family with sequence similarity 13, member A	-0.763277	0.000651395	0.00273442	-0.380829	0.0886779	0.220284
ENSMUSG00000037735.8	MGI:1919919	2810032G03Rik	RIKEN cDNA 2810032G03 gene	-0.731226	0.000829083	0.00336443	-0.429644	0.0474496	0.140762
ENSMUSG00000037771.12	MGI:1194488	Slc32a1	solute carrier family 32 (GABA vesicular transporter), member 1	-2.62775	6.01734e-06	4.64122e-05	-0.274501	0.634226	0.788158
ENSMUSG00000037826.6	MGI:2442111	Ppm1k	protein phosphatase 1K (PP2C domain containing)	-0.815832	6.47038e-08	9.40274e-07	-0.361671	0.0162221	0.0649991
ENSMUSG00000037855.16	MGI:2143676	Zfp365	zinc finger protein 365	-1.11042	4.83481e-11	1.93533e-09	-0.467338	0.00560963	0.0290963
ENSMUSG00000037940.18	MGI:2158925	Inpp4b	inositol polyphosphate-4-phosphatase, type II	-0.611048	1.02868e-05	7.35305e-05	-0.0621448	0.649905	0.798506
ENSMUSG00000037972.8	MGI:1276549	Snn	stannin	-1.14404	6.48219e-13	5.09288e-11	-0.422697	0.00778027	0.0371417
ENSMUSG00000037973.7	MGI:2685304	Itprid1	ITPR interacting domain containing 1	-2.16756	7.21484e-06	5.43193e-05	-0.570119	0.139578	0.301654
ENSMUSG00000037979.14	MGI:106485	Ccdc92	coiled-coil domain containing 92	-0.592516	0.000635678	0.00267829	-0.198627	0.251037	0.448246
ENSMUSG00000037984.10	MGI:106593	Neurod6	neurogenic differentiation 6	-3.55521	4.7284e-17	1.35055e-14	-0.717073	0.0894277	0.221619
ENSMUSG00000037994.15	MGI:2140077	Slc9b2	solute carrier family 9, subfamily B (NHA2, cation proton antiporter 2), member 2	-1.90893	3.30593e-07	3.78499e-06	-0.689147	0.0317247	0.10606
ENSMUSG00000037996.18	MGI:1923626	Slc24a2	solute carrier family 24 (sodium/potassium/calcium exchanger), member 2	-1.48536	7.92388e-11	2.89697e-09	-0.475851	0.0371889	0.118827
ENSMUSG00000038013.15	MGI:1924462	Wipf2	WAS/WASL interacting protein family, member 2	-0.785881	5.74784e-09	1.15209e-07	-0.377331	0.00507389	0.0269632
ENSMUSG00000038020.6	MGI:3611446	Rapgefl1	Rap guanine nucleotide exchange factor (GEF)-like 1	-1.07755	0.00133654	0.00508433	-0.184323	0.583091	0.751882
ENSMUSG00000038048.9	MGI:3646013	Cntnap5c	contactin associated protein-like 5C	-3.02984	3.38497e-09	7.34302e-08	-0.799009	0.111388	0.258034
ENSMUSG00000038064.8	MGI:1922927	Cldn22	claudin 22	-4.00368	1.6136e-09	3.86757e-08	-1.29065	0.0298754	0.101257
ENSMUSG00000038065.14	MGI:1915485	Mturn	maturin, neural progenitor differentiation regulator homolog (Xenopus)	-1.77452	2.21291e-12	1.42233e-10	-0.632362	0.0122229	0.0525108
ENSMUSG00000038119.16	MGI:1926387	Cdon	cell adhesion molecule-related/down-regulated by oncogenes	-0.942338	1.62618e-05	0.000109692	-0.116154	0.593516	0.759499
ENSMUSG00000038141.12	MGI:1924356	Tmem181a	transmembrane protein 181A	-0.826125	5.41839e-08	8.04833e-07	-0.349527	0.0207559	0.0780041
ENSMUSG00000038233.11	MGI:3041196	Gask1a	golgi associated kinase 1A	-0.847993	8.25679e-06	6.11069e-05	-0.144437	0.437696	0.635875
ENSMUSG00000038244.15	MGI:2444947	Mical2	microtubule associated monooxygenase, calponin and LIM domain containing 2	-1.27072	1.98616e-06	1.78267e-05	-0.494632	0.064101	0.174962
ENSMUSG00000038248.9	MGI:1924427	Sobp	sine oculis binding protein	-0.710319	0.000570559	0.00244296	-0.387359	0.0600166	0.167075
ENSMUSG00000038257.11	MGI:95749	Glra3	glycine receptor, alpha 3 subunit	-2.95986	0.000102016	0.000541793	0.252951	0.722528	0.84564
ENSMUSG00000038295.15	MGI:2685420	Atg9b	autophagy related 9B	-1.67693	0.000104733	0.000554185	-0.854064	0.0312294	0.104699
ENSMUSG00000038319.15	MGI:1341722	Kcnh2	potassium voltage-gated channel, subfamily H (eag-related), member 2	-1.26466	1.75122e-07	2.20167e-06	-0.152467	0.52011	0.70347
ENSMUSG00000038323.4	MGI:1920717	1700066M21Rik	RIKEN cDNA 1700066M21 gene	-0.6035	2.03705e-06	1.82287e-05	-0.295766	0.0194489	0.0744185
ENSMUSG00000038347.16	MGI:98641	Tcte2	t-complex-associated testis expressed 2	-0.688078	0.000209697	0.00101936	0.114211	0.524748	0.706857
ENSMUSG00000038354.14	MGI:2442590	Ankrd35	ankyrin repeat domain 35	-1.04662	1.55823e-05	0.000105741	0.105402	0.658879	0.804629
ENSMUSG00000038370.7	MGI:1913675	Pcp4l1	Purkinje cell protein 4-like 1	-0.697325	1.55352e-07	1.98589e-06	-0.174127	0.186735	0.367455
ENSMUSG00000038446.9	MGI:1918963	Cdc40	cell division cycle 40	-0.92576	8.13866e-06	6.03793e-05	-0.375634	0.0699931	0.186801
ENSMUSG00000038453.18	MGI:1933179	Srcin1	SRC kinase signaling inhibitor 1	-0.833412	2.59538e-12	1.63164e-10	-0.289803	0.014717	0.0602131
ENSMUSG00000038473.15	MGI:1917979	Nos1ap	nitric oxide synthase 1 (neuronal) adaptor protein	-1.32798	1.03726e-14	1.55419e-12	-0.493921	0.00381425	0.0215681
ENSMUSG00000038485.7	MGI:2651588	Socs7	suppressor of cytokine signaling 7	-0.665088	5.41367e-08	8.04833e-07	-0.346643	0.00455173	0.0247856
ENSMUSG00000038486.10	MGI:1927139	Sv2a	synaptic vesicle glycoprotein 2 a	-0.693887	2.06808e-07	2.5429e-06	-0.234807	0.0785797	0.201917
ENSMUSG00000038630.9	MGI:3510405	Zkscan16	zinc finger with KRAB and SCAN domains 16	-1.02681	0.000607551	0.0025792	-0.351362	0.239388	0.434284
ENSMUSG00000038679.17	MGI:1927616	Trps1	transcriptional repressor GATA binding 1	-1.04835	7.42503e-07	7.61955e-06	-0.0936875	0.657203	0.803408
ENSMUSG00000038777.20	MGI:1338032	Sema6c	sema domain, transmembrane domain (TM), and cytoplasmic domain, (semaphorin) 6C	-1.08181	9.53708e-06	6.92733e-05	-0.128506	0.596399	0.761273
ENSMUSG00000038793.9	MGI:107405	Lefty1	left right determination factor 1	-2.2145	6.34694e-06	4.85584e-05	-0.571009	0.237554	0.431967
ENSMUSG00000038807.20	MGI:3028623	Rap1gap2	RAP1 GTPase activating protein 2	-0.803237	0.00168391	0.00623285	-0.369499	0.148171	0.314818
ENSMUSG00000038822.16	MGI:2446110	Hace1	HECT domain and ankyrin repeat containing, E3 ubiquitin protein ligase 1	-0.884334	4.66245e-06	3.72724e-05	-0.486587	0.0115847	0.05038
ENSMUSG00000038967.14	MGI:1343087	Pdk2	pyruvate dehydrogenase kinase, isoenzyme 2	-0.652724	1.17654e-05	8.25718e-05	-0.198304	0.181586	0.361174
ENSMUSG00000038970.8	MGI:3036247	Lmtk2	lemur tyrosine kinase 2	-0.620892	6.19353e-06	4.75305e-05	-0.342291	0.0125072	0.0533845
ENSMUSG00000038976.13	MGI:2387581	Ppp1r9b	protein phosphatase 1, regulatory subunit 9B	-1.0364	8.04193e-08	1.13665e-06	-0.297675	0.123175	0.27641
ENSMUSG00000039087.18	MGI:2443664	Rreb1	ras responsive element binding protein 1	-1.16807	0.000291656	0.00135906	-0.0807505	0.802078	0.894671
ENSMUSG00000039145.17	MGI:2442190	Camk1d	calcium/calmodulin-dependent protein kinase ID	-1.98151	1.70201e-11	7.95047e-10	-0.472274	0.108393	0.253294
ENSMUSG00000039156.20	MGI:2151156	Stim2	stromal interaction molecule 2	-1.20015	1.03135e-06	1.01324e-05	-0.53008	0.030794	0.103685
ENSMUSG00000039166.17	MGI:1859150	Akap7	A kinase (PRKA) anchor protein 7	-0.957505	3.88845e-05	0.000234243	-0.320751	0.167051	0.341404
ENSMUSG00000039257.12	MGI:1914525	Vstm2b	V-set and transmembrane domain containing 2B	-1.27284	0.000190795	0.00093874	-0.749519	0.0272463	0.0947016
ENSMUSG00000039375.17	MGI:1924662	Wdr17	WD repeat domain 17	-1.18734	1.84762e-11	8.47186e-10	-0.495231	0.00451034	0.0245943
ENSMUSG00000039478.16	MGI:1925756	Micu3	mitochondrial calcium uptake family, member 3	-0.721425	3.16608e-06	2.66382e-05	-0.418692	0.00672355	0.0333486
ENSMUSG00000039485.9	MGI:106393	Tspyl4	TSPY-like 4	-0.726466	6.14184e-06	4.72234e-05	-0.441564	0.00597248	0.0305413
ENSMUSG00000039519.7	MGI:104978	Cyp7b1	cytochrome P450, family 7, subfamily b, polypeptide 1	-0.760369	3.35491e-05	0.000206177	-0.272482	0.137498	0.2985
ENSMUSG00000039546.10	MGI:2685419	Ajap1	adherens junction associated protein 1	-1.19982	8.20461e-16	1.66645e-13	-0.467271	0.00148983	0.0104362
ENSMUSG00000039578.18	MGI:3045354	Ccser1	coiled-coil serine rich 1	-0.738037	1.17772e-06	1.13869e-05	-0.26863	0.0726633	0.191664
ENSMUSG00000039579.16	MGI:1933206	Grin3a	glutamate receptor ionotropic, NMDA3A	-0.818186	0.0020707	0.00745615	-0.817627	0.00200635	0.0131508
ENSMUSG00000039607.18	MGI:2444477	Rbms3	RNA binding motif, single stranded interacting protein	-1.14777	5.40411e-08	8.04833e-07	-0.3541	0.0869006	0.216967
ENSMUSG00000039629.15	MGI:2444363	Strip2	striatin interacting protein 2	-2.29707	3.8165e-08	5.95948e-07	-1.03015	0.0132553	0.0557409
ENSMUSG00000039634.13	MGI:2444707	Zfp189	zinc finger protein 189	-1.11214	2.8637e-05	0.000179809	-0.539433	0.0417174	0.128911
ENSMUSG00000039652.17	MGI:2443075	Cpeb3	cytoplasmic polyadenylation element binding protein 3	-1.14801	6.9552e-08	1.00006e-06	-0.457346	0.0309985	0.104185
ENSMUSG00000039697.17	MGI:2444847	Ncoa7	nuclear receptor coactivator 7	-0.91225	3.48093e-06	2.88534e-05	-0.381343	0.0516353	0.149959
ENSMUSG00000039714.10	MGI:2384571	Cplx3	complexin 3	-3.01177	4.09538e-10	1.18912e-08	-1.03039	0.00857255	0.0400647
ENSMUSG00000039747.12	MGI:2443195	Orai2	ORAI calcium release-activated calcium modulator 2	-1.05802	6.89471e-05	0.000387483	-0.423815	0.110848	0.257007
ENSMUSG00000039763.11	MGI:2181053	Dnajc28	DnaJ heat shock protein family (Hsp40) member C28	-0.603652	1.93053e-07	2.39851e-06	-0.131779	0.245842	0.442387
ENSMUSG00000039809.11	MGI:2386030	Gabbr2	gamma-aminobutyric acid (GABA) B receptor, 2	-0.755387	0.00128955	0.0049371	-0.463883	0.0480666	0.142084
ENSMUSG00000040009.7	MGI:95780	Gnaz	guanine nucleotide binding protein, alpha z subunit	-0.659672	9.99325e-05	0.000532792	-0.199711	0.237054	0.431514
ENSMUSG00000040046.15	MGI:98796	Tph1	tryptophan hydroxylase 1	-1.9913	0.0009834	0.0039006	-1.20395	0.0498205	0.146012
ENSMUSG00000040097.17	MGI:2442638	Flywch1	FLYWCH-type zinc finger 1	-0.715801	3.50924e-07	3.98275e-06	-0.20154	0.150964	0.319343
ENSMUSG00000040113.15	MGI:2685053	Mettl11b	methyltransferase like 11B	-2.28555	1.46847e-08	2.62316e-07	-0.611254	0.0819042	0.207926
ENSMUSG00000040125.5	MGI:2441758	Gpr26	G protein-coupled receptor 26	-1.79314	3.48043e-10	1.03395e-08	-0.610856	0.0320671	0.106715
ENSMUSG00000040133.3	MGI:2685858	Gpr176	G protein-coupled receptor 176	-0.606992	0.000947326	0.00377499	-0.520162	0.00442962	0.0242911
ENSMUSG00000040136.11	MGI:1352629	Abcc8	ATP-binding cassette, sub-family C (CFTR/MRP), member 8	-1.60984	8.62985e-07	8.65827e-06	-0.6561	0.0446051	0.135023
ENSMUSG00000040181.15	MGI:1310002	Fmo1	flavin containing monooxygenase 1	-0.800991	0.00193578	0.0070322	-0.240182	0.356383	0.559474
ENSMUSG00000040209.13	MGI:2180715	Zfp704	zinc finger protein 704	-0.611831	2.32085e-07	2.80589e-06	-0.262631	0.0261538	0.0919244
ENSMUSG00000040265.17	MGI:1341299	Dnm3	dynamin 3	-1.29457	6.35088e-10	1.73447e-08	-0.64452	0.00200396	0.0131442
ENSMUSG00000040372.3	MGI:2135884	Gpr63	G protein-coupled receptor 63	-1.85932	4.45142e-08	6.81127e-07	-0.88304	0.00827443	0.0389516
ENSMUSG00000040389.16	MGI:2139593	Wdr47	WD repeat domain 47	-0.72851	4.52516e-07	4.93752e-06	-0.325393	0.0240158	0.0865483
ENSMUSG00000040420.16	MGI:1344366	Cdh18	cadherin 18	-1.33381	1.28804e-05	8.92544e-05	-0.449866	0.125523	0.280013
ENSMUSG00000040495.5	MGI:88399	Chrm4	cholinergic receptor, muscarinic 4	-2.5695	7.11828e-14	7.68438e-12	-0.853576	0.00601889	0.0307027
ENSMUSG00000040536.16	MGI:1916602	Necab1	N-terminal EF-hand calcium binding protein 1	-1.9878	6.36057e-05	0.000360867	-0.556191	0.261354	0.460129
ENSMUSG00000040537.18	MGI:1340046	Adam22	a disintegrin and metallopeptidase domain 22	-0.648198	7.06006e-05	0.000395479	-0.181306	0.265891	0.464995
ENSMUSG00000040591.19	MGI:1915079	1110051M20Rik	RIKEN cDNA 1110051M20 gene	-0.594702	4.83738e-08	7.32014e-07	-0.241843	0.0256759	0.0907171
ENSMUSG00000040712.17	MGI:2135957	Camta2	calmodulin binding transcription activator 2	-1.08852	5.54846e-07	5.90831e-06	-0.28804	0.185114	0.365502
ENSMUSG00000040724.6	MGI:96659	Kcna2	potassium voltage-gated channel, shaker-related subfamily, member 2	-0.797705	8.84428e-08	1.23039e-06	-0.366105	0.0139738	0.0580012
ENSMUSG00000040746.16	MGI:1917760	Rnf167	ring finger protein 167	-0.62365	9.41364e-08	1.29944e-06	-0.178506	0.12571	0.280172
ENSMUSG00000040785.20	MGI:1276539	Ttc3	tetratricopeptide repeat domain 3	-0.804171	1.71868e-05	0.000115421	-0.317531	0.0895586	0.221807
ENSMUSG00000040797.17	MGI:2677208	Iqsec3	IQ motif and Sec7 domain 3	-0.772434	7.4381e-05	0.00041254	-0.0480573	0.805043	0.897308
ENSMUSG00000040836.16	MGI:2685054	Gpr161	G protein-coupled receptor 161	-2.13944	1.65974e-06	1.52462e-05	-1.19926	0.00703421	0.034477
ENSMUSG00000040855.16	MGI:2663511	Reps2	RALBP1 associated Eps domain containing protein 2	-1.425	9.00774e-06	6.59174e-05	-0.405526	0.206102	0.392832
ENSMUSG00000040907.16	MGI:88107	Atp1a3	ATPase, Na+/K+ transporting, alpha 3 polypeptide	-0.716703	5.40735e-05	0.000312871	-0.332362	0.0611432	0.16929
ENSMUSG00000041020.15	MGI:1917474	Map7d2	MAP7 domain containing 2	-0.711597	1.90141e-05	0.000125721	-0.410441	0.0134862	0.0564945
ENSMUSG00000041096.14	MGI:106244	Tspyl2	TSPY-like 2	-0.60315	2.95721e-09	6.50776e-08	-0.257756	0.0109218	0.0482046
ENSMUSG00000041115.17	MGI:3528396	Iqsec2	IQ motif and Sec7 domain 2	-0.806367	0.000778889	0.00318525	-0.162091	0.499281	0.687509
ENSMUSG00000041199.4	MGI:1919186	Rpusd1	RNA pseudouridylate synthase domain containing 1	-0.663108	4.56428e-05	0.000269261	-0.19936	0.218874	0.408255
ENSMUSG00000041216.16	MGI:1921688	Clvs1	clavesin 1	-0.768877	9.4622e-05	0.000508782	-0.509329	0.00955104	0.0434633
ENSMUSG00000041225.17	MGI:1922665	Arhgap12	Rho GTPase activating protein 12	-0.984423	7.31129e-05	0.000407553	-0.318238	0.199362	0.383858
ENSMUSG00000041245.14	MGI:2652875	Wnk3	WNK lysine deficient protein kinase 3	-0.853846	1.52121e-06	1.41539e-05	-0.487601	0.00577429	0.0297769
ENSMUSG00000041263.15	MGI:1919546	Rusc1	RUN and SH3 domain containing 1	-0.647501	4.99749e-06	3.95701e-05	-0.342112	0.0155382	0.0628575
ENSMUSG00000041351.17	MGI:109338	Rap1gap	Rap1 GTPase-activating protein	-0.612489	1.27839e-08	2.31682e-07	-0.242529	0.0241002	0.0867613
ENSMUSG00000041439.16	MGI:1922925	Mfsd6	major facilitator superfamily domain containing 6	-0.682644	3.13359e-07	3.62238e-06	-0.200153	0.132846	0.291401
ENSMUSG00000041534.10	MGI:97878	Rbp3	retinol binding protein 3, interstitial	-4.91791	0.00020502	0.00099905	0.972525	0.294119	0.497139
ENSMUSG00000041571.11	MGI:1100878	Selenow	selenoprotein W	-0.758207	8.24799e-09	1.57603e-07	-0.412189	0.00172221	0.0116893
ENSMUSG00000041592.17	MGI:2443847	Sdk2	sidekick cell adhesion molecule 2	-0.80209	9.65737e-06	6.99802e-05	-0.496744	0.00556291	0.0289288
ENSMUSG00000041608.9	MGI:1321386	Entpd3	ectonucleoside triphosphate diphosphohydrolase 3	-1.19667	0.000821982	0.00333957	-0.517122	0.143554	0.308041
ENSMUSG00000041609.17	MGI:1922915	Bicdl1	BICD family like cargo adaptor 1	-0.594542	0.000154457	0.000778673	-0.162388	0.300037	0.503328
ENSMUSG00000041617.11	MGI:1919565	Ccdc74a	coiled-coil domain containing 74A	-1.03287	4.96039e-07	5.3568e-06	0.00517823	0.97969	0.991067
ENSMUSG00000041700.10	MGI:1891214	Lhfpl1	lipoma HMGIC fusion partner-like 1	-3.53026	3.00695e-06	2.5487e-05	-0.928024	0.0910992	0.224432
ENSMUSG00000041708.13	MGI:106316	Mpped1	metallophosphoesterase domain containing 1	-2.77111	2.62797e-05	0.000166765	-1.19096	0.0705399	0.187594
ENSMUSG00000041773.9	MGI:109610	Enc1	ectodermal-neural cortex 1	-0.989031	3.73282e-07	4.18797e-06	-0.134305	0.490047	0.680209
ENSMUSG00000041777.13	MGI:1914185	Cir1	corepressor interacting with RBPJ, 1	-0.589109	6.02995e-07	6.34951e-06	-0.0527742	0.653118	0.800613
ENSMUSG00000041794.14	MGI:2384407	Myrip	myosin VIIA and Rab interacting protein	-1.2149	3.30434e-08	5.27693e-07	-0.340476	0.120029	0.271333
ENSMUSG00000041852.16	MGI:108399	Tcf20	transcription factor 20	-0.654988	3.12596e-05	0.000193658	-0.399321	0.0110205	0.0485335
ENSMUSG00000041911.4	MGI:94901	Dlx1	distal-less homeobox 1	-1.99009	0.000229853	0.00110204	-0.413739	0.435877	0.634243
ENSMUSG00000041957.16	MGI:1914701	Pkp2	plakophilin 2	-2.34235	1.63552e-11	7.67908e-10	-0.93097	0.00696397	0.0342647
ENSMUSG00000041986.17	MGI:3583900	Elmod1	ELMO/CED-12 domain containing 1	-1.11614	8.79166e-05	0.000477078	-0.556566	0.0504329	0.147356
ENSMUSG00000042066.17	MGI:1916125	Tmcc2	transmembrane and coiled-coil domains 2	-0.801904	0.000624519	0.00264142	-0.0954418	0.68369	0.821912
ENSMUSG00000042097.18	MGI:1306812	Zfp239	zinc finger protein 239	-0.712355	6.36836e-05	0.000361234	-0.364196	0.0402988	0.125772
ENSMUSG00000042156.17	MGI:1914311	Dzip1	DAZ interacting protein 1	-1.31694	8.46718e-08	1.18515e-06	-0.280016	0.253107	0.450435
ENSMUSG00000042249.12	MGI:87941	Grk3	G protein-coupled receptor kinase 3	-1.13602	1.40817e-07	1.82736e-06	-0.488479	0.0232533	0.0845309
ENSMUSG00000042272.18	MGI:1916262	Sestd1	SEC14 and spectrin domains 1	-0.777219	3.35327e-08	5.34263e-07	-0.343179	0.0142438	0.0587569
ENSMUSG00000042292.19	MGI:2384495	Mrtfa	myocardin related transcription factor A	-0.772534	0.000225831	0.0010858	-0.251047	0.230264	0.423159
ENSMUSG00000042298.19	MGI:1920045	Ttc19	tetratricopeptide repeat domain 19	-0.774729	1.28563e-06	1.22658e-05	-0.482858	0.00247815	0.015523
ENSMUSG00000042345.16	MGI:1926074	Ubash3a	ubiquitin associated and SH3 domain containing, A	-3.46328	3.56538e-08	5.61855e-07	-0.54718	0.211572	0.399591
ENSMUSG00000042348.11	MGI:2442308	Arl15	ADP-ribosylation factor-like 15	-1.15803	1.96678e-07	2.43583e-06	-0.537324	0.0154387	0.0625294
ENSMUSG00000042385.15	MGI:1298232	Gzmk	granzyme K	-3.7921	0.000573154	0.00245178	-1.15172	0.037492	0.119524
ENSMUSG00000042425.19	MGI:3646547	Frmpd3	FERM and PDZ domain containing 3	-1.70199	3.33441e-10	1.00252e-08	-0.445192	0.0966343	0.233862
ENSMUSG00000042429.9	MGI:99401	Adora1	adenosine A1 receptor	-0.767992	1.48513e-08	2.64774e-07	-0.215703	0.11137	0.258017
ENSMUSG00000042453.15	MGI:103022	Reln	reelin	-1.68077	3.27485e-18	1.28281e-15	-0.331055	0.083982	0.211747
ENSMUSG00000042505.7	MGI:1913288	Sdhaf3	succinate dehydrogenase complex assembly factor 3	-0.72918	4.60967e-09	9.52503e-08	-0.317327	0.00875561	0.0406908
ENSMUSG00000042581.15	MGI:2443925	Thsd7b	thrombospondin, type I, domain containing 7B	-1.20346	0.000398624	0.00178775	0.0797023	0.81125	0.90083
ENSMUSG00000042589.19	MGI:107321	Cux2	cut-like homeobox 2	-1.22398	9.95102e-08	1.35413e-06	-0.0789503	0.724887	0.846506
ENSMUSG00000042671.13	MGI:108408	Rgs8	regulator of G-protein signaling 8	-1.20436	4.8153e-05	0.000282368	-0.0217604	0.941386	0.972493
ENSMUSG00000042686.6	MGI:1891495	Jph1	junctophilin 1	-1.30592	0.000189824	0.000934801	-0.833275	0.017215	0.067936
ENSMUSG00000042743.14	MGI:2444615	Sgtb	small glutamine-rich tetratricopeptide repeat (TPR)-containing, beta	-0.923539	2.521e-07	3.01728e-06	-0.411344	0.0213881	0.0797195
ENSMUSG00000042744.17	MGI:3647820	Hectd4	HECT domain E3 ubiquitin protein ligase 4	-0.687226	0.000104673	0.00055397	-0.115596	0.513805	0.698348
ENSMUSG00000042761.15	MGI:3609239	Mrap2	melanocortin 2 receptor accessory protein 2	-2.35931	2.14104e-07	2.62576e-06	-0.960634	0.0146567	0.0600274
ENSMUSG00000042766.18	MGI:2673000	Trim46	tripartite motif-containing 46	-0.632577	0.00057548	0.00246096	-0.0767814	0.675589	0.815926
ENSMUSG00000042797.10	MGI:1913583	Aqp11	aquaporin 11	-1.15799	8.98391e-07	8.96244e-06	-0.635001	0.00660934	0.032959
ENSMUSG00000042807.16	MGI:2685817	Hecw2	HECT, C2 and WW domain containing E3 ubiquitin protein ligase 2	-0.640116	0.000521689	0.00226197	-0.532668	0.003743	0.021243
ENSMUSG00000042817.16	MGI:95559	Flt3	FMS-like tyrosine kinase 3	-1.02624	8.71841e-05	0.000473853	-0.569871	0.0264603	0.0927437
ENSMUSG00000042938.9	MGI:3651328	Gm14117	predicted gene 14117	-0.780891	6.57203e-06	5.00147e-05	-0.474074	0.00346455	0.0199452
ENSMUSG00000042988.11	MGI:1924833	Notum	notum palmitoleoyl-protein carboxylesterase	-1.05221	1.942e-05	0.000128127	0.0030761	0.988893	0.995389
ENSMUSG00000043004.14	MGI:102705	Gng2	guanine nucleotide binding protein (G protein), gamma 2	-1.0011	1.84538e-06	1.66998e-05	-0.406334	0.0527896	0.152415
ENSMUSG00000043013.11	MGI:1196423	Onecut1	one cut domain, family member 1	-1.62621	0.000974958	0.00387159	-1.21657	0.0139542	0.0579467
ENSMUSG00000043110.3	MGI:2445154	Lrrn4	leucine rich repeat neuronal 4	-2.17697	4.54729e-07	4.95772e-06	-0.944096	0.012403	0.053095
ENSMUSG00000043165.8	MGI:96816	Lor	loricrin	-1.40361	5.07496e-07	5.4635e-06	-0.757771	0.00417942	0.0232533
ENSMUSG00000043241.15	MGI:2449307	Upf2	UPF2 regulator of nonsense transcripts homolog (yeast)	-0.687256	7.8325e-07	7.95729e-06	-0.254092	0.0672905	0.181604
ENSMUSG00000043346.10	MGI:3643504	Gm6741	predicted gene 6741	-0.716186	0.00102845	0.00405407	-0.513466	0.0159703	0.0642365
ENSMUSG00000043384.16	MGI:1917418	Gprasp1	G protein-coupled receptor associated sorting protein 1	-0.667736	0.000153539	0.000774617	-0.398963	0.0236511	0.085529
ENSMUSG00000043419.12	MGI:1915359	Rnf227	ring finger protein 227	-0.811656	1.09852e-05	7.77527e-05	-0.419504	0.0225754	0.0827466
ENSMUSG00000043441.6	MGI:2443628	Gpr149	G protein-coupled receptor 149	-1.57445	0.00163646	0.00607519	-1.02248	0.0243216	0.08731
ENSMUSG00000043460.8	MGI:3608416	Elfn2	leucine rich repeat and fibronectin type III, extracellular 2	-1.31806	6.00047e-09	1.19313e-07	-0.653688	0.00387982	0.0218289
ENSMUSG00000043463.7	MGI:2442454	Rab9b	RAB9B, member RAS oncogene family	-1.07094	1.18785e-08	2.17283e-07	-0.369391	0.0474087	0.14069
ENSMUSG00000043556.11	MGI:3052506	Fbxl7	F-box and leucine-rich repeat protein 7	-1.16071	9.1795e-06	6.69776e-05	-0.685154	0.007932	0.0376973
ENSMUSG00000043557.17	MGI:1922012	Mdga1	MAM domain containing glycosylphosphatidylinositol anchor 1	-1.91393	1.16506e-07	1.55449e-06	-0.546204	0.129535	0.28628
ENSMUSG00000043602.6	MGI:99177	Zfp3	zinc finger protein 3	-0.613318	0.000190276	0.000936355	-0.40006	0.0145964	0.059811
ENSMUSG00000043614.14	MGI:2159402	Vps37d	vacuolar protein sorting 37D	-0.671571	0.000175401	0.000872235	0.129347	0.46182	0.65675
ENSMUSG00000043673.12	MGI:1098804	Kcns3	potassium voltage-gated channel, delayed-rectifier, subfamily S, member 3	-1.93026	6.8273e-13	5.31831e-11	-0.421551	0.0968406	0.234196
ENSMUSG00000043687.17	MGI:1916168	1190005I06Rik	RIKEN cDNA 1190005I06 gene	-0.863592	4.07971e-05	0.000244035	-0.0502041	0.809602	0.899761
ENSMUSG00000043850.16	MGI:2388124	Clrn1	clarin 1	-1.69101	0.00237772	0.00841142	-1.28117	0.0100919	0.0453157
ENSMUSG00000043929.17	MGI:1923400	Klhl15	kelch-like 15	-0.604672	2.68179e-05	0.000169709	-0.348494	0.0145463	0.0596568
ENSMUSG00000043999.7	MGI:2441843	Gpr75	G protein-coupled receptor 75	-0.710625	2.01082e-05	0.000132064	-0.186176	0.259158	0.45802
ENSMUSG00000044005.14	MGI:2143539	Gls2	glutaminase 2 (liver, mitochondrial)	-0.750317	0.000126383	0.000651762	-0.146673	0.452586	0.6488
ENSMUSG00000044024.17	MGI:1918044	Rell2	RELT-like 2	-1.17142	4.37963e-14	5.3137e-12	-0.414007	0.00710045	0.0347098
ENSMUSG00000044164.3	MGI:3045355	Rnf182	ring finger protein 182	-0.895119	2.45037e-07	2.9431e-06	-0.265057	0.124593	0.27861
ENSMUSG00000044288.7	MGI:104615	Cnr1	cannabinoid receptor 1 (brain)	-2.56356	2.034e-11	9.16594e-10	-0.734808	0.0540843	0.155049
ENSMUSG00000044349.17	MGI:2441845	Snhg11	small nucleolar RNA host gene 11	-1.67901	3.05858e-08	4.94785e-07	-0.525169	0.0831389	0.21035
ENSMUSG00000044352.7	MGI:2687280	Sowaha	sosondowah ankyrin repeat domain family member A	-1.71861	3.94212e-07	4.39046e-06	-0.831638	0.0140405	0.0581981
ENSMUSG00000044365.16	MGI:2442112	Cxxc4	CXXC finger 4	-0.789501	0.000653441	0.00274133	-0.544003	0.0173928	0.0684353
ENSMUSG00000044461.7	MGI:2444716	Shisa2	shisa family member 2	-2.08217	1.07767e-09	2.75908e-08	-0.330456	0.304867	0.508167
ENSMUSG00000044465.20	MGI:1921599	Fam160a2	family with sequence similarity 160, member A2	-0.606282	1.78515e-07	2.23916e-06	-0.267963	0.0206897	0.0778039
ENSMUSG00000044633.5	MGI:2445145	B530045E10Rik	RIKEN cDNA B530045E10 gene	-2.34923	0.0015181	0.00568043	-0.640242	0.324321	0.528323
ENSMUSG00000044647.17	MGI:1925021	Csrnp3	cysteine-serine-rich nuclear protein 3	-0.722051	0.000614009	0.00260379	-0.460214	0.0288233	0.098822
ENSMUSG00000044667.13	MGI:106530	Plppr4	phospholipid phosphatase related 4	-0.949668	1.15243e-05	8.10041e-05	-0.669023	0.00199789	0.0131233
ENSMUSG00000044726.9	MGI:2447772	Erich5	glutamate rich 5	-2.5128	0.000566536	0.00242884	-0.665944	0.342087	0.546098
ENSMUSG00000044787.8	MGI:3045340	Spata32	spermatogenesis associated 32	-1.49695	0.00127357	0.00488615	-0.769113	0.045502	0.136808
ENSMUSG00000044847.14	MGI:1919540	Lsm11	U7 snRNP-specific Sm-like protein LSM11	-1.60434	2.94651e-06	2.50522e-05	-1.06334	0.0018721	0.0124708
ENSMUSG00000044912.12	MGI:2673872	Syt16	synaptotagmin XVI	-0.990672	5.81671e-06	4.51314e-05	-0.673012	0.00203472	0.0132689
ENSMUSG00000045010.15	MGI:3646776	Gm4779	predicted gene 4779	-2.27466	0.00164807	0.00611257	-0.772492	0.230964	0.424219
ENSMUSG00000045092.9	MGI:1096355	S1pr1	sphingosine-1-phosphate receptor 1	-0.6697	2.53406e-07	3.02894e-06	-0.357395	0.00590875	0.0303207
ENSMUSG00000045174.11	MGI:3026939	Amer3	APC membrane recruitment 3	-0.913974	0.00146443	0.00550517	-0.744232	0.00954149	0.0434445
ENSMUSG00000045180.14	MGI:107194	Shroom2	shroom family member 2	-1.27474	1.24833e-09	3.11673e-08	-0.126217	0.546283	0.723177
ENSMUSG00000045215.18	MGI:2685175	Asxl3	ASXL transcriptional regulator 3	-0.783942	0.000152477	0.000769682	-0.246566	0.231905	0.425477
ENSMUSG00000045441.6	MGI:1924785	Gprin3	GPRIN family member 3	-3.55875	2.55409e-12	1.61739e-10	-1.03056	0.0336272	0.110216
ENSMUSG00000045589.8	MGI:2442704	Frrs1l	ferric-chelate reductase 1 like	-0.731695	0.00165222	0.00612628	-0.392957	0.091016	0.224376
ENSMUSG00000045613.10	MGI:88397	Chrm2	cholinergic receptor, muscarinic 2, cardiac	-2.02995	4.67193e-06	3.73077e-05	-0.911919	0.0267928	0.0935958
ENSMUSG00000045667.15	MGI:2442764	Smtnl2	smoothelin-like 2	-1.36078	0.000707606	0.00293621	0.540622	0.177538	0.35594
ENSMUSG00000045763.9	MGI:1917600	Basp1	brain abundant, membrane attached signal protein 1	-0.599841	0.000367305	0.00166389	-0.22221	0.186552	0.367247
ENSMUSG00000045790.11	MGI:2685293	Ccdc149	coiled-coil domain containing 149	-0.977585	2.16171e-10	6.8288e-09	-0.36598	0.0168691	0.0668341
ENSMUSG00000045929.9	MGI:5313162	Gm20715	predicted gene 20715	-1.95956	3.92697e-08	6.11109e-07	-0.389574	0.230432	0.423404
ENSMUSG00000045967.12	MGI:2441697	Gpr158	G protein-coupled receptor 158	-1.32302	4.05284e-06	3.29466e-05	-0.561178	0.050315	0.147067
ENSMUSG00000045991.20	MGI:1891408	Onecut2	one cut domain, family member 2	-1.19439	0.000290464	0.00135497	-0.586865	0.0734566	0.193192
ENSMUSG00000045994.18	MGI:1924148	B3gat1	beta-1,3-glucuronyltransferase 1 (glucuronosyltransferase P)	-2.01356	1.26193e-18	5.96587e-16	-0.727734	0.00142485	0.0100661
ENSMUSG00000046159.17	MGI:88398	Chrm3	cholinergic receptor, muscarinic 3, cardiac	-2.24438	4.39594e-15	7.44054e-13	-0.706729	0.0129504	0.0547555
ENSMUSG00000046178.4	MGI:107492	Nxph1	neurexophilin 1	-1.26532	1.28789e-09	3.19584e-08	-0.644717	0.00163434	0.0112228
ENSMUSG00000046219.10	MGI:2442283	C230012O17Rik	RIKEN cDNA C230012O17 gene	-2.30596	9.43268e-09	1.77032e-07	-0.336678	0.332818	0.536891
ENSMUSG00000046230.12	MGI:2444304	Vps13a	vacuolar protein sorting 13A	-0.815607	1.24098e-05	8.63645e-05	-0.375387	0.0438474	0.133485
ENSMUSG00000046318.17	MGI:2445053	Ccbe1	collagen and calcium binding EGF domains 1	-2.75245	3.38978e-07	3.86317e-06	-0.77484	0.149228	0.316422
ENSMUSG00000046329.15	MGI:1914222	Slc25a23	solute carrier family 25 (mitochondrial carrier; phosphate carrier), member 23	-0.717945	2.14911e-07	2.63427e-06	-0.263571	0.0567993	0.160806
ENSMUSG00000046447.4	MGI:1913509	Camk2n1	calcium/calmodulin-dependent protein kinase II inhibitor 1	-1.66315	1.2323e-07	1.63236e-06	-0.557561	0.0761706	0.197676
ENSMUSG00000046449.16	MGI:2148050	Nexmif	neurite extension and migration factor	-0.875403	8.24687e-05	0.000451716	-0.63832	0.00405492	0.0226707
ENSMUSG00000046480.7	MGI:2687406	Scn4b	sodium channel, type IV, beta	-3.63876	1.81125e-11	8.36103e-10	-1.28259	0.0162774	0.0651232
ENSMUSG00000046523.6	MGI:1914766	Kctd4	potassium channel tetramerisation domain containing 4	-2.17666	6.62455e-09	1.30492e-07	-1.07202	0.00424606	0.0235532
ENSMUSG00000046550.9	MGI:3605548	Spin2c	spindlin family, member 2C	-1.05874	7.4141e-05	0.000411778	-0.746978	0.00437356	0.0240735
ENSMUSG00000046607.7	MGI:1201608	Hrk	harakiri, BCL2 interacting protein (contains only BH3 domain)	-2.04891	1.49148e-07	1.91822e-06	-1.22878	0.00159605	0.0110039
ENSMUSG00000046637.4	MGI:2445205	Ttc34	tetratricopeptide repeat domain 34	-1.19856	2.0376e-06	1.82287e-05	-0.486407	0.047784	0.141473
ENSMUSG00000046717.6	MGI:1354380	Igbp1b	immunoglobulin (CD79A) binding protein 1b	-4.14276	0.000245468	0.00116772	-1.66702	0.0114821	0.0500213
ENSMUSG00000046785.9	MGI:1925031	Epm2aip1	EPM2A (laforin) interacting protein 1	-0.595318	4.33316e-07	4.76213e-06	-0.32732	0.0053884	0.0282166
ENSMUSG00000046807.11	MGI:2143657	Lrrc75b	leucine rich repeat containing 75B	-0.643474	0.000152645	0.000770387	-0.110377	0.511849	0.696911
ENSMUSG00000046834.8	MGI:96698	Krt1	keratin 1	-0.965914	0.00202524	0.00731262	-0.241183	0.398275	0.600836
ENSMUSG00000046999.3	MGI:1915975	1110032F04Rik	RIKEN cDNA 1110032F04 gene	-1.83085	2.03633e-10	6.46253e-09	-0.704607	0.0119908	0.051742
ENSMUSG00000047013.16	MGI:1261912	Fbxo41	F-box protein 41	-0.869659	0.00140264	0.00529976	-0.085921	0.752196	0.863862
ENSMUSG00000047193.17	MGI:107736	Dync2h1	dynein cytoplasmic 2 heavy chain 1	-0.611161	9.78935e-05	0.000523448	-0.305287	0.0511152	0.148718
ENSMUSG00000047342.18	MGI:2384758	Zfp286	zinc finger protein 286	-0.691304	0.000178458	0.000885026	-0.245417	0.180992	0.360379
ENSMUSG00000047344.10	MGI:2443335	Lancl3	LanC lantibiotic synthetase component C-like 3 (bacterial)	-1.13261	0.000238783	0.00113868	-0.680554	0.0220127	0.0813039
ENSMUSG00000047419.6	MGI:1923719	Cmya5	cardiomyopathy associated 5	-1.05221	2.64888e-07	3.14153e-06	0.0160233	0.936226	0.969358
ENSMUSG00000047502.15	MGI:2685873	Mroh7	maestro heat-like repeat family member 7	-1.30233	6.13392e-07	6.44414e-06	-0.463697	0.069178	0.18516
ENSMUSG00000047591.6	MGI:2673307	Mafa	v-maf musculoaponeurotic fibrosarcoma oncogene family, protein A (avian)	-2.54626	0.000843367	0.00341482	-0.114316	0.878718	0.938442
ENSMUSG00000047604.4	MGI:2673967	Frat2	frequently rearranged in advanced T cell lymphomas 2	-1.04843	0.000234159	0.00111994	-0.461694	0.0986069	0.237019
ENSMUSG00000047642.16	MGI:2442001	D930020B18Rik	RIKEN cDNA D930020B18 gene	-4.63892	5.13965e-05	0.000299149	-0.258032	0.664245	0.808305
ENSMUSG00000047658.7	MGI:3617843	Gal3st3	galactose-3-O-sulfotransferase 3	-0.825339	1.14061e-05	8.0276e-05	-0.503087	0.00735653	0.0355852
ENSMUSG00000047747.11	MGI:2443860	Rnf150	ring finger protein 150	-0.778568	5.40892e-06	4.24135e-05	-0.2948	0.08446	0.212685
ENSMUSG00000047749.3	MGI:2443387	Zc3hav1l	zinc finger CCCH-type, antiviral 1-like	-0.659508	0.00206897	0.00745286	-0.152071	0.473188	0.665837
ENSMUSG00000047786.13	MGI:1913893	Lix1	limb and CNS expressed 1	-0.672615	5.23278e-07	5.60918e-06	-0.105845	0.429355	0.629091
ENSMUSG00000047935.18	MGI:3645522	Sox1ot	Sox1 overlapping transcript	-2.51203	1.51426e-11	7.17116e-10	-0.685623	0.0602615	0.167466
ENSMUSG00000048004.16	MGI:2685374	Tmem196	transmembrane protein 196	-1.85778	1.34278e-10	4.59089e-09	-0.688121	0.0143015	0.0589444
ENSMUSG00000048015.5	MGI:108055	Neurod4	neurogenic differentiation 4	-2.44029	0.000903423	0.00362215	-0.558545	0.373261	0.576485
ENSMUSG00000048027.10	MGI:1916049	Rgmb	repulsive guidance molecule family member B	-0.600773	2.41381e-05	0.000155222	-0.412134	0.00365863	0.0208429
ENSMUSG00000048138.11	MGI:1330307	Dmrt2	doublesex and mab-3 related transcription factor 2	-3.90128	0.000346462	0.0015807	-0.764328	0.132438	0.290904
ENSMUSG00000048142.10	MGI:2447776	Nat8l	N-acetyltransferase 8-like	-0.889221	6.8606e-08	9.88013e-07	-0.29986	0.068694	0.184398
ENSMUSG00000048216.14	MGI:1927851	Gpr85	G protein-coupled receptor 85	-0.691229	0.000150119	0.000759597	-0.24156	0.1841	0.364457
ENSMUSG00000048218.7	MGI:2145995	Amigo2	adhesion molecule with Ig like domain 2	-1.75782	0.000221504	0.0010678	-0.896103	0.0588274	0.164896
ENSMUSG00000048249.15	MGI:1924378	Crebrf	CREB3 regulatory factor	-0.724255	4.07024e-10	1.18478e-08	-0.17892	0.120429	0.272056
ENSMUSG00000048281.10	MGI:2447771	Dleu7	deleted in lymphocytic leukemia, 7	-1.41169	2.17294e-05	0.000141683	-0.766006	0.011746	0.0509263
ENSMUSG00000048304.9	MGI:2679447	Slitrk3	SLIT and NTRK-like family, member 3	-0.778387	0.000699238	0.00290546	-0.450762	0.0494845	0.145397
ENSMUSG00000048385.10	MGI:2176606	Scrt1	scratch family zinc finger 1	-1.19816	3.42363e-09	7.41516e-08	-0.0352496	0.861329	0.928616
ENSMUSG00000048388.4	MGI:2444579	Fam171b	family with sequence similarity 171, member B	-0.749058	1.45327e-06	1.36235e-05	-0.340209	0.0285907	0.0982348
ENSMUSG00000048485.13	MGI:2387181	Zbtb8b	zinc finger and BTB domain containing 8b	-0.931347	0.000630427	0.00266025	-0.590651	0.0207894	0.0780839
ENSMUSG00000048540.9	MGI:97324	Nhlh2	nescient helix loop helix 2	-0.85305	0.000159394	0.0008015	-0.0490437	0.82012	0.905548
ENSMUSG00000048582.8	MGI:95714	Gja3	gap junction protein, alpha 3	-2.72727	1.2349e-05	8.60291e-05	-0.0629962	0.901968	0.951214
ENSMUSG00000048602.10	MGI:3045293	Morc2b	microrchidia 2B	-0.998319	0.00120754	0.00466742	0.155058	0.605052	0.766332
ENSMUSG00000048644.9	MGI:88566	Ctxn1	cortexin 1	-0.822564	0.000500485	0.0021835	-0.193588	0.412556	0.614341
ENSMUSG00000048794.15	MGI:2141635	Cfap100	cilia and flagella associated protein 100	-2.01599	5.20693e-06	4.10388e-05	-0.544693	0.208066	0.395173
ENSMUSG00000048834.17	MGI:2384826	Vstm2a	V-set and transmembrane domain containing 2A	-1.24443	2.65295e-05	0.000168077	-0.55708	0.0597891	0.166659
ENSMUSG00000048878.7	MGI:2385923	Hexim1	hexamethylene bis-acetamide inducible 1	-0.618627	6.85951e-10	1.85858e-08	-0.189424	0.0572747	0.161746
ENSMUSG00000048899.9	MGI:3040686	Rimkla	ribosomal modification protein rimK-like family member A	-0.794241	1.53331e-07	1.96465e-06	-0.412448	0.00498884	0.0266112
ENSMUSG00000048978.15	MGI:894662	Nrsn1	neurensin 1	-1.67021	1.21818e-11	6.00763e-10	-0.612655	0.0127644	0.0541694
ENSMUSG00000048988.9	MGI:2442479	Elfn1	leucine rich repeat and fibronectin type III, extracellular 1	-1.13191	8.53453e-05	0.000465242	-0.308978	0.27794	0.478684
ENSMUSG00000049001.6	MGI:1915419	Ndnf	neuron-derived neurotrophic factor	-0.786553	2.3781e-05	0.000153375	-0.157995	0.392773	0.595301
ENSMUSG00000049107.14	MGI:97380	Ntf3	neurotrophin 3	-1.60291	0.000202046	0.000985949	-1.2518	0.00371016	0.0210965
ENSMUSG00000049115.16	MGI:87964	Agtr1a	angiotensin II receptor, type 1a	-3.14465	2.45757e-05	0.000157526	-1.3702	0.00951772	0.0433845
ENSMUSG00000049184.7	MGI:1922279	Purg	purine-rich element binding protein G	-0.736425	2.52407e-09	5.73405e-08	-0.292048	0.0164445	0.0655982
ENSMUSG00000049281.17	MGI:1918882	Scn3b	sodium channel, voltage-gated, type III, beta	-2.23008	3.96547e-09	8.37697e-08	-1.11784	0.00316118	0.0186773
ENSMUSG00000049336.17	MGI:1345184	Tenm2	teneurin transmembrane protein 2	-1.38777	6.36824e-06	4.86798e-05	-0.625336	0.0415492	0.12849
ENSMUSG00000049436.6	MGI:98912	Upk1b	uroplakin 1B	-1.67226	4.03066e-05	0.000241628	-1.07501	0.00440192	0.0242055
ENSMUSG00000049511.6	MGI:96274	Htr1b	5-hydroxytryptamine (serotonin) receptor 1B	-3.00764	9.91799e-06	7.1453e-05	-1.5192	0.022593	0.0827732
ENSMUSG00000049577.16	MGI:1095400	Zfpm1	zinc finger protein, multitype 1	-0.982756	8.38551e-05	0.000458303	0.0314705	0.899263	0.950503
ENSMUSG00000049583.16	MGI:1351342	Grm5	glutamate receptor, metabotropic 5	-0.872437	6.1516e-05	0.000350682	-0.274022	0.207903	0.394927
ENSMUSG00000049612.11	MGI:106586	Omg	oligodendrocyte myelin glycoprotein	-0.801813	8.37377e-08	1.17627e-06	-0.114293	0.443877	0.641686
ENSMUSG00000049872.9	MGI:2143897	Calhm5	calcium homeostasis modulator family member 5	-1.00898	0.000306293	0.00141987	-0.595273	0.0295149	0.10042
ENSMUSG00000049929.8	MGI:1925384	Lpar4	lysophosphatidic acid receptor 4	-1.09948	8.20732e-09	1.56935e-07	-0.466877	0.0156823	0.0633534
ENSMUSG00000049946.8	MGI:2447770	BC030500	cDNA sequence BC030500	-2.92085	7.0386e-05	0.000394574	-0.83933	0.244804	0.440995
ENSMUSG00000050074.13	MGI:1925959	Spink8	serine peptidase inhibitor, Kazal type 8	-3.05631	1.24795e-05	8.67769e-05	-1.16922	0.0916988	0.225458
ENSMUSG00000050103.19	MGI:2442495	Agmo	alkylglycerol monooxygenase	-0.703583	7.4006e-07	7.60872e-06	-0.225247	0.114115	0.262305
ENSMUSG00000050132.14	MGI:2136419	Sarm1	sterile alpha and HEAT/Armadillo motif containing 1	-0.689897	3.77917e-08	5.90455e-07	-0.250747	0.0434715	0.132764
ENSMUSG00000050164.12	MGI:2180756	Mchr1	melanin-concentrating hormone receptor 1	-1.38875	5.00933e-06	3.96524e-05	-0.420412	0.160433	0.332497
ENSMUSG00000050222.12	MGI:2446510	Il17d	interleukin 17D	-0.82562	2.41764e-05	0.000155432	-0.356309	0.0607329	0.168484
ENSMUSG00000050248.12	MGI:1915775	Evc2	EvC ciliary complex subunit 2	-1.66018	3.23065e-11	1.35243e-09	-0.430958	0.0813601	0.207004
ENSMUSG00000050357.10	MGI:2685431	Carmil2	capping protein regulator and myosin 1 linker 2	-0.92811	2.30475e-06	2.03007e-05	-0.143488	0.46275	0.657466
ENSMUSG00000050379.16	MGI:1888939	Septin6	septin 6	-1.71222	2.90707e-16	6.81298e-14	-0.492871	0.0176694	0.0692506
ENSMUSG00000050424.10	MGI:2180566	Pnma5	paraneoplastic antigen family 5	-1.02641	7.29906e-05	0.000407037	-0.680966	0.00732324	0.0354598
ENSMUSG00000050473.6	MGI:1923407	Slc35d3	solute carrier family 35, member D3	-2.37083	0.0004485	0.00198225	-0.397838	0.478796	0.670711
ENSMUSG00000050538.9	MGI:1915377	B230217C12Rik	RIKEN cDNA B230217C12 gene	-0.689089	0.000412109	0.0018419	-0.315581	0.104891	0.247425
ENSMUSG00000050545.11	MGI:2442121	Fam228b	family with sequence similarity 228, member B	-0.730964	0.000112329	0.000588812	-0.242698	0.189295	0.370793
ENSMUSG00000050623.6	MGI:1914327	Catsperz	cation channel sperm associated auxiliary subunit zeta	-3.23551	2.55032e-09	5.78888e-08	-0.641514	0.175007	0.352639
ENSMUSG00000050640.17	MGI:3041258	Tmem150c	transmembrane protein 150C	-1.19763	9.95845e-06	7.16883e-05	-0.387614	0.151999	0.320825
ENSMUSG00000050663.9	MGI:2384311	Trhde	TRH-degrading enzyme	-2.52724	9.98789e-09	1.86559e-07	-0.439881	0.316693	0.520234
ENSMUSG00000050783.6	MGI:99842	Htr1f	5-hydroxytryptamine (serotonin) receptor 1F	-2.95189	5.27507e-07	5.64789e-06	-0.638133	0.183168	0.363088
ENSMUSG00000050947.10	MGI:2653612	Amigo1	adhesion molecule with Ig like domain 1	-0.629161	8.33459e-06	6.15498e-05	-0.425792	0.00254835	0.0158882
ENSMUSG00000050965.15	MGI:97595	Prkca	protein kinase C, alpha	-1.28147	6.07966e-13	4.84606e-11	-0.522685	0.0032934	0.0192316
ENSMUSG00000051177.17	MGI:97613	Plcb1	phospholipase C, beta 1	-1.03247	3.38681e-07	3.86139e-06	-0.622849	0.00207929	0.0134958
ENSMUSG00000051262.10	MGI:2136449	Nat8f3	N-acetyltransferase 8 (GCN5-related) family member 3	-1.02782	4.07471e-05	0.000243789	-0.26984	0.276075	0.476393
ENSMUSG00000051323.17	MGI:2685563	Pcdh19	protocadherin 19	-1.86758	2.20437e-07	2.68759e-06	-0.998219	0.00552883	0.0287952
ENSMUSG00000051401.8	MGI:1914659	Kctd16	potassium channel tetramerisation domain containing 16	-0.925876	0.00236332	0.00837238	-0.411204	0.176013	0.353954
ENSMUSG00000051747.16	MGI:98864	Ttn	titin	-3.48792	6.76055e-12	3.7175e-10	0.375967	0.443805	0.641621
ENSMUSG00000051777.7	MGI:3644166	Iqcj	IQ motif containing J	-4.54704	3.18986e-08	5.11197e-07	-0.641032	0.128904	0.285383
ENSMUSG00000051853.11	MGI:99432	Arf3	ADP-ribosylation factor 3	-0.850335	2.26131e-08	3.78772e-07	-0.457373	0.0026339	0.0162864
ENSMUSG00000051951.6	MGI:3528744	Xkr4	X-linked Kx blood group related 4	-1.45842	2.77414e-07	3.26607e-06	-0.669445	0.0178315	0.0697542
ENSMUSG00000052026.9	MGI:2147363	Slc6a7	solute carrier family 6 (neurotransmitter transporter, L-proline), member 7	-2.02249	7.87958e-06	5.86955e-05	-0.35265	0.433504	0.632433
ENSMUSG00000052087.15	MGI:1859709	Rgs14	regulator of G-protein signaling 14	-1.53118	0.0008178	0.00332504	-0.320024	0.483936	0.675079
ENSMUSG00000052291.9	MGI:3026931	5330438D12Rik	RIKEN cDNA 5330438D12 gene	-0.630633	0.00234086	0.00830677	-0.33819	0.0928295	0.227193
ENSMUSG00000052302.7	MGI:1921944	Tbc1d30	TBC1 domain family, member 30	-1.29372	1.67596e-06	1.53747e-05	-0.297204	0.269627	0.468918
ENSMUSG00000052364.5	MGI:2147918	B630019K06Rik	RIKEN cDNA B630019K06 gene	-0.587558	0.000838337	0.00339696	-0.536353	0.00207861	0.013495
ENSMUSG00000052403.12	MGI:3701343	Fcnaos	ficolin A, opposite strand	-1.42267	0.00143374	0.00540387	0.127626	0.753077	0.864476
ENSMUSG00000052479.6	MGI:2443215	A330008L17Rik	RIKEN cDNA A330008L17 gene	-1.53221	7.44712e-07	7.63936e-06	-0.697015	0.0224388	0.0824806
ENSMUSG00000052539.16	MGI:1923484	Magi3	membrane associated guanylate kinase, WW and PDZ domain containing 3	-0.758528	5.40975e-07	5.7808e-06	-0.263243	0.0806746	0.205782
ENSMUSG00000052544.10	MGI:1341828	St6galnac3	ST6 (alpha-N-acetyl-neuraminyl-2,3-beta-galactosyl-1,3)-N-acetylgalactosaminide alpha-2,6-sialyltransferase 3	-0.637141	0.000419802	0.00187262	-0.0637418	0.721966	0.845422
ENSMUSG00000052551.17	MGI:2151118	Adarb2	adenosine deaminase, RNA-specific, B2	-1.48542	0.00123851	0.00477195	-0.371329	0.418811	0.620066
ENSMUSG00000052727.7	MGI:1306778	Map1b	microtubule-associated protein 1B	-0.91893	4.25107e-07	4.69072e-06	-0.453495	0.0125509	0.0535182
ENSMUSG00000052928.10	MGI:2685518	Ctif	CBP80/20-dependent translation initiation factor	-0.668598	1.80809e-05	0.000120569	-0.184618	0.235788	0.430093
ENSMUSG00000052934.15	MGI:1354708	Fbxo31	F-box protein 31	-0.64122	8.2364e-05	0.000451323	-0.114943	0.479814	0.671511
ENSMUSG00000052949.15	MGI:2442484	Rnf157	ring finger protein 157	-0.747816	7.85345e-06	5.85326e-05	-0.298392	0.0743662	0.194653
ENSMUSG00000053025.14	MGI:1927338	Sv2b	synaptic vesicle glycoprotein 2 b	-3.18854	6.20884e-17	1.70246e-14	-0.797213	0.0362117	0.116723
ENSMUSG00000053040.14	MGI:1915568	Aph1c	aph1 homolog C, gamma secretase subunit	-0.66875	7.68678e-06	5.74309e-05	-0.454165	0.00194111	0.0128098
ENSMUSG00000053216.16	MGI:3606486	Btn2a2	butyrophilin, subfamily 2, member A2	-3.20069	3.03783e-06	2.56852e-05	-1.00905	0.0363543	0.117048
ENSMUSG00000053297.15	MGI:2141510	AI854703	expressed sequence AI854703	-1.19096	6.60073e-11	2.51142e-09	-0.37209	0.0375286	0.119595
ENSMUSG00000053310.12	MGI:1927184	Nrgn	neurogranin	-0.847616	0.000645036	0.00271105	-0.325181	0.19053	0.372341
ENSMUSG00000053395.16	MGI:1932376	Cacng8	calcium channel, voltage-dependent, gamma subunit 8	-0.787234	0.000199667	0.000976242	-0.297031	0.160039	0.33211
ENSMUSG00000053411.17	MGI:1196439	Cbx7	chromobox 7	-0.957347	2.13254e-06	1.89913e-05	-0.137006	0.496242	0.684888
ENSMUSG00000053465.7	MGI:1354960	Hs6st3	heparan sulfate 6-O-sulfotransferase 3	-2.10255	2.74588e-13	2.47671e-11	-0.720237	0.00938827	0.0429339
ENSMUSG00000053519.18	MGI:1917607	Kcnip1	Kv channel-interacting protein 1	-1.47322	2.0141e-08	3.43663e-07	-0.507229	0.047727	0.141376
ENSMUSG00000053550.14	MGI:3605641	Shisa7	shisa family member 7	-1.73498	4.14683e-09	8.69977e-08	-0.711645	0.0158195	0.0637689
ENSMUSG00000053552.15	MGI:2385972	Ebf4	early B cell factor 4	-0.773145	3.71703e-06	3.05244e-05	-0.377813	0.0206727	0.0777652
ENSMUSG00000053783.6	MGI:1921480	1700016K19Rik	RIKEN cDNA 1700016K19 gene	-1.60167	0.00229785	0.00817002	0.318437	0.519426	0.70285
ENSMUSG00000053916.5	MGI:1914561	Nanp	N-acetylneuraminic acid phosphatase	-0.821904	5.26401e-08	7.8662e-07	-0.377904	0.0102246	0.0457663
ENSMUSG00000053930.14	MGI:2685725	Shisa6	shisa family member 6	-1.32817	7.94311e-06	5.90564e-05	-0.405062	0.172788	0.349833
ENSMUSG00000053963.8	MGI:2138735	Stum	mechanosensory transduction mediator	-2.14279	5.76375e-08	8.47411e-07	-1.03078	0.00902848	0.041685
ENSMUSG00000054013.7	MGI:2144891	Tmem179	transmembrane protein 179	-0.69676	1.69245e-05	0.000113854	-0.38755	0.0164182	0.065534
ENSMUSG00000054074.10	MGI:1919918	Skida1	SKI/DACH domain containing 1	-0.681122	3.21851e-05	0.000198675	-0.173337	0.287142	0.489244
ENSMUSG00000054280.15	MGI:2443658	Prr14l	proline rich 14-like	-0.648809	6.80317e-07	7.07675e-06	-0.32536	0.0125628	0.0535441
ENSMUSG00000054418.7	MGI:1925653	2900041M22Rik	RIKEN cDNA 2900041M22 gene	-2.41302	1.00826e-05	7.23163e-05	-0.511153	0.248403	0.445365
ENSMUSG00000054423.15	MGI:1350922	Cadps	Ca2+-dependent secretion activator	-0.993548	2.22491e-09	5.14392e-08	-0.413575	0.0126843	0.053926
ENSMUSG00000054453.12	MGI:2668451	Sytl5	synaptotagmin-like 5	-1.58709	1.01091e-05	7.24871e-05	-0.220697	0.514117	0.698614
ENSMUSG00000054477.17	MGI:2153182	Kcnn2	potassium intermediate/small conductance calcium-activated channel, subfamily N, member 2	-1.23244	6.53255e-13	5.10955e-11	-0.415674	0.0144046	0.0592658
ENSMUSG00000054640.16	MGI:107956	Slc8a1	solute carrier family 8 (sodium/calcium exchanger), member 1	-1.78288	9.2739e-08	1.28235e-06	-0.840955	0.0116931	0.0507607
ENSMUSG00000054659.14	MGI:2685270	Pm20d2	peptidase M20 domain containing 2	-0.815774	0.00102249	0.00403407	-0.651298	0.00914543	0.0420875
ENSMUSG00000054728.18	MGI:2659021	Phactr1	phosphatase and actin regulator 1	-0.934789	3.11595e-05	0.000193084	-0.493703	0.0277692	0.0961274
ENSMUSG00000054733.10	MGI:106916	Msra	methionine sulfoxide reductase A	-0.724143	1.50055e-09	3.63152e-08	-0.334283	0.00493928	0.0263761
ENSMUSG00000054934.11	MGI:1913272	Kcnmb4	potassium large conductance calcium-activated channel, subfamily M, beta member 4	-0.875857	4.43877e-05	0.000263045	-0.286765	0.179432	0.358604
ENSMUSG00000054976.15	MGI:2443135	Nyap2	neuronal tyrosine-phophorylated phosphoinositide 3-kinase adaptor 2	-1.89814	2.59326e-07	3.08624e-06	-1.00216	0.00605994	0.0308855
ENSMUSG00000055216.4	MGI:3045277	9430025C20Rik	RIKEN cDNA 9430025C20 gene	-1.28962	0.000910556	0.00364656	-0.48154	0.15215	0.320975
ENSMUSG00000055415.9	MGI:2442688	Atp10b	ATPase, class V, type 10B	-1.71283	7.06945e-07	7.30661e-06	-0.483891	0.0895762	0.221827
ENSMUSG00000055471.8	MGI:103305	Alk	anaplastic lymphoma kinase	-1.43316	3.61113e-05	0.000219501	-0.758293	0.0210757	0.0788118
ENSMUSG00000055489.9	MGI:3576659	Ano5	anoctamin 5	-1.76075	3.84561e-05	0.000231853	-1.07173	0.00395839	0.0222034
ENSMUSG00000055493.5	MGI:1341085	Epm2a	epilepsy, progressive myoclonic epilepsy, type 2 gene alpha	-0.68423	6.84191e-10	1.85564e-08	-0.246801	0.0247389	0.0884355
ENSMUSG00000055540.16	MGI:108034	Epha6	Eph receptor A6	-1.86448	1.99568e-09	4.67306e-08	-0.385159	0.213979	0.402524
ENSMUSG00000055567.19	MGI:2652882	Unc80	unc-80, NALCN activator	-0.837404	0.00147913	0.00555205	-0.371184	0.158746	0.33034
ENSMUSG00000055692.22	MGI:107238	Tmem191c	transmembrane protein 191C	-1.01691	0.000381173	0.00171847	0.0190875	0.946716	0.975191
ENSMUSG00000055707.14	MGI:2443079	Klhl26	kelch-like 26	-0.594648	6.47667e-05	0.000366771	-0.264978	0.0743685	0.194653
ENSMUSG00000055733.7	MGI:1859565	Nap1l3	nucleosome assembly protein 1-like 3	-0.703845	0.000225027	0.0010825	-0.501815	0.00822392	0.0387593
ENSMUSG00000055761.15	MGI:2444830	Nkain3	Na+/K+ transporting ATPase interacting 3	-1.20396	0.00270928	0.00939884	-0.362477	0.363474	0.566537
ENSMUSG00000055775.17	MGI:1339712	Myh8	myosin, heavy polypeptide 8, skeletal muscle, perinatal	-3.40919	1.61582e-05	0.000109101	-1.34277	0.0105349	0.0468673
ENSMUSG00000055862.8	MGI:1918814	Izumo4	IZUMO family member 4	-0.74674	5.02497e-06	3.97188e-05	-0.164178	0.312054	0.515784
ENSMUSG00000056023.4	MGI:3642361	Gm9989	predicted gene 9989	-3.16249	0.00277039	0.00958211	-0.628793	0.389208	0.591763
ENSMUSG00000056222.16	MGI:105371	Spock1	sparc/osteonectin, cwcv and kazal-like domains proteoglycan 1	-1.57564	8.32656e-07	8.40626e-06	-0.650367	0.0416885	0.128838
ENSMUSG00000056296.18	MGI:1919253	Synpr	synaptoporin	-1.05311	0.00067778	0.00282915	-0.158503	0.608859	0.768811
ENSMUSG00000056306.7	MGI:3607715	Sertm1	serine rich and transmembrane domain containing 1	-1.0906	0.00247722	0.00871844	-0.341164	0.343481	0.547343
ENSMUSG00000056367.15	MGI:2661120	Actr3b	ARP3 actin-related protein 3B	-1.35004	4.53164e-10	1.29841e-08	-0.533205	0.0136325	0.0570181
ENSMUSG00000056476.14	MGI:2139916	Med12l	mediator complex subunit 12-like	-0.687124	7.11527e-06	5.36876e-05	-0.376335	0.0137417	0.0572654
ENSMUSG00000056486.19	MGI:1915674	Chn1	chimerin 1	-1.19627	6.6926e-06	5.07778e-05	-0.460855	0.0827458	0.20962
ENSMUSG00000056487.9	MGI:3026615	Mettl7a2	methyltransferase like 7A2	-0.624422	0.000206346	0.0010048	-0.227498	0.161709	0.334192
ENSMUSG00000056493.10	MGI:1347488	Foxk1	forkhead box K1	-0.935381	2.02582e-06	1.81529e-05	-0.50605	0.0101047	0.0453646
ENSMUSG00000056602.14	MGI:2443895	Fry	FRY microtubule binding protein	-0.671326	1.26513e-05	8.77339e-05	-0.314564	0.0406669	0.126632
ENSMUSG00000056656.7	MGI:2444921	Apol8	apolipoprotein L 8	-2.58512	6.06916e-10	1.66583e-08	-0.777961	0.0365998	0.117478
ENSMUSG00000056752.17	MGI:1289279	Dnah9	dynein, axonemal, heavy chain 9	-0.953617	0.00224881	0.00802479	-0.17375	0.57665	0.747395
ENSMUSG00000056812.15	MGI:106019	St8sia3	ST8 alpha-N-acetyl-neuraminide alpha-2,8-sialyltransferase 3	-0.786847	3.48952e-06	2.88984e-05	-0.436436	0.00997531	0.044931
ENSMUSG00000057230.15	MGI:1098687	Aak1	AP2 associated kinase 1	-0.792172	4.10454e-05	0.000245228	-0.23897	0.215872	0.404787
ENSMUSG00000057378.16	MGI:99684	Ryr3	ryanodine receptor 3	-1.96099	6.42895e-14	7.1295e-12	-0.675503	0.00954739	0.0434549
ENSMUSG00000057615.6	MGI:2685212	Ldoc1	regulator of NFKB signaling	-2.15168	6.78474e-05	0.000382104	-1.02216	0.0272811	0.094792
ENSMUSG00000057649.7	MGI:2145317	Brd9	bromodomain containing 9	-0.982566	1.27571e-08	2.31349e-07	-0.396535	0.0213547	0.079656
ENSMUSG00000057715.14	MGI:2444149	A830018L16Rik	RIKEN cDNA A830018L16 gene	-1.4811	8.55467e-06	6.29885e-05	-0.926495	0.00531594	0.0279162
ENSMUSG00000057716.8	MGI:3647581	Tmem178b	transmembrane protein 178B	-1.1518	1.05897e-08	1.96462e-07	-0.612711	0.00228174	0.014535
ENSMUSG00000057897.15	MGI:88257	Camk2b	calcium/calmodulin-dependent protein kinase II, beta	-1.06904	0.000149662	0.000757564	-0.382875	0.174455	0.352138
ENSMUSG00000057914.16	MGI:894644	Cacnb2	calcium channel, voltage-dependent, beta 2 subunit	-0.885547	4.54289e-06	3.64069e-05	-0.254402	0.186311	0.366991
ENSMUSG00000058145.17	MGI:3588195	Adamts17	a disintegrin-like and metallopeptidase (reprolysin type) with thrombospondin type 1 motif, 17	-1.74321	7.20662e-07	7.43309e-06	-0.951845	0.0064569	0.032441
ENSMUSG00000058192.17	MGI:1924012	Zfp846	zinc finger protein 846	-0.631067	0.000111821	0.000586595	-0.150363	0.354329	0.557714
ENSMUSG00000058317.13	MGI:2384997	Ube2e2	ubiquitin-conjugating enzyme E2E 2	-1.09987	1.72799e-08	3.016e-07	-0.414372	0.0332509	0.109365
ENSMUSG00000058441.8	MGI:1890615	Panx2	pannexin 2	-1.70108	8.40252e-07	8.47048e-06	-0.382207	0.267593	0.466953
ENSMUSG00000058488.8	MGI:1101771	Kl	klotho	-1.53063	8.00435e-05	0.000439486	-0.854876	0.0267174	0.093368
ENSMUSG00000058589.15	MGI:1924781	Anks1b	ankyrin repeat and sterile alpha motif domain containing 1B	-0.999786	3.5237e-08	5.56827e-07	-0.474443	0.00883871	0.0409985
ENSMUSG00000058740.15	MGI:1924627	Kcnt1	potassium channel, subfamily T, member 1	-1.51456	3.30703e-06	2.76568e-05	-0.467731	0.147315	0.31372
ENSMUSG00000058756.14	MGI:98742	Thra	thyroid hormone receptor alpha	-1.43472	4.22903e-11	1.71538e-09	-0.533232	0.0141918	0.0586366
ENSMUSG00000058761.6	MGI:1920257	Rnf169	ring finger protein 169	-0.616672	3.95239e-07	4.40011e-06	-0.346112	0.00432386	0.0238709
ENSMUSG00000058897.19	MGI:1924268	Col25a1	collagen, type XXV, alpha 1	-2.03463	0.000381012	0.00171803	-0.857078	0.133935	0.293121
ENSMUSG00000059003.13	MGI:95820	Grin2a	glutamate receptor, ionotropic, NMDA2A (epsilon 1)	-1.0797	0.00017635	0.00087584	-0.435328	0.130402	0.287694
ENSMUSG00000059173.20	MGI:1201792	Pde1a	phosphodiesterase 1A, calmodulin-dependent	-2.40075	2.21288e-07	2.69437e-06	-1.19924	0.00950391	0.0433391
ENSMUSG00000059187.13	MGI:2443695	Tafa1	TAFA chemokine like family member 1	-1.58181	1.05523e-05	7.51598e-05	-0.955281	0.00769315	0.0368333
ENSMUSG00000059203.11	MGI:1913106	Il1rapl2	interleukin 1 receptor accessory protein-like 2	-2.72803	6.34623e-09	1.25642e-07	-0.890005	0.00599957	0.0306298
ENSMUSG00000059213.8	MGI:108101	Ddn	dendrin	-2.04976	2.48254e-09	5.65845e-08	-1.04349	0.00240011	0.0151566
ENSMUSG00000059361.7	MGI:2684969	Nrsn2	neurensin 2	-2.40547	4.29178e-06	3.45916e-05	-1.10685	0.0330721	0.108946
ENSMUSG00000059412.8	MGI:1195260	Fxyd2	FXYD domain-containing ion transport regulator 2	-0.903269	3.39919e-05	0.000208607	-0.245337	0.237277	0.431726
ENSMUSG00000059456.14	MGI:104908	Ptk2b	PTK2 protein tyrosine kinase 2 beta	-1.39455	3.46164e-06	2.87283e-05	-0.651261	0.0301799	0.102061
ENSMUSG00000059674.8	MGI:1928330	Cdh24	cadherin-like 24	-1.84389	1.69847e-08	2.97206e-07	-0.248412	0.441353	0.639383
ENSMUSG00000059742.11	MGI:2159566	Kcnh7	potassium voltage-gated channel, subfamily H (eag-related), member 7	-2.39449	1.22448e-07	1.62513e-06	-1.15383	0.0105831	0.0470023
ENSMUSG00000059839.10	MGI:3040702	Zfp874b	zinc finger protein 874b	-0.596345	2.31321e-07	2.79913e-06	-0.193361	0.0883627	0.21966
ENSMUSG00000059974.11	MGI:2446259	Ntm	neurotrimin	-0.836139	1.24313e-07	1.64273e-06	-0.422124	0.00745278	0.0359784
ENSMUSG00000059995.13	MGI:3036270	Atxn7l3	ataxin 7-like 3	-0.643492	1.30609e-07	1.716e-06	-0.183664	0.131183	0.288807
ENSMUSG00000060152.15	MGI:2151221	Pop5	processing of precursor 5, ribonuclease P/MRP family (S. cerevisiae)	-0.625885	5.83248e-05	0.000333946	-0.457297	0.00323771	0.0190006
ENSMUSG00000060206.12	MGI:107690	Zfp462	zinc finger protein 462	-1.00264	0.000146575	0.000744273	-0.493186	0.0606028	0.16822
ENSMUSG00000060212.14	MGI:2445010	Pcnx2	pecanex homolog 2	-1.92226	1.94571e-08	3.33446e-07	-0.423702	0.21404	0.40259
ENSMUSG00000060240.13	MGI:1929898	Cend1	cell cycle exit and neuronal differentiation 1	-0.638451	1.00806e-05	7.23163e-05	-0.314298	0.0294286	0.100238
ENSMUSG00000060260.14	MGI:2142008	Pwwp2b	PWWP domain containing 2B	-0.870736	1.7069e-08	2.98299e-07	-0.216448	0.157216	0.328324
ENSMUSG00000060380.4	MGI:1924631	C030014I23Rik	RIKEN cDNA C030014I23 gene	-0.914809	0.00211833	0.00760459	-0.835271	0.00450127	0.0245552
ENSMUSG00000060424.15	MGI:1913547	Pantr1	POU domain, class 3, transcription factor 3 adjacent noncoding transcript 1	-1.51825	8.74445e-08	1.21836e-06	-0.834005	0.00318364	0.0187823
ENSMUSG00000060530.3	MGI:2685151	A930017M01Rik	RIKEN cDNA A930017M01 gene	-0.718607	0.00117526	0.0045639	-0.170626	0.437701	0.635875
ENSMUSG00000060681.16	MGI:2443511	Slc9a6	solute carrier family 9 (sodium/hydrogen exchanger), member 6	-0.856362	1.11349e-08	2.05463e-07	-0.335805	0.0247788	0.0885019
ENSMUSG00000060716.8	MGI:2144989	Plekhh1	pleckstrin homology domain containing, family H (with MyTH4 domain) member 1	-0.795772	0.00182886	0.00669526	-0.666125	0.00884713	0.0410289
ENSMUSG00000060735.5	MGI:2441827	Rxfp3	relaxin family peptide receptor 3	-2.02784	0.000170258	0.000849742	-0.452456	0.375331	0.578343
ENSMUSG00000060780.3	MGI:2389173	Lrrtm1	leucine rich repeat transmembrane neuronal 1	-0.920749	0.000622895	0.00263577	-0.566808	0.0348761	0.113366
ENSMUSG00000060882.6	MGI:102663	Kcnd2	potassium voltage-gated channel, Shal-related family, member 2	-1.05114	1.74464e-08	3.04312e-07	-0.560516	0.00263793	0.0163029
ENSMUSG00000060985.16	MGI:2684949	Tdrd5	tudor domain containing 5	-2.08393	9.67162e-13	7.12892e-11	-0.614362	0.0218262	0.0808401
ENSMUSG00000061298.15	MGI:1918244	Agbl4	ATP/GTP binding protein-like 4	-2.44817	7.02679e-11	2.643e-09	-1.09578	0.00153573	0.0106892
ENSMUSG00000061313.11	MGI:1919358	Ddhd2	DDHD domain containing 2	-0.696796	1.87943e-09	4.41215e-08	-0.234918	0.0421236	0.129578
ENSMUSG00000061517.9	MGI:2654070	Sox21	SRY (sex determining region Y)-box 21	-0.640148	0.0020875	0.00751074	-0.145263	0.478626	0.670512
ENSMUSG00000061601.16	MGI:1349390	Pclo	piccolo (presynaptic cytomatrix protein)	-1.22749	9.35272e-07	9.27828e-06	-0.32704	0.19103	0.372923
ENSMUSG00000061718.13	MGI:94860	Ppp1r1b	protein phosphatase 1, regulatory inhibitor subunit 1B	-1.71402	7.93676e-06	5.90564e-05	-0.542419	0.155676	0.326125
ENSMUSG00000061762.13	MGI:98474	Tac1	tachykinin 1	-1.81132	9.13928e-07	9.09835e-06	-0.244326	0.485249	0.676243
ENSMUSG00000061816.16	MGI:97269	Myl1	myosin, light polypeptide 1	-1.18843	0.000980835	0.00389099	-0.164561	0.666302	0.809141
ENSMUSG00000061974.3	MGI:3712484	Cldn24	claudin 24	-4.36276	5.72917e-07	6.07479e-06	-1.26316	0.0449595	0.135698
ENSMUSG00000062190.13	MGI:1919085	Lancl2	LanC (bacterial lantibiotic synthetase component C)-like 2	-0.624186	3.32792e-06	2.77746e-05	-0.377789	0.00472552	0.0255043
ENSMUSG00000062232.15	MGI:2659071	Rapgef2	Rap guanine nucleotide exchange factor (GEF) 2	-1.23598	8.95608e-09	1.69363e-07	-0.65515	0.00228312	0.01454
ENSMUSG00000062252.10	MGI:1915382	Lhfpl5	lipoma HMGIC fusion partner-like 5	-2.53948	3.84897e-09	8.156e-08	-0.605458	0.0662437	0.179323
ENSMUSG00000062257.14	MGI:97397	Opcml	opioid binding protein/cell adhesion molecule-like	-1.21159	4.08319e-10	1.18729e-08	-0.552862	0.00426986	0.023647
ENSMUSG00000062309.9	MGI:2143151	Rpp25	ribonuclease P/MRP 25 subunit	-2.49112	8.08514e-10	2.13373e-08	-0.990523	0.00852054	0.0398681
ENSMUSG00000062563.16	MGI:2177632	Cys1	cystin 1	-2.81933	1.27311e-09	3.16776e-08	-1.14217	0.0130895	0.0551883
ENSMUSG00000062961.8	MGI:2686414	Ccdc177	coiled-coil domain containing 177	-1.01307	7.90551e-06	5.88567e-05	-0.460727	0.0403389	0.125865
ENSMUSG00000063063.13	MGI:88275	Ctnna2	catenin (cadherin associated protein), alpha 2	-1.07079	7.1866e-14	7.69752e-12	-0.416092	0.00351215	0.0201633
ENSMUSG00000063077.16	MGI:108426	Kif1b	kinesin family member 1B	-0.635641	1.38745e-08	2.48815e-07	-0.337399	0.00258367	0.0160584
ENSMUSG00000063087.16	MGI:3642044	Gm10125	predicted gene 10125	-1.12528	7.14814e-07	7.37959e-06	-0.313725	0.145524	0.311009
ENSMUSG00000063142.16	MGI:99923	Kcnma1	potassium large conductance calcium-activated channel, subfamily M, alpha member 1	-0.887302	2.80005e-06	2.39854e-05	-0.342807	0.0700167	0.186811
ENSMUSG00000063297.8	MGI:1889615	Luzp2	leucine zipper protein 2	-0.753155	3.63921e-05	0.000220914	-0.141476	0.437173	0.635395
ENSMUSG00000063317.8	MGI:1923429	Usp31	ubiquitin specific peptidase 31	-0.781463	1.74592e-06	1.59153e-05	-0.459911	0.00482682	0.0259079
ENSMUSG00000063430.10	MGI:2445030	Wscd2	WSC domain containing 2	-0.794518	0.000139541	0.000712651	-0.269036	0.196315	0.379878
ENSMUSG00000063446.5	MGI:2445015	Plppr1	phospholipid phosphatase related 1	-0.744827	0.000710906	0.00294724	-0.202979	0.353244	0.556947
ENSMUSG00000063455.17	MGI:2669829	D630045J12Rik	RIKEN cDNA D630045J12 gene	-0.693426	0.000119855	0.000622548	0.0229173	0.898566	0.950281
ENSMUSG00000063623.5	MGI:2442417	C230062I16Rik	RIKEN cDNA C230062I16 gene	-1.06087	0.000145493	0.000739576	-0.014339	0.955545	0.979067
ENSMUSG00000063646.19	MGI:1923321	Jakmip1	janus kinase and microtubule interacting protein 1	-1.05988	1.90313e-05	0.000125805	-0.262297	0.288393	0.490918
ENSMUSG00000063659.12	MGI:1353609	Zbtb18	zinc finger and BTB domain containing 18	-1.03602	2.60671e-07	3.10091e-06	-0.443742	0.0273772	0.0950296
ENSMUSG00000063661.7	MGI:3607712	Krt73	keratin 73	-2.63576	1.85882e-08	3.2084e-07	-1.15026	0.00630204	0.0318427
ENSMUSG00000063698.10	MGI:2137680	Sfxn4	sideroflexin 4	-0.830751	4.35097e-08	6.67246e-07	-0.274286	0.0640307	0.174828
ENSMUSG00000063804.9	MGI:3584032	Lin28b	lin-28 homolog B (C. elegans)	-1.68994	7.2255e-05	0.00040351	-0.313193	0.42145	0.622211
ENSMUSG00000063887.14	MGI:2179435	Nlgn1	neuroligin 1	-0.664657	0.00087206	0.00351387	-0.530638	0.00775799	0.03705
ENSMUSG00000063972.14	MGI:1352459	Nr6a1	nuclear receptor subfamily 6, group A, member 1	-0.644445	0.000169555	0.00084654	-0.433804	0.0103749	0.0463441
ENSMUSG00000064036.16	MGI:2152817	Mro	maestro	-0.671619	1.24776e-07	1.64725e-06	-0.0761079	0.545665	0.722773
ENSMUSG00000064043.16	MGI:2442086	Trerf1	transcriptional regulating factor 1	-1.18285	8.59114e-05	0.000467956	-0.201815	0.501988	0.689774
ENSMUSG00000064115.14	MGI:2442722	Cadm2	cell adhesion molecule 2	-1.07807	3.02521e-06	2.56023e-05	-0.365097	0.113809	0.261802
ENSMUSG00000064181.7	MGI:105933	Rab3ip	RAB3A interacting protein	-0.804173	0.000132613	0.000680689	-0.162848	0.437715	0.635875
ENSMUSG00000064336.1	MGI:102487	mt-Tf	mitochondrially encoded tRNA phenylalanine	-0.939908	0.000226732	0.00108975	-0.377694	0.129119	0.285624
ENSMUSG00000064338.1	MGI:102472	mt-Tv	mitochondrially encoded tRNA valine	-0.95396	0.00229465	0.00816391	-0.982858	0.00169305	0.0115317
ENSMUSG00000064340.1	MGI:102482	mt-Tl1	mitochondrially encoded tRNA leucine 1	-0.843454	9.25089e-07	9.19722e-06	-0.39914	0.0198524	0.075458
[truncated: 478 more rows]

## Sheet: EZ_3<1.5FC
gene	MGI_ID	GeneSymbol	Description	EZ_3_log2FoldChange	EZ_3_pvalue	EZ_3_padj	PIZ_3_log2FoldChange	PIZ_3_pvalue	PIZ_3_padj
[truncated: 1,930 more rows]

[truncated: 12 more sheets: PIZ_3Up, PIZ_3Up_v_EZ_3Up, PIZ_3Up_v_EZ_3DN, PIZ_3Up_v_EZ_3<1.5FC, PIZ_3DN, PIZ_3DN_v_EZ_3Up, PIZ_3DN_v_EZ_3DN, PIZ_3DN_v_EZ_3<1.5FC, PIZ_3<1.5FC, PIZ_3<1.5FC_v_EZ_3Up, PIZ_3<1.5FC_v_EZ_3DN, PIZ_3<1.5FC_v_EZ_3<1.5FC]
