# Supplementary material for: Transcriptome Profiling of the Hippocampal Seizure Network Implicates a Role for Wnt Signaling during Epileptogenesis in a Mouse Model of Temporal Lobe Epilepsy
Source: Int J Mol Sci. 2022 Oct 10;23(19):12030. doi: 10.3390/ijms231912030 (PMC9569502; doi:10.3390/ijms231912030)
Supplement: Supplementary file 1 [file ijms-23-12030-s001.zip › Supplementary Table S4.xlsx]

## Sheet: EZ_7Up
gene	MGI_ID	GeneSymbol	Description	EZ_7_log2FoldChange	EZ_7_pvalue	EZ_7_padj	PIZ_7_log2FoldChange	PIZ_7_pvalue	PIZ_7_padj
ENSMUSG00000000001.5	MGI:95773	Gnai3	guanine nucleotide binding protein (G protein), alpha inhibiting 3	0.657445	2.81005e-10	4.349e-09	-0.000269131	0.997964	0.999733
ENSMUSG00000000028.16	MGI:1338073	Cdc45	cell division cycle 45	1.14041	7.47662e-06	4.00279e-05	-0.0974996	0.725847	0.914908
ENSMUSG00000000031.17	MGI:95891	H19	H19, imprinted maternally expressed transcript	6.16845	1.15652e-11	2.44484e-10	0.681469	0.514623	0.818225
ENSMUSG00000000058.7	MGI:107571	Cav2	caveolin 2	1.31887	7.75499e-11	1.36967e-09	0.156636	0.442789	0.775379
ENSMUSG00000000078.8	MGI:1346318	Klf6	Kruppel-like factor 6	1.09905	4.52008e-13	1.30438e-11	0.19826	0.196925	0.569989
ENSMUSG00000000093.7	MGI:98494	Tbx2	T-box 2	0.911005	0.000893554	0.00294619	0.237494	0.400245	0.745337
ENSMUSG00000000134.18	MGI:98511	Tfe3	transcription factor E3	0.811534	1.91287e-13	6.00822e-12	0.127725	0.25353	0.631123
ENSMUSG00000000149.11	MGI:95767	Gna12	guanine nucleotide binding protein, alpha 12	1.08006	1.16601e-10	1.97453e-09	0.355527	0.034542	0.267094
ENSMUSG00000000154.17	MGI:1336884	Slc22a18	solute carrier family 22 (organic cation transporter), member 18	1.80497	0.0010563	0.00341123	0.868446	0.200764	0.574011
ENSMUSG00000000159.17	MGI:1919308	Igsf5	immunoglobulin superfamily, member 5	1.39922	0.00146337	0.004562	-0.2955	0.541664	0.832458
ENSMUSG00000000204.17	MGI:1329010	Slfn4	schlafen 4	4.32549	9.01163e-10	1.22588e-08	1.37585	0.100503	0.428523
ENSMUSG00000000244.18	MGI:1350360	Tspan32	tetraspanin 32	3.14028	3.03716e-08	2.84632e-07	2.12896	0.00216129	0.060636
ENSMUSG00000000263.16	MGI:95747	Glra1	glycine receptor, alpha 1 subunit	4.82417	0.00202291	0.0060899	1.88862	0.228621
ENSMUSG00000000275.17	MGI:102749	Trim25	tripartite motif-containing 25	2.67886	2.14638e-19	4.57434e-17	0.906069	0.00259858	0.0672863
ENSMUSG00000000278.11	MGI:1921867	Scpep1	serine carboxypeptidase 1	2.17556	5.34989e-14	1.90447e-12	0.467345	0.109891	0.442461
ENSMUSG00000000290.14	MGI:96611	Itgb2	integrin beta 2	3.97792	3.93514e-21	1.64084e-18	1.1665	0.00614622	0.108545
ENSMUSG00000000305.13	MGI:99218	Cdh4	cadherin 4	1.6665	2.02208e-07	1.5822e-06	0.501285	0.120673	0.460527
ENSMUSG00000000326.14	MGI:88470	Comt	catechol-O-methyltransferase	0.602238	2.68873e-09	3.24622e-08	0.116886	0.251845	0.62989
ENSMUSG00000000346.10	MGI:1344344	Dazap2	DAZ associated protein 2	0.657592	1.31969e-09	1.72038e-08	-0.0387098	0.722261	0.914119
ENSMUSG00000000392.18	MGI:109608	Fap	fibroblast activation protein	1.81129	0.00196264	0.00593142	0.036953	0.951286	0.987859
ENSMUSG00000000420.16	MGI:894693	Galnt1	polypeptide N-acetylgalactosaminyltransferase 1	0.95345	3.89832e-17	3.527e-15	0.0358853	0.753778	0.922232
ENSMUSG00000000489.8	MGI:97528	Pdgfb	platelet derived growth factor, B polypeptide	1.16306	2.04981e-09	2.54563e-08	0.125448	0.521782	0.822133
ENSMUSG00000000530.17	MGI:1338946	Acvrl1	activin A receptor, type II-like 1	1.21289	5.95345e-07	4.14319e-06	0.0641799	0.79298	0.937578
ENSMUSG00000000552.11	MGI:1352495	Zfp385a	zinc finger protein 385A	0.658935	4.15446e-07	3.0161e-06	0.385255	0.003541	0.0803157
ENSMUSG00000000555.9	MGI:96604	Itga5	integrin alpha 5 (fibronectin receptor alpha)	3.98824	3.76399e-16	2.38532e-14	1.02591	0.0410447	0.287008
ENSMUSG00000000562.6	MGI:104847	Adora3	adenosine A3 receptor	2.64765	8.86334e-12	1.91017e-10	1.05074	0.0107618	0.149242
ENSMUSG00000000567.6	MGI:98371	Sox9	SRY (sex determining region Y)-box 9	1.30812	4.89947e-13	1.40122e-11	0.482099	0.00833046	0.129813
ENSMUSG00000000579.15	MGI:3807476	Dynlt1c	dynein light chain Tctex-type 1C	1.37605	5.21177e-09	5.89972e-08	0.109606	0.648611	0.885572
ENSMUSG00000000594.8	MGI:95762	Gm2a	GM2 ganglioside activator protein	1.58699	6.41429e-16	3.78235e-14	0.397216	0.04386	0.29559
ENSMUSG00000000628.11	MGI:1315197	Hk2	hexokinase 2	2.6605	9.27931e-18	1.05524e-15	0.896278	0.00426504	0.0883051
ENSMUSG00000000673.10	MGI:1349444	Haao	3-hydroxyanthranilate 3,4-dioxygenase	2.59245	1.7369e-06	1.08494e-05	2.2276	0.0010332	0.03826
ENSMUSG00000000686.12	MGI:1914727	Abhd15	abhydrolase domain containing 15	1.97436	2.15967e-08	2.09635e-07	0.245397	0.52542	0.824109
ENSMUSG00000000693.11	MGI:1337004	Loxl3	lysyl oxidase-like 3	2.53822	3.1529e-10	4.84574e-09	0.509594	0.212129	0.587405
ENSMUSG00000000708.15	MGI:1343094	Kat2b	K(lysine) acetyltransferase 2B	0.956507	5.39471e-11	9.86721e-10	0.196742	0.186678	0.55801
ENSMUSG00000000732.10	MGI:1354701	Icosl	icos ligand	1.1134	1.1602e-08	1.20072e-07	0.650434	0.00101997	0.0378377
ENSMUSG00000000751.14	MGI:1915525	Rpa1	replication protein A1	0.929704	5.18044e-08	4.63309e-07	-0.0569787	0.739515	0.918223
ENSMUSG00000000753.16	MGI:108080	Serpinf1	serine (or cysteine) peptidase inhibitor, clade F, member 1	4.07256	1.04457e-16	8.23379e-15	1.05686	0.0318844	0.258465
ENSMUSG00000000782.17	MGI:98507	Tcf7	transcription factor 7, T cell specific	1.3384	2.39213e-06	1.43443e-05	0.363593	0.21148	0.586647
ENSMUSG00000000889.9	MGI:94864	Dbh	dopamine beta hydroxylase	1.87948	0.00167314	0.00513635	-1.05266	0.0865858	0.401918
ENSMUSG00000000901.18	MGI:97008	Mmp11	matrix metallopeptidase 11	1.90345	5.84762e-07	4.0776e-06	0.216303	0.586257	0.857851
ENSMUSG00000000957.12	MGI:101900	Mmp14	matrix metallopeptidase 14 (membrane-inserted)	1.72792	2.68528e-09	3.24341e-08	-0.0332958	0.909692	0.97659
ENSMUSG00000000958.11	MGI:1337120	Slc7a7	solute carrier family 7 (cationic amino acid transporter, y+ system), member 7	3.1974	2.75723e-14	1.0363e-12	1.10261	0.0116937	0.155104
ENSMUSG00000000982.6	MGI:98260	Ccl3	chemokine (C-C motif) ligand 3	4.68956	1.59981e-14	6.36628e-13	2.34579	0.00125232	0.043416
ENSMUSG00000001020.9	MGI:1330282	S100a4	S100 calcium binding protein A4	3.76941	1.56513e-11	3.22106e-10	0.856061	0.136842	0.48751
ENSMUSG00000001021.14	MGI:1338849	S100a3	S100 calcium binding protein A3	3.10944	1.57645e-07	1.26551e-06	0.897498	0.159793	0.521037
ENSMUSG00000001025.9	MGI:1339467	S100a6	S100 calcium binding protein A6 (calcyclin)	3.52178	9.63591e-21	3.34018e-18	1.19578	0.00170664	0.0529494
ENSMUSG00000001123.16	MGI:109496	Lgals9	lectin, galactose binding, soluble 9	3.69462	7.9382e-24	1.26883e-20	1.1318	0.00223339	0.0617786
ENSMUSG00000001131.12	MGI:98752	Timp1	tissue inhibitor of metalloproteinase 1	6.60284	4.03181e-15	1.90163e-13	3.12093	0.00176833	0.0542172
ENSMUSG00000001166.18	MGI:2149633	Oas1c	2'-5' oligoadenylate synthetase 1C	2.70271	3.95826e-10	5.94069e-09	0.939556	0.0452078	0.30017
ENSMUSG00000001228.15	MGI:1338889	Uhrf1	ubiquitin-like, containing PHD and RING finger domains, 1	3.22044	1.11742e-19	2.67912e-17	1.12127	0.00273785	0.0689522
ENSMUSG00000001247.17	MGI:1927471	Lsr	lipolysis stimulated lipoprotein receptor	0.905239	0.000487096	0.0017086	0.100166	0.703376	0.906753
ENSMUSG00000001249.15	MGI:1196620	Hpn	hepsin	1.80539	1.29765e-08	1.32628e-07	0.941561	0.00391736	0.0846699
ENSMUSG00000001270.10	MGI:88407	Ckb	creatine kinase, brain	0.661138	9.72212e-08	8.17403e-07	0.205707	0.0974037	0.423239
ENSMUSG00000001280.14	MGI:98372	Sp1	trans-acting transcription factor 1	0.646354	7.87991e-07	5.34196e-06	0.0764413	0.563253	0.843953
ENSMUSG00000001281.11	MGI:96616	Itgb7	integrin beta 7	1.81891	9.26675e-05	0.000384668	0.596244	0.239013	0.616539
ENSMUSG00000001288.16	MGI:97858	Rarg	retinoic acid receptor, gamma	0.860816	2.11992e-07	1.64844e-06	0.383803	0.0234409	0.220172
ENSMUSG00000001313.13	MGI:1338755	Rnd2	Rho family GTPase 2	0.862741	6.97461e-06	3.7571e-05	0.514492	0.00755124	0.121707
ENSMUSG00000001348.16	MGI:87883	Acp5	acid phosphatase 5, tartrate resistant	4.33257	6.36931e-08	5.59375e-07	0.669979	0.433053	0.769121
ENSMUSG00000001349.6	MGI:104979	Cnn1	calponin 1	3.57605	1.31859e-05	6.68262e-05	-0.106546	0.900067	0.97362
ENSMUSG00000001403.14	MGI:1915862	Ube2c	ubiquitin-conjugating enzyme E2C	4.42904	5.12254e-16	3.12247e-14	1.78986	0.00245038	0.065332
ENSMUSG00000001418.14	MGI:1913318	Glmp	glycosylated lysosomal membrane protein	1.53782	3.4099e-14	1.25939e-12	0.179218	0.380349	0.731734
ENSMUSG00000001435.16	MGI:88451	Col18a1	collagen, type XVIII, alpha 1	3.90866	1.98714e-12	4.94139e-11	1.08157	0.0526316	0.322389
ENSMUSG00000001473.8	MGI:1915201	Tubb6	tubulin, beta 6 class V	4.59278	1.24034e-18	1.95004e-16	1.58577	0.00398343	0.0853585
ENSMUSG00000001506.11	MGI:88467	Col1a1	collagen, type I, alpha 1	3.18626	2.33938e-10	3.69381e-09	1.66812	0.000999342	0.0374762
ENSMUSG00000001508.16	MGI:894698	Sgca	sarcoglycan, alpha (dystrophin-associated glycoprotein)	1.47834	0.000787586	0.00262842	1.21934	0.0144897	0.175293
ENSMUSG00000001517.15	MGI:1347487	Foxm1	forkhead box M1	2.91617	1.03172e-16	8.15488e-15	0.597493	0.0962673	0.421484
ENSMUSG00000001542.8	MGI:2183438	Ell2	elongation factor for RNA polymerase II 2	0.659179	0.000516799	0.00180141	0.24951	0.193254	0.565978
ENSMUSG00000001555.11	MGI:104769	Fkbp10	FK506 binding protein 10	2.07766	3.63584e-15	1.74636e-13	0.499949	0.0631226	0.348123
ENSMUSG00000001558.6	MGI:2181067	Klhl10	kelch-like 10	2.18681	0.000843664	0.00279579	-0.194567	0.76118	0.925191
ENSMUSG00000001588.13	MGI:2388270	Acap1	ArfGAP with coiled-coil, ankyrin repeat and PH domains 1	3.02948	0.000263772	0.000981757	0.288575	0.738799
ENSMUSG00000001604.15	MGI:1196908	Tcea3	transcription elongation factor A (SII), 3	2.30325	0.000974577	0.00317873	0.284648	0.718651	0.913202
ENSMUSG00000001642.19	MGI:1353494	Akr1b3	aldo-keto reductase family 1, member B3 (aldose reductase)	0.912609	6.49817e-10	9.21888e-09	0.00670981	0.964197	0.990854
ENSMUSG00000001665.12	MGI:2143526	Gstt3	glutathione S-transferase, theta 3	0.8417	0.00147617	0.00459685	0.10119	0.714369	0.911283
ENSMUSG00000001750.17	MGI:1350931	Tcirg1	T cell, immune regulator 1, ATPase, H+ transporting, lysosomal V0 protein A3	2.98615	9.21067e-20	2.26496e-17	1.18268	0.000349848	0.0197511
ENSMUSG00000001751.10	MGI:1351641	Naglu	alpha-N-acetylglucosaminidase (Sanfilippo disease IIIB)	2.84484	3.51245e-19	6.81968e-17	0.551933	0.0859237	0.400817
ENSMUSG00000001761.8	MGI:108075	Smo	smoothened, frizzled class receptor	0.804691	2.95758e-07	2.22738e-06	-0.231117	0.14614	0.499879
ENSMUSG00000001768.17	MGI:1921280	Rin2	Ras and Rab interactor 2	1.32874	2.43104e-10	3.81995e-09	0.371819	0.0776924	0.383856
ENSMUSG00000001794.14	MGI:88266	Capns1	calpain, small subunit 1	1.03368	1.75428e-13	5.56475e-12	0.236022	0.0935815	0.415644
ENSMUSG00000001870.17	MGI:109151	Ltbp1	latent transforming growth factor beta binding protein 1	2.28151	1.6099e-16	1.17859e-14	0.293195	0.297333	0.670486
ENSMUSG00000001918.18	MGI:105305	Slc1a5	solute carrier family 1 (neutral amino acid transporter), member 5	3.04919	1.91925e-18	2.77481e-16	0.439931	0.222892	0.599528
ENSMUSG00000001930.18	MGI:98941	Vwf	Von Willebrand factor	2.00952	4.7412e-07	3.39157e-06	0.381444	0.340132	0.705566
ENSMUSG00000001946.15	MGI:1916774	Esam	endothelial cell-specific adhesion molecule	0.784674	3.49029e-05	0.00016044	-0.0143496	0.940152	0.985011
ENSMUSG00000002007.6	MGI:1891338	Srpk3	serine/arginine-rich protein specific kinase 3	1.59414	8.04888e-08	6.90237e-07	0.424605	0.16772	0.53267
ENSMUSG00000002014.13	MGI:1099464	Ssr4	signal sequence receptor, delta	0.966784	2.85659e-11	5.56588e-10	0.0557244	0.703724	0.906753
ENSMUSG00000002015.6	MGI:1350933	Bcap31	B cell receptor associated protein 31	0.59159	4.44578e-06	2.50459e-05	0.0392668	0.762464	0.925738
ENSMUSG00000002104.12	MGI:99422	Rapsn	receptor-associated protein of the synapse	3.36135	1.74646e-10	2.84204e-09	1.93485	0.000977714	0.03719
ENSMUSG00000002111.9	MGI:98282	Spi1	spleen focus forming virus (SFFV) proviral integration oncogene	3.33255	4.51856e-17	4.00011e-15	1.18545	0.00349102	0.0799721
ENSMUSG00000002147.19	MGI:103034	Stat6	signal transducer and activator of transcription 6	2.28551	2.79491e-13	8.44666e-12	0.51639	0.103062	0.431522
ENSMUSG00000002204.10	MGI:109365	Napsa	napsin A aspartic peptidase	3.61089	0.000192295	0.000737177	-1.08927	0.284687	0.659693
ENSMUSG00000002227.16	MGI:97054	Mov10	Mov10 RISC complex RNA helicase	0.71536	5.50798e-06	3.03176e-05	0.133927	0.400555	0.745512
ENSMUSG00000002228.8	MGI:1919137	Ppm1j	protein phosphatase 1J	3.35469	1.45877e-08	1.47471e-07	1.00669	0.129041	0.474828
ENSMUSG00000002233.14	MGI:106028	Rhoc	ras homolog family member C	2.44212	2.54929e-17	2.52047e-15	0.291285	0.319621	0.688214
ENSMUSG00000002249.22	MGI:109241	Tead3	TEA domain family member 3	1.96916	2.61268e-10	4.07864e-09	0.668664	0.0411629	0.287639
ENSMUSG00000002250.17	MGI:101884	Ppard	peroxisome proliferator activator receptor delta	1.19467	6.87468e-13	1.88913e-11	0.253811	0.132916	0.480455
ENSMUSG00000002257.9	MGI:1346328	Def6	differentially expressed in FDCP 6	2.31995	2.74928e-10	4.26873e-09	0.561281	0.143578	0.496645
ENSMUSG00000002274.14	MGI:1917333	Metrn	meteorin, glial cell differentiation regulator	1.36315	2.50765e-16	1.70159e-14	0.281556	0.0929643	0.414976
ENSMUSG00000002289.17	MGI:1888999	Angptl4	angiopoietin-like 4	2.18699	1.30304e-07	1.06961e-06	-0.0895269	0.835879	0.951472
ENSMUSG00000002297.17	MGI:1351328	Dbf4	DBF4 zinc finger	2.04456	5.29932e-10	7.66935e-09	0.85156	0.0151117	0.178632
ENSMUSG00000002320.16	MGI:1921390	Tm9sf1	transmembrane 9 superfamily member 1	0.6197	3.64307e-08	3.36809e-07	0.0176917	0.876405	0.965414
ENSMUSG00000002332.17	MGI:1196314	Dhrs1	dehydrogenase/reductase (SDR family) member 1	2.8241	7.29502e-20	1.89086e-17	0.454579	0.142909	0.496217
ENSMUSG00000002341.9	MGI:104694	Ncan	neurocan	1.20876	3.05152e-22	2.09037e-19	0.137932	0.269383	0.645514
ENSMUSG00000002365.11	MGI:1913866	Snx9	sorting nexin 9	0.913271	6.4828e-09	7.1572e-08	-0.00771666	0.961638	0.990107
ENSMUSG00000002458.14	MGI:1915153	Rgs19	regulator of G-protein signaling 19	0.641626	8.18746e-08	6.99826e-07	0.0501876	0.68109	0.898682
ENSMUSG00000002459.18	MGI:1929866	Rgs20	regulator of G-protein signaling 20	1.08048	4.29886e-14	1.5538e-12	0.487641	0.000833772	0.0336489
ENSMUSG00000002602.17	MGI:1347244	Axl	AXL receptor tyrosine kinase	2.09749	1.90884e-23	2.38779e-20	0.296449	0.160151	0.52159
ENSMUSG00000002603.16	MGI:98725	Tgfb1	transforming growth factor, beta 1	3.21409	2.96549e-18	3.98692e-16	1.17207	0.0019306	0.0569885
ENSMUSG00000002668.9	MGI:1918035	Dennd1c	DENN/MADD domain containing 1C	2.75654	2.43055e-13	7.46311e-12	1.11179	0.0044149	0.0898768
ENSMUSG00000002699.14	MGI:1321402	Lcp2	lymphocyte cytosolic protein 2	3.53759	9.44149e-18	1.06945e-15	0.615381	0.142466	0.495752
ENSMUSG00000002732.15	MGI:1336879	Fkbp7	FK506 binding protein 7	1.09442	5.57062e-08	4.95279e-07	0.274885	0.206228	0.580037
ENSMUSG00000002804.5	MGI:1913424	Nudt14	nudix (nucleoside diphosphate linked moiety X)-type motif 14	1.25823	2.35077e-10	3.70801e-09	0.4229	0.040205	0.284338
ENSMUSG00000002812.5	MGI:1342286	Flii	flightless I actin binding protein	0.770308	1.36656e-06	8.73715e-06	0.26269	0.101502	0.429595
ENSMUSG00000002814.16	MGI:1197527	Top3a	topoisomerase (DNA) III alpha	0.72839	5.37141e-07	3.78499e-06	0.391154	0.00867823	0.132336
ENSMUSG00000002847.8	MGI:1934677	Pla1a	phospholipase A1 member A	1.38649	0.000305883	0.00112215	0.460378	0.256746	0.633753
ENSMUSG00000002870.9	MGI:105380	Mcm2	minichromosome maintenance complex component 2	1.75121	2.01922e-13	6.30781e-12	0.505447	0.0381649	0.278756
ENSMUSG00000002881.15	MGI:107564	Nab1	Ngfi-A binding protein 1	0.62837	4.48911e-08	4.06152e-07	0.111628	0.340275	0.705651
ENSMUSG00000002885.15	MGI:1347095	Adgre5	adhesion G protein-coupled receptor E5	1.27531	1.07884e-11	2.2975e-10	0.291284	0.12733	0.471381
ENSMUSG00000002897.6	MGI:107399	Il17ra	interleukin 17 receptor A	1.72023	5.73049e-12	1.28907e-10	0.463704	0.0678369	0.36014
ENSMUSG00000002944.16	MGI:107899	Cd36	CD36 molecule	2.0526	0.000648221	0.00220971	0.362526	0.559851	0.841936
ENSMUSG00000002980.15	MGI:1929940	Bcam	basal cell adhesion molecule	0.674633	0.00115632	0.00370101	0.272029	0.194057	0.566393
ENSMUSG00000002983.18	MGI:103289	Relb	avian reticuloendotheliosis viral (v-rel) oncogene related B	1.80864	1.29569e-11	2.72104e-10	0.644305	0.0187188	0.199235
ENSMUSG00000002985.17	MGI:88057	Apoe	apolipoprotein E	2.70352	4.60237e-16	2.85377e-14	0.637298	0.0555848	0.328438
ENSMUSG00000002992.18	MGI:88054	Apoc2	apolipoprotein C-II	7.13783	5.50697e-09	6.19394e-08	1.83888	0.249006	0.626726
ENSMUSG00000002996.18	MGI:894659	Hbp1	high mobility group box transcription factor 1	0.625839	3.48392e-06	2.00632e-05	0.0735735	0.589567	0.85927
ENSMUSG00000003037.17	MGI:96960	Rab8a	RAB8A, member RAS oncogene family	0.617384	1.70503e-09	2.16103e-08	0.0288129	0.782175	0.932907
ENSMUSG00000003123.16	MGI:96790	Lipe	lipase, hormone sensitive	1.1294	2.34554e-08	2.25471e-07	0.299168	0.146	0.499879
ENSMUSG00000003134.11	MGI:1927225	Tbc1d8	TBC1 domain family, member 8	1.60415	3.08403e-19	6.12553e-17	0.574705	0.00160902	0.0508982
ENSMUSG00000003184.16	MGI:1859179	Irf3	interferon regulatory factor 3	0.668656	2.73153e-06	1.61606e-05	0.105593	0.46338	0.78844
ENSMUSG00000003190.13	MGI:1922986	Bcl2l12	BCL2-like 12 (proline rich)	1.58942	2.4302e-07	1.86551e-06	0.438182	0.186708	0.55801
ENSMUSG00000003206.8	MGI:1354171	Ebi3	Epstein-Barr virus induced gene 3	3.15163	2.62146e-12	6.33501e-11	0.917412	0.0474958	0.306569
ENSMUSG00000003283.16	MGI:96052	Hck	hemopoietic cell kinase	3.5544	2.13325e-18	3.05351e-16	1.34846	0.00134316	0.0457229
ENSMUSG00000003348.11	MGI:3050117	Mob3a	MOB kinase activator 3A	1.61808	9.3634e-13	2.51301e-11	0.423817	0.0658943	0.354328
ENSMUSG00000003382.19	MGI:1350926	Etv3	ets variant 3	1.11423	6.16608e-06	3.35866e-05	0.232642	0.346864	0.711107
ENSMUSG00000003420.9	MGI:103017	Fcgrt	Fc fragment of IgG receptor and transporter	1.13318	3.93917e-10	5.91513e-09	0.233258	0.20379	0.577053
ENSMUSG00000003429.12	MGI:1351329	Rps11	ribosomal protein S11	0.888752	1.76494e-10	2.86887e-09	0.0919194	0.510559	0.816641
ENSMUSG00000003458.13	MGI:1891700	Ncstn	nicastrin	0.760303	3.30017e-12	7.82118e-11	0.0210825	0.848002	0.95585
ENSMUSG00000003484.5	MGI:1919304	Cyp4f18	cytochrome P450, family 4, subfamily f, polypeptide 18	7.03841	2.47674e-12	6.02863e-11	3.09188	0.0222135	0.214543
ENSMUSG00000003528.16	MGI:1345283	Slc25a1	solute carrier family 25 (mitochondrial carrier, citrate transporter), member 1	0.927395	9.9553e-11	1.70694e-09	0.330709	0.0226753	0.216515
ENSMUSG00000003541.7	MGI:104814	Ier3	immediate early response 3	1.481	3.67897e-06	2.106e-05	0.404841	0.226116	0.602714
ENSMUSG00000003545.4	MGI:95575	Fosb	FBJ osteosarcoma oncogene B	1.99854	5.74096e-08	5.08703e-07	0.752926	0.0436249	0.295049
ENSMUSG00000003546.11	MGI:1922014	Klc4	kinesin light chain 4	0.854414	5.83548e-10	8.35286e-09	0.240199	0.0879833	0.404449
ENSMUSG00000003559.9	MGI:1929882	As3mt	arsenite methyltransferase	1.31634	6.12598e-15	2.74534e-13	0.428602	0.0142768	0.173901
ENSMUSG00000003617.17	MGI:88476	Cp	ceruloplasmin	1.57868	9.9308e-07	6.57884e-06	0.0225714	0.944568	0.986487
ENSMUSG00000003623.5	MGI:1921364	Crot	carnitine O-octanoyltransferase	0.616829	2.28839e-06	1.38086e-05	-0.0506495	0.70083	0.90587
ENSMUSG00000003644.18	MGI:104558	Rps6ka1	ribosomal protein S6 kinase polypeptide 1	2.38744	5.09632e-18	6.23941e-16	0.673235	0.015751	0.183052
ENSMUSG00000003762.14	MGI:1924139	Coq8b	coenzyme Q8B	0.601516	4.57886e-06	2.57122e-05	0.392473	0.00305981	0.0740337
ENSMUSG00000003779.17	MGI:1201682	Kif20a	kinesin family member 20A	3.43929	1.38107e-16	1.03207e-14	1.38047	0.00189793	0.0562653
ENSMUSG00000003812.14	MGI:1329019	Dnase2a	deoxyribonuclease II alpha	3.12548	5.0048e-21	2.03279e-18	0.748318	0.0262068	0.233467
ENSMUSG00000003814.9	MGI:88252	Calr	calreticulin	0.727009	0.000129565	0.000518532	-0.0297953	0.875437	0.96527
ENSMUSG00000003849.9	MGI:103187	Nqo1	NAD(P)H dehydrogenase, quinone 1	0.639524	2.31944e-05	0.000111202	0.248652	0.111055	0.443786
ENSMUSG00000003873.12	MGI:99702	Bax	BCL2-associated X protein	0.682338	1.03527e-09	1.38926e-08	-0.0017116	0.987933	0.997376
ENSMUSG00000003882.6	MGI:96562	Il7r	interleukin 7 receptor	1.95119	0.000355935	0.00128618	0.371236	0.51654	0.819156
ENSMUSG00000004040.17	MGI:103038	Stat3	signal transducer and activator of transcription 3	1.33905	5.42153e-11	9.89739e-10	0.1765	0.389203	0.737199
ENSMUSG00000004043.15	MGI:103036	Stat5a	signal transducer and activator of transcription 5A	2.2544	3.79041e-15	1.80852e-13	0.524192	0.0826468	0.394668
ENSMUSG00000004044.10	MGI:1277968	Cavin1	caveolae associated 1	1.49854	2.41023e-08	2.30918e-07	0.487627	0.0716648	0.370118
ENSMUSG00000004054.10	MGI:1346880	Map3k11	mitogen-activated protein kinase kinase kinase 11	0.795907	5.42121e-07	3.81167e-06	0.366552	0.0234418	0.220172
ENSMUSG00000004098.8	MGI:1858212	Col5a3	collagen, type V, alpha 3	1.9402	6.62874e-06	3.58622e-05	0.539061	0.217695	0.594532
ENSMUSG00000004105.9	MGI:1347002	Angptl2	angiopoietin-like 2	2.92442	4.33883e-10	6.44797e-09	0.602504	0.209421	0.584056
ENSMUSG00000004207.15	MGI:97783	Psap	prosaposin	0.638318	1.63136e-08	1.62915e-07	0.105317	0.351633	0.714256
ENSMUSG00000004266.16	MGI:96055	Ptpn6	protein tyrosine phosphatase, non-receptor type 6	4.03365	6.89591e-23	6.19482e-20	1.03348	0.0125221	0.161435
ENSMUSG00000004270.14	MGI:1315211	Lpcat3	lysophosphatidylcholine acyltransferase 3	1.14901	6.13833e-12	1.3733e-10	0.126897	0.452955	0.781955
ENSMUSG00000004451.15	MGI:1927244	Ralb	v-ral simian leukemia viral oncogene B	1.44239	8.08933e-12	1.76718e-10	0.265153	0.215074	0.591283
ENSMUSG00000004460.18	MGI:1915088	Dnajb11	DnaJ heat shock protein family (Hsp40) member B11	0.66128	2.42006e-05	0.000115411	-0.0603417	0.701723	0.906145
ENSMUSG00000004508.7	MGI:1333854	Gab2	growth factor receptor bound protein 2-associated protein 2	1.42995	1.11969e-10	1.90056e-09	0.470909	0.0352935	0.269501
ENSMUSG00000004552.17	MGI:107361	Ctse	cathepsin E	7.02459	1.52269e-07	1.22612e-06	2.58542	0.082288	0.394028
ENSMUSG00000004562.17	MGI:2685515	Arhgef40	Rho guanine nucleotide exchange factor (GEF) 40	1.556	1.2007e-14	4.97773e-13	0.412326	0.0430848	0.294161
ENSMUSG00000004612.10	MGI:1931250	Nkg7	natural killer cell group 7 sequence	4.95372	3.15361e-05	0.000146272	0.796454	0.557322
ENSMUSG00000004626.15	MGI:107370	Stxbp2	syntaxin binding protein 2	0.656173	1.09388e-06	7.16411e-06	0.312679	0.0212039	0.210744
ENSMUSG00000004631.16	MGI:1329042	Sgce	sarcoglycan, epsilon	0.59394	3.0422e-08	2.85012e-07	-0.00399008	0.970865	0.99235
ENSMUSG00000004633.18	MGI:1917243	Chn2	chimerin 2	1.0486	2.34913e-05	0.000112431	0.200822	0.422581	0.761339
ENSMUSG00000004665.11	MGI:105093	Cnn2	calponin 2	1.2872	3.51201e-05	0.000161412	0.379209	0.234347	0.61195
ENSMUSG00000004677.18	MGI:106624	Myo9b	myosin IXb	0.757737	2.81691e-08	2.65984e-07	0.276976	0.0431678	0.294161
ENSMUSG00000004709.15	MGI:109294	Cd244a	CD244 molecule A	5.43377	6.97186e-09	7.61062e-08	0.533722	0.644854	0.883553
ENSMUSG00000004730.16	MGI:106912	Adgre1	adhesion G protein-coupled receptor E1	3.89851	2.6869e-19	5.4826e-17	1.27237	0.00368047	0.08195
ENSMUSG00000004837.3	MGI:1918770	Grap	GRB2-related adaptor protein	2.12898	4.9739e-14	1.7799e-12	-0.0608704	0.832759	0.950497
ENSMUSG00000004846.11	MGI:1347008	Plod3	procollagen-lysine, 2-oxoglutarate 5-dioxygenase 3	1.53493	2.87866e-12	6.9076e-11	0.42309	0.0558659	0.328945
ENSMUSG00000004864.14	MGI:1346864	Mapk13	mitogen-activated protein kinase 13	3.29307	0.000717407	0.00241891	1.03306	0.377347
ENSMUSG00000004891.17	MGI:101784	Nes	nestin	2.06593	4.17184e-12	9.60223e-11	0.103294	0.731423	0.916236
ENSMUSG00000004951.11	MGI:96240	Hspb1	heat shock protein 1	2.42435	6.39513e-09	7.06855e-08	0.20601	0.63214	0.878085
ENSMUSG00000004952.14	MGI:1858600	Rasa4	RAS p21 protein activator 4	3.51001	8.75796e-20	2.1722e-17	1.51692	0.000134949	0.0102561
ENSMUSG00000005043.14	MGI:1350341	Sgsh	N-sulfoglucosamine sulfohydrolase (sulfamidase)	1.28567	1.03557e-06	6.83045e-06	0.392091	0.143262	0.496327
ENSMUSG00000005054.8	MGI:109514	Cstb	cystatin B	1.32233	1.74216e-10	2.83665e-09	0.121634	0.562957	0.843953
ENSMUSG00000005057.14	MGI:1345171	Sh2b2	SH2B adaptor protein 2	2.24883	1.52226e-12	3.88961e-11	0.771197	0.0180691	0.196181
ENSMUSG00000005087.18	MGI:88338	Cd44	CD44 antigen	5.25669	1.09751e-17	1.20521e-15	2.36411	0.00015225	0.0111164
ENSMUSG00000005107.14	MGI:2152844	Slc2a9	solute carrier family 2 (facilitated glucose transporter), member 9	0.70171	0.00259371	0.0075814	-0.385752	0.104387	0.433995
ENSMUSG00000005124.11	MGI:1197008	Ccn4	cellular communication network factor 4	1.57452	0.00128298	0.00406215	1.77057	0.000306277	0.0178774
ENSMUSG00000005131.5	MGI:1922561	4930550C14Rik	RIKEN cDNA 4930550C14 gene	1.4926	0.000591861	0.00203349	1.08805	0.0299392	0.250459
ENSMUSG00000005142.11	MGI:107286	Man2b1	mannosidase 2, alpha B1	2.27734	1.16902e-16	9.01709e-15	0.576186	0.0364445	0.273937
ENSMUSG00000005202.3	MGI:98295	Shbg	sex hormone binding globulin	4.59959	0.0020358	0.00612132	0.288388	0.848613
ENSMUSG00000005233.17	MGI:1913692	Spc25	SPC25, NDC80 kinetochore complex component, homolog (S. cerevisiae)	3.41382	1.57232e-11	3.23112e-10	1.35733	0.0123913	0.160365
ENSMUSG00000005251.16	MGI:1919638	Ripk4	receptor-interacting serine-threonine kinase 4	1.63105	0.00106716	0.00344208	0.233466	0.653924	0.887198
ENSMUSG00000005320.10	MGI:95525	Fgfr4	fibroblast growth factor receptor 4	6.34997	8.3761e-08	7.13618e-07	0.82497	0.439177
ENSMUSG00000005360.15	MGI:99917	Slc1a3	solute carrier family 1 (glial high affinity glutamate transporter), member 3	0.775509	5.1273e-12	1.16064e-10	0.0472413	0.674329	0.896171
ENSMUSG00000005373.14	MGI:1927999	Mlxipl	MLX interacting protein-like	2.29347	2.376e-12	5.80305e-11	0.790604	0.0188904	0.200127
ENSMUSG00000005397.9	MGI:97342	Nid1	nidogen 1	2.20993	4.59147e-10	6.75674e-09	0.536109	0.132931	0.480455
ENSMUSG00000005410.7	MGI:103197	Mcm5	minichromosome maintenance complex component 5	1.65687	1.21175e-12	3.14367e-11	0.232756	0.331147	0.698351
ENSMUSG00000005413.9	MGI:96163	Hmox1	heme oxygenase 1	2.41154	1.07173e-12	2.83222e-11	0.470944	0.170335	0.535712
ENSMUSG00000005470.9	MGI:1914179	Asf1b	anti-silencing function 1B histone chaperone	3.21376	2.30869e-10	3.6505e-09	0.210178	0.714649	0.911328
ENSMUSG00000005481.19	MGI:1915528	Ddx39a	DEAD box helicase 39a	0.668109	1.40321e-08	1.42556e-07	-0.0380313	0.753231	0.922232
ENSMUSG00000005615.16	MGI:88557	Pcyt1a	phosphate cytidylyltransferase 1, choline, alpha isoform	0.626601	1.56691e-14	6.25266e-13	0.113017	0.176511	0.545261
ENSMUSG00000005656.10	MGI:1919433	Snx6	sorting nexin 6	0.71525	3.72255e-09	4.36436e-08	0.219825	0.0725997	0.37218
ENSMUSG00000005667.9	MGI:1338850	Mthfd2	methylenetetrahydrofolate dehydrogenase (NAD+ dependent), methenyltetrahydrofolate cyclohydrolase	1.00167	1.32642e-05	6.71756e-05	0.11676	0.62019	0.87248
ENSMUSG00000005686.18	MGI:1096344	Ampd3	adenosine monophosphate deaminase 3	1.76968	1.31099e-18	2.04604e-16	0.370385	0.0681723	0.360938
ENSMUSG00000005763.16	MGI:88334	Cd247	CD247 antigen	2.469	0.000363808	0.0013115	0.142331	0.859571
ENSMUSG00000005800.4	MGI:1202395	Mmp8	matrix metallopeptidase 8	5.72365	0.00131618	0.00415353	-0.789298	0.695088
ENSMUSG00000005803.15	MGI:1929899	Sqor	sulfide quinone oxidoreductase	2.15051	6.22223e-15	2.78413e-13	0.382773	0.174548	0.541737
ENSMUSG00000005823.10	MGI:1925558	Gpr108	G protein-coupled receptor 108	0.675763	5.80912e-10	8.32342e-09	0.0892594	0.423334	0.761815
ENSMUSG00000005892.5	MGI:98823	Trh	thyrotropin releasing hormone	8.68736	6.30646e-17	5.34369e-15	0.946251	0.404513	0.748686
ENSMUSG00000005917.16	MGI:97450	Otx1	orthodenticle homeobox 1	1.07269	1.89118e-07	1.4895e-06	0.26503	0.212737	0.588457
ENSMUSG00000005947.12	MGI:1298377	Itgae	integrin alpha E, epithelial-associated	2.42654	8.95997e-06	4.71275e-05	0.392745	0.531969	0.826546
ENSMUSG00000005950.15	MGI:2137026	P2rx5	purinergic receptor P2X, ligand-gated ion channel, 5	2.05602	0.000155438	0.000609281	0.377354	0.49007	0.804365
ENSMUSG00000005952.16	MGI:1341787	Trpv1	transient receptor potential cation channel, subfamily V, member 1	4.07018	4.07517e-07	2.96833e-06	0.551894	0.483383	0.802067
ENSMUSG00000005973.7	MGI:104559	Rcn1	reticulocalbin 1	1.53437	1.2995e-11	2.72507e-10	0.265131	0.247803	0.625486
ENSMUSG00000005983.16	MGI:1920511	1700037C18Rik	RIKEN cDNA 1700037C18 gene	0.81546	0.00171277	0.00524346	0.356682	0.185036	0.556292
ENSMUSG00000006019.16	MGI:1918973	Dhx34	DEAH (Asp-Glu-Ala-His) box polypeptide 34	0.693976	5.60948e-07	3.92964e-06	0.359133	0.011976	0.157791
ENSMUSG00000006143.13	MGI:1916915	Upk3bl	uroplakin 3B-like	4.45025	0.000503899	0.00176071	0.616201	0.589635
ENSMUSG00000006204.8	MGI:1918645	Cdcp3	CUB domain containing protein 3	5.15867	1.2921e-05	6.56106e-05	4.86527	0.000300748	0.0177285
ENSMUSG00000006205.14	MGI:1929076	Htra1	HtrA serine peptidase 1	0.623889	1.64107e-06	1.02933e-05	-0.220808	0.0908783	0.409518
ENSMUSG00000006219.13	MGI:1921452	Fblim1	filamin binding LIM protein 1	4.37521	2.42927e-18	3.39285e-16	1.33675	0.0101543	0.14345
ENSMUSG00000006281.9	MGI:109573	Tep1	telomerase associated protein 1	2.35172	1.30142e-14	5.32621e-13	0.588492	0.0581689	0.33509
ENSMUSG00000006301.18	MGI:1916910	Tmbim1	transmembrane BAX inhibitor motif containing 1	1.13242	4.29492e-07	3.10553e-06	0.214778	0.34209	0.706738
ENSMUSG00000006333.15	MGI:1924096	Rps9	ribosomal protein S9	0.937074	8.21835e-11	1.44089e-09	0.11692	0.418514	0.758376
ENSMUSG00000006344.18	MGI:1346063	Ggt5	gamma-glutamyltransferase 5	1.55805	3.98413e-07	2.91006e-06	0.559228	0.0810501	0.39166
ENSMUSG00000006345.11	MGI:95706	Ggt1	gamma-glutamyltransferase 1	1.0026	0.00019736	0.000755688	0.237114	0.398705	0.744382
ENSMUSG00000006360.12	MGI:88501	Crip1	cysteine-rich protein 1 (intestinal)	1.46058	3.24717e-06	1.88166e-05	0.216235	0.501641	0.81185
ENSMUSG00000006369.15	MGI:95487	Fbln1	fibulin 1	1.24588	2.22973e-07	1.72404e-06	0.270161	0.264982	0.64159
ENSMUSG00000006390.16	MGI:1858959	Elovl1	elongation of very long chain fatty acids (FEN1/Elo2, SUR4/Elo3, yeast)-like 1	1.24254	4.74248e-10	6.94381e-09	0.31097	0.124656	0.467043
ENSMUSG00000006395.17	MGI:1915430	Hyi	hydroxypyruvate isomerase (putative)	1.47346	1.22462e-09	1.61251e-08	0.380454	0.132248	0.47941
ENSMUSG00000006398.16	MGI:1859866	Cdc20	cell division cycle 20	3.24746	1.30363e-10	2.18062e-09	0.953143	0.0675391	0.359033
ENSMUSG00000006403.14	MGI:1339949	Adamts4	a disintegrin-like and metallopeptidase (reprolysin type) with thrombospondin type 1 motif, 4	1.14397	3.07985e-05	0.000143081	0.795028	0.00401716	0.0854056
ENSMUSG00000006411.13	MGI:1918990	Nectin4	nectin cell adhesion molecule 4	0.996866	1.02016e-06	6.7381e-06	0.265538	0.203079	0.57596
ENSMUSG00000006445.4	MGI:95278	Epha2	Eph receptor A2	2.70061	2.34206e-12	5.72988e-11	0.197835	0.624067	0.874367
ENSMUSG00000006498.17	MGI:97791	Ptbp1	polypyrimidine tract binding protein 1	1.32596	1.66159e-14	6.58479e-13	0.2809	0.107109	0.438341
ENSMUSG00000006519.12	MGI:1316658	Cyba	cytochrome b-245, alpha polypeptide	3.79499	2.18602e-21	1.08438e-18	1.37174	0.000709385	0.0306391
ENSMUSG00000006522.18	MGI:96620	Itih3	inter-alpha trypsin inhibitor, heavy chain 3	1.0743	7.49816e-09	8.101e-08	0.401346	0.0326809	0.261205
ENSMUSG00000006567.12	MGI:103297	Atp7b	ATPase, Cu++ transporting, beta polypeptide	0.903938	0.000295287	0.00108668	0.229357	0.369069	0.725051
ENSMUSG00000006585.4	MGI:1914427	Cdt1	chromatin licensing and DNA replication factor 1	2.75452	8.19672e-12	1.78657e-10	0.991273	0.0200653	0.206036
ENSMUSG00000006589.9	MGI:88061	Aprt	adenine phosphoribosyl transferase	0.648565	1.39253e-08	1.41621e-07	0.196071	0.0911799	0.410111
ENSMUSG00000006611.16	MGI:109191	Hfe	homeostatic iron regulator	2.22677	8.85361e-15	3.80758e-13	0.525291	0.0740461	0.376202
ENSMUSG00000006678.7	MGI:99660	Pola1	polymerase (DNA directed), alpha 1	0.696755	0.000224732	0.000849528	0.102154	0.600398	0.864503
ENSMUSG00000006715.12	MGI:1927344	Gmnn	geminin	1.49404	2.67931e-07	2.03448e-06	0.261931	0.404488	0.748686
ENSMUSG00000006728.13	MGI:88357	Cdk4	cyclin-dependent kinase 4	0.768811	1.11766e-10	1.89824e-09	0.20602	0.0866067	0.401918
ENSMUSG00000006736.10	MGI:1914375	Tspan31	tetraspanin 31	0.770124	8.466e-11	1.4816e-09	-0.0123209	0.918092	0.978281
ENSMUSG00000006764.9	MGI:2651811	Tph2	tryptophan hydroxylase 2	0.931953	0.000877654	0.00289875	0.433818	0.1392	0.490836
ENSMUSG00000006782.17	MGI:88437	Cnp	2',3'-cyclic nucleotide 3' phosphodiesterase	0.912808	9.59077e-05	0.00039646	0.718582	0.00215489	0.060636
ENSMUSG00000006800.15	MGI:1919293	Sulf2	sulfatase 2	1.63956	3.40257e-06	1.96261e-05	0.448103	0.204516	0.577755
ENSMUSG00000006931.16	MGI:1913430	P3h4	prolyl 3-hydroxylase family member 4 (non-enzymatic)	0.839367	1.09717e-13	3.62836e-12	0.145205	0.234526	0.612024
ENSMUSG00000007030.9	MGI:1306798	Vwa7	von Willebrand factor A domain containing 7	1.99096	0.000112402	0.000455674	1.14892	0.0418763	0.290437
ENSMUSG00000007041.10	MGI:2148924	Clic1	chloride intracellular channel 1	3.16278	3.18319e-18	4.16289e-16	0.736824	0.044608	0.298586
ENSMUSG00000007080.15	MGI:1196391	Pole	polymerase (DNA directed), epsilon	1.46162	7.61737e-10	1.06182e-08	0.337849	0.168736	0.533711
ENSMUSG00000007097.15	MGI:88106	Atp1a2	ATPase, Na+/K+ transporting, alpha 2 polypeptide	0.608051	8.55015e-13	2.30766e-11	-0.0916418	0.281474	0.656309
ENSMUSG00000007107.7	MGI:1351335	Atp1a4	ATPase, Na+/K+ transporting, alpha 4 polypeptide	0.808827	6.8356e-11	1.22078e-09	0.194609	0.135214	0.485142
ENSMUSG00000007122.12	MGI:1309468	Casq1	calsequestrin 1	2.04813	0.000286787	0.00105838	0.428048	0.504784	0.813101
ENSMUSG00000007379.16	MGI:3036254	Dennd2c	DENN/MADD domain containing 2C	3.54194	1.21397e-10	2.04491e-09	-0.217946	0.704117	0.906801
ENSMUSG00000007476.19	MGI:2652847	Lrrc8a	leucine rich repeat containing 8A VRAC subunit A	0.594787	7.63239e-07	5.19497e-06	0.450938	0.000194999	0.0132979
ENSMUSG00000007613.16	MGI:98728	Tgfbr1	transforming growth factor, beta receptor I	1.49097	1.02159e-10	1.74538e-09	0.165474	0.474747	0.79599
ENSMUSG00000007655.17	MGI:102709	Cav1	caveolin 1, caveolae protein	2.50948	2.81852e-14	1.05588e-12	0.334144	0.3135	0.683822
ENSMUSG00000007815.14	MGI:1096342	Rhoa	ras homolog family member A	0.938293	3.17879e-13	9.48724e-12	0.0654491	0.61268	0.869059
ENSMUSG00000007833.16	MGI:1916998	Aldh16a1	aldehyde dehydrogenase 16 family, member A1	1.53788	1.42701e-11	2.96866e-10	0.349712	0.138388	0.490138
ENSMUSG00000007837.12	MGI:1929596	Prrg2	proline-rich Gla (G-carboxyglutamic acid) polypeptide 2	0.966357	6.48527e-07	4.48313e-06	0.376071	0.0667598	0.357304
ENSMUSG00000007867.10	MGI:1923661	Ift43	intraflagellar transport 43	0.898066	8.04565e-08	6.90165e-07	0.307949	0.076715	0.382065
ENSMUSG00000007872.4	MGI:96398	Id3	inhibitor of DNA binding 3	1.56018	4.39589e-09	5.0752e-08	0.417278	0.11839	0.456844
ENSMUSG00000007877.3	MGI:1330233	Tcap	titin-cap	1.91088	0.00275739	0.00800854	1.5985	0.0351666
ENSMUSG00000007891.17	MGI:88562	Ctsd	cathepsin D	4.47065	3.51809e-25	1.01219e-21	0.889885	0.0390999	0.281257
ENSMUSG00000008035.13	MGI:1915291	Mid1ip1	Mid1 interacting protein 1 (gastrulation specific G12-like (zebrafish))	0.697655	2.76434e-09	3.32496e-08	0.17128	0.148153	0.503336
ENSMUSG00000008090.15	MGI:2150920	Fgfrl1	fibroblast growth factor receptor-like 1	2.11885	1.75195e-18	2.62527e-16	0.180537	0.460231	0.786125
ENSMUSG00000008384.9	MGI:1913438	Sertad1	SERTA domain containing 1	1.24928	5.20346e-11	9.55994e-10	0.644318	0.00099658	0.0374762
ENSMUSG00000008393.10	MGI:1196368	Carhsp1	calcium regulated heat stable protein 1	0.871061	1.83298e-06	1.13681e-05	0.224674	0.221657	0.598443
ENSMUSG00000008398.17	MGI:101762	Elk3	ELK3, member of ETS oncogene family	2.2259	2.56317e-17	2.52551e-15	0.684044	0.00988475	0.141881
ENSMUSG00000008496.20	MGI:101897	Pou2f2	POU domain, class 2, transcription factor 2	1.62012	1.73946e-10	2.83386e-09	0.259097	0.311865	0.682008
ENSMUSG00000008540.12	MGI:1913850	Mgst1	microsomal glutathione S-transferase 1	1.66834	1.61225e-14	6.40691e-13	0.825067	0.000220356	0.0143968
ENSMUSG00000008668.16	MGI:98146	Rps18	ribosomal protein S18	0.732805	5.37702e-10	7.76229e-09	0.0562175	0.635152	0.879543
ENSMUSG00000008682.14	MGI:105943	Rpl10	ribosomal protein L10	0.78272	7.43641e-11	1.31826e-09	0.0396437	0.742433	0.919454
ENSMUSG00000008999.8	MGI:103302	Bmp7	bone morphogenetic protein 7	1.83443	6.38555e-07	4.41844e-06	0.233427	0.534821	0.828164
ENSMUSG00000009035.16	MGI:2445179	Tmem184b	transmembrane protein 184b	0.713466	3.0456e-10	4.69084e-09	0.187167	0.10094	0.42907
ENSMUSG00000009097.11	MGI:98493	Tbx1	T-box 1	1.44611	7.66263e-05	0.000324829	0.887983	0.0176628	0.193547
ENSMUSG00000009108.16	MGI:95779	Gnat2	guanine nucleotide binding protein, alpha transducing 2	4.89976	4.08186e-05	0.000184856	1.12497	0.430452
ENSMUSG00000009145.7	MGI:2136388	Dqx1	DEAQ RNA-dependent ATPase	1.51288	0.000198066	0.00075819	0.410258	0.311197	0.681574
ENSMUSG00000009185.3	MGI:101878	Ccl8	chemokine (C-C motif) ligand 8	4.52337	7.2518e-05	0.000308961	2.73409	0.0479437	0.308329
ENSMUSG00000009214.10	MGI:1913389	Mymk	myomaker, myoblast fusion factor	2.1364	2.67652e-06	1.58645e-05	0.4221	0.362818	0.721273
ENSMUSG00000009281.7	MGI:1918910	Rarres2	retinoic acid receptor responder (tazarotene induced) 2	1.68804	6.36694e-08	5.59338e-07	0.935815	0.00401804	0.0854056
ENSMUSG00000009291.14	MGI:2652132	Pttg1ip	pituitary tumor-transforming 1 interacting protein	0.932405	2.97657e-12	7.11877e-11	0.292138	0.0298323	0.250071
ENSMUSG00000009356.13	MGI:1923363	Lpo	lactoperoxidase	3.26712	4.97315e-15	2.28202e-13	1.25463	0.00702202	0.116543
ENSMUSG00000009376.16	MGI:96969	Met	met proto-oncogene	1.9365	1.01319e-06	6.69663e-06	1.45958	0.000386114	0.0211065
ENSMUSG00000009545.15	MGI:108083	Kcnq1	potassium voltage-gated channel, subfamily Q, member 1	1.5543	0.000933406	0.0030611	0.117983	0.805988	0.941709
ENSMUSG00000009585.19	MGI:1933111	Apobec3	apolipoprotein B mRNA editing enzyme, catalytic polypeptide 3	3.07824	1.10208e-18	1.78134e-16	1.00378	0.00472279	0.0932955
ENSMUSG00000009614.17	MGI:2183102	Sardh	sarcosine dehydrogenase	1.41496	1.77935e-13	5.63187e-12	0.259753	0.182194	0.552247
ENSMUSG00000009621.19	MGI:102718	Vav2	vav 2 oncogene	1.82697	5.27024e-15	2.40301e-13	0.730216	0.00197451	0.0577894
ENSMUSG00000009670.12	MGI:1933237	Tex11	testis expressed gene 11	1.58155	0.000953566	0.00311939	0.685372	0.170773	0.536273
ENSMUSG00000009687.15	MGI:1201785	Fxyd5	FXYD domain-containing ion transport regulator 5	2.08384	7.67496e-09	8.27647e-08	-0.00551457	0.987964	0.997376
ENSMUSG00000009772.16	MGI:1921387	Nuak2	NUAK family, SNF1-like kinase, 2	2.05028	1.75985e-07	1.39676e-06	0.609359	0.147359	0.502373
ENSMUSG00000009828.16	MGI:1934157	Cilk1	ciliogenesis associated kinase 1	0.690195	4.38271e-07	3.16186e-06	0.505267	0.00024335	0.0151001
ENSMUSG00000009876.14	MGI:2135755	Cox4i2	cytochrome c oxidase subunit 4I2	1.31883	2.04578e-05	9.929e-05	0.228349	0.484806	0.802857
ENSMUSG00000010021.14	MGI:2447024	Kif19a	kinesin family member 19A	1.37885	1.34182e-05	6.78719e-05	0.931654	0.0043723	0.0892735
ENSMUSG00000010047.13	MGI:1196334	Hyal2	hyaluronoglucosaminidase 2	0.83831	3.3293e-09	3.94512e-08	0.243527	0.0971265	0.422778
ENSMUSG00000010051.16	MGI:96298	Hyal1	hyaluronoglucosaminidase 1	0.759079	1.03629e-05	5.37692e-05	0.0649444	0.714881	0.911328
ENSMUSG00000010064.16	MGI:1923507	Slc38a3	solute carrier family 38, member 3	1.90943	3.24159e-17	2.99015e-15	0.351734	0.121222	0.461289
ENSMUSG00000010067.14	MGI:1928386	Rassf1	Ras association (RalGDS/AF-6) domain family member 1	0.591483	7.71974e-06	4.11839e-05	0.0146949	0.913573	0.977382
ENSMUSG00000010095.14	MGI:96955	Slc3a2	solute carrier family 3 (activators of dibasic and neutral amino acid transport), member 2	0.781467	6.72933e-09	7.38404e-08	0.154196	0.254421	0.631918
ENSMUSG00000010142.13	MGI:1889411	Tnfrsf13b	tumor necrosis factor receptor superfamily, member 13b	2.7358	2.78668e-12	6.69804e-11	1.01012	0.0137118	0.169765
ENSMUSG00000010307.8	MGI:1915143	Tmem86a	transmembrane protein 86A	2.79231	1.86755e-18	2.72748e-16	0.648282	0.0435505	0.295049
ENSMUSG00000010311.16	MGI:2151113	Optc	opticin	1.93521	0.00331567	0.00942919	0.873183	0.202557	0.57539
ENSMUSG00000010358.14	MGI:1917360	Ifi35	interferon-induced protein 35	2.90602	4.92771e-15	2.26478e-13	1.07494	0.00494297	0.0962644
ENSMUSG00000010362.10	MGI:1913849	Rdm1	RAD52 motif 1	0.780838	0.000227997	0.00086074	0.152075	0.484614	0.802755
ENSMUSG00000010406.13	MGI:1916086	Mrpl52	mitochondrial ribosomal protein L52	0.69174	7.05074e-06	3.79526e-05	0.256935	0.10075	0.428708
ENSMUSG00000010461.17	MGI:1337104	Eya4	EYA transcriptional coactivator and phosphatase 4	1.56912	3.31087e-11	6.37171e-10	0.387202	0.111639	0.444272
ENSMUSG00000010476.15	MGI:894289	Ebf3	early B cell factor 3	1.25368	5.36066e-07	3.77833e-06	0.503626	0.0667002	0.357146
ENSMUSG00000010660.4	MGI:97614	Plcd1	phospholipase C, delta 1	0.998991	2.00744e-07	1.5727e-06	0.344049	0.0775909	0.383555
ENSMUSG00000010751.16	MGI:1930270	Tnfrsf22	tumor necrosis factor receptor superfamily, member 22	1.03753	1.16702e-05	5.97988e-05	0.513461	0.0393309	0.281599
ENSMUSG00000010830.9	MGI:2145953	Kdelr3	KDEL (Lys-Asp-Glu-Leu) endoplasmic reticulum protein retention receptor 3	2.71801	1.10454e-07	9.17928e-07	0.109873	0.840854	0.953494
ENSMUSG00000011008.14	MGI:1915529	Mcoln2	mucolipin 2	6.75935	1.21118e-05	6.18619e-05	1.38949	0.418052
ENSMUSG00000011148.15	MGI:87947	Adssl1	adenylosuccinate synthetase like 1	2.64044	2.72777e-13	8.27855e-12	0.556648	0.129099	0.474828
ENSMUSG00000011171.12	MGI:107166	Vipr2	vasoactive intestinal peptide receptor 2	1.47113	0.000267125	0.000993083	-0.309438	0.482622	0.801587
ENSMUSG00000011179.9	MGI:97402	Odc1	ornithine decarboxylase, structural 1	1.37161	1.54744e-14	6.19212e-13	0.297135	0.0976808	0.423698
ENSMUSG00000011884.14	MGI:1929253	Gltp	glycolipid transfer protein	2.12309	1.35339e-14	5.50755e-13	0.820775	0.00307732	0.074098
ENSMUSG00000011958.18	MGI:109327	Bnip2	BCL2/adenovirus E1B interacting protein 2	0.865838	2.45662e-12	5.98472e-11	0.11221	0.370556	0.725693
ENSMUSG00000012017.5	MGI:1858430	Scarf2	scavenger receptor class F, member 2	1.74081	4.28814e-07	3.10141e-06	0.676638	0.0605962	0.34145
ENSMUSG00000012428.10	MGI:1923560	Steap4	STEAP family member 4	3.29831	1.44576e-07	1.17172e-06	1.80571	0.0216909	0.212862
ENSMUSG00000012443.5	MGI:1098231	Kif11	kinesin family member 11	2.80086	9.99277e-17	7.96405e-15	0.750997	0.0308371	0.253254
ENSMUSG00000012519.15	MGI:1921818	Mlkl	mixed lineage kinase domain-like	3.7007	4.92607e-09	5.61521e-08	0.202641	0.765354	0.926266
ENSMUSG00000013076.18	MGI:1922973	Amotl1	angiomotin-like 1	1.57013	1.73085e-13	5.50258e-12	0.345174	0.107588	0.439518
ENSMUSG00000013089.16	MGI:1096867	Etv5	ets variant 5	0.956122	0.000332282	0.00120968	-0.148839	0.577386	0.852009
ENSMUSG00000013275.10	MGI:2444823	Slc41a1	solute carrier family 41, member 1	0.737228	3.99144e-10	5.97802e-09	-0.0702886	0.553891	0.838342
ENSMUSG00000013523.14	MGI:1924210	Bcas1	brain enriched myelin associated protein 1	1.36074	2.86054e-06	1.68304e-05	-0.102384	0.725236	0.914908
ENSMUSG00000013584.6	MGI:107928	Aldh1a2	aldehyde dehydrogenase family 1, subfamily A2	1.63814	0.0014502	0.0045289	0.424446	0.414937	0.755767
ENSMUSG00000013698.13	MGI:104799	Pea15a	proliferation and apoptosis adaptor protein 15A	0.779735	5.80082e-10	8.31594e-09	-0.0285966	0.820384	0.946276
ENSMUSG00000013707.4	MGI:1917019	Tnfaip8l2	tumor necrosis factor, alpha-induced protein 8-like 2	3.52621	5.81527e-18	6.88523e-16	0.914911	0.0293316	0.247784
ENSMUSG00000013766.12	MGI:1917524	Ly6g6e	lymphocyte antigen 6 complex, locus G6E	2.52267	0.000236413	0.000889128	2.07795	0.00278583	0.0696897
ENSMUSG00000014030.16	MGI:97489	Pax5	paired box 5	2.28801	0.000694182	0.00235107	1.67896	0.0284855
ENSMUSG00000014158.13	MGI:1926945	Trpv4	transient receptor potential cation channel, subfamily V, member 4	2.04885	7.53045e-08	6.50627e-07	-0.16116	0.682468	0.899279
ENSMUSG00000014303.14	MGI:1932535	Glis2	GLIS family zinc finger 2	0.873925	4.30407e-10	6.40291e-09	0.295041	0.0408459	0.286321
ENSMUSG00000014329.15	MGI:1933388	Bicc1	BicC family RNA binding protein 1	1.16503	3.08463e-06	1.79652e-05	0.138596	0.585334	0.857346
ENSMUSG00000014361.6	MGI:96965	Mertk	MER proto-oncogene tyrosine kinase	1.28251	7.11291e-09	7.73999e-08	-0.0170579	0.938863	0.984891
ENSMUSG00000014418.17	MGI:2180307	Hps5	HPS5, biogenesis of lysosomal organelles complex 2 subunit 2	0.788903	5.08959e-09	5.77353e-08	0.131891	0.335478	0.70129
ENSMUSG00000014444.18	MGI:3603204	Piezo1	piezo-type mechanosensitive ion channel component 1	2.23949	1.42964e-11	2.97132e-10	0.818559	0.0150073	0.178255
ENSMUSG00000014496.9	MGI:2145661	Ankrd28	ankyrin repeat domain 28	0.607796	2.43771e-08	2.33008e-07	0.271735	0.0129914	0.164487
ENSMUSG00000014599.11	MGI:1339753	Csf1	colony stimulating factor 1 (macrophage)	1.64558	1.13219e-13	3.73986e-12	0.0575279	0.796324	0.9391
ENSMUSG00000014778.11	MGI:2679008	Fhod1	formin homology 2 domain containing 1	2.70047	7.32991e-14	2.53168e-12	0.654549	0.0773092	0.383059
ENSMUSG00000014791.11	MGI:2679007	Elmo3	engulfment and cell motility 3	1.9954	9.78492e-10	1.31984e-08	0.527744	0.139939	0.49193
ENSMUSG00000014867.10	MGI:98445	Surf4	surfeit gene 4	0.757358	1.06448e-09	1.4258e-08	0.0652992	0.601037	0.864669
ENSMUSG00000015027.12	MGI:1355303	Galns	galactosamine (N-acetyl)-6-sulfate sulfatase	1.15738	1.43879e-09	1.86094e-08	-0.20216	0.29692	0.670481
ENSMUSG00000015085.9	MGI:1096863	Entpd2	ectonucleoside triphosphate diphosphohydrolase 2	1.39671	9.90663e-13	2.64646e-11	0.727143	0.000278346	0.0168171
ENSMUSG00000015112.16	MGI:1354721	Slc25a13	solute carrier family 25 (mitochondrial carrier, adenine nucleotide translocator), member 13	1.40686	1.94447e-06	1.19616e-05	0.0124819	0.96822	0.992181
ENSMUSG00000015133.18	MGI:2142227	Lrrk1	leucine-rich repeat kinase 1	2.76623	2.30893e-13	7.11246e-12	0.766761	0.045169	0.300105
ENSMUSG00000015149.15	MGI:1927664	Sirt2	sirtuin 2	1.13792	5.51944e-10	7.93206e-09	0.554484	0.00255941	0.0668586
ENSMUSG00000015243.5	MGI:99607	Abca1	ATP-binding cassette, sub-family A (ABC1), member 1	2.60186	4.2158e-16	2.64255e-14	0.97939	0.00224251	0.061948
ENSMUSG00000015247.11	MGI:1913786	Nipsnap3b	nipsnap homolog 3B	0.897982	5.36665e-08	4.78772e-07	0.195329	0.246789	0.624776
ENSMUSG00000015312.10	MGI:107776	Gadd45b	growth arrest and DNA-damage-inducible 45 beta	1.52195	7.647e-07	5.20123e-06	0.509228	0.103295	0.432061
ENSMUSG00000015314.11	MGI:1353620	Slamf6	SLAM family member 6	4.40494	2.72854e-12	6.56928e-11	2.02955	0.0033202	0.0777837
ENSMUSG00000015335.17	MGI:1913470	Zdhhc12	zinc finger, DHHC domain containing 12	0.846984	1.08495e-08	1.13098e-07	0.101145	0.519687	0.820789
ENSMUSG00000015340.11	MGI:88574	Cybb	cytochrome b-245, beta polypeptide	6.11222	2.75362e-19	5.55587e-17	0.491696	0.476033	0.797299
ENSMUSG00000015396.5	MGI:1328316	Cd83	CD83 antigen	1.1083	1.31326e-06	8.44334e-06	-0.132237	0.567385	0.84585
ENSMUSG00000015405.16	MGI:1917258	Ace2	angiotensin I converting enzyme (peptidyl-dipeptidase A) 2	1.0912	3.75063e-05	0.000171557	0.358925	0.177437	0.54673
ENSMUSG00000015437.6	MGI:109267	Gzmb	granzyme B	3.64224	0.00268422	0.007815	3.04312	0.0302349
ENSMUSG00000015452.15	MGI:893592	Ager	advanced glycosylation end product-specific receptor	1.64743	3.67225e-05	0.000168331	1.00837	0.019615	0.203884
ENSMUSG00000015467.15	MGI:1932094	Egfl8	EGF-like domain 8	0.81346	0.00230737	0.00682694	0.562054	0.0381073	0.278549
ENSMUSG00000015468.15	MGI:107471	Notch4	notch 4	1.3656	2.56677e-09	3.11597e-08	0.439721	0.060935	0.342521
ENSMUSG00000015533.10	MGI:96600	Itga2	integrin alpha 2	3.33597	2.42139e-09	2.9557e-08	1.52316	0.0112235	0.151941
ENSMUSG00000015575.16	MGI:1328318	Atp6v0e	ATPase, H+ transporting, lysosomal V0 subunit E	1.16429	1.11559e-11	2.36527e-10	0.0744699	0.667456	0.893472
ENSMUSG00000015652.10	MGI:1917608	Steap1	six transmembrane epithelial antigen of the prostate 1	2.33399	0.00330874	0.00941229	3.66967	0.00224404
ENSMUSG00000015714.12	MGI:1924143	Cers2	ceramide synthase 2	0.935491	2.43481e-08	2.32808e-07	0.211891	0.209123	0.583539
ENSMUSG00000015745.10	MGI:1914470	Plekho1	pleckstrin homology domain containing, family O member 1	1.53416	8.78132e-11	1.52473e-09	0.353421	0.138591	0.490138
ENSMUSG00000015750.16	MGI:2385110	Aph1a	aph1 homolog A, gamma secretase subunit	0.852627	1.35078e-12	3.48238e-11	0.0222172	0.855203	0.958405
ENSMUSG00000015776.13	MGI:98446	Med22	mediator complex subunit 22	0.882758	5.66391e-11	1.03006e-09	0.199587	0.142084	0.495576
ENSMUSG00000015839.7	MGI:108420	Nfe2l2	nuclear factor, erythroid derived 2, like 2	2.30128	1.28442e-15	7.06576e-14	0.561003	0.0531876	0.324005
ENSMUSG00000015843.11	MGI:98216	Rxrg	retinoid X receptor gamma	1.90004	0.00204116	0.00613391	1.51668	0.0126286	0.161802
ENSMUSG00000015846.16	MGI:98214	Rxra	retinoid X receptor alpha	0.666813	0.00120842	0.0038515	0.180375	0.38276	0.733049
ENSMUSG00000015850.12	MGI:2389008	Adamtsl4	ADAMTS-like 4	2.2425	3.62133e-10	5.48365e-09	0.653205	0.0738475	0.375378
ENSMUSG00000015852.14	MGI:1933397	Fcrls	Fc receptor-like S, scavenger receptor	3.78607	7.84677e-18	9.06664e-16	0.607646	0.168098	0.532904
ENSMUSG00000015854.8	MGI:1334419	Cd5l	CD5 antigen-like	10.8255	1.82064e-12	4.56377e-11	0.971379	0.616683	0.871283
ENSMUSG00000015880.14	MGI:1930197	Ncapg	non-SMC condensin I complex, subunit G	3.22177	2.62347e-11	5.1522e-10	1.3309	0.0134501	0.168948
ENSMUSG00000015947.11	MGI:95498	Fcgr1	Fc receptor, IgG, high affinity I	4.09437	8.52396e-20	2.13255e-17	1.65105	0.000302055	0.0177311
ENSMUSG00000015950.14	MGI:97283	Ncf1	neutrophil cytosolic factor 1	3.87888	5.75515e-23	5.51938e-20	1.03679	0.00893973	0.134051
ENSMUSG00000016028.12	MGI:1100883	Celsr1	cadherin, EGF LAG seven-pass G-type receptor 1	1.1643	6.07264e-10	8.65787e-09	0.445136	0.0198322	0.204999
ENSMUSG00000016087.14	MGI:95554	Fli1	Friend leukemia integration 1	2.22321	3.09508e-11	5.98847e-10	0.352727	0.301862	0.674417
ENSMUSG00000016206.7	MGI:95915	H2-M3	histocompatibility 2, M region locus 3	2.95012	1.19464e-14	4.96692e-13	1.11384	0.00477472	0.0937787
ENSMUSG00000016239.12	MGI:1921615	Lonrf3	LON peptidase N-terminal domain and ring finger 3	0.640292	0.000198179	0.000758419	-0.189767	0.278529	0.653917
ENSMUSG00000016256.11	MGI:1891190	Ctsz	cathepsin Z	4.07036	1.81967e-23	2.37971e-20	1.10508	0.00687	0.115598
ENSMUSG00000016356.19	MGI:1920618	Col20a1	collagen, type XX, alpha 1	2.11183	8.49728e-08	7.22872e-07	0.232392	0.557257	0.84085
ENSMUSG00000016487.16	MGI:1914783	Ppfibp1	PTPRF interacting protein, binding protein 1 (liprin beta 1)	0.770458	1.79156e-05	8.8096e-05	-0.0367491	0.838955	0.952754
ENSMUSG00000016494.10	MGI:88329	Cd34	CD34 antigen	0.88323	0.000181875	0.000702283	-0.106238	0.65355	0.886818
ENSMUSG00000016495.13	MGI:1915009	Plgrkt	plasminogen receptor, C-terminal lysine transmembrane protein	1.08994	1.23165e-11	2.59224e-10	0.292747	0.0735786	0.37438
ENSMUSG00000016496.8	MGI:1926446	Cd274	CD274 antigen	2.11555	3.74142e-15	1.79109e-13	0.992886	0.000416751	0.0220512
ENSMUSG00000016520.8	MGI:2155959	Lnx2	ligand of numb-protein X 2	0.662862	6.51041e-05	0.000280201	0.306322	0.0690712	0.363437
ENSMUSG00000016528.11	MGI:109298	Mapkapk2	MAP kinase-activated protein kinase 2	1.66636	3.32004e-15	1.61353e-13	0.251709	0.236791	0.614492
ENSMUSG00000016534.16	MGI:96748	Lamp2	lysosomal-associated membrane protein 2	1.78063	2.71762e-16	1.82258e-14	0.22643	0.299104	0.671809
ENSMUSG00000016559.15	MGI:1101768	H3f3b	H3.3 histone B	0.620521	8.60277e-10	1.17974e-08	0.0968745	0.339815	0.705475
ENSMUSG00000016624.16	MGI:2443812	Phf21b	PHD finger protein 21B	0.773706	0.00119493	0.00381189	-0.0708004	0.76954	0.928497
ENSMUSG00000016757.12	MGI:3039573	Ttll12	tubulin tyrosine ligase-like family, member 12	0.769263	1.84408e-09	2.32091e-08	0.258935	0.0471904	0.305768
ENSMUSG00000016758.5	MGI:1206591	Bik	BCL2-interacting killer	4.16248	9.91348e-05	0.00040814	2.35852	0.0894112
ENSMUSG00000016918.16	MGI:2138563	Sulf1	sulfatase 1	4.07824	6.54619e-17	5.47502e-15	1.68873	0.00062639	0.0284312
ENSMUSG00000016946.7	MGI:1916509	Kctd5	potassium channel tetramerisation domain containing 5	1.13567	1.89509e-12	4.73297e-11	0.349928	0.0315631	0.256969
ENSMUSG00000016995.18	MGI:1328314	Matn4	matrilin 4	2.39207	1.28182e-09	1.6771e-08	-0.12402	0.755491	0.922896
ENSMUSG00000017002.15	MGI:109297	Slpi	secretory leukocyte peptidase inhibitor	2.78164	4.67714e-05	0.000208371	-0.208462	0.780129	0.932335
ENSMUSG00000017007.10	MGI:1196616	Rbpjl	recombination signal binding protein for immunoglobulin kappa J region-like	1.83612	0.000326296	0.00118969	0.0805818	0.883751	0.967738
ENSMUSG00000017009.4	MGI:1349164	Sdc4	syndecan 4	1.58702	4.75345e-12	1.08283e-10	0.210235	0.361362	0.720908
ENSMUSG00000017057.10	MGI:105052	Il13ra1	interleukin 13 receptor, alpha 1	2.38448	2.57226e-14	9.76123e-13	0.796885	0.0121364	0.158819
ENSMUSG00000017144.9	MGI:1921444	Rnd3	Rho family GTPase 3	0.968287	7.33779e-09	7.94612e-08	0.576511	0.000795816	0.0326269
ENSMUSG00000017146.13	MGI:104537	Brca1	breast cancer 1, early onset	1.89865	2.83298e-11	5.52595e-10	0.245532	0.411921	0.753785
ENSMUSG00000017300.10	MGI:98780	Tnnc2	troponin C2, fast	4.23519	0.00254361	0.0074504	-1.14674	0.452362
ENSMUSG00000017386.11	MGI:1202880	Traf4	TNF receptor associated factor 4	0.955352	1.19604e-10	2.02062e-09	0.317197	0.0389994	0.281257
ENSMUSG00000017404.13	MGI:98020	Rpl19	ribosomal protein L19	0.651319	2.70635e-09	3.26475e-08	0.0298941	0.785441	0.934398
ENSMUSG00000017405.15	MGI:1890646	Nek8	NIMA (never in mitosis gene a)-related expressed kinase 8	0.962058	1.57042e-07	1.26138e-06	0.382824	0.0450816	0.29991
ENSMUSG00000017417.15	MGI:1919574	Plxdc1	plexin domain containing 1	1.98308	1.21171e-12	3.14367e-11	0.782292	0.00582459	0.105481
ENSMUSG00000017446.15	MGI:1919254	C1qtnf1	C1q and tumor necrosis factor related protein 1	3.20548	5.73247e-14	2.03365e-12	1.07146	0.0162741	0.184663
ENSMUSG00000017453.5	MGI:1197006	Pipox	pipecolic acid oxidase	1.45681	1.3251e-05	6.71205e-05	1.28211	0.000367036	0.0202782
ENSMUSG00000017466.10	MGI:98753	Timp2	tissue inhibitor of metalloproteinase 2	2.1712	1.95071e-07	1.53219e-06	1.142	0.00620454	0.109296
ENSMUSG00000017499.16	MGI:1345150	Cdc6	cell division cycle 6	2.1259	9.49357e-08	8.00996e-07	1.19941	0.00756291	0.121707
ENSMUSG00000017561.17	MGI:1860086	Crlf3	cytokine receptor-like factor 3	0.787781	2.29017e-09	2.81499e-08	0.133379	0.320167	0.688562
ENSMUSG00000017607.10	MGI:2144377	Tns4	tensin 4	3.90263	1.91698e-08	1.87954e-07	1.75706	0.0336843	0.264306
ENSMUSG00000017652.17	MGI:88336	Cd40	CD40 antigen	2.11967	2.79568e-06	1.65013e-05	0.686154	0.174	0.540982
ENSMUSG00000017697.4	MGI:87916	Ada	adenosine deaminase	2.00572	9.18975e-06	4.82039e-05	-0.031967	0.950345	0.987626
ENSMUSG00000017707.10	MGI:1349457	Serinc3	serine incorporator 3	1.00546	3.51449e-12	8.24086e-11	0.0425852	0.768578	0.927811
ENSMUSG00000017713.10	MGI:1919026	Tha1	threonine aldolase 1	0.963213	6.62634e-06	3.5856e-05	0.188134	0.396571	0.74253
ENSMUSG00000017716.16	MGI:1203517	Birc5	baculoviral IAP repeat-containing 5	3.27749	2.01509e-14	7.8452e-13	0.739287	0.0986466	0.42533
ENSMUSG00000017718.16	MGI:2448704	Afmid	arylformamidase	1.34242	1.32827e-05	6.72457e-05	0.609376	0.0507807	0.315445
ENSMUSG00000017721.16	MGI:1926178	Pigt	phosphatidylinositol glycan anchor biosynthesis, class T	0.690897	4.38017e-11	8.14621e-10	0.0951546	0.368147	0.724789
ENSMUSG00000017723.12	MGI:1914951	Wfdc2	WAP four-disulfide core domain 2	4.81569	0.00029505	0.00108609	-0.973873	0.434761
ENSMUSG00000017724.15	MGI:99423	Etv4	ets variant 4	0.794016	0.000113283	0.000458769	-0.0528495	0.802572	0.940508
ENSMUSG00000017734.16	MGI:106562	Dbndd2	dysbindin (dystrobrevin binding protein 1) domain containing 2	0.761483	3.3494e-08	3.1156e-07	-0.172264	0.213951	0.589983
ENSMUSG00000017747.14	MGI:1931556	Ghdc	GH3 domain containing	1.3544	8.78481e-09	9.39233e-08	0.370657	0.125856	0.469267
ENSMUSG00000017754.14	MGI:103151	Pltp	phospholipid transfer protein	0.845849	3.71057e-05	0.00016986	0.311476	0.130064	0.476545
ENSMUSG00000017756.10	MGI:1342283	Slc12a7	solute carrier family 12, member 7	1.84819	6.16174e-10	8.76434e-09	0.532766	0.0787814	0.386732
ENSMUSG00000017760.17	MGI:97748	Ctsa	cathepsin A	2.30639	3.64401e-16	2.32982e-14	0.33053	0.243501	0.621014
ENSMUSG00000017765.18	MGI:1309465	Slc12a4	solute carrier family 12, member 4	1.10411	4.27714e-12	9.82105e-11	0.036404	0.82243	0.947014
ENSMUSG00000017774.20	MGI:106612	Myo1c	myosin IC	1.24832	7.14074e-08	6.20121e-07	0.174619	0.456629	0.783794
ENSMUSG00000017830.16	MGI:1931560	Dhx58	DEXH (Asp-Glu-X-His) box polypeptide 58	3.80952	2.70828e-17	2.62925e-15	1.40194	0.00233453	0.0631393
ENSMUSG00000017837.13	MGI:1919216	Nkiras2	NFKB inhibitor interacting Ras-like protein 2	1.19836	5.79276e-11	1.05217e-09	0.14493	0.436951	0.771284
ENSMUSG00000017861.12	MGI:101785	Mybl2	myeloblastosis oncogene-like 2	1.36802	2.10062e-06	1.28126e-05	0.60741	0.055918	0.328945
ENSMUSG00000018008.9	MGI:2441702	Cyth4	cytohesin 4	2.31043	3.98148e-12	9.22312e-11	-0.00656451	0.984326	0.996503
ENSMUSG00000018042.19	MGI:94893	Cyb5r3	cytochrome b5 reductase 3	1.42715	8.52809e-17	6.89218e-15	0.355963	0.0388598	0.281038
ENSMUSG00000018102.6	MGI:1915274	H2bc4	H2B clustered histone 4	0.965287	1.03672e-06	6.83647e-06	0.290157	0.144762	0.497954
ENSMUSG00000018126.16	MGI:2652819	Baiap2l2	BAI1-associated protein 2-like 2	2.5892	2.03246e-07	1.58945e-06	0.76324	0.1464	0.500249
ENSMUSG00000018143.11	MGI:99951	Mafk	v-maf musculoaponeurotic fibrosarcoma oncogene family, protein K (avian)	1.06871	1.46329e-05	7.3499e-05	0.328477	0.190721	0.563437
ENSMUSG00000018166.9	MGI:95411	Erbb3	erb-b2 receptor tyrosine kinase 3	0.961351	0.000352934	0.00127662	0.478165	0.0789177	0.386979
ENSMUSG00000018167.11	MGI:1929618	Stard3	START domain containing 3	0.702136	5.39014e-10	7.77343e-09	0.114075	0.321186	0.689308
ENSMUSG00000018169.13	MGI:1095404	Mfng	MFNG O-fucosylpeptide 3-beta-N-acetylglucosaminyltransferase	2.22603	1.80667e-13	5.69954e-12	0.661147	0.0318024	0.258002
ENSMUSG00000018217.13	MGI:97631	Pmp22	peripheral myelin protein 22	2.06946	1.69441e-13	5.39268e-12	0.0539219	0.849236	0.956341
ENSMUSG00000018293.5	MGI:97549	Pfn1	profilin 1	0.606607	0.00011142	0.000451947	0.0381527	0.808724	0.943002
ENSMUSG00000018339.13	MGI:105102	Gpx3	glutathione peroxidase 3	4.35268	3.54951e-14	1.30927e-12	1.4001	0.0168056	0.188654
ENSMUSG00000018341.13	MGI:1270861	Il12rb2	interleukin 12 receptor, beta 2	2.4071	6.89562e-05	0.000294966	2.89646	0.0126368
ENSMUSG00000018362.15	MGI:103561	Kpna2	karyopherin (importin) alpha 2	1.14869	3.10432e-08	2.90527e-07	0.15482	0.462659	0.787873
ENSMUSG00000018377.11	MGI:1313291	Vezf1	vascular endothelial zinc finger 1	0.654408	8.29962e-07	5.59748e-06	0.157052	0.242733	0.620435
ENSMUSG00000018381.16	MGI:1913860	Abi3	ABI family member 3	3.15861	6.24893e-17	5.31917e-15	0.775281	0.0432842	0.294398
ENSMUSG00000018459.16	MGI:2149635	Slc13a3	solute carrier family 13 (sodium-dependent dicarboxylate transporter), member 3	1.44447	6.4065e-13	1.77745e-11	0.728821	0.000363004	0.0201803
ENSMUSG00000018500.3	MGI:99403	Adora2b	adenosine A2b receptor	1.21771	2.1459e-07	1.66549e-06	0.430884	0.0751273	0.378901
ENSMUSG00000018507.17	MGI:1341836	Trpv2	transient receptor potential cation channel, subfamily V, member 2	0.687699	0.000118341	0.000477061	0.200366	0.267851	0.644218
ENSMUSG00000018566.15	MGI:95758	Slc2a4	solute carrier family 2 (facilitated glucose transporter), member 4	1.60081	7.50192e-05	0.000318778	1.28089	0.00299465	0.0731423
ENSMUSG00000018567.15	MGI:1861742	Gabarap	gamma-aminobutyric acid receptor associated protein	0.725058	8.73489e-10	1.19275e-08	0.133674	0.260353	0.637326
ENSMUSG00000018574.15	MGI:895149	Acadvl	acyl-Coenzyme A dehydrogenase, very long chain	0.82106	2.16783e-14	8.40576e-13	0.1053	0.332997	0.699445
ENSMUSG00000018585.10	MGI:1333855	Atox1	antioxidant 1 copper chaperone	1.0673	4.14916e-09	4.81159e-08	0.215447	0.240915	0.618887
ENSMUSG00000018593.14	MGI:98373	Sparc	secreted acidic cysteine rich glycoprotein	2.64961	3.80875e-14	1.39239e-12	1.02344	0.00347723	0.0798795
ENSMUSG00000018654.18	MGI:1342540	Ikzf1	IKAROS family zinc finger 1	3.04555	3.15899e-17	2.94133e-15	0.793632	0.0305626	0.251901
ENSMUSG00000018672.16	MGI:1929008	Copz2	coatomer protein complex, subunit zeta 2	1.33229	8.19982e-08	7.00674e-07	0.287569	0.255809	0.632885
ENSMUSG00000018677.10	MGI:1196386	Slc25a39	solute carrier family 25, member 39	0.816406	4.28503e-09	4.95517e-08	0.239021	0.0875397	0.403848
ENSMUSG00000018727.20	MGI:1277182	Cpsf4l	cleavage and polyadenylation specific factor 4-like	4.05748	0.0015938	0.00491904	1.84155	0.220212
ENSMUSG00000018752.20	MGI:3845075	Tnfsfm13	tumor necrosis factor (ligand) superfamily, membrane-bound member 13	1.28706	8.41257e-07	5.66701e-06	0.141611	0.595435	0.862054
ENSMUSG00000018774.14	MGI:88342	Cd68	CD68 antigen	4.52511	5.09331e-23	5.34662e-20	1.3546	0.00333815	0.0778586
ENSMUSG00000018819.11	MGI:96832	Lsp1	lymphocyte specific 1	3.29992	1.00751e-11	2.1568e-10	1.12713	0.023736	0.221843
ENSMUSG00000018822.8	MGI:1860298	Sfrp5	secreted frizzled-related sequence protein 5	7.92878	4.00306e-08	3.65974e-07	3.0588	0.0327791	0.261538
ENSMUSG00000018845.15	MGI:2443377	Unc45b	unc-45 myosin chaperone B	2.8887	5.61048e-12	1.26306e-10	0.531395	0.219991	0.596629
ENSMUSG00000018899.18	MGI:96590	Irf1	interferon regulatory factor 1	1.62404	9.19288e-15	3.92999e-13	0.265557	0.214556	0.590876
ENSMUSG00000018920.12	MGI:1932682	Cxcl16	chemokine (C-X-C motif) ligand 16	4.42163	1.56335e-19	3.57252e-17	1.85601	0.000242194	0.0151001
ENSMUSG00000018923.14	MGI:1913422	Med11	mediator complex subunit 11	0.762652	1.23192e-06	7.96483e-06	0.310876	0.055899	0.328945
ENSMUSG00000018924.7	MGI:87997	Alox15	arachidonate 15-lipoxygenase	3.74188	0.00145039	0.0045289	-0.18343	0.903199
ENSMUSG00000018927.4	MGI:98263	Ccl6	chemokine (C-C motif) ligand 6	3.04209	4.8377e-13	1.38493e-11	0.987211	0.0231237	0.218903
ENSMUSG00000018930.4	MGI:98261	Ccl4	chemokine (C-C motif) ligand 4	4.36087	3.20955e-10	4.9249e-09	1.81358	0.0305026	0.251819
ENSMUSG00000018931.4	MGI:1344388	Natd1	N-acetyltransferase domain containing 1	1.14746	3.2222e-11	6.20936e-10	0.212062	0.227932	0.605202
ENSMUSG00000018932.10	MGI:1346868	Map2k3	mitogen-activated protein kinase kinase 3	1.19225	1.66717e-10	2.73311e-09	0.38326	0.0430653	0.294161
ENSMUSG00000018983.10	MGI:1096341	E2f2	E2F transcription factor 2	1.90412	2.54014e-12	6.1709e-11	-0.159207	0.584934	0.857136
ENSMUSG00000018986.11	MGI:1329005	Slfn3	schlafen 3	2.35698	4.7646e-09	5.44538e-08	0.441175	0.335733	0.70129
ENSMUSG00000019055.16	MGI:99907	Plod1	procollagen-lysine, 2-oxoglutarate 5-dioxygenase 1	2.20958	1.22308e-16	9.30935e-15	0.374753	0.163332	0.526128
ENSMUSG00000019088.15	MGI:109628	Dnase1l1	deoxyribonuclease 1-like 1	2.5287	1.92687e-10	3.11099e-09	0.636889	0.128577	0.473668
ENSMUSG00000019122.9	MGI:104533	Ccl9	chemokine (C-C motif) ligand 9	2.4003	3.90258e-11	7.37237e-10	1.2511	0.00074233	0.0312127
ENSMUSG00000019173.12	MGI:105306	Rab5c	RAB5C, member RAS oncogene family	0.658422	4.59011e-12	1.05061e-10	0.0901368	0.346269	0.710766
ENSMUSG00000019178.18	MGI:1923821	Styxl1	serine/threonine/tyrosine interacting-like 1	3.08956	0.000384174	0.00137716	1.37809	0.0903569
ENSMUSG00000019214.15	MGI:2384887	Chtf18	CTF18, chromosome transmission fidelity factor 18	1.36516	1.02435e-06	6.7642e-06	0.612801	0.0529666	0.323228
ENSMUSG00000019297.10	MGI:1915092	Nop9	NOP9 nucleolar protein	0.99723	4.95984e-10	7.23995e-09	0.226927	0.167735	0.53267
ENSMUSG00000019301.6	MGI:105077	Hsd17b1	hydroxysteroid (17-beta) dehydrogenase 1	1.63946	0.00179487	0.00547153	0.548681	0.289147	0.663733
ENSMUSG00000019320.15	MGI:1919143	Noxo1	NADPH oxidase organizer 1	0.731301	0.00293557	0.0084688	0.579397	0.0272602	0.23849
ENSMUSG00000019359.15	MGI:1918834	Gdpd2	glycerophosphodiester phosphodiesterase domain containing 2	1.39628	5.54074e-09	6.22706e-08	0.819706	0.000714716	0.030767
ENSMUSG00000019461.13	MGI:1917560	Plscr3	phospholipid scramblase 3	0.902917	3.14344e-10	4.83377e-09	0.337973	0.0210667	0.209922
ENSMUSG00000019464.7	MGI:97793	Ptger1	prostaglandin E receptor 1 (subtype EP1)	1.05997	0.00123936	0.00394051	0.838932	0.0200405	0.206036
ENSMUSG00000019487.12	MGI:2146901	Trip10	thyroid hormone receptor interactor 10	1.49263	3.68598e-08	3.40448e-07	0.00725185	0.979109	0.994559
ENSMUSG00000019489.8	MGI:1195273	Cd70	CD70 antigen	4.27084	0.000167679	0.000652637	1.61707	0.146073
ENSMUSG00000019528.19	MGI:1351614	Gyg	glycogenin	0.766224	0.000262244	0.000976956	-0.00802377	0.969669	0.99235
ENSMUSG00000019539.12	MGI:1277122	Rcn3	reticulocalbin 3, EF-hand calcium binding domain	2.02075	4.17272e-11	7.79061e-10	0.707629	0.0222474	0.214543
ENSMUSG00000019577.7	MGI:1351481	Pdk4	pyruvate dehydrogenase kinase, isoenzyme 4	0.902033	1.8023e-07	1.42652e-06	0.227499	0.193712	0.566301
ENSMUSG00000019579.14	MGI:2156020	Mydgf	myeloid derived growth factor	0.766051	9.55378e-09	1.0087e-07	0.173251	0.200071	0.573345
ENSMUSG00000019732.15	MGI:1920566	Calr3	calreticulin 3	1.32823	0.000169488	0.000658698	0.439863	0.223962	0.600774
ENSMUSG00000019773.8	MGI:1914391	Fbxo5	F-box protein 5	1.51871	1.14658e-06	7.47357e-06	0.533892	0.107973	0.440212
ENSMUSG00000019789.10	MGI:1341884	Hey2	hairy/enhancer-of-split related with YRPW motif 2	1.30303	1.96308e-05	9.56634e-05	0.113828	0.716681	0.912181
ENSMUSG00000019803.12	MGI:1100526	Nr2e1	nuclear receptor subfamily 2, group E, member 1	0.773603	1.99273e-10	3.20474e-09	0.159381	0.198515	0.571984
ENSMUSG00000019810.16	MGI:1914098	Fuca2	fucosidase, alpha-L- 2, plasma	1.07229	1.99672e-10	3.20936e-09	0.0213609	0.89997	0.973573
ENSMUSG00000019818.16	MGI:1859568	Cd164	CD164 antigen	1.00948	1.41751e-13	4.57212e-12	0.102007	0.457743	0.784274
ENSMUSG00000019820.12	MGI:104631	Utrn	utrophin	0.73833	0.000300727	0.00110501	0.130832	0.522581	0.822166
ENSMUSG00000019823.18	MGI:2385847	Mical1	microtubule associated monooxygenase, calponin and LIM domain containing 1	1.55244	6.26799e-11	1.13064e-09	0.287107	0.232431	0.610023
ENSMUSG00000019832.6	MGI:1915094	Rab32	RAB32, member RAS oncogene family	3.3505	9.29422e-22	5.57092e-19	0.621005	0.0802681	0.389795
ENSMUSG00000019838.12	MGI:1919722	Slc16a10	solute carrier family 16 (monocarboxylic acid transporters), member 10	0.981389	0.00030508	0.00111972	-0.637087	0.0212472	0.21087
ENSMUSG00000019842.7	MGI:2143599	Traf3ip2	TRAF3 interacting protein 2	2.6052	5.07994e-07	3.60077e-06	0.98969	0.0598017	0.339009
ENSMUSG00000019846.12	MGI:109321	Lama4	laminin, alpha 4	1.70134	1.64082e-09	2.09248e-08	0.48595	0.0895453	0.407639
ENSMUSG00000019850.12	MGI:1196377	Tnfaip3	tumor necrosis factor, alpha-induced protein 3	1.24181	1.74121e-05	8.58258e-05	0.219908	0.453887	0.782198
ENSMUSG00000019853.7	MGI:1860084	Hebp2	heme binding protein 2	1.57465	1.85502e-05	9.09368e-05	0.0576771	0.877066	0.965468
ENSMUSG00000019866.16	MGI:109544	Crybg1	crystallin beta-gamma domain containing 1	2.45356	8.00045e-08	6.86902e-07	0.250542	0.593845	0.861379
ENSMUSG00000019872.14	MGI:1931437	Smpdl3a	sphingomyelin phosphodiesterase, acid-like 3A	0.924802	2.17673e-07	1.68623e-06	-0.142368	0.429326	0.766682
ENSMUSG00000019873.9	MGI:88930	Reep3	receptor accessory protein 3	1.34287	1.64941e-15	8.77176e-14	0.217233	0.200984	0.574469
ENSMUSG00000019874.12	MGI:101916	Fabp7	fatty acid binding protein 7, brain	3.19766	3.28796e-13	9.72229e-12	-0.0843645	0.84805	0.95585
ENSMUSG00000019899.18	MGI:99912	Lama2	laminin, alpha 2	0.795473	3.18618e-08	2.97822e-07	0.258814	0.0752948	0.379056
ENSMUSG00000019916.15	MGI:97463	P4ha1	procollagen-proline, 2-oxoglutarate 4-dioxygenase (proline 4-hydroxylase), alpha 1 polypeptide	0.669074	3.73992e-06	2.13579e-05	-0.0417736	0.774124	0.930131
ENSMUSG00000019917.11	MGI:1918110	Septin10	septin 10	1.56032	3.66761e-10	5.54454e-09	0.243639	0.338627	0.70407
ENSMUSG00000019920.19	MGI:1195263	Lims1	LIM and senescent cell antigen-like domains 1	1.35413	5.32742e-13	1.50861e-11	0.196055	0.30029	0.673128
ENSMUSG00000019929.17	MGI:94872	Dcn	decorin	2.12652	0.002067	0.0062012	2.44402	0.000401652	0.0216693
ENSMUSG00000019942.14	MGI:88351	Cdk1	cyclin-dependent kinase 1	4.35298	1.90246e-16	1.34486e-14	1.86812	0.000959069	0.036835
ENSMUSG00000019944.15	MGI:1916538	Rhobtb1	Rho-related BTB domain containing 1	0.7898	2.55044e-05	0.000120828	0.311597	0.109118	0.441147
ENSMUSG00000019947.11	MGI:2175912	Arid5b	AT rich interactive domain 5B (MRF1-like)	0.877422	5.77669e-05	0.000251718	0.101199	0.644002	0.883091
ENSMUSG00000019952.16	MGI:1918511	Poc1b	POC1 centriolar protein B	1.01857	6.96183e-10	9.79456e-09	0.0972917	0.567136	0.845827
ENSMUSG00000019960.9	MGI:1914853	Dusp6	dual specificity phosphatase 6	1.49935	8.04112e-05	0.000338976	-0.0844876	0.824566	0.947527
ENSMUSG00000019961.18	MGI:106920	Tmpo	thymopoietin	0.861627	1.57679e-08	1.58179e-07	0.314263	0.0408495	0.286321
ENSMUSG00000019970.16	MGI:1340062	Sgk1	serum/glucocorticoid regulated kinase 1	0.902772	3.75395e-06	2.14338e-05	-0.0145288	0.940874	0.985167
ENSMUSG00000019975.13	MGI:1914704	Ikbip	IKBKB interacting protein	0.837031	1.28061e-08	1.31165e-07	0.157816	0.297027	0.670481
ENSMUSG00000019978.17	MGI:103009	Epb41l2	erythrocyte membrane protein band 4.1 like 2	1.76412	2.03099e-15	1.03946e-13	0.401186	0.0716673	0.370118
ENSMUSG00000019988.8	MGI:97293	Nedd1	neural precursor cell expressed, developmentally down-regulated gene 1	1.59522	4.34393e-11	8.08926e-10	0.309141	0.221346	0.598162
ENSMUSG00000019992.9	MGI:1919054	Mtfr2	mitochondrial fission regulator 2	1.54467	0.000351198	0.00127114	-0.135707	0.77017	0.928778
ENSMUSG00000019997.12	MGI:95537	Ccn2	cellular communication network factor 2	4.22736	5.15019e-11	9.48024e-10	0.521927	0.423057	0.761619
ENSMUSG00000020009.14	MGI:107655	Ifngr1	interferon gamma receptor 1	2.10707	4.59768e-15	2.13011e-13	0.535286	0.0486141	0.309746
ENSMUSG00000020010.8	MGI:1347055	Vnn3	vanin 3	4.13397	0.00164148	0.00505371	1.61666	0.238671
ENSMUSG00000020019.5	MGI:1888978	Ntn4	netrin 4	1.48349	3.11422e-09	3.71011e-08	0.400365	0.117259	0.454498
ENSMUSG00000020037.16	MGI:1918387	Rfx4	regulatory factor X, 4 (influences HLA class II expression)	0.686986	5.89802e-09	6.58742e-08	0.34653	0.00450496	0.0909875
ENSMUSG00000020044.14	MGI:98754	Timp3	tissue inhibitor of metalloproteinase 3	1.6821	1.07756e-11	2.29647e-10	0.185253	0.454862	0.782713
ENSMUSG00000020048.14	MGI:98817	Hsp90b1	heat shock protein 90, beta (Grp94), member 1	0.618031	0.000779658	0.00260454	-0.0290244	0.874691	0.964808
ENSMUSG00000020052.10	MGI:96919	Ascl1	achaete-scute family bHLH transcription factor 1	1.16756	7.30653e-06	3.92048e-05	0.503931	0.0570474	0.332259
ENSMUSG00000020053.19	MGI:96432	Igf1	insulin-like growth factor 1	2.81082	6.69427e-10	9.46906e-09	0.318189	0.487787	0.803816
ENSMUSG00000020067.9	MGI:1916052	Mypn	myopalladin	1.64273	0.00290037	0.00837986	-0.157108	0.802722	0.940508
ENSMUSG00000020075.9	MGI:1860494	Ddx21	DExD box helicase 21	0.738166	8.44929e-08	7.19215e-07	-0.126774	0.362496	0.721187
ENSMUSG00000020077.15	MGI:97756	Srgn	serglycin	2.27587	1.24121e-11	2.60853e-10	0.291161	0.394211	0.740551
ENSMUSG00000020080.9	MGI:2384910	Hkdc1	hexokinase domain containing 1	1.67178	3.97728e-05	0.00018066	0.308385	0.454054	0.782198
ENSMUSG00000020085.16	MGI:1918611	Aifm2	apoptosis-inducing factor, mitochondrion-associated 2	0.97957	1.51877e-07	1.2233e-06	0.170812	0.370485	0.725693
ENSMUSG00000020092.10	MGI:1351623	Pald1	phosphatase domain containing, paladin 1	1.38221	1.80847e-08	1.78802e-07	-0.0322675	0.896341	0.972566
ENSMUSG00000020097.15	MGI:1261415	Sgpl1	sphingosine phosphate lyase 1	1.93897	2.23451e-16	1.54913e-14	0.377533	0.111475	0.444114
ENSMUSG00000020100.16	MGI:1918529	Slc29a3	solute carrier family 29 (nucleoside transporters), member 3	1.91489	5.40996e-16	3.2907e-14	0.762516	0.00138239	0.0464606
ENSMUSG00000020101.15	MGI:1921298	Vsir	V-set immunoregulatory receptor	2.53077	8.78696e-16	4.95705e-14	0.753799	0.0169921	0.189311
ENSMUSG00000020105.10	MGI:2443955	Lrig3	leucine-rich repeats and immunoglobulin-like domains 3	0.882312	0.00186796	0.00567022	0.487624	0.100461	0.428523
ENSMUSG00000020120.16	MGI:1860485	Plek	pleckstrin	3.46214	5.49585e-20	1.50591e-17	0.867113	0.0224676	0.215619
ENSMUSG00000020122.17	MGI:95294	Egfr	epidermal growth factor receptor	0.900696	8.52836e-11	1.4907e-09	0.501792	0.000338491	0.0192679
ENSMUSG00000020142.13	MGI:2135601	Slc1a4	solute carrier family 1 (glutamate/neutral amino acid transporter), member 4	1.02266	2.46397e-13	7.54963e-12	0.202063	0.149732	0.506529
ENSMUSG00000020143.16	MGI:2149010	Dock2	dedicator of cyto-kinesis 2	3.44531	3.33411e-20	9.8313e-18	1.25511	0.000938427	0.0362443
ENSMUSG00000020150.14	MGI:1098221	Gamt	guanidinoacetate methyltransferase	0.685673	0.000348294	0.00126206	0.684525	0.000421703	0.0221159
ENSMUSG00000020185.17	MGI:1289147	E2f7	E2F transcription factor 7	2.42735	1.34514e-07	1.10009e-06	0.766101	0.183331	0.553584
ENSMUSG00000020205.9	MGI:1096880	Phlda1	pleckstrin homology like domain, family A, member 1	0.993264	2.4319e-05	0.000115899	0.224744	0.348362	0.7122
ENSMUSG00000020216.14	MGI:1916700	Jsrp1	junctional sarcoplasmic reticulum protein 1	1.42825	0.000275752	0.00102172	-0.228234	0.569796	0.847345
ENSMUSG00000020227.11	MGI:1921164	Irak3	interleukin-1 receptor-associated kinase 3	1.90267	2.00215e-06	1.22718e-05	0.578961	0.178979	0.548783
ENSMUSG00000020228.12	MGI:2152895	Helb	helicase (DNA) B	0.958568	3.3517e-06	1.93561e-05	0.211524	0.319141	0.687744
ENSMUSG00000020232.18	MGI:1341190	Hmg20b	high mobility group 20B	0.770115	1.9637e-07	1.54155e-06	0.391053	0.00994748	0.142113
ENSMUSG00000020241.14	MGI:88460	Col6a2	collagen, type VI, alpha 2	2.96104	5.79875e-07	4.04647e-06	2.20622	0.000221709	0.0144062
ENSMUSG00000020253.16	MGI:1915155	Ppm1m	protein phosphatase 1M	0.853604	1.43458e-06	9.12338e-06	0.47306	0.00843079	0.130478
ENSMUSG00000020256.15	MGI:2444680	Aldh1l2	aldehyde dehydrogenase 1 family, member L2	3.08637	7.62017e-21	2.84727e-18	0.75095	0.0246923	0.225658
ENSMUSG00000020260.10	MGI:1916863	Pofut2	protein O-fucosyltransferase 2	0.892339	4.94297e-10	7.219e-09	0.241204	0.0965911	0.421554
ENSMUSG00000020272.9	MGI:1099439	Stk10	serine/threonine kinase 10	1.90456	4.47814e-15	2.08143e-13	0.255056	0.300518	0.673173
ENSMUSG00000020275.10	MGI:97897	Rel	reticuloendotheliosis oncogene	1.53471	9.57315e-13	2.56452e-11	0.498169	0.0251984	0.228189
ENSMUSG00000020282.19	MGI:104328	Rhbdf1	rhomboid 5 homolog 1	2.52749	7.04616e-12	1.55583e-10	0.340425	0.358282	0.719293
ENSMUSG00000020303.3	MGI:1316731	Stc2	stanniocalcin 2	1.44282	4.43027e-05	0.000198634	-0.624604	0.0830909	0.39551
ENSMUSG00000020310.10	MGI:103579	Madcam1	mucosal vascular addressin cell adhesion molecule 1	4.02881	0.00221303	0.00658508	0.241889	0.857133
ENSMUSG00000020328.11	MGI:1277103	Nudcd2	NudC domain containing 2	0.734054	6.65994e-09	7.31627e-08	0.0307455	0.814344	0.944423
ENSMUSG00000020330.17	MGI:104667	Hmmr	hyaluronan mediated motility receptor (RHAMM)	3.5679	1.07068e-12	2.83222e-11	1.35286	0.0116652	0.155104
ENSMUSG00000020334.7	MGI:1353479	Slc22a4	solute carrier family 22 (organic cation transporter), member 4	1.46382	1.32313e-10	2.2081e-09	0.717461	0.00188552	0.0562202
ENSMUSG00000020346.17	MGI:96973	Mgat1	mannoside acetylglucosaminyltransferase 1	0.596336	4.81227e-07	3.43329e-06	0.129615	0.278259	0.653917
ENSMUSG00000020357.4	MGI:95561	Flt4	FMS-like tyrosine kinase 4	0.741277	0.000527928	0.00183376	0.0553484	0.801459	0.940508
ENSMUSG00000020363.7	MGI:1338883	Gfpt2	glutamine fructose-6-phosphate transaminase 2	2.26801	2.46772e-13	7.55307e-12	0.600352	0.0565394	0.330768
ENSMUSG00000020372.16	MGI:101849	Rack1	receptor for activated C kinase 1	0.889947	1.80155e-11	3.65531e-10	-0.00315105	0.981054	0.995656
ENSMUSG00000020377.16	MGI:107498	Ltc4s	leukotriene C4 synthase	3.10829	1.20009e-14	4.97773e-13	1.16624	0.00551392	0.102551
ENSMUSG00000020393.17	MGI:1933988	Kremen1	kringle containing transmembrane protein 1	0.830335	2.75182e-13	8.33396e-12	0.205005	0.0765374	0.381634
ENSMUSG00000020399.15	MGI:2159682	Havcr2	hepatitis A virus cellular receptor 2	3.4217	1.70992e-18	2.58926e-16	1.13284	0.00430984	0.0887879
ENSMUSG00000020407.14	MGI:1097668	Upp1	uridine phosphorylase 1	1.05771	0.000529563	0.00183877	-0.304904	0.336876	0.702408
ENSMUSG00000020413.12	MGI:1277962	Hus1	HUS1 checkpoint clamp component	0.677968	4.01998e-08	3.67405e-07	0.13717	0.275605	0.651533
ENSMUSG00000020422.15	MGI:2443012	Tns3	tensin 3	1.57946	6.68003e-12	1.47953e-10	0.386599	0.0936203	0.415644
ENSMUSG00000020423.7	MGI:108384	Btg2	BTG anti-proliferation factor 2	1.23031	3.16339e-06	1.83755e-05	-0.480726	0.0702514	0.367092
ENSMUSG00000020424.4	MGI:1919212	Castor1	cytosolic arginine sensor for mTORC1 subunit 1	1.75575	6.95889e-09	7.60115e-08	0.332209	0.291088	0.664976
ENSMUSG00000020427.12	MGI:96438	Igfbp3	insulin-like growth factor binding protein 3	2.38657	1.45574e-06	9.2437e-06	0.332549	0.503628	0.812445
ENSMUSG00000020432.13	MGI:98534	Tcn2	transcobalamin 2	2.92893	1.01148e-18	1.67425e-16	0.656369	0.0488742	0.310428
ENSMUSG00000020434.5	MGI:1914680	4921536K21Rik	RIKEN cDNA 4921536K21 gene	1.13508	0.00113926	0.00365414	0.599906	0.175442	0.543664
ENSMUSG00000020437.13	MGI:1927091	Myo1g	myosin IG	4.07017	9.08832e-14	3.05467e-12	1.50913	0.0090368	0.134821
ENSMUSG00000020439.18	MGI:1354727	Smtn	smoothelin	1.10931	8.39553e-06	4.44022e-05	0.368745	0.145816	0.49975
ENSMUSG00000020467.16	MGI:1339998	Efemp1	epidermal growth factor-containing fibulin-like extracellular matrix protein 1	1.29308	7.20773e-08	6.24996e-07	0.56878	0.0193347	0.202695
ENSMUSG00000020472.15	MGI:2679270	Zkscan17	zinc finger with KRAB and SCAN domains 17	1.07538	1.08271e-09	1.4482e-08	0.00964816	0.957101	0.989238
ENSMUSG00000020473.14	MGI:1197012	Aebp1	AE binding protein 1	2.3276	2.03141e-10	3.26149e-09	1.06877	0.00444241	0.0900347
ENSMUSG00000020493.9	MGI:2444496	Prr11	proline rich 11	3.36227	5.62355e-15	2.55197e-13	1.09805	0.0164891	0.186587
ENSMUSG00000020520.15	MGI:1890480	Galnt10	polypeptide N-acetylgalactosaminyltransferase 10	1.957	3.43411e-15	1.66055e-13	0.0718573	0.775862	0.930773
ENSMUSG00000020538.16	MGI:107606	Srebf1	sterol regulatory element binding transcription factor 1	1.2876	3.17074e-18	4.16289e-16	0.524256	0.000444913	0.0228688
ENSMUSG00000020553.9	MGI:107375	Pctp	phosphatidylcholine transfer protein	2.58463	2.00768e-12	4.98817e-11	0.552464	0.147812	0.503004
ENSMUSG00000020571.14	MGI:1919103	Pdia6	protein disulfide isomerase associated 6	0.829857	0.000488106	0.00171176	-0.0888783	0.70913	0.908698
ENSMUSG00000020573.18	MGI:1353576	Pik3cg	phosphatidylinositol-4,5-bisphosphate 3-kinase catalytic subunit gamma	3.06381	9.78611e-18	1.09555e-15	0.602877	0.0966006	0.421554
ENSMUSG00000020592.15	MGI:1349162	Sdc1	syndecan 1	2.66011	4.28245e-06	2.41969e-05	0.734668	0.217994	0.594743
ENSMUSG00000020604.14	MGI:1921258	Arsg	arylsulfatase G	0.943676	2.17074e-05	0.000104702	0.398215	0.0765201	0.381634
ENSMUSG00000020605.10	MGI:1913224	Hs1bp3	HCLS1 binding protein 3	0.810663	2.34129e-12	5.72988e-11	0.186203	0.116286	0.452577
ENSMUSG00000020609.15	MGI:88052	Apob	apolipoprotein B	4.5403	4.835e-05	0.000214805	0.946455	0.372778	0.727425
ENSMUSG00000020611.15	MGI:95768	Gna13	guanine nucleotide binding protein, alpha 13	1.07006	2.50264e-19	5.21763e-17	0.408831	0.000645327	0.0288949
ENSMUSG00000020638.9	MGI:99830	Cmpk2	cytidine monophosphate (UMP-CMP) kinase 2, mitochondrial	0.857207	3.01457e-08	2.82699e-07	0.342923	0.028231	0.243159
ENSMUSG00000020641.17	MGI:1929628	Rsad2	radical S-adenosyl methionine domain containing 2	3.8124	2.15514e-13	6.66725e-12	1.2053	0.0234165	0.220135
ENSMUSG00000020642.14	MGI:1344401	Rnf144a	ring finger protein 144A	0.946981	3.44759e-19	6.74766e-17	0.158217	0.142863	0.496217
ENSMUSG00000020644.10	MGI:96397	Id2	inhibitor of DNA binding 2	0.586508	0.000206454	0.000786323	0.0558495	0.724872	0.914908
ENSMUSG00000020649.12	MGI:98181	Rrm2	ribonucleotide reductase M2	3.32718	1.34901e-15	7.35388e-14	1.13729	0.00812122	0.127611
ENSMUSG00000020652.18	MGI:1923800	Cenpo	centromere protein O	0.862398	3.48708e-06	2.00734e-05	0.222505	0.257358	0.634442
ENSMUSG00000020653.13	MGI:2653368	Klf11	Kruppel-like factor 11	0.784695	0.00142824	0.00446845	0.0569003	0.818633	0.945613
ENSMUSG00000020660.7	MGI:97742	Pomc	pro-opiomelanocortin-alpha	1.24767	0.000105927	0.000432351	0.678914	0.0387426	0.280792
ENSMUSG00000020681.15	MGI:87874	Ace	angiotensin I converting enzyme (peptidyl-dipeptidase A) 1	1.51872	7.61942e-08	6.57716e-07	0.692732	0.0161257	0.183799
ENSMUSG00000020682.18	MGI:2153062	Mmp28	matrix metallopeptidase 28 (epilysin)	1.03848	8.64518e-06	4.56052e-05	0.230444	0.351703	0.714256
ENSMUSG00000020689.5	MGI:96612	Itgb3	integrin beta 3	2.50981	1.91501e-11	3.85831e-10	0.0748934	0.84517	0.955176
ENSMUSG00000020695.15	MGI:107818	Mrc2	mannose receptor, C type 2	2.97152	1.8469e-16	1.31203e-14	0.6661	0.0696056	0.365041
ENSMUSG00000020696.19	MGI:1914588	Rffl	ring finger and FYVE like domain containing protein	1.19666	2.41826e-08	2.31534e-07	0.356651	0.102549	0.43094
ENSMUSG00000020707.7	MGI:1919206	Rnf135	ring finger protein 135	1.71571	2.73455e-13	8.29037e-12	0.544816	0.0266083	0.234846
ENSMUSG00000020709.16	MGI:2663075	Adap2	ArfGAP with dual PH domains 2	2.59155	1.33058e-15	7.28356e-14	1.00286	0.0023493	0.0633727
ENSMUSG00000020717.20	MGI:97537	Pecam1	platelet/endothelial cell adhesion molecule 1	0.826166	8.03805e-05	0.000338896	0.1043	0.620603	0.872755
ENSMUSG00000020723.4	MGI:1859167	Cacng4	calcium channel, voltage-dependent, gamma subunit 4	0.73762	2.31851e-07	1.78693e-06	-0.0793282	0.584456	0.856801
ENSMUSG00000020733.4	MGI:1349482	Slc9a3r1	solute carrier family 9 (sodium/hydrogen exchanger), member 3 regulator 1	1.11829	1.16753e-14	4.87535e-13	0.066147	0.651485	0.886159
ENSMUSG00000020743.16	MGI:1916924	Mif4gd	MIF4G domain containing	1.15207	1.87796e-09	2.35943e-08	0.251594	0.19894	0.57244
ENSMUSG00000020766.5	MGI:95730	Galk1	galactokinase 1	0.923057	4.38894e-05	0.000197026	0.408113	0.0753343	0.379056
ENSMUSG00000020773.12	MGI:1917374	Trim47	tripartite motif-containing 47	2.33398	4.2312e-11	7.88956e-10	0.876487	0.0173408	0.191714
ENSMUSG00000020782.19	MGI:1918843	Llgl2	LLGL2 scribble cell polarity complex component	1.12396	0.000963855	0.00314768	0.675033	0.0543492	0.325568
ENSMUSG00000020787.15	MGI:1098235	P2rx1	purinergic receptor P2X, ligand-gated ion channel, 1	1.98493	5.45508e-06	3.00552e-05	1.08777	0.0288481	0.245827
ENSMUSG00000020798.15	MGI:1924827	Spns3	spinster homolog 3	2.10311	3.50283e-06	2.01479e-05	0.472456	0.33813	0.703817
ENSMUSG00000020803.4	MGI:1289248	Txndc17	thioredoxin domain containing 17	0.68859	4.28139e-07	3.09731e-06	0.0789611	0.567183	0.845827
ENSMUSG00000020806.16	MGI:2442473	Rhbdf2	rhomboid 5 homolog 2	2.72468	6.17054e-13	1.71861e-11	0.463847	0.243127	0.620678
ENSMUSG00000020808.4	MGI:1924434	Pimreg	PICALM interacting mitotic regulator	4.07747	2.71236e-14	1.02277e-12	1.53707	0.00651218	0.112134
ENSMUSG00000020814.14	MGI:1914872	Mxra7	matrix-remodelling associated 7	0.803319	2.78266e-06	1.64327e-05	0.261932	0.135597	0.485632
ENSMUSG00000020826.10	MGI:97361	Nos2	nitric oxide synthase 2, inducible	1.70056	1.1387e-05	5.8534e-05	0.159626	0.689744	0.902125
ENSMUSG00000020828.14	MGI:892877	Pld2	phospholipase D2	0.87174	2.63302e-13	8.01635e-12	0.319795	0.00846501	0.130727
ENSMUSG00000020829.10	MGI:1098733	Slc46a1	solute carrier family 46, member 1	1.10753	3.92301e-10	5.89777e-09	0.313753	0.0854398	0.399422
ENSMUSG00000020834.18	MGI:1917701	Dhrs13	dehydrogenase/reductase (SDR family) member 13	0.918634	4.369e-06	2.46423e-05	0.17511	0.378463	0.730969
ENSMUSG00000020841.6	MGI:107265	Cpd	carboxypeptidase D	0.754162	3.77245e-12	8.76715e-11	0.0346925	0.750166	0.922055
ENSMUSG00000020844.7	MGI:109331	Nxn	nucleoredoxin	1.4	3.26792e-09	3.87717e-08	0.455057	0.0578328	0.333892
ENSMUSG00000020857.12	MGI:97356	Nme2	NME/NM23 nucleoside diphosphate kinase 2	0.662414	4.10721e-08	3.74188e-07	0.0610554	0.615885	0.87087
ENSMUSG00000020865.17	MGI:1923658	Abcc3	ATP-binding cassette, sub-family C (CFTR/MRP), member 3	3.44544	1.01045e-14	4.28155e-13	0.918825	0.0436374	0.295049
ENSMUSG00000020897.13	MGI:107168	Aurkb	aurora kinase B	3.74644	7.57535e-13	2.06784e-11	1.35826	0.0149066	0.177633
ENSMUSG00000020901.14	MGI:2443588	Pik3r5	phosphoinositide-3-kinase regulatory subunit 5	2.99003	2.42804e-13	7.46311e-12	0.73245	0.0812744	0.392297
ENSMUSG00000020902.13	MGI:105088	Ntn1	netrin 1	0.955404	2.45951e-05	0.000116986	0.245242	0.2878	0.662672
ENSMUSG00000020907.2	MGI:97883	Rcvrn	recoverin	1.63114	0.00153165	0.00474862	0.648566	0.243189	0.620678
ENSMUSG00000020914.18	MGI:98790	Top2a	topoisomerase (DNA) II alpha	4.26199	3.62483e-23	4.34542e-20	1.53226	0.000426519	0.0222059
ENSMUSG00000020919.12	MGI:103035	Stat5b	signal transducer and activator of transcription 5B	1.08404	2.85732e-11	5.56588e-10	0.300532	0.0720927	0.371021
ENSMUSG00000020941.8	MGI:1858204	Map3k14	mitogen-activated protein kinase kinase kinase 14	1.71281	1.45079e-15	7.78743e-14	0.460336	0.0400665	0.284177
ENSMUSG00000020963.16	MGI:98849	Tshr	thyroid stimulating hormone receptor	2.678	2.26158e-06	1.36611e-05	0.365945	0.544735	0.833525
ENSMUSG00000020974.7	MGI:1197514	Pole2	polymerase (DNA directed), epsilon 2 (p59 subunit)	2.00193	8.65959e-07	5.81571e-06	0.219183	0.609899	0.86775
ENSMUSG00000021010.10	MGI:1351610	Npas3	neuronal PAS domain protein 3	1.38207	2.69668e-11	5.27797e-10	0.543362	0.00983061	0.141776
ENSMUSG00000021025.9	MGI:104741	Nfkbia	nuclear factor of kappa light polypeptide gene enhancer in B cells inhibitor, alpha	1.29028	3.33969e-09	3.95579e-08	0.36258	0.100306	0.428523
ENSMUSG00000021036.11	MGI:108074	Sptlc2	serine palmitoyltransferase, long chain base subunit 2	0.673604	3.34958e-06	1.93516e-05	0.0227658	0.876067	0.965414
ENSMUSG00000021067.9	MGI:1927144	Sav1	salvador family WW domain containing 1	0.7137	1.27503e-09	1.67049e-08	-0.0081882	0.945349	0.986672
ENSMUSG00000021069.18	MGI:97829	Pygl	liver glycogen phosphorylase	2.20807	2.93227e-09	3.51079e-08	0.238951	0.525669	0.824126
ENSMUSG00000021070.7	MGI:102845	Bdkrb2	bradykinin receptor, beta 2	3.8015	1.57375e-11	3.23112e-10	0.612808	0.339909	0.705526
ENSMUSG00000021090.17	MGI:1925507	Lrrc9	leucine rich repeat containing 9	0.816939	0.000655456	0.002232	0.49146	0.0616289	0.344638
ENSMUSG00000021091.9	MGI:105045	Serpina3n	serine (or cysteine) peptidase inhibitor, clade A, member 3N	3.80985	1.66443e-14	6.58697e-13	1.00722	0.0425969	0.292883
ENSMUSG00000021108.19	MGI:97600	Prkch	protein kinase C, eta	1.73798	8.30002e-09	8.89717e-08	0.298749	0.333442	0.699933
ENSMUSG00000021109.14	MGI:106918	Hif1a	hypoxia inducible factor 1, alpha subunit	0.986255	3.14567e-09	3.74448e-08	-0.0698691	0.67596	0.896233
ENSMUSG00000021127.8	MGI:107946	Zfp36l1	zinc finger protein 36, C3H type-like 1	1.89142	3.90438e-13	1.14276e-11	0.606522	0.0207979	0.20892
ENSMUSG00000021143.11	MGI:1924399	Pacs2	phosphofurin acidic cluster sorting protein 2	0.926778	1.24083e-08	1.27545e-07	0.354875	0.0296875	0.249391
ENSMUSG00000021175.16	MGI:2384982	Cdca7l	cell division cycle associated 7 like	1.53235	1.75115e-07	1.3914e-06	0.431909	0.159393	0.520636
ENSMUSG00000021176.7	MGI:1926017	Efcab11	EF-hand calcium binding domain 11	3.48026	5.78808e-08	5.12554e-07	0.316962	0.614328	0.869713
ENSMUSG00000021185.17	MGI:2444813	Dglucy	D-glutamate cyclase	1.69656	1.2345e-09	1.62255e-08	0.16523	0.559451	0.841702
ENSMUSG00000021186.10	MGI:1346091	Fbln5	fibulin 5	3.31768	7.22886e-09	7.84836e-08	0.87384	0.131313	0.478202
ENSMUSG00000021190.15	MGI:1330838	Lgmn	legumain	3.01053	1.64136e-19	3.71839e-17	0.679562	0.0416428	0.289426
ENSMUSG00000021200.15	MGI:1929743	Asb2	ankyrin repeat and SOCS box-containing 2	1.84749	2.44456e-07	1.87554e-06	0.696603	0.0590416	0.33729
ENSMUSG00000021208.10	MGI:1916390	Ifi27l2b	interferon, alpha-inducible protein 27 like 2B	7.18302	7.24085e-09	7.85841e-08	1.22321	0.307977	0.67862
ENSMUSG00000021213.13	MGI:1351662	Akr1c13	aldo-keto reductase family 1, member C13	2.53585	0.000417107	0.00148375	1.54971	0.0899374	0.408226
ENSMUSG00000021223.14	MGI:2386139	Papln	papilin, proteoglycan-like sulfated glycoprotein	1.49789	0.000743198	0.0024965	0.216127	0.65073	0.885987
ENSMUSG00000021224.16	MGI:107423	Numb	NUMB endocytic adaptor protein	0.817401	4.89072e-07	3.48036e-06	-0.00618318	0.96992	0.99235
ENSMUSG00000021242.10	MGI:1915213	Npc2	NPC intracellular cholesterol transporter 2	2.78241	2.70572e-20	8.46155e-18	0.808543	0.00744132	0.120407
ENSMUSG00000021248.10	MGI:1915831	Tmed10	transmembrane p24 trafficking protein 10	0.703745	1.65531e-09	2.108e-08	0.0106206	0.927776	0.981599
ENSMUSG00000021250.14	MGI:95574	Fos	FBJ osteosarcoma oncogene	4.41708	3.07725e-13	9.22805e-12	0.939144	0.123172	0.465538
ENSMUSG00000021253.8	MGI:98727	Tgfb3	transforming growth factor, beta 3	1.39493	1.53945e-08	1.54974e-07	0.389529	0.121112	0.461128
ENSMUSG00000021256.6	MGI:2442543	Vash1	vasohibin 1	0.639342	1.37382e-08	1.39866e-07	0.196965	0.0851185	0.399115
ENSMUSG00000021257.15	MGI:1915987	Angel1	angel homolog 1	0.612401	0.000174193	0.00067507	0.175062	0.292942	0.666711
ENSMUSG00000021280.10	MGI:1921363	Exoc3l4	exocyst complex component 3-like 4	1.37	1.26634e-06	8.15988e-06	-0.124143	0.677361	0.896514
ENSMUSG00000021281.16	MGI:104960	Tnfaip2	tumor necrosis factor, alpha-induced protein 2	4.19432	3.93188e-13	1.1496e-11	0.564776	0.361199	0.720829
ENSMUSG00000021294.8	MGI:2447072	Kif26a	kinesin family member 26A	0.941126	2.8793e-05	0.000134634	0.600358	0.00910726	0.135481
ENSMUSG00000021298.9	MGI:1890220	Gpr132	G protein-coupled receptor 132	4.47474	1.96898e-05	9.58834e-05	1.57441	0.220232
ENSMUSG00000021303.15	MGI:102703	Gng4	guanine nucleotide binding protein (G protein), gamma 4	1.42878	0.000235567	0.000886409	-0.159951	0.682074	0.898948
ENSMUSG00000021306.12	MGI:1891463	Gpr137b	G protein-coupled receptor 137B	1.2522	1.97233e-06	1.21019e-05	0.0667552	0.80154	0.940508
ENSMUSG00000021318.16	MGI:95729	Gli3	GLI-Kruppel family member GLI3	0.885321	1.04121e-07	8.70073e-07	0.253948	0.133784	0.481936
ENSMUSG00000021322.9	MGI:1350928	Aoah	acyloxyacyl hydrolase	4.76131	9.0999e-09	9.66457e-08	1.10343	0.254731	0.632051
ENSMUSG00000021340.14	MGI:106604	Gpld1	glycosylphosphatidylinositol specific phospholipase D1	0.759989	1.20745e-18	1.91931e-16	0.272288	0.00181463	0.0550597
ENSMUSG00000021356.11	MGI:1096873	Irf4	interferon regulatory factor 4	2.06426	0.000788962	0.00263271	0.747811	0.255623	0.632885
ENSMUSG00000021360.17	MGI:1100870	Gcnt2	glucosaminyl (N-acetyl) transferase 2, I-branching enzyme	1.17472	3.33281e-06	1.92702e-05	0.0884771	0.726997	0.914908
ENSMUSG00000021361.8	MGI:1913404	Tmem14c	transmembrane protein 14C	0.687457	7.20174e-11	1.28139e-09	0.106182	0.322798	0.690518
ENSMUSG00000021362.8	MGI:1861438	Gcm2	glial cells missing homolog 2	4.77057	8.2784e-05	0.000347705	0.539271	0.730678
ENSMUSG00000021365.16	MGI:97302	Nedd9	neural precursor cell expressed, developmentally down-regulated gene 9	1.78493	6.15387e-13	1.71563e-11	0.696753	0.00541817	0.101134
ENSMUSG00000021366.9	MGI:96100	Hivep1	human immunodeficiency virus type I enhancer binding protein 1	0.647906	8.59508e-05	0.000359223	0.175883	0.289081	0.663733
ENSMUSG00000021384.15	MGI:1913579	Susd3	sushi domain containing 3	2.56265	4.30212e-10	6.40291e-09	0.737801	0.0852184	0.399115
ENSMUSG00000021408.16	MGI:108212	Ripk1	receptor (TNFRSF)-interacting serine-threonine kinase 1	1.87321	1.14536e-14	4.80369e-13	0.407154	0.0994963	0.42685
ENSMUSG00000021411.17	MGI:1914145	Pxdc1	PX domain containing 1	0.861679	0.00100042	0.00325197	-0.403081	0.130824	0.477732
ENSMUSG00000021417.16	MGI:1346064	Eci2	enoyl-Coenzyme A delta isomerase 2	0.664291	3.94084e-08	3.60901e-07	0.104298	0.39467	0.740831
ENSMUSG00000021423.7	MGI:1321404	Ly86	lymphocyte antigen 86	4.06559	2.56626e-19	5.31179e-17	1.07293	0.0181359	0.196611
ENSMUSG00000021451.17	MGI:109244	Sema4d	sema domain, immunoglobulin domain (Ig), transmembrane domain (TM) and short cytoplasmic domain, (semaphorin) 4D	1.17898	7.6757e-09	8.27647e-08	0.554023	0.00679622	0.114918
ENSMUSG00000021453.3	MGI:1346325	Gadd45g	growth arrest and DNA-damage-inducible 45 gamma	1.94488	4.30183e-13	1.24766e-11	0.636758	0.018896	0.200127
ENSMUSG00000021457.15	MGI:99515	Syk	spleen tyrosine kinase	2.72485	8.34656e-14	2.83852e-12	0.642075	0.083227	0.395793
ENSMUSG00000021464.16	MGI:1347521	Ror2	receptor tyrosine kinase-like orphan receptor 2	1.91748	0.0024016	0.00707593	0.476538	0.427912	0.765756
ENSMUSG00000021469.10	MGI:97169	Msx2	msh homeobox 2	1.79086	3.63572e-05	0.000166778	0.984421	0.0520198	0.320831
ENSMUSG00000021477.10	MGI:88564	Ctsl	cathepsin L	2.79797	5.8679e-17	5.05273e-15	0.569933	0.0886745	0.405506
ENSMUSG00000021478.7	MGI:99578	Drd1	dopamine receptor D1	1.26819	0.000318954	0.00116544	1.13926	0.00125438	0.043416
ENSMUSG00000021485.15	MGI:104987	Mxd3	Max dimerization protein 3	2.00989	4.06318e-08	3.70646e-07	0.652475	0.10548	0.435491
ENSMUSG00000021540.17	MGI:1328787	Smad5	SMAD family member 5	0.635165	5.06117e-10	7.36917e-09	0.16062	0.120016	0.459829
ENSMUSG00000021550.7	MGI:1917403	2210016F16Rik	RIKEN cDNA 2210016F16 gene	0.811929	7.27422e-08	6.30001e-07	0.279219	0.0742361	0.376833
ENSMUSG00000021569.11	MGI:1916966	Trip13	thyroid hormone receptor interactor 13	1.32723	0.000313876	0.00114848	0.459165	0.26874	0.644814
ENSMUSG00000021579.5	MGI:2145269	Lrrc14b	leucine rich repeat containing 14B	2.91171	0.00114132	0.00366033	2.12968	0.0880651
ENSMUSG00000021583.8	MGI:1933403	Erap1	endoplasmic reticulum aminopeptidase 1	1.80273	5.98076e-15	2.7013e-13	0.175388	0.454406	0.782198
ENSMUSG00000021585.11	MGI:1098236	Cast	calpastatin	1.26808	7.32908e-07	5.01224e-06	0.0169417	0.948123	0.987121
ENSMUSG00000021592.19	MGI:1924291	Arsk	arylsulfatase K	0.765125	5.60808e-06	3.08391e-05	0.145096	0.401572	0.746364
ENSMUSG00000021594.12	MGI:98400	Srd5a1	steroid 5 alpha-reductase 1	0.644273	0.00166824	0.00512514	0.0663276	0.750028	0.921944
ENSMUSG00000021608.16	MGI:2384812	Lpcat1	lysophosphatidylcholine acyltransferase 1	0.885999	3.7466e-09	4.38185e-08	0.0166275	0.91266	0.977123
ENSMUSG00000021614.17	MGI:102889	Vcan	versican	1.64755	3.55759e-11	6.79201e-10	0.0379389	0.879592	0.965932
ENSMUSG00000021624.10	MGI:1194924	Cd180	CD180 antigen	4.74036	9.97858e-26	3.58867e-22	1.46659	0.0013369	0.0456902
ENSMUSG00000021640.7	MGI:1298223	Naip1	NLR family, apoptosis inhibitory protein 1	2.73659	5.02339e-09	5.71257e-08	0.918903	0.0743718	0.377022
ENSMUSG00000021647.8	MGI:1351330	Cartpt	CART prepropeptide	8.94974	2.6708e-18	3.65912e-16	0.142332	0.891412	0.970415
ENSMUSG00000021665.10	MGI:96074	Hexb	hexosaminidase B	3.17938	5.60114e-19	1.01352e-16	0.720929	0.0437261	0.295049
ENSMUSG00000021670.15	MGI:96159	Hmgcr	3-hydroxy-3-methylglutaryl-Coenzyme A reductase	1.07149	0.0006507	0.00221737	0.0350852	0.911166	0.976779
ENSMUSG00000021680.9	MGI:88497	Crhbp	corticotropin releasing hormone binding protein	1.43622	0.00111535	0.00358543	0.692478	0.117136	0.454363
ENSMUSG00000021696.10	MGI:1921809	Elovl7	ELOVL family member 7, elongation of long chain fatty acids (yeast)	0.985419	1.58728e-05	7.89551e-05	0.397888	0.0862659	0.401315
ENSMUSG00000021697.13	MGI:2145425	Depdc1b	DEP domain containing 1B	2.2696	7.25455e-07	4.96481e-06	0.946886	0.0630945	0.348123
ENSMUSG00000021707.6	MGI:94890	Dhfr	dihydrofolate reductase	1.12904	6.60753e-10	9.36018e-09	0.255462	0.181623	0.551651
ENSMUSG00000021709.15	MGI:1890169	Erbin	Erbb2 interacting protein	1.19207	7.37306e-11	1.30783e-09	0.2021	0.271066	0.647256
ENSMUSG00000021714.16	MGI:1926210	Cenpk	centromere protein K	1.71313	2.34835e-07	1.80669e-06	0.14451	0.687835	0.901899
ENSMUSG00000021720.12	MGI:1919066	Rnf180	ring finger protein 180	1.06877	6.79556e-15	3.02187e-13	0.355838	0.0111899	0.151916
ENSMUSG00000021750.17	MGI:3041256	Fam107a	family with sequence similarity 107, member A	0.720457	7.12535e-05	0.000303889	0.169395	0.350586	0.713921
ENSMUSG00000021751.14	MGI:1934852	Acox2	acyl-Coenzyme A oxidase 2, branched chain	5.67235	3.87878e-05	0.000176716	1.50548	0.254746
ENSMUSG00000021754.18	MGI:1346872	Map3k1	mitogen-activated protein kinase kinase kinase 1	1.23831	1.54598e-08	1.55576e-07	0.161183	0.467988	0.791458
ENSMUSG00000021756.13	MGI:96560	Il6st	interleukin 6 signal transducer	1.23536	2.10813e-14	8.1853e-13	0.230423	0.155443	0.516005
ENSMUSG00000021759.15	MGI:108412	Plpp1	phospholipid phosphatase 1	0.588383	4.2825e-05	0.00019285	0.312825	0.0319695	0.258681
ENSMUSG00000021760.6	MGI:1916840	Gpx8	glutathione peroxidase 8 (putative)	2.29439	9.41188e-14	3.15973e-12	0.78544	0.013049	0.165013
ENSMUSG00000021763.18	MGI:3040697	Cspg4b	chondroitin sulfate proteoglycan 4B	1.92886	5.81426e-11	1.05541e-09	1.01321	0.000874533	0.0346842
ENSMUSG00000021773.12	MGI:1916406	Comtd1	catechol-O-methyltransferase domain containing 1	0.920614	1.81147e-07	1.43338e-06	0.558223	0.00211247	0.0603735
ENSMUSG00000021806.5	MGI:1298229	Nid2	nidogen 2	1.75913	1.89975e-10	3.07238e-09	0.41794	0.143007	0.496327
ENSMUSG00000021822.4	MGI:97611	Plau	plasminogen activator, urokinase	3.5355	3.26363e-16	2.14869e-14	1.02876	0.0206654	0.208094
ENSMUSG00000021835.16	MGI:88180	Bmp4	bone morphogenetic protein 4	1.69195	6.68097e-06	3.61176e-05	-0.352607	0.385421	0.734749
ENSMUSG00000021838.18	MGI:1921730	Samd4	sterile alpha motif domain containing 4	1.39689	6.00296e-10	8.57127e-09	-0.0917676	0.687695	0.901868
ENSMUSG00000021871.20	MGI:6121535	Gm49342	predicted gene, 49342	1.89549	4.90799e-15	2.25977e-13	0.254257	0.304899	0.675748
ENSMUSG00000021876.16	MGI:1926217	Rnase4	ribonuclease, RNase A family 4	2.61025	1.53793e-14	6.16263e-13	0.339277	0.320681	0.688844
ENSMUSG00000021880.8	MGI:1925666	Rnase6	ribonuclease, RNase A family, 6	2.54177	1.45884e-07	1.17933e-06	1.47499	0.0110947	0.151335
ENSMUSG00000021884.19	MGI:1929657	Hacl1	2-hydroxyacyl-CoA lyase 1	0.763956	3.42719e-09	4.04611e-08	0.433875	0.00145227	0.0480902
ENSMUSG00000021886.8	MGI:108031	Gpr65	G-protein coupled receptor 65	5.81362	2.23441e-16	1.54913e-14	2.01171	0.0101775	0.14345
ENSMUSG00000021890.7	MGI:1921677	Eaf1	ELL associated factor 1	1.05579	4.8066e-12	1.09407e-10	0.243813	0.114291	0.449105
ENSMUSG00000021900.11	MGI:1347001	Btd	biotinidase	1.13251	2.11404e-11	4.23265e-10	0.540077	0.00195373	0.0572623
ENSMUSG00000021903.12	MGI:1926004	Galnt15	polypeptide N-acetylgalactosaminyltransferase 15	2.38256	3.44141e-11	6.60526e-10	0.87681	0.0162408	0.184512
ENSMUSG00000021932.14	MGI:1914403	Rnaseh2b	ribonuclease H2, subunit B	0.649084	3.81381e-05	0.000174087	0.0994236	0.540225	0.831297
ENSMUSG00000021939.9	MGI:88561	Ctsb	cathepsin B	2.79464	4.08321e-17	3.65975e-15	0.342966	0.302098	0.674692
ENSMUSG00000021965.4	MGI:3041235	Ska3	spindle and kinetochore associated complex subunit 3	1.76492	9.51118e-07	6.32269e-06	0.239049	0.531316	0.825892
ENSMUSG00000021973.10	MGI:1915764	Micu2	mitochondrial calcium uptake 2	0.965677	2.26994e-14	8.74889e-13	0.113464	0.376839	0.730178
ENSMUSG00000021978.10	MGI:1860765	Extl3	exostosin-like glycosyltransferase 3	0.585514	4.56102e-07	3.27653e-06	0.0765286	0.510896	0.816762
ENSMUSG00000021998.17	MGI:104808	Lcp1	lymphocyte cytosolic protein 1	3.42371	8.31262e-18	9.52838e-16	0.771781	0.0543698	0.325568
ENSMUSG00000022014.16	MGI:1915168	Epsti1	epithelial stromal interaction 1 (breast)	4.26088	5.60314e-16	3.37962e-14	2.06939	0.000248156	0.0152608
ENSMUSG00000022015.9	MGI:1100089	Tnfsf11	tumor necrosis factor (ligand) superfamily, member 11	4.45813	0.000240675	0.000903387	-1.38079	0.381875
ENSMUSG00000022021.15	MGI:1927222	Diaph3	diaphanous related formin 3	1.41896	5.58629e-07	3.9153e-06	0.246573	0.412654	0.753893
ENSMUSG00000022025.14	MGI:1341171	Cnmd	chondromodulin	2.48488	7.90125e-10	1.09502e-08	0.844035	0.0617411	0.344731
ENSMUSG00000022032.15	MGI:1918395	Scara5	scavenger receptor class A, member 5	3.12427	2.45051e-05	0.000116631	0.781597	0.320784	0.688875
ENSMUSG00000022033.10	MGI:1289156	Pbk	PDZ binding kinase	4.36484	6.0044e-20	1.59956e-17	0.857337	0.0749767	0.378901
ENSMUSG00000022034.11	MGI:1919238	Esco2	establishment of sister chromatid cohesion N-acetyltransferase 2	3.4383	2.78937e-11	5.44826e-10	1.08176	0.0423919	0.292176
ENSMUSG00000022074.7	MGI:1341090	Tnfrsf10b	tumor necrosis factor receptor superfamily, member 10b	2.86243	9.75817e-11	1.67733e-09	0.756702	0.129253	0.47497
ENSMUSG00000022090.11	MGI:2384850	Pdlim2	PDZ and LIM domain 2	1.76139	2.2631e-09	2.78493e-08	0.632925	0.0345162	0.267019
ENSMUSG00000022091.7	MGI:700013	Sorbs3	sorbin and SH3 domain containing 3	1.24053	7.69455e-09	8.29138e-08	0.592077	0.00637767	0.110834
ENSMUSG00000022094.16	MGI:2384851	Slc39a14	solute carrier family 39 (zinc transporter), member 14	0.63276	2.91225e-07	2.19686e-06	-0.0961498	0.439204	0.772824
ENSMUSG00000022096.15	MGI:96223	Hr	lysine demethylase and nuclear receptor corepressor	1.65989	5.21254e-07	3.68205e-06	0.368534	0.26936	0.645514
ENSMUSG00000022102.14	MGI:1332623	Dok2	docking protein 2	1.30229	0.00197579	0.00596867	0.806278	0.0533541	0.324005
ENSMUSG00000022106.15	MGI:1917200	Rcbtb2	regulator of chromosome condensation (RCC1) and BTB (POZ) domain containing protein 2	1.19197	6.1361e-12	1.3733e-10	0.00927042	0.957631	0.989276
ENSMUSG00000022108.9	MGI:1309517	Itm2b	integral membrane protein 2B	0.797579	2.63778e-09	3.19006e-08	0.0433911	0.746206	0.920748
ENSMUSG00000022114.6	MGI:1345138	Spry2	sprouty RTK signaling antagonist 2	0.821632	0.000540394	0.00187367	0.00989127	0.966922	0.991687
ENSMUSG00000022122.16	MGI:102720	Ednrb	endothelin receptor type B	0.976597	7.37264e-13	2.01633e-11	0.353384	0.0098435	0.141776
ENSMUSG00000022123.10	MGI:1891228	Scel	sciellin	1.42123	8.56316e-05	0.000358253	-0.151974	0.688482	0.902044
ENSMUSG00000022125.8	MGI:2442253	Cln5	ceroid-lipofuscinosis, neuronal 5	1.27882	1.2556e-09	1.64653e-08	0.257668	0.229784	0.607394
ENSMUSG00000022126.7	MGI:103206	Acod1	aconitate decarboxylase 1	3.95988	8.5826e-05	0.000358784	1.62625	0.206889
ENSMUSG00000022129.5	MGI:102563	Dct	dopachrome tautomerase	1.89671	0.000565862	0.00195302	1.20143	0.045664	0.301235
ENSMUSG00000022136.9	MGI:107373	Dnajc3	DnaJ heat shock protein family (Hsp40) member C3	0.715414	8.45362e-07	5.68801e-06	-0.0593364	0.684651	0.899933
ENSMUSG00000022144.5	MGI:107430	Gdnf	glial cell line derived neurotrophic factor	6.68512	4.55803e-09	5.24347e-08	1.25276	0.326547	0.693928
ENSMUSG00000022146.13	MGI:1330819	Osmr	oncostatin M receptor	3.37747	2.03288e-17	2.05944e-15	1.08799	0.00674011	0.114476
ENSMUSG00000022148.17	MGI:1346327	Fyb	FYN binding protein	2.89105	1.01347e-16	8.04911e-15	0.842904	0.0167049	0.188003
ENSMUSG00000022150.17	MGI:109175	Dab2	disabled 2, mitogen-responsive phosphoprotein	2.72464	2.52647e-13	7.70828e-12	0.393212	0.2957	0.669888
ENSMUSG00000022175.10	MGI:1929480	Lrp10	low-density lipoprotein receptor-related protein 10	1.06121	1.3001e-12	3.36377e-11	0.27842	0.0659933	0.354463
ENSMUSG00000022177.10	MGI:1261794	Haus4	HAUS augmin-like complex, subunit 4	1.02239	9.0484e-06	4.75318e-05	-0.0372329	0.875946	0.965414
ENSMUSG00000022178.12	MGI:1341886	Ajuba	ajuba LIM protein	1.94349	2.51847e-09	3.0625e-08	0.16776	0.625291	0.87489
ENSMUSG00000022184.9	MGI:2146220	Fbxo4	F-box protein 4	0.831733	1.90372e-06	1.1746e-05	-0.0183418	0.919512	0.978831
ENSMUSG00000022203.8	MGI:105311	Efs	embryonal Fyn-associated substrate	1.01412	1.37566e-07	1.12077e-06	0.524556	0.0080122	0.126766
ENSMUSG00000022210.8	MGI:90169	Dhrs4	dehydrogenase/reductase (SDR family) member 4	0.877526	3.94936e-09	4.60215e-08	0.453028	0.00339603	0.0788451
ENSMUSG00000022216.18	MGI:1096367	Psme1	proteasome (prosome, macropain) activator subunit 1 (PA28 alpha)	1.55995	2.36465e-16	1.60835e-14	0.398684	0.0375975	0.277269
ENSMUSG00000022218.17	MGI:98730	Tgm1	transglutaminase 1, K polypeptide	8.18732	2.20738e-17	2.20516e-15	3.17125	0.00677175	0.114692
ENSMUSG00000022220.15	MGI:99674	Adcy4	adenylate cyclase 4	0.936528	7.29174e-05	0.000310617	0.129989	0.587518	0.85847
ENSMUSG00000022221.15	MGI:2154952	Ripk3	receptor-interacting serine-threonine kinase 3	2.82313	6.77118e-07	4.66672e-06	1.02991	0.136569	0.487221
ENSMUSG00000022236.11	MGI:2182357	Ropn1l	ropporin 1-like	1.44563	7.61598e-06	4.06907e-05	0.608496	0.130249	0.476703
ENSMUSG00000022246.15	MGI:1922896	Rai14	retinoic acid induced 14	2.18628	2.71716e-08	2.57834e-07	0.375258	0.348878	0.712487
ENSMUSG00000022261.7	MGI:1349165	Sdc2	syndecan 2	1.02828	8.75529e-12	1.89113e-10	0.191912	0.206824	0.581049
ENSMUSG00000022270.17	MGI:1913520	Retreg1	reticulophagy regulator 1	0.609057	6.28004e-09	6.95738e-08	0.110406	0.298803	0.671699
ENSMUSG00000022283.16	MGI:1349722	Pabpc1	poly(A) binding protein, cytoplasmic 1	1.00419	6.88519e-15	3.057e-13	0.117971	0.361438	0.720908
ENSMUSG00000022297.16	MGI:108474	Fzd6	frizzled class receptor 6	1.21713	4.43426e-11	8.23615e-10	0.438889	0.0191934	0.201623
ENSMUSG00000022309.10	MGI:108448	Angpt1	angiopoietin 1	1.20218	1.22882e-09	1.6173e-08	0.554229	0.00634576	0.110745
ENSMUSG00000022322.9	MGI:1338802	Shcbp1	Shc SH2-domain binding protein 1	2.46304	4.58386e-10	6.74935e-09	0.273836	0.511313	0.816789
ENSMUSG00000022323.12	MGI:1095401	Rida	reactive intermediate imine deaminase A homolog	0.850596	8.27819e-10	1.13958e-08	0.404809	0.00385286	0.083538
ENSMUSG00000022346.18	MGI:97250	Myc	myelocytomatosis oncogene	1.45476	1.22209e-07	1.00702e-06	0.201583	0.479369	0.799166
ENSMUSG00000022357.3	MGI:3045310	Klhl38	kelch-like 38	1.89984	4.40125e-06	2.48145e-05	0.185823	0.665114	0.892714
ENSMUSG00000022367.8	MGI:107821	Has2	hyaluronan synthase 2	3.7131	3.6706e-09	4.31225e-08	0.22873	0.739933	0.918272
ENSMUSG00000022369.14	MGI:2146005	Mtbp	Mdm2, transformed 3T3 cell double minute p53 binding protein	1.12811	1.33503e-06	8.56798e-06	0.29447	0.241057	0.618983
ENSMUSG00000022372.15	MGI:104295	Sla	src-like adaptor	3.22226	6.43736e-16	3.78751e-14	0.762486	0.0596502	0.339009
ENSMUSG00000022385.12	MGI:1352755	Gtse1	G two S phase expressed protein 1	3.25306	1.20063e-13	3.93882e-12	0.607952	0.193495	0.566087
ENSMUSG00000022422.14	MGI:1919357	Dscc1	DNA replication and sister chromatid cohesion 1	3.71043	2.7056e-06	1.60203e-05	0.620727	0.369318	0.725244
ENSMUSG00000022425.17	MGI:1321390	Enpp2	ectonucleotide pyrophosphatase/phosphodiesterase 2	0.79163	0.00132537	0.00417932	0.314531	0.202802	0.575617
ENSMUSG00000022438.7	MGI:2153063	Parvb	parvin, beta	0.917089	1.94574e-05	9.48991e-05	-0.109608	0.611606	0.868803
ENSMUSG00000022439.10	MGI:2158329	Parvg	parvin, gamma	1.39235	2.04075e-10	3.27099e-09	-0.122308	0.579512	0.853671
ENSMUSG00000022440.10	MGI:1919959	C1qtnf6	C1q and tumor necrosis factor related protein 6	0.967191	2.3239e-05	0.000111398	-0.0787938	0.737912	0.91794
ENSMUSG00000022443.18	MGI:107717	Myh9	myosin, heavy polypeptide 9, non-muscle	1.20183	5.37366e-13	1.51872e-11	0.231647	0.165473	0.529694
ENSMUSG00000022453.9	MGI:1261422	Naga	N-acetyl galactosaminidase, alpha	1.36759	9.11456e-16	5.12779e-14	0.316358	0.0672295	0.358813
ENSMUSG00000022468.13	MGI:97746	Endou	endonuclease, polyU-specific	2.33843	1.25342e-08	1.28655e-07	1.38617	0.00221888	0.0614593
ENSMUSG00000022479.16	MGI:103076	Vdr	vitamin D (1,25-dihydroxyvitamin D3) receptor	4.41493	1.58901e-07	1.27524e-06	1.63889	0.0592191	0.337836
ENSMUSG00000022483.18	MGI:88452	Col2a1	collagen, type II, alpha 1	3.67035	3.72119e-11	7.06217e-10	0.920146	0.106104	0.435942
ENSMUSG00000022488.10	MGI:1926063	Nckap1l	NCK associated protein 1 like	3.1326	2.78362e-18	3.77771e-16	0.852806	0.0182055	0.196677
ENSMUSG00000022500.16	MGI:1929512	Litaf	LPS-induced TN factor	2.39349	2.3832e-15	1.19872e-13	0.480608	0.116712	0.453556
ENSMUSG00000022504.11	MGI:108445	Ciita	class II transactivator	3.80677	3.02477e-07	2.27399e-06	0.557934	0.516325	0.819052
ENSMUSG00000022544.15	MGI:1917761	Eef2kmt	eukaryotic elongation factor 2 lysine methyltransferase	1.26599	6.59796e-09	7.25927e-08	0.180679	0.431823	0.768202
ENSMUSG00000022548.15	MGI:88056	Apod	apolipoprotein D	2.42302	3.54034e-12	8.29472e-11	0.726508	0.0373459	0.276747
ENSMUSG00000022574.8	MGI:2442664	Naprt	nicotinate phosphoribosyltransferase	1.50237	8.45013e-15	3.65592e-13	0.307493	0.120402	0.460118
ENSMUSG00000022575.6	MGI:1916396	Gsdmd	gasdermin D	3.06899	6.55049e-19	1.16336e-16	1.28048	0.000311672	0.0180436
ENSMUSG00000022586.12	MGI:1888480	Ly6i	lymphocyte antigen 6 complex, locus I	1.67898	1.05968e-06	6.97187e-06	1.09067	0.00858106	0.131665
ENSMUSG00000022587.15	MGI:106651	Ly6e	lymphocyte antigen 6 complex, locus E	1.50977	1.29963e-10	2.17682e-09	0.20782	0.376742	0.730178
ENSMUSG00000022602.15	MGI:88067	Arc	activity regulated cytoskeletal-associated protein	1.94102	1.91177e-06	1.17856e-05	0.422127	0.300728	0.673303
ENSMUSG00000022610.11	MGI:1353438	Mapk12	mitogen-activated protein kinase 12	1.3145	8.16283e-05	0.000343553	0.287944	0.394313	0.740551
ENSMUSG00000022614.9	MGI:2146015	Lmf2	lipase maturation factor 2	1.21925	4.04259e-14	1.46485e-12	0.210451	0.200319	0.573533
ENSMUSG00000022620.15	MGI:88077	Arsa	arylsulfatase A	0.744564	9.6145e-11	1.6564e-09	0.363292	0.00186988	0.055915
ENSMUSG00000022665.16	MGI:1915146	Ccdc80	coiled-coil domain containing 80	2.98157	1.13388e-17	1.23305e-15	0.618176	0.0810588	0.39166
ENSMUSG00000022667.19	MGI:1889024	Cd200r1	CD200 receptor 1	3.01162	5.12366e-07	3.62818e-06	1.2368	0.0826739	0.394707
ENSMUSG00000022673.6	MGI:103199	Mcm4	minichromosome maintenance complex component 4	1.05117	4.31416e-10	6.41461e-09	0.27463	0.110794	0.443638
ENSMUSG00000022678.17	MGI:1914453	Nde1	nudE neurodevelopment protein 1	0.885166	2.05337e-06	1.25537e-05	0.319925	0.089399	0.407339
ENSMUSG00000022686.15	MGI:2137302	B3gnt5	UDP-GlcNAc:betaGal beta-1,3-N-acetylglucosaminyltransferase 5	3.05984	5.50134e-15	2.50046e-13	1.04465	0.00986168	0.141881
ENSMUSG00000022701.19	MGI:1922661	Ccdc191	coiled-coil domain containing 191	0.597161	0.000649095	0.00221243	-0.0476467	0.789022	0.936304
ENSMUSG00000022723.17	MGI:2676311	Crybg3	beta-gamma crystallin domain containing 3	1.04833	2.14256e-06	1.30297e-05	-0.0261914	0.907686	0.975496
ENSMUSG00000022747.18	MGI:1888707	St3gal6	ST3 beta-galactoside alpha-2,3-sialyltransferase 6	1.49044	3.17099e-10	4.87094e-09	0.434013	0.0714936	0.369816
ENSMUSG00000022766.15	MGI:96051	Serpind1	serine (or cysteine) peptidase inhibitor, clade D, member 1	1.74239	1.09759e-05	5.65824e-05	0.9999	0.0201543	0.206353
ENSMUSG00000022769.10	MGI:2149842	Sdf2l1	stromal cell-derived factor 2-like 1	1.65879	3.69045e-07	2.71624e-06	-0.0820796	0.804132	0.941034
ENSMUSG00000022781.9	MGI:1339984	Pak2	p21 (RAC1) activated kinase 2	0.678315	8.33024e-10	1.14565e-08	-0.030652	0.78347	0.933505
ENSMUSG00000022790.15	MGI:2388477	Igsf11	immunoglobulin superfamily, member 11	0.585045	2.06669e-05	0.00010017	-0.0449869	0.74544	0.920353
ENSMUSG00000022799.5	MGI:1333857	Arhgap31	Rho GTPase activating protein 31	1.5706	6.1479e-12	1.3733e-10	0.169821	0.459687	0.785716
ENSMUSG00000022807.10	MGI:2146553	Osbpl11	oxysterol binding protein-like 11	0.695085	8.71988e-10	1.19214e-08	0.24395	0.0340977	0.264942
ENSMUSG00000022816.12	MGI:102793	Fstl1	follistatin-like 1	1.27805	7.3797e-09	7.98201e-08	0.360885	0.103932	0.433322
ENSMUSG00000022817.16	MGI:96614	Itgb5	integrin beta 5	2.91249	3.87239e-19	7.32976e-17	0.939708	0.00399466	0.0853585
ENSMUSG00000022824.13	MGI:103190	Muc13	mucin 13, epithelial transmembrane	2.8596	0.00224342	0.00666515	2.40141	0.0223906
ENSMUSG00000022831.15	MGI:104568	Hcls1	hematopoietic cell specific Lyn substrate 1	3.19293	1.06685e-17	1.18055e-15	0.995792	0.00871286	0.132573
ENSMUSG00000022860.16	MGI:2179069	Chodl	chondrolectin	4.56287	0.000809321	0.0026919	1.16678	0.424034
ENSMUSG00000022876.19	MGI:1914992	Samsn1	SAM domain, SH3 domain and nuclear localization signals, 1	3.42691	1.58121e-17	1.64234e-15	1.07441	0.0104962	0.146444
ENSMUSG00000022885.17	MGI:108470	St6gal1	beta galactoside alpha 2,6 sialyltransferase 1	1.51892	6.28019e-11	1.13213e-09	0.537034	0.0217968	0.213251
ENSMUSG00000022887.10	MGI:88492	Masp1	mannan-binding lectin serine peptidase 1	1.21129	8.4226e-07	5.67111e-06	0.457277	0.0657538	0.354238
ENSMUSG00000022893.15	MGI:109249	Adamts1	a disintegrin-like and metallopeptidase (reprolysin type) with thrombospondin type 1 motif, 1	2.21248	2.59471e-07	1.97598e-06	-0.433471	0.31504	0.685129
ENSMUSG00000022894.7	MGI:1346321	Adamts5	a disintegrin-like and metallopeptidase (reprolysin type) with thrombospondin type 1 motif, 5 (aggrecanase-2)	2.38455	1.66076e-07	1.32912e-06	0.0760859	0.870185	0.963437
ENSMUSG00000022898.14	MGI:1206040	Vps26c	VPS26 endosomal protein sorting factor C	0.77088	6.77014e-11	1.21134e-09	0.203252	0.0899296	0.408226
ENSMUSG00000022900.15	MGI:2146574	Ildr1	immunoglobulin-like domain containing receptor 1	4.1527	6.3052e-05	0.000272342	-0.213526	0.805617
ENSMUSG00000022906.16	MGI:1933117	Parp9	poly (ADP-ribose) polymerase family, member 9	3.09063	1.45492e-19	3.37576e-17	1.16791	0.000779262	0.0322683
ENSMUSG00000022912.9	MGI:1095733	Pros1	protein S (alpha)	2.54306	1.66645e-15	8.82974e-14	0.539519	0.0935461	0.415644
ENSMUSG00000022945.13	MGI:1314881	Chaf1b	chromatin assembly factor 1, subunit B (p60)	2.96328	2.12489e-11	4.25141e-10	1.62954	0.00109531	0.0394982
ENSMUSG00000022947.9	MGI:1309992	Cbr3	carbonyl reductase 3	0.751213	7.9539e-06	4.23314e-05	0.115231	0.511122	0.816789
ENSMUSG00000022952.18	MGI:99852	Runx1	runt related transcription factor 1	3.8443	9.8365e-14	3.28694e-12	1.28114	0.0170625	0.189447
ENSMUSG00000022969.14	MGI:109380	Il10rb	interleukin 10 receptor, beta	2.19356	5.95426e-15	2.69356e-13	0.324379	0.252634	0.630685
ENSMUSG00000022971.19	MGI:1098243	Ifnar2	interferon (alpha and beta) receptor 2	1.63147	6.36328e-14	2.23538e-12	0.286802	0.192043	0.564545
ENSMUSG00000022991.6	MGI:96742	Lalba	lactalbumin, alpha	4.89045	0.000176286	0.000682259	1.88083	0.216898
ENSMUSG00000022996.16	MGI:108061	Wnt10b	wingless-type MMTV integration site family, member 10B	2.25621	1.9583e-05	9.5479e-05	-0.0865303	0.881634	0.9668
ENSMUSG00000023000.6	MGI:94891	Dhh	desert hedgehog	2.98051	2.87455e-05	0.000134434	0.868446	0.291612	0.665515
ENSMUSG00000023008.19	MGI:109569	Fmnl3	formin-like 3	2.09838	2.26359e-15	1.14256e-13	0.49516	0.0640027	0.350811
ENSMUSG00000023009.15	MGI:3609653	Nckap5l	NCK-associated protein 5-like	0.608108	6.52104e-07	4.50353e-06	0.420211	0.000743196	0.0312127
ENSMUSG00000023010.16	MGI:99682	Tmbim6	transmembrane BAX inhibitor motif containing 6	0.794037	6.49278e-16	3.8023e-14	0.142482	0.148082	0.503272
ENSMUSG00000023015.15	MGI:1349423	Racgap1	Rac GTPase-activating protein 1	1.84654	1.55237e-10	2.55949e-09	0.53638	0.0668569	0.357312
ENSMUSG00000023022.15	MGI:1920992	Lima1	LIM domain and actin binding 1	1.1589	7.29261e-08	6.31404e-07	0.359826	0.0985151	0.425033
ENSMUSG00000023027.14	MGI:1298366	Atf1	activating transcription factor 1	0.796513	1.6349e-09	2.08685e-08	0.149245	0.278341	0.653917
ENSMUSG00000023031.9	MGI:95314	Cela1	chymotrypsin-like elastase family, member 1	3.27513	1.68182e-12	4.24452e-11	0.952798	0.0453451	0.300598
ENSMUSG00000023034.8	MGI:1352454	Nr4a1	nuclear receptor subfamily 4, group A, member 1	1.99698	1.90397e-05	9.2972e-05	0.40445	0.387351	0.73558
ENSMUSG00000023045.14	MGI:1332226	Soat2	sterol O-acyltransferase 2	4.19752	1.1973e-06	7.76372e-06	-0.0175025	0.984356	0.996503
ENSMUSG00000023067.15	MGI:104556	Cdkn1a	cyclin-dependent kinase inhibitor 1A (P21)	3.14284	8.51489e-16	4.84128e-14	0.213628	0.589413	0.859253
ENSMUSG00000023078.7	MGI:1888499	Cxcl13	chemokine (C-X-C motif) ligand 13	8.29476	1.0361e-07	8.66311e-07	3.88469	0.0159511	0.183209
ENSMUSG00000023143.11	MGI:1351598	Nagpa	N-acetylglucosamine-1-phosphodiester alpha-N-acetylglucosaminidase	1.57379	1.32325e-11	2.76882e-10	0.427846	0.072775	0.372677
ENSMUSG00000023186.15	MGI:1915026	Vwa5a	von Willebrand factor A domain containing 5A	1.66452	1.68437e-13	5.36667e-12	0.5483	0.016017	0.183363
ENSMUSG00000023206.17	MGI:104644	Il15ra	interleukin 15 receptor, alpha chain	0.589953	0.00342466	0.00971323	0.625274	0.00203674	0.0591914
ENSMUSG00000023224.13	MGI:894696	Serping1	serine (or cysteine) peptidase inhibitor, clade G, member 1	3.04027	3.54409e-16	2.29656e-14	1.12575	0.00283562	0.0704428
ENSMUSG00000023243.10	MGI:1336175	Kcnk5	potassium channel, subfamily K, member 5	1.71465	0.000237535	0.000892766	0.549473	0.32708	0.694098
ENSMUSG00000023249.16	MGI:1891258	Parp3	poly (ADP-ribose) polymerase family, member 3	3.56627	1.16087e-16	8.97831e-15	1.60599	0.000235592	0.0148936
ENSMUSG00000023272.5	MGI:1923987	Creld2	cysteine-rich with EGF-like domains 2	0.876987	3.67249e-05	0.000168331	0.18755	0.384374	0.734173
ENSMUSG00000023274.15	MGI:88335	Cd4	CD4 antigen	3.96801	1.0768e-06	7.0732e-06	1.39573	0.149412	0.505784
ENSMUSG00000023277.14	MGI:1346078	Twf2	twinfilin actin binding protein 2	0.61738	5.73108e-08	5.08289e-07	0.188932	0.101067	0.429094
ENSMUSG00000023348.12	MGI:1343458	Trip6	thyroid hormone receptor interactor 6	1.03825	3.72652e-09	4.36546e-08	0.570554	0.00175458	0.0539508
ENSMUSG00000023349.15	MGI:1861231	Clec4n	C-type lectin domain family 4, member n	2.85486	0.000117521	0.000474207	-0.190095	0.808993	0.943194
ENSMUSG00000023367.15	MGI:1913308	Tmem176a	transmembrane protein 176A	2.64269	5.13093e-15	2.35067e-13	0.239594	0.482667	0.801587
ENSMUSG00000023393.16	MGI:1919107	Slc17a9	solute carrier family 17, member 9	1.73685	0.000161602	0.000631463	-0.00541415	0.991504	0.998099
ENSMUSG00000023411.13	MGI:1920431	Nfatc4	nuclear factor of activated T cells, cytoplasmic, calcineurin dependent 4	1.1715	0.000396262	0.00141766	0.628623	0.0734253	0.374169
ENSMUSG00000023505.14	MGI:1315198	Cdca3	cell division cycle associated 3	3.57464	1.42173e-16	1.05971e-14	1.3333	0.00279582	0.0697788
ENSMUSG00000023882.16	MGI:99201	Zfp54	zinc finger protein 54	0.765877	0.000957123	0.00312961	0.148394	0.557564	0.840883
ENSMUSG00000023885.10	MGI:98738	Thbs2	thrombospondin 2	1.8771	2.05468e-12	5.09175e-11	0.953982	0.000547205	0.0263383
ENSMUSG00000023903.9	MGI:2443938	Mmp25	matrix metallopeptidase 25	2.004	2.31445e-07	1.78523e-06	0.643988	0.114073	0.4488
ENSMUSG00000023905.16	MGI:1351484	Tnfrsf12a	tumor necrosis factor receptor superfamily, member 12a	3.65144	1.2802e-14	5.2543e-13	0.812017	0.0965986	0.421554
ENSMUSG00000023908.9	MGI:2137630	Pkmyt1	protein kinase, membrane associated tyrosine/threonine 1	1.04219	5.39042e-07	3.79652e-06	0.524199	0.02094	0.209505
ENSMUSG00000023913.18	MGI:1351327	Pla2g7	phospholipase A2, group VII (platelet-activating factor acetylhydrolase, plasma)	0.631953	1.18473e-08	1.22388e-07	0.273451	0.0138199	0.17042
ENSMUSG00000023919.10	MGI:1933744	Cenpq	centromere protein Q	0.816526	4.97854e-05	0.000220362	0.0497287	0.814928	0.944596
ENSMUSG00000023940.15	MGI:1919665	Sgo1	shugoshin 1	3.0059	3.82947e-08	3.5122e-07	1.6067	0.0126619	0.161802
ENSMUSG00000023945.8	MGI:1927126	Slc5a7	solute carrier family 5 (choline transporter), member 7	1.6161	0.000100087	0.000411665	-0.272945	0.53551	0.828796
ENSMUSG00000023947.9	MGI:1194908	Nfkbie	nuclear factor of kappa light polypeptide gene enhancer in B cells inhibitor, epsilon	1.27064	7.93459e-06	4.22472e-05	0.2668	0.369888	0.725244
ENSMUSG00000023953.10	MGI:1891457	Polh	polymerase (DNA directed), eta (RAD 30 related)	1.05055	1.36786e-06	8.74244e-06	0.231742	0.298882	0.671699
ENSMUSG00000023963.11	MGI:1927096	Cyp39a1	cytochrome P450, family 39, subfamily a, polypeptide 1	2.41711	2.7241e-09	3.28342e-08	0.96506	0.0236598	0.221414
ENSMUSG00000023972.11	MGI:1918711	Ptk7	PTK7 protein tyrosine kinase 7	0.8455	2.34023e-06	1.40624e-05	0.295411	0.104745	0.434435
ENSMUSG00000023982.9	MGI:102770	Guca1a	guanylate cyclase activator 1a (retina)	4.31562	3.70082e-07	2.72178e-06	2.00229	0.0507196	0.315336
ENSMUSG00000023990.19	MGI:103270	Tfeb	transcription factor EB	1.68519	4.50786e-12	1.03343e-10	0.877069	0.000447557	0.0228908
ENSMUSG00000023992.15	MGI:1913150	Trem2	triggering receptor expressed on myeloid cells 2	4.0095	6.00546e-23	5.57365e-20	1.37474	0.000761515	0.0317242
ENSMUSG00000023994.14	MGI:97316	Nfya	nuclear transcription factor-Y alpha	1.21781	1.47799e-09	1.90516e-08	0.171037	0.399403	0.744627
ENSMUSG00000024011.18	MGI:1921366	Pi16	peptidase inhibitor 16	1.76975	0.000433849	0.00153874	0.447378	0.393229	0.740551
ENSMUSG00000024013.16	MGI:1347084	Fgd2	FYVE, RhoGEF and PH domain containing 2	2.81842	2.24667e-15	1.13601e-13	1.35807	0.000167919	0.0118826
ENSMUSG00000024014.9	MGI:97584	Pim1	proviral integration site 1	2.14294	7.43128e-10	1.03839e-08	0.570288	0.112479	0.446352
ENSMUSG00000024042.8	MGI:104754	Sik1	salt inducible kinase 1	1.55359	1.74477e-08	1.73219e-07	0.681921	0.0144713	0.175173
ENSMUSG00000024043.14	MGI:2147003	Arhgap28	Rho GTPase activating protein 28	2.59047	9.77786e-05	0.000403191	1.22551	0.0619823	0.345306
ENSMUSG00000024048.16	MGI:1914518	Myl12a	myosin, light chain 12A, regulatory, non-sarcomeric	0.838134	5.36952e-08	4.78804e-07	0.0514947	0.740559	0.918339
ENSMUSG00000024049.16	MGI:1341430	Myom1	myomesin 1	0.87168	0.00142017	0.00444756	0.222014	0.432156	0.768475
ENSMUSG00000024053.12	MGI:2389136	Emilin2	elastin microfibril interfacer 2	1.82155	2.21668e-05	0.000106738	0.620312	0.168044	0.532904
ENSMUSG00000024055.16	MGI:2158641	Cyp4f13	cytochrome P450, family 4, subfamily f, polypeptide 13	0.644081	0.000203241	0.000775729	0.0916947	0.603215	0.865631
ENSMUSG00000024056.11	MGI:1914302	Ndc80	NDC80 kinetochore complex component	4.07191	1.45079e-14	5.86246e-13	1.18488	0.0417455	0.289848
ENSMUSG00000024063.14	MGI:1925139	Lbh	limb-bud and heart	1.87456	4.34442e-17	3.86976e-15	0.340631	0.128945	0.474597
ENSMUSG00000024066.10	MGI:98973	Xdh	xanthine dehydrogenase	2.3995	1.42989e-07	1.1595e-06	-0.168958	0.714217	0.911283
ENSMUSG00000024070.16	MGI:1922542	Prkd3	protein kinase D3	1.18925	8.91796e-12	1.9205e-10	0.270002	0.125371	0.468281
ENSMUSG00000024085.14	MGI:104669	Man2a1	mannosidase 2, alpha 1	1.06676	5.49916e-05	0.000240926	0.0527279	0.842851	0.954501
ENSMUSG00000024087.5	MGI:88590	Cyp1b1	cytochrome P450, family 1, subfamily b, polypeptide 1	2.59028	1.01774e-10	1.73984e-09	0.0302733	0.940563	0.985091
ENSMUSG00000024098.7	MGI:2137520	Twsg1	twisted gastrulation BMP signaling modulator 1	0.625269	7.61273e-11	1.34785e-09	0.0812594	0.403353	0.747986
ENSMUSG00000024143.16	MGI:1931553	Rhoq	ras homolog family member Q	1.25798	1.63641e-13	5.21965e-12	0.239295	0.16408	0.527195
ENSMUSG00000024165.10	MGI:1196260	Jpt2	Jupiter microtubule associated homolog 2	2.29927	5.86134e-16	3.50596e-14	0.579406	0.0463768	0.303985
ENSMUSG00000024187.16	MGI:2146854	Fam234a	family with sequence similarity 234, member A	1.19831	8.37918e-10	1.15183e-08	0.391651	0.0481156	0.308832
ENSMUSG00000024190.8	MGI:105120	Dusp1	dual specificity phosphatase 1	1.75753	1.84534e-05	9.05086e-05	0.407474	0.325603	0.693031
ENSMUSG00000024194.17	MGI:1914925	Cuta	cutA divalent cation tolerance homolog	0.615824	1.36057e-05	6.87479e-05	0.137185	0.338748	0.704109
ENSMUSG00000024197.11	MGI:1914155	Plin3	perilipin 3	1.18248	5.79529e-09	6.48527e-08	0.441781	0.0332285	0.263077
ENSMUSG00000024205.8	MGI:3650081	Rpl36-ps2	ribosomal protein L36, pseudogene 2	0.76144	2.89876e-07	2.18783e-06	0.235611	0.135073	0.485
ENSMUSG00000024210.4	MGI:3045325	Ip6k3	inositol hexaphosphate kinase 3	2.45103	8.6775e-10	1.18773e-08	0.675042	0.162678	0.52522
ENSMUSG00000024211.16	MGI:1351345	Grm8	glutamate receptor, metabotropic 8	1.92411	9.33426e-06	4.88195e-05	0.367825	0.402172	0.746984
ENSMUSG00000024235.12	MGI:1346878	Map3k8	mitogen-activated protein kinase kinase kinase 8	1.67742	5.50402e-08	4.89812e-07	-0.0274352	0.931131	0.982167
ENSMUSG00000024236.19	MGI:2147319	Svil	supervillin	1.61611	3.95318e-08	3.6182e-07	0.104926	0.723529	0.914664
ENSMUSG00000024256.8	MGI:105094	Adcyap1	adenylate cyclase activating polypeptide 1	3.60808	3.44174e-05	0.000158537	1.01643	0.243438	0.621006
ENSMUSG00000024292.16	MGI:1927669	Cyp4f14	cytochrome P450, family 4, subfamily f, polypeptide 14	1.10117	9.56513e-09	1.00953e-07	0.137925	0.483889	0.802426
ENSMUSG00000024300.18	MGI:107711	Myo1f	myosin IF	3.73153	2.47307e-19	5.19363e-17	1.55891	0.000226381	0.0146178
ENSMUSG00000024301.11	MGI:2137414	Kifc5b	kinesin family member C5B	0.951336	4.29072e-05	0.000193129	-0.134429	0.578693	0.85283
ENSMUSG00000024308.16	MGI:1201689	Tapbp	TAP binding protein	2.51045	2.14538e-24	4.11499e-21	0.796971	0.00133999	0.0456902
ENSMUSG00000024330.18	MGI:88447	Col11a2	collagen, type XI, alpha 2	0.854326	7.0536e-06	3.79539e-05	0.670416	0.000461656	0.0233804
ENSMUSG00000024334.10	MGI:95924	H2-Oa	histocompatibility 2, O region alpha locus	2.53103	6.60367e-09	7.26228e-08	1.53709	0.0014978	0.0488975
ENSMUSG00000024339.13	MGI:98484	Tap2	transporter 2, ATP-binding cassette, sub-family B (MDR/TAP)	1.89901	6.53785e-17	5.47502e-15	0.542822	0.0195866	0.203884
ENSMUSG00000024347.17	MGI:1921252	Psd2	pleckstrin and Sec7 domain containing 2	0.623857	9.77764e-08	8.20871e-07	0.39287	0.000852266	0.0341096
ENSMUSG00000024349.11	MGI:1919762	Sting1	stimulator of interferon response cGAMP interactor 1	2.64939	7.7249e-15	3.38285e-13	0.827782	0.0170585	0.189447
ENSMUSG00000024357.11	MGI:1932040	Sil1	endoplasmic reticulum chaperone SIL1 homolog (S. cerevisiae)	0.82825	2.0695e-12	5.12405e-11	0.0659861	0.585708	0.857573
ENSMUSG00000024369.17	MGI:102744	Nelfe	negative elongation factor complex member E, Rdbp	0.647717	3.72877e-09	4.36632e-08	0.0537836	0.634685	0.879475
ENSMUSG00000024371.15	MGI:88226	C2	complement component 2 (within H-2S)	3.24485	3.89715e-08	3.57086e-07	1.83998	0.00341733	0.0791617
ENSMUSG00000024395.10	MGI:2385067	Lims2	LIM and senescent cell antigen like domains 2	1.17039	8.62156e-07	5.79423e-06	-0.125425	0.603547	0.865807
ENSMUSG00000024397.15	MGI:1343098	Aif1	allograft inflammatory factor 1	3.58628	7.79914e-20	1.96832e-17	1.09518	0.00594257	0.106682
ENSMUSG00000024401.15	MGI:104798	Tnf	tumor necrosis factor	4.15833	2.6855e-05	0.000126435	0.72899	0.595456	0.862054
ENSMUSG00000024409.9	MGI:1930025	Psors1c2	psoriasis susceptibility 1 candidate 2 (human)	4.52968	0.000159433	0.000623496	1.04508	0.442798
ENSMUSG00000024411.12	MGI:107387	Aqp4	aquaporin 4	1.90681	1.7989e-16	1.28428e-14	0.52004	0.0248552	0.226747
ENSMUSG00000024413.15	MGI:1097712	Npc1	NPC intracellular cholesterol transporter 1	0.990358	2.12018e-10	3.38323e-09	0.138431	0.377025	0.730291
ENSMUSG00000024420.10	MGI:95459	Zfp521	zinc finger protein 521	1.22874	3.75359e-16	2.38532e-14	0.512024	0.00100992	0.0376679
ENSMUSG00000024427.8	MGI:1345144	Spry4	sprouty RTK signaling antagonist 4	1.26699	2.9662e-06	1.73633e-05	0.0673627	0.8055	0.941405
ENSMUSG00000024437.7	MGI:3647532	Gm8615	predicted pseudogene 8615	1.20532	1.57895e-05	7.86089e-05	0.663863	0.0402541	0.284338
ENSMUSG00000024451.10	MGI:2147274	Arap3	ArfGAP with RhoGAP domain, ankyrin repeat and PH domain 3	1.27179	2.44515e-09	2.98258e-08	0.143385	0.505403	0.813203
ENSMUSG00000024457.17	MGI:1337056	Trim26	tripartite motif-containing 26	0.862876	1.3986e-09	1.81176e-08	0.221101	0.126306	0.46982
ENSMUSG00000024486.7	MGI:96070	Hbegf	heparin-binding EGF-like growth factor	3.01397	1.28513e-14	5.26701e-13	-0.113521	0.772992	0.929858
ENSMUSG00000024501.21	MGI:1349762	Dpysl3	dihydropyrimidinase-like 3	0.743996	0.000138966	0.000552541	0.59931	0.00216274	0.060636
ENSMUSG00000024507.7	MGI:105089	Hsd17b4	hydroxysteroid (17-beta) dehydrogenase 4	0.773986	3.58934e-11	6.84353e-10	0.100713	0.393966	0.740551
ENSMUSG00000024521.9	MGI:1930146	Pmaip1	phorbol-12-myristate-13-acetate-induced protein 1	1.98347	6.04768e-06	3.30355e-05	-0.046549	0.919245	0.978687
ENSMUSG00000024529.15	MGI:96817	Lox	lysyl oxidase	4.35842	2.57428e-09	3.12377e-08	1.05946	0.161306	0.523244
ENSMUSG00000024534.16	MGI:1915097	Sncaip	synuclein, alpha interacting protein (synphilin)	0.956388	1.92266e-07	1.51097e-06	0.262685	0.164364	0.527563
ENSMUSG00000024538.9	MGI:97751	Ppic	peptidylprolyl isomerase C	1.58773	1.05082e-07	8.77342e-07	-0.243124	0.428832	0.766359
ENSMUSG00000024542.10	MGI:1918049	Cep192	centrosomal protein 192	0.856049	1.14717e-07	9.49248e-07	0.184646	0.258208	0.635402
ENSMUSG00000024565.11	MGI:109295	Sall3	spalt like transcription factor 3	1.82782	1.00819e-12	2.68083e-11	0.411395	0.120523	0.460233
ENSMUSG00000024590.9	MGI:96795	Lmnb1	lamin B1	1.5716	7.04844e-14	2.44032e-12	0.503883	0.0185294	0.198175
ENSMUSG00000024593.16	MGI:2685177	Megf10	multiple EGF-like-domains 10	0.827696	2.05006e-09	2.54563e-08	0.00617852	0.964762	0.990967
ENSMUSG00000024594.10	MGI:1916106	Prrc1	proline-rich coiled-coil 1	0.68448	9.95117e-09	1.04682e-07	0.22816	0.060125	0.340001
ENSMUSG00000024597.12	MGI:101924	Slc12a2	solute carrier family 12, member 2	0.883427	3.3419e-07	2.48257e-06	0.361409	0.037708	0.277269
ENSMUSG00000024600.9	MGI:3036230	Slc27a6	solute carrier family 27 (fatty acid transporter), member 6	1.92589	0.000548383	0.00189976	0.127891	0.850776	0.956414
ENSMUSG00000024613.17	MGI:892003	Tcof1	treacle ribosome biogenesis factor 1	0.628347	2.43184e-05	0.000115899	0.228443	0.132038	0.479152
ENSMUSG00000024620.12	MGI:97531	Pdgfrb	platelet derived growth factor receptor, beta polypeptide	1.04897	1.19226e-08	1.23019e-07	0.237406	0.200167	0.573494
ENSMUSG00000024621.17	MGI:1339758	Csf1r	colony stimulating factor 1 receptor	2.66835	9.42354e-20	2.29767e-17	0.909639	0.00195239	0.0572623
ENSMUSG00000024640.10	MGI:2183441	Psat1	phosphoserine aminotransferase 1	0.884289	7.82804e-13	2.12472e-11	0.112617	0.363971	0.722088
ENSMUSG00000024644.18	MGI:1913304	Cndp2	CNDP dipeptidase 2 (metallopeptidase M20 family)	0.969221	8.80998e-09	9.41225e-08	0.0675255	0.69044	0.902303
ENSMUSG00000024659.16	MGI:96819	Anxa1	annexin A1	2.41941	6.63469e-05	0.000284948	-0.193881	0.779661	0.932335
ENSMUSG00000024660.10	MGI:1313288	Incenp	inner centromere protein	1.17656	9.21205e-10	1.25019e-08	0.143339	0.463977	0.788838
ENSMUSG00000024663.21	MGI:1922010	Rab3il1	RAB3A interacting protein (rabin3)-like 1	2.31462	2.27457e-14	8.74889e-13	0.373868	0.221082	0.597779
ENSMUSG00000024669.9	MGI:88340	Cd5	CD5 antigen	4.31492	4.33133e-07	3.13028e-06	0.316866	0.741772	0.919119
ENSMUSG00000024670.18	MGI:103566	Cd6	CD6 antigen	3.3681	1.8918e-07	1.48957e-06	0.382636	0.593822	0.861379
ENSMUSG00000024672.12	MGI:1918846	Ms4a7	membrane-spanning 4-domains, subfamily A, member 7	5.78462	5.37052e-13	1.51872e-11	0.00644946	0.993916	0.998682
ENSMUSG00000024675.20	MGI:1927656	Ms4a4c	membrane-spanning 4-domains, subfamily A, member 4C	4.44196	1.12013e-11	2.37315e-10	0.837674	0.24817	0.625859
ENSMUSG00000024677.14	MGI:1917024	Ms4a6b	membrane-spanning 4-domains, subfamily A, member 6B	3.94593	2.94686e-20	8.96011e-18	0.387761	0.379729	0.731734
ENSMUSG00000024679.11	MGI:1916024	Ms4a6d	membrane-spanning 4-domains, subfamily A, member 6D	4.22824	1.04428e-14	4.4119e-13	0.778666	0.172249	0.538347
ENSMUSG00000024691.14	MGI:1915508	Fam111a	family with sequence similarity 111, member A	3.47427	2.62635e-15	1.30281e-13	1.49238	0.00101206	0.0376796
ENSMUSG00000024696.10	MGI:2147677	Lpxn	leupaxin	2.97446	3.63317e-13	1.06991e-11	0.524927	0.216274	0.592688
ENSMUSG00000024697.5	MGI:95769	Gna14	guanine nucleotide binding protein, alpha 14	2.74227	7.64166e-07	5.19882e-06	0.469965	0.433853	0.769196
ENSMUSG00000024725.14	MGI:700012	Ostf1	osteoclast stimulating factor 1	1.4256	1.43773e-10	2.38552e-09	0.272999	0.224341	0.601276
ENSMUSG00000024727.10	MGI:2675603	Trpm6	transient receptor potential cation channel, subfamily M, member 6	1.99155	2.50481e-05	0.000118901	-0.0334766	0.941421	0.98524
ENSMUSG00000024732.8	MGI:1277220	Ccdc86	coiled-coil domain containing 86	1.14121	3.56899e-10	5.40723e-09	0.294787	0.114541	0.44926
ENSMUSG00000024737.3	MGI:1929691	Slc15a3	solute carrier family 15, member 3	4.50019	1.86599e-19	4.16174e-17	0.988731	0.0521283	0.320866
ENSMUSG00000024747.4	MGI:1347050	Aldh1a7	aldehyde dehydrogenase family 1, subfamily A7	1.77143	4.14356e-06	2.3482e-05	-0.322575	0.442207	0.774845
ENSMUSG00000024766.16	MGI:2147592	Lipo3	lipase, member O3	0.692687	2.65605e-05	0.000125233	0.0731032	0.667615	0.893569
ENSMUSG00000024769.8	MGI:2652845	Cdc42bpg	CDC42 binding protein kinase gamma (DMPK-like)	0.804032	1.59873e-08	1.60042e-07	0.440473	0.00288617	0.0711658
ENSMUSG00000024778.14	MGI:95484	Fas	Fas (TNF receptor superfamily member 6)	2.32997	7.19275e-09	7.8121e-08	0.470478	0.267351	0.644032
ENSMUSG00000024781.17	MGI:96789	Lipa	lysosomal acid lipase A	2.14742	9.98178e-13	2.66406e-11	0.314942	0.298165	0.671496
ENSMUSG00000024782.8	MGI:1860835	Ak3	adenylate kinase 3	0.632348	4.16059e-07	3.01902e-06	-0.0362237	0.773114	0.929858
ENSMUSG00000024791.11	MGI:1915099	Cdca5	cell division cycle associated 5	3.86247	8.89719e-11	1.54205e-09	0.555597	0.39763	0.743618
ENSMUSG00000024795.12	MGI:2444576	Kif20b	kinesin family member 20B	3.12826	5.7773e-14	2.04703e-12	0.881596	0.0409244	0.286393
ENSMUSG00000024805.17	MGI:1923505	Pcgf5	polycomb group ring finger 5	0.691164	4.22529e-05	0.000190632	-0.175577	0.305362	0.676281
ENSMUSG00000024810.17	MGI:1924375	Il33	interleukin 33	1.55629	2.23906e-08	2.16684e-07	0.476653	0.0883612	0.404936
ENSMUSG00000024812.12	MGI:1341872	Tjp2	tight junction protein 2	1.03057	1.37266e-11	2.86596e-10	0.494433	0.00135579	0.0459259
ENSMUSG00000024816.13	MGI:1914707	Frmd8	FERM domain containing 8	1.89307	1.84852e-14	7.25563e-13	0.721121	0.00396366	0.0851363
ENSMUSG00000024818.16	MGI:2147731	Slc25a45	solute carrier family 25, member 45	2.66456	1.78846e-18	2.6661e-16	0.812854	0.00902246	0.134705
ENSMUSG00000024833.16	MGI:99690	Pola2	polymerase (DNA directed), alpha 2	0.729172	1.18481e-06	7.68966e-06	0.325131	0.0385261	0.279812
ENSMUSG00000024835.16	MGI:1345963	Coro1b	coronin, actin binding protein 1B	0.819364	5.14553e-10	7.48064e-09	0.104937	0.429018	0.766519
ENSMUSG00000024845.20	MGI:1914240	Tmem134	transmembrane protein 134	0.616584	1.75958e-09	2.22038e-08	0.0642153	0.542734	0.833173
ENSMUSG00000024854.5	MGI:1916995	Pold4	polymerase (DNA-directed), delta 4	1.60784	1.1095e-12	2.90987e-11	0.583346	0.011509	0.153673
ENSMUSG00000024856.11	MGI:1098779	Cdk2ap2	CDK2-associated protein 2	0.694378	1.50389e-05	7.52365e-05	0.19146	0.242653	0.620435
ENSMUSG00000024866.11	MGI:1918920	Acy3	aspartoacylase (aminoacylase) 3	1.17978	0.000865987	0.00286449	-0.638369	0.0938191	0.416005
ENSMUSG00000024875.6	MGI:1915340	Yif1a	Yip1 interacting factor homolog A (S. cerevisiae)	1.07002	8.68721e-11	1.51204e-09	0.133811	0.430241	0.767179
ENSMUSG00000024885.10	MGI:1914939	Aldh3b1	aldehyde dehydrogenase 3 family, member B1	2.11128	5.05955e-13	1.44413e-11	0.64638	0.0321498	0.259395
ENSMUSG00000024887.11	MGI:1859310	Asah2	N-acylsphingosine amidohydrolase 2	0.981031	7.17906e-07	4.91549e-06	0.439508	0.0284774	0.244252
ENSMUSG00000024899.8	MGI:1330223	Papss2	3'-phosphoadenosine 5'-phosphosulfate synthase 2	1.08097	1.72915e-09	2.18968e-08	0.309629	0.0872127	0.403059
ENSMUSG00000024900.6	MGI:1098296	Cpt1a	carnitine palmitoyltransferase 1a, liver	1.55864	1.76923e-16	1.26939e-14	0.232714	0.222053	0.598679
ENSMUSG00000024905.16	MGI:1340029	Tesmin	testis expressed metallothionein like	3.53779	1.64548e-05	8.15681e-05	0.510436	0.404318
ENSMUSG00000024907.8	MGI:95637	Gal	galanin and GMAP prepropeptide	3.80388	4.65113e-08	4.19886e-07	1.79841	0.00406486	0.0857063
ENSMUSG00000024909.16	MGI:1891209	Efemp2	epidermal growth factor-containing fibulin-like extracellular matrix protein 2	2.42923	2.14167e-19	4.57434e-17	0.91018	0.000912078	0.0354253
ENSMUSG00000024910.6	MGI:1338045	Ctsw	cathepsin W	2.46351	0.00015305	0.000601146	1.21821	0.13119	0.478141
ENSMUSG00000024912.7	MGI:107179	Fosl1	fos-like antigen 1	6.72293	3.14112e-07	2.35041e-06	2.89707	0.0429452	0.293639
ENSMUSG00000024913.17	MGI:1278315	Lrp5	low density lipoprotein receptor-related protein 5	2.11986	9.76331e-17	7.80278e-15	0.444087	0.0852107	0.399115
ENSMUSG00000024927.9	MGI:103290	Rela	v-rel reticuloendotheliosis viral oncogene homolog A (avian)	1.25106	5.5108e-11	1.00412e-09	0.319934	0.0981304	0.424732
ENSMUSG00000024937.16	MGI:3612340	Ehbp1l1	EH domain binding protein 1-like 1	1.25645	3.5926e-11	6.84521e-10	0.414577	0.0309208	0.253841
ENSMUSG00000024939.7	MGI:106595	Fam89b	family with sequence similarity 89, member B	0.783362	5.41079e-11	9.88406e-10	0.364183	0.00303082	0.0738513
ENSMUSG00000024960.10	MGI:104778	Plcb3	phospholipase C, beta 3	1.2361	8.95147e-14	3.01926e-12	0.269663	0.109208	0.441427
ENSMUSG00000024965.10	MGI:2147790	Fermt3	fermitin family member 3	3.49347	1.56455e-19	3.57252e-17	1.0664	0.00652774	0.112309
ENSMUSG00000024978.12	MGI:109162	Gpam	glycerol-3-phosphate acyltransferase, mitochondrial	1.33142	5.74056e-26	2.85907e-22	0.392806	0.00198178	0.0578383
ENSMUSG00000024985.21	MGI:1202879	Tcf7l2	transcription factor 7 like 2, T cell specific, HMG box	1.42169	1.01511e-07	8.49991e-07	0.729065	0.00805902	0.12702
ENSMUSG00000024986.13	MGI:96086	Hhex	hematopoietically expressed homeobox	2.52059	6.48264e-14	2.27282e-12	0.498732	0.153865	0.513704
ENSMUSG00000024989.16	MGI:1921357	Cep55	centrosomal protein 55	3.90594	2.24639e-11	4.47582e-10	1.14786	0.0720609	0.37095
ENSMUSG00000024998.18	MGI:1921305	Plce1	phospholipase C, epsilon 1	2.66317	1.92501e-16	1.35688e-14	0.766271	0.0186636	0.198889
ENSMUSG00000025001.12	MGI:106209	Hells	helicase, lymphoid specific	0.951097	5.26034e-06	2.91104e-05	0.234951	0.270664	0.646633
ENSMUSG00000025007.14	MGI:1888908	Aldh18a1	aldehyde dehydrogenase 18 family, member A1	0.913191	6.96816e-10	9.79867e-09	0.282978	0.0590889	0.337437
ENSMUSG00000025017.11	MGI:1933177	Pik3ap1	phosphoinositide-3-kinase adaptor protein 1	4.17194	1.71999e-18	2.59088e-16	1.31937	0.00599602	0.107176
ENSMUSG00000025026.16	MGI:1351615	Add3	adducin 3 (gamma)	0.623994	7.89034e-10	1.09404e-08	0.024292	0.811597	0.943763
ENSMUSG00000025044.17	MGI:98257	Msr1	macrophage scavenger receptor 1	6.88908	4.05353e-15	1.90874e-13	0.731567	0.43253	0.768739
ENSMUSG00000025058.5	MGI:1918648	Tasl	TLR adaptor interacting with endolysosomal SLC15A4	4.07001	4.46786e-14	1.60882e-12	0.746535	0.185744	0.557285
ENSMUSG00000025076.13	MGI:109383	Casp7	caspase 7	2.43807	7.01322e-14	2.43105e-12	0.433902	0.193673	0.566301
ENSMUSG00000025083.19	MGI:2147658	Afap1l2	actin filament associated protein 1-like 2	1.37794	3.62519e-07	2.67232e-06	-0.324273	0.236269	0.614168
ENSMUSG00000025089.16	MGI:1100842	Gfra1	glial cell line derived neurotrophic factor family receptor alpha 1	1.85704	6.97512e-07	4.79296e-06	0.218051	0.560326	0.842222
ENSMUSG00000025130.12	MGI:97464	P4hb	prolyl 4-hydroxylase, beta polypeptide	1.16345	3.19077e-12	7.59318e-11	0.189255	0.258336	0.635477
ENSMUSG00000025132.14	MGI:2178103	Arhgdia	Rho GDP dissociation inhibitor (GDI) alpha	0.821495	1.10913e-10	1.88487e-09	0.164393	0.197609	0.570598
ENSMUSG00000025140.16	MGI:2384795	Pycr1	pyrroline-5-carboxylate reductase 1	1.54869	2.34066e-07	1.80255e-06	0.106192	0.74055	0.918339
ENSMUSG00000025144.18	MGI:894324	Cenpx	centromere protein X	1.11414	3.45961e-11	6.63575e-10	0.142241	0.416751	0.756963
ENSMUSG00000025150.11	MGI:107200	Cbr2	carbonyl reductase 2	1.68874	0.000515481	0.00179747	-0.129673	0.804691	0.941249
ENSMUSG00000025154.16	MGI:1918335	Arhgap19	Rho GTPase activating protein 19	2.72154	1.60358e-15	8.55966e-14	0.306883	0.380301	0.731734
ENSMUSG00000025161.17	MGI:1933438	Slc16a3	solute carrier family 16 (monocarboxylic acid transporters), member 3	2.98708	8.91339e-11	1.5439e-09	0.950626	0.0466452	0.304631
ENSMUSG00000025169.7	MGI:1913429	Ogfod3	2-oxoglutarate and iron-dependent oxygenase domain containing 3	1.17129	7.58392e-10	1.05818e-08	0.141305	0.482529	0.801587
ENSMUSG00000025171.3	MGI:2385092	Ubtd1	ubiquitin domain containing 1	0.809966	1.61535e-05	8.02544e-05	0.467956	0.0146161	0.175895
ENSMUSG00000025185.15	MGI:1914823	Loxl4	lysyl oxidase-like 4	4.78785	0.000262199	0.000976914	0.201949	0.857852
ENSMUSG00000025225.16	MGI:1099800	Nfkb2	nuclear factor of kappa light polypeptide gene enhancer in B cells 2, p49/p100	3.06957	1.0375e-19	2.5084e-17	0.598911	0.0871388	0.402987
ENSMUSG00000025232.9	MGI:96073	Hexa	hexosaminidase A	2.939	6.13123e-19	1.09566e-16	0.577193	0.0814384	0.392893
ENSMUSG00000025239.4	MGI:1352502	Limd1	LIM domains containing 1	1.30421	1.48881e-11	3.08162e-10	0.336723	0.0867521	0.402099
ENSMUSG00000025257.6	MGI:1913861	Ribc1	RIB43A domain with coiled-coils 1	1.82692	0.00124369	0.00395208	0.443981	0.480248
ENSMUSG00000025279.8	MGI:1314633	Dnase1l3	deoxyribonuclease 1-like 3	2.77481	0.000580266	0.00199747	-0.0312237	0.96957
ENSMUSG00000025283.16	MGI:98233	Sat1	spermidine/spermine N1-acetyl transferase 1	1.85032	1.5924e-14	6.34556e-13	0.440175	0.0689923	0.3633
ENSMUSG00000025289.16	MGI:1859815	Prdx4	peroxiredoxin 4	1.80619	8.26379e-12	1.79847e-10	0.19226	0.475033	0.796305
ENSMUSG00000025321.15	MGI:1338035	Itgb8	integrin beta 8	0.588045	2.24757e-08	2.17288e-07	0.00639909	0.951701	0.988042
ENSMUSG00000025324.9	MGI:1330809	Atp10a	ATPase, class V, type 10A	0.668847	0.00298712	0.00860283	0.0956286	0.674446	0.896233
ENSMUSG00000025330.7	MGI:1338898	Padi4	peptidyl arginine deiminase, type IV	5.19229	0.00102406	0.00332093	1.70357	0.291741
ENSMUSG00000025351.15	MGI:99529	Cd63	CD63 antigen	2.67702	4.26161e-19	7.94699e-17	0.559494	0.0627811	0.347601
ENSMUSG00000025353.6	MGI:1914094	Ormdl2	ORM1-like 2 (S. cerevisiae)	1.57561	1.73222e-10	2.82367e-09	0.228842	0.366529	0.723775
ENSMUSG00000025355.8	MGI:1927899	Mmp19	matrix metallopeptidase 19	2.46505	1.42402e-09	1.84302e-08	1.23498	0.00304872	0.0739495
ENSMUSG00000025358.17	MGI:104772	Cdk2	cyclin-dependent kinase 2	2.36955	4.69031e-14	1.68681e-12	0.62152	0.0558041	0.328945
ENSMUSG00000025359.11	MGI:98301	Pmel	premelanosome protein	2.61099	4.07489e-07	2.96833e-06	1.45667	0.0181819	0.196677
ENSMUSG00000025362.7	MGI:1351628	Rps26	ribosomal protein S26	0.630065	7.36775e-08	6.37335e-07	0.165407	0.160662	0.522391
ENSMUSG00000025366.9	MGI:1344426	Esyt1	extended synaptotagmin-like protein 1	2.07554	1.56823e-09	2.00977e-08	0.26285	0.44968	0.780032
ENSMUSG00000025403.6	MGI:1277989	Shmt2	serine hydroxymethyltransferase 2 (mitochondrial)	0.652429	2.325e-11	4.61658e-10	0.263413	0.00865947	0.132247
ENSMUSG00000025432.12	MGI:1333798	Avil	advillin	2.13704	5.831e-06	3.19489e-05	1.1153	0.0288815	0.245993
ENSMUSG00000025464.16	MGI:1916983	Paox	polyamine oxidase (exo-N4-amino)	0.829911	8.92143e-07	5.97482e-06	0.060504	0.724932	0.914908
ENSMUSG00000025491.15	MGI:1915963	Ifitm1	interferon induced transmembrane protein 1	1.73671	2.80409e-05	0.000131524	0.466532	0.280285	0.655233
ENSMUSG00000025494.9	MGI:1344402	Sigirr	single immunoglobulin and toll-interleukin 1 receptor (TIR) domain	1.45685	1.88634e-07	1.4869e-06	-0.145884	0.613943	0.869672
ENSMUSG00000025496.6	MGI:94926	Drd4	dopamine receptor D4	2.45948	0.000367427	0.00132339	1.51613	0.0320558	0.259041
ENSMUSG00000025503.6	MGI:1274789	Taldo1	transaldolase 1	0.658663	1.5057e-08	1.51842e-07	0.13236	0.258104	0.635375
ENSMUSG00000025507.14	MGI:1889507	Pidd1	p53 induced death domain protein 1	1.51515	5.27749e-08	4.71402e-07	0.389035	0.185923	0.557338
ENSMUSG00000025508.14	MGI:1914436	Rplp2	ribosomal protein, large P2	0.764308	9.38884e-08	7.93089e-07	0.245385	0.087826	0.404247
ENSMUSG00000025509.16	MGI:1914103	Pnpla2	patatin-like phospholipase domain containing 2	1.04299	3.8055e-10	5.73836e-09	0.383004	0.0242268	0.223982
ENSMUSG00000025510.15	MGI:1096360	Cd151	CD151 antigen	1.96444	2.61134e-14	9.86696e-13	0.424742	0.101992	0.429922
ENSMUSG00000025511.16	MGI:1928097	Tspan4	tetraspanin 4	2.19414	7.24663e-14	2.50592e-12	0.731513	0.0138129	0.17042
ENSMUSG00000025525.13	MGI:1915367	Apool	apolipoprotein O-like	1.04757	1.44835e-08	1.46588e-07	0.00776071	0.967832	0.992011
ENSMUSG00000025534.18	MGI:95872	Gusb	glucuronidase, beta	3.89939	2.6012e-21	1.20791e-18	0.637761	0.123178	0.465538
ENSMUSG00000025538.16	MGI:1915152	Sumf2	sulfatase modifying factor 2	0.944532	8.54555e-13	2.30766e-11	0.278359	0.0384489	0.279751
ENSMUSG00000025555.15	MGI:2446173	Farp1	FERM, RhoGEF (Arhgef) and pleckstrin domain protein 1 (chondrocyte-derived)	0.646999	5.18322e-07	3.66584e-06	0.215909	0.0958789	0.420536
ENSMUSG00000025557.11	MGI:1861376	Slc15a1	solute carrier family 15 (oligopeptide transporter), member 1	4.05782	0.000638321	0.00218009	0.530541	0.733116
ENSMUSG00000025574.14	MGI:98763	Tk1	thymidine kinase 1	5.22877	4.57137e-20	1.27692e-17	1.69025	0.0030804	0.074098
ENSMUSG00000025608.10	MGI:1351317	Podxl	podocalyxin-like	0.688511	0.000611933	0.00209719	0.0329205	0.870279	0.963438
ENSMUSG00000025610.8	MGI:2446584	Map3k7cl	Map3k7 C-terminal like	1.69919	0.00037936	0.00136194	-0.293072	0.566072	0.845744
ENSMUSG00000025612.6	MGI:894680	Bach1	BTB and CNC homology 1, basic leucine zipper transcription factor 1	1.35062	6.2631e-14	2.20288e-12	0.481754	0.00840269	0.130349
ENSMUSG00000025647.17	MGI:1915044	Shisa5	shisa family member 5	1.98772	3.11777e-20	9.34388e-18	0.497204	0.0218714	0.213514
ENSMUSG00000025648.19	MGI:2687284	Pfkfb4	6-phosphofructo-2-kinase/fructose-2,6-biphosphatase 4	1.19763	3.42389e-09	4.04387e-08	0.502858	0.0144349	0.17504
ENSMUSG00000025650.14	MGI:88462	Col7a1	collagen, type VII, alpha 1	1.02126	0.00079658	0.0026529	0.429548	0.163021	0.52548
ENSMUSG00000025701.13	MGI:87999	Alox5	arachidonate 5-lipoxygenase	3.0248	5.67609e-10	8.14904e-09	0.647713	0.199146	0.572532
ENSMUSG00000025702.16	MGI:1919029	Marchf8	membrane associated ring-CH-type finger 8	0.657245	1.50889e-06	9.54324e-06	0.331051	0.0159419	0.183209
ENSMUSG00000025743.15	MGI:1349163	Sdc3	syndecan 3	1.53485	2.33433e-16	1.59896e-14	0.17064	0.362383	0.721173
ENSMUSG00000025745.13	MGI:2135593	Hadha	hydroxyacyl-CoA dehydrogenase trifunctional multienzyme complex subunit alpha	0.993587	2.31987e-16	1.59296e-14	0.140007	0.250814	0.628361
ENSMUSG00000025747.13	MGI:98878	Tyms	thymidylate synthase	1.17705	2.97782e-08	2.79709e-07	-0.275367	0.208701	0.582992
ENSMUSG00000025758.11	MGI:101783	Plk4	polo like kinase 4	1.02408	2.0663e-05	0.000100168	0.321795	0.197269	0.570473
ENSMUSG00000025779.11	MGI:1341909	Ly96	lymphocyte antigen 96	1.22549	4.10139e-07	2.98434e-06	0.603703	0.0230119	0.218385
ENSMUSG00000025780.8	MGI:1925751	Itih5	inter-alpha (globulin) inhibitor H5	1.44669	2.25935e-09	2.7815e-08	0.186928	0.44142	0.774306
ENSMUSG00000025792.10	MGI:1353497	Slc25a10	solute carrier family 25 (mitochondrial carrier, dicarboxylate transporter), member 10	1.1111	7.22787e-12	1.58985e-10	0.281321	0.0886875	0.405506
ENSMUSG00000025795.9	MGI:2179722	Rassf3	Ras association (RalGDS/AF-6) domain family member 3	0.886158	0.000975184	0.00318035	0.0252319	0.925753	0.980912
ENSMUSG00000025804.6	MGI:104618	Ccr1	chemokine (C-C motif) receptor 1	2.21322	0.0004526	0.00159835	1.47243	0.046845	0.305022
ENSMUSG00000025809.16	MGI:96610	Itgb1	integrin beta 1 (fibronectin receptor beta)	1.79549	1.37519e-13	4.45558e-12	0.258432	0.288451	0.663061
ENSMUSG00000025823.10	MGI:104864	Pdia4	protein disulfide isomerase associated 4	1.59441	5.05304e-10	7.36106e-09	0.0925671	0.719418	0.91367
ENSMUSG00000025854.16	MGI:2136853	Fam20c	FAM20C, golgi associated secretory pathway kinase	0.686312	2.33728e-05	0.000111965	0.234637	0.152458	0.510822
ENSMUSG00000025857.11	MGI:3616079	Dnaaf5	dynein, axonemal assembly factor 5	0.7165	1.64842e-06	1.03371e-05	0.309954	0.0473788	0.306413
ENSMUSG00000025877.15	MGI:2670962	Hk3	hexokinase 3	3.18148	3.66506e-12	8.54518e-11	0.948944	0.0449672	0.299728
ENSMUSG00000025880.12	MGI:1100518	Smad7	SMAD family member 7	1.50544	6.79874e-09	7.44884e-08	0.212395	0.418228	0.758376
ENSMUSG00000025887.11	MGI:1312922	Casp12	caspase 12	2.56687	2.81766e-07	2.13334e-06	0.735835	0.16357	0.526457
ENSMUSG00000025888.7	MGI:96544	Casp1	caspase 1	3.37268	7.78244e-14	2.66241e-12	1.21108	0.00947377	0.13854
ENSMUSG00000025912.17	MGI:99925	Mybl1	myeloblastosis oncogene-like 1	1.26838	8.2756e-05	0.000347638	-0.315515	0.350563	0.713921
ENSMUSG00000025915.15	MGI:2182368	Sgk3	serum/glucocorticoid regulated kinase 3	1.04065	1.35257e-07	1.10554e-06	0.137437	0.496415	0.809219
ENSMUSG00000025922.10	MGI:3647181	Rpl7-ps8	ribosomal protein L7, pseudogene 8	0.594812	0.000965002	0.00315107	-0.147643	0.438718	0.772572
ENSMUSG00000025935.11	MGI:1919515	Tram1	translocating chain-associating membrane protein 1	0.869614	5.66152e-09	6.35535e-08	0.0375474	0.803487	0.940649
ENSMUSG00000025950.17	MGI:96413	Idh1	isocitrate dehydrogenase 1 (NADP+), soluble	0.973839	1.62584e-09	2.07713e-08	0.433762	0.00743912	0.120407
ENSMUSG00000025981.14	MGI:1915126	Coq10b	coenzyme Q10B	0.60927	0.000250621	0.000937419	-0.0196657	0.907406	0.975496
ENSMUSG00000025993.11	MGI:1315204	Slc40a1	solute carrier family 40 (iron-regulated transporter), member 1	1.03426	4.35461e-08	3.95101e-07	0.213678	0.263887	0.640664
ENSMUSG00000025997.14	MGI:1342541	Ikzf2	IKAROS family zinc finger 2	0.788001	0.00034992	0.001267	0.328319	0.14451	0.497845
ENSMUSG00000026003.6	MGI:87866	Acadl	acyl-Coenzyme A dehydrogenase, long-chain	0.847996	1.31819e-08	1.34488e-07	-0.0215999	0.886159	0.968591
ENSMUSG00000026012.3	MGI:88327	Cd28	CD28 antigen	5.1419	5.91707e-09	6.60357e-08	-0.632256	0.483915	0.802426
ENSMUSG00000026029.15	MGI:1261423	Casp8	caspase 8	2.90238	1.40998e-19	3.29809e-17	0.764094	0.0205361	0.207784
ENSMUSG00000026031.16	MGI:1336166	Cflar	CASP8 and FADD-like apoptosis regulator	1.28202	5.45289e-12	1.22951e-10	0.389301	0.0376734	0.277269
ENSMUSG00000026039.10	MGI:1098767	Sgo2a	shugoshin 2A	2.57407	1.44558e-10	2.39716e-09	0.126764	0.759875	0.924476
ENSMUSG00000026042.17	MGI:88458	Col5a2	collagen, type V, alpha 2	2.18876	7.83449e-07	5.31488e-06	1.32234	0.00294919	0.0722458
ENSMUSG00000026043.19	MGI:88453	Col3a1	collagen, type III, alpha 1	5.03583	1.17845e-11	2.48755e-10	1.84249	0.0138938	0.170885
ENSMUSG00000026051.9	MGI:1926146	Ecrg4	ECRG4 augurin precursor	4.53671	1.41155e-11	2.94074e-10	2.33733	0.000853442	0.0341096
ENSMUSG00000026068.12	MGI:1338888	Il18rap	interleukin 18 receptor accessory protein	3.1348	2.95915e-05	0.000138099	2.22115	0.0214745	0.212048
ENSMUSG00000026069.16	MGI:98427	Il1rl1	interleukin 1 receptor-like 1	1.67572	0.000558739	0.00193099	0.871777	0.101086	0.429094
ENSMUSG00000026073.14	MGI:96546	Il1r2	interleukin 1 receptor, type II	2.44169	6.59449e-07	4.55097e-06	1.23825	0.0243221	0.224108
ENSMUSG00000026074.16	MGI:1349394	Map4k4	mitogen-activated protein kinase kinase kinase kinase 4	0.643939	9.24686e-07	6.16607e-06	0.256083	0.0516246	0.319282
ENSMUSG00000026088.16	MGI:1916278	Mitd1	MIT, microtubule interacting and transport, domain containing 1	0.851647	6.73455e-10	9.50269e-09	0.20937	0.145954	0.499811
ENSMUSG00000026094.15	MGI:2138162	Stk17b	serine/threonine kinase 17b (apoptosis-inducing)	1.4292	1.13552e-09	1.50692e-08	0.195237	0.417626	0.757784
ENSMUSG00000026095.16	MGI:1917646	Asnsd1	asparagine synthetase domain containing 1	0.677059	1.14491e-06	7.46561e-06	0.0988565	0.488103	0.803816
ENSMUSG00000026097.10	MGI:2181669	Ormdl1	ORM1-like 1 (S. cerevisiae)	0.741826	5.44001e-07	3.82302e-06	0.119873	0.429782	0.766908
ENSMUSG00000026121.14	MGI:109252	Sema4c	sema domain, immunoglobulin domain (Ig), transmembrane domain (TM) and short cytoplasmic domain, (semaphorin) 4C	1.2307	5.02325e-09	5.71257e-08	0.326483	0.125783	0.469267
ENSMUSG00000026126.16	MGI:108410	Ptpn18	protein tyrosine phosphatase, non-receptor type 18	3.0573	1.96182e-15	1.01153e-13	0.861217	0.0327027	0.261205
ENSMUSG00000026134.12	MGI:97758	Prim2	DNA primase, p58 subunit	0.821043	3.51354e-10	5.33728e-09	0.110494	0.430538	0.76735
ENSMUSG00000026142.16	MGI:1924117	Rhbdd1	rhomboid domain containing 1	1.13245	1.86686e-12	4.67463e-11	0.298042	0.0709784	0.36887
ENSMUSG00000026147.17	MGI:88465	Col9a1	collagen, type IX, alpha 1	1.67955	5.91476e-06	3.23585e-05	0.419569	0.340654	0.705767
ENSMUSG00000026167.15	MGI:108071	Wnt10a	wingless-type MMTV integration site family, member 10A	1.62379	0.000269578	0.00100104	0.593518	0.188528	0.56051
ENSMUSG00000026170.7	MGI:88594	Cyp27a1	cytochrome P450, family 27, subfamily a, polypeptide 1	1.4894	1.2415e-05	6.3276e-05	0.636501	0.0712514	0.36934
ENSMUSG00000026173.16	MGI:107469	Plcd4	phospholipase C, delta 4	1.25148	1.84542e-10	2.99292e-09	0.557351	0.0050056	0.0971179
ENSMUSG00000026176.14	MGI:2654470	Ctdsp1	CTD (carboxy-terminal domain, RNA polymerase II, polypeptide A) small phosphatase 1	1.28057	6.61255e-14	2.30326e-12	0.362953	0.0365377	0.27405
ENSMUSG00000026177.12	MGI:1345275	Slc11a1	solute carrier family 11 (proton-coupled divalent metal ion transporters), member 1	3.1875	2.49307e-15	1.24528e-13	1.56904	0.000140686	0.0104209
ENSMUSG00000026185.9	MGI:96440	Igfbp5	insulin-like growth factor binding protein 5	1.17	0.000539952	0.00187258	-0.254502	0.451829	0.781463
ENSMUSG00000026187.10	MGI:104517	Xrcc5	X-ray repair complementing defective repair in Chinese hamster cells 5	0.590129	5.24838e-06	2.90499e-05	0.0427321	0.746435	0.920853
ENSMUSG00000026189.14	MGI:2148199	Pecr	peroxisomal trans-2-enoyl-CoA reductase	0.590284	5.47053e-05	0.000239818	0.162535	0.285411	0.660261
ENSMUSG00000026193.16	MGI:95566	Fn1	fibronectin 1	2.13795	1.81382e-08	1.79147e-07	0.344752	0.364594	0.72252
ENSMUSG00000026196.8	MGI:1328361	Bard1	BRCA1 associated RING domain 1	2.8418	2.13498e-11	4.26862e-10	0.58543	0.208392	0.582602
ENSMUSG00000026200.14	MGI:1921827	Glb1l	galactosidase, beta 1-like	0.975624	2.18577e-11	4.36107e-10	0.206857	0.162219	0.524478
ENSMUSG00000026222.17	MGI:109561	Sp100	nuclear antigen Sp100	2.98914	1.34669e-18	2.0831e-16	0.891781	0.0100103	0.142319
ENSMUSG00000026228.7	MGI:109323	Htr2b	5-hydroxytryptamine (serotonin) receptor 2B	5.92635	6.05506e-06	3.30632e-05	0.23279	0.895874	0.972393
ENSMUSG00000026249.11	MGI:101780	Serpine2	serine (or cysteine) peptidase inhibitor, clade E, member 2	1.7712	2.09459e-15	1.06473e-13	0.323737	0.147444	0.502437
ENSMUSG00000026269.15	MGI:1914170	Rnpepl1	arginyl aminopeptidase (aminopeptidase B)-like 1	0.628518	8.21604e-10	1.13211e-08	0.214305	0.0390446	0.281257
ENSMUSG00000026271.16	MGI:1929509	Gpr35	G protein-coupled receptor 35	2.67701	1.7518e-08	1.73737e-07	1.18443	0.0206079	0.20791
ENSMUSG00000026276.21	MGI:97298	Septin2	septin 2	1.00731	3.01273e-12	7.18734e-11	0.120882	0.405144	0.748859
ENSMUSG00000026285.9	MGI:104879	Pdcd1	programmed cell death 1	4.35156	1.00243e-09	1.34833e-08	3.0354	0.0019782	0.0578155
ENSMUSG00000026288.15	MGI:107357	Inpp5d	inositol polyphosphate-5-phosphatase D	3.11253	2.61496e-18	3.59977e-16	0.896981	0.0123908	0.160365
ENSMUSG00000026303.7	MGI:2176380	Mlph	melanophilin	2.68986	7.85598e-12	1.71882e-10	0.517173	0.200087	0.573345
ENSMUSG00000026317.8	MGI:1349447	Cln8	CLN8 transmembrane ER and ERGIC protein	0.815996	1.65586e-09	2.108e-08	0.239137	0.0817126	0.393236
ENSMUSG00000026321.9	MGI:1314891	Tnfrsf11a	tumor necrosis factor receptor superfamily, member 11a, NFKB activator	3.09023	1.18954e-14	4.95286e-13	0.566717	0.167162	0.531911
ENSMUSG00000026358.14	MGI:1354694	Rgs1	regulator of G-protein signaling 1	4.57946	3.54665e-09	4.17345e-08	1.19613	0.175924	0.544586
ENSMUSG00000026360.10	MGI:1098271	Rgs2	regulator of G-protein signaling 2	2.0519	9.41465e-10	1.27528e-08	0.305884	0.362888	0.721273
ENSMUSG00000026365.16	MGI:88385	Cfh	complement component factor h	2.14898	3.89603e-10	5.86258e-09	0.450588	0.190799	0.563454
ENSMUSG00000026380.11	MGI:2444691	Tfcp2l1	transcription factor CP2-like 1	1.00495	0.000731813	0.00246286	0.0760698	0.801786	0.940508
ENSMUSG00000026383.15	MGI:103006	Epb41l5	erythrocyte membrane protein band 4.1 like 5	0.679708	3.35463e-07	2.48993e-06	0.276385	0.0432332	0.294334
ENSMUSG00000026385.17	MGI:94865	Dbi	diazepam binding inhibitor	1.797	3.30432e-15	1.60861e-13	0.220588	0.334375	0.700394
ENSMUSG00000026389.17	MGI:1915678	Steap3	STEAP family member 3	1.52437	8.16465e-11	1.43322e-09	0.40962	0.0853793	0.399319
ENSMUSG00000026393.11	MGI:1890645	Nek7	NIMA (never in mitosis gene a)-related expressed kinase 7	0.7568	8.65255e-09	9.26815e-08	0.00523495	0.96855	0.99221
ENSMUSG00000026407.18	MGI:88294	Cacna1s	calcium channel, voltage-dependent, L type, alpha 1S subunit	5.26211	1.31064e-09	1.71091e-08	0.852663	0.350676	0.713956
ENSMUSG00000026418.17	MGI:105073	Tnni1	troponin I, skeletal, slow 1	1.56112	1.32754e-05	6.72205e-05	0.742673	0.0458667	0.302118
ENSMUSG00000026424.9	MGI:1928503	Gpr37l1	G protein-coupled receptor 37-like 1	0.86205	6.54842e-14	2.28924e-12	0.0925708	0.422093	0.760797
ENSMUSG00000026429.10	MGI:1914446	Ube2t	ubiquitin-conjugating enzyme E2T	1.38873	4.2029e-06	2.37894e-05	-0.342667	0.280701	0.655531
ENSMUSG00000026430.17	MGI:1926375	Rassf5	Ras association (RalGDS/AF-6) domain family member 5	0.755622	0.000731737	0.00246286	0.385522	0.0877964	0.404223
ENSMUSG00000026433.14	MGI:2385107	Rab29	RAB29, member RAS oncogene family	2.47357	1.63296e-12	4.13208e-11	0.523197	0.142776	0.496217
ENSMUSG00000026435.16	MGI:1922082	Slc45a3	solute carrier family 45, member 3	1.49884	0.000562277	0.00194182	1.02941	0.0312447	0.255558
ENSMUSG00000026442.15	MGI:104753	Nfasc	neurofascin	0.738769	1.56461e-05	7.79487e-05	0.616955	0.000312753	0.0180436
ENSMUSG00000026456.19	MGI:1919267	Cyb5r1	cytochrome b5 reductase 1	0.872572	1.8491e-06	1.14589e-05	0.346766	0.0596949	0.339009
ENSMUSG00000026457.15	MGI:1919924	Adipor1	adiponectin receptor 1	1.18494	4.83528e-15	2.233e-13	0.179843	0.236958	0.614492
ENSMUSG00000026466.17	MGI:3582693	Tor1aip1	torsin A interacting protein 1	1.21642	2.67275e-16	1.79667e-14	0.176362	0.239151	0.616539
ENSMUSG00000026471.15	MGI:1195463	Mr1	major histocompatibility complex, class I-related	1.83869	3.32458e-14	1.23104e-12	0.439972	0.0764369	0.381409
ENSMUSG00000026478.15	MGI:99914	Lamc1	laminin, gamma 1	0.86911	1.0966e-08	1.14189e-07	0.215729	0.158186	0.518991
ENSMUSG00000026479.14	MGI:99913	Lamc2	laminin, gamma 2	2.02765	2.83858e-07	2.14636e-06	0.538786	0.179405	0.549314
ENSMUSG00000026480.13	MGI:97284	Ncf2	neutrophil cytosolic factor 2	3.22895	4.99005e-18	6.13542e-16	0.897185	0.0186084	0.198607
ENSMUSG00000026483.14	MGI:2137237	Niban1	niban apoptosis regulator 1	2.12021	1.75055e-10	2.8471e-09	0.94606	0.00597671	0.107091
ENSMUSG00000026509.16	MGI:88264	Capn2	calpain 2	0.975034	3.26061e-14	1.2136e-12	0.31145	0.0160877	0.183556
ENSMUSG00000026519.17	MGI:2384789	Tmem63a	transmembrane protein 63a	1.17105	4.1013e-06	2.32739e-05	0.362026	0.159098	0.52049
ENSMUSG00000026525.10	MGI:1338022	Opn3	opsin 3	2.00957	0.000160783	0.000628517	0.694744	0.238396	0.616363
ENSMUSG00000026536.10	MGI:3041120	Ifi211	interferon activated gene 211	4.60193	6.23597e-14	2.19602e-12	0.962389	0.12975	0.475915
ENSMUSG00000026547.16	MGI:1312985	Tagln2	transgelin 2	2.40276	1.94765e-12	4.8516e-11	0.271209	0.431628	0.767995
ENSMUSG00000026548.5	MGI:1923692	Slamf9	SLAM family member 9	3.93344	1.40784e-15	7.61372e-14	1.82933	0.000627431	0.0284312
ENSMUSG00000026558.14	MGI:1931744	Uck2	uridine-cytidine kinase 2	0.671228	4.8729e-06	2.71913e-05	0.118246	0.424525	0.76278
ENSMUSG00000026566.16	MGI:1915731	Mpzl1	myelin protein zero-like 1	1.0513	3.22211e-07	2.40476e-06	0.158383	0.444906	0.776748
ENSMUSG00000026579.9	MGI:88382	F5	coagulation factor V	2.46183	8.65412e-05	0.000361375	0.70957	0.279425	0.654546
ENSMUSG00000026580.17	MGI:98280	Selp	selectin, platelet	4.15269	0.00285431	0.00825837	-0.0905574	0.952512	0.988244
ENSMUSG00000026586.17	MGI:97712	Prrx1	paired related homeobox 1	1.20076	1.59783e-12	4.05032e-11	0.127265	0.467649	0.791209
ENSMUSG00000026589.15	MGI:2148802	Sec16b	SEC16 homolog B (S. cerevisiae)	2.10156	1.57254e-07	1.26273e-06	-0.493812	0.234972	0.612742
ENSMUSG00000026600.13	MGI:104665	Soat1	sterol O-acyltransferase 1	1.17413	1.73635e-12	4.37448e-11	0.0751098	0.654574	0.887525
ENSMUSG00000026605.15	MGI:1313302	Cenpf	centromere protein F	2.80375	6.72597e-16	3.91726e-14	1.17408	0.000951733	0.0366897
ENSMUSG00000026622.16	MGI:109359	Nek2	NIMA (never in mitosis gene a)-related expressed kinase 2	2.40186	3.84576e-12	8.9231e-11	0.622996	0.0975625	0.423353
ENSMUSG00000026627.8	MGI:1914200	Pacc1	proton activated chloride channel 1	1.55265	2.98491e-12	7.13279e-11	0.315464	0.163267	0.526054
ENSMUSG00000026628.14	MGI:109384	Atf3	activating transcription factor 3	3.65402	3.27915e-13	9.70622e-12	-0.00200481	0.996958	0.999204
ENSMUSG00000026630.10	MGI:1925491	Batf3	basic leucine zipper transcription factor, ATF-like 3	1.61171	0.00254593	0.00745612	0.208597	0.702035	0.906307
ENSMUSG00000026637.15	MGI:107548	Traf5	TNF receptor-associated factor 5	1.62102	2.17861e-08	2.1126e-07	0.447342	0.142382	0.495598
ENSMUSG00000026649.15	MGI:1922722	Cfap126	cilia and flagella associated protein 126	1.79046	5.67724e-06	3.11717e-05	1.69648	0.000214651	0.0142158
ENSMUSG00000026650.16	MGI:1202878	Meig1	meiosis expressed gene 1	0.920926	0.000874549	0.00288982	0.0704864	0.810406	0.943639
ENSMUSG00000026655.16	MGI:1913790	Fam107b	family with sequence similarity 107, member B	0.669109	1.03428e-05	5.36843e-05	0.470544	0.00226538	0.0623038
ENSMUSG00000026656.16	MGI:95499	Fcgr2b	Fc receptor, IgG, low affinity IIb	4.16847	2.0331e-18	2.92471e-16	1.34649	0.00505426	0.0975128
ENSMUSG00000026657.18	MGI:1919850	Frmd4a	FERM domain containing 4A	0.927254	2.04759e-10	3.28014e-09	0.284901	0.0516727	0.319483
ENSMUSG00000026669.15	MGI:1917274	Mcm10	minichromosome maintenance 10 replication initiation factor	2.71676	1.52579e-11	3.15137e-10	0.670607	0.105009	0.434971
ENSMUSG00000026674.10	MGI:1345277	Ddr2	discoidin domain receptor family, member 2	1.46243	5.44124e-14	1.93272e-12	0.343447	0.0807792	0.391266
ENSMUSG00000026676.8	MGI:1921436	Ccdc3	coiled-coil domain containing 3	1.73273	2.0372e-06	1.2468e-05	-0.0466242	0.898849	0.973288
ENSMUSG00000026678.11	MGI:1098434	Rgs5	regulator of G-protein signaling 5	0.702335	8.25958e-06	4.37475e-05	0.145577	0.356223	0.71757
ENSMUSG00000026683.15	MGI:1914227	Nuf2	NUF2, NDC80 kinetochore complex component	1.63014	4.66389e-09	5.3524e-08	0.754722	0.0088067	0.132952
ENSMUSG00000026701.16	MGI:894320	Prdx6	peroxiredoxin 6	1.66487	2.61759e-20	8.34548e-18	0.296794	0.100266	0.428523
ENSMUSG00000026708.17	MGI:1917704	Cenpl	centromere protein L	1.51403	1.69185e-08	1.68372e-07	0.442619	0.128635	0.473794
ENSMUSG00000026712.4	MGI:97142	Mrc1	mannose receptor, C type 1	1.12798	0.000864098	0.00285988	0.208348	0.542996	0.833188
ENSMUSG00000026725.18	MGI:2665790	Tnn	tenascin N	3.9495	0.00317412	0.00906967	0.321554	0.836431	0.951559
ENSMUSG00000026726.11	MGI:1931256	Cubn	cubilin (intrinsic factor-cobalamin receptor)	2.15908	0.000134538	0.000536567	1.17093	0.0355089	0.270247
ENSMUSG00000026727.11	MGI:103040	Rsu1	Ras suppressor protein 1	1.09778	8.31183e-11	1.45639e-09	0.148528	0.387002	0.73558
ENSMUSG00000026728.10	MGI:98932	Vim	vimentin	4.53086	5.20334e-23	5.34662e-20	1.53602	0.000828781	0.0335786
ENSMUSG00000026730.13	MGI:107372	Pter	phosphotriesterase related	1.86068	8.74825e-12	1.89103e-10	0.845076	0.00247105	0.0654867
ENSMUSG00000026748.14	MGI:1914698	Plxdc2	plexin domain containing 2	2.05685	7.94434e-15	3.46313e-13	0.234825	0.377131	0.730291
ENSMUSG00000026749.12	MGI:1891638	Nek6	NIMA (never in mitosis gene a)-related expressed kinase 6	0.952642	1.23025e-09	1.61845e-08	-0.04233	0.788007	0.935815
ENSMUSG00000026773.20	MGI:2181202	Pfkfb3	6-phosphofructo-2-kinase/fructose-2,6-biphosphatase 3	1.59173	1.11352e-08	1.15741e-07	0.136783	0.62452	0.874494
ENSMUSG00000026778.14	MGI:97601	Prkcq	protein kinase C, theta	0.587176	0.00203265	0.00611346	-0.00689207	0.971967	0.992435
ENSMUSG00000026779.7	MGI:1914371	Mastl	microtubule associated serine/threonine kinase-like	2.29421	1.73415e-11	3.53102e-10	0.647801	0.0870299	0.402638
ENSMUSG00000026785.15	MGI:2388285	Pkn3	protein kinase N3	1.38782	3.89096e-05	0.000177131	0.156654	0.653114	0.886761
ENSMUSG00000026786.15	MGI:1861354	Apbb1ip	amyloid beta (A4) precursor protein-binding, family B, member 1 interacting protein	3.06527	2.17312e-17	2.17849e-15	0.395869	0.280543	0.655453
ENSMUSG00000026796.17	MGI:2442910	Niban2	niban apoptosis regulator 2	1.86157	2.77056e-17	2.66371e-15	0.694223	0.00178107	0.0543609
ENSMUSG00000026806.16	MGI:2682639	Ddx31	DEAD/H box helicase 31	0.870147	2.00374e-07	1.57083e-06	0.0322619	0.850725	0.956414
ENSMUSG00000026814.17	MGI:95392	Eng	endoglin	0.990759	1.26292e-06	8.13969e-06	0.23701	0.249391	0.626726
ENSMUSG00000026829.10	MGI:2449143	Gbgt1	globoside alpha-1,3-N-acetylgalactosaminyltransferase 1	2.43469	1.4905e-09	1.91957e-08	0.500591	0.242278	0.620245
ENSMUSG00000026832.13	MGI:2183535	Cytip	cytohesin 1 interacting protein	4.52247	4.96172e-08	4.4527e-07	0.0624105	0.934965	0.983364
ENSMUSG00000026840.15	MGI:1344394	Lamc3	laminin gamma 3	0.986162	9.84033e-05	0.000405418	0.271979	0.286408	0.661457
ENSMUSG00000026842.17	MGI:87859	Abl1	c-abl oncogene 1, non-receptor tyrosine kinase	0.594748	5.86992e-08	5.19162e-07	0.177514	0.108026	0.440212
ENSMUSG00000026864.14	MGI:95835	Hspa5	heat shock protein 5	0.778805	0.00221461	0.0065891	-0.0303165	0.905239	0.974773
ENSMUSG00000026866.17	MGI:1918039	Kynu	kynureninase	4.03631	0.000707255	0.00238944	1.82571	0.188385
ENSMUSG00000026870.20	MGI:1925246	Cutal	cutA divalent cation tolerance homolog-like	2.56094	3.17168e-06	1.84125e-05	1.00936	0.081876	0.39326
ENSMUSG00000026873.10	MGI:1921266	Phf19	PHD finger protein 19	2.67181	4.58393e-13	1.32148e-11	0.14457	0.701078	0.905912
ENSMUSG00000026874.11	MGI:96031	Hc	hemolytic complement	2.85032	8.46855e-05	0.000354604	0.582189	0.461423
ENSMUSG00000026880.12	MGI:95403	Stom	stomatin	1.63229	1.10736e-09	1.47636e-08	0.623794	0.0207709	0.208851
ENSMUSG00000026896.15	MGI:1918836	Ifih1	interferon induced with helicase C domain 1	2.95353	8.756e-19	1.49064e-16	1.16152	0.000641838	0.0288873
ENSMUSG00000026922.14	MGI:1914762	Agpat2	1-acylglycerol-3-phosphate O-acyltransferase 2 (lysophosphatidic acid acyltransferase, beta)	2.72374	1.49645e-11	3.09521e-10	0.253681	0.542606	0.833039
ENSMUSG00000026923.16	MGI:97363	Notch1	notch 1	1.21293	4.20206e-12	9.66408e-11	0.341556	0.0525022	0.322018
ENSMUSG00000026928.15	MGI:2685628	Card9	caspase recruitment domain family, member 9	3.02273	7.19324e-15	3.17418e-13	0.66243	0.100855	0.429064
ENSMUSG00000026932.15	MGI:1915241	Nacc2	nucleus accumbens associated 2, BEN and BTB (POZ) domain containing	0.930202	8.89474e-15	3.81956e-13	0.214837	0.0749809	0.378901
ENSMUSG00000026938.11	MGI:1340905	Fcna	ficolin A	2.56844	0.00186345	0.00565901	0.959391	0.295258
ENSMUSG00000026946.10	MGI:1928368	Nmi	N-myc (and STAT) interactor	1.75582	5.57266e-13	1.57187e-11	0.372547	0.143122	0.496327
ENSMUSG00000026955.14	MGI:1919330	Sapcd2	suppressor APC domain containing 2	1.76063	3.93341e-07	2.87594e-06	0.696949	0.05817	0.33509
ENSMUSG00000026956.16	MGI:2443318	Uap1l1	UDP-N-acteylglucosamine pyrophosphorylase 1-like 1	1.87228	2.00026e-11	4.01602e-10	0.281926	0.318503	0.687509
ENSMUSG00000026958.14	MGI:1933213	Dpp7	dipeptidylpeptidase 7	1.14001	2.32506e-11	4.61658e-10	0.132395	0.442935	0.775542
ENSMUSG00000026970.17	MGI:1861774	Rbms1	RNA binding motif, single stranded interacting protein 1	1.202	1.1423e-07	9.46029e-07	0.246661	0.279748	0.654784
ENSMUSG00000026972.16	MGI:2446136	Arrdc1	arrestin domain containing 1	1.54081	1.46119e-07	1.18057e-06	0.473424	0.110475	0.443166
ENSMUSG00000026979.17	MGI:2674093	Psd4	pleckstrin and Sec7 domain containing 4	3.15707	3.94904e-15	1.87179e-13	0.894481	0.0321337	0.259395
ENSMUSG00000026981.16	MGI:96547	Il1rn	interleukin 1 receptor antagonist	5.5156	3.08707e-07	2.31598e-06	4.01559	0.00292804	0.0720262
ENSMUSG00000027007.17	MGI:1917849	Itprid2	ITPR interacting domain containing 2	1.06658	1.00177e-12	2.66868e-11	0.166747	0.267667	0.644218
ENSMUSG00000027015.5	MGI:2654575	Cybrd1	cytochrome b reductase 1	2.88281	4.4426e-15	2.07091e-13	1.00856	0.00695428	0.115978
ENSMUSG00000027074.15	MGI:1931054	Slc43a3	solute carrier family 43, member 3	4.73563	1.81074e-19	4.07007e-17	1.60483	0.00405999	0.0857063
ENSMUSG00000027075.17	MGI:1931352	Slc43a1	solute carrier family 43, member 1	2.32128	7.79552e-05	0.000329734	0.501198	0.417839
ENSMUSG00000027078.15	MGI:1914500	Ube2l6	ubiquitin-conjugating enzyme E2L 6	2.51673	6.86571e-21	2.66937e-18	0.445841	0.108387	0.440594
ENSMUSG00000027082.16	MGI:1095418	Tfpi	tissue factor pathway inhibitor	1.93938	8.69162e-10	1.1891e-08	0.286941	0.3745	0.728348
ENSMUSG00000027087.12	MGI:96608	Itgav	integrin alpha V	1.76257	1.39579e-15	7.56278e-14	0.0570941	0.796474	0.9391
ENSMUSG00000027107.4	MGI:87885	Chrna1	cholinergic receptor, nicotinic, alpha polypeptide 1 (muscle)	3.56399	6.83681e-13	1.88232e-11	0.272957	0.585131	0.857244
ENSMUSG00000027111.17	MGI:96605	Itga6	integrin alpha 6	2.09452	1.89532e-17	1.92686e-15	0.227347	0.35844	0.719293
ENSMUSG00000027115.15	MGI:2446977	Kif18a	kinesin family member 18A	3.13121	3.99911e-12	9.24164e-11	0.479757	0.296406	0.670239
ENSMUSG00000027163.14	MGI:1923751	Commd9	COMM domain containing 9	0.772053	1.10149e-12	2.89416e-11	0.0996246	0.370602	0.725704
ENSMUSG00000027168.22	MGI:97490	Pax6	paired box 6	0.736803	7.45684e-06	3.99369e-05	0.350217	0.0397303	0.283253
ENSMUSG00000027187.11	MGI:88271	Cat	catalase	0.649467	5.97781e-09	6.66146e-08	0.188751	0.0930817	0.415051
ENSMUSG00000027195.11	MGI:1926967	Hsd17b12	hydroxysteroid (17-beta) dehydrogenase 12	1.26894	5.90255e-06	3.23163e-05	-0.191694	0.49469	0.808069
ENSMUSG00000027199.15	MGI:1914342	Gatm	glycine amidinotransferase (L-arginine:glycine amidinotransferase)	0.844875	9.6689e-05	0.000399174	-0.0174733	0.935953	0.983774
ENSMUSG00000027215.14	MGI:104651	Cd82	CD82 antigen	1.75225	1.03107e-12	2.73411e-11	0.531198	0.0333948	0.263703
ENSMUSG00000027219.14	MGI:1913105	Slc28a2	solute carrier family 28 (sodium-coupled nucleoside transporter), member 2	6.1021	9.76957e-08	8.20673e-07	-1.12557	0.364599	0.72252
ENSMUSG00000027230.10	MGI:1347062	Creb3l1	cAMP responsive element binding protein 3-like 1	2.13621	3.0428e-07	2.28516e-06	0.977705	0.0204448	0.207491
ENSMUSG00000027242.15	MGI:1926186	Wdr76	WD repeat domain 76	1.18974	6.7954e-07	4.68176e-06	0.122401	0.621167	0.872858
ENSMUSG00000027248.14	MGI:95834	Pdia3	protein disulfide isomerase associated 3	1.00209	2.47514e-08	2.36115e-07	0.0235963	0.895692	0.972298
ENSMUSG00000027253.16	MGI:2442252	Lrp4	low density lipoprotein receptor-related protein 4	0.801011	1.34543e-06	8.62506e-06	0.250264	0.132875	0.480455
ENSMUSG00000027287.15	MGI:109356	Snap23	synaptosomal-associated protein 23	1.04119	4.90206e-09	5.59005e-08	0.0830424	0.645868	0.883553
ENSMUSG00000027293.14	MGI:1919619	Ehd4	EH-domain containing 4	2.67465	1.72407e-15	9.11823e-14	0.653201	0.0546643	0.326255
ENSMUSG00000027306.16	MGI:2675669	Nusap1	nucleolar and spindle associated protein 1	3.5168	7.20641e-19	1.26424e-16	0.651207	0.113132	0.447174
ENSMUSG00000027315.14	MGI:1338033	Spint1	serine protease inhibitor, Kunitz type 1	3.183	3.69298e-11	7.02717e-10	1.36719	0.00504489	0.0975128
ENSMUSG00000027318.18	MGI:1341813	Adam33	a disintegrin and metallopeptidase domain 33	5.29979	7.65995e-11	1.35401e-09	0.87328	0.323629	0.69143
ENSMUSG00000027322.12	MGI:99668	Siglec1	sialic acid binding Ig-like lectin 1, sialoadhesin	6.40822	3.70434e-16	2.36314e-14	2.46921	0.00353607	0.0802921
ENSMUSG00000027323.11	MGI:97890	Rad51	RAD51 recombinase	2.27642	1.08024e-12	2.85133e-11	0.487573	0.158036	0.518663
ENSMUSG00000027331.16	MGI:1289298	Knstrn	kinetochore-localized astrin/SPAG5 binding	2.61769	1.06039e-13	3.51886e-12	0.676359	0.0655098	0.353983
ENSMUSG00000027333.19	MGI:2445356	Smox	spermine oxidase	0.876907	3.55658e-08	3.2966e-07	0.135128	0.399809	0.74494
ENSMUSG00000027338.17	MGI:1346999	Prnd	prion like protein doppel	2.47928	0.0001082	0.000440378	0.407361	0.563421	0.844049
ENSMUSG00000027339.16	MGI:2442060	Rassf2	Ras association (RalGDS/AF-6) domain family member 2	0.990207	1.50378e-07	1.21191e-06	0.0545955	0.773303	0.929862
ENSMUSG00000027342.15	MGI:97503	Pcna	proliferating cell nuclear antigen	0.762211	5.66629e-07	3.96448e-06	-0.0875699	0.569322	0.847242
ENSMUSG00000027366.13	MGI:1913802	Sppl2a	signal peptide peptidase like 2A	0.687705	1.32123e-13	4.31476e-12	-0.0905415	0.335281	0.701206
ENSMUSG00000027368.7	MGI:101911	Dusp2	dual specificity phosphatase 2	2.74491	1.1787e-06	7.65687e-06	0.00118619	0.9984	0.999755
ENSMUSG00000027376.16	MGI:2138997	Prom2	prominin 2	2.531	7.1999e-10	1.00851e-08	1.37282	0.00405952	0.0857063
ENSMUSG00000027377.3	MGI:2385152	Mall	mal, T cell differentiation protein-like	1.77466	4.79207e-06	2.67908e-05	0.693697	0.0951727	0.41904
ENSMUSG00000027379.15	MGI:1100510	Bub1	BUB1, mitotic checkpoint serine/threonine kinase	3.61119	3.76002e-12	8.75238e-11	1.19958	0.0342668	0.265945
ENSMUSG00000027381.17	MGI:1197519	Bcl2l11	BCL2-like 11 (apoptosis facilitator)	1.82529	1.59013e-08	1.59407e-07	0.547749	0.0946179	0.418022
ENSMUSG00000027386.10	MGI:1917620	Fbln7	fibulin 7	2.17747	2.63247e-05	0.000124243	1.27272	0.0300972	0.251171
ENSMUSG00000027398.14	MGI:96543	Il1b	interleukin 1 beta	3.8624	2.25481e-06	1.36288e-05	1.29934	0.141449	0.494209
ENSMUSG00000027399.2	MGI:96542	Il1a	interleukin 1 alpha	2.76963	6.16254e-10	8.76434e-09	0.679895	0.157491	0.518345
ENSMUSG00000027400.12	MGI:97535	Pdyn	prodynorphin	1.7268	1.99321e-05	9.6951e-05	-1.06504	0.00876694	0.132711
ENSMUSG00000027408.8	MGI:1934569	Cpxm1	carboxypeptidase X 1 (M14 family)	0.82048	1.15909e-06	7.55166e-06	0.188208	0.277286	0.653164
ENSMUSG00000027412.13	MGI:1891342	Lpin3	lipin 3	2.24192	1.08995e-08	1.13537e-07	0.400834	0.324569	0.692196
ENSMUSG00000027422.16	MGI:1932395	Rrbp1	ribosome binding protein 1	2.22209	1.09828e-18	1.78134e-16	0.557396	0.0274476	0.239304
ENSMUSG00000027423.16	MGI:1916428	Snx5	sorting nexin 5	1.33011	1.04472e-11	2.23312e-10	0.109688	0.576035	0.851342
ENSMUSG00000027434.12	MGI:97347	Nkx2-2	NK2 homeobox 2	1.98828	5.24589e-09	5.9281e-08	0.0612907	0.863602	0.960731
ENSMUSG00000027435.9	MGI:106664	Cd93	CD93 antigen	1.73238	3.32983e-07	2.47424e-06	0.449723	0.188515	0.56051
ENSMUSG00000027447.7	MGI:102519	Cst3	cystatin C	1.29215	3.24113e-11	6.24166e-10	0.581306	0.00284145	0.0704428
ENSMUSG00000027454.11	MGI:1916520	Gins1	GINS complex subunit 1 (Psf1 homolog)	1.91725	4.47873e-10	6.62847e-09	0.660378	0.0493118	0.311781
ENSMUSG00000027459.17	MGI:1921097	Fam110a	family with sequence similarity 110, member A	0.757817	0.000102563	0.000420527	0.311212	0.124376	0.466851
ENSMUSG00000027460.8	MGI:1336887	Angpt4	angiopoietin 4	3.21864	0.000463193	0.00163036	1.74013	0.182086
ENSMUSG00000027463.15	MGI:1916948	Slc52a3	solute carrier protein family 52, member 3	1.06991	0.000514695	0.00179516	0.395766	0.218679	0.595131
ENSMUSG00000027469.17	MGI:1919369	Tpx2	TPX2, microtubule-associated	2.92481	2.61388e-17	2.56668e-15	1.12999	0.00182124	0.0551793
ENSMUSG00000027470.10	MGI:2139434	Mylk2	myosin, light polypeptide kinase 2, skeletal muscle	5.78545	0.00198542	0.00599461	0	1
ENSMUSG00000027472.15	MGI:1915809	Pdrg1	p53 and DNA damage regulated 1	0.703899	5.62192e-07	3.93548e-06	0.24045	0.0909005	0.409518
ENSMUSG00000027474.14	MGI:2385159	Ccm2l	cerebral cavernous malformation 2-like	0.647806	0.000416601	0.0014825	0.1394	0.465484	0.789416
ENSMUSG00000027479.15	MGI:891995	Mapre1	microtubule-associated protein, RP/EB family, member 1	0.866035	2.6098e-15	1.29683e-13	0.251179	0.0224569	0.215619
ENSMUSG00000027489.16	MGI:1861721	Necab3	N-terminal EF-hand calcium binding protein 3	1.01358	0.00150724	0.0046805	0.924862	0.00379519	0.0829264
ENSMUSG00000027490.18	MGI:101941	E2f1	E2F transcription factor 1	0.896527	2.98047e-06	1.74256e-05	0.117522	0.553088	0.837832
ENSMUSG00000027496.16	MGI:894678	Aurka	aurora kinase A	2.38646	3.96413e-15	1.87586e-13	0.412483	0.193795	0.566301
ENSMUSG00000027506.16	MGI:107749	Tpd52	tumor protein D52	0.96944	2.63637e-06	1.56491e-05	-0.0658313	0.750887	0.922057
ENSMUSG00000027508.16	MGI:2443160	Pag1	phosphoprotein associated with glycosphingolipid microdomains 1	0.727756	6.29277e-09	6.96636e-08	-0.0237496	0.851569	0.956562
ENSMUSG00000027510.18	MGI:1889294	Rbm38	RNA binding motif protein 38	0.8564	0.00157484	0.00486836	0.488149	0.0918763	0.412167
ENSMUSG00000027524.10	MGI:95285	Edn3	endothelin 3	0.742918	0.00150463	0.0046739	0.168923	0.478107	0.798606
ENSMUSG00000027533.11	MGI:101790	Fabp5	fatty acid binding protein 5, epidermal	1.28662	1.00053e-10	1.71347e-09	0.184824	0.354357	0.716095
ENSMUSG00000027540.14	MGI:97805	Ptpn1	protein tyrosine phosphatase, non-receptor type 1	0.816213	4.36761e-07	3.15254e-06	0.0243369	0.880992	0.966649
ENSMUSG00000027544.17	MGI:102463	Nfatc2	nuclear factor of activated T cells, cytoplasmic, calcineurin dependent 2	0.629949	0.0031406	0.00898639	-0.161811	0.456215	0.783552
ENSMUSG00000027555.9	MGI:1931322	Car13	carbonic anhydrase 13	3.35838	6.78367e-10	9.55793e-09	1.4451	0.0221188	0.214372
ENSMUSG00000027560.5	MGI:1924079	Dok5	docking protein 5	0.753393	0.000185193	0.000713565	0.081172	0.690118	0.902183
ENSMUSG00000027580.18	MGI:2385169	Helz2	helicase with zinc finger 2, transcriptional coactivator	2.50878	6.59996e-17	5.48807e-15	0.629223	0.0388087	0.280958
ENSMUSG00000027601.14	MGI:1914722	Mtfr1	mitochondrial fission regulator 1	0.859947	3.69019e-06	2.11116e-05	0.156044	0.41516	0.755811
ENSMUSG00000027611.13	MGI:104596	Procr	protein C receptor, endothelial	3.36816	2.93374e-11	5.70315e-10	0.720957	0.160744	0.522499
ENSMUSG00000027615.15	MGI:2153839	Hps3	HPS3, biogenesis of lysosomal organelles complex 2 subunit 1	0.819625	6.49135e-08	5.68878e-07	0.092991	0.545395	0.833525
ENSMUSG00000027635.16	MGI:1914184	Dsn1	DSN1 homolog, MIS12 kinetochore complex component	1.28953	2.46312e-09	3.00052e-08	0.701721	0.00214033	0.060636
ENSMUSG00000027639.17	MGI:1927468	Samhd1	SAM domain and HD domain, 1	1.34843	1.6687e-11	3.40739e-10	0.272246	0.17881	0.548509
ENSMUSG00000027641.14	MGI:103300	Rbl1	RB transcriptional corepressor like 1	2.39082	7.14052e-15	3.15576e-13	0.5935	0.0621376	0.345705
ENSMUSG00000027642.16	MGI:98085	Rpn2	ribophorin II	0.762376	7.26168e-11	1.29126e-09	0.0296185	0.801035	0.940508
ENSMUSG00000027654.3	MGI:1919128	Fam83d	family with sequence similarity 83, member D	1.13238	0.00138572	0.00435104	-0.577704	0.126487	0.470156
ENSMUSG00000027656.8	MGI:1328326	Ccn5	cellular communication network factor 5	8.12447	1.96983e-06	1.20917e-05	2.76446	0.135334	0.485318
ENSMUSG00000027661.5	MGI:2156687	Slc2a10	solute carrier family 2 (facilitated glucose transporter), member 10	0.980821	5.53309e-07	3.88464e-06	0.279913	0.186897	0.558223
ENSMUSG00000027695.17	MGI:109585	Pld1	phospholipase D1	1.64589	5.75724e-13	1.61917e-11	0.450393	0.0530801	0.323634
ENSMUSG00000027699.20	MGI:95281	Ect2	ect2 oncogene	2.75166	2.51983e-12	6.12831e-11	0.695482	0.0906863	0.409508
ENSMUSG00000027712.14	MGI:106008	Anxa5	annexin A5	2.27573	2.49047e-18	3.46152e-16	0.622965	0.0174084	0.191947
ENSMUSG00000027715.10	MGI:108069	Ccna2	cyclin A2	2.9434	1.48388e-14	5.97691e-13	0.685222	0.080921	0.391367
ENSMUSG00000027716.14	MGI:109526	Trpc3	transient receptor potential cation channel, subfamily C, member 3	1.02391	0.000740819	0.00248939	0.196249	0.531079	0.825892
ENSMUSG00000027750.17	MGI:1926321	Postn	periostin, osteoblast specific factor	2.2355	7.70291e-05	0.000326441	0.484663	0.405126	0.748859
ENSMUSG00000027762.7	MGI:1934135	Sucnr1	succinate receptor 1	8.62762	7.6038e-10	1.06044e-08	4.36583	0.002565	0.0669199
ENSMUSG00000027765.7	MGI:105049	P2ry1	purinergic receptor P2Y, G-protein coupled 1	1.72184	2.34309e-08	2.25311e-07	0.211489	0.51374	0.817875
ENSMUSG00000027775.10	MGI:1914118	Mfsd1	major facilitator superfamily domain containing 1	1.3905	3.98473e-12	9.22321e-11	0.0543603	0.787578	0.935648
ENSMUSG00000027800.15	MGI:104678	Tm4sf1	transmembrane 4 superfamily member 1	2.27197	5.08289e-11	9.37504e-10	0.302266	0.386332	0.735401
ENSMUSG00000027803.15	MGI:1917649	Wwtr1	WW domain containing transcription regulator 1	1.91996	1.00426e-13	3.34803e-12	0.269043	0.300546	0.673173
ENSMUSG00000027808.9	MGI:92638	Serp1	stress-associated endoplasmic reticulum protein 1	1.13402	8.80623e-11	1.52813e-09	-0.0256057	0.884252	0.968016
ENSMUSG00000027811.10	MGI:1923189	4930579G24Rik	RIKEN cDNA 4930579G24 gene	1.21864	0.00026147	0.000974449	-0.458563	0.204393	0.577738
ENSMUSG00000027831.10	MGI:1920039	Veph1	ventricular zone expressed PH domain-containing 1	2.60173	0.00144366	0.00451221	1.22824	0.279151
ENSMUSG00000027832.6	MGI:104641	Ptx3	pentraxin related gene	4.42466	5.15323e-13	1.46361e-11	0.983116	0.115275	0.450575
ENSMUSG00000027848.13	MGI:1914877	Olfml3	olfactomedin-like 3	3.51371	3.34874e-20	9.8313e-18	0.893764	0.019497	0.203674
ENSMUSG00000027852.15	MGI:97376	Nras	neuroblastoma ras oncogene	0.898461	9.96892e-11	1.70825e-09	0.183975	0.188637	0.560627
ENSMUSG00000027860.16	MGI:2159344	Vangl1	VANGL planar cell polarity 1	0.79751	1.06545e-05	5.51926e-05	0.367739	0.0516892	0.319489
ENSMUSG00000027864.10	MGI:1277114	Ptgfrn	prostaglandin F2 receptor negative regulator	3.12173	1.56253e-16	1.15567e-14	0.786163	0.038843	0.281027
ENSMUSG00000027878.12	MGI:97364	Notch2	notch 2	0.993521	5.37533e-09	6.05535e-08	0.400766	0.0189955	0.200666
ENSMUSG00000027882.19	MGI:107362	Stxbp3	syntaxin binding protein 3	0.814344	3.34496e-15	1.6229e-13	0.229312	0.0306727	0.252305
ENSMUSG00000027900.16	MGI:1914421	Dram2	DNA-damage regulated autophagy modulator 2	0.803333	1.27818e-09	1.67385e-08	0.0358958	0.789682	0.936371
ENSMUSG00000027901.13	MGI:2181193	Dennd2d	DENN/MADD domain containing 2D	1.92018	0.000137297	0.000546435	0.737582	0.193073	0.565783
ENSMUSG00000027907.5	MGI:1338798	S100a11	S100 calcium binding protein A11	3.50879	7.28556e-16	4.20909e-14	0.896249	0.0451456	0.300046
ENSMUSG00000027932.15	MGI:1347358	Slc27a3	solute carrier family 27 (fatty acid transporter), member 3	0.921059	0.000502452	0.00175629	0.412985	0.118596	0.457362
ENSMUSG00000027935.15	MGI:1927232	Rab13	RAB13, member RAS oncogene family	1.0852	1.15954e-09	1.53597e-08	0.408743	0.0327642	0.261538
ENSMUSG00000027947.12	MGI:105304	Il6ra	interleukin 6 receptor, alpha	1.5868	1.45263e-10	2.40469e-09	0.225116	0.368412	0.724789
ENSMUSG00000027961.8	MGI:1924557	Lrrc39	leucine rich repeat containing 39	3.49193	1.49919e-12	3.84088e-11	1.12478	0.0522956	0.321422
ENSMUSG00000027962.15	MGI:98926	Vcam1	vascular cell adhesion molecule 1	2.44834	1.26755e-21	7.15071e-19	0.594991	0.0208419	0.208955
ENSMUSG00000027966.21	MGI:88446	Col11a1	collagen, type XI, alpha 1	1.04883	0.00262368	0.00765654	0.00554617	0.987366	0.997292
ENSMUSG00000027984.9	MGI:96009	Hadh	hydroxyacyl-Coenzyme A dehydrogenase	1.06684	1.51208e-13	4.84996e-12	0.239881	0.102691	0.431194
ENSMUSG00000027985.15	MGI:96770	Lef1	lymphoid enhancer binding factor 1	0.866048	5.38011e-05	0.000236106	0.267683	0.222618	0.599249
ENSMUSG00000027997.10	MGI:1312921	Casp6	caspase 6	1.03133	1.60713e-06	1.01024e-05	0.465679	0.0352764	0.26947
ENSMUSG00000028015.4	MGI:2139628	Ctso	cathepsin O	1.0607	4.4483e-15	2.07091e-13	0.331925	0.0151737	0.178855
ENSMUSG00000028019.10	MGI:1859631	Pdgfc	platelet-derived growth factor, C polypeptide	0.919808	9.54572e-05	0.000394768	0.381596	0.111045	0.443786
ENSMUSG00000028028.12	MGI:1918731	Alpk1	alpha-kinase 1	0.58905	5.42902e-05	0.000238107	0.298758	0.0464964	0.304422
ENSMUSG00000028031.7	MGI:1890663	Dkk2	dickkopf WNT signaling pathway inhibitor 2	3.00791	1.72567e-05	8.51469e-05	0.540539	0.458856	0.78514
ENSMUSG00000028040.8	MGI:106643	Efna4	ephrin A4	1.17446	0.000769828	0.00257453	0.442187	0.231583	0.60927
ENSMUSG00000028042.16	MGI:102755	Zbtb7b	zinc finger and BTB domain containing 7B	1.24485	7.68206e-08	6.62134e-07	0.295499	0.2097	0.584596
ENSMUSG00000028044.7	MGI:1889208	Cks1b	CDC28 protein kinase 1b	2.03938	3.77496e-11	7.15477e-10	0.27148	0.404219	0.748505
ENSMUSG00000028048.12	MGI:95665	Gba	glucosidase, beta, acid	1.37193	3.31943e-12	7.85384e-11	0.109501	0.5813	0.855026
ENSMUSG00000028063.16	MGI:96794	Lmna	lamin A	0.947695	1.26598e-08	1.29759e-07	0.449497	0.00737094	0.119643
ENSMUSG00000028066.16	MGI:1914287	Pmf1	polyamine-modulated factor 1	1.68067	1.1816e-10	1.99857e-09	0.403658	0.140173	0.492165
ENSMUSG00000028068.15	MGI:3028642	Iqgap3	IQ motif containing GTPase activating protein 3	4.20681	1.01285e-17	1.12949e-15	1.06081	0.0330055	0.262382
ENSMUSG00000028073.16	MGI:1920432	Pear1	platelet endothelial aggregation receptor 1	1.11389	8.27652e-06	4.38211e-05	0.418367	0.101727	0.429922
ENSMUSG00000028082.15	MGI:1350923	Sh3d19	SH3 domain protein D19	0.599129	0.00261533	0.00763683	-0.135863	0.498314	0.810335
ENSMUSG00000028088.15	MGI:1310004	Fmo5	flavin containing monooxygenase 5	1.18088	2.38002e-07	1.82943e-06	0.321158	0.170337	0.535712
ENSMUSG00000028108.17	MGI:103060	Ecm1	extracellular matrix protein 1	2.78234	1.83691e-13	5.78225e-12	0.64755	0.0901878	0.408722
ENSMUSG00000028111.5	MGI:107823	Ctsk	cathepsin K	1.47461	0.000101857	0.000418169	0.628731	0.113133	0.447174
ENSMUSG00000028121.9	MGI:1352501	Bcar3	breast cancer anti-estrogen resistance 3	0.851415	0.000256456	0.000956756	0.197365	0.403584	0.747986
ENSMUSG00000028128.14	MGI:88381	F3	coagulation factor III	0.911235	2.39294e-14	9.17964e-13	0.138282	0.253811	0.631335
ENSMUSG00000028150.15	MGI:104856	Rorc	RAR-related orphan receptor gamma	1.06226	6.49584e-05	0.000279694	0.510655	0.0643662	0.35148
ENSMUSG00000028159.15	MGI:1347063	Dapp1	dual adaptor for phosphotyrosine and 3-phosphoinositides 1	1.23656	3.12088e-11	6.03433e-10	0.386057	0.0449366	0.299677
ENSMUSG00000028163.18	MGI:97312	Nfkb1	nuclear factor of kappa light polypeptide gene enhancer in B cells 1, p105	1.23784	2.13889e-13	6.64124e-12	0.300686	0.0782141	0.385496
ENSMUSG00000028164.16	MGI:88175	Manba	mannosidase, beta A, lysosomal	1.02464	1.76523e-05	8.69053e-05	0.163468	0.498743	0.810629
ENSMUSG00000028173.11	MGI:1915401	Wls	wntless WNT ligand secretion mediator	1.22236	3.24907e-09	3.85799e-08	0.48119	0.020783	0.208871
ENSMUSG00000028175.16	MGI:1923381	Depdc1a	DEP domain containing 1a	3.46552	4.11191e-07	2.99049e-06	1.74069	0.0475231	0.306569
ENSMUSG00000028179.13	MGI:1339968	Cth	cystathionase (cystathionine gamma-lyase)	0.629751	0.00306904	0.00881055	-0.0373523	0.864594	0.961141
ENSMUSG00000028182.15	MGI:1921685	Lrriq3	leucine-rich repeats and IQ motif containing 3	1.23147	0.000873697	0.00288767	0.545288	0.165711	0.530189
ENSMUSG00000028188.14	MGI:1918201	Spata1	spermatogenesis associated 1	1.05838	2.51555e-05	0.000119371	0.842466	0.00208699	0.059977
ENSMUSG00000028189.13	MGI:1921495	Ctbs	chitobiase	0.823525	1.04698e-07	8.74643e-07	-0.008011	0.959774	0.989708
ENSMUSG00000028191.12	MGI:1337994	Bcl10	B cell leukemia/lymphoma 10	1.11303	2.09663e-12	5.18232e-11	0.209647	0.200355	0.573558
ENSMUSG00000028194.16	MGI:1916469	Ddah1	dimethylarginine dimethylaminohydrolase 1	1.59846	1.11911e-14	4.70042e-13	0.19874	0.337885	0.703447
ENSMUSG00000028195.5	MGI:88613	Ccn1	cellular communication network factor 1	4.90178	2.09084e-14	8.12914e-13	0.478429	0.459178	0.78556
ENSMUSG00000028211.12	MGI:1926609	Trp53inp1	transformation related protein 53 inducible nuclear protein 1	0.768239	8.11981e-06	4.31263e-05	0.131006	0.451815	0.781463
ENSMUSG00000028214.14	MGI:99844	Gem	GTP binding protein (gene overexpressed in skeletal muscle)	3.05497	2.35012e-12	5.74471e-11	1.03871	0.0214187	0.21186
ENSMUSG00000028217.12	MGI:1095414	Cdh17	cadherin 17	4.53876	0.000757796	0.0025405	-1.56698	0.308114
ENSMUSG00000028223.9	MGI:1914710	Decr1	2,4-dienoyl CoA reductase 1, mitochondrial	1.3846	4.43549e-15	2.07091e-13	0.118753	0.506324	0.813811
ENSMUSG00000028228.6	MGI:1917818	Cpne3	copine III	1.23588	1.17091e-12	3.05424e-11	0.206489	0.241549	0.619708
ENSMUSG00000028234.7	MGI:1914677	Rps20	ribosomal protein S20	0.79146	9.38454e-10	1.2718e-08	0.0081364	0.950077	0.987512
ENSMUSG00000028262.14	MGI:1931471	Clca3a2	chloride channel accessory 3A2	4.58145	0.000149497	0.000589121	0.33456	0.799977	0.940508
ENSMUSG00000028273.16	MGI:1927489	Pdlim5	PDZ and LIM domain 5	1.23583	7.86216e-11	1.38604e-09	0.119546	0.532162	0.826562
ENSMUSG00000028327.15	MGI:1921402	Stra6l	STRA6-like	7.5394	1.8222e-08	1.79789e-07	0.549215	0.744322	0.920207
ENSMUSG00000028333.11	MGI:1914878	Anp32b	acidic (leucine-rich) nuclear phosphoprotein 32 family, member B	0.69556	6.9841e-09	7.61712e-08	-0.0576132	0.634751	0.879492
ENSMUSG00000028334.11	MGI:2149820	Nans	N-acetylneuraminic acid synthase (sialic acid synthase)	0.783652	9.50543e-06	4.96516e-05	0.256551	0.155136	0.515365
ENSMUSG00000028339.18	MGI:88449	Col15a1	collagen, type XV, alpha 1	1.83989	8.18966e-07	5.5285e-06	0.0794932	0.832475	0.950481
ENSMUSG00000028362.3	MGI:88328	Tnfsf8	tumor necrosis factor (ligand) superfamily, member 8	6.05783	4.45285e-09	5.13273e-08	2.14357	0.0656473	0.354203
ENSMUSG00000028364.16	MGI:101922	Tnc	tenascin C	3.84717	7.10712e-15	3.14583e-13	0.487025	0.325884	0.693057
ENSMUSG00000028370.8	MGI:97479	Pappa	pregnancy-associated plasma protein A	2.76119	2.82327e-07	2.13703e-06	0.593577	0.276439	0.65257
ENSMUSG00000028378.7	MGI:1914353	Ptgr1	prostaglandin reductase 1	0.837974	0.00110312	0.00354929	-0.340687	0.200244	0.573533
ENSMUSG00000028407.5	MGI:1913684	Smim27	small integral membrane protein 27	0.744265	0.000361953	0.00130514	0.393486	0.0899508	0.408226
ENSMUSG00000028412.18	MGI:2140592	Slc44a1	solute carrier family 44, member 1	1.05636	2.87826e-08	2.71154e-07	0.192007	0.314428	0.684457
ENSMUSG00000028413.14	MGI:95705	B4galt1	UDP-Gal:betaGlcNAc beta 1,4- galactosyltransferase, polypeptide 1	1.90593	5.89806e-15	2.67233e-13	0.404104	0.10116	0.429221
ENSMUSG00000028438.17	MGI:1918345	Kif24	kinesin family member 24	1.58637	1.90746e-05	9.31268e-05	0.363476	0.354145	0.715808
ENSMUSG00000028459.12	MGI:88345	Cd72	CD72 antigen	7.27696	2.03405e-15	1.03946e-13	2.58452	0.0101574	0.14345
ENSMUSG00000028463.15	MGI:2447188	Car9	carbonic anhydrase 9	2.78732	0.00264446	0.00771171	3.76318	0.00559201	0.10326
ENSMUSG00000028465.17	MGI:1099832	Tln1	talin 1	1.93431	6.15273e-16	3.65744e-14	0.391251	0.10312	0.431678
ENSMUSG00000028480.15	MGI:1917770	Glipr2	GLI pathogenesis-related 2	3.27929	3.02512e-15	1.49034e-13	0.503692	0.232421	0.610023
ENSMUSG00000028494.13	MGI:87920	Plin2	perilipin 2	3.96016	4.32304e-18	5.36113e-16	0.414577	0.368791	0.724848
ENSMUSG00000028497.13	MGI:1914025	Hacd4	3-hydroxyacyl-CoA dehydratase 4	3.53603	3.7519e-17	3.42282e-15	1.34147	0.00163876	0.0514617
ENSMUSG00000028521.18	MGI:2140361	Slc35d1	solute carrier family 35 (UDP-glucuronic acid/UDP-N-acetylgalactosamine dual transporter), member D1	0.697652	3.01859e-07	2.27053e-06	0.207261	0.134021	0.482536
ENSMUSG00000028542.18	MGI:95760	Slc6a9	solute carrier family 6 (neurotransmitter transporter, glycine), member 9	0.599435	0.000567656	0.00195851	0.238412	0.174558	0.541737
ENSMUSG00000028551.15	MGI:105388	Cdkn2c	cyclin dependent kinase inhibitor 2C	2.23254	1.20974e-12	3.14367e-11	0.626381	0.0547539	0.3266
ENSMUSG00000028556.16	MGI:1914549	Dock7	dedicator of cytokinesis 7	0.639216	1.19532e-10	2.0206e-09	0.163763	0.10096	0.42907
ENSMUSG00000028559.18	MGI:1923784	Osbpl9	oxysterol binding protein-like 9	0.62167	9.27579e-08	7.84e-07	0.180257	0.12554	0.468829
ENSMUSG00000028567.9	MGI:1913323	Txndc12	thioredoxin domain containing 12 (endoplasmic reticulum)	1.03255	1.40786e-08	1.42947e-07	-0.0258997	0.888254	0.969264
ENSMUSG00000028581.18	MGI:108046	Laptm5	lysosomal-associated protein transmembrane 5	3.48004	1.37229e-20	4.64496e-18	0.946351	0.0115822	0.154302
ENSMUSG00000028583.15	MGI:103098	Pdpn	podoplanin	2.34489	1.24882e-14	5.14359e-13	0.358692	0.244531	0.622183
ENSMUSG00000028597.12	MGI:1914555	Gpx7	glutathione peroxidase 7	1.35293	2.87142e-08	2.70599e-07	0.297768	0.24093	0.618887
ENSMUSG00000028599.11	MGI:1314883	Tnfrsf1b	tumor necrosis factor receptor superfamily, member 1b	3.25898	3.57091e-16	2.30874e-14	0.844756	0.0370333	0.275872
ENSMUSG00000028600.16	MGI:2674939	Podn	podocan	3.00553	2.28759e-08	2.2049e-07	1.65077	0.00252324	0.0660806
ENSMUSG00000028607.17	MGI:109176	Cpt2	carnitine palmitoyltransferase 2	1.65398	6.43301e-12	1.42892e-10	0.547572	0.0292565	0.24728
ENSMUSG00000028610.17	MGI:1927125	Dmrtb1	DMRT-like family B with proline-rich C-terminal, 1	1.51447	0.00220114	0.00655378	0.0440999	0.942992	0.985885
ENSMUSG00000028621.18	MGI:1919657	Cyb5rl	cytochrome b5 reductase-like	0.591366	0.000493321	0.00172773	0.28702	0.104197	0.433886
ENSMUSG00000028626.6	MGI:88466	Col9a2	collagen, type IX, alpha 2	2.82754	1.33905e-13	4.36307e-12	0.809288	0.0384085	0.279645
ENSMUSG00000028639.15	MGI:99146	Ybx1	Y box protein 1	0.694609	1.91495e-08	1.87846e-07	0.0415416	0.737672	0.91794
ENSMUSG00000028640.12	MGI:106032	Tfap2c	transcription factor AP-2, gamma	2.06632	0.000455366	0.00160654	0.390396	0.505222	0.813101
ENSMUSG00000028643.12	MGI:1916466	Svbp	small vasohibin binding protein	0.99509	2.38942e-12	5.83087e-11	0.264936	0.072462	0.371811
ENSMUSG00000028645.12	MGI:95755	Slc2a1	solute carrier family 2 (facilitated glucose transporter), member 1	0.69307	0.000409016	0.00145858	0.203542	0.300389	0.673173
ENSMUSG00000028651.13	MGI:1917118	Ppie	peptidylprolyl isomerase E (cyclophilin E)	0.719076	6.15489e-06	3.35383e-05	-0.0527851	0.74521	0.920306
ENSMUSG00000028655.12	MGI:1923824	Mfsd2a	major facilitator superfamily domain containing 2A	1.65339	6.18397e-09	6.86151e-08	-0.297658	0.298572	0.671699
ENSMUSG00000028657.15	MGI:1298204	Ppt1	palmitoyl-protein thioesterase 1	0.968178	4.1413e-12	9.53959e-11	0.107179	0.444489	0.776634
ENSMUSG00000028673.11	MGI:95593	Fuca1	fucosidase, alpha-L- 1, tissue	1.69894	1.69126e-14	6.68397e-13	0.256512	0.250179	0.627574
ENSMUSG00000028678.14	MGI:1921054	Kif2c	kinesin family member 2C	3.88443	3.07912e-13	9.22805e-12	1.97146	0.00111766	0.0400941
ENSMUSG00000028680.15	MGI:109604	Plk3	polo like kinase 3	1.52935	6.61404e-08	5.78748e-07	0.816412	0.00512044	0.0980571
ENSMUSG00000028689.15	MGI:1915644	Ccdc163	coiled-coil domain containing 163	1.57993	1.64603e-08	1.64209e-07	0.627223	0.033873	0.264489
ENSMUSG00000028691.13	MGI:99523	Prdx1	peroxiredoxin 1	1.14286	4.17951e-14	1.51256e-12	0.0229651	0.879712	0.965932
ENSMUSG00000028702.16	MGI:894697	Rad54l	RAD54 like (S. cerevisiae)	2.08864	2.38881e-10	3.75771e-09	-0.0245895	0.941805	0.985363
ENSMUSG00000028706.15	MGI:1919431	Nsun4	NOL1/NOP2/Sun domain family, member 4	0.611751	1.33006e-07	1.0893e-06	0.155472	0.189135	0.560863
ENSMUSG00000028709.4	MGI:2140623	Mob3c	MOB kinase activator 3C	0.966636	5.17189e-07	3.65963e-06	0.332743	0.0948419	0.418296
ENSMUSG00000028716.16	MGI:1914432	Pdzk1ip1	PDZK1 interacting protein 1	4.10171	0.00142372	0.00445626	2.29234	0.127308
ENSMUSG00000028717.13	MGI:98480	Tal1	T cell acute lymphocytic leukemia 1	2.23405	2.78181e-10	4.31225e-09	0.639568	0.0882333	0.404936
ENSMUSG00000028718.17	MGI:107477	Stil	Scl/Tal1 interrupting locus	2.78533	7.81892e-10	1.08623e-08	0.86104	0.0754987	0.379569
ENSMUSG00000028744.16	MGI:2384837	Slc66a1	solute carrier family 66 member 1	0.621185	3.43485e-07	2.54439e-06	0.0968661	0.440408	0.773889
ENSMUSG00000028757.5	MGI:1194508	Ddost	dolichyl-di-phosphooligosaccharide-protein glycotransferase	0.708081	1.43996e-11	2.98696e-10	0.0200853	0.849007	0.95618
ENSMUSG00000028763.19	MGI:96257	Hspg2	perlecan (heparan sulfate proteoglycan 2)	1.68123	3.80795e-08	3.4958e-07	0.564099	0.066804	0.357312
ENSMUSG00000028792.15	MGI:87978	Ak2	adenylate kinase 2	0.803838	9.03007e-11	1.55945e-09	0.0319848	0.801013	0.940508
ENSMUSG00000028813.3	MGI:3616080	CK137956	cDNA sequence CK137956	1.78419	0.000175838	0.000680711	0.528639	0.277666	0.653464
ENSMUSG00000028864.8	MGI:96079	Hgf	hepatocyte growth factor	1.66098	8.30505e-05	0.000348671	0.79382	0.0652645	0.352863
ENSMUSG00000028868.14	MGI:1098641	Wasf2	WASP family, member 2	1.69188	1.9458e-16	1.3647e-14	0.35158	0.0903465	0.409034
ENSMUSG00000028873.17	MGI:1196274	Cdca8	cell division cycle associated 8	2.11542	6.28409e-10	8.92838e-09	0.570626	0.111025	0.443786
ENSMUSG00000028874.15	MGI:95527	Fgr	FGR proto-oncogene, Src family tyrosine kinase	4.70816	1.6941e-10	2.77094e-09	2.08767	0.00946509	0.138511
ENSMUSG00000028883.20	MGI:107558	Sema3a	sema domain, immunoglobulin domain (Ig), short basic domain, secreted, (semaphorin) 3A	2.60007	1.92447e-06	1.18563e-05	0.864638	0.119611	0.459342
ENSMUSG00000028885.9	MGI:1916022	Smpdl3b	sphingomyelin phosphodiesterase, acid-like 3B	1.04356	4.66209e-05	0.000207851	-0.308689	0.254035	0.631589
ENSMUSG00000028919.12	MGI:1925912	Arhgef19	Rho guanine nucleotide exchange factor (GEF) 19	1.06735	5.84855e-12	1.31255e-10	0.588884	0.000191276	0.0131307
ENSMUSG00000028923.15	MGI:1913397	Necap2	NECAP endocytosis associated 2	1.73445	8.05994e-18	9.2757e-16	0.387401	0.0576476	0.333568
ENSMUSG00000028927.7	MGI:1338892	Padi2	peptidyl arginine deiminase, type II	0.954433	2.34855e-07	1.80669e-06	0.652182	0.000446287	0.0228824
ENSMUSG00000028946.8	MGI:104877	Hes3	hes family bHLH transcription factor 3	5.77436	0.00022736	0.000858787	1.52671	0.372666
ENSMUSG00000028955.4	MGI:1321389	Vamp3	vesicle-associated membrane protein 3	1.31937	2.9524e-12	7.06686e-11	0.0985745	0.605638	0.866238
ENSMUSG00000028961.16	MGI:97553	Pgd	phosphogluconate dehydrogenase	1.26301	2.10529e-13	6.55535e-12	0.255115	0.141726	0.494927
ENSMUSG00000028962.15	MGI:109351	Slc4a2	solute carrier family 4 (anion exchanger), member 2	0.949061	3.29568e-10	5.04094e-09	0.321823	0.035949	0.271993
ENSMUSG00000028970.10	MGI:97568	Abcb1b	ATP-binding cassette, sub-family B (MDR/TAP), member 1B	1.26546	2.73822e-10	4.25385e-09	0.177625	0.38285	0.733049
ENSMUSG00000028976.11	MGI:1928369	Slc2a5	solute carrier family 2 (facilitated glucose transporter), member 5	1.61638	7.25944e-08	6.28911e-07	0.0372746	0.903204	0.974314
ENSMUSG00000028978.13	MGI:97362	Nos3	nitric oxide synthase 3, endothelial cell	0.784565	0.000547874	0.00189823	0.402856	0.0784681	0.385861
ENSMUSG00000028980.15	MGI:2140356	H6pd	hexose-6-phosphate dehydrogenase (glucose 1-dehydrogenase)	1.05491	2.69732e-06	1.59779e-05	0.047375	0.835894	0.951472
ENSMUSG00000028988.14	MGI:1915756	Ctnnbip1	catenin beta interacting protein 1	0.605316	1.67166e-07	1.3371e-06	0.0657643	0.574893	0.850749
ENSMUSG00000028989.4	MGI:3605801	Angptl7	angiopoietin-like 7	1.73712	0.00340656	0.00966761	0.53336	0.393215
ENSMUSG00000028990.14	MGI:1916401	Lzic	leucine zipper and CTNNBIP1 domain containing	0.833033	2.6907e-10	4.18681e-09	0.237082	0.0820213	0.393409
ENSMUSG00000029003.12	MGI:1919140	Mad2l2	MAD2 mitotic arrest deficient-like 2	0.879223	4.68465e-12	1.06885e-10	0.270823	0.0427967	0.29304
ENSMUSG00000029007.9	MGI:1339977	Agtrap	angiotensin II, type I receptor-associated protein	1.55146	1.86553e-16	1.322e-14	0.590082	0.00226918	0.0623038
ENSMUSG00000029032.13	MGI:2446219	Arhgef16	Rho guanine nucleotide exchange factor (GEF) 16	2.68518	0.000135827	0.000541106	0.60008	0.408264
ENSMUSG00000029070.10	MGI:1922011	Mxra8	matrix-remodelling associated 8	2.3027	1.41515e-14	5.74264e-13	0.52936	0.0832136	0.395793
ENSMUSG00000029082.18	MGI:105370	Bst1	bone marrow stromal cell antigen 1	2.9393	0.000131155	0.00052431	-0.172074	0.83154	0.950131
ENSMUSG00000029084.6	MGI:107474	Cd38	CD38 antigen	0.961849	1.32177e-06	8.49234e-06	0.188016	0.351673	0.714256
ENSMUSG00000029090.13	MGI:1917943	Adgra3	adhesion G protein-coupled receptor A3	0.699819	2.62269e-06	1.55839e-05	0.309919	0.0390417	0.281257
ENSMUSG00000029093.15	MGI:1932289	Sorcs2	sortilin-related VPS10 domain containing receptor 2	0.979422	0.000102419	0.000420117	-0.15792	0.532017	0.826546
ENSMUSG00000029096.16	MGI:1925808	Htra3	HtrA serine peptidase 3	2.80657	9.0048e-17	7.25706e-15	0.88372	0.0110223	0.15123
ENSMUSG00000029098.18	MGI:1933156	Acox3	acyl-Coenzyme A oxidase 3, pristanoyl	1.2462	2.7151e-12	6.54808e-11	0.275758	0.124719	0.467043
ENSMUSG00000029108.15	MGI:1860487	Pcdh7	protocadherin 7	0.651156	0.00160788	0.00495876	0.431492	0.0367364	0.274732
ENSMUSG00000029119.10	MGI:1195262	Man2b2	mannosidase 2, alpha B2	2.51343	1.99812e-19	4.42214e-17	0.683352	0.0148087	0.177284
ENSMUSG00000029134.15	MGI:1922406	Plb1	phospholipase B1	2.27896	4.57273e-06	2.56857e-05	0.248472	0.618604	0.872089
ENSMUSG00000029135.11	MGI:102858	Fosl2	fos-like antigen 2	2.54978	7.56e-09	8.16168e-08	0.51875	0.240187	0.617978
ENSMUSG00000029136.10	MGI:1918586	Rbks	ribokinase	0.794852	0.000907285	0.00298804	-0.00818445	0.974603	0.993661
ENSMUSG00000029163.10	MGI:1926189	Emilin1	elastin microfibril interfacer 1	3.29841	7.3667e-14	2.53871e-12	1.15922	0.00970582	0.140738
ENSMUSG00000029171.13	MGI:97564	Pgm2	phosphoglucomutase 2	1.04756	2.44548e-09	2.98258e-08	0.297583	0.0961999	0.421407
ENSMUSG00000029175.18	MGI:1922169	Slc35f6	solute carrier family 35, member F6	0.751168	8.53871e-08	7.25967e-07	-0.0284317	0.84115	0.953673
ENSMUSG00000029177.10	MGI:88375	Cenpa	centromere protein A	2.02641	4.47662e-07	3.22255e-06	0.0275644	0.946844	0.986889
ENSMUSG00000029185.15	MGI:1915553	Fam114a1	family with sequence similarity 114, member A1	2.16314	2.53441e-14	9.64519e-13	0.452402	0.122457	0.464194
ENSMUSG00000029186.13	MGI:1914323	Pi4k2b	phosphatidylinositol 4-kinase type 2 beta	1.71053	6.01344e-10	8.58198e-09	0.452345	0.120273	0.460086
ENSMUSG00000029189.11	MGI:1916941	Sel1l3	sel-1 suppressor of lin-12-like 3 (C. elegans)	1.03957	2.32798e-07	1.79374e-06	0.670698	0.00087085	0.0346046
ENSMUSG00000029201.15	MGI:1306785	Ugdh	UDP-glucose dehydrogenase	1.26594	7.77828e-13	2.11721e-11	0.205287	0.250267	0.627656
ENSMUSG00000029204.8	MGI:1921984	Rhoh	ras homolog family member H	3.28659	1.63254e-14	6.47859e-13	1.25293	0.0058464	0.105687
ENSMUSG00000029217.17	MGI:98662	Tec	tec protein tyrosine kinase	2.75198	1.93573e-14	7.55671e-13	0.619186	0.100724	0.428708
ENSMUSG00000029219.11	MGI:3606480	Slc10a4	solute carrier family 10 (sodium/bile acid cotransporter family), member 4	1.9052	5.68597e-05	0.000248281	1.03284	0.0457827	0.301661
ENSMUSG00000029231.16	MGI:97530	Pdgfra	platelet derived growth factor receptor, alpha polypeptide	0.754621	0.000479563	0.00168385	0.0111245	0.959029	0.989676
ENSMUSG00000029233.16	MGI:1930252	Srd5a3	steroid 5 alpha-reductase 3	0.591471	6.61673e-08	5.78808e-07	0.111828	0.320439	0.688669
ENSMUSG00000029249.16	MGI:104897	Rest	RE1-silencing transcription factor	1.23968	3.66703e-10	5.54454e-09	0.374977	0.0647417	0.352228
ENSMUSG00000029298.16	MGI:3605620	Gbp9	guanylate-binding protein 9	2.23456	1.36805e-15	7.44046e-14	0.809664	0.00475986	0.0936695
ENSMUSG00000029299.15	MGI:1351624	Abcg3	ATP binding cassette subfamily G member 3	2.23879	0.000254015	0.000948437	-0.547276	0.386522	0.735429
ENSMUSG00000029304.15	MGI:98389	Spp1	secreted phosphoprotein 1	7.7252	8.53461e-21	3.0644e-18	0.748461	0.369508	0.725244
ENSMUSG00000029313.19	MGI:1100819	Aff1	AF4/FMR2 family, member 1	0.650473	1.09421e-05	5.64389e-05	0.0601578	0.687623	0.901867
ENSMUSG00000029322.13	MGI:2445289	Plac8	placenta-specific 8	4.75863	1.15823e-05	5.94427e-05	1.45022	0.20979	0.584689
ENSMUSG00000029338.14	MGI:1919164	Antxr2	anthrax toxin receptor 2	1.63893	1.10585e-06	7.22771e-06	0.38457	0.264823	0.64143
ENSMUSG00000029343.18	MGI:104992	Crybb1	crystallin, beta B1	2.11748	5.83447e-07	4.06942e-06	0.67075	0.118812	0.457683
ENSMUSG00000029373.8	MGI:1888711	Pf4	platelet factor 4	1.95398	0.000167894	0.000653298	0.362897	0.54491	0.833525
ENSMUSG00000029378.6	MGI:88068	Areg	amphiregulin	4.09554	0.000103299	0.000422884	-0.174163	0.903285	0.974314
ENSMUSG00000029381.17	MGI:1351655	Shroom3	shroom family member 3	2.3752	6.60145e-14	2.30219e-12	0.780261	0.0174029	0.191947
ENSMUSG00000029394.12	MGI:1202069	Cdk2ap1	CDK2 (cyclin-dependent kinase 2)-associated protein 1	0.670427	1.67448e-08	1.66816e-07	0.276553	0.0218814	0.213514
ENSMUSG00000029414.12	MGI:2673709	Kntc1	kinetochore associated 1	1.01444	5.0743e-05	0.000223949	-0.159894	0.537874	0.830401
ENSMUSG00000029416.18	MGI:2140796	Slc15a4	solute carrier family 15, member 4	0.606825	1.49447e-07	1.20576e-06	0.0116152	0.92198	0.979782
ENSMUSG00000029426.9	MGI:1196458	Scarb2	scavenger receptor class B, member 2	1.06823	9.20792e-15	3.93058e-13	0.300648	0.0295917	0.249201
ENSMUSG00000029446.15	MGI:97788	Psph	phosphoserine phosphatase	0.651077	2.51872e-13	7.6928e-12	0.0556348	0.550227	0.836165
ENSMUSG00000029468.18	MGI:1339957	P2rx7	purinergic receptor P2X, ligand-gated ion channel, 7	1.85772	5.74797e-12	1.29199e-10	0.268569	0.323446	0.691281
ENSMUSG00000029470.16	MGI:1338859	P2rx4	purinergic receptor P2X, ligand-gated ion channel 4	2.05606	4.39023e-13	1.26819e-11	0.264967	0.35744	0.71824
ENSMUSG00000029484.13	MGI:1201378	Anxa3	annexin A3	2.90556	5.6886e-16	3.41684e-14	0.42019	0.24591	0.623847
ENSMUSG00000029490.5	MGI:2442629	Mfsd7a	major facilitator superfamily domain containing 7A	1.44271	3.44349e-05	0.000158567	0.904734	0.0135725	0.16966
ENSMUSG00000029510.16	MGI:1919201	Gpc2	glypican 2 (cerebroglycan)	0.927118	0.000157392	0.000616433	0.752588	0.00243216	0.06493
ENSMUSG00000029521.8	MGI:1355321	Chek2	checkpoint kinase 2	1.61016	1.11805e-07	9.27817e-07	0.293351	0.355149	0.716714
ENSMUSG00000029545.14	MGI:87868	Acads	acyl-Coenzyme A dehydrogenase, short chain	1.88381	1.61493e-16	1.17927e-14	0.474981	0.0423136	0.291842
ENSMUSG00000029552.20	MGI:105081	Tes	testin LIM domain protein	2.90723	2.86128e-11	5.56983e-10	0.398715	0.380996	0.73189
ENSMUSG00000029553.11	MGI:1333760	Tfec	transcription factor EC	3.95864	0.00181703	0.00553088	0.769488	0.542496
ENSMUSG00000029560.13	MGI:2443816	Snx8	sorting nexin 8	1.40746	4.03384e-10	6.03524e-09	0.47505	0.0388853	0.281038
ENSMUSG00000029569.10	MGI:1921794	Tmem168	transmembrane protein 168	0.621206	6.15671e-08	5.42028e-07	0.108305	0.358642	0.719293
ENSMUSG00000029570.6	MGI:1095413	Lfng	LFNG O-fucosylpeptide 3-beta-N-acetylglucosaminyltransferase	1.32678	1.02165e-07	8.54967e-07	0.105551	0.675727	0.896233
ENSMUSG00000029616.10	MGI:1914647	Erp29	endoplasmic reticulum protein 29	0.986091	2.42762e-14	9.27555e-13	0.160904	0.216186	0.592682
ENSMUSG00000029622.17	MGI:1343142	Arpc1b	actin related protein 2/3 complex, subunit 1B	3.59928	3.08714e-19	6.12553e-17	1.31228	0.00114397	0.0406149
ENSMUSG00000029650.11	MGI:1918956	Slc46a3	solute carrier family 46, member 3	1.31959	2.77894e-09	3.33757e-08	0.339625	0.135636	0.485643
ENSMUSG00000029659.17	MGI:1917967	Medag	mesenteric estrogen dependent adipogenesis	1.27175	0.000638264	0.00218009	0.389853	0.298284	0.671568
ENSMUSG00000029660.11	MGI:1923110	Tex26	testis expressed 26	2.27871	0.00192749	0.00583562	0.906771	0.228942
ENSMUSG00000029661.17	MGI:88468	Col1a2	collagen, type I, alpha 2	2.76136	4.15814e-09	4.82006e-08	1.02976	0.0291083	0.246883
ENSMUSG00000029669.15	MGI:1889818	Tspan12	tetraspanin 12	0.698351	5.42085e-07	3.81167e-06	0.10537	0.457449	0.784114
ENSMUSG00000029675.13	MGI:95317	Eln	elastin	2.02646	8.1509e-06	4.32834e-05	0.505418	0.267828	0.644218
ENSMUSG00000029687.17	MGI:107940	Ezh2	enhancer of zeste 2 polycomb repressive complex 2 subunit	1.05838	9.50526e-08	8.01747e-07	0.333625	0.098004	0.424273
ENSMUSG00000029705.18	MGI:88568	Cux1	cut-like homeobox 1	1.13279	9.38708e-12	2.01699e-10	0.235728	0.159122	0.52049
ENSMUSG00000029710.16	MGI:104757	Ephb4	Eph receptor B4	1.165	2.75484e-07	2.08963e-06	0.360065	0.121181	0.461221
ENSMUSG00000029718.15	MGI:105099	Pcolce	procollagen C-endopeptidase enhancer protein	2.21005	3.30527e-08	3.08155e-07	0.799029	0.0477635	0.307361
ENSMUSG00000029723.17	MGI:1926079	Tsc22d4	TSC22 domain family, member 4	1.38161	9.45496e-17	7.5774e-15	0.507799	0.00236629	0.0637479
ENSMUSG00000029725.11	MGI:1922853	Ppp1r35	protein phosphatase 1, regulatory subunit 35	0.661273	0.000267327	0.000993577	0.335862	0.0790187	0.387109
ENSMUSG00000029730.17	MGI:1298398	Mcm7	minichromosome maintenance complex component 7	0.795428	6.56566e-06	3.55477e-05	0.21793	0.225796	0.602544
ENSMUSG00000029735.18	MGI:1352500	Tpk1	thiamine pyrophosphokinase	0.889335	0.000235817	0.000887236	0.0951445	0.706061	0.907894
ENSMUSG00000029759.10	MGI:106686	Pon3	paraoxonase 3	3.30647	5.00468e-16	3.06361e-14	1.01395	0.0160622	0.183511
ENSMUSG00000029762.7	MGI:107673	Akr1b8	aldo-keto reductase family 1, member B8	3.30277	5.55944e-16	3.36031e-14	1.32188	0.00176849	0.0542172
ENSMUSG00000029767.17	MGI:1097158	Calu	calumenin	1.19131	1.87892e-11	3.79624e-10	0.0353082	0.842669	0.9544
ENSMUSG00000029771.13	MGI:1350924	Irf5	interferon regulatory factor 5	3.1488	1.60831e-18	2.44829e-16	0.804975	0.0282535	0.24316
ENSMUSG00000029781.8	MGI:1350921	Fkbp9	FK506 binding protein 9	1.19517	1.33736e-10	2.23025e-09	0.35568	0.0576653	0.333577
ENSMUSG00000029790.17	MGI:1891414	Cep41	centrosomal protein 41	1.09111	4.57798e-10	6.74414e-09	0.495955	0.00527271	0.0998432
ENSMUSG00000029797.14	MGI:2674311	Sspo	SCO-spondin	1.44876	1.26029e-05	6.41424e-05	0.792023	0.0232029	0.219274
ENSMUSG00000029798.12	MGI:1914388	Herc6	hect domain and RLD 6	2.64239	3.06851e-15	1.50655e-13	1.13697	0.000819265	0.0333396
ENSMUSG00000029810.16	MGI:1916348	Tmem176b	transmembrane protein 176B	2.19716	1.65754e-15	8.7987e-14	0.392618	0.157191	0.518076
ENSMUSG00000029814.11	MGI:1890359	Igf2bp3	insulin-like growth factor 2 mRNA binding protein 3	4.12036	0.000436319	0.00154655	-0.118584	0.913352
ENSMUSG00000029816.11	MGI:1934765	Gpnmb	glycoprotein (transmembrane) nmb	5.23764	1.59633e-17	1.65209e-15	0.461982	0.453447	0.782198
ENSMUSG00000029819.7	MGI:97374	Npy	neuropeptide Y	1.12766	0.00234518	0.00692956	1.03258	0.00535723	0.100816
ENSMUSG00000029826.15	MGI:1926031	Zc3hav1	zinc finger CCCH type, antiviral 1	2.3823	6.84797e-18	7.97664e-16	0.484037	0.0840688	0.3974
ENSMUSG00000029851.6	MGI:2385258	Tcaf2	TRPM8 channel-associated factor 2	2.82637	4.69535e-11	8.69865e-10	0.465627	0.294676	0.668228
ENSMUSG00000029859.7	MGI:107381	Epha1	Eph receptor A1	3.68738	0.000394	0.00141027	0.968075	0.320188
ENSMUSG00000029860.17	MGI:103072	Zyx	zyxin	0.948163	0.000117901	0.000475421	-0.180385	0.465642	0.789416
ENSMUSG00000029915.15	MGI:1345151	Clec5a	C-type lectin domain family 5, member a	3.05091	3.29813e-14	1.22586e-12	0.644631	0.121049	0.460971
ENSMUSG00000029919.6	MGI:1859384	Hpgds	hematopoietic prostaglandin D synthase	2.81616	3.05782e-16	2.03179e-14	0.70823	0.0415858	0.289322
ENSMUSG00000029923.5	MGI:103292	Rab19	RAB19, member RAS oncogene family	4.27393	0.000406856	0.00145159	0.310294	0.763397
ENSMUSG00000029925.14	MGI:98497	Tbxas1	thromboxane A synthase 1, platelet	3.70993	3.92408e-17	3.53534e-15	0.79786	0.0767162	0.382065
ENSMUSG00000029994.18	MGI:88030	Anxa4	annexin A4	2.59715	1.76398e-14	6.95224e-13	0.994264	0.00415305	0.08689
ENSMUSG00000030029.15	MGI:107935	Lrig1	leucine-rich repeats and immunoglobulin-like domains 1	2.21615	3.1762e-15	1.55255e-13	0.600115	0.0335912	0.264022
ENSMUSG00000030047.15	MGI:2443687	Arhgap25	Rho GTPase activating protein 25	2.98948	1.17035e-15	6.50041e-14	0.902023	0.0196945	0.204189
ENSMUSG00000030055.17	MGI:1917084	Rab43	RAB43, member RAS oncogene family	0.722927	1.46239e-09	1.88759e-08	0.171955	0.159058	0.52049
ENSMUSG00000030082.15	MGI:1858417	Sec61a1	Sec61 alpha 1 subunit (S. cerevisiae)	0.738428	1.51699e-11	3.13544e-10	0.095765	0.384843	0.734583
ENSMUSG00000030088.16	MGI:1340024	Aldh1l1	aldehyde dehydrogenase 1 family, member L1	1.629	6.30935e-21	2.5212e-18	0.120026	0.4922	0.806018
ENSMUSG00000030089.16	MGI:1918949	Slc41a3	solute carrier family 41, member 3	1.4285	3.3438e-07	2.4827e-06	0.291827	0.309028	0.679808
ENSMUSG00000030092.15	MGI:1858223	Cntn6	contactin 6	1.41918	0.000107595	0.000438099	0.408532	0.273637	0.648762
ENSMUSG00000030101.16	MGI:1889844	Sumf1	sulfatase modifying factor 1	0.963453	2.96963e-11	5.76514e-10	-0.025814	0.860766	0.96016
ENSMUSG00000030104.10	MGI:2180139	Edem1	ER degradation enhancer, mannosidase alpha-like 1	2.21597	1.25398e-16	9.46933e-15	0.261492	0.332073	0.69874
ENSMUSG00000030111.10	MGI:2449119	A2m	alpha-2-macroglobulin	5.17774	2.57566e-18	3.56271e-16	2.17694	0.000277166	0.016795
ENSMUSG00000030123.16	MGI:2154244	Plxnd1	plexin D1	1.06791	1.17774e-06	7.65583e-06	0.41461	0.0609429	0.342521
ENSMUSG00000030144.5	MGI:1298389	Clec4d	C-type lectin domain family 4, member d	6.34058	0.00167026	0.00513025	-0.903432	0.688498
ENSMUSG00000030149.16	MGI:1196250	Klrk1	killer cell lectin-like receptor subfamily K, member 1	2.82897	0.000754872	0.00253246	2.06968	0.119689
ENSMUSG00000030156.6	MGI:88343	Cd69	CD69 antigen	5.54821	0.00022851	0.000862451	1.81677	0.294285
ENSMUSG00000030157.6	MGI:2135589	Clec2d	C-type lectin domain family 2, member d	1.68663	8.53507e-11	1.49097e-09	0.344035	0.193095	0.565783
ENSMUSG00000030162.15	MGI:1261434	Olr1	oxidized low density lipoprotein (lectin-like) receptor 1	2.85367	0.00199345	0.00601379	4.58619	0.000194499
ENSMUSG00000030168.14	MGI:93830	Adipor2	adiponectin receptor 2	0.997872	2.35813e-10	3.71758e-09	0.0980976	0.535848	0.828946
ENSMUSG00000030170.15	MGI:98959	Wnt5b	wingless-type MMTV integration site family, member 5B	1.40537	1.38994e-05	7.00719e-05	0.432236	0.205635	0.579362
ENSMUSG00000030187.16	MGI:101906	Klra2	killer cell lectin-like receptor, subfamily A, member 2	2.00814	0.00194972	0.00589484	0.0585083	0.935331
ENSMUSG00000030199.17	MGI:109336	Etv6	ets variant 6	1.75003	7.36792e-14	2.53871e-12	0.211701	0.371313	0.726144
ENSMUSG00000030206.14	MGI:1194499	Gsg1	germ cell associated 1	3.89921	3.52537e-07	2.6054e-06	0.40777	0.594252	0.861516
ENSMUSG00000030208.16	MGI:107941	Emp1	epithelial membrane protein 1	3.80334	5.93619e-13	1.663e-11	0.447558	0.407516	0.751228
ENSMUSG00000030214.8	MGI:1914107	Plbd1	phospholipase B domain containing 1	5.01027	2.14098e-07	1.66257e-06	-0.415175	0.732291	0.916236
ENSMUSG00000030218.3	MGI:96976	Mgp	matrix Gla protein	1.85558	5.04451e-05	0.000222874	0.139433	0.761937	0.92573
ENSMUSG00000030220.14	MGI:101940	Arhgdib	Rho, GDP dissociation inhibitor (GDI) beta	3.14502	4.14684e-17	3.70524e-15	0.952696	0.0119642	0.157791
ENSMUSG00000030225.12	MGI:1913762	Dera	deoxyribose-phosphate aldolase (putative)	1.97283	2.26474e-12	5.55489e-11	0.579918	0.0493255	0.311781
ENSMUSG00000030236.11	MGI:1351899	Slco1b2	solute carrier organic anion transporter family, member 1b2	2.00296	0.0010464	0.00338422	0.646115	0.315394	0.685387
ENSMUSG00000030247.10	MGI:1100508	Kcnj8	potassium inwardly-rectifying channel, subfamily J, member 8	0.861052	0.000756003	0.00253597	-0.0361357	0.891651	0.970483
ENSMUSG00000030249.16	MGI:1352630	Abcc9	ATP-binding cassette, sub-family C (CFTR/MRP), member 9	0.873889	0.000125129	0.000502594	0.0174981	0.939467	0.984891
ENSMUSG00000030255.14	MGI:1353511	Sspn	sarcospan	0.624856	6.38263e-05	0.000275356	0.273382	0.0906378	0.409491
ENSMUSG00000030256.12	MGI:1930704	Bhlhe41	basic helix-loop-helix family, member e41	1.07221	9.16075e-10	1.24488e-08	0.593668	0.000731479	0.0310419
ENSMUSG00000030263.14	MGI:108424	Lrmp	lymphoid-restricted membrane protein	2.05453	7.26911e-06	3.90354e-05	0.17872	0.705122	0.907332
ENSMUSG00000030272.16	MGI:1098535	Camk1	calcium/calmodulin-dependent protein kinase I	1.56743	2.93505e-12	7.03118e-11	0.429828	0.0571853	0.332266
ENSMUSG00000030281.17	MGI:2159336	Il17rc	interleukin 17 receptor C	1.77548	1.46556e-13	4.70599e-12	0.352556	0.151485	0.509247
ENSMUSG00000030287.16	MGI:99418	Itpr2	inositol 1,4,5-triphosphate receptor 2	1.61405	7.71346e-15	3.38285e-13	0.208397	0.318761	0.687509
ENSMUSG00000030317.9	MGI:109125	Timp4	tissue inhibitor of metalloproteinase 4	0.850753	1.64149e-09	2.09248e-08	-0.0644521	0.651273	0.885987
ENSMUSG00000030319.9	MGI:1914338	Cand2	cullin-associated and neddylation-dissociated 2 (putative)	1.2418	1.46319e-12	3.75199e-11	0.603498	0.000794009	0.0326175
ENSMUSG00000030339.8	MGI:104875	Ltbr	lymphotoxin B receptor	2.46997	3.13422e-18	4.15551e-16	0.457836	0.11399	0.4488
ENSMUSG00000030341.18	MGI:1314884	Tnfrsf1a	tumor necrosis factor receptor superfamily, member 1a	3.01228	8.94876e-19	1.5145e-16	0.631926	0.0656531	0.354203
ENSMUSG00000030342.9	MGI:88348	Cd9	CD9 antigen	3.41157	3.12827e-22	2.0931e-19	0.767337	0.0295742	0.249201
ENSMUSG00000030345.17	MGI:1330292	Dyrk4	dual-specificity tyrosine-(Y)-phosphorylation regulated kinase 4	3.85675	1.04813e-10	1.78965e-09	1.42319	0.0250116	0.227565
ENSMUSG00000030346.17	MGI:1098224	Rad51ap1	RAD51 associated protein 1	1.59901	1.13021e-09	1.50195e-08	0.430654	0.10789	0.440212
ENSMUSG00000030352.16	MGI:1924558	Tspan9	tetraspanin 9	1.19164	2.49626e-05	0.000118593	0.961095	0.000685691	0.0303392
ENSMUSG00000030353.16	MGI:106907	Tead4	TEA domain family member 4	1.17332	0.000233043	0.000877908	0.400508	0.251118	0.628674
ENSMUSG00000030365.12	MGI:2136650	Clec2i	C-type lectin domain family 2, member i	3.90444	0.000168206	0.000654244	0.245948	0.839318	0.952903
ENSMUSG00000030403.10	MGI:109268	Vasp	vasodilator-stimulated phosphoprotein	1.78069	1.20127e-15	6.64649e-14	0.546754	0.015226	0.179165
ENSMUSG00000030406.8	MGI:1352753	Gipr	gastric inhibitory polypeptide receptor	1.4288	3.36323e-06	1.94148e-05	0.711999	0.0354277	0.270079
ENSMUSG00000030427.18	MGI:1195969	Lilra6	leukocyte immunoglobulin-like receptor, subfamily A (with TM domain), member 6	4.15432	4.61089e-05	0.000205738	2.168	0.099507
ENSMUSG00000030447.16	MGI:1338801	Cyfip1	cytoplasmic FMR1 interacting protein 1	0.776791	1.75403e-11	3.56644e-10	-0.0918094	0.428343	0.765906
ENSMUSG00000030468.13	MGI:2443630	Siglecg	sialic acid binding Ig-like lectin G	2.60742	0.00115766	0.00370491	-0.32324	0.667042
ENSMUSG00000030474.10	MGI:1932475	Siglece	sialic acid binding Ig-like lectin E	1.90564	2.10694e-07	1.63968e-06	0.66942	0.0899394	0.408226
ENSMUSG00000030493.14	MGI:2142208	Faap24	Fanconi anemia core complex associated protein 24	0.745355	2.45534e-06	1.46774e-05	0.104184	0.53017	0.82585
ENSMUSG00000030513.15	MGI:102897	Pcsk6	proprotein convertase subtilisin/kexin type 6	0.940037	2.83797e-10	4.38513e-09	0.404725	0.00733699	0.119562
ENSMUSG00000030522.15	MGI:2142292	Mtmr10	myotubularin related protein 10	0.782378	3.12445e-09	3.72076e-08	0.0291729	0.827984	0.94874
ENSMUSG00000030523.19	MGI:1330305	Trpm1	transient receptor potential cation channel, subfamily M, member 1	3.00229	5.74937e-07	4.01493e-06	2.00133	0.0262181	0.233467
ENSMUSG00000030530.16	MGI:97513	Furin	furin (paired basic amino acid cleaving enzyme)	0.902695	3.15379e-09	3.75259e-08	0.343276	0.025455	0.229885
ENSMUSG00000030536.11	MGI:1352757	Iqgap1	IQ motif containing GTPase activating protein 1	1.59099	1.54842e-12	3.94593e-11	0.425175	0.0597661	0.339009
ENSMUSG00000030538.16	MGI:1344418	Cib1	calcium and integrin binding 1 (calmyrin)	1.17782	2.36368e-13	7.27332e-12	0.200304	0.224395	0.601276
ENSMUSG00000030541.17	MGI:96414	Idh2	isocitrate dehydrogenase 2 (NADP+), mitochondrial	1.0707	4.13662e-11	7.72823e-10	0.191839	0.241746	0.619753
ENSMUSG00000030549.7	MGI:1888517	Rhcg	Rhesus blood group-associated C glycoprotein	3.46839	8.54047e-07	5.74376e-06	1.13855	0.141842	0.495164
ENSMUSG00000030555.17	MGI:1914259	Ttc23	tetratricopeptide repeat domain 23	0.94216	1.58439e-05	7.88525e-05	0.0570036	0.802691	0.940508
ENSMUSG00000030560.18	MGI:109553	Ctsc	cathepsin C	2.76044	1.63105e-16	1.18802e-14	0.666494	0.0484105	0.30931
ENSMUSG00000030562.18	MGI:1354184	Nox4	NADPH oxidase 4	4.01019	4.44967e-07	3.20615e-06	0.839362	0.375362	0.72918
ENSMUSG00000030579.11	MGI:1277211	Tyrobp	TYRO protein tyrosine kinase binding protein	4.06119	7.38671e-23	6.25068e-20	1.17455	0.00457638	0.0918076
ENSMUSG00000030598.16	MGI:1354707	Fbxo17	F-box protein 17	1.50873	2.6246e-08	2.49381e-07	0.303558	0.266525	0.643156
ENSMUSG00000030606.9	MGI:1914916	Hapln3	hyaluronan and proteoglycan link protein 3	1.59646	4.77408e-06	2.66968e-05	0.478535	0.181998	0.552141
ENSMUSG00000030607.8	MGI:99602	Acan	aggrecan	3.52041	5.23475e-09	5.91977e-08	0.00160647	0.997883	0.999733
ENSMUSG00000030613.14	MGI:1913615	Ccdc90b	coiled-coil domain containing 90B	0.741156	7.2847e-09	7.90004e-08	0.0363354	0.781814	0.932907
ENSMUSG00000030641.11	MGI:1921291	Ddias	DNA damage-induced apoptosis suppressor	1.57248	1.37243e-05	6.92982e-05	0.261617	0.50388	0.81265
ENSMUSG00000030649.19	MGI:1922680	Anapc15	anaphase promoting complex C subunit 15	0.79062	7.22048e-07	4.94267e-06	0.0179321	0.91162	0.97686
ENSMUSG00000030671.10	MGI:1333863	Pde3b	phosphodiesterase 3B, cGMP-inhibited	1.87852	1.44764e-14	5.85797e-13	0.231511	0.347849	0.711856
ENSMUSG00000030677.9	MGI:109233	Kif22	kinesin family member 22	2.05372	1.93568e-10	3.12346e-09	0.336741	0.317544	0.686863
ENSMUSG00000030681.19	MGI:1925638	Mvp	major vault protein	1.59046	2.7724e-12	6.66929e-11	0.35485	0.126907	0.470871
ENSMUSG00000030691.16	MGI:2448475	Fchsd2	FCH and double SH3 domains 2	0.740304	4.46313e-07	3.21424e-06	0.102685	0.48688	0.803479
ENSMUSG00000030697.8	MGI:1891763	Ppp4c	protein phosphatase 4, catalytic subunit	0.659054	3.40277e-12	8.0181e-11	0.128722	0.184192	0.554805
ENSMUSG00000030707.16	MGI:1345961	Coro1a	coronin, actin binding protein 1A	0.589321	7.82529e-07	5.31021e-06	0.00675455	0.955077	0.988814
ENSMUSG00000030708.15	MGI:1916637	Dnajb13	DnaJ heat shock protein family (Hsp40) member B13	2.10309	0.000118077	0.000476063	0.597258	0.304958	0.675748
ENSMUSG00000030717.10	MGI:1891834	Nupr1	nuclear protein transcription regulator 1	3.45479	4.04781e-16	2.54278e-14	0.423227	0.33068	0.697798
ENSMUSG00000030720.17	MGI:107537	Cln3	ceroid lipofuscinosis, neuronal 3, juvenile (Batten, Spielmeyer-Vogt disease)	1.16125	2.5484e-09	3.09628e-08	0.15884	0.421978	0.760797
ENSMUSG00000030727.13	MGI:1917564	Rabep2	rabaptin, RAB GTPase binding effector protein 2	0.66475	1.28746e-05	6.54095e-05	0.0806329	0.605066	0.866238
ENSMUSG00000030737.18	MGI:1351872	Slco2b1	solute carrier organic anion transporter family, member 2b1	2.38912	3.59494e-16	2.31906e-14	0.77026	0.00887562	0.13338
ENSMUSG00000030745.10	MGI:1890475	Il21r	interleukin 21 receptor	3.48955	1.15913e-16	8.97831e-15	1.2533	0.00382878	0.083278
ENSMUSG00000030748.10	MGI:105367	Il4ra	interleukin 4 receptor, alpha	3.75165	4.68194e-16	2.88445e-14	0.882158	0.0596444	0.339009
ENSMUSG00000030761.17	MGI:104510	Myo7a	myosin VIIA	0.802743	5.21462e-09	5.89972e-08	0.279287	0.0448388	0.299646
ENSMUSG00000030768.13	MGI:1916147	Disp1	dispatched RND transporter family member 1	0.603433	0.00089872	0.0029622	0.304963	0.100384	0.428523
ENSMUSG00000030782.18	MGI:102784	Tgfb1i1	transforming growth factor beta 1 induced transcript 1	1.85042	3.30529e-08	3.08155e-07	0.496115	0.143701	0.496645
ENSMUSG00000030786.19	MGI:96607	Itgam	integrin alpha M	3.34283	3.02399e-17	2.84324e-15	0.668887	0.0917383	0.411727
ENSMUSG00000030793.5	MGI:1931465	Pycard	PYD and CARD domain containing	3.31289	1.31277e-16	9.83588e-15	1.06346	0.00914792	0.135828
ENSMUSG00000030796.18	MGI:104904	Tead2	TEA domain family member 2	1.22309	3.36533e-06	1.9423e-05	0.912473	0.000551611	0.0263383
ENSMUSG00000030798.16	MGI:88330	Cd37	CD37 antigen	3.65747	5.13431e-23	5.34662e-20	0.95497	0.0110682	0.151335
ENSMUSG00000030804.9	MGI:5439443	Gm21974	predicted gene 21974	0.808369	6.28328e-07	4.35606e-06	0.129717	0.444122	0.776322
ENSMUSG00000030805.15	MGI:893577	Stx4a	syntaxin 4A (placental)	0.665692	5.18774e-08	4.63817e-07	-0.00418807	0.973096	0.992992
ENSMUSG00000030814.18	MGI:1332237	Bcl7c	B cell CLL/lymphoma 7C	0.756854	2.11434e-05	0.000102221	0.333198	0.0641419	0.350943
ENSMUSG00000030824.18	MGI:97388	Nucb1	nucleobindin 1	1.38781	1.95175e-15	1.00815e-13	0.263443	0.133053	0.480563
ENSMUSG00000030830.19	MGI:96606	Itgal	integrin alpha L	3.74024	3.69413e-09	4.33457e-08	0.337147	0.613226	0.869253
ENSMUSG00000030844.12	MGI:1915115	Rgs10	regulator of G-protein signalling 10	2.07537	8.10653e-14	2.7667e-12	0.566902	0.0422365	0.291494
ENSMUSG00000030847.9	MGI:1352493	Bag3	BCL2-associated athanogene 3	2.40783	3.76375e-15	1.79878e-13	0.67286	0.0304625	0.251819
ENSMUSG00000030862.14	MGI:1926006	Cpxm2	carboxypeptidase X 2 (M14 family)	1.35015	0.000498878	0.00174486	0.441747	0.277066	0.652998
ENSMUSG00000030867.8	MGI:97621	Plk1	polo like kinase 1	2.42156	3.2464e-13	9.63904e-12	0.37466	0.277925	0.653766
ENSMUSG00000030894.6	MGI:1336194	Tpp1	tripeptidyl peptidase I	1.23826	1.22604e-14	5.06818e-13	0.173261	0.282158	0.657075
ENSMUSG00000030917.14	MGI:1925752	Tmem159	transmembrane protein 159	1.12285	8.312e-05	0.000348862	0.280839	0.327241	0.694229
ENSMUSG00000030924.17	MGI:1919402	Rexo5	RNA exonuclease 5	2.28398	1.42078e-06	9.04365e-06	0.924026	0.0672932	0.358907
ENSMUSG00000030956.16	MGI:1925188	Fam53b	family with sequence similarity 53, member B	0.698288	0.000210181	0.000799776	0.254711	0.178416	0.548276
ENSMUSG00000030966.14	MGI:106657	Trim21	tripartite motif-containing 21	2.64301	7.0846e-16	4.10123e-14	0.731537	0.0291833	0.247238
ENSMUSG00000030978.11	MGI:98180	Rrm1	ribonucleotide reductase M1	0.939006	2.03357e-09	2.52817e-08	0.0422852	0.790422	0.936478
ENSMUSG00000030990.19	MGI:2385286	Pgap2	post-GPI attachment to proteins 2	0.715522	2.07808e-10	3.32528e-09	0.105335	0.361483	0.720908
ENSMUSG00000031004.9	MGI:106035	Mki67	antigen identified by monoclonal antibody Ki 67	4.20036	3.09296e-21	1.34829e-18	1.34471	0.00269942	0.0686922
ENSMUSG00000031015.9	MGI:1298390	Swap70	SWA-70 protein	1.16542	1.0009e-07	8.38825e-07	0.148215	0.505154	0.813101
ENSMUSG00000031023.6	MGI:3041226	Akip1	A kinase (PRKA) interacting protein 1	1.5633	1.74708e-09	2.20849e-08	-0.0952375	0.723192	0.914595
ENSMUSG00000031070.16	MGI:2384823	Mrgprf	MAS-related GPR, member F	2.53194	4.73652e-05	0.000210788	0.963362	0.200727	0.573987
ENSMUSG00000031074.15	MGI:95517	Fgf3	fibroblast growth factor 3	4.7965	0.000963319	0.00314629	1.76547	0.188457
ENSMUSG00000031077.8	MGI:109324	Fadd	Fas (TNFRSF6)-associated via death domain	1.45382	1.50297e-07	1.2116e-06	0.308723	0.286858	0.661906
ENSMUSG00000031090.15	MGI:1926164	Nadsyn1	NAD synthetase 1	0.815977	1.34361e-06	8.61728e-06	0.478165	0.00601053	0.10725
ENSMUSG00000031093.15	MGI:1923224	Dock11	dedicator of cytokinesis 11	0.704568	0.000640849	0.00218665	-0.553496	0.00797455	0.126282
ENSMUSG00000031097.16	MGI:105070	Tnni2	troponin I, skeletal, fast 2	3.58632	9.71534e-08	8.17071e-07	1.60131	0.0414081	0.288475
ENSMUSG00000031098.19	MGI:1859867	Syt8	synaptotagmin VIII	4.46643	0.000318005	0.00116211	2.21519	0.124882
ENSMUSG00000031101.7	MGI:1921381	Sash3	SAM and SH3 domain containing 3	3.46165	7.06906e-19	1.24775e-16	1.17016	0.0035331	0.0802921
ENSMUSG00000031103.13	MGI:1928377	Elf4	E74-like factor 4 (ets domain transcription factor)	3.60725	6.8293e-17	5.62996e-15	1.06121	0.016968	0.189311
ENSMUSG00000031129.10	MGI:2679732	Slc9a9	solute carrier family 9 (sodium/hydrogen exchanger), member 9	1.04371	2.13851e-09	2.64519e-08	0.2158	0.219648	0.596397
ENSMUSG00000031138.5	MGI:88384	F9	coagulation factor IX	2.64818	1.22146e-06	7.90075e-06	1.4489	0.0210704	0.209922
ENSMUSG00000031145.16	MGI:1859635	Prickle3	prickle planar cell polarity protein 3	1.33941	8.84668e-06	4.65742e-05	0.286984	0.38667	0.735541
ENSMUSG00000031146.7	MGI:1298382	Plp2	proteolipid protein 2	1.9455	1.04966e-11	2.24201e-10	0.487339	0.0947026	0.41809
ENSMUSG00000031158.12	MGI:1343176	Timm17b	translocase of inner mitochondrial membrane 17b	0.597126	1.66763e-07	1.33424e-06	0.119573	0.312826	0.683001
ENSMUSG00000031165.7	MGI:105059	Was	Wiskott-Aldrich syndrome	3.00794	2.35955e-15	1.18891e-13	1.28649	0.00158122	0.0503433
ENSMUSG00000031170.15	MGI:2148066	Slc38a5	solute carrier family 38, member 5	1.54083	1.35903e-05	6.86822e-05	-0.59165	0.100691	0.428708
ENSMUSG00000031207.17	MGI:97167	Msn	moesin	3.07001	2.43408e-19	5.14934e-17	0.642769	0.0605223	0.34122
ENSMUSG00000031212.4	MGI:2676330	Pgr15l	G protein-coupled receptor 15-like	3.54068	0.00169484	0.00519632	0.726195	0.498223	0.810335
ENSMUSG00000031216.14	MGI:2448556	Stard8	START domain containing 8	0.938128	6.72739e-06	3.63413e-05	0.0587612	0.779901	0.932335
ENSMUSG00000031232.18	MGI:1914325	Magt1	magnesium transporter 1	1.1615	9.70565e-08	8.16734e-07	0.147538	0.504859	0.813101
ENSMUSG00000031262.13	MGI:2147897	Cenpi	centromere protein I	2.97397	9.57182e-13	2.56452e-11	1.12478	0.0137123	0.169765
ENSMUSG00000031264.14	MGI:88216	Btk	Bruton agammaglobulinemia tyrosine kinase	3.65824	5.92382e-17	5.07245e-15	0.923137	0.0397709	0.283375
ENSMUSG00000031266.8	MGI:1347344	Gla	galactosidase, alpha	1.64786	2.27968e-10	3.60972e-09	0.140241	0.593996	0.861379
ENSMUSG00000031273.17	MGI:2152695	Col4a6	collagen, type IV, alpha 6	4.19628	1.19401e-16	9.13642e-15	0.835343	0.105269	0.435491
ENSMUSG00000031274.17	MGI:88456	Col4a5	collagen, type IV, alpha 5	2.94861	1.51132e-14	6.07293e-13	0.809118	0.0371968	0.276237
ENSMUSG00000031283.17	MGI:1933172	Chrdl1	chordin-like 1	2.76556	3.31083e-14	1.22752e-12	-0.180908	0.624473	0.874494
ENSMUSG00000031297.15	MGI:1100521	Slc7a3	solute carrier family 7 (cationic amino acid transporter, y+ system), member 3	1.30189	0.00126625	0.00401491	0.721856	0.0751242	0.378901
ENSMUSG00000031304.19	MGI:96551	Il2rg	interleukin 2 receptor, gamma chain	3.72181	5.1657e-15	2.36284e-13	0.994941	0.0455463	0.301141
ENSMUSG00000031320.10	MGI:98158	Rps4x	ribosomal protein S4, X-linked	0.68188	2.51036e-09	3.05394e-08	-0.0128982	0.910474	0.976686
ENSMUSG00000031328.17	MGI:95556	Flna	filamin, alpha	0.817169	2.24417e-06	1.35879e-05	0.266492	0.12365	0.465901
ENSMUSG00000031362.18	MGI:3574099	Xlr4c	X-linked lymphocyte-regulated 4C	2.47378	0.000507897	0.0017736	0.673228	0.347573	0.711572
ENSMUSG00000031365.14	MGI:1350985	Zfp275	zinc finger protein 275	1.45051	1.81912e-06	1.12919e-05	-0.0378204	0.901382	0.973842
ENSMUSG00000031371.15	MGI:1920988	Haus7	HAUS augmin-like complex, subunit 7	0.938526	4.9855e-08	4.47265e-07	0.0702228	0.693615	0.903704
ENSMUSG00000031373.5	MGI:1926249	Car5b	carbonic anhydrase 5b, mitochondrial	1.50487	1.22953e-18	1.94367e-16	0.377427	0.0338602	0.264489
ENSMUSG00000031374.14	MGI:108094	Zfp92	zinc finger protein 92	1.32896	0.00189431	0.00574423	0.0748437	0.862217	0.960426
ENSMUSG00000031375.18	MGI:88158	Bgn	biglycan	3.97496	2.95857e-20	8.96011e-18	1.14718	0.00797552	0.126282
ENSMUSG00000031378.15	MGI:1349215	Abcd1	ATP-binding cassette, sub-family D (ALD), member 1	1.08073	1.54018e-12	3.92841e-11	0.314658	0.043378	0.294648
ENSMUSG00000031382.15	MGI:1916104	Asb11	ankyrin repeat and SOCS box-containing 11	1.96399	0.000766771	0.0025661	-0.893959	0.134199	0.482943
ENSMUSG00000031383.9	MGI:2387107	Dusp9	dual specificity phosphatase 9	2.65995	8.17184e-05	0.000343781	0.821358	0.147938	0.503268
ENSMUSG00000031385.15	MGI:2154240	Plxnb3	plexin B3	1.40878	2.03502e-07	1.59102e-06	0.685734	0.0120485	0.158057
ENSMUSG00000031387.15	MGI:105940	Renbp	renin binding protein	3.13923	1.23505e-15	6.82028e-14	0.772664	0.055582	0.328438
ENSMUSG00000031389.18	MGI:2159577	Arhgap4	Rho GTPase activating protein 4	1.03412	3.83948e-09	4.48086e-08	0.227818	0.202601	0.57539
ENSMUSG00000031400.11	MGI:105979	G6pdx	glucose-6-phosphate dehydrogenase X-linked	0.999349	3.33498e-16	2.1807e-14	0.253201	0.0428384	0.293142
ENSMUSG00000031434.16	MGI:1922996	Morc4	microrchidia 4	0.607003	0.00149568	0.00464963	0.0468663	0.811151	0.943763
ENSMUSG00000031438.12	MGI:1914139	Rnf128	ring finger protein 128	0.833834	0.000229742	0.000866417	-0.0306345	0.892633	0.970823
ENSMUSG00000031444.17	MGI:103107	F10	coagulation factor X	5.53895	2.55496e-05	0.000121022	0.539267	0.743602
ENSMUSG00000031447.8	MGI:96745	Lamp1	lysosomal-associated membrane protein 1	1.58223	1.10667e-15	6.18251e-14	0.368328	0.0623035	0.345959
ENSMUSG00000031451.7	MGI:95660	Gas6	growth arrest specific 6	1.53964	2.11022e-10	3.36921e-09	0.229195	0.345435	0.710508
ENSMUSG00000031453.17	MGI:1197013	Rasa3	RAS p21 protein activator 3	0.847701	1.82724e-09	2.30072e-08	-0.0158061	0.911147	0.976779
ENSMUSG00000031465.7	MGI:1202890	Angpt2	angiopoietin 2	1.61229	0.000269339	0.00100028	0.318917	0.490525	0.804741
ENSMUSG00000031490.7	MGI:103267	Eif4ebp1	eukaryotic translation initiation factor 4E binding protein 1	2.06582	2.13041e-10	3.39579e-09	0.598135	0.0822582	0.394028
ENSMUSG00000031493.11	MGI:2181461	Ggn	gametogenetin	1.61935	8.87463e-08	7.52526e-07	0.735222	0.0351763	0.269275
ENSMUSG00000031494.8	MGI:2157942	Cd209a	CD209a antigen	2.41191	0.0019478	0.00588966	-0.390974	0.662438
ENSMUSG00000031497.11	MGI:1344376	Tnfsf13b	tumor necrosis factor (ligand) superfamily, member 13b	1.69051	2.47968e-06	1.48107e-05	0.924509	0.015006	0.178255
ENSMUSG00000031502.12	MGI:88454	Col4a1	collagen, type IV, alpha 1	1.14633	6.31615e-06	3.4326e-05	0.449549	0.0769803	0.382734
ENSMUSG00000031504.7	MGI:102789	Rab20	RAB20, member RAS oncogene family	3.88721	3.14372e-14	1.17458e-12	1.14487	0.0362034	0.272526
ENSMUSG00000031506.12	MGI:2156893	Ptpn7	protein tyrosine phosphatase, non-receptor type 7	4.69624	4.18076e-06	2.36827e-05	-0.948964	0.479287	0.799166
ENSMUSG00000031521.6	MGI:104873	Aga	aspartylglucosaminidase	1.40114	1.82347e-10	2.96067e-09	0.271286	0.234979	0.612742
ENSMUSG00000031530.7	MGI:2442191	Dusp4	dual specificity phosphatase 4	1.41711	9.62862e-05	0.000397853	0.206733	0.570599	0.847857
ENSMUSG00000031538.7	MGI:97610	Plat	plasminogen activator, tissue	1.12537	6.84778e-09	7.48831e-08	0.440038	0.0239672	0.223219
ENSMUSG00000031548.8	MGI:892014	Sfrp1	secreted frizzled-related protein 1	2.85013	1.18705e-11	2.50387e-10	0.516875	0.226019	0.602688
ENSMUSG00000031553.17	MGI:102518	Adam3	a disintegrin and metallopeptidase domain 3 (cyritestin)	3.65779	5.43487e-06	2.99668e-05	0.685373	0.429405	0.766682
ENSMUSG00000031554.19	MGI:104730	Adam5	a disintegrin and metallopeptidase domain 5	2.37906	0.00216953	0.00647238	0.56662	0.486981
ENSMUSG00000031555.16	MGI:105376	Adam9	a disintegrin and metallopeptidase domain 9 (meltrin gamma)	0.955218	9.73955e-09	1.02606e-07	-0.0860782	0.607156	0.866652
ENSMUSG00000031586.18	MGI:1334446	Rbpms	RNA binding protein gene with multiple splicing	0.880186	0.00109363	0.00352034	0.367838	0.201157	0.574469
ENSMUSG00000031591.15	MGI:1277124	Asah1	N-acylsphingosine amidohydrolase 1	1.68927	1.99009e-15	1.02428e-13	0.169416	0.427677	0.765447
ENSMUSG00000031595.10	MGI:1916047	Pdgfrl	platelet-derived growth factor receptor-like	2.70796	1.19226e-11	2.51301e-10	0.367902	0.372576	0.727259
ENSMUSG00000031596.16	MGI:99828	Slc7a2	solute carrier family 7 (cationic amino acid transporter, y+ system), member 2	1.13324	2.24072e-08	2.16771e-07	-0.0898725	0.659199	0.890113
ENSMUSG00000031608.14	MGI:1349449	Galnt7	polypeptide N-acetylgalactosaminyltransferase 7	0.985684	5.89424e-07	4.10514e-06	0.1988	0.322763	0.690518
ENSMUSG00000031609.4	MGI:1929129	Sap30	sin3 associated polypeptide	1.10398	2.09912e-07	1.63447e-06	0.54215	0.0126404	0.161802
ENSMUSG00000031610.4	MGI:1328308	Scrg1	scrapie responsive gene 1	1.59974	1.09617e-11	2.32925e-10	0.254536	0.282738	0.657375
ENSMUSG00000031613.10	MGI:108085	Hpgd	hydroxyprostaglandin dehydrogenase 15 (NAD)	2.93556	3.2437e-13	9.63904e-12	0.668397	0.101089	0.429094
ENSMUSG00000031616.8	MGI:105923	Ednra	endothelin receptor type A	1.09183	2.48012e-09	3.01842e-08	0.389207	0.036989	0.275872
ENSMUSG00000031628.10	MGI:107739	Casp3	caspase 3	1.36517	6.71916e-14	2.33757e-12	0.347902	0.0590031	0.337163
ENSMUSG00000031636.8	MGI:1859274	Pdlim3	PDZ and LIM domain 3	2.16117	4.24648e-07	3.07437e-06	0.435555	0.335813	0.70129
ENSMUSG00000031639.13	MGI:2156367	Tlr3	toll-like receptor 3	1.53206	7.42854e-21	2.81219e-18	0.428995	0.0101085	0.1431
ENSMUSG00000031640.12	MGI:5804868	Gm45753	predicted gene 45753	1.21808	0.000181618	0.000701479	0.530509	0.163614	0.526463
ENSMUSG00000031647.11	MGI:1918556	Mfap3l	microfibrillar-associated protein 3-like	1.04366	2.27316e-07	1.7562e-06	0.0646336	0.74925	0.921689
ENSMUSG00000031659.14	MGI:102891	Adcy7	adenylate cyclase 7	3.48753	6.02793e-19	1.08393e-16	1.37003	0.000590044	0.0275839
ENSMUSG00000031662.9	MGI:1918857	Snx20	sorting nexin 20	3.47535	1.32671e-12	3.42645e-11	0.911063	0.0777863	0.384062
ENSMUSG00000031665.8	MGI:1889585	Sall1	spalt like transcription factor 1	2.02745	2.7775e-17	2.66371e-15	0.686444	0.00451968	0.0910234
ENSMUSG00000031684.12	MGI:1924025	Slc10a7	solute carrier family 10 (sodium/bile acid cotransporter family), member 7	0.957215	2.24325e-05	0.000107909	0.14991	0.521644	0.821987
ENSMUSG00000031712.11	MGI:103014	Il15	interleukin 15	1.76616	3.61638e-06	2.07471e-05	0.174249	0.665923	0.893088
ENSMUSG00000031714.10	MGI:108088	Gab1	growth factor receptor bound protein 2-associated protein 1	0.916415	2.15983e-07	1.6745e-06	0.474993	0.00783921	0.124793
ENSMUSG00000031740.9	MGI:97009	Mmp2	matrix metallopeptidase 2	3.21962	3.37911e-15	1.63671e-13	1.12421	0.00818295	0.128289
ENSMUSG00000031756.6	MGI:1919405	Cenpn	centromere protein N	2.03352	4.96573e-09	5.6537e-08	0.165562	0.658848	0.890113
ENSMUSG00000031762.8	MGI:97172	Mt2	metallothionein 2	1.88593	3.50408e-12	8.22315e-11	0.454396	0.0943046	0.417084
ENSMUSG00000031765.9	MGI:97171	Mt1	metallothionein 1	1.31843	1.03514e-09	1.38926e-08	0.409242	0.0585081	0.336101
ENSMUSG00000031767.14	MGI:1914778	Nudt7	nudix (nucleoside diphosphate linked moiety X)-type motif 7	1.21492	3.4402e-07	2.54704e-06	0.523557	0.0343207	0.266104
ENSMUSG00000031775.6	MGI:1915051	Pllp	plasma membrane proteolipid	0.995257	7.3293e-06	3.93196e-05	0.417938	0.0611106	0.342574
ENSMUSG00000031779.4	MGI:1306779	Ccl22	chemokine (C-C motif) ligand 22	2.25127	0.000437303	0.00154927	0.3772	0.550213
ENSMUSG00000031785.17	MGI:1340051	Adgrg1	adhesion G protein-coupled receptor G1	1.20982	1.91712e-10	3.09701e-09	0.286686	0.13262	0.480087
ENSMUSG00000031790.9	MGI:109320	Mmp15	matrix metallopeptidase 15	0.869485	1.74078e-05	8.58193e-05	0.413984	0.0437044	0.295049
ENSMUSG00000031792.16	MGI:2142454	Usb1	U6 snRNA biogenesis 1	0.664906	0.000103331	0.000422953	0.255799	0.14983	0.506534
ENSMUSG00000031799.11	MGI:2449202	Tpm4	tropomyosin 4	1.61363	6.37727e-11	1.14604e-09	0.127104	0.609022	0.86692
ENSMUSG00000031803.9	MGI:2152535	B3gnt3	UDP-GlcNAc:betaGal beta-1,3-N-acetylglucosaminyltransferase 3	1.25387	0.000144018	0.000570029	0.621774	0.0788138	0.386732
ENSMUSG00000031805.18	MGI:99928	Jak3	Janus kinase 3	2.77306	1.1746e-13	3.85782e-12	0.726326	0.0542155	0.325277
ENSMUSG00000031807.11	MGI:1913421	Pgls	6-phosphogluconolactonase	0.900195	1.03234e-08	1.08124e-07	0.156769	0.328589	0.695881
ENSMUSG00000031821.12	MGI:1921019	Gins2	GINS complex subunit 2 (Psf2 homolog)	1.57231	7.75113e-09	8.34923e-08	0.22942	0.422155	0.760836
ENSMUSG00000031825.17	MGI:1926142	Crispld2	cysteine-rich secretory protein LCCL domain containing 2	1.74815	5.17781e-06	2.87034e-05	0.718907	0.0646189	0.352165
ENSMUSG00000031827.14	MGI:1919292	Cotl1	coactosin-like 1 (Dictyostelium)	1.56718	2.23696e-09	2.7563e-08	0.327988	0.211643	0.586848
ENSMUSG00000031828.10	MGI:2385305	Klhl36	kelch-like 36	0.692312	3.61776e-08	3.34683e-07	0.259785	0.0545833	0.326064
ENSMUSG00000031838.11	MGI:2137648	Ifi30	interferon gamma inducible protein 30	4.04185	3.68843e-18	4.75874e-16	1.11902	0.0181565	0.196641
ENSMUSG00000031849.10	MGI:88469	Comp	cartilage oligomeric matrix protein	4.16574	8.46643e-08	7.2046e-07	2.35438	0.00470772	0.093186
ENSMUSG00000031851.15	MGI:1913816	Ntpcr	nucleoside-triphosphatase, cancer-related	1.42455	1.92935e-13	6.05153e-12	0.231102	0.239299	0.616539
ENSMUSG00000031871.10	MGI:105057	Cdh5	cadherin 5	1.01467	8.10158e-07	5.47675e-06	0.402228	0.0528861	0.322927
ENSMUSG00000031875.8	MGI:2447162	Cmtm3	CKLF-like MARVEL transmembrane domain containing 3	2.4693	2.07506e-15	1.05675e-13	0.715814	0.0235929	0.221022
ENSMUSG00000031880.8	MGI:1930943	Rrad	Ras-related associated with diabetes	2.85253	2.93645e-09	3.51433e-08	1.04039	0.041334	0.288337
ENSMUSG00000031885.15	MGI:99851	Cbfb	core binding factor beta	1.02425	1.97919e-10	3.18653e-09	-0.309479	0.0577464	0.333892
ENSMUSG00000031887.14	MGI:109200	Tradd	TNFRSF1A-associated via death domain	0.702113	4.24156e-05	0.000191216	0.130614	0.470533	0.793295
ENSMUSG00000031897.10	MGI:1096380	Psmb10	proteasome (prosome, macropain) subunit, beta type 10	1.26741	1.80749e-15	9.48966e-14	0.441815	0.00637656	0.110834
ENSMUSG00000031902.11	MGI:103296	Nfatc3	nuclear factor of activated T cells, cytoplasmic, calcineurin dependent 3	0.765161	2.0738e-07	1.61782e-06	0.0962049	0.522999	0.822418
ENSMUSG00000031903.8	MGI:2178076	Pla2g15	phospholipase A2, group XV	1.77372	2.76414e-13	8.36248e-12	0.368282	0.131905	0.478922
ENSMUSG00000031930.12	MGI:1914144	Wwp2	WW domain containing E3 ubiquitin protein ligase 2	0.597099	6.9106e-06	3.7261e-05	0.0634582	0.636048	0.879543
ENSMUSG00000031938.16	MGI:1918234	4931406C07Rik	RIKEN cDNA 4931406C07 gene	0.890941	2.0468e-11	4.10372e-10	0.233657	0.0839027	0.397087
ENSMUSG00000031952.6	MGI:1931825	Chst5	carbohydrate (N-acetylglucosamine 6-O) sulfotransferase 5	1.05286	0.000553698	0.00191518	0.129578	0.677	0.896408
ENSMUSG00000031963.9	MGI:1920480	Bmper	BMP-binding endothelial regulator	1.59237	2.52516e-08	2.40488e-07	0.66101	0.0239715	0.223219
ENSMUSG00000031967.16	MGI:1928277	Afg3l1	AFG3-like AAA ATPase 1	0.597829	1.03245e-09	1.38677e-08	0.127382	0.201575	0.574682
ENSMUSG00000031990.16	MGI:1933825	Jam3	junction adhesion molecule 3	0.87785	1.31922e-07	1.08248e-06	0.322514	0.0550007	0.327421
ENSMUSG00000031995.10	MGI:1338881	St14	suppression of tumorigenicity 14 (colon carcinoma)	4.12907	2.6093e-15	1.29683e-13	1.12458	0.0420957	0.291004
ENSMUSG00000032000.18	MGI:1197007	Birc3	baculoviral IAP repeat-containing 3	2.27098	7.8065e-13	2.12088e-11	0.610188	0.0645499	0.352165
ENSMUSG00000032014.7	MGI:94852	Oaf	out at first homolog	1.01696	9.44721e-08	7.97552e-07	0.0716881	0.712605	0.910759
ENSMUSG00000032015.17	MGI:102565	Pou2f3	POU domain, class 2, transcription factor 3	1.34574	0.00266349	0.00776327	-0.438613	0.365702	0.723337
ENSMUSG00000032033.12	MGI:109617	Barx2	BarH-like homeobox 2	1.63517	0.0019766	0.00596985	1.75978	0.00266859	0.0681595
ENSMUSG00000032034.7	MGI:104755	Kcnj5	potassium inwardly-rectifying channel, subfamily J, member 5	1.29653	0.00134584	0.00423736	-0.00968059	0.982727	0.996146
ENSMUSG00000032035.17	MGI:95455	Ets1	E26 avian leukemia oncogene 1, 5' domain	0.99367	2.51701e-06	1.50087e-05	-0.0794483	0.70988	0.909095
ENSMUSG00000032041.16	MGI:2152213	Tirap	toll-interleukin 1 receptor (TIR) domain-containing adaptor protein	1.80177	8.44967e-12	1.83337e-10	0.210039	0.445667	0.77718
ENSMUSG00000032058.15	MGI:1920949	Ppp2r1b	protein phosphatase 2, regulatory subunit A, beta	0.748802	4.41261e-07	3.18104e-06	0.185282	0.221509	0.598384
ENSMUSG00000032060.11	MGI:88516	Cryab	crystallin, alpha B	1.06554	6.40501e-09	7.07675e-08	0.269725	0.144692	0.497882
ENSMUSG00000032066.10	MGI:2177469	Bco2	beta-carotene oxygenase 2	1.64498	5.36752e-15	2.4435e-13	0.418015	0.0588881	0.33695
ENSMUSG00000032068.15	MGI:1923759	Plet1	placenta expressed transcript 1	2.0406	0.00100544	0.00326644	1.23121	0.168321
ENSMUSG00000032085.6	MGI:106012	Tagln	transgelin	2.52337	2.12472e-08	2.06731e-07	0.188193	0.677714	0.896792
ENSMUSG00000032089.17	MGI:96538	Il10ra	interleukin 10 receptor, alpha	3.08601	2.27443e-16	1.57302e-14	1.3599	0.000363309	0.0201803
ENSMUSG00000032113.17	MGI:1202065	Chek1	checkpoint kinase 1	0.971101	0.00145423	0.00453736	0.313135	0.334778	0.700863
ENSMUSG00000032116.19	MGI:105124	Stt3a	STT3, subunit of the oligosaccharyltransferase complex, homolog A (S. cerevisiae)	0.765117	6.11277e-08	5.38489e-07	0.0674867	0.635384	0.879543
ENSMUSG00000032122.16	MGI:1929693	Slc37a2	solute carrier family 37 (glycerol-3-phosphate transporter), member 2	3.77008	1.54936e-20	5.18334e-18	0.765757	0.0622277	0.345759
ENSMUSG00000032172.9	MGI:3045350	Olfm2	olfactomedin 2	1.24919	0.00011637	0.000469906	1.06958	0.000979111	0.03719
ENSMUSG00000032179.8	MGI:88181	Bmp5	bone morphogenetic protein 5	1.34451	0.00120684	0.00384731	0.452959	0.279086	0.654256
ENSMUSG00000032181.8	MGI:103032	Scg3	secretogranin III	0.887482	2.15323e-13	6.66725e-12	0.184536	0.127666	0.471875
ENSMUSG00000032194.10	MGI:2384568	Kank2	KN motif and ankyrin repeat domains 2	1.32578	3.73574e-12	8.70291e-11	0.472237	0.0150001	0.178255
ENSMUSG00000032198.10	MGI:1914789	Dock6	dedicator of cytokinesis 6	0.81112	9.57217e-06	4.99639e-05	0.622837	0.000726053	0.0310419
ENSMUSG00000032202.12	MGI:1861441	Rab27a	RAB27A, member RAS oncogene family	1.0074	3.34204e-05	0.00015439	-0.336146	0.172034	0.538107
ENSMUSG00000032204.14	MGI:1891066	Aqp9	aquaporin 9	1.54809	3.9413e-08	3.60901e-07	0.260714	0.364376	0.722285
ENSMUSG00000032218.8	MGI:88311	Ccnb2	cyclin B2	3.53387	6.10412e-15	2.73981e-13	0.910102	0.0622038	0.345759
ENSMUSG00000032220.11	MGI:106621	Myo1e	myosin IE	3.19555	3.49675e-16	2.27521e-14	0.426526	0.281022	0.655834
ENSMUSG00000032221.15	MGI:107933	Mns1	meiosis-specific nuclear structural protein 1	0.761873	0.0001379	0.00054857	0.0716743	0.739073	0.91794
ENSMUSG00000032231.15	MGI:88246	Anxa2	annexin A2	3.65025	2.65612e-15	1.31531e-13	0.989891	0.03375	0.264358
ENSMUSG00000032232.15	MGI:1915428	Cgnl1	cingulin-like 1	0.880888	7.00972e-06	3.7746e-05	0.199512	0.312928	0.683109
ENSMUSG00000032254.11	MGI:1919069	Kif23	kinesin family member 23	2.65556	3.00992e-11	5.83547e-10	1.22642	0.00643928	0.111343
ENSMUSG00000032265.15	MGI:2670964	Tent5a	terminal nucleotidyltransferase 5A	2.57522	1.794e-07	1.42034e-06	0.560743	0.260748	0.637638
ENSMUSG00000032268.14	MGI:1933407	Tmprss5	transmembrane protease, serine 5 (spinesin)	1.94783	1.3559e-05	6.8536e-05	0.602902	0.206595	0.580563
ENSMUSG00000032280.17	MGI:104634	Tle3	transducin-like enhancer of split 3	0.879632	3.80094e-05	0.000173555	0.498921	0.020133	0.206251
ENSMUSG00000032281.12	MGI:2385656	Acsbg1	acyl-CoA synthetase bubblegum family member 1	1.01086	7.42865e-14	2.55657e-12	-0.0517548	0.70268	0.906447
ENSMUSG00000032300.8	MGI:1921461	1700017B05Rik	RIKEN cDNA 1700017B05 gene	1.30244	2.80896e-07	2.12787e-06	0.136193	0.593622	0.861379
ENSMUSG00000032312.8	MGI:88537	Csk	c-src tyrosine kinase	1.55169	2.75905e-14	1.0363e-12	0.389076	0.0588449	0.336818
ENSMUSG00000032314.15	MGI:106092	Etfa	electron transferring flavoprotein, alpha polypeptide	0.738043	4.81014e-13	1.37841e-11	0.120206	0.248259	0.625859
ENSMUSG00000032322.15	MGI:1321396	Pstpip1	proline-serine-threonine phosphatase-interacting protein 1	2.70483	1.44309e-15	7.7606e-14	-0.207006	0.554853	0.838803
ENSMUSG00000032332.18	MGI:88448	Col12a1	collagen, type XII, alpha 1	2.88932	1.09251e-06	7.15997e-06	0.513153	0.38694	0.735541
ENSMUSG00000032334.11	MGI:106096	Loxl1	lysyl oxidase-like 1	2.60064	8.63478e-11	1.50656e-09	1.24755	0.00211885	0.0604096
ENSMUSG00000032338.10	MGI:1298209	Hcn4	hyperpolarization-activated, cyclic nucleotide-gated K+ 4	1.59963	3.54567e-07	2.61906e-06	0.692225	0.0371899	0.276237
ENSMUSG00000032344.18	MGI:2442261	Cgas	cyclic GMP-AMP synthase	1.70275	3.18542e-11	6.14674e-10	-0.0482722	0.860189	0.959828
ENSMUSG00000032349.14	MGI:1916051	Elovl5	ELOVL family member 5, elongation of long chain fatty acids (yeast)	1.06454	1.96829e-21	9.93501e-19	0.226316	0.0451404	0.300046
ENSMUSG00000032353.10	MGI:1913361	Tmed3	transmembrane p24 trafficking protein 3	1.6399	1.30415e-13	4.26384e-12	0.180732	0.418789	0.758793
ENSMUSG00000032359.15	MGI:107285	Ctsh	cathepsin H	3.72589	7.10539e-23	6.19482e-20	1.1906	0.00175246	0.0539508
ENSMUSG00000032369.14	MGI:893575	Plscr1	phospholipid scramblase 1	2.03987	1.24023e-11	2.60837e-10	-0.0449075	0.887474	0.968859
ENSMUSG00000032370.9	MGI:1933395	Lactb	lactamase, beta	0.599727	2.84693e-07	2.1521e-06	0.108371	0.369392	0.725244
ENSMUSG00000032372.15	MGI:1270860	Plscr2	phospholipid scramblase 2	3.96125	7.49554e-20	1.92548e-17	0.744544	0.0993495	0.426647
ENSMUSG00000032374.15	MGI:1347007	Plod2	procollagen lysine, 2-oxoglutarate 5-dioxygenase 2	1.01538	2.48523e-07	1.90319e-06	-0.0868824	0.662322	0.891741
ENSMUSG00000032377.9	MGI:2143267	Plscr4	phospholipid scramblase 4	0.707628	0.000102757	0.000421082	-0.00181059	0.992321	0.99836
ENSMUSG00000032381.6	MGI:1915500	Ciao2a	cytosolic iron-sulfur assembly component 2A	0.847435	9.65518e-09	1.01829e-07	-0.178802	0.236895	0.614492
ENSMUSG00000032382.15	MGI:1928395	Snx1	sorting nexin 1	0.58764	9.46662e-06	4.94668e-05	0.215517	0.105987	0.435727
ENSMUSG00000032383.8	MGI:97750	Ppib	peptidylprolyl isomerase B	0.589639	2.45715e-10	3.85677e-09	0.0294581	0.752844	0.922232
ENSMUSG00000032400.19	MGI:1915264	Zwilch	zwilch kinetochore protein	1.49659	9.93439e-10	1.33812e-08	0.167479	0.506196	0.813781
ENSMUSG00000032412.9	MGI:107788	Atp1b3	ATPase, Na+/K+ transporting, beta 3 polypeptide	1.0533	3.59375e-12	8.3972e-11	0.167622	0.271056	0.647256
ENSMUSG00000032419.9	MGI:1923615	Tbx18	T-box18	1.78144	4.59111e-06	2.57703e-05	0.444985	0.25551	0.632885
ENSMUSG00000032431.7	MGI:1891221	Crtap	cartilage associated protein	1.94253	1.53809e-13	4.9279e-12	0.430822	0.11085	0.443638
ENSMUSG00000032434.10	MGI:2447165	Cmtm6	CKLF-like MARVEL transmembrane domain containing 6	1.6291	1.39795e-13	4.52422e-12	0.224459	0.311287	0.681574
ENSMUSG00000032436.18	MGI:2447166	Cmtm7	CKLF-like MARVEL transmembrane domain containing 7	2.9158	3.89636e-16	2.45838e-14	0.888562	0.0158566	0.183209
ENSMUSG00000032440.14	MGI:98729	Tgfbr2	transforming growth factor, beta receptor II	3.02765	2.14716e-17	2.16758e-15	0.787045	0.0279799	0.241648
ENSMUSG00000032478.15	MGI:1861676	Nme6	NME/NM23 nucleoside diphosphate kinase 6	0.739159	7.19304e-06	3.86535e-05	0.193331	0.253477	0.631123
ENSMUSG00000032487.9	MGI:97798	Ptgs2	prostaglandin-endoperoxide synthase 2	1.04098	0.00303505	0.00872341	0.158346	0.652398	0.886713
ENSMUSG00000032491.15	MGI:1914419	Nradd	neurotrophin receptor associated death domain	1.35406	3.4086e-06	1.9657e-05	0.545877	0.0852231	0.399115
ENSMUSG00000032492.15	MGI:97801	Pth1r	parathyroid hormone 1 receptor	1.43269	2.87883e-10	4.44588e-09	0.607819	0.0101111	0.1431
ENSMUSG00000032494.13	MGI:98658	Tdgf1	teratocarcinoma-derived growth factor 1	1.96011	1.22322e-08	1.2585e-07	0.224289	0.546102	0.83376
ENSMUSG00000032495.9	MGI:1921499	Lrrc2	leucine rich repeat containing 2	0.616799	0.00294569	0.00849629	0.198286	0.350782	0.713956
ENSMUSG00000032501.10	MGI:2443397	Trib1	tribbles pseudokinase 1	2.68753	4.07338e-11	7.62492e-10	0.26363	0.521946	0.822166
ENSMUSG00000032508.9	MGI:108005	Myd88	myeloid differentiation primary response gene 88	1.95537	1.43797e-13	4.62256e-12	0.345335	0.204645	0.577911
ENSMUSG00000032515.9	MGI:2387989	Csrnp1	cysteine-serine-rich nuclear protein 1	1.48614	6.83182e-06	3.68777e-05	0.54105	0.104955	0.434957
ENSMUSG00000032531.16	MGI:1929286	Amotl2	angiomotin-like 2	1.00161	5.03449e-09	5.72293e-08	0.315365	0.0721387	0.371073
ENSMUSG00000032540.17	MGI:1914719	Abhd5	abhydrolase domain containing 5	0.648127	5.1004e-07	3.61437e-06	0.0349523	0.791172	0.936802
ENSMUSG00000032554.16	MGI:98821	Trf	transferrin	2.43914	2.84244e-13	8.5723e-12	0.483103	0.14851	0.503908
ENSMUSG00000032555.11	MGI:1920018	Topbp1	topoisomerase (DNA) II binding protein 1	0.603192	1.74352e-07	1.38703e-06	0.102961	0.381213	0.73189
ENSMUSG00000032556.12	MGI:1333828	Bfsp2	beaded filament structural protein 2, phakinin	2.22516	1.03689e-09	1.39079e-08	0.956463	0.0111104	0.151335
ENSMUSG00000032562.14	MGI:95772	Gnai2	guanine nucleotide binding protein (G protein), alpha inhibiting 2	1.37886	5.63036e-16	3.38893e-14	0.260993	0.126164	0.46982
ENSMUSG00000032575.17	MGI:1922090	Manf	mesencephalic astrocyte-derived neurotrophic factor	0.638207	0.000910912	0.00299655	0.088536	0.647319	0.884341
ENSMUSG00000032577.17	MGI:2143163	Mapkapk3	mitogen-activated protein kinase-activated protein kinase 3	2.78854	2.6777e-15	1.32371e-13	0.735319	0.0439804	0.295781
ENSMUSG00000032590.15	MGI:88041	Apeh	acylpeptide hydrolase	0.589845	5.21776e-05	0.000229682	-0.0139275	0.92562	0.980912
ENSMUSG00000032593.6	MGI:2444854	Amigo3	adhesion molecule with Ig like domain 3	1.0226	1.74952e-06	1.0914e-05	0.163011	0.509556	0.81604
ENSMUSG00000032596.15	MGI:1349462	Uba7	ubiquitin-like modifier activating enzyme 7	3.10494	1.79331e-17	1.82962e-15	1.27662	0.000541514	0.0262045
ENSMUSG00000032602.7	MGI:1928738	Slc25a20	solute carrier family 25 (mitochondrial carnitine/acylcarnitine translocase), member 20	0.604743	1.30167e-07	1.06879e-06	0.132016	0.265076	0.641608
ENSMUSG00000032640.11	MGI:2681120	Chsy1	chondroitin sulfate synthase 1	1.13092	7.96573e-12	1.7415e-10	0.0108041	0.948695	0.987139
ENSMUSG00000032643.13	MGI:1341092	Fhl3	four and a half LIM domains 3	2.27839	1.08755e-07	9.04854e-07	1.29674	0.00511638	0.0980571
ENSMUSG00000032656.15	MGI:2443667	Marchf3	membrane associated ring-CH-type finger 3	1.54075	1.33189e-05	6.74053e-05	0.626625	0.0845847	0.398217
ENSMUSG00000032661.10	MGI:2180850	Oas3	2'-5' oligoadenylate synthetase 3	6.83023	6.41693e-10	9.10812e-09	3.2753	0.00627211	0.109987
ENSMUSG00000032667.18	MGI:106687	Pon2	paraoxonase 2	1.08387	1.24965e-14	5.14359e-13	0.17752	0.210342	0.585597
ENSMUSG00000032673.6	MGI:1915189	Prorsd1	prolyl-tRNA synthetase domain containing 1	1.04664	9.20244e-05	0.000382274	-0.107356	0.70078	0.905863
ENSMUSG00000032690.17	MGI:2180852	Oas2	2'-5' oligoadenylate synthetase 2	4.51236	3.0479e-13	9.15355e-12	2.28267	0.000367001	0.0202782
ENSMUSG00000032691.15	MGI:2653833	Nlrp3	NLR family, pyrin domain containing 3	2.99516	2.05081e-13	6.39262e-12	0.444337	0.303181	0.675161
ENSMUSG00000032698.16	MGI:102811	Lmo2	LIM domain only 2	1.80705	9.15636e-13	2.46434e-11	0.106526	0.676527	0.896375
ENSMUSG00000032702.17	MGI:2147707	Kank1	KN motif and ankyrin repeat domains 1	1.15044	4.77797e-08	4.30257e-07	0.360034	0.0909292	0.409518
ENSMUSG00000032712.17	MGI:1914496	Resf1	retroelement silencing factor 1	0.901116	4.21622e-09	4.88149e-08	0.200641	0.200528	0.573655
ENSMUSG00000032714.7	MGI:1918959	Syde1	synapse defective 1, Rho GTPase, homolog 1 (C. elegans)	0.611743	5.55945e-05	0.000243383	0.073976	0.640629	0.881551
ENSMUSG00000032715.10	MGI:1345675	Trib3	tribbles pseudokinase 3	1.58863	0.000935792	0.00306858	0.258842	0.62002	0.87248
ENSMUSG00000032717.15	MGI:107687	Mdfi	MyoD family inhibitor	4.39037	4.20609e-11	7.84782e-10	0.926572	0.170438	0.535712
ENSMUSG00000032724.6	MGI:2139365	Abtb2	ankyrin repeat and BTB (POZ) domain containing 2	1.00767	5.88795e-11	1.06744e-09	0.208582	0.189829	0.562102
ENSMUSG00000032725.11	MGI:95569	Folr2	folate receptor 2 (fetal)	6.51421	3.27831e-13	9.70622e-12	1.75652	0.0494143	0.31184
ENSMUSG00000032733.7	MGI:2443239	Snx33	sorting nexin 33	1.4372	2.56611e-10	4.01465e-09	0.480338	0.039126	0.281257
ENSMUSG00000032737.14	MGI:1333787	Inppl1	inositol polyphosphate phosphatase-like 1	1.60186	6.13573e-13	1.71389e-11	0.485106	0.0303132	0.251659
ENSMUSG00000032739.17	MGI:3576625	Pram1	PML-RAR alpha-regulated adaptor molecule 1	2.04165	1.54158e-06	9.72647e-06	0.509281	0.279666	0.654748
ENSMUSG00000032744.5	MGI:1860511	Heyl	hairy/enhancer-of-split related with YRPW motif-like	0.846707	0.00110849	0.003565	0.418843	0.114649	0.44926
ENSMUSG00000032754.15	MGI:2180781	Slc8b1	solute carrier family 8 (sodium/lithium/calcium exchanger), member B1	1.03215	2.26863e-06	1.37008e-05	0.387469	0.0822285	0.394028
ENSMUSG00000032766.10	MGI:1913316	Gng11	guanine nucleotide binding protein (G protein), gamma 11	1.21808	1.47537e-09	1.90264e-08	0.147476	0.483255	0.802047
ENSMUSG00000032783.10	MGI:1925983	Troap	trophinin associated protein	3.54167	1.00826e-10	1.72465e-09	0.678622	0.23632	0.614223
ENSMUSG00000032796.9	MGI:99892	Lama1	laminin, alpha 1	1.96187	7.99566e-06	4.25376e-05	0.326971	0.46278	0.787873
ENSMUSG00000032806.14	MGI:95048	Slc10a3	solute carrier family 10 (sodium/bile acid cotransporter family), member 3	1.86365	3.83438e-11	7.25305e-10	0.309372	0.288514	0.663128
ENSMUSG00000032812.19	MGI:1916960	Arap1	ArfGAP with RhoGAP domain, ankyrin repeat and PH domain 1	2.45213	4.69464e-17	4.11797e-15	0.625463	0.0338947	0.264489
ENSMUSG00000032815.17	MGI:1341823	Fanca	Fanconi anemia, complementation group A	2.17558	1.33795e-10	2.23025e-09	1.0039	0.00670669	0.11443
ENSMUSG00000032841.16	MGI:1919696	Prr5l	proline rich 5 like	1.28363	4.06844e-06	2.31011e-05	0.222636	0.435117	0.769564
ENSMUSG00000032854.13	MGI:109522	Ugt8a	UDP galactosyltransferase 8A	1.01522	0.000107309	0.000436997	0.648816	0.0136978	0.169765
ENSMUSG00000032860.6	MGI:105107	P2ry2	purinergic receptor P2Y, G-protein coupled 2	2.12273	1.70487e-07	1.36026e-06	0.543719	0.226934	0.604038
ENSMUSG00000032902.2	MGI:106013	Slc16a1	solute carrier family 16 (monocarboxylic acid transporters), member 1	1.2973	1.27493e-07	1.04743e-06	0.136085	0.580716	0.854593
ENSMUSG00000032911.7	MGI:2153093	Cspg4	chondroitin sulfate proteoglycan 4	1.18946	9.7456e-08	8.19137e-07	0.239344	0.286997	0.661906
ENSMUSG00000033006.11	MGI:98358	Sox10	SRY (sex determining region Y)-box 10	1.58824	1.29265e-09	1.68896e-08	0.588606	0.0255533	0.23037
ENSMUSG00000033007.16	MGI:2652846	Asic4	acid-sensing (proton-gated) ion channel family member 4	1.64235	0.00139265	0.00437089	-0.152734	0.767549	0.927206
ENSMUSG00000033016.17	MGI:102469	Nfatc1	nuclear factor of activated T cells, cytoplasmic, calcineurin dependent 1	2.20347	1.07915e-17	1.18959e-15	0.484019	0.0659711	0.354463
ENSMUSG00000033031.14	MGI:2146335	Cip2a	cell proliferation regulating inhibitor of protein phosphatase 2A	1.14408	3.03655e-07	2.28166e-06	0.15095	0.515143	0.818501
ENSMUSG00000033032.16	MGI:2147199	Afap1l1	actin filament associated protein 1-like 1	1.01619	4.10376e-08	3.73992e-07	0.121097	0.518725	0.820558
ENSMUSG00000033033.11	MGI:1919941	Calhm2	calcium homeostasis modulator family member 2	0.923181	2.36107e-05	0.000112916	0.00333767	0.988279	0.997438
ENSMUSG00000033039.11	MGI:105870	Micall1	microtubule associated monooxygenase, calponin and LIM domain containing -like 1	0.80333	1.5291e-12	3.90361e-11	0.161751	0.157455	0.518318
ENSMUSG00000033053.5	MGI:1914733	1700028P14Rik	RIKEN cDNA 1700028P14 gene	1.43268	0.000258922	0.000965331	0.736923	0.0730453	0.37368
ENSMUSG00000033055.13	MGI:2444209	Ankrd54	ankyrin repeat domain 54	0.914519	6.7088e-10	9.47683e-09	0.288793	0.0571156	0.332259
ENSMUSG00000033083.17	MGI:2429660	Tbc1d4	TBC1 domain family, member 4	0.96124	0.0007335	0.00246738	0.129392	0.653198	0.886761
ENSMUSG00000033088.20	MGI:1349410	Triobp	TRIO and F-actin binding protein	1.48602	1.93087e-13	6.05153e-12	0.581569	0.00527652	0.0998432
ENSMUSG00000033114.12	MGI:1917734	Slc35d2	solute carrier family 35, member D2	2.19051	4.89299e-09	5.58258e-08	0.509292	0.213662	0.589833
ENSMUSG00000033191.15	MGI:99906	Tie1	tyrosine kinase with immunoglobulin-like and EGF-like domains 1	0.879155	1.10553e-05	5.69615e-05	0.370842	0.0664457	0.35628
ENSMUSG00000033192.6	MGI:3606214	Lpcat2	lysophosphatidylcholine acyltransferase 2	2.63567	5.58996e-18	6.7012e-16	0.793547	0.00996985	0.142167
ENSMUSG00000033207.8	MGI:1918988	Mamdc2	MAM domain containing 2	3.37403	8.22853e-17	6.66882e-15	1.0444	0.0136817	0.169765
ENSMUSG00000033208.8	MGI:98217	S100b	S100 protein, beta polypeptide, neural	0.791809	6.23682e-10	8.86559e-09	0.28576	0.0262041	0.233467
ENSMUSG00000033209.18	MGI:2140873	Ttc28	tetratricopeptide repeat domain 28	0.93019	2.52437e-08	2.40488e-07	0.564656	0.00078421	0.0324083
ENSMUSG00000033213.17	MGI:3034182	AA467197	expressed sequence AA467197	3.75791	2.91515e-10	4.49955e-09	-0.56439	0.367054	0.724398
ENSMUSG00000033220.8	MGI:97846	Rac2	Rac family small GTPase 2	4.02269	5.14626e-20	1.42368e-17	1.46542	0.00109301	0.0394982
ENSMUSG00000033222.17	MGI:1921294	Ttf2	transcription termination factor, RNA polymerase II	2.25731	1.84063e-15	9.61681e-14	0.60196	0.0394519	0.28227
ENSMUSG00000033276.19	MGI:1920831	Stk36	serine/threonine kinase 36	0.846835	0.000103571	0.000423781	0.747357	0.000895931	0.0351283
ENSMUSG00000033295.15	MGI:102695	Ptprf	protein tyrosine phosphatase, receptor type, F	1.22114	5.24327e-07	3.70285e-06	0.634887	0.00920546	0.13606
ENSMUSG00000033306.16	MGI:2441849	Lpp	LIM domain containing preferred translocation partner in lipoma	0.975297	3.01151e-08	2.82505e-07	-0.232424	0.193163	0.565824
ENSMUSG00000033313.12	MGI:1354697	Fbxl8	F-box and leucine-rich repeat protein 8	1.65635	2.2195e-06	1.3455e-05	0.300403	0.458778	0.785077
ENSMUSG00000033318.8	MGI:106188	Gstt2	glutathione S-transferase, theta 2	0.998011	4.35278e-05	0.000195678	0.443684	0.0844914	0.398217
ENSMUSG00000033335.18	MGI:109547	Dnm2	dynamin 2	1.15133	2.40987e-11	4.7751e-10	0.225779	0.192337	0.564848
ENSMUSG00000033350.8	MGI:1891160	Chst2	carbohydrate sulfotransferase 2	0.62001	1.69371e-05	8.36992e-05	0.0914026	0.526895	0.824276
ENSMUSG00000033386.11	MGI:108076	Frrs1	ferric-chelate reductase 1	2.72752	1.25662e-14	5.1649e-13	0.40485	0.264198	0.640848
ENSMUSG00000033420.13	MGI:1916788	Antxr1	anthrax toxin receptor 1	1.16183	1.4883e-09	1.9176e-08	0.327223	0.095318	0.419411
ENSMUSG00000033446.8	MGI:1914418	Lpar6	lysophosphatidic acid receptor 6	1.15207	2.31137e-06	1.39239e-05	-0.138488	0.580538	0.854453
ENSMUSG00000033450.9	MGI:3615484	Tagap	T cell activation Rho GTPase activating protein	0.742662	1.91242e-06	1.17871e-05	0.140885	0.377352	0.730334
ENSMUSG00000033467.13	MGI:1889506	Crlf2	cytokine receptor-like factor 2	1.3192	4.71554e-09	5.40091e-08	0.538071	0.0216239	0.212466
ENSMUSG00000033487.15	MGI:1196463	Fndc3a	fibronectin type III domain containing 3A	0.609499	3.56544e-14	1.31346e-12	0.304512	0.000171761	0.0121129
ENSMUSG00000033502.16	MGI:2442676	Cdc14a	CDC14 cell division cycle 14A	0.988551	4.15821e-07	3.01806e-06	-0.126355	0.540419	0.831449
ENSMUSG00000033538.14	MGI:107700	Casp4	caspase 4, apoptosis-related cysteine peptidase	3.40043	1.24156e-09	1.63035e-08	1.30906	0.0296018	0.249201
ENSMUSG00000033542.14	MGI:1858952	Arhgef5	Rho guanine nucleotide exchange factor (GEF) 5	1.49936	1.60125e-10	2.63254e-09	0.737184	0.00231659	0.0629107
ENSMUSG00000033581.18	MGI:1890358	Igf2bp2	insulin-like growth factor 2 mRNA binding protein 2	2.7453	6.31598e-08	5.5537e-07	0.874944	0.105492	0.435491
ENSMUSG00000033589.5	MGI:1919799	Reep4	receptor accessory protein 4	1.74029	4.07584e-09	4.73228e-08	0.417005	0.184112	0.554646
ENSMUSG00000033684.15	MGI:1330818	Qsox1	quiescin Q6 sulfhydryl oxidase 1	0.655175	1.37627e-07	1.12077e-06	0.161663	0.198688	0.572156
ENSMUSG00000033685.14	MGI:109354	Ucp2	uncoupling protein 2 (mitochondrial, proton carrier)	3.51751	3.74121e-19	7.15315e-17	0.434911	0.270633	0.646633
ENSMUSG00000033705.18	MGI:3045258	Stard9	START domain containing 9	0.85102	2.36592e-06	1.42019e-05	0.19971	0.271106	0.647256
ENSMUSG00000033722.10	MGI:2672904	BC034090	cDNA sequence BC034090	1.36542	3.52156e-08	3.26624e-07	0.649124	0.00998938	0.142254
ENSMUSG00000033763.15	MGI:3039591	Mtss2	MTSS I-BAR domain containing 2	0.795528	2.29046e-09	2.81499e-08	0.238826	0.0732689	0.374075
ENSMUSG00000033777.5	MGI:3045213	Tlr13	toll-like receptor 13	3.65965	1.6072e-16	1.17859e-14	0.585091	0.194403	0.566684
ENSMUSG00000033788.16	MGI:1349385	Dysf	dysferlin	1.5925	7.68248e-10	1.06882e-08	0.553866	0.0388199	0.280958
ENSMUSG00000033792.13	MGI:99400	Atp7a	ATPase, Cu++ transporting, alpha polypeptide	1.30148	7.86655e-09	8.46404e-08	0.243391	0.293448	0.666979
ENSMUSG00000033855.16	MGI:1924307	Ston1	stonin 1	0.613575	0.00075142	0.00252206	-0.254835	0.182063	0.552174
ENSMUSG00000033857.13	MGI:2443788	Engase	endo-beta-N-acetylglucosaminidase	0.766991	1.90172e-05	9.28905e-05	0.156478	0.392687	0.74054
ENSMUSG00000033885.16	MGI:1289230	Pxk	PX domain containing serine/threonine kinase	0.61754	4.06809e-05	0.000184325	0.0875894	0.564103	0.844397
ENSMUSG00000033898.18	MGI:3611575	Cfhr2	complement factor H-related 2	2.1734	5.34369e-07	3.7673e-06	0.444759	0.324931	0.692527
ENSMUSG00000033952.15	MGI:1334448	Aspm	abnormal spindle microtubule assembly	3.65322	5.71492e-18	6.79438e-16	1.04551	0.0141269	0.1727
ENSMUSG00000033965.11	MGI:1203732	Slc16a2	solute carrier family 16 (monocarboxylic acid transporters), member 2	0.619683	1.45713e-07	1.17866e-06	-0.046537	0.694163	0.903869
ENSMUSG00000033970.16	MGI:1916513	Rfc3	replication factor C (activator 1) 3	0.801406	4.5701e-06	2.56759e-05	0.255052	0.154847	0.515151
ENSMUSG00000033985.18	MGI:2385204	Tesk2	testis-specific kinase 2	0.862471	1.42744e-06	9.08202e-06	0.299609	0.109325	0.441638
ENSMUSG00000034000.16	MGI:2661364	Neu4	sialidase 4	1.44015	8.97634e-10	1.22224e-08	-0.213958	0.374069	0.728244
ENSMUSG00000034041.6	MGI:96891	Lyl1	lymphoblastomic leukemia 1	2.84711	1.40562e-13	4.54394e-12	1.05809	0.00898011	0.134558
ENSMUSG00000034101.15	MGI:105100	Ctnnd1	catenin (cadherin associated protein), delta 1	0.585751	1.12759e-07	9.34923e-07	0.0348099	0.754417	0.922375
ENSMUSG00000034107.11	MGI:3052714	Ano7	anoctamin 7	2.91557	9.47121e-06	4.94818e-05	2.2789	0.00217579	0.0609191
ENSMUSG00000034109.16	MGI:1920374	Golim4	golgi integral membrane protein 4	0.65207	2.58567e-07	1.97066e-06	0.177345	0.166321	0.530988
ENSMUSG00000034116.18	MGI:98923	Vav1	vav 1 oncogene	3.49916	1.83376e-18	2.69179e-16	1.05432	0.00923206	0.136199
ENSMUSG00000034121.13	MGI:3584243	Mks1	MKS transition zone complex subunit 1	1.01833	2.95414e-07	2.22555e-06	0.460254	0.0232455	0.219325
ENSMUSG00000034161.9	MGI:102934	Scx	scleraxis	2.41866	0.000313051	0.00114561	1.21776	0.113114	0.447174
ENSMUSG00000034164.18	MGI:2155091	Emid1	EMI domain containing 1	2.97536	1.39589e-12	3.59222e-11	0.772834	0.0686364	0.361864
ENSMUSG00000034165.17	MGI:88315	Ccnd3	cyclin D3	1.24217	3.32214e-12	7.85384e-11	0.134241	0.45843	0.784865
ENSMUSG00000034177.16	MGI:2442609	Rnf43	ring finger protein 43	0.741866	0.00143848	0.00449717	0.237354	0.345852	0.710553
ENSMUSG00000034205.17	MGI:2137913	Loxl2	lysyl oxidase-like 2	5.0783	6.72204e-12	1.48769e-10	1.43116	0.053547	0.324375
ENSMUSG00000034210.15	MGI:2442397	Efcab14	EF-hand calcium binding domain 14	0.725398	1.59925e-08	1.60042e-07	0.100482	0.437397	0.771625
ENSMUSG00000034227.8	MGI:1347474	Foxj1	forkhead box J1	1.65561	5.66748e-07	3.96448e-06	0.999472	0.00391359	0.0846699
ENSMUSG00000034255.19	MGI:1916903	Arhgap27	Rho GTPase activating protein 27	0.764816	5.29177e-06	2.92787e-05	0.0293292	0.863469	0.960686
ENSMUSG00000034258.5	MGI:2384974	Flvcr2	feline leukemia virus subgroup C cellular receptor 2	0.733306	0.00040708	0.00145221	0.277032	0.188834	0.560627
ENSMUSG00000034266.7	MGI:1859147	Batf	basic leucine zipper transcription factor, ATF-like	4.09824	8.41741e-07	5.66895e-06	0.879666	0.316106	0.685526
ENSMUSG00000034275.19	MGI:2685354	Igsf9b	immunoglobulin superfamily, member 9B	1.16412	6.59134e-05	0.00028334	0.576416	0.0485783	0.309746
ENSMUSG00000034290.10	MGI:2387995	Nek9	NIMA (never in mitosis gene a)-related expressed kinase 9	0.687253	3.88659e-14	1.41546e-12	0.0359537	0.695128	0.904647
ENSMUSG00000034311.4	MGI:108389	Kif4	kinesin family member 4	2.84894	1.668e-11	3.40739e-10	0.707564	0.107927	0.440212
ENSMUSG00000034320.15	MGI:892977	Slc26a2	solute carrier family 26 (sulfate transporter), member 2	0.652858	6.5055e-07	4.49387e-06	-0.123189	0.360073	0.720179
ENSMUSG00000034329.17	MGI:2442836	Brip1	BRCA1 interacting protein C-terminal helicase 1	3.93179	4.89138e-11	9.04433e-10	1.55541	0.0139139	0.171031
ENSMUSG00000034330.11	MGI:97616	Plcg2	phospholipase C, gamma 2	2.3725	4.06696e-15	1.90926e-13	-0.00281104	0.992678	0.998512
ENSMUSG00000034349.15	MGI:1917349	Smc4	structural maintenance of chromosomes 4	1.35535	3.01792e-12	7.19376e-11	-0.0262625	0.894062	0.971498
ENSMUSG00000034382.15	MGI:2146908	AI661453	expressed sequence AI661453	1.27838	0.00332918	0.0094648	1.19095	0.0217396	0.212862
ENSMUSG00000034394.15	MGI:96787	Lif	leukemia inhibitory factor	2.86607	7.2038e-08	6.24843e-07	0.292055	0.59619	0.862076
ENSMUSG00000034401.17	MGI:1915196	Spata6	spermatogenesis associated 6	1.87459	2.49506e-11	4.9337e-10	0.732288	0.012402	0.160365
ENSMUSG00000034412.14	MGI:2144164	Tbc1d10a	TBC1 domain family, member 10a	0.637575	2.46269e-10	3.86337e-09	0.18677	0.0706357	0.367881
ENSMUSG00000034438.17	MGI:1923324	Gbp8	guanylate-binding protein 8	2.19126	9.55832e-06	4.99097e-05	0.95394	0.0791076	0.387163
ENSMUSG00000034445.9	MGI:2686925	Cyb561a3	cytochrome b561 family, member A3	1.13865	1.2815e-13	4.19455e-12	0.256305	0.101172	0.429221
ENSMUSG00000034449.8	MGI:2652816	Dhrs11	dehydrogenase/reductase (SDR family) member 11	1.11908	0.000351429	0.00127182	0.282542	0.374982	0.728766
ENSMUSG00000034457.11	MGI:2442860	Eda2r	ectodysplasin A2 receptor	2.4189	1.45419e-07	1.17723e-06	1.09162	0.0290781	0.246853
ENSMUSG00000034471.13	MGI:2157062	Caskin2	CASK-interacting protein 2	0.70493	6.18109e-07	4.29038e-06	0.261586	0.0673382	0.358907
[truncated: 2,306 more rows]

## Sheet: EZ_7DN
gene	MGI_ID	GeneSymbol	Description	EZ_7_log2FoldChange	EZ_7_pvalue	EZ_7_padj	PIZ_7_log2FoldChange	PIZ_7_pvalue	PIZ_7_padj
ENSMUSG00000000056.8	MGI:1914858	Narf	nuclear prelamin A recognition factor	-0.778477	3.32319e-11	6.39115e-10	-0.134884	0.246314	0.62419
ENSMUSG00000000197.9	MGI:2444306	Nalcn	sodium leak channel, non-selective	-0.951063	2.01318e-07	1.57652e-06	-0.146464	0.422215	0.760878
ENSMUSG00000000223.14	MGI:107432	Drp2	dystrophin related protein 2	-0.891204	2.91582e-06	1.71067e-05	-0.018893	0.920775	0.979407
ENSMUSG00000000308.15	MGI:99441	Ckmt1	creatine kinase, mitochondrial 1, ubiquitous	-0.847353	2.6379e-07	2.00568e-06	0.00485487	0.976411	0.993681
ENSMUSG00000000402.3	MGI:1858599	Egfl6	EGF-like-domain, multiple 6	-1.14876	0.00026501	0.000985984	-0.479602	0.119471	0.459195
ENSMUSG00000000560.10	MGI:95614	Gabra2	gamma-aminobutyric acid (GABA) A receptor, subunit alpha 2	-0.830536	3.76416e-05	0.000172149	0.0320219	0.87346	0.964546
ENSMUSG00000000632.14	MGI:104745	Sez6	seizure related gene 6	-0.748906	0.00349512	0.00989063	0.372549	0.145938	0.499811
ENSMUSG00000000766.19	MGI:97441	Oprm1	opioid receptor, mu 1	-2.42715	0.00131986	0.00416379	0.0741843	0.898281	0.973175
ENSMUSG00000000805.19	MGI:1096574	Car4	carbonic anhydrase 4	-1.42962	1.65124e-11	3.3783e-10	-0.397988	0.0577921	0.333892
ENSMUSG00000000861.16	MGI:106190	Bcl11a	B cell CLL/lymphoma 11A (zinc finger protein)	-1.6222	2.5743e-10	4.02528e-09	-0.184951	0.469712	0.792686
ENSMUSG00000000948.17	MGI:5613898	Gm38393	predicted gene, 38393	-1.20387	2.01311e-13	6.29556e-12	-0.128332	0.431856	0.768202
ENSMUSG00000001014.7	MGI:1925619	Icam4	intercellular adhesion molecule 4, Landsteiner-Wiener blood group	-1.8083	0.000323856	0.00118185	-0.818253	0.0816951	0.393236
ENSMUSG00000001036.18	MGI:1333766	Epn2	epsin 2	-0.62028	1.07988e-06	7.08694e-06	-0.253234	0.0463338	0.303838
ENSMUSG00000001089.15	MGI:107629	Luzp1	leucine zipper protein 1	-0.814833	5.24321e-12	1.18316e-10	-0.27035	0.0217178	0.212862
ENSMUSG00000001103.8	MGI:108012	Sebox	SEBOX homeobox	-3.60805	6.56204e-14	2.29122e-12	-0.8518	0.0528682	0.322913
ENSMUSG00000001175.17	MGI:88251	Calm1	calmodulin 1	-0.871075	9.73867e-09	1.02606e-07	-0.175425	0.248038	0.625636
ENSMUSG00000001227.13	MGI:1202889	Sema6b	sema domain, transmembrane domain (TM), and cytoplasmic domain, (semaphorin) 6B	-0.600453	0.000299324	0.00110027	0.1708	0.302663	0.675161
ENSMUSG00000001334.10	MGI:1917614	Fndc5	fibronectin type III domain containing 5	-1.61564	5.9699e-12	1.33874e-10	-0.457675	0.0505549	0.315168
ENSMUSG00000001366.15	MGI:1918788	Fbxo9	f-box protein 9	-0.623167	4.63775e-10	6.80566e-09	-0.0879405	0.37714	0.730291
ENSMUSG00000001383.10	MGI:1913742	Zmat2	zinc finger, matrin type 2	-0.599876	1.28831e-08	1.31908e-07	-0.217961	0.0384897	0.279812
ENSMUSG00000001763.15	MGI:1919012	Tspan33	tetraspanin 33	-0.62841	0.00166495	0.00511614	-0.368372	0.0640703	0.350884
ENSMUSG00000001774.9	MGI:1914167	Chordc1	cysteine and histidine-rich domain (CHORD)-containing, zinc-binding protein 1	-0.635779	4.82546e-09	5.50926e-08	-0.162328	0.132604	0.480087
ENSMUSG00000001985.10	MGI:95816	Grik3	glutamate receptor, ionotropic, kainate 3	-0.891317	0.000101416	0.000416654	-0.462462	0.0431908	0.294161
ENSMUSG00000001986.17	MGI:95810	Gria3	glutamate receptor, ionotropic, AMPA3 (alpha 3)	-1.03048	1.86886e-10	3.02583e-09	-0.265849	0.0997596	0.427485
ENSMUSG00000001988.10	MGI:109205	Npas1	neuronal PAS domain protein 1	-0.944285	0.000168303	0.000654536	0.574588	0.0188156	0.19989
ENSMUSG00000002006.13	MGI:2443483	Pdzd4	PDZ domain containing 4	-0.824159	7.11086e-08	6.18087e-07	-0.0790382	0.604339	0.866218
ENSMUSG00000002012.14	MGI:1347357	Pnck	pregnancy upregulated non-ubiquitously expressed CaM kinase	-1.50544	2.41197e-06	1.44422e-05	-0.265746	0.403438	0.747986
ENSMUSG00000002028.14	MGI:96995	Kmt2a	lysine (K)-specific methyltransferase 2A	-0.722419	2.98532e-06	1.74504e-05	-0.154055	0.3187	0.687509
ENSMUSG00000002032.18	MGI:1918937	Tmem25	transmembrane protein 25	-0.81117	1.32854e-07	1.08837e-06	-0.0955507	0.532337	0.826562
ENSMUSG00000002107.19	MGI:1338822	Celf2	CUGBP, Elav-like family member 2	-0.832228	1.37309e-07	1.11976e-06	-0.240745	0.127341	0.471381
ENSMUSG00000002222.15	MGI:1915727	Rmnd5a	required for meiotic nuclear division 5 homolog A	-0.703542	1.79177e-06	1.11389e-05	-0.262627	0.0743454	0.377022
ENSMUSG00000002265.18	MGI:104748	Peg3	paternally expressed 3	-0.926041	2.2142e-08	2.14422e-07	0.0354386	0.830262	0.949613
ENSMUSG00000002266.18	MGI:1341879	Zim1	zinc finger, imprinted 1	-0.900727	1.88365e-07	1.48519e-06	-0.218345	0.190176	0.562577
ENSMUSG00000002413.16	MGI:88190	Braf	Braf transforming gene	-0.821864	5.07467e-13	1.44667e-11	-0.301024	0.0080385	0.12702
ENSMUSG00000002489.17	MGI:103306	Tiam1	T cell lymphoma invasion and metastasis 1	-0.770076	0.0022771	0.00675267	-0.44197	0.079847	0.389226
ENSMUSG00000002578.19	MGI:1343139	Ikzf4	IKAROS family zinc finger 4	-0.620842	0.000228702	0.000863064	-0.105252	0.529182	0.825369
ENSMUSG00000002633.5	MGI:98297	Shh	sonic hedgehog	-1.75147	0.00153008	0.00474475	0.292193	0.464318	0.788868
ENSMUSG00000002771.13	MGI:95823	Grin2d	glutamate receptor, ionotropic, NMDA2D (epsilon 4)	-1.26665	2.32734e-06	1.39966e-05	0.319223	0.219847	0.596629
ENSMUSG00000002808.8	MGI:2145369	Epdr1	ependymin related protein 1 (zebrafish)	-0.684715	1.01308e-06	6.69663e-06	-0.133924	0.338275	0.703834
ENSMUSG00000002957.12	MGI:101920	Ap2a2	adaptor-related protein complex 2, alpha 2 subunit	-0.616092	9.8413e-05	0.000405418	0.137024	0.385883	0.735164
ENSMUSG00000003153.11	MGI:95757	Slc2a3	solute carrier family 2 (facilitated glucose transporter), member 3	-0.816676	2.20504e-06	1.33757e-05	-0.124067	0.471014	0.793299
ENSMUSG00000003273.15	MGI:1336193	Car11	carbonic anhydrase 11	-1.29714	1.342e-07	1.09809e-06	-0.191299	0.43588	0.770571
ENSMUSG00000003279.18	MGI:1346065	Dlgap1	DLG associated protein 1	-1.24876	2.62566e-06	1.55984e-05	-0.34916	0.188873	0.560627
ENSMUSG00000003282.10	MGI:1891916	Plag1	pleiomorphic adenoma gene 1	-1.04252	4.94469e-05	0.000219103	0.000444796	0.998586	0.999822
ENSMUSG00000003352.15	MGI:103307	Cacnb3	calcium channel, voltage-dependent, beta 3 subunit	-0.782276	0.000397389	0.00142117	-0.0558165	0.800337	0.940508
ENSMUSG00000003411.11	MGI:1917158	Rab3b	RAB3B, member RAS oncogene family	-1.1201	1.3907e-06	8.86985e-06	0.345952	0.131426	0.478276
ENSMUSG00000003418.12	MGI:2386797	St8sia6	ST8 alpha-N-acetyl-neuraminide alpha-2,8-sialyltransferase 6	-1.73397	1.56897e-08	1.57559e-07	-0.755096	0.0125356	0.161435
ENSMUSG00000003452.16	MGI:1101760	Bicd1	BICD cargo adaptor 1	-0.943759	1.42261e-08	1.44323e-07	-0.172084	0.298291	0.671568
ENSMUSG00000003469.10	MGI:1860417	Phyhip	phytanoyl-CoA hydroxylase interacting protein	-1.31717	2.90177e-05	0.000135597	-0.319343	0.310637	0.681246
ENSMUSG00000003526.13	MGI:97770	Prodh	proline dehydrogenase	-1.07779	4.94906e-06	2.75668e-05	-0.106431	0.650457	0.885987
ENSMUSG00000003575.14	MGI:2142523	Crtc1	CREB regulated transcription coactivator 1	-1.07697	4.7593e-05	0.000211671	-0.214223	0.418346	0.758376
ENSMUSG00000003863.19	MGI:1924037	Ppfia3	protein tyrosine phosphatase, receptor type, f polypeptide (PTPRF), interacting protein (liprin), alpha 3	-1.00229	3.1344e-11	6.05234e-10	-0.0585709	0.697328	0.904833
ENSMUSG00000003872.10	MGI:1330858	Lin7b	lin-7 homolog B (C. elegans)	-1.19636	5.183e-07	3.66584e-06	-0.0827199	0.727436	0.914908
ENSMUSG00000003929.12	MGI:1890752	Zfp81	zinc finger protein 81	-0.708307	5.52456e-06	3.03972e-05	-0.121704	0.432069	0.768449
ENSMUSG00000003934.6	MGI:109196	Efnb3	ephrin B3	-0.758652	8.31191e-06	4.40004e-05	-0.112702	0.507364	0.814328
ENSMUSG00000003948.18	MGI:1914718	Mmd	monocyte to macrophage differentiation-associated	-0.605751	0.000982	0.00319859	0.0746977	0.684304	0.899766
ENSMUSG00000003949.17	MGI:96108	Hlf	hepatic leukemia factor	-2.22094	1.77221e-09	2.23436e-08	-0.845605	0.0217106	0.212862
ENSMUSG00000003992.16	MGI:1914220	Ssbp2	single-stranded DNA binding protein 2	-1.05073	1.82208e-07	1.44106e-06	-0.50774	0.0113952	0.153075
ENSMUSG00000004031.14	MGI:2443333	Brinp2	bone morphogenic protein/retinoic acid inducible neural-specific 2	-2.27224	9.09802e-11	1.57024e-09	-0.325054	0.351865	0.714256
ENSMUSG00000004032.11	MGI:1309466	Gstm5	glutathione S-transferase, mu 5	-0.980027	4.3434e-10	6.45142e-09	-0.402704	0.0101711	0.14345
ENSMUSG00000004035.13	MGI:1915562	Gstm7	glutathione S-transferase, mu 7	-0.849933	1.89133e-05	9.24488e-05	-0.30726	0.120287	0.460086
ENSMUSG00000004071.14	MGI:1913876	Cdip1	cell death inducing Trp53 target 1	-0.716524	5.60773e-08	4.98117e-07	-0.134179	0.308645	0.679314
ENSMUSG00000004110.18	MGI:106217	Cacna1e	calcium channel, voltage-dependent, R type, alpha 1E subunit	-1.48542	3.41597e-05	0.000157552	-0.26959	0.451917	0.781499
ENSMUSG00000004113.19	MGI:88296	Cacna1b	calcium channel, voltage-dependent, N type, alpha 1B subunit	-0.944412	5.7624e-05	0.000251197	0.0403616	0.863315	0.96067
ENSMUSG00000004187.12	MGI:109187	Kifc2	kinesin family member C2	-1.40435	9.80378e-09	1.03207e-07	-0.208575	0.394152	0.740551
ENSMUSG00000004267.17	MGI:95394	Eno2	enolase 2, gamma neuronal	-0.921881	5.96224e-07	4.14748e-06	0.015453	0.933283	0.982883
ENSMUSG00000004360.10	MGI:3036239	9330159F19Rik	RIKEN cDNA 9330159F19 gene	-1.03335	2.26584e-08	2.18756e-07	-0.0645252	0.726313	0.914908
ENSMUSG00000004366.5	MGI:98326	Sst	somatostatin	-2.25829	0.000534385	0.00185462	0.73132	0.261152	0.638224
ENSMUSG00000004748.6	MGI:1916686	Mtfp1	mitochondrial fission process 1	-0.947391	6.06439e-05	0.000262967	-0.135704	0.563968	0.844378
ENSMUSG00000004933.18	MGI:99259	Matk	megakaryocyte-associated tyrosine kinase	-0.743404	0.000255569	0.000953693	0.0214058	0.916079	0.978281
ENSMUSG00000004936.9	MGI:1346866	Map2k1	mitogen-activated protein kinase kinase 1	-0.778202	2.73574e-05	0.000128506	-0.306571	0.0983288	0.42479
ENSMUSG00000005045.17	MGI:3036258	Chd5	chromodomain helicase DNA binding protein 5	-0.77367	7.98557e-05	0.000337079	0.155319	0.427664	0.765447
ENSMUSG00000005237.15	MGI:107731	Dnah2	dynein, axonemal, heavy chain 2	-0.979136	0.00263996	0.00769938	-0.339842	0.292582	0.666392
ENSMUSG00000005338.15	MGI:2137858	Cadm3	cell adhesion molecule 3	-0.928253	0.000813896	0.00270606	0.213979	0.440063	0.773691
ENSMUSG00000005362.15	MGI:1913277	Crbn	cereblon	-0.690639	1.4485e-10	2.40061e-09	-0.220014	0.0402553	0.284338
ENSMUSG00000005465.10	MGI:1355318	Il27ra	interleukin 27 receptor, alpha	-0.975188	0.00261811	0.00764185	-1.10672	0.000699182	0.0305438
ENSMUSG00000005580.12	MGI:108450	Adcy9	adenylate cyclase 9	-1.24456	3.23788e-08	3.02164e-07	-0.270025	0.229452	0.607203
ENSMUSG00000005716.17	MGI:97821	Pvalb	parvalbumin	-2.2828	2.03424e-09	2.52817e-08	0.223266	0.550595	0.83636
ENSMUSG00000005986.17	MGI:1915673	Ankrd13d	ankyrin repeat domain 13 family, member D	-0.640641	2.16378e-06	1.31532e-05	-0.019175	0.886386	0.968607
ENSMUSG00000006179.10	MGI:1859181	Prss16	protease, serine 16 (thymus)	-3.44394	6.99782e-05	0.000298804	-0.268238	0.664107	0.892471
ENSMUSG00000006235.7	MGI:95408	Epor	erythropoietin receptor	-1.0865	0.00122725	0.00390501	-0.233049	0.483759	0.80235
ENSMUSG00000006373.11	MGI:1858305	Pgrmc1	progesterone receptor membrane component 1	-0.622588	9.64577e-06	5.03115e-05	-0.071059	0.612969	0.869067
ENSMUSG00000006435.17	MGI:1334263	Neurl1a	neuralized E3 ubiquitin protein ligase 1A	-0.876149	1.47303e-05	7.39237e-05	-0.138275	0.493582	0.807448
ENSMUSG00000006575.15	MGI:1858752	Rundc3a	RUN domain containing 3A	-0.640386	2.13513e-06	1.29955e-05	0.0528771	0.695179	0.904647
ENSMUSG00000006576.17	MGI:109350	Slc4a3	solute carrier family 4 (anion exchanger), member 3	-0.650705	0.000134663	0.000536917	0.0955437	0.574017	0.850001
ENSMUSG00000006586.16	MGI:104793	Runx1t1	RUNX1 translocation partner 1	-2.47846	1.66627e-08	1.66113e-07	-0.208363	0.629084	0.876297
ENSMUSG00000006649.18	MGI:1859637	Nphs1	nephrosis 1, nephrin	-1.25053	6.85676e-05	0.000293473	-0.88719	0.00407812	0.0858107
ENSMUSG00000006675.11	MGI:1921693	P4htm	prolyl 4-hydroxylase, transmembrane (endoplasmic reticulum)	-0.779382	4.92033e-06	2.74241e-05	-0.0382683	0.821943	0.946858
ENSMUSG00000006711.16	MGI:3036268	D130043K22Rik	RIKEN cDNA D130043K22 gene	-1.15714	4.72906e-05	0.000210521	-0.00508655	0.98567	0.996863
ENSMUSG00000006717.8	MGI:1914084	Acot13	acyl-CoA thioesterase 13	-0.819901	7.47241e-08	6.45999e-07	-0.257234	0.0902866	0.408852
ENSMUSG00000006818.6	MGI:98352	Sod2	superoxide dismutase 2, mitochondrial	-0.603217	3.80247e-08	3.49188e-07	-0.102304	0.349666	0.713454
ENSMUSG00000006920.15	MGI:1097695	Ezh1	enhancer of zeste 1 polycomb repressive complex 2 subunit	-1.01443	3.24903e-07	2.42108e-06	-0.170052	0.390791	0.738615
ENSMUSG00000006958.15	MGI:1313268	Chrd	chordin	-1.44435	1.54176e-05	7.6957e-05	0.0712645	0.830715	0.949816
ENSMUSG00000007021.6	MGI:1341881	Syngr3	synaptogyrin 3	-0.776297	6.23028e-07	4.32244e-06	-0.201672	0.194462	0.566684
ENSMUSG00000007207.11	MGI:109355	Stx1a	syntaxin 1A (brain)	-1.0449	2.57797e-08	2.45274e-07	0.0235206	0.899673	0.973448
ENSMUSG00000007279.15	MGI:1928765	Scube2	signal peptide, CUB domain, EGF-like 2	-2.22068	4.61859e-06	2.58978e-05	-0.589644	0.168081	0.532904
ENSMUSG00000007440.11	MGI:1298408	Pcdha10	protocadherin alpha 10	-1.03585	1.77374e-09	2.23532e-08	-0.264433	0.123343	0.465665
ENSMUSG00000007594.11	MGI:2679531	Hapln4	hyaluronan and proteoglycan link protein 4	-2.35967	2.47105e-09	3.00865e-08	0.143118	0.71675	0.912183
ENSMUSG00000007653.13	MGI:95620	Gabrb2	gamma-aminobutyric acid (GABA) A receptor, subunit beta 2	-0.933099	0.000143263	0.000567351	-0.0235729	0.923377	0.980611
ENSMUSG00000007783.11	MGI:2446526	Cpt1c	carnitine palmitoyltransferase 1c	-0.707787	1.83055e-08	1.80427e-07	0.00530635	0.966251	0.991572
ENSMUSG00000007805.5	MGI:104685	Twist2	twist basic helix-loop-helix transcription factor 2	-4.48702	4.78118e-07	3.41508e-06	-0.492129	0.186769	0.55801
ENSMUSG00000007888.16	MGI:1340030	Crlf1	cytokine receptor-like factor 1	-1.24558	0.0031843	0.00909605	-0.310812	0.461106	0.786838
ENSMUSG00000007944.9	MGI:1920282	Ttc9b	tetratricopeptide repeat domain 9B	-0.857899	1.77833e-06	1.1065e-05	0.279227	0.115491	0.450798
ENSMUSG00000007950.10	MGI:1918946	Abhd8	abhydrolase domain containing 8	-1.02531	6.85494e-06	3.69803e-05	0.145672	0.522172	0.822166
ENSMUSG00000008129.15	MGI:1921916	Brme1	break repair meiotic recombinase recruitment factor 1	-0.790864	0.000155354	0.000609043	-0.0781104	0.68992	0.902125
ENSMUSG00000008136.15	MGI:1338762	Fhl2	four and a half LIM domains 2	-0.791408	0.00155563	0.00481775	0.0183656	0.941205	0.98524
ENSMUSG00000008153.13	MGI:2178323	Clstn3	calsyntenin 3	-0.78884	1.43529e-08	1.45456e-07	-0.0293104	0.832897	0.950497
ENSMUSG00000008307.12	MGI:1924286	1700109H08Rik	RIKEN cDNA 1700109H08 gene	-1.17755	1.69382e-08	1.68493e-07	-0.420226	0.035474	0.270181
ENSMUSG00000008489.19	MGI:1100887	Elavl2	ELAV like RNA binding protein 1	-2.4185	4.10402e-13	1.19632e-11	-0.190317	0.565604	0.845541
ENSMUSG00000008604.12	MGI:2150152	Ubqln4	ubiquilin 4	-0.627884	1.3549e-13	4.40472e-12	-0.122097	0.148785	0.504155
ENSMUSG00000008658.17	MGI:1926224	Rbfox1	RNA binding protein, fox-1 homolog (C. elegans) 1	-1.33686	5.3812e-06	2.9705e-05	-0.315872	0.282255	0.657152
ENSMUSG00000009075.3	MGI:2183437	Cabp7	calcium binding protein 7	-0.994962	5.60604e-05	0.000245012	-0.0709181	0.773922	0.930131
ENSMUSG00000009207.16	MGI:1918115	Lnpk	lunapark, ER junction formation factor	-0.924856	7.90617e-08	6.79619e-07	-0.0944326	0.581407	0.855026
ENSMUSG00000009394.14	MGI:103020	Syn2	synapsin II	-1.46554	3.0901e-05	0.000143488	0.0595711	0.865468	0.961478
ENSMUSG00000009406.14	MGI:101833	Elk1	ELK1, member of ETS oncogene family	-1.08039	0.000791662	0.00263988	-0.126324	0.69456	0.904179
ENSMUSG00000009535.14	MGI:1915147	Rnmt	RNA (guanine-7-) methyltransferase	-0.586776	6.97285e-09	7.61062e-08	-0.157944	0.117851	0.45585
ENSMUSG00000009551.3	MGI:1917980	6330409D20Rik	RIKEN cDNA 6330409D20 gene	-1.52731	0.0028896	0.00835041	-0.300119	0.486791	0.803479
ENSMUSG00000009569.15	MGI:3050795	Mrtfb	myocardin related transcription factor B	-0.867459	9.82875e-05	0.000405075	-0.397391	0.0743051	0.376962
ENSMUSG00000009681.11	MGI:88141	Bcr	BCR activator of RhoGEF and GTPase	-0.689224	4.75867e-05	0.000211671	0.0079461	0.962543	0.990292
ENSMUSG00000009894.16	MGI:1915076	Snap47	synaptosomal-associated protein, 47	-0.586665	2.10996e-05	0.000102078	-0.0451509	0.743197	0.919823
ENSMUSG00000010080.16	MGI:1919139	Epn3	epsin 3	-2.04706	0.00353685	0.00999496	0.304919	0.591617	0.86062
ENSMUSG00000010086.18	MGI:106611	Rnf112	ring finger protein 112	-1.04287	0.00264786	0.00772007	0.0146341	0.966349	0.991591
ENSMUSG00000010154.8	MGI:2446256	Spire2	spire type actin nucleation factor 2	-0.934875	2.84491e-06	1.67521e-05	0.241839	0.213964	0.589983
ENSMUSG00000010592.10	MGI:1342328	Dazl	deleted in azoospermia-like	-1.61323	2.78987e-10	4.32243e-09	-0.520563	0.0301223	0.251278
ENSMUSG00000011034.7	MGI:107678	Slc5a1	solute carrier family 5 (sodium/glucose cotransporter), member 1	-3.65824	2.17814e-05	0.000105023	-1.01917	0.0555237	0.328438
ENSMUSG00000011751.17	MGI:1890574	Sptbn4	spectrin beta, non-erythrocytic 4	-0.908633	8.37141e-05	0.000350997	0.121382	0.598884	0.863667
ENSMUSG00000011877.14	MGI:1927140	Git1	GIT ArfGAP 1	-0.914387	4.90469e-05	0.000217465	0.104533	0.642462	0.882425
ENSMUSG00000014164.16	MGI:2445185	Klhl3	kelch-like 3	-0.996904	4.13487e-07	3.00415e-06	-0.108072	0.581915	0.855079
ENSMUSG00000014426.10	MGI:1346875	Map3k4	mitogen-activated protein kinase kinase kinase 4	-0.634779	0.000149163	0.000587966	-0.359664	0.0315025	0.256881
ENSMUSG00000014592.22	MGI:2140230	Camta1	calmodulin binding transcription activator 1	-1.23941	8.95503e-07	5.99453e-06	-0.202236	0.422487	0.761235
ENSMUSG00000014763.9	MGI:1914794	Fam120b	family with sequence similarity 120, member B	-0.701736	2.28858e-11	4.55672e-10	-0.181633	0.081814	0.393236
ENSMUSG00000014782.17	MGI:2142544	Plekhg4	pleckstrin homology domain containing, family G (with RhoGef domain) member 4	-1.33173	0.000402784	0.00143831	-0.949718	0.0111979	0.151925
ENSMUSG00000014786.9	MGI:2685542	Slc9a5	solute carrier family 9 (sodium/hydrogen exchanger), member 5	-0.936388	3.45875e-05	0.000159168	-0.813574	0.000327817	0.0187637
ENSMUSG00000014813.10	MGI:109131	Stc1	stanniocalcin 1	-1.32701	0.00033154	0.00120728	-0.632449	0.0755853	0.379743
ENSMUSG00000015087.15	MGI:2442633	Rabl6	RAB, member RAS oncogene family-like 6	-0.653921	1.57343e-10	2.59126e-09	-0.114945	0.259486	0.636646
ENSMUSG00000015127.15	MGI:1921404	Unkl	unkempt family like zinc finger	-0.601072	2.95801e-06	1.73259e-05	-0.112282	0.379353	0.731734
ENSMUSG00000015214.15	MGI:1858271	Mtmr1	myotubularin related protein 1	-0.621203	3.1334e-11	6.05234e-10	-0.185496	0.0460932	0.303127
ENSMUSG00000015222.19	MGI:97175	Map2	microtubule-associated protein 2	-0.646696	0.000323833	0.00118185	-0.0589994	0.742852	0.919668
ENSMUSG00000015342.7	MGI:103569	Xk	X-linked Kx blood group	-1.23838	2.67006e-13	8.11198e-12	-0.397093	0.0180749	0.196181
ENSMUSG00000015377.11	MGI:1916690	Dennd6b	DENN/MADD domain containing 6B	-0.651622	0.0010545	0.00340628	-0.0353153	0.858723	0.959177
ENSMUSG00000015476.7	MGI:1932118	Prrt1	proline-rich transmembrane protein 1	-1.04772	4.4472e-08	4.02613e-07	-0.165985	0.385153	0.734678
ENSMUSG00000015501.11	MGI:1338076	Hivep2	human immunodeficiency virus type I enhancer binding protein 2	-1.03967	1.71868e-10	2.80477e-09	-0.264497	0.104058	0.433496
ENSMUSG00000015879.9	MGI:2442958	Fam184b	family with sequence similarity 184, member B	-0.587086	0.00102144	0.00331316	-0.199392	0.262434	0.639543
ENSMUSG00000015957.13	MGI:101948	Wnt11	wingless-type MMTV integration site family, member 11	-2.53667	0.000868205	0.00287051	-0.683361	0.339785	0.705475
ENSMUSG00000015968.19	MGI:88293	Cacna1d	calcium channel, voltage-dependent, L type, alpha 1D subunit	-0.591303	0.000509664	0.00177891	-0.164489	0.33287	0.69942
ENSMUSG00000015981.13	MGI:2385336	Stk32c	serine/threonine kinase 32C	-0.989312	0.0018648	0.00566249	-0.196207	0.53688	0.829792
ENSMUSG00000016179.12	MGI:2388073	Camk1g	calcium/calmodulin-dependent protein kinase I gamma	-1.67342	7.32122e-11	1.3005e-09	0.118739	0.635133	0.879543
ENSMUSG00000016181.11	MGI:2138080	Utp25	UTP25 small subunit processome component	-0.624178	3.76027e-08	3.46087e-07	-0.119068	0.286795	0.661906
ENSMUSG00000016200.15	MGI:2444490	Syt14	synaptotagmin XIV	-1.16632	2.05264e-08	2.00123e-07	-0.317782	0.124571	0.467027
ENSMUSG00000016262.15	MGI:2443496	Sertad4	SERTA domain containing 4	-1.13113	0.000361161	0.0013031	-0.328508	0.299336	0.671862
ENSMUSG00000016346.18	MGI:1309503	Kcnq2	potassium voltage-gated channel, subfamily Q, member 2	-1.29883	4.67378e-09	5.36162e-08	-0.0912453	0.68051	0.898434
ENSMUSG00000016382.16	MGI:104807	Pls3	plastin 3 (T-isoform)	-0.984973	2.1351e-07	1.6589e-06	-0.141539	0.455519	0.783256
ENSMUSG00000016386.16	MGI:1924265	Mpped2	metallophosphoesterase domain containing 2	-1.39103	7.04782e-08	6.13162e-07	-0.381446	0.137965	0.489542
ENSMUSG00000016493.14	MGI:1203290	Cd46	CD46 antigen, complement regulatory protein	-0.872693	0.000526176	0.00182966	-0.191936	0.440161	0.773718
ENSMUSG00000017132.18	MGI:1334257	Cyth1	cytohesin 1	-0.774125	9.82644e-07	6.51421e-06	-0.377028	0.0170029	0.189311
ENSMUSG00000017167.7	MGI:1858201	Cntnap1	contactin associated protein-like 1	-1.47239	3.30353e-10	5.05026e-09	-0.398281	0.0887776	0.405574
ENSMUSG00000017210.15	MGI:1344385	Med24	mediator complex subunit 24	-0.585577	1.28899e-08	1.3193e-07	-0.0250135	0.80733	0.942054
ENSMUSG00000017314.13	MGI:1858257	Mpp2	membrane protein, palmitoylated 2 (MAGUK p55 subfamily member 2)	-1.18101	1.15487e-14	4.83652e-13	-0.294004	0.05388	0.324736
ENSMUSG00000017400.11	MGI:2144518	Stac2	SH3 and cysteine rich domain 2	-0.967406	1.109e-07	9.21106e-07	0.121737	0.502231	0.811855
ENSMUSG00000017412.16	MGI:103301	Cacnb4	calcium channel, voltage-dependent, beta 4 subunit	-0.924699	2.43918e-08	2.33071e-07	-0.34185	0.0390049	0.281257
ENSMUSG00000017631.20	MGI:107771	Abr	active BCR-related gene	-0.662928	0.000199732	0.000763652	-0.193949	0.276469	0.65257
ENSMUSG00000017740.18	MGI:1862037	Slc12a5	solute carrier family 12, member 5	-1.06666	1.86777e-08	1.83718e-07	-0.196876	0.299002	0.671699
ENSMUSG00000017943.16	MGI:2385163	Gdap1l1	ganglioside-induced differentiation-associated protein 1-like 1	-0.623194	7.81625e-05	0.000330465	0.349774	0.0256603	0.23063
ENSMUSG00000017978.19	MGI:2443963	Cadps2	Ca2+-dependent activator protein for secretion 2	-1.6036	2.32272e-06	1.39747e-05	-0.0191893	0.954784	0.98874
ENSMUSG00000018076.13	MGI:2670178	Med13l	mediator complex subunit 13-like	-0.613743	3.83121e-06	2.18446e-05	-0.222506	0.093494	0.415644
ENSMUSG00000018196.19	MGI:1916617	Glrx2	glutaredoxin 2 (thioltransferase)	-0.730129	3.71281e-13	1.09157e-11	-0.12923	0.193717	0.566301
ENSMUSG00000018322.11	MGI:1914395	Tomm34	translocase of outer mitochondrial membrane 34	-1.02975	9.52358e-14	3.18979e-12	-0.215022	0.118027	0.456018
ENSMUSG00000018326.10	MGI:1891917	Ywhab	tyrosine 3-monooxygenase/tryptophan 5-monooxygenase activation protein, beta polypeptide	-0.598846	6.66983e-06	3.6071e-05	-0.0685221	0.606156	0.866238
ENSMUSG00000018334.19	MGI:105051	Ksr1	kinase suppressor of ras 1	-0.860197	0.000700391	0.00236959	-0.208998	0.410006	0.752796
ENSMUSG00000018395.20	MGI:107689	Kif3a	kinesin family member 3A	-0.66132	1.39304e-08	1.41622e-07	-0.0388603	0.737891	0.91794
ENSMUSG00000018415.15	MGI:1914021	Gid4	GID complex subunit 4, VID24 homolog	-0.927609	5.81659e-09	6.50404e-08	-0.275749	0.0827147	0.394719
ENSMUSG00000018470.9	MGI:1336208	Kcnab3	potassium voltage-gated channel, shaker-related subfamily, beta member 3	-1.60891	3.37356e-09	3.99098e-08	0.260928	0.330005	0.697228
ENSMUSG00000018474.19	MGI:1344395	Chd3	chromodomain helicase DNA binding protein 3	-0.848282	4.57355e-05	0.000204289	-0.0652157	0.75393	0.922232
ENSMUSG00000018486.3	MGI:1197020	Wnt9b	wingless-type MMTV integration site family, member 9B	-3.2549	2.99281e-09	3.57435e-08	-0.504823	0.247191	0.624776
ENSMUSG00000018501.18	MGI:1349717	Ncor1	nuclear receptor co-repressor 1	-0.621015	2.47864e-07	1.89915e-06	-0.176921	0.14135	0.494092
ENSMUSG00000018548.16	MGI:2153072	Trim37	tripartite motif-containing 37	-1.14144	6.11166e-13	1.70883e-11	-0.189391	0.231735	0.609319
ENSMUSG00000018554.14	MGI:1096372	Ybx2	Y box protein 2	-1.3527	2.16782e-06	1.3175e-05	0.287	0.289982	0.664437
ENSMUSG00000018865.10	MGI:1888971	Sult4a1	sulfotransferase family 4A, member 1	-0.642203	0.000291861	0.00107545	-0.0424586	0.810641	0.94373
ENSMUSG00000018965.12	MGI:109194	Ywhah	tyrosine 3-monooxygenase/tryptophan 5-monooxygenase activation protein, eta polypeptide	-1.13607	2.78722e-07	2.11308e-06	-0.128378	0.561421	0.842917
ENSMUSG00000019082.19	MGI:1915517	Slc25a22	solute carrier family 25 (mitochondrial carrier, glutamate), member 22	-0.853027	1.79011e-06	1.1131e-05	-0.0206345	0.907943	0.975602
ENSMUSG00000019146.3	MGI:1316660	Cacng2	calcium channel, voltage-dependent, gamma subunit 2	-1.13406	1.46661e-10	2.42643e-09	-0.137725	0.433917	0.769196
ENSMUSG00000019210.11	MGI:894326	Atp6v1e1	ATPase, H+ transporting, lysosomal V1 subunit E1	-0.59556	7.17884e-07	4.91549e-06	-0.127503	0.28815	0.663061
ENSMUSG00000019230.15	MGI:1316721	Lhx9	LIM homeobox protein 9	-1.83296	1.06937e-05	5.53459e-05	-0.260841	0.526597	0.824276
ENSMUSG00000019235.10	MGI:2443413	Rps6kl1	ribosomal protein S6 kinase-like 1	-0.993508	3.24114e-09	3.85015e-08	-0.0745437	0.654653	0.887526
ENSMUSG00000019302.17	MGI:103286	Atp6v0a1	ATPase, H+ transporting, lysosomal V0 subunit A1	-0.58962	3.33461e-06	1.92767e-05	-0.0378842	0.765002	0.926092
ENSMUSG00000019370.11	MGI:103249	Calm3	calmodulin 3	-0.952268	1.57998e-08	1.58444e-07	-0.128976	0.443837	0.776322
ENSMUSG00000019467.16	MGI:1277173	Arhgef25	Rho guanine nucleotide exchange factor (GEF) 25	-1.0401	1.49481e-05	7.48862e-05	-0.261397	0.27637	0.652569
ENSMUSG00000019478.18	MGI:105069	Rab4a	RAB4A, member RAS oncogene family	-0.8175	4.19631e-13	1.21951e-11	-0.0729431	0.50653	0.813811
ENSMUSG00000019699.17	MGI:1345147	Akt3	thymoma viral proto-oncogene 3	-1.1799	6.61451e-13	1.82635e-11	-0.35089	0.0323118	0.260159
ENSMUSG00000019726.13	MGI:107448	Lyst	lysosomal trafficking regulator	-0.75335	0.000526655	0.00183066	-0.312903	0.149696	0.506497
ENSMUSG00000019734.17	MGI:2669035	Tmc4	transmembrane channel-like gene family 4	-0.731002	0.00185608	0.00564137	-0.000751456	0.997407	0.99939
ENSMUSG00000019737.15	MGI:2141950	Syne4	spectrin repeat containing, nuclear envelope family member 4	-0.78828	0.00237306	0.006999	0.290222	0.247248	0.624787
ENSMUSG00000019761.11	MGI:96685	Krt10	keratin 10	-0.738965	0.000315675	0.00115462	-0.440478	0.0298868	0.250122
ENSMUSG00000019762.5	MGI:1917587	Iyd	iodotyrosine deiodinase	-3.71862	2.29167e-07	1.76956e-06	-0.696636	0.318301	0.687473
ENSMUSG00000019775.18	MGI:1927469	Rgs17	regulator of G-protein signaling 17	-0.973262	0.000244953	0.000917767	0.247927	0.348529	0.712334
ENSMUSG00000019785.15	MGI:2443223	Clvs2	clavesin 2	-1.43563	1.73926e-09	2.20054e-08	-0.62099	0.00899738	0.134622
ENSMUSG00000019795.18	MGI:97502	Pcmt1	protein-L-isoaspartate (D-aspartate) O-methyltransferase 1	-0.636493	6.97889e-09	7.61432e-08	-0.193501	0.0775588	0.383488
ENSMUSG00000019796.13	MGI:2442989	Lrp11	low density lipoprotein receptor-related protein 11	-0.71658	3.62269e-06	2.07709e-05	-0.128525	0.405587	0.749208
ENSMUSG00000019828.14	MGI:1351338	Grm1	glutamate receptor, metabotropic 1	-1.37732	0.000549078	0.00190125	-0.146809	0.712307	0.910623
ENSMUSG00000019831.15	MGI:1890563	Wasf1	WASP family, member 1	-1.56801	1.41611e-06	9.01788e-06	-0.296876	0.360971	0.720664
ENSMUSG00000019836.6	MGI:3650439	Amd-ps4	S-adenosylmethionine decarboxylase, pseudogene 4	-0.59097	6.55487e-05	0.000281857	-0.206713	0.153765	0.513454
ENSMUSG00000019852.8	MGI:106387	Arfgef3	ARFGEF family member 3	-1.08553	6.29539e-08	5.53898e-07	-0.315565	0.115404	0.450798
ENSMUSG00000019877.11	MGI:1926228	Serinc1	serine incorporator 1	-0.711684	2.46971e-08	2.35832e-07	-0.207895	0.103286	0.432061
ENSMUSG00000019888.17	MGI:1914819	Mgat4c	MGAT4 family, member C	-2.14481	2.73187e-07	2.0733e-06	-0.140569	0.727181	0.914908
ENSMUSG00000019894.15	MGI:2143484	Slc6a15	solute carrier family 6 (neurotransmitter transporter), member 15	-1.53179	2.57161e-07	1.9615e-06	-0.598453	0.0437394	0.295049
ENSMUSG00000019906.16	MGI:2135609	Lin7a	lin-7 homolog A (C. elegans)	-0.682416	0.000384388	0.00137775	-0.12767	0.503722	0.812459
ENSMUSG00000019935.17	MGI:3039629	Slc17a8	solute carrier family 17 (sodium-dependent inorganic phosphate cotransporter), member 8	-2.39395	2.63269e-07	2.00278e-06	-0.103468	0.817201	0.945264
ENSMUSG00000019943.11	MGI:104653	Atp2b1	ATPase, Ca++ transporting, plasma membrane 1	-1.46124	1.65415e-09	2.10769e-08	-0.294669	0.223993	0.600774
ENSMUSG00000019951.11	MGI:2442888	Uhrf1bp1l	UHRF1 (ICBP90) binding protein 1-like	-0.653519	5.84951e-07	4.07793e-06	0.0107605	0.93427	0.983077
ENSMUSG00000019986.18	MGI:87971	Ahi1	Abelson helper integration site 1	-0.900519	8.96503e-09	9.54301e-08	-0.320784	0.0403308	0.284494
ENSMUSG00000019990.16	MGI:1352752	Pde7b	phosphodiesterase 7B	-1.03422	2.39877e-06	1.43811e-05	-0.755239	0.000550163	0.0263383
ENSMUSG00000019996.18	MGI:1328328	Map7	microtubule-associated protein 7	-1.00427	2.73996e-09	3.29839e-08	-0.257442	0.126636	0.470263
ENSMUSG00000020015.11	MGI:97517	Cdk17	cyclin-dependent kinase 17	-0.734897	1.65746e-06	1.03915e-05	-0.251588	0.100589	0.428698
ENSMUSG00000020042.16	MGI:1921257	Btbd11	BTB (POZ) domain containing 11	-1.08684	7.26954e-06	3.90354e-05	0.688319	0.00320215	0.0758432
ENSMUSG00000020070.19	MGI:1917682	Rufy2	RUN and FYVE domain-containing 2	-0.587987	7.21281e-08	6.25248e-07	-0.0586876	0.588144	0.858691
ENSMUSG00000020090.8	MGI:2685082	Npffr1	neuropeptide FF receptor 1	-2.65962	1.28211e-06	8.2541e-06	0.450908	0.377499	0.730422
ENSMUSG00000020096.22	MGI:1923820	Tbata	thymus, brain and testes associated	-3.03245	2.02955e-08	1.98099e-07	-0.398794	0.446219	0.777426
ENSMUSG00000020102.16	MGI:1330284	Slc16a7	solute carrier family 16 (monocarboxylic acid transporters), member 7	-0.616951	1.20648e-05	6.16766e-05	-0.149933	0.286062	0.660943
ENSMUSG00000020135.14	MGI:1346052	Apc2	APC regulator of WNT signaling pathway 2	-0.643052	7.34513e-06	3.93942e-05	0.248491	0.0824223	0.394052
ENSMUSG00000020151.17	MGI:109559	Ptprr	protein tyrosine phosphatase, receptor type, R	-0.785791	1.25075e-05	6.373e-05	-0.279659	0.116785	0.453594
ENSMUSG00000020152.8	MGI:1913963	Actr2	ARP2 actin-related protein 2	-0.593521	2.20291e-07	1.70468e-06	-0.251749	0.0279444	0.241648
ENSMUSG00000020218.12	MGI:1344332	Wif1	Wnt inhibitory factor 1	-1.54473	0.000981467	0.00319721	0.67291	0.0845169	0.398217
ENSMUSG00000020251.15	MGI:1922032	Glt8d2	glycosyltransferase 8 domain containing 2	-1.69229	9.30413e-05	0.000385997	-0.210934	0.623857	0.874305
ENSMUSG00000020262.16	MGI:891999	Adarb1	adenosine deaminase, RNA-specific, B1	-0.990305	8.64655e-10	1.18438e-08	-0.200118	0.214651	0.590876
ENSMUSG00000020268.15	MGI:1922780	Lyrm7	LYR motif containing 7	-0.990308	4.36628e-08	3.95785e-07	-0.159424	0.369498	0.725244
ENSMUSG00000020277.11	MGI:97547	Pfkl	phosphofructokinase, liver, B-type	-0.661159	0.00344537	0.00976139	0.0790409	0.726446	0.914908
ENSMUSG00000020297.11	MGI:1202070	Nsg2	neuron specific gene family member 2	-1.24321	1.11195e-07	9.23288e-07	-0.143518	0.539906	0.83112
ENSMUSG00000020300.15	MGI:1914829	Cpeb4	cytoplasmic polyadenylation element binding protein 4	-0.624611	7.07792e-07	4.85664e-06	-0.285553	0.0232422	0.219325
ENSMUSG00000020309.7	MGI:1915294	Chac2	ChaC, cation transport regulator 2	-0.641604	2.13892e-05	0.000103322	-0.439001	0.00265148	0.0679747
ENSMUSG00000020335.14	MGI:1351476	Zfp354b	zinc finger protein 354B	-0.7034	0.000173797	0.000673714	0.132241	0.46208	0.787358
ENSMUSG00000020340.17	MGI:1924134	Cyfip2	cytoplasmic FMR1 interacting protein 2	-1.2017	2.71984e-10	4.22757e-09	-0.184145	0.33314	0.699561
ENSMUSG00000020366.19	MGI:1346862	Mapk9	mitogen-activated protein kinase 9	-0.612185	1.6521e-11	3.3783e-10	-0.082308	0.363734	0.721791
ENSMUSG00000020396.9	MGI:97309	Nefh	neurofilament, heavy polypeptide	-1.45572	1.17828e-06	7.65687e-06	0.416602	0.160664	0.522391
ENSMUSG00000020431.6	MGI:99677	Adcy1	adenylate cyclase 1	-1.25207	0.000175905	0.000680879	-1.17762	0.000418336	0.0220512
ENSMUSG00000020435.18	MGI:1921559	Osbp2	oxysterol binding protein 2	-0.870699	2.53469e-06	1.51078e-05	-0.433838	0.0189146	0.200222
ENSMUSG00000020444.20	MGI:95871	Guk1	guanylate kinase 1	-0.591588	1.2809e-06	8.24817e-06	-0.0797881	0.512077	0.8169
ENSMUSG00000020447.6	MGI:2685089	Npc1l1	NPC1 like intracellular cholesterol transporter 1	-1.41719	0.00130407	0.00412166	-0.137215	0.747365	0.921354
ENSMUSG00000020524.17	MGI:95808	Gria1	glutamate receptor, ionotropic, AMPA1 (alpha 1)	-1.43955	9.44421e-07	6.28544e-06	-0.313795	0.285119	0.660076
ENSMUSG00000020526.13	MGI:3051596	Znhit3	zinc finger, HIT type 3	-0.618923	3.43757e-08	3.19437e-07	-0.308759	0.00541526	0.101134
ENSMUSG00000020562.8	MGI:1922290	Efcab10	EF-hand calcium binding domain 10	-0.949289	0.00217579	0.00648769	-0.529153	0.0741275	0.376431
ENSMUSG00000020566.20	MGI:1916025	Atp6v1c2	ATPase, H+ transporting, lysosomal V1 subunit C2	-1.39191	0.00348351	0.00986068	-0.533145	0.231325	0.609176
ENSMUSG00000020577.18	MGI:1913359	Tspan13	tetraspanin 13	-0.905111	1.77452e-06	1.10436e-05	-0.0235973	0.900754	0.973842
ENSMUSG00000020589.18	MGI:1261783	Cyria	CYFIP related Rac1 interactor A	-0.831672	3.5136e-09	4.13868e-08	-0.296518	0.0351239	0.269101
ENSMUSG00000020607.8	MGI:2145011	Lratd1	LRAT domain containing 1	-1.06809	0.00229725	0.0068019	-0.1228	0.725763	0.914908
ENSMUSG00000020620.15	MGI:1351668	Abca8b	ATP-binding cassette, sub-family A (ABC1), member 8b	-0.925562	0.000358228	0.00129415	-0.00527989	0.983694	0.996474
ENSMUSG00000020627.11	MGI:2683857	Klhl29	kelch-like 29	-0.992917	1.25478e-05	6.3911e-05	-0.0992431	0.6617	0.89156
ENSMUSG00000020635.9	MGI:1336205	Fkbp1b	FK506 binding protein 1b	-0.958669	4.11463e-05	0.000186223	0.0974872	0.67311	0.8958
ENSMUSG00000020647.11	MGI:1276523	Ncoa1	nuclear receptor coactivator 1	-0.930862	2.6239e-09	3.17862e-08	-0.214425	0.169667	0.534832
ENSMUSG00000020656.17	MGI:2182540	Grhl1	grainyhead like transcription factor 1	-0.628445	0.00115006	0.00368493	-0.144022	0.454624	0.782434
ENSMUSG00000020657.17	MGI:2443036	Dnajc27	DnaJ heat shock protein family (Hsp40) member C27	-0.925825	1.56936e-12	3.99221e-11	-0.191674	0.141945	0.495358
ENSMUSG00000020668.11	MGI:107979	Kif3c	kinesin family member 3C	-0.720317	1.82881e-07	1.44551e-06	-0.0588493	0.669631	0.894163
ENSMUSG00000020704.14	MGI:1100867	Asic2	acid-sensing (proton-gated) ion channel 2	-1.6646	1.72597e-07	1.37594e-06	-0.293744	0.354614	0.716324
ENSMUSG00000020745.16	MGI:109520	Pafah1b1	platelet-activating factor acetylhydrolase, isoform 1b, subunit 1	-0.62503	1.06398e-08	1.11073e-07	-0.123339	0.258701	0.635767
ENSMUSG00000020785.18	MGI:1891766	Camkk1	calcium/calmodulin-dependent protein kinase kinase 1, alpha	-1.38699	1.00967e-05	5.24828e-05	-0.350916	0.263781	0.640483
ENSMUSG00000020802.9	MGI:2444266	Ube2o	ubiquitin-conjugating enzyme E2O	-0.651317	7.49947e-06	4.01278e-05	0.0949079	0.512911	0.817453
ENSMUSG00000020810.6	MGI:2149481	Cygb	cytoglobin	-2.02499	1.53278e-06	9.67524e-06	-0.471332	0.26199	0.639213
ENSMUSG00000020827.19	MGI:1355329	Mink1	misshapen-like kinase 1 (zebrafish)	-0.712213	5.12223e-07	3.62806e-06	-0.13364	0.345728	0.710553
ENSMUSG00000020836.16	MGI:2183448	Coro6	coronin 6	-2.16802	4.16812e-09	4.82968e-08	0.702976	0.0463856	0.303985
ENSMUSG00000020848.8	MGI:1100497	Doc2b	double C2, beta	-1.67367	4.07986e-05	0.000184795	-0.462592	0.256551	0.633696
ENSMUSG00000020882.18	MGI:102522	Cacnb1	calcium channel, voltage-dependent, beta 1 subunit	-0.782415	8.10679e-05	0.000341444	0.116179	0.55785	0.840907
ENSMUSG00000020886.18	MGI:1277959	Dlg4	discs large MAGUK scaffold protein 4	-0.747532	1.01018e-06	6.68134e-06	-0.143002	0.349461	0.713178
ENSMUSG00000020890.12	MGI:105123	Gucy2e	guanylate cyclase 2e	-0.712813	0.000556404	0.00192408	-0.574925	0.00563861	0.103749
ENSMUSG00000020891.12	MGI:1098228	Alox8	arachidonate 8-lipoxygenase	-1.57167	1.57489e-12	4.00276e-11	-0.397415	0.0534046	0.324005
ENSMUSG00000020894.17	MGI:1313277	Vamp2	vesicle-associated membrane protein 2	-0.691616	2.00553e-08	1.95862e-07	-0.1352	0.27246	0.648081
ENSMUSG00000020926.17	MGI:1098667	Adam11	a disintegrin and metallopeptidase domain 11	-0.87013	5.64432e-05	0.00024661	-0.0928098	0.667252	0.89347
ENSMUSG00000020930.10	MGI:1920543	Ccdc103	coiled-coil domain containing 103	-1.10259	1.84814e-06	1.14572e-05	-0.371628	0.0863494	0.401494
ENSMUSG00000020936.9	MGI:102579	Nmt1	N-myristoyltransferase 1	-0.595462	2.67275e-05	0.000125897	-0.329862	0.01997	0.205908
ENSMUSG00000020940.14	MGI:1916691	Efcab15	EF-hand calcium binding domain 15	-1.34855	0.00151631	0.0047046	0.227754	0.553148	0.837832
ENSMUSG00000020986.14	MGI:1349635	Sec23a	SEC23 homolog A, COPII coat complex component	-0.602934	3.56345e-08	3.30084e-07	-0.021836	0.841226	0.953706
ENSMUSG00000020990.6	MGI:1918341	Cdkl1	cyclin-dependent kinase-like 1 (CDC2-related kinase)	-1.33422	7.63669e-07	5.19667e-06	-0.457001	0.0835207	0.396005
ENSMUSG00000021007.15	MGI:2144877	Spata7	spermatogenesis associated 7	-0.65977	8.74512e-09	9.36034e-08	-0.0268948	0.811517	0.943763
ENSMUSG00000021027.18	MGI:1931050	Ralgapa1	Ral GTPase activating protein, alpha subunit 1	-0.833193	8.02535e-11	1.41222e-09	-0.291902	0.0226091	0.216205
ENSMUSG00000021051.11	MGI:1349473	Ppp2r5e	protein phosphatase 2, regulatory subunit B', epsilon	-0.616613	9.24995e-13	2.4872e-11	-0.12088	0.159177	0.520559
ENSMUSG00000021057.16	MGI:2685104	Akap5	A kinase (PRKA) anchor protein 5	-1.54777	3.96068e-10	5.94123e-09	-0.256542	0.297517	0.670632
ENSMUSG00000021061.16	MGI:98387	Sptb	spectrin beta, erythrocytic	-1.13987	1.08107e-05	5.58309e-05	-0.288955	0.26445	0.641202
ENSMUSG00000021062.16	MGI:1916865	Rab15	RAB15, member RAS oncogene family	-1.42929	5.83481e-11	1.05847e-09	-0.22416	0.303394	0.675161
ENSMUSG00000021066.10	MGI:1921241	Atl1	atlastin GTPase 1	-1.06939	1.07139e-07	8.92183e-07	-0.111164	0.579755	0.853874
ENSMUSG00000021068.18	MGI:105108	Nin	ninein	-0.689294	2.17843e-06	1.3231e-05	-0.138128	0.341452	0.706283
ENSMUSG00000021087.19	MGI:1933947	Rtn1	reticulon 1	-1.07727	8.06079e-11	1.41672e-09	-0.225541	0.17341	0.539803
ENSMUSG00000021096.12	MGI:99878	Ppm1a	protein phosphatase 1A, magnesium dependent, alpha isoform	-0.67392	1.55307e-12	3.95428e-11	-0.16879	0.075977	0.380538
ENSMUSG00000021097.16	MGI:2136957	Clmn	calmin	-0.66417	3.78116e-07	2.77591e-06	-0.353721	0.00680513	0.114975
ENSMUSG00000021098.15	MGI:1923051	4930447C04Rik	RIKEN cDNA 4930447C04 gene	-2.2823	3.54821e-13	1.04703e-11	-0.332326	0.265507	0.641943
ENSMUSG00000021114.10	MGI:1921084	Atp6v1d	ATPase, H+ transporting, lysosomal V1 subunit D	-0.700429	8.95001e-09	9.53706e-08	-0.15031	0.216439	0.592905
ENSMUSG00000021123.13	MGI:1925224	Rdh12	retinol dehydrogenase 12	-0.677722	0.00241239	0.00710479	-0.192377	0.368252	0.724789
ENSMUSG00000021125.7	MGI:1330806	Arg2	arginase type II	-2.37769	0.00119187	0.00380422	-0.600418	0.405654	0.749266
ENSMUSG00000021130.9	MGI:1917754	Galnt16	polypeptide N-acetylgalactosaminyltransferase 16	-1.03256	1.107e-09	1.47636e-08	-0.24748	0.143591	0.496645
ENSMUSG00000021140.10	MGI:1891924	Pcnx	pecanex homolog	-0.623808	1.48249e-10	2.44926e-09	-0.167058	0.0856664	0.400028
ENSMUSG00000021156.18	MGI:1913755	Zmynd11	zinc finger, MYND domain containing 11	-0.61141	4.76816e-09	5.446e-08	-0.166694	0.109906	0.442461
ENSMUSG00000021180.10	MGI:1920336	Rps6ka5	ribosomal protein S6 kinase, polypeptide 5	-0.630158	0.000726891	0.0024483	-0.157024	0.396618	0.74253
ENSMUSG00000021198.17	MGI:2684729	Unc79	unc-79 homolog	-0.913891	4.57901e-08	4.13895e-07	-0.229236	0.169203	0.534166
ENSMUSG00000021203.16	MGI:1915399	Otub2	OTU domain, ubiquitin aldehyde binding 2	-0.596718	0.00237109	0.00699462	-0.171868	0.380516	0.731734
ENSMUSG00000021209.13	MGI:1921771	Ppp4r4	protein phosphatase 4, regulatory subunit 4	-0.678051	3.09721e-05	0.000143772	0.194432	0.229607	0.607394
ENSMUSG00000021214.15	MGI:2145420	Akr1c18	aldo-keto reductase family 1, member C18	-3.88658	9.44897e-07	6.2857e-06	0.192729	0.781511	0.932907
ENSMUSG00000021221.16	MGI:1917377	Dpf3	D4, zinc and double PHD fingers, family 3	-1.10112	0.000439993	0.00155803	-0.228305	0.463518	0.788546
ENSMUSG00000021228.16	MGI:2159619	Acot3	acyl-CoA thioesterase 3	-1.24786	2.59299e-05	0.000122561	-0.541142	0.0638611	0.350574
ENSMUSG00000021244.16	MGI:1926195	Ylpm1	YLP motif containing 1	-0.619965	9.93781e-07	6.58197e-06	-0.120094	0.342212	0.706819
ENSMUSG00000021265.4	MGI:2444911	Slc25a29	solute carrier family 25 (mitochondrial carrier, palmitoylcarnitine transporter), member 29	-0.936033	1.72232e-08	1.71168e-07	0.144632	0.370818	0.725864
ENSMUSG00000021268.18	MGI:1202886	Meg3	maternally expressed 3	-1.04877	2.03564e-05	9.88646e-05	0.364427	0.138664	0.490138
ENSMUSG00000021270.14	MGI:96250	Hsp90aa1	heat shock protein 90, alpha (cytosolic), class A member 1	-0.588763	2.35962e-05	0.000112884	0.0400908	0.773348	0.929863
ENSMUSG00000021285.16	MGI:1336199	Ppp1r13b	protein phosphatase 1, regulatory subunit 13B	-0.985555	1.23515e-09	1.62267e-08	-0.465936	0.00401123	0.0854056
ENSMUSG00000021288.20	MGI:107978	Klc1	kinesin light chain 1	-0.682832	2.94447e-06	1.72572e-05	0.164122	0.26082	0.637638
ENSMUSG00000021301.10	MGI:2444115	Hecw1	HECT, C2 and WW domain containing E3 ubiquitin protein ligase 1	-0.686309	0.000217106	0.000823733	-0.232648	0.208944	0.583198
ENSMUSG00000021313.17	MGI:99685	Ryr2	ryanodine receptor 2, cardiac	-1.46034	2.28016e-05	0.000109502	-0.270716	0.432208	0.768475
ENSMUSG00000021314.14	MGI:103574	Amph	amphiphysin	-1.48985	8.92032e-09	9.50895e-08	-0.147467	0.568864	0.846836
ENSMUSG00000021385.11	MGI:1922928	Ippk	inositol 1,3,4,5,6-pentakisphosphate 2-kinase	-0.775956	0.000150377	0.000592071	-0.470753	0.0212723	0.211018
ENSMUSG00000021395.12	MGI:109242	Spin1	spindlin 1	-0.786472	1.63824e-08	1.63488e-07	-0.13253	0.340588	0.705733
ENSMUSG00000021476.10	MGI:1891713	Habp4	hyaluronic acid binding protein 4	-0.750933	3.40192e-10	5.17702e-09	-0.0940381	0.430443	0.76735
ENSMUSG00000021534.9	MGI:1916565	1700001L19Rik	RIKEN cDNA 1700001L19 gene	-1.63287	2.97753e-05	0.000138844	0.427546	0.24007	0.617782
ENSMUSG00000021536.8	MGI:99676	Adcy2	adenylate cyclase 2	-1.07236	2.50834e-05	0.000119049	-0.184004	0.469262	0.792445
ENSMUSG00000021557.16	MGI:2159437	Agtpbp1	ATP/GTP binding protein 1	-0.942639	1.08165e-07	9.00466e-07	-0.0220111	0.901148	0.973842
ENSMUSG00000021559.15	MGI:1916885	Dapk1	death associated protein kinase 1	-1.17288	8.2581e-08	7.04817e-07	-0.492332	0.0243106	0.224108
ENSMUSG00000021573.16	MGI:1920198	Tppp	tubulin polymerization promoting protein	-1.0949	1.39913e-11	2.91698e-10	-0.233545	0.14921	0.505276
ENSMUSG00000021596.17	MGI:1926021	Mctp1	multiple C2 domains, transmembrane 1	-0.996576	2.33992e-05	0.000112054	-0.460167	0.0505502	0.315168
ENSMUSG00000021662.12	MGI:1346016	Arhgef28	Rho guanine nucleotide exchange factor (GEF) 28	-1.30473	2.53603e-07	1.93796e-06	-0.407847	0.106302	0.436335
ENSMUSG00000021671.10	MGI:1914713	Poc5	POC5 centriolar protein	-0.633679	6.0788e-11	1.09981e-09	-0.213721	0.0255868	0.230571
ENSMUSG00000021676.11	MGI:2449975	Iqgap2	IQ motif containing GTPase activating protein 2	-1.50212	3.60933e-06	2.07108e-05	-0.473586	0.143751	0.496711
ENSMUSG00000021687.15	MGI:1349480	Scamp1	secretory carrier membrane protein 1	-0.646841	6.52153e-09	7.18892e-08	-0.269086	0.0156791	0.182625
ENSMUSG00000021699.18	MGI:99555	Pde4d	phosphodiesterase 4D, cAMP specific	-0.692301	1.96926e-05	9.58834e-05	-0.154483	0.339365	0.704966
ENSMUSG00000021700.11	MGI:1914545	Rab3c	RAB3C, member RAS oncogene family	-1.97239	9.1643e-10	1.24488e-08	0.227106	0.480336	0.799837
ENSMUSG00000021708.19	MGI:109137	Rasgrf2	RAS protein-specific guanine nucleotide-releasing factor 2	-1.32854	9.25209e-08	7.82457e-07	-0.864969	0.000500352	0.0249127
ENSMUSG00000021712.16	MGI:1933161	Trim23	tripartite motif-containing 23	-0.823853	1.85007e-10	2.99709e-09	-0.191656	0.136564	0.487221
ENSMUSG00000021719.10	MGI:106334	Rgs7bp	regulator of G-protein signalling 7 binding protein	-1.16319	6.39073e-06	3.46659e-05	-0.355782	0.167324	0.532073
ENSMUSG00000021721.6	MGI:96273	Htr1a	5-hydroxytryptamine (serotonin) receptor 1A	-1.82112	0.00198943	0.00600544	0.102108	0.86194	0.960426
ENSMUSG00000021730.9	MGI:1096392	Hcn1	hyperpolarization activated cyclic nucleotide gated potassium channel 1	-1.5586	1.72752e-06	1.07932e-05	0.313896	0.333529	0.699933
ENSMUSG00000021732.15	MGI:1099809	Fgf10	fibroblast growth factor 10	-3.02895	9.14443e-09	9.70183e-08	-0.397617	0.439485	0.773058
ENSMUSG00000021747.13	MGI:1926154	Cfap20dc	CFAP20 domain containing	-1.22961	5.90373e-11	1.06962e-09	-0.159124	0.372886	0.727553
ENSMUSG00000021752.15	MGI:1918643	Kctd6	potassium channel tetramerisation domain containing 6	-0.590958	0.00228913	0.00678205	-0.0143202	0.940866	0.985167
ENSMUSG00000021772.16	MGI:1916971	Nkiras1	NFKB inhibitor interacting Ras-like protein 1	-0.895527	1.35412e-13	4.40472e-12	-0.140055	0.24391	0.621484
ENSMUSG00000021775.12	MGI:2449205	Nr1d2	nuclear receptor subfamily 1, group D, member 2	-0.752273	0.000258018	0.000962085	-0.262327	0.202149	0.574869
ENSMUSG00000021779.20	MGI:98743	Thrb	thyroid hormone receptor beta	-1.01157	3.88066e-07	2.84243e-06	-0.146983	0.457531	0.784114
ENSMUSG00000021798.15	MGI:1344412	Ldb3	LIM domain binding 3	-0.60405	3.14884e-06	1.82984e-05	-0.111363	0.38442	0.734173
ENSMUSG00000021816.12	MGI:107163	Ppp3cb	protein phosphatase 3, catalytic subunit, beta isoform	-1.17351	2.21879e-11	4.4239e-10	-0.236638	0.176898	0.545939
ENSMUSG00000021892.15	MGI:1344391	Sh3bp5	SH3-domain binding protein 5 (BTK-associated)	-0.84872	7.0817e-07	4.85807e-06	-0.251944	0.140421	0.492533
ENSMUSG00000021895.11	MGI:1918954	Arhgef3	Rho guanine nucleotide exchange factor (GEF) 3	-0.969928	5.18169e-09	5.87378e-08	-0.52237	0.0016355	0.0514488
ENSMUSG00000021930.15	MGI:1913924	Spryd7	SPRY domain containing 7	-0.778005	4.13727e-09	4.79974e-08	-0.200363	0.128094	0.472646
ENSMUSG00000021936.15	MGI:1346861	Mapk8	mitogen-activated protein kinase 8	-0.984223	1.31341e-10	2.19444e-09	-0.103002	0.499439	0.810867
ENSMUSG00000021943.8	MGI:95684	Gdf10	growth differentiation factor 10	-1.83767	2.79512e-09	3.35357e-08	-0.950628	0.00160752	0.0508982
ENSMUSG00000021959.17	MGI:1354386	Lats2	large tumor suppressor 2	-0.797478	0.000164584	0.000641719	-0.248236	0.240903	0.618887
ENSMUSG00000021974.16	MGI:104723	Fgf9	fibroblast growth factor 9	-1.02719	3.06384e-11	5.93601e-10	-0.126936	0.394239	0.740551
ENSMUSG00000021982.15	MGI:1919141	Cdadc1	cytidine and dCMP deaminase domain containing 1	-0.640885	1.80792e-08	1.78802e-07	-0.103779	0.359336	0.719752
ENSMUSG00000021986.10	MGI:1919375	Amer2	APC membrane recruitment 2	-0.711492	9.60308e-07	6.37936e-06	-0.1254	0.386914	0.735541
ENSMUSG00000021991.10	MGI:1338890	Cacna2d3	calcium channel, voltage-dependent, alpha2/delta subunit 3	-1.03726	6.90383e-07	4.74624e-06	-0.0212502	0.918839	0.978608
ENSMUSG00000022013.5	MGI:1913398	Dnajc15	DnaJ heat shock protein family (Hsp40) member C15	-0.662248	4.43024e-10	6.56685e-09	-0.104671	0.322486	0.690362
ENSMUSG00000022016.18	MGI:2684060	Akap11	A kinase (PRKA) anchor protein 11	-0.81341	5.00388e-07	3.55122e-06	-0.158223	0.327911	0.695078
ENSMUSG00000022024.11	MGI:1915205	Sugt1	SGT1, suppressor of G2 allele of SKP1 (S. cerevisiae)	-0.648906	1.77375e-11	3.60399e-10	-0.197946	0.0396372	0.283203
ENSMUSG00000022061.9	MGI:97352	Nkx3-1	NK3 homeobox 1	-1.89541	0.000130543	0.000522155	-0.914446	0.0441307	0.296447
ENSMUSG00000022097.5	MGI:109517	Sftpc	surfactant associated protein C	-1.46783	0.00270903	0.00787685	-0.0550203	0.904771	0.974565
ENSMUSG00000022099.18	MGI:99670	Dmtn	dematin actin binding protein	-0.965199	2.31915e-06	1.39649e-05	-0.115158	0.57285	0.84942
ENSMUSG00000022139.18	MGI:2145597	Mbnl2	muscleblind like splicing factor 2	-0.725378	4.5996e-10	6.75674e-09	-0.39703	0.00064309	0.0288873
ENSMUSG00000022176.12	MGI:2155260	Rem2	rad and gem related GTP binding protein 2	-2.0337	2.5893e-08	2.46107e-07	-0.141313	0.694412	0.904079
ENSMUSG00000022201.17	MGI:1341890	Zfr	zinc finger RNA binding protein	-0.675975	7.80571e-09	8.40173e-08	-0.142282	0.223926	0.600774
ENSMUSG00000022205.16	MGI:104811	Sub1	SUB1 homolog, transcriptional regulator	-0.820904	5.3721e-11	9.83762e-10	-0.170321	0.172371	0.538509
ENSMUSG00000022206.8	MGI:97373	Npr3	natriuretic peptide receptor 3	-2.60013	2.94814e-06	1.72751e-05	0.268699	0.622065	0.873155
ENSMUSG00000022208.13	MGI:2443113	Jph4	junctophilin 4	-1.48989	8.81511e-06	4.64249e-05	-0.164952	0.622549	0.873301
ENSMUSG00000022211.10	MGI:2448573	Carmil3	capping protein regulator and myosin 1 linker 3	-0.880071	1.26204e-05	6.42202e-05	0.409211	0.0409291	0.286393
ENSMUSG00000022212.16	MGI:1334445	Cpne6	copine VI	-1.5352	4.26921e-07	3.08927e-06	-0.175945	0.562068	0.843551
ENSMUSG00000022223.10	MGI:1916876	Sdr39u1	short chain dehydrogenase/reductase family 39U, member 1	-0.813752	9.41657e-07	6.26849e-06	-0.0730176	0.658405	0.889773
ENSMUSG00000022257.5	MGI:1890494	Laptm4b	lysosomal-associated protein transmembrane 4B	-0.889503	2.05817e-11	4.12365e-10	-0.222498	0.0925812	0.413891
ENSMUSG00000022285.18	MGI:109484	Ywhaz	tyrosine 3-monooxygenase/tryptophan 5-monooxygenase activation protein, zeta polypeptide	-0.608911	2.77078e-08	2.6223e-07	-0.143696	0.189686	0.561853
ENSMUSG00000022292.17	MGI:2155865	Rrm2b	ribonucleotide reductase M2 B (TP53 inducible)	-0.665737	2.2479e-10	3.56922e-09	-0.252023	0.0156645	0.182625
ENSMUSG00000022306.10	MGI:1334444	Zfpm2	zinc finger protein, multitype 2	-0.82883	0.00197644	0.00596985	-0.101354	0.704619	0.906967
ENSMUSG00000022307.17	MGI:2179326	Oxr1	oxidation resistance 1	-0.807688	2.12925e-05	0.00010289	-0.0176843	0.925746	0.980912
ENSMUSG00000022324.16	MGI:109613	Matn2	matrilin 2	-1.64611	1.25085e-05	6.373e-05	-0.294591	0.433298	0.769196
ENSMUSG00000022332.9	MGI:1313312	Khdrbs3	KH domain containing, RNA binding, signal transduction associated 3	-1.71088	5.45581e-10	7.85238e-09	-0.00357986	0.989613	0.997579
ENSMUSG00000022338.9	MGI:1919286	Eny2	ENY2 transcription and export complex 2 subunit	-0.672219	6.49368e-12	1.43937e-10	-0.291931	0.0027378	0.0689522
ENSMUSG00000022340.16	MGI:2442392	Sybu	syntabulin (syntaxin-interacting)	-0.857957	3.88949e-05	0.000177092	-0.196459	0.345561	0.710551
ENSMUSG00000022342.7	MGI:1914748	Kcnv1	potassium channel, subfamily V, member 1	-1.38681	3.30311e-06	1.91138e-05	-0.440382	0.138427	0.490138
ENSMUSG00000022389.16	MGI:98663	Tef	thyrotroph embryonic factor	-1.3995	9.91004e-09	1.04287e-07	-0.390053	0.109917	0.442461
ENSMUSG00000022419.17	MGI:2146322	Deptor	DEP domain containing MTOR-interacting protein	-0.598745	0.00237214	0.006997	0.261816	0.178949	0.54877
ENSMUSG00000022454.18	MGI:1858510	Nell2	NEL-like 2	-1.00551	4.06047e-08	3.70516e-07	-0.308985	0.0916315	0.411515
ENSMUSG00000022456.19	MGI:1345148	Septin3	septin 3	-1.04158	1.06042e-07	8.84586e-07	-0.214942	0.272462	0.648081
ENSMUSG00000022464.15	MGI:1916604	Slc38a4	solute carrier family 38, member 4	-1.93085	0.000597531	0.00205052	0.695285	0.147611	0.502652
ENSMUSG00000022474.16	MGI:1353418	Pmm1	phosphomannomutase 1	-0.615363	1.75477e-07	1.39311e-06	-0.202785	0.0844387	0.398217
ENSMUSG00000022494.16	MGI:1919805	Shisa9	shisa family member 9	-0.628333	0.001794	0.00546945	-0.499889	0.0128794	0.163771
ENSMUSG00000022523.11	MGI:109183	Fgf12	fibroblast growth factor 12	-1.15325	2.17237e-12	5.342e-11	0.00990587	0.951617	0.988037
ENSMUSG00000022525.14	MGI:1351473	Plaat1	phospholipase A and acyltransferase 1	-1.23152	1.0634e-07	8.86557e-07	-0.428679	0.060829	0.342296
ENSMUSG00000022540.17	MGI:1913299	Rogdi	rogdi homolog	-0.829577	0.000437712	0.00155053	-0.275782	0.242221	0.620245
ENSMUSG00000022577.18	MGI:1346030	Ly6h	lymphocyte antigen 6 complex, locus H	-0.775868	0.00175093	0.0053489	0.398109	0.107497	0.439496
ENSMUSG00000022594.15	MGI:1345180	Lynx1	Ly6/neurotoxin 1	-0.840416	2.63015e-05	0.000124154	0.0395785	0.843007	0.954521
ENSMUSG00000022601.12	MGI:2443876	Zbtb11	zinc finger and BTB domain containing 11	-0.829348	7.97204e-10	1.10377e-08	-0.122812	0.360091	0.720179
ENSMUSG00000022604.19	MGI:1921451	Cep97	centrosomal protein 97	-0.655217	1.94105e-06	1.19431e-05	-0.0940428	0.492019	0.805809
ENSMUSG00000022619.6	MGI:1926555	Mapk8ip2	mitogen-activated protein kinase 8 interacting protein 2	-0.974931	3.57706e-06	2.05338e-05	-0.0733074	0.727298	0.914908
ENSMUSG00000022623.18	MGI:1930016	Shank3	SH3 and multiple ankyrin repeat domains 3	-0.69946	1.58611e-05	7.89107e-05	0.0836152	0.605634	0.866238
ENSMUSG00000022629.18	MGI:109188	Kif21a	kinesin family member 21A	-0.705196	7.04786e-11	1.25634e-09	-0.151483	0.160417	0.522056
ENSMUSG00000022634.10	MGI:1914307	Yaf2	YY1 associated factor 2	-0.60223	2.7753e-08	2.62572e-07	-0.207876	0.0546161	0.326083
ENSMUSG00000022674.16	MGI:1917870	Ube2v2	ubiquitin-conjugating enzyme E2 variant 2	-0.703046	5.29619e-11	9.7241e-10	-0.145475	0.171961	0.538041
ENSMUSG00000022679.14	MGI:2135951	Mpv17l	Mpv17 transgene, kidney disease mutant-like	-0.667728	7.90451e-07	5.35359e-06	-0.308041	0.0225641	0.216205
ENSMUSG00000022696.18	MGI:2443155	Sidt1	SID1 transmembrane family, member 1	-1.24753	3.34322e-07	2.4827e-06	-0.579104	0.0176119	0.193263
ENSMUSG00000022750.19	MGI:1337995	Klhl22	kelch-like 22	-0.621439	6.55352e-08	5.73976e-07	-0.0942907	0.410709	0.753215
ENSMUSG00000022752.10	MGI:106295	Tomm70a	translocase of outer mitochondrial membrane 70A	-0.707249	2.55372e-09	3.10144e-08	-0.186542	0.115506	0.450798
ENSMUSG00000022761.13	MGI:1914113	Lztr1	leucine-zipper-like transcriptional regulator, 1	-0.866442	1.52094e-12	3.88961e-11	-0.0231024	0.850073	0.956346
ENSMUSG00000022763.19	MGI:1919418	Aifm3	apoptosis-inducing factor, mitochondrion-associated 3	-1.90961	1.05309e-06	6.93011e-06	-0.275437	0.480038	0.799599
ENSMUSG00000022773.20	MGI:1913303	Ypel1	yippee like 1	-1.19404	4.34372e-05	0.000195301	-0.0578445	0.842171	0.95412
ENSMUSG00000022789.16	MGI:1921256	Dnm1l	dynamin 1-like	-0.69295	1.4906e-10	2.46047e-09	-0.186791	0.0835901	0.396101
ENSMUSG00000022791.20	MGI:1858308	Tnk2	tyrosine kinase, non-receptor, 2	-0.701379	2.53221e-05	0.000120122	0.0596557	0.719938	0.913932
ENSMUSG00000022797.17	MGI:98822	Tfrc	transferrin receptor	-0.737666	1.60377e-07	1.28637e-06	-0.510174	0.000284063	0.0170133
ENSMUSG00000022811.18	MGI:1332234	Zfp148	zinc finger protein 148	-0.736507	1.18513e-08	1.22388e-07	-0.297991	0.0208881	0.209316
ENSMUSG00000022812.15	MGI:1861437	Gsk3b	glycogen synthase kinase 3 beta	-0.615252	1.77271e-08	1.7569e-07	-0.140899	0.196282	0.569177
ENSMUSG00000022829.15	MGI:2443815	Stxbp5l	syntaxin binding protein 5-like	-1.36235	1.85295e-06	1.14796e-05	-0.180632	0.526413	0.824276
ENSMUSG00000022837.15	MGI:2443764	Iqcb1	IQ calmodulin-binding motif containing 1	-0.842961	9.75929e-11	1.67733e-09	-0.0908112	0.477329	0.798174
ENSMUSG00000022847.16	MGI:101875	Thpo	thrombopoietin	-0.999224	0.00122198	0.00388999	-0.119082	0.697707	0.904833
ENSMUSG00000022861.18	MGI:105060	Dgkg	diacylglycerol kinase, gamma	-1.21534	6.83458e-06	3.68857e-05	0.0329845	0.902678	0.974227
ENSMUSG00000022883.12	MGI:1274781	Robo1	roundabout guidance receptor 1	-1.73091	3.93015e-11	7.41472e-10	-0.319508	0.220368	0.597051
ENSMUSG00000022884.17	MGI:106906	Eif4a2	eukaryotic translation initiation factor 4A2	-0.744933	2.30708e-10	3.6505e-09	-0.254425	0.030281	0.251587
ENSMUSG00000022914.18	MGI:1890651	Brwd1	bromodomain and WD repeat domain containing 1	-0.602911	6.3788e-08	5.60011e-07	-0.173084	0.119798	0.459648
ENSMUSG00000022935.17	MGI:95814	Grik1	glutamate receptor, ionotropic, kainate 1	-1.57958	1.27962e-05	6.50342e-05	0.572291	0.102975	0.431522
ENSMUSG00000022948.17	MGI:2136890	Setd4	SET domain containing 4	-0.694079	0.00015886	0.000621421	0.0224926	0.90175	0.97394
ENSMUSG00000022957.21	MGI:1338069	Itsn1	intersectin 1 (SH3 domain protein 1A)	-0.903707	4.40389e-07	3.17635e-06	-0.0695842	0.697009	0.904833
ENSMUSG00000022973.19	MGI:1354961	Synj1	synaptojanin 1	-1.12053	1.02708e-08	1.07672e-07	-0.114289	0.558909	0.841377
ENSMUSG00000023011.9	MGI:1919643	Faim2	Fas apoptotic inhibitory molecule 2	-1.72779	5.44991e-08	4.85347e-07	-0.257062	0.418399	0.758376
ENSMUSG00000023032.13	MGI:1928745	Slc4a8	solute carrier family 4 (anion exchanger), member 8	-0.988656	6.70135e-11	1.20127e-09	-0.12315	0.414969	0.755767
ENSMUSG00000023033.15	MGI:103169	Scn8a	sodium channel, voltage-gated, type VIII, alpha	-1.3718	8.04472e-10	1.11223e-08	-0.305459	0.171041	0.536525
ENSMUSG00000023050.10	MGI:1346881	Map3k12	mitogen-activated protein kinase kinase kinase 12	-0.836085	2.15696e-07	1.67317e-06	-0.139805	0.385073	0.734678
ENSMUSG00000023236.8	MGI:98289	Scg5	secretogranin V	-1.08031	9.75623e-11	1.67733e-09	-0.0517562	0.755759	0.923056
ENSMUSG00000023353.15	MGI:2183446	Agap3	ArfGAP with GTPase domain, ankyrin repeat and PH domain 3	-1.03056	1.56607e-07	1.25929e-06	-0.0243833	0.901137	0.973842
ENSMUSG00000023391.9	MGI:94902	Dlx2	distal-less homeobox 2	-2.45981	1.17801e-05	6.03069e-05	0.554764	0.278088	0.653917
ENSMUSG00000023473.14	MGI:1858236	Celsr3	cadherin, EGF LAG seven-pass G-type receptor 3	-0.837839	0.00031638	0.00115676	0.022398	0.923235	0.98051
ENSMUSG00000023571.5	MGI:1914639	C1qtnf12	C1q and tumor necrosis factor related 12	-0.601361	0.000359558	0.00129797	0.15976	0.332976	0.699445
ENSMUSG00000023826.17	MGI:1355296	Prkn	parkin RBR E3 ubiquitin protein ligase	-0.795577	8.43459e-05	0.000353337	-0.138391	0.483747	0.80235
ENSMUSG00000023868.18	MGI:1345143	Pde10a	phosphodiesterase 10A	-0.656514	1.37842e-06	8.80325e-06	-0.304156	0.0250756	0.227665
ENSMUSG00000023886.11	MGI:1929881	Smoc2	SPARC related modular calcium binding 2	-1.00718	0.0021775	0.00649211	-0.0967982	0.767917	0.927407
ENSMUSG00000023912.11	MGI:1921261	Slc25a27	solute carrier family 25, member 27	-0.776445	3.93886e-05	0.000179029	-0.0926772	0.622316	0.873155
ENSMUSG00000023927.16	MGI:105084	Satb1	special AT-rich sequence binding protein 1	-0.983832	7.79169e-13	2.11885e-11	0.0544039	0.689378	0.902125
ENSMUSG00000023960.14	MGI:1933830	Enpp5	ectonucleotide pyrophosphatase/phosphodiesterase 5	-0.657578	7.54717e-08	6.5168e-07	-0.0264212	0.828645	0.948919
ENSMUSG00000023968.16	MGI:2152434	Crip3	cysteine-rich protein 3	-1.00072	0.00217518	0.00648653	0.512701	0.0843038	0.397982
ENSMUSG00000023991.17	MGI:1921373	Foxp4	forkhead box P4	-1.14851	6.80946e-06	3.67639e-05	0.163886	0.51853	0.820334
ENSMUSG00000024008.17	MGI:2385908	Cpne5	copine V	-2.2266	3.58523e-12	8.38622e-11	-0.204347	0.513724	0.817875
ENSMUSG00000024044.20	MGI:103008	Epb41l3	erythrocyte membrane protein band 4.1 like 3	-0.834484	5.05612e-06	2.80883e-05	-0.00747558	0.967339	0.9919
ENSMUSG00000024074.9	MGI:1354756	Crim1	cysteine rich transmembrane BMP regulator 1 (chordin like)	-0.769897	1.21812e-06	7.88094e-06	-0.302334	0.0563232	0.329877
ENSMUSG00000024076.11	MGI:1921449	Vit	vitrin	-1.88108	0.00221167	0.0065824	-0.142854	0.813691	0.944308
ENSMUSG00000024083.17	MGI:2159342	Pja2	praja ring finger ubiquitin ligase 2	-1.24556	2.66226e-10	4.15153e-09	-0.295571	0.133669	0.481762
ENSMUSG00000024122.17	MGI:1338068	Pdpk1	3-phosphoinositide dependent protein kinase 1	-0.650538	1.89286e-06	1.16866e-05	-0.216877	0.111892	0.444878
ENSMUSG00000024127.16	MGI:2441932	Prepl	prolyl endopeptidase-like	-0.854148	4.79536e-08	4.31687e-07	-0.0452777	0.772091	0.929542
ENSMUSG00000024163.18	MGI:1353598	Mapk8ip3	mitogen-activated protein kinase 8 interacting protein 3	-0.715213	7.08456e-11	1.26132e-09	-0.0534173	0.626056	0.875039
ENSMUSG00000024172.11	MGI:2445190	St6gal2	beta galactoside alpha 2,6 sialyltransferase 2	-1.20244	8.99246e-08	7.61722e-07	-0.31851	0.152192	0.51039
ENSMUSG00000024186.16	MGI:1354739	Rgs11	regulator of G-protein signaling 11	-1.52476	9.63853e-10	1.30254e-08	0.0320256	0.896901	0.972639
ENSMUSG00000024242.16	MGI:2154405	Map4k3	mitogen-activated protein kinase kinase kinase kinase 3	-0.863819	5.17511e-11	9.52002e-10	-0.0403476	0.758278	0.92405
ENSMUSG00000024245.5	MGI:1915277	Tmem178	transmembrane protein 178	-1.08596	1.21676e-08	1.25295e-07	-0.299961	0.114335	0.449105
ENSMUSG00000024261.7	MGI:101759	Syt4	synaptotagmin IV	-0.787138	2.58995e-06	1.54021e-05	-0.156913	0.347774	0.711772
ENSMUSG00000024268.17	MGI:1932407	Celf4	CUGBP, Elav-like family member 4	-1.41307	2.77023e-06	1.6366e-05	0.0901875	0.764698	0.926092
ENSMUSG00000024269.12	MGI:1913898	Tpgs2	tubulin polyglutamylase complex subunit 2	-0.610396	1.26102e-08	1.29298e-07	-0.0154715	0.884368	0.96804
ENSMUSG00000024403.17	MGI:1913487	Atp6v1g2	ATPase, H+ transporting, lysosomal V1 subunit G2	-1.18761	1.37571e-09	1.78912e-08	-0.0477404	0.807423	0.942054
ENSMUSG00000024424.16	MGI:1919997	Ttc39c	tetratricopeptide repeat domain 39C	-1.05565	4.74935e-06	2.6574e-05	-0.189163	0.409819	0.752652
ENSMUSG00000024462.18	MGI:1860139	Gabbr1	gamma-aminobutyric acid (GABA) B receptor, 1	-0.669715	8.77033e-06	4.6206e-05	-0.109602	0.466782	0.790528
ENSMUSG00000024479.4	MGI:2146021	Mal2	mal, T cell differentiation protein 2	-1.38816	2.90757e-06	1.70628e-05	-0.158542	0.59277	0.861212
ENSMUSG00000024500.21	MGI:1920180	Ppp2r2b	protein phosphatase 2, regulatory subunit B, beta	-0.659759	0.000550233	0.00190457	0.237682	0.212012	0.587405
ENSMUSG00000024502.11	MGI:1923467	Jakmip2	janus kinase and microtubule interacting protein 2	-0.730578	1.73231e-08	1.72041e-07	-0.0940972	0.465766	0.789436
ENSMUSG00000024511.16	MGI:1931295	Rab27b	RAB27B, member RAS oncogene family	-1.47798	9.72427e-09	1.0252e-07	0.00716345	0.977632	0.994184
ENSMUSG00000024530.9	MGI:2442865	Prelid3a	PRELI domain containing 3A	-0.769138	6.45061e-08	5.65652e-07	-0.247058	0.0805916	0.3909
ENSMUSG00000024548.12	MGI:1933199	Setbp1	SET binding protein 1	-0.732723	3.92617e-05	0.000178508	-0.251331	0.157515	0.518345
ENSMUSG00000024581.14	MGI:104561	Napg	N-ethylmaleimide sensitive fusion protein attachment protein gamma	-0.853039	2.33358e-09	2.86309e-08	-0.058242	0.682804	0.899336
ENSMUSG00000024589.19	MGI:1933754	Nedd4l	neural precursor cell expressed, developmentally down-regulated gene 4-like	-0.965816	0.000143057	0.000566694	-0.428853	0.0911698	0.410111
ENSMUSG00000024617.17	MGI:88256	Camk2a	calcium/calmodulin-dependent protein kinase II alpha	-1.17674	1.03874e-05	5.3877e-05	-0.463688	0.0823227	0.394032
ENSMUSG00000024639.6	MGI:95776	Gnaq	guanine nucleotide binding protein, alpha q polypeptide	-0.785934	2.62468e-13	7.99944e-12	-0.296976	0.00567587	0.10388
ENSMUSG00000024758.16	MGI:1339970	Rtn3	reticulon 3	-0.813949	2.82971e-09	3.39365e-08	-0.0934631	0.494945	0.808372
ENSMUSG00000024767.12	MGI:2147616	Otub1	OTU domain, ubiquitin aldehyde binding 1	-0.698997	1.31493e-09	1.71574e-08	-0.158129	0.168878	0.533711
ENSMUSG00000024798.16	MGI:99841	Htr7	5-hydroxytryptamine (serotonin) receptor 7	-2.38959	5.73384e-07	4.00506e-06	0.0429775	0.926137	0.98092
ENSMUSG00000024843.16	MGI:107760	Chka	choline kinase alpha	-0.655274	1.50094e-08	1.51415e-07	-0.13422	0.243648	0.621095
ENSMUSG00000024862.17	MGI:107953	Klc2	kinesin light chain 2	-0.977922	1.01176e-13	3.36914e-12	0.00416962	0.974617	0.993661
ENSMUSG00000024873.8	MGI:1277225	Cnih2	cornichon family AMPA receptor auxiliary protein 2	-0.911838	6.77194e-07	4.66672e-06	-0.119395	0.515187	0.818501
ENSMUSG00000024883.9	MGI:2385695	Rin1	Ras and Rab interactor 1	-0.676587	0.000361114	0.0013031	0.17249	0.362416	0.721173
ENSMUSG00000024891.7	MGI:1345278	Slc29a2	solute carrier family 29 (nucleoside transporters), member 2	-0.646544	1.81874e-08	1.79571e-07	0.0714177	0.527165	0.824276
ENSMUSG00000024901.16	MGI:1924963	Peli3	pellino 3	-0.920649	2.51628e-07	1.92389e-06	0.0849922	0.629448	0.876297
ENSMUSG00000024921.18	MGI:99603	Smarca2	SWI/SNF related, matrix associated, actin dependent regulator of chromatin, subfamily a, member 2	-0.976594	9.67172e-08	8.14811e-07	-0.284317	0.120114	0.459899
ENSMUSG00000024924.15	MGI:98935	Vldlr	very low density lipoprotein receptor	-0.644987	1.89717e-05	9.2703e-05	-0.0797666	0.596082	0.862065
ENSMUSG00000024935.12	MGI:105083	Slc1a1	solute carrier family 1 (neuronal/epithelial high affinity glutamate transporter, system Xag), member 1	-0.679807	1.11532e-09	1.48559e-08	-0.278525	0.0124658	0.160988
ENSMUSG00000024957.10	MGI:1298234	Kcnk4	potassium channel, subfamily K, member 4	-3.22693	3.55536e-10	5.38943e-09	-0.898258	0.0703142	0.367177
ENSMUSG00000024968.15	MGI:1859854	Rcor2	REST corepressor 2	-0.897263	3.78083e-05	0.000172774	-0.10443	0.62929	0.876297
ENSMUSG00000024990.14	MGI:97879	Rbp4	retinol binding protein 4, plasma	-1.34791	0.00163353	0.00503247	1.32396	0.00136006	0.0459576
ENSMUSG00000025020.12	MGI:1315203	Slit1	slit guidance ligand 1	-1.4067	0.000748915	0.00251394	-0.307263	0.461408	0.786904
ENSMUSG00000025081.14	MGI:1933218	Tdrd1	tudor domain containing 1	-1.91074	0.000224503	0.000848999	-0.932053	0.0423153	0.291842
ENSMUSG00000025086.14	MGI:1919383	Trub1	TruB pseudouridine (psi) synthase family member 1	-0.635045	1.85984e-06	1.15123e-05	-0.102112	0.438614	0.772572
ENSMUSG00000025092.8	MGI:1920692	Hspa12a	heat shock protein 12A	-1.78997	8.63907e-10	1.18416e-08	-0.202061	0.488194	0.803816
ENSMUSG00000025104.14	MGI:1352760	Hdgfl3	HDGF like 3	-0.929699	8.07059e-10	1.11473e-08	-0.190538	0.206499	0.580371
ENSMUSG00000025128.8	MGI:1930001	Bhlhe22	basic helix-loop-helix family, member e22	-1.25051	2.98017e-05	0.000138922	-0.486448	0.104096	0.433569
ENSMUSG00000025175.13	MGI:1926834	Fn3k	fructosamine 3 kinase	-0.597031	1.43331e-05	7.21442e-05	-0.0100839	0.940984	0.985212
ENSMUSG00000025190.14	MGI:95791	Got1	glutamic-oxaloacetic transaminase 1, soluble	-0.78297	3.22711e-09	3.83666e-08	-0.0598553	0.650325	0.885987
ENSMUSG00000025217.16	MGI:1338871	Btrc	beta-transducin repeat containing protein	-0.647305	6.34722e-11	1.14206e-09	-0.166035	0.0916587	0.411548
ENSMUSG00000025221.17	MGI:2135916	Kcnip2	Kv channel-interacting protein 2	-1.3087	7.91979e-10	1.09706e-08	-0.470292	0.0270209	0.237588
ENSMUSG00000025235.9	MGI:2143311	Bbs4	Bardet-Biedl syndrome 4 (human)	-0.618212	3.42788e-06	1.97603e-05	-0.0627257	0.635716	0.879543
ENSMUSG00000025237.17	MGI:1914537	Parp6	poly (ADP-ribose) polymerase family, member 6	-0.613267	2.74588e-06	1.62354e-05	-0.0223889	0.863784	0.960829
ENSMUSG00000025255.19	MGI:2137668	Zfhx4	zinc finger homeodomain 4	-1.16232	4.54878e-05	0.000203389	-0.429914	0.130693	0.47759
ENSMUSG00000025264.13	MGI:1916749	Tsr2	TSR2 20S rRNA accumulation	-0.617164	1.17172e-10	1.98304e-09	-0.161665	0.0897333	0.408029
ENSMUSG00000025266.12	MGI:2448557	Gnl3l	guanine nucleotide binding protein-like 3 (nucleolar)-like	-0.676024	2.50596e-07	1.91702e-06	-0.0869656	0.506235	0.813781
ENSMUSG00000025272.17	MGI:1928994	Tro	trophinin	-0.79598	4.34296e-06	2.45195e-05	-0.0876149	0.61263	0.869059
ENSMUSG00000025318.14	MGI:1891497	Jph3	junctophilin 3	-1.0144	2.05689e-05	9.9762e-05	-0.00284598	0.990462	0.99776
ENSMUSG00000025372.17	MGI:2137336	Baiap2	brain-specific angiogenesis inhibitor 1-associated protein 2	-1.22265	1.86441e-05	9.13039e-05	-0.185652	0.515516	0.818501
ENSMUSG00000025417.9	MGI:2152214	Pip4k2c	phosphatidylinositol-5-phosphate 4-kinase, type II, gamma	-1.00075	8.27223e-12	1.79894e-10	-0.147178	0.313421	0.683722
ENSMUSG00000025422.11	MGI:3580016	Agap2	ArfGAP with GTPase domain, ankyrin repeat and PH domain 2	-0.888901	1.87155e-06	1.15737e-05	-0.173101	0.353195	0.714796
ENSMUSG00000025427.16	MGI:2444521	Rnf165	ring finger protein 165	-0.896233	1.96887e-05	9.58834e-05	-0.00597207	0.977253	0.994184
ENSMUSG00000025437.16	MGI:2159711	Usp33	ubiquitin specific peptidase 33	-0.689215	4.52839e-10	6.68477e-09	-0.226257	0.0402914	0.284338
ENSMUSG00000025468.16	MGI:1915816	Caly	calcyon neuron-specific vesicular protein	-0.887817	0.000353334	0.00127791	-0.0169716	0.94551	0.986672
ENSMUSG00000025551.14	MGI:109189	Fgf14	fibroblast growth factor 14	-1.5634	9.1622e-06	4.80682e-05	-0.189552	0.588987	0.859176
ENSMUSG00000025558.20	MGI:106321	Dock9	dedicator of cytokinesis 9	-1.06881	2.24328e-09	2.7629e-08	-0.148253	0.406457	0.750064
ENSMUSG00000025571.14	MGI:2443265	Tnrc6c	trinucleotide repeat containing 6C	-0.824349	7.9858e-07	5.40483e-06	-0.1339	0.422086	0.760797
ENSMUSG00000025576.18	MGI:106368	Rbfox3	RNA binding protein, fox-1 homolog (C. elegans) 3	-1.22439	1.33106e-05	6.73748e-05	-0.0963111	0.7318	0.916236
ENSMUSG00000025582.5	MGI:107811	Nptx1	neuronal pentraxin 1	-1.17232	0.000197857	0.00075749	-0.197189	0.531254	0.825892
ENSMUSG00000025586.18	MGI:108442	Cpeb1	cytoplasmic polyadenylation element binding protein 1	-1.10399	6.75061e-06	3.64599e-05	-0.140714	0.565414	0.845502
ENSMUSG00000025656.18	MGI:2442233	Arhgef9	CDC42 guanine nucleotide exchange factor (GEF) 9	-0.992065	2.80678e-06	1.65513e-05	-0.24069	0.255587	0.632885
ENSMUSG00000025658.17	MGI:2661175	Cnksr2	connector enhancer of kinase suppressor of Ras 2	-1.59873	1.3658e-07	1.11413e-06	-0.333307	0.271639	0.647764
ENSMUSG00000025723.13	MGI:1915289	Nmb	neuromedin B	-0.749915	0.000372662	0.00134074	-0.150554	0.458969	0.785267
ENSMUSG00000025735.14	MGI:2384891	Rhbdl1	rhomboid like 1	-0.714435	4.36192e-05	0.000195997	0.113699	0.513756	0.817875
ENSMUSG00000025738.9	MGI:2448488	Fbxl16	F-box and leucine-rich repeat protein 16	-1.15408	3.35527e-07	2.48993e-06	-0.217446	0.336293	0.701688
ENSMUSG00000025739.14	MGI:1925616	Gng13	guanine nucleotide binding protein (G protein), gamma 13	-0.83874	1.83506e-05	9.00657e-05	0.0881039	0.643302	0.882991
ENSMUSG00000025757.14	MGI:107422	Hspa4l	heat shock protein 4 like	-0.968999	1.76479e-09	2.22599e-08	-0.0609484	0.70439	0.906801
ENSMUSG00000025759.12	MGI:1919425	Mfsd8	major facilitator superfamily domain containing 8	-0.627245	3.1347e-06	1.82272e-05	-0.165183	0.216983	0.593686
ENSMUSG00000025764.15	MGI:1925835	Jade1	jade family PHD finger 1	-0.874198	6.38513e-06	3.46551e-05	0.0708948	0.712459	0.910704
ENSMUSG00000025776.14	MGI:1934666	Crispld1	cysteine-rich secretory protein LCCL domain containing 1	-2.6545	4.91069e-17	4.29439e-15	-0.580696	0.0512522	0.317644
ENSMUSG00000025777.9	MGI:1338002	Gdap1	ganglioside-induced differentiation-associated-protein 1	-1.10024	5.08425e-09	5.77037e-08	-0.174903	0.351736	0.714256
ENSMUSG00000025787.7	MGI:3027002	Tgm4	transglutaminase 4 (prostate)	-1.54842	5.91756e-05	0.000257104	-0.213775	0.548452	0.835365
ENSMUSG00000025813.15	MGI:1347354	Homer2	homer scaffolding protein 2	-1.9577	4.92653e-08	4.42527e-07	-0.384299	0.283524	0.658327
ENSMUSG00000025867.9	MGI:104726	Cplx2	complexin 2	-1.15331	2.25318e-06	1.36247e-05	-0.285361	0.2419	0.619994
ENSMUSG00000025876.16	MGI:894682	Unc5a	unc-5 netrin receptor A	-0.944563	0.00118429	0.00378172	0.169896	0.559427	0.841702
ENSMUSG00000025885.19	MGI:106598	Myo5b	myosin VB	-1.14611	0.00148126	0.00461026	-0.0879885	0.807004	0.941943
ENSMUSG00000025889.14	MGI:1277151	Snca	synuclein, alpha	-1.10149	0.000118413	0.000477283	0.0176594	0.950762	0.987844
ENSMUSG00000025907.15	MGI:1341850	Rb1cc1	RB1-inducible coiled-coil 1	-0.642671	1.47572e-08	1.4908e-07	-0.216894	0.0551306	0.327877
ENSMUSG00000025909.17	MGI:1918346	Sntg1	syntrophin, gamma 1	-1.14963	3.50013e-06	2.01364e-05	-0.202696	0.410226	0.752931
ENSMUSG00000025920.20	MGI:1352508	Stau2	staufen double-stranded RNA binding protein 2	-1.03364	6.34673e-12	1.41223e-10	-0.174996	0.243169	0.620678
ENSMUSG00000025933.16	MGI:1922962	Tmem14a	transmembrane protein 14A	-0.894315	6.21482e-12	1.3861e-10	-0.271636	0.0343012	0.266054
ENSMUSG00000025934.16	MGI:95856	Gsta3	glutathione S-transferase, alpha 3	-1.15174	0.000288077	0.00106246	-0.194004	0.503563	0.812445
ENSMUSG00000026000.17	MGI:1336997	Lancl1	LanC (bacterial lantibiotic synthetase component C)-like 1	-1.07594	8.43575e-12	1.83174e-10	-0.174702	0.266169	0.642806
ENSMUSG00000026017.14	MGI:2182269	Carf	calcium response factor	-0.752536	1.67325e-07	1.33799e-06	-0.190027	0.182405	0.552643
ENSMUSG00000026018.13	MGI:1917625	Ica1l	islet cell autoantigen 1-like	-0.884862	7.60844e-06	4.06655e-05	-0.136153	0.488929	0.804017
ENSMUSG00000026019.16	MGI:1927241	Wdr12	WD repeat domain 12	-0.617442	9.48162e-11	1.63449e-09	-0.219508	0.020347	0.206992
ENSMUSG00000026024.15	MGI:1921268	Als2	alsin Rho guanine nucleotide exchange factor	-0.622281	1.13013e-05	5.81349e-05	-0.333895	0.0183849	0.197549
ENSMUSG00000026062.13	MGI:105075	Slc9a2	solute carrier family 9 (sodium/hydrogen exchanger), member 2	-2.2847	3.7604e-06	2.14621e-05	0.0734554	0.88063	0.966509
ENSMUSG00000026065.9	MGI:105074	Slc9a4	solute carrier family 9 (sodium/hydrogen exchanger), member 4	-2.28617	4.22394e-05	0.000190601	0.103754	0.850252	0.956346
ENSMUSG00000026080.15	MGI:2138283	Chst10	carbohydrate sulfotransferase 10	-0.851509	1.45553e-11	3.01707e-10	-0.187824	0.133463	0.481536
ENSMUSG00000026103.15	MGI:95752	Gls	glutaminase	-1.04204	3.7197e-09	4.36279e-08	-0.0459513	0.794658	0.938111
ENSMUSG00000026113.18	MGI:1931123	Inpp4a	inositol polyphosphate-4-phosphatase, type I	-0.89572	1.84749e-11	3.73799e-10	-0.195939	0.140706	0.492781
ENSMUSG00000026141.14	MGI:1095415	Col19a1	collagen, type XIX, alpha 1	-2.63706	8.58642e-06	4.53201e-05	0.124182	0.831947	0.95033
ENSMUSG00000026156.9	MGI:2389490	B3gat2	beta-1,3-glucuronyltransferase 2 (glucuronosyltransferase S)	-0.980732	3.48417e-05	0.00016021	-0.171972	0.464834	0.789292
ENSMUSG00000026158.12	MGI:1917405	Ogfrl1	opioid growth factor receptor-like 1	-1.31438	7.65103e-10	1.06599e-08	-0.459079	0.0314456	0.256721
ENSMUSG00000026163.18	MGI:1924879	Sphkap	SPHK1 interactor, AKAP domain containing	-0.835424	0.000348083	0.00126161	-0.552137	0.0180771	0.196181
ENSMUSG00000026179.15	MGI:1930773	Pnkd	paroxysmal nonkinesiogenic dyskinesia	-0.913158	6.179e-14	2.17863e-12	-0.0382858	0.752297	0.922232
ENSMUSG00000026197.13	MGI:1916068	Zfand2b	zinc finger, AN1 type domain 2B	-0.68844	1.16634e-05	5.97842e-05	-0.321557	0.0396076	0.283089
ENSMUSG00000026202.14	MGI:1095410	Tuba4a	tubulin, alpha 4A	-0.875531	2.09116e-07	1.6296e-06	-0.220626	0.190549	0.56336
ENSMUSG00000026207.17	MGI:109282	Speg	SPEG complex locus	-0.774001	9.07651e-07	6.06175e-06	-0.0492493	0.754272	0.922275
ENSMUSG00000026235.15	MGI:98277	Epha4	Eph receptor A4	-0.956364	0.000239814	0.000900626	-0.330762	0.203923	0.577053
ENSMUSG00000026277.15	MGI:1891699	Stk25	serine/threonine kinase 25 (yeast)	-0.647008	1.39207e-09	1.80655e-08	-0.0466873	0.661455	0.891445
ENSMUSG00000026344.10	MGI:1919835	Lypd1	Ly6/Plaur domain containing 1	-1.86032	7.89788e-05	0.000333573	-0.418074	0.374345	0.728244
ENSMUSG00000026439.15	MGI:1918367	Rbbp5	retinoblastoma binding protein 5, histone lysine methyltransferase complex subunit	-0.659933	2.2949e-06	1.38362e-05	-0.343129	0.0138177	0.17042
ENSMUSG00000026443.4	MGI:106037	Lrrn2	leucine rich repeat protein 2, neuronal	-1.44841	7.33531e-09	7.94612e-08	-0.172247	0.491151	0.805449
ENSMUSG00000026452.16	MGI:99666	Syt2	synaptotagmin II	-2.06422	1.96862e-11	3.95525e-10	0.554806	0.0631282	0.348123
ENSMUSG00000026455.15	MGI:2385619	Klhl12	kelch-like 12	-0.639377	1.03409e-08	1.08228e-07	-0.0277583	0.802158	0.940508
ENSMUSG00000026489.14	MGI:1914676	Coq8a	coenzyme Q8A	-0.681449	0.00136617	0.00429645	0.0664836	0.754059	0.922232
ENSMUSG00000026490.19	MGI:2441841	Cdc42bpa	CDC42 binding protein kinase alpha	-0.639105	1.20991e-09	1.59387e-08	-0.258675	0.013817	0.17042
ENSMUSG00000026491.14	MGI:1915033	Ahctf1	AT hook containing transcription factor 1	-0.727434	4.75695e-07	3.4003e-06	-0.195491	0.174555	0.541737
ENSMUSG00000026494.13	MGI:2447076	Kif26b	kinesin family member 26B	-1.47752	9.18244e-05	0.000381609	-0.561883	0.136149	0.486552
ENSMUSG00000026516.9	MGI:1914709	Nvl	nuclear VCP-like	-0.615334	2.33909e-06	1.40585e-05	-0.111224	0.391951	0.739996
ENSMUSG00000026571.13	MGI:1921356	Dcaf6	DDB1 and CUL4 associated factor 6	-0.726513	7.51093e-12	1.64834e-10	-0.371924	0.000435847	0.0224688
ENSMUSG00000026576.13	MGI:88108	Atp1b1	ATPase, Na+/K+ transporting, beta 1 polypeptide	-0.786139	9.19549e-09	9.7481e-08	-0.0379731	0.781347	0.932907
ENSMUSG00000026585.14	MGI:107566	Kifap3	kinesin-associated protein 3	-0.857288	3.80314e-11	7.19869e-10	-0.137025	0.289749	0.664314
ENSMUSG00000026587.16	MGI:1098567	Astn1	astrotactin 1	-0.935892	7.46755e-09	8.07095e-08	-0.112212	0.487707	0.803816
ENSMUSG00000026603.14	MGI:1915889	Smyd2	SET and MYND domain containing 2	-0.691825	8.88596e-08	7.53265e-07	-0.21777	0.0909048	0.409518
ENSMUSG00000026610.14	MGI:1347056	Esrrg	estrogen-related receptor gamma	-1.67071	7.36555e-07	5.03359e-06	0.018451	0.955745	0.988907
ENSMUSG00000026614.8	MGI:2685058	Slc30a10	solute carrier family 30, member 10	-1.40024	2.6632e-09	3.21945e-08	-0.198813	0.390269	0.738391
ENSMUSG00000026639.19	MGI:99915	Lamb3	laminin, beta 3	-1.32542	0.00029674	0.00109147	0.0351096	0.919029	0.978608
ENSMUSG00000026667.15	MGI:1341908	Uhmk1	U2AF homology motif (UHM) kinase 1	-0.623141	4.52257e-06	2.54418e-05	-0.0160656	0.905805	0.974876
ENSMUSG00000026688.6	MGI:1913697	Mgst3	microsomal glutathione S-transferase 3	-0.869161	8.11415e-07	5.48396e-06	-0.0294064	0.866586	0.961927
ENSMUSG00000026721.17	MGI:1352507	Rabgap1l	RAB GTPase activating protein 1-like	-0.975279	1.1588e-05	5.94542e-05	0.0429039	0.846889	0.955517
ENSMUSG00000026764.16	MGI:1098269	Kif5c	kinesin family member 5C	-0.903681	5.6902e-07	3.9765e-06	-0.0130246	0.94252	0.985697
ENSMUSG00000026768.11	MGI:109442	Itga8	integrin alpha 8	-1.35857	1.56152e-05	7.78084e-05	-0.212768	0.496655	0.809289
ENSMUSG00000026782.16	MGI:106913	Abi2	abl interactor 2	-0.710616	6.2966e-09	6.96767e-08	-0.28482	0.019777	0.20453
ENSMUSG00000026811.19	MGI:1355316	St6galnac6	ST6 (alpha-N-acetyl-neuraminyl-2,3-beta-galactosyl-1,3)-N-acetylgalactosaminide alpha-2,6-sialyltransferase 6	-0.840898	1.20073e-10	2.02692e-09	-0.117065	0.368552	0.724789
ENSMUSG00000026825.18	MGI:107384	Dnm1	dynamin 1	-1.43819	5.77688e-09	6.46719e-08	-0.143662	0.56067	0.842555
ENSMUSG00000026827.13	MGI:99778	Gpd2	glycerol phosphate dehydrogenase 2, mitochondrial	-0.612392	3.92755e-07	2.87311e-06	-0.192411	0.110638	0.443388
ENSMUSG00000026833.19	MGI:1860437	Olfm1	olfactomedin 1	-1.20558	7.51039e-05	0.000319081	-0.376899	0.215725	0.592126
ENSMUSG00000026839.18	MGI:1923904	Upp2	uridine phosphorylase 2	-0.953169	5.21352e-09	5.89972e-08	-0.0491651	0.759725	0.924348
ENSMUSG00000026841.8	MGI:2138953	Fibcd1	fibrinogen C domain containing 1	-1.94591	8.17827e-07	5.52274e-06	-0.19719	0.616659	0.871283
ENSMUSG00000026854.17	MGI:1921520	Usp20	ubiquitin specific peptidase 20	-0.824761	1.5023e-12	3.84543e-11	-0.0356849	0.758412	0.924078
ENSMUSG00000026883.18	MGI:1916851	Dab2ip	disabled 2 interacting protein	-0.689897	2.24936e-06	1.36119e-05	0.0471196	0.745933	0.920632
ENSMUSG00000026885.14	MGI:1921660	Ttll11	tubulin tyrosine ligase-like family, member 11	-0.748832	5.75869e-06	3.15948e-05	-0.185484	0.259259	0.636496
ENSMUSG00000026890.20	MGI:1306803	Lhx6	LIM homeobox protein 6	-2.00886	9.34772e-09	9.89489e-08	0.227024	0.505995	0.813676
ENSMUSG00000026904.18	MGI:2150150	Slc4a10	solute carrier family 4, sodium bicarbonate cotransporter-like, member 10	-0.886235	0.000173336	0.00067229	-0.00779046	0.973647	0.993309
ENSMUSG00000026915.17	MGI:104626	Strbp	spermatid perinuclear RNA binding protein	-0.747459	1.82954e-11	3.70427e-10	-0.0275364	0.803626	0.940705
ENSMUSG00000026959.14	MGI:95819	Grin1	glutamate receptor, ionotropic, NMDA1 (zeta 1)	-0.707655	1.33474e-05	6.75255e-05	-0.113886	0.483332	0.802047
ENSMUSG00000026986.15	MGI:2153181	Hnmt	histamine N-methyltransferase	-1.01311	9.63143e-10	1.30219e-08	-0.05496	0.736091	0.917616
ENSMUSG00000027002.14	MGI:1355333	Nckap1	NCK-associated protein 1	-1.03874	1.90835e-14	7.45992e-13	-0.451222	0.000876869	0.0347102
ENSMUSG00000027010.17	MGI:1926080	Slc25a12	solute carrier family 25 (mitochondrial carrier, Aralar), member 12	-0.681295	9.44878e-07	6.2857e-06	-0.0213559	0.877622	0.965468
ENSMUSG00000027016.18	MGI:2444734	Zfp385b	zinc finger protein 385B	-1.68468	3.34341e-16	2.18125e-14	0.034136	0.865663	0.961523
ENSMUSG00000027035.11	MGI:2442564	Cers6	ceramide synthase 6	-0.881135	1.4e-07	1.13869e-06	-0.215127	0.197428	0.570583
ENSMUSG00000027104.19	MGI:109349	Atf2	activating transcription factor 2	-0.776296	1.83248e-13	5.77463e-12	-0.164716	0.116667	0.453478
ENSMUSG00000027108.16	MGI:1914309	Ola1	Obg-like ATPase 1	-0.616068	7.92207e-08	6.80782e-07	-0.211375	0.0650164	0.352863
ENSMUSG00000027134.5	MGI:2138993	Lpcat4	lysophosphatidylcholine acyltransferase 4	-0.631495	1.55578e-05	7.75892e-05	-0.0950092	0.513578	0.817875
ENSMUSG00000027203.16	MGI:1346051	Dut	deoxyuridine triphosphatase	-0.619967	0.000247893	0.000927938	0.00395745	0.981191	0.995745
ENSMUSG00000027208.15	MGI:95521	Fgf7	fibroblast growth factor 7	-2.04709	2.40315e-05	0.000114719	0.560963	0.156593	0.517129
ENSMUSG00000027244.15	MGI:1196429	Atg13	autophagy related 13	-0.630568	1.8209e-08	1.79722e-07	-0.13208	0.236731	0.614492
ENSMUSG00000027254.14	MGI:1306776	Map1a	microtubule-associated protein 1 A	-0.81516	1.49022e-06	9.43139e-06	-0.047271	0.780142	0.932335
ENSMUSG00000027270.15	MGI:1923411	Lamp5	lysosomal-associated membrane protein family, member 5	-2.64454	2.2508e-05	0.000108236	-0.530175	0.393507	0.740551
ENSMUSG00000027273.14	MGI:98331	Snap25	synaptosomal-associated protein 25	-1.53041	3.71434e-13	1.09157e-11	-0.286751	0.173316	0.539803
ENSMUSG00000027296.8	MGI:1333822	Itpka	inositol 1,4,5-trisphosphate 3-kinase A	-1.48712	9.40566e-07	6.26268e-06	-0.237082	0.433998	0.769196
ENSMUSG00000027297.16	MGI:96840	Ltk	leukocyte tyrosine kinase	-1.05959	7.45937e-05	0.000317194	-0.363326	0.168175	0.532929
ENSMUSG00000027316.16	MGI:1341873	Gfra4	glial cell line derived neurotrophic factor family receptor alpha 4	-1.10983	4.17483e-07	3.02631e-06	-0.278923	0.201584	0.574682
ENSMUSG00000027335.10	MGI:106673	Adra1d	adrenergic receptor, alpha 1d	-1.04591	8.37034e-05	0.000350997	-0.397456	0.133469	0.481536
ENSMUSG00000027347.19	MGI:1314635	Rasgrp1	RAS guanyl releasing protein 1	-1.02948	5.75501e-05	0.000250951	-0.0180874	0.943648	0.986023
ENSMUSG00000027350.9	MGI:88395	Chgb	chromogranin B	-0.862509	0.000667281	0.0022675	-0.193653	0.444796	0.776748
ENSMUSG00000027353.15	MGI:1913884	Mcm8	minichromosome maintenance 8 homologous recombination repair factor	-0.605023	0.00032967	0.00120093	-0.220549	0.189555	0.561625
ENSMUSG00000027356.9	MGI:2443583	Fermt1	fermitin family member 1	-2.43953	0.000186794	0.000718291	-1.07022	0.0441605	0.296552
ENSMUSG00000027357.17	MGI:1913836	Crls1	cardiolipin synthase 1	-0.942949	9.57261e-10	1.29484e-08	-0.318328	0.0376987	0.277269
ENSMUSG00000027359.17	MGI:1347099	Slc27a2	solute carrier family 27 (fatty acid transporter), member 2	-2.47895	1.4994e-09	1.93017e-08	-0.749587	0.052311	0.321422
ENSMUSG00000027419.10	MGI:97512	Pcsk2	proprotein convertase subtilisin/kexin type 2	-1.5798	1.73268e-07	1.38053e-06	-0.418927	0.165572	0.529929
ENSMUSG00000027430.13	MGI:1913294	Dtd1	D-tyrosyl-tRNA deacylase 1	-0.720804	3.90775e-07	2.86008e-06	-0.426319	0.00260315	0.0673203
ENSMUSG00000027438.15	MGI:104562	Napb	N-ethylmaleimide sensitive fusion protein attachment protein beta	-1.10674	1.67133e-06	1.04694e-05	0.0419645	0.855826	0.958577
ENSMUSG00000027457.16	MGI:2139270	Snph	syntaphilin	-1.08611	5.5699e-05	0.000243729	0.0564203	0.834096	0.950893
ENSMUSG00000027499.13	MGI:104747	Pkia	protein kinase inhibitor, alpha	-0.919985	0.000321026	0.00117271	-0.227382	0.373693	0.728244
ENSMUSG00000027500.11	MGI:98241	Stmn2	stathmin-like 2	-2.03387	9.75697e-09	1.02752e-07	0.0887519	0.802143	0.940508
ENSMUSG00000027525.19	MGI:1921439	Phactr3	phosphatase and actin regulator 3	-0.735361	3.34354e-08	3.11216e-07	-0.0385376	0.771632	0.929314
ENSMUSG00000027546.16	MGI:1330826	Atp9a	ATPase, class II, type 9A	-0.842832	4.51742e-10	6.672e-09	-0.0145138	0.914376	0.97776
ENSMUSG00000027568.10	MGI:97386	Ntsr1	neurotensin receptor 1	-1.89161	6.85306e-05	0.000293371	-0.529081	0.239973	0.617658
ENSMUSG00000027584.18	MGI:97440	Oprl1	opioid receptor-like 1	-1.58831	1.83475e-05	9.00657e-05	0.0589994	0.872785	0.964301
ENSMUSG00000027589.15	MGI:1923927	Pcmtd2	protein-L-isoaspartate (D-aspartate) O-methyltransferase domain containing 2	-0.707052	1.18195e-07	9.75781e-07	-0.279697	0.0356056	0.270584
ENSMUSG00000027624.21	MGI:103010	Epb41l1	erythrocyte membrane protein band 4.1 like 1	-0.84118	2.89686e-06	1.70184e-05	-0.162633	0.365625	0.723337
ENSMUSG00000027634.15	MGI:1352499	Ndrg3	N-myc downstream regulated gene 3	-0.974062	2.19164e-10	3.48759e-09	-0.280703	0.0672812	0.358907
ENSMUSG00000027636.12	MGI:1925049	Sla2	Src-like-adaptor 2	-2.28837	2.425e-05	0.000115626	-0.601489	0.197086	0.570362
ENSMUSG00000027674.17	MGI:1916672	Pex5l	peroxisomal biogenesis factor 5-like	-1.00708	0.000206647	0.000786956	0.0402828	0.881932	0.9668
ENSMUSG00000027676.12	MGI:1289263	Ccdc39	coiled-coil domain containing 39	-0.645045	4.96483e-07	3.52786e-06	-0.0286944	0.821007	0.946308
ENSMUSG00000027677.18	MGI:1914370	Ttc14	tetratricopeptide repeat domain 14	-0.830066	7.628e-07	5.19417e-06	-0.274482	0.101579	0.42967
ENSMUSG00000027692.17	MGI:1916264	Tnik	TRAF2 and NCK interacting kinase	-0.727037	2.33885e-05	0.000112021	-0.225725	0.188833	0.560627
ENSMUSG00000027748.12	MGI:109525	Trpc4	transient receptor potential cation channel, subfamily C, member 4	-1.07343	8.10933e-05	0.000341501	0.0852429	0.753265	0.922232
ENSMUSG00000027799.13	MGI:1347075	Nbea	neurobeachin	-1.13862	7.12043e-07	4.88115e-06	-0.333265	0.146574	0.500477
ENSMUSG00000027805.17	MGI:97550	Pfn2	profilin 2	-0.997091	3.52415e-10	5.34774e-09	-0.30645	0.0537227	0.324736
ENSMUSG00000027820.13	MGI:97004	Mme	membrane metallo endopeptidase	-2.3092	1.07484e-11	2.29237e-10	-0.641553	0.0470749	0.305745
ENSMUSG00000027827.18	MGI:109155	Kcnab1	potassium voltage-gated channel, shaker-related subfamily, beta member 1	-0.964345	3.40368e-05	0.000157036	-0.368112	0.113475	0.44798
ENSMUSG00000027834.16	MGI:1194506	Serpini1	serine (or cysteine) peptidase inhibitor, clade I, member 1	-1.95621	4.6124e-13	1.32836e-11	0.063556	0.813458	0.944191
ENSMUSG00000027893.15	MGI:2385184	Ahcyl1	S-adenosylhomocysteine hydrolase-like 1	-0.587336	9.14916e-09	9.70256e-08	-0.139704	0.171394	0.536836
ENSMUSG00000027950.8	MGI:87891	Chrnb2	cholinergic receptor, nicotinic, beta polypeptide 2 (neuronal)	-0.727594	8.99367e-08	7.61722e-07	-0.0538238	0.691047	0.90254
ENSMUSG00000027993.17	MGI:1933163	Trim2	tripartite motif-containing 2	-0.67324	0.00202248	0.00608925	-0.101863	0.64041	0.881551
ENSMUSG00000028004.13	MGI:108418	Npy2r	neuropeptide Y receptor Y2	-2.64778	1.30757e-06	8.4086e-06	-0.597161	0.273798	0.64888
ENSMUSG00000028005.14	MGI:1860604	Gucy1b1	guanylate cyclase 1, soluble, beta 1	-1.04459	5.90587e-09	6.59363e-08	-0.395166	0.0274697	0.239396
ENSMUSG00000028011.17	MGI:1928486	Tdo2	tryptophan 2,3-dioxygenase	-2.1209	0.00013927	0.000553305	-2.05415	0.000217995	0.0143453
ENSMUSG00000028020.17	MGI:95751	Glrb	glycine receptor, beta subunit	-0.871002	1.01222e-07	8.48067e-07	-0.220291	0.177422	0.54673
ENSMUSG00000028033.17	MGI:1924937	Kcnq5	potassium voltage-gated channel, subfamily Q, member 5	-2.53301	5.71414e-06	3.13624e-05	0.0691828	0.901041	0.973842
ENSMUSG00000028047.12	MGI:98739	Thbs3	thrombospondin 3	-0.784813	0.000216797	0.000822841	-0.102614	0.62658	0.875094
ENSMUSG00000028053.14	MGI:2183158	Ash1l	ASH1 like histone lysine methyltransferase	-0.628274	3.69296e-07	2.7167e-06	-0.171642	0.164374	0.527563
ENSMUSG00000028078.15	MGI:1918012	Dclk2	doublecortin-like kinase 2	-0.829516	1.271e-08	1.30228e-07	-0.0128644	0.929443	0.982167
ENSMUSG00000028086.16	MGI:1354695	Fbxw7	F-box and WD-40 domain protein 7	-0.619433	1.89265e-07	1.48984e-06	-0.0535091	0.651955	0.886484
ENSMUSG00000028100.12	MGI:1925623	Nudt17	nudix (nucleoside diphosphate linked moiety X)-type motif 17	-1.09392	3.24356e-08	3.02595e-07	-0.360472	0.0552909	0.327877
ENSMUSG00000028126.17	MGI:107929	Pip5k1a	phosphatidylinositol-4-phosphate 5-kinase, type 1 alpha	-0.687549	8.70422e-06	4.58997e-05	-0.265149	0.0859904	0.400817
ENSMUSG00000028132.16	MGI:1923195	Tlcd4	TLC domain containing 4	-0.796957	3.63347e-07	2.67636e-06	-0.1531	0.325535	0.693029
ENSMUSG00000028134.12	MGI:1860489	Ptbp2	polypyrimidine tract binding protein 2	-0.621998	1.45188e-06	9.2273e-06	-0.109328	0.395629	0.741755
ENSMUSG00000028161.18	MGI:107164	Ppp3ca	protein phosphatase 3, catalytic subunit, alpha isoform	-1.53526	2.81749e-07	2.13334e-06	-0.491478	0.100169	0.428523
ENSMUSG00000028176.14	MGI:2676665	Lrrc7	leucine rich repeat containing 7	-1.17307	9.22045e-07	6.1536e-06	-0.151098	0.526504	0.824276
ENSMUSG00000028180.19	MGI:1858211	Zranb2	zinc finger, RAN-binding domain containing 2	-0.595461	3.52214e-07	2.60369e-06	-0.249391	0.0326703	0.261205
ENSMUSG00000028248.16	MGI:1913875	Pnisr	PNN interacting serine/arginine-rich	-0.765496	1.53326e-06	9.67613e-06	-0.237789	0.135005	0.484982
ENSMUSG00000028266.18	MGI:109360	Lmo4	LIM domain only 4	-0.897319	2.81235e-05	0.000131828	-0.039496	0.853554	0.957855
ENSMUSG00000028307.10	MGI:87995	Aldob	aldolase B, fructose-bisphosphate	-2.13147	2.2081e-08	2.13975e-07	-0.491179	0.157113	0.518076
ENSMUSG00000028358.16	MGI:1919950	Zfp618	zinc finger protein 618	-1.6595	5.42112e-07	3.81167e-06	0.258295	0.401738	0.746504
ENSMUSG00000028360.11	MGI:3035141	Slc44a5	solute carrier family 44, member 5	-2.12764	1.92653e-09	2.41096e-08	-0.470929	0.18162	0.551651
ENSMUSG00000028399.19	MGI:97812	Ptprd	protein tyrosine phosphatase, receptor type, D	-1.05857	1.55211e-08	1.56139e-07	-0.0587915	0.75308	0.922232
ENSMUSG00000028402.19	MGI:1343489	Mpdz	multiple PDZ domain crumbs cell polarity complex component	-0.597527	2.5719e-06	1.53106e-05	-0.245721	0.0524545	0.322004
ENSMUSG00000028430.15	MGI:2140151	Nol6	nucleolar protein family 6 (RNA-associated)	-0.636371	1.05139e-08	1.09879e-07	-0.0540846	0.625856	0.875039
ENSMUSG00000028434.13	MGI:1859149	Epb41l4b	erythrocyte membrane protein band 4.1 like 4b	-0.677584	0.00291708	0.00842136	0.165548	0.465401	0.789416
ENSMUSG00000028467.16	MGI:2654325	Gba2	glucosidase beta 2	-0.68076	3.88303e-05	0.000176877	-0.244505	0.138989	0.490764
ENSMUSG00000028484.17	MGI:2142116	Psip1	PC4 and SFRS1 interacting protein 1	-0.661255	8.81572e-09	9.41489e-08	-0.13922	0.225062	0.601713
ENSMUSG00000028488.16	MGI:700009	Sh3gl2	SH3-domain GRB2-like 2	-1.62746	7.47811e-11	1.32483e-09	-0.0357719	0.886063	0.968591
ENSMUSG00000028496.18	MGI:1917372	Mllt3	myeloid/lymphoid or mixed-lineage leukemia; translocated to, 3	-0.741181	8.10495e-08	6.94424e-07	-0.108967	0.426933	0.764952
ENSMUSG00000028518.9	MGI:1336173	Prkaa2	protein kinase, AMP-activated, alpha 2 catalytic subunit	-0.86264	1.86773e-08	1.83718e-07	-0.119855	0.430736	0.767503
ENSMUSG00000028524.22	MGI:1920344	Sgip1	SH3-domain GRB2-like (endophilin) interacting protein 1	-0.965642	5.37511e-11	9.83762e-10	-0.187573	0.201692	0.574682
ENSMUSG00000028527.19	MGI:87979	Ak4	adenylate kinase 4	-1.4767	1.05763e-05	5.48072e-05	0.103528	0.756452	0.923411
ENSMUSG00000028528.18	MGI:1919935	Dnajc6	DnaJ heat shock protein family (Hsp40) member C6	-1.40292	7.34687e-09	7.95247e-08	-0.146863	0.54455	0.833525
ENSMUSG00000028532.15	MGI:2444177	Cachd1	cache domain containing 1	-1.2738	2.23456e-07	1.72731e-06	-0.231096	0.345945	0.710553
ENSMUSG00000028546.18	MGI:107427	Elavl4	ELAV like RNA binding protein 4	-2.03965	4.40039e-10	6.52933e-09	0.234519	0.468635	0.791905
ENSMUSG00000028550.16	MGI:2651854	Atg4c	autophagy related 4C, cysteine peptidase	-0.760138	6.9182e-09	7.55957e-08	-0.169228	0.19503	0.567671
ENSMUSG00000028552.14	MGI:104583	Eps15	epidermal growth factor receptor pathway substrate 15	-0.80124	6.4538e-07	4.46352e-06	-0.124541	0.438859	0.772572
ENSMUSG00000028557.11	MGI:1352759	Rnf11	ring finger protein 11	-0.605065	5.69969e-06	3.1289e-05	-0.128135	0.33617	0.701573
ENSMUSG00000028572.14	MGI:1925213	Hook1	hook microtubule tethering protein 1	-0.847837	3.53934e-05	0.000162565	-0.00992203	0.961273	0.990107
ENSMUSG00000028642.8	MGI:1922430	Tmem269	transmembrane protein 269	-0.937922	0.000709904	0.00239557	-0.390488	0.134368	0.483199
ENSMUSG00000028710.19	MGI:2180560	Atpaf1	ATP synthase mitochondrial F1 complex assembly factor 1	-0.722088	1.34524e-09	1.75052e-08	-0.027963	0.812416	0.943776
ENSMUSG00000028753.13	MGI:1922968	Vwa5b1	von Willebrand factor A domain containing 5B1	-2.1042	2.82231e-06	1.66259e-05	-1.2822	0.00362937	0.081327
ENSMUSG00000028782.15	MGI:2451244	Adgrb2	adhesion G protein-coupled receptor B2	-0.666615	0.000867904	0.00286984	-0.00496089	0.980225	0.995344
ENSMUSG00000028785.14	MGI:1336200	Hpca	hippocalcin	-1.54501	0.000169647	0.00065914	-0.348684	0.396045	0.742064
ENSMUSG00000028833.14	MGI:1347351	Ncdn	neurochondrin	-1.11512	0.000399882	0.00142884	-0.187615	0.551417	0.836804
ENSMUSG00000028838.12	MGI:1888742	Extl1	exostosin-like glycosyltransferase 1	-1.31166	6.4606e-06	3.50317e-05	-0.262207	0.366115	0.723493
ENSMUSG00000028909.18	MGI:1321151	Ptpru	protein tyrosine phosphatase, receptor type, U	-1.7569	8.33835e-05	0.000349712	0.311647	0.483726	0.80235
ENSMUSG00000028926.16	MGI:894318	Cdk14	cyclin-dependent kinase 14	-2.10752	7.46253e-12	1.63897e-10	-0.51204	0.0957803	0.420282
ENSMUSG00000028931.13	MGI:109239	Kcnab2	potassium voltage-gated channel, shaker-related subfamily, beta member 2	-1.38439	4.05688e-08	3.70306e-07	-0.389049	0.122886	0.464915
ENSMUSG00000028944.15	MGI:1336153	Prkag2	protein kinase, AMP-activated, gamma 2 non-catalytic subunit	-0.622828	0.000984593	0.00320594	0.0366685	0.845998	0.955221
ENSMUSG00000028949.14	MGI:1914243	Smarcd3	SWI/SNF related, matrix associated, actin dependent regulator of chromatin, subfamily d, member 3	-0.908005	7.85456e-07	5.32603e-06	0.131948	0.468484	0.791844
ENSMUSG00000028957.13	MGI:1277134	Per3	period circadian clock 3	-1.20652	0.000111485	0.000452086	-0.341199	0.273658	0.648762
ENSMUSG00000028971.5	MGI:109538	Cort	cortistatin	-2.48145	8.23082e-08	7.02905e-07	-0.108273	0.798546	0.940074
ENSMUSG00000028986.13	MGI:1196453	Klhl7	kelch-like 7	-0.622276	1.11952e-09	1.4905e-08	-0.130596	0.198717	0.572156
ENSMUSG00000029001.16	MGI:1354744	Fbxo44	F-box protein 44	-0.631548	9.77885e-06	5.09226e-05	0.170212	0.231527	0.60927
ENSMUSG00000029053.17	MGI:97602	Prkcz	protein kinase C, zeta	-0.941994	3.40477e-09	4.02459e-08	-0.110035	0.489255	0.804329
ENSMUSG00000029055.18	MGI:2443078	Plch2	phospholipase C, eta 2	-1.40004	2.65266e-06	1.57307e-05	0.438764	0.140166	0.492165
ENSMUSG00000029088.17	MGI:1933131	Kcnip4	Kv channel interacting protein 4	-0.941722	1.18441e-06	7.68878e-06	-0.37105	0.0550721	0.327752
ENSMUSG00000029095.18	MGI:2385758	Ablim2	actin-binding LIM protein 2	-0.814151	3.29808e-09	3.91134e-08	-0.173391	0.206467	0.580361
ENSMUSG00000029101.17	MGI:1918979	Rgs12	regulator of G-protein signaling 12	-0.722401	1.25757e-05	6.40267e-05	-0.0840784	0.610277	0.86793
ENSMUSG00000029104.16	MGI:96067	Htt	huntingtin	-0.60383	6.55782e-08	5.74178e-07	-0.194784	0.081069	0.39166
ENSMUSG00000029120.11	MGI:2442660	Ppp2r2c	protein phosphatase 2, regulatory subunit B, gamma	-0.92743	7.70102e-06	4.10993e-05	-0.0646697	0.755024	0.922658
ENSMUSG00000029121.17	MGI:107793	Crmp1	collapsin response mediator protein 1	-0.83568	1.07034e-05	5.53561e-05	-0.0709227	0.708421	0.908436
ENSMUSG00000029123.9	MGI:1927552	Stk32b	serine/threonine kinase 32B	-1.48656	0.00145375	0.00453736	0.588841	0.193401	0.565978
ENSMUSG00000029126.8	MGI:109149	Nsg1	neuron specific gene family member 1	-1.12592	4.43572e-10	6.57158e-09	0.0344212	0.84844	0.955854
ENSMUSG00000029130.13	MGI:1861747	Rnf32	ring finger protein 32	-0.879794	5.70092e-05	0.000248818	-0.168305	0.43654	0.770993
ENSMUSG00000029153.12	MGI:1916377	Ociad2	OCIA domain containing 2	-1.62949	6.01254e-08	5.30634e-07	0.14713	0.623438	0.873987
ENSMUSG00000029166.15	MGI:2140967	Mapre3	microtubule-associated protein, RP/EB family, member 3	-0.700897	5.94e-09	6.62659e-08	-0.0692125	0.564701	0.844863
ENSMUSG00000029203.17	MGI:1858216	Ube2k	ubiquitin-conjugating enzyme E2K	-0.646739	8.70776e-11	1.5147e-09	-0.211901	0.0328744	0.261968
ENSMUSG00000029211.12	MGI:95616	Gabra4	gamma-aminobutyric acid (GABA) A receptor, subunit alpha 4	-0.670335	0.00134784	0.00424322	-0.293196	0.160639	0.522391
ENSMUSG00000029245.17	MGI:99654	Epha5	Eph receptor A5	-1.35562	1.53875e-07	1.23836e-06	-0.364078	0.158413	0.519406
ENSMUSG00000029267.18	MGI:105050	Mtf2	metal response element binding transcription factor 2	-0.62323	5.90984e-06	3.23439e-05	-0.157649	0.249688	0.626966
ENSMUSG00000029283.18	MGI:1309511	Cdc7	cell division cycle 7 (S. cerevisiae)	-0.726335	4.5326e-05	0.000202779	-0.19247	0.274469	0.650013
ENSMUSG00000029287.15	MGI:104637	Tgfbr3	transforming growth factor, beta receptor III	-0.868057	1.78489e-06	1.11009e-05	-0.113627	0.526746	0.824276
ENSMUSG00000029291.12	MGI:106484	Rufy3	RUN and FYVE domain containing 3	-0.706286	1.68466e-07	1.34637e-06	-0.0271957	0.840076	0.953158
ENSMUSG00000029312.13	MGI:2179430	Klhl8	kelch-like 8	-0.761714	2.37769e-09	2.90852e-08	-0.112375	0.37294	0.727553
ENSMUSG00000029337.3	MGI:95519	Fgf5	fibroblast growth factor 5	-1.01274	1.1645e-06	7.58173e-06	-0.449088	0.0285534	0.244369
ENSMUSG00000029348.12	MGI:1920148	Asphd2	aspartate beta-hydroxylase domain containing 2	-0.944607	1.74675e-05	8.60541e-05	-0.274711	0.211328	0.586602
ENSMUSG00000029361.19	MGI:97360	Nos1	nitric oxide synthase 1, neuronal	-2.44864	3.13233e-06	1.82172e-05	0.0729839	0.889288	0.969881
ENSMUSG00000029403.15	MGI:1858227	Cdkl2	cyclin-dependent kinase-like 2 (CDC2-related kinase)	-0.885938	1.15686e-06	7.53887e-06	-0.108155	0.550485	0.83636
ENSMUSG00000029405.17	MGI:2442040	G3bp2	GTPase activating protein (SH3 domain) binding protein 2	-0.598948	2.74915e-08	2.60363e-07	-0.130939	0.223973	0.600774
ENSMUSG00000029419.9	MGI:2685842	Ajm1	apical junction component 1	-0.853137	0.000190237	0.000730457	-0.0090545	0.968364	0.992209
ENSMUSG00000029438.10	MGI:1924295	Bcl7a	B cell CLL/lymphoma 7A	-0.841564	2.34948e-06	1.41121e-05	-0.191002	0.283326	0.657942
ENSMUSG00000029449.12	MGI:1345629	Rhof	ras homolog family member F (in filopodia)	-0.811221	2.33474e-06	1.40352e-05	-0.0691988	0.685036	0.900056
ENSMUSG00000029467.16	MGI:88110	Atp2a2	ATPase, Ca++ transporting, cardiac muscle, slow twitch 2	-0.717208	1.8611e-09	2.34029e-08	-0.211154	0.0767347	0.382065
ENSMUSG00000029544.17	MGI:1352750	Cabp1	calcium binding protein 1	-0.74807	4.11926e-06	2.33705e-05	-0.0939048	0.561267	0.842917
ENSMUSG00000029576.18	MGI:2443088	Radil	Ras association and DIL domains	-1.23679	2.36286e-09	2.89284e-08	0.333237	0.0947749	0.41809
ENSMUSG00000029602.12	MGI:1330842	Rasal1	RAS protein activator like 1 (GAP1 like)	-1.78279	4.87271e-07	3.47012e-06	0.222315	0.528623	0.824924
ENSMUSG00000029651.17	MGI:1915388	Mtus2	microtubule associated tumor suppressor candidate 2	-1.30233	1.20897e-08	1.24626e-07	-0.104281	0.646269	0.883553
ENSMUSG00000029673.20	MGI:1919847	Auts2	autism susceptibility candidate 2	-0.918242	6.01124e-05	0.000260838	-0.221854	0.331819	0.698608
ENSMUSG00000029684.15	MGI:1920428	Wasl	WASP like actin nucleation promoting factor	-0.962234	2.19976e-10	3.49858e-09	-0.373375	0.0136663	0.169765
ENSMUSG00000029712.15	MGI:1933548	Actl6b	actin-like 6B	-0.945731	6.09115e-06	3.32283e-05	-0.0837539	0.688088	0.901984
ENSMUSG00000029716.14	MGI:1354956	Tfr2	transferrin receptor 2	-0.964357	0.00213351	0.00637549	0.24427	0.422933	0.761619
ENSMUSG00000029754.14	MGI:101927	Dlx6	distal-less homeobox 6	-2.3976	1.30796e-05	6.63457e-05	0.296668	0.538266	0.830413
ENSMUSG00000029755.11	MGI:101926	Dlx5	distal-less homeobox 5	-2.44422	4.16186e-07	3.01918e-06	0.522482	0.184842	0.556113
ENSMUSG00000029757.17	MGI:107743	Dync1i1	dynein cytoplasmic 1 intermediate chain 1	-1.20837	1.72357e-10	2.81115e-09	-0.199373	0.290486	0.664715
ENSMUSG00000029772.18	MGI:1921590	Ahcyl2	S-adenosylhomocysteine hydrolase-like 2	-0.766938	0.00169374	0.00519404	-0.740669	0.00243018	0.06493
ENSMUSG00000029861.18	MGI:1923406	Fam131b	family with sequence similarity 131, member B	-0.700571	4.74688e-08	4.27591e-07	-0.442115	0.00056038	0.0265577
ENSMUSG00000029862.17	MGI:88417	Clcn1	chloride channel, voltage-sensitive 1	-1.16433	3.90687e-07	2.86008e-06	0.146739	0.495735	0.80891
ENSMUSG00000029878.7	MGI:2679513	Dbpht2	DNA binding protein with his-thr domain	-1.45811	1.55769e-07	1.25325e-06	-0.805771	0.00365062	0.081549
ENSMUSG00000029916.12	MGI:1917173	Agk	acylglycerol kinase	-0.670628	1.94981e-11	3.9202e-10	-0.0230809	0.814003	0.944308
ENSMUSG00000030000.11	MGI:87919	Add2	adducin 2 (beta)	-1.20504	7.06884e-05	0.000301658	-0.472629	0.119027	0.458254
ENSMUSG00000030020.14	MGI:1925144	Prickle2	prickle planar cell polarity protein 2	-0.749967	1.14636e-05	5.88859e-05	-0.354144	0.0382361	0.278784
ENSMUSG00000030030.6	MGI:1919087	1700003E16Rik	RIKEN cDNA 1700003E16 gene	-0.594675	0.00111746	0.00359102	0.245804	0.170885	0.53638
ENSMUSG00000030058.18	MGI:1858696	Copg1	coatomer protein complex, subunit gamma 1	-0.673834	1.14326e-12	2.98753e-11	-0.0303004	0.74855	0.921603
ENSMUSG00000030067.18	MGI:1914004	Foxp1	forkhead box P1	-0.931839	9.76347e-06	5.08609e-05	-0.0854998	0.683806	0.899766
ENSMUSG00000030075.11	MGI:99534	Cntn3	contactin 3	-0.940344	1.41075e-10	2.34617e-09	-0.111387	0.439591	0.773109
ENSMUSG00000030084.12	MGI:107685	Plxna1	plexin A1	-1.0742	1.63941e-07	1.31276e-06	0.0324575	0.874097	0.96461
ENSMUSG00000030098.16	MGI:2681173	Grip2	glutamate receptor interacting protein 2	-0.741832	0.000225104	0.00085071	0.119284	0.551281	0.83672
ENSMUSG00000030102.12	MGI:96623	Itpr1	inositol 1,4,5-trisphosphate receptor 1	-1.91222	2.52542e-11	4.98689e-10	-0.655988	0.0220001	0.213769
ENSMUSG00000030126.18	MGI:2442368	Tmcc1	transmembrane and coiled coil domains 1	-0.782351	4.21048e-07	3.05061e-06	-0.15228	0.323883	0.691578
ENSMUSG00000030134.12	MGI:1917977	Rasgef1a	RasGEF domain family, member 1A	-1.61545	3.85683e-09	4.49797e-08	-0.309407	0.258858	0.636011
ENSMUSG00000030137.9	MGI:1858225	Tuba8	tubulin, alpha 8	-1.86738	5.1673e-05	0.00022767	0.577328	0.192315	0.564848
ENSMUSG00000030161.9	MGI:1914980	Gabarapl1	gamma-aminobutyric acid (GABA) A receptor-associated protein-like 1	-0.799004	8.77942e-10	1.19826e-08	-0.11463	0.378807	0.731184
ENSMUSG00000030207.16	MGI:1921775	Fam234b	family with sequence similarity 234, member B	-0.863991	1.13527e-13	3.74575e-12	-0.145278	0.211062	0.586209
ENSMUSG00000030209.15	MGI:95821	Grin2b	glutamate receptor, ionotropic, NMDA2B (epsilon 2)	-1.30154	1.87385e-06	1.15841e-05	-0.219958	0.420416	0.759959
ENSMUSG00000030222.14	MGI:2665139	Rerg	RAS-like, estrogen-regulated, growth-inhibitor	-1.98851	2.23502e-06	1.35424e-05	-0.42212	0.311601	0.681841
ENSMUSG00000030226.13	MGI:102810	Lmo3	LIM domain only 3	-1.67679	1.47031e-06	9.32182e-06	-0.460055	0.186075	0.557611
ENSMUSG00000030257.17	MGI:2152938	Srgap3	SLIT-ROBO Rho GTPase activating protein 3	-1.26724	6.3375e-08	5.57092e-07	-0.033122	0.887507	0.968859
ENSMUSG00000030268.18	MGI:104861	Bcat1	branched chain aminotransferase 1, cytosolic	-0.941502	2.36798e-10	3.73106e-09	0.0757554	0.608329	0.866652
ENSMUSG00000030279.16	MGI:1921991	C2cd5	C2 calcium-dependent domain containing 5	-0.64924	1.38726e-06	8.85381e-06	-0.0392084	0.769806	0.928684
ENSMUSG00000030283.8	MGI:106011	St8sia1	ST8 alpha-N-acetyl-neuraminide alpha-2,8-sialyltransferase 1	-1.24118	3.38867e-10	5.16122e-09	-0.194353	0.32333	0.691254
ENSMUSG00000030302.18	MGI:105368	Atp2b2	ATPase, Ca++ transporting, plasma membrane 2	-0.774784	3.22994e-05	0.000149499	-0.198147	0.287672	0.662525
ENSMUSG00000030303.16	MGI:2687035	Far2	fatty acyl CoA reductase 2	-1.16605	1.17457e-07	9.69968e-07	-0.0709796	0.742487	0.919454
ENSMUSG00000030310.11	MGI:95627	Slc6a1	solute carrier family 6 (neurotransmitter transporter, GABA), member 1	-1.06891	9.01641e-08	7.63198e-07	-0.0756651	0.704861	0.907111
ENSMUSG00000030327.9	MGI:1914852	Necap1	NECAP endocytosis associated 1	-0.837728	1.59609e-12	4.04948e-11	-0.134071	0.256947	0.634096
ENSMUSG00000030329.12	MGI:2441908	Pianp	PILR alpha associated neural protein	-1.43567	1.57593e-09	2.01875e-08	-0.1556	0.511942	0.8169
ENSMUSG00000030337.17	MGI:1313276	Vamp1	vesicle-associated membrane protein 1	-1.46015	1.40751e-13	4.54493e-12	-0.147101	0.454	0.782198
ENSMUSG00000030340.17	MGI:101782	Scnn1a	sodium channel, nonvoltage-gated 1 alpha	-1.33411	0.000388045	0.00139017	-0.45891	0.219261	0.595661
ENSMUSG00000030374.16	MGI:2142346	Strn4	striatin, calmodulin binding protein 4	-0.630965	3.12188e-06	1.81637e-05	-0.0261068	0.846882	0.955517
ENSMUSG00000030380.18	MGI:107457	Mzf1	myeloid zinc finger 1	-0.781683	2.83477e-05	0.000132768	-0.0875734	0.634452	0.879475
ENSMUSG00000030382.16	MGI:1347100	Slc27a5	solute carrier family 27 (fatty acid transporter), member 5	-1.55324	0.00105453	0.00340628	-0.542041	0.187118	0.558456
ENSMUSG00000030411.17	MGI:104296	Nova2	NOVA alternative splicing regulator 2	-0.6979	3.04191e-05	0.000141593	-0.018514	0.911733	0.976931
ENSMUSG00000030424.16	MGI:3036240	Zfp939	zinc finger protein 939	-0.622568	0.000503037	0.00175812	-0.18382	0.29653	0.670299
ENSMUSG00000030465.20	MGI:1918215	Psd3	pleckstrin and Sec7 domain containing 3	-1.36395	1.42563e-07	1.15671e-06	-0.0387382	0.881145	0.966649
ENSMUSG00000030518.18	MGI:1917888	Fam189a1	family with sequence similarity 189, member A1	-1.38224	4.75286e-06	2.65885e-05	-0.101262	0.736916	0.91794
ENSMUSG00000030525.9	MGI:99779	Chrna7	cholinergic receptor, nicotinic, alpha polypeptide 7	-1.29813	9.75667e-05	0.00040245	-0.0502456	0.879429	0.965932
ENSMUSG00000030546.15	MGI:1890505	Plin1	perilipin 1	-1.74725	0.00222543	0.00661717	-1.23483	0.0313982
ENSMUSG00000030554.17	MGI:2661187	Synm	synemin, intermediate filament protein	-0.653711	8.19547e-06	4.348e-05	-0.237301	0.104214	0.433886
ENSMUSG00000030557.18	MGI:99532	Mef2a	myocyte enhancer factor 2A	-0.721605	6.64906e-09	7.30711e-08	-0.330652	0.00782335	0.124793
ENSMUSG00000030583.17	MGI:1921456	Sipa1l3	signal-induced proliferation-associated 1 like 3	-0.961196	1.32165e-05	6.69692e-05	-0.207725	0.346224	0.710766
ENSMUSG00000030584.15	MGI:1352748	Dpf1	D4, zinc and double PHD fingers family 1	-0.76369	7.52801e-05	0.00031964	-0.244328	0.204076	0.577162
ENSMUSG00000030621.18	MGI:1916679	Me3	malic enzyme 3, NADP(+)-dependent, mitochondrial	-0.879757	3.32997e-06	1.92576e-05	-0.309191	0.101247	0.429221
ENSMUSG00000030643.15	MGI:1923235	Rab30	RAB30, member RAS oncogene family	-1.19556	1.22425e-10	2.06103e-09	-0.461641	0.0124774	0.161037
ENSMUSG00000030653.18	MGI:5804952	Gm45837	predicted gene 45837	-1.27724	0.00010475	0.000428031	0.105953	0.747488	0.92145
ENSMUSG00000030683.12	MGI:2385295	Sez6l2	seizure related 6 homolog like 2	-1.09075	2.70154e-09	3.26032e-08	-0.18993	0.299886	0.672514
ENSMUSG00000030685.6	MGI:1923739	Kctd13	potassium channel tetramerisation domain containing 13	-0.754004	2.48663e-07	1.90374e-06	-0.13923	0.339955	0.705526
ENSMUSG00000030693.11	MGI:1916790	Klk10	kallikrein related-peptidase 10	-2.45494	2.95879e-05	0.000138099	-0.351232	0.517493	0.819949
ENSMUSG00000030729.18	MGI:1918224	Pgm2l1	phosphoglucomutase 2-like 1	-1.7139	1.95515e-10	3.14958e-09	-0.369571	0.169607	0.534832
ENSMUSG00000030731.14	MGI:99665	Syt3	synaptotagmin III	-1.0121	3.55299e-07	2.62312e-06	0.0416826	0.833096	0.950497
ENSMUSG00000030757.14	MGI:2444060	Zkscan2	zinc finger with KRAB and SCAN domains 2	-0.83778	0.000211122	0.000803147	0.115489	0.60757	0.866652
ENSMUSG00000030772.7	MGI:1354952	Dkk3	dickkopf WNT signaling pathway inhibitor 3	-0.809316	4.55433e-05	0.000203562	-0.218858	0.269971	0.646191
ENSMUSG00000030774.14	MGI:1339975	Pak1	p21 (RAC1) activated kinase 1	-1.1215	3.49783e-12	8.21518e-11	-0.0167015	0.917343	0.978281
ENSMUSG00000030811.15	MGI:3039600	Fbxl19	F-box and leucine-rich repeat protein 19	-0.655987	9.19344e-06	4.82145e-05	0.307731	0.0360768	0.272134
ENSMUSG00000030852.19	MGI:1928899	Tacc2	transforming, acidic coiled-coil containing protein 2	-0.737122	1.42364e-06	9.05984e-06	-0.123559	0.417785	0.757852
ENSMUSG00000030889.15	MGI:3041229	Vwa3a	von Willebrand factor A domain containing 3A	-2.39625	5.02987e-05	0.000222364	-1.19104	0.0427213	0.292883
ENSMUSG00000030897.6	MGI:2664099	Cnga4	cyclic nucleotide gated channel alpha 4	-1.28616	0.00142535	0.00446038	-0.305768	0.408573	0.75217
ENSMUSG00000030898.16	MGI:99479	Cckbr	cholecystokinin B receptor	-2.87935	4.44958e-11	8.25397e-10	-0.397655	0.332942	0.699445
ENSMUSG00000030905.6	MGI:102675	Crym	crystallin, mu	-1.4178	0.00012094	0.00048672	-0.000926887	0.997991	0.999733
ENSMUSG00000030967.16	MGI:106441	Zranb1	zinc finger, RAN-binding domain containing 1	-0.61187	7.75109e-06	4.13434e-05	-0.264973	0.0525832	0.32222
ENSMUSG00000031016.10	MGI:103075	Wee1	WEE 1 homolog 1 (S. pombe)	-0.798578	0.000525293	0.00182703	-0.354098	0.121721	0.462423
ENSMUSG00000031026.16	MGI:2152406	Trim66	tripartite motif-containing 66	-0.917046	0.00056466	0.00194934	0.0428298	0.870972	0.9638
ENSMUSG00000031028.15	MGI:2651573	Tub	tubby bipartite transcription factor	-1.47077	2.15165e-11	4.29897e-10	-0.371019	0.0908946	0.409518
ENSMUSG00000031105.17	MGI:1330823	Slc25a14	solute carrier family 25 (mitochondrial carrier, brain), member 14	-0.718843	6.81019e-07	4.69005e-06	-0.0932169	0.516355	0.819052
ENSMUSG00000031112.11	MGI:1917665	Stk26	serine/threonine kinase 26	-1.55857	1.69424e-08	1.68493e-07	-0.830282	0.0020858	0.059977
ENSMUSG00000031137.18	MGI:109178	Fgf13	fibroblast growth factor 13	-1.06925	1.89444e-05	9.25854e-05	-0.290867	0.244375	0.621987
ENSMUSG00000031139.17	MGI:96932	Mcf2	mcf.2 transforming sequence	-1.20641	0.000131534	0.00052568	0.260041	0.36052	0.720239
ENSMUSG00000031144.16	MGI:98467	Syp	synaptophysin	-0.968877	8.15332e-08	6.97737e-07	-0.0566342	0.75381	0.922232
ENSMUSG00000031166.14	MGI:1914661	Wdr13	WD repeat domain 13	-0.785759	2.11014e-07	1.64172e-06	-0.143075	0.34414	0.708969
ENSMUSG00000031169.14	MGI:1890212	Porcn	porcupine O-acyltransferase	-0.597445	4.34352e-05	0.000195301	-0.0250605	0.863424	0.960686
ENSMUSG00000031189.13	MGI:1202294	Aff2	AF4/FMR2 family, member 2	-1.25151	2.08971e-07	1.62891e-06	-0.444448	0.0602394	0.340368
ENSMUSG00000031202.6	MGI:1915040	Rab39b	RAB39B, member RAS oncogene family	-0.910977	1.63371e-08	1.63093e-07	-0.194562	0.225336	0.602188
ENSMUSG00000031224.7	MGI:2148316	Magee2	MAGE family member E2	-1.95645	3.18112e-10	4.88389e-09	-0.754727	0.012872	0.163771
ENSMUSG00000031227.9	MGI:2148149	Magee1	MAGE family member E1	-0.650982	8.75011e-06	4.61164e-05	0.000693717	0.996211	0.999189
ENSMUSG00000031242.8	MGI:1914278	2610002M06Rik	RIKEN cDNA 2610002M06 gene	-0.931061	4.9655e-10	7.24454e-09	-0.238354	0.109478	0.441806
ENSMUSG00000031292.15	MGI:1278336	Cdkl5	cyclin-dependent kinase-like 5	-0.724423	0.000530981	0.00184303	-0.220351	0.291774	0.66565
ENSMUSG00000031310.17	MGI:1927231	Zmym3	zinc finger, MYM-type 3	-0.602999	1.16164e-05	5.95642e-05	-0.0532242	0.698227	0.905189
ENSMUSG00000031323.9	MGI:1918137	Dmrtc1a	DMRT-like family C1a	-0.701252	0.000248298	0.000929332	-0.020628	0.912631	0.977123
ENSMUSG00000031327.11	MGI:1344694	Chic1	cysteine-rich hydrophobic domain 1	-0.729783	3.894e-05	0.000177241	-0.135974	0.441756	0.774544
ENSMUSG00000031333.8	MGI:109533	Abcb7	ATP-binding cassette, sub-family B (MDR/TAP), member 7	-0.647018	9.00936e-11	1.55774e-09	-0.353645	0.000376158	0.0206168
ENSMUSG00000031343.14	MGI:95615	Gabra3	gamma-aminobutyric acid (GABA) A receptor, subunit alpha 3	-1.73167	1.02193e-05	5.30721e-05	0.65749	0.0906351	0.409491
ENSMUSG00000031364.3	MGI:95836	Grpr	gastrin releasing peptide receptor	-1.60558	0.00247098	0.00725655	0.261204	0.552361	0.837261
ENSMUSG00000031376.16	MGI:1347353	Atp2b3	ATPase, Ca++ transporting, plasma membrane 3	-1.39296	1.39367e-09	1.80781e-08	-0.338615	0.140268	0.492191
ENSMUSG00000031391.19	MGI:96721	L1cam	L1 cell adhesion molecule	-1.49437	4.77668e-07	3.41321e-06	0.244339	0.40878	0.752359
ENSMUSG00000031393.17	MGI:99918	Mecp2	methyl CpG binding protein 2	-0.702618	1.22141e-07	1.00691e-06	-0.170241	0.199247	0.572662
ENSMUSG00000031409.2	MGI:1923939	Tceal6	transcription elongation factor A (SII)-like 6	-0.632261	4.45546e-05	0.000199577	-0.160963	0.29722	0.670486
ENSMUSG00000031428.12	MGI:1914245	Zcchc18	zinc finger, CCHC domain containing 18	-0.937748	8.79716e-12	1.89732e-10	-0.0526912	0.700745	0.905863
ENSMUSG00000031432.4	MGI:97775	Prps1	phosphoribosyl pyrophosphate synthetase 1	-0.917159	1.57681e-11	3.23352e-10	-0.172302	0.202118	0.574869
ENSMUSG00000031442.22	MGI:103263	Mcf2l	mcf.2 transforming sequence-like	-0.715262	0.00155621	0.00481852	-0.0527128	0.81551	0.944768
ENSMUSG00000031517.9	MGI:107671	Gpm6a	glycoprotein m6a	-0.793307	2.55192e-07	1.94752e-06	-0.191454	0.213486	0.589583
ENSMUSG00000031539.7	MGI:1929214	Ap3m2	adaptor-related protein complex 3, mu 2 subunit	-0.762004	1.15112e-10	1.95161e-09	-0.119041	0.312254	0.682257
ENSMUSG00000031543.19	MGI:88024	Ank1	ankyrin 1, erythroid	-1.29496	3.83731e-10	5.7833e-09	0.392047	0.0545646	0.326064
ENSMUSG00000031549.17	MGI:2142489	Ido2	indoleamine 2,3-dioxygenase 2	-1.89147	2.36941e-06	1.42199e-05	-0.3922	0.272832	0.648642
ENSMUSG00000031558.16	MGI:1315205	Slit2	slit guidance ligand 2	-1.42385	0.00047036	0.00165336	0.141089	0.727737	0.914975
ENSMUSG00000031605.9	MGI:1924363	Klhl2	kelch-like 2, Mayven	-0.762694	0.000338045	0.00122833	-0.0921167	0.664982	0.892714
ENSMUSG00000031618.14	MGI:99459	Nr3c2	nuclear receptor subfamily 3, group C, member 2	-1.10211	0.000185233	0.000713581	-0.394758	0.180446	0.550691
ENSMUSG00000031642.10	MGI:1913066	Sh3rf1	SH3 domain containing ring finger 1	-0.896339	4.43353e-05	0.000198749	0.0717633	0.742866	0.919668
ENSMUSG00000031654.17	MGI:88281	Cbln1	cerebellin 1 precursor protein	-2.00313	3.76473e-09	4.39947e-08	0.352041	0.207728	0.581888
ENSMUSG00000031673.7	MGI:99217	Cdh11	cadherin 11	-0.798776	2.27043e-09	2.79276e-08	-0.0239252	0.857323	0.958805
ENSMUSG00000031728.11	MGI:1923121	Zfp821	zinc finger protein 821	-0.589676	4.36999e-05	0.000196298	-0.0154128	0.914506	0.977823
ENSMUSG00000031732.13	MGI:2444928	Phlpp2	PH domain and leucine rich repeat protein phosphatase 2	-0.731432	2.54632e-06	1.51713e-05	-0.212657	0.169811	0.535043
ENSMUSG00000031750.16	MGI:1923777	Il34	interleukin 34	-1.82674	3.21279e-09	3.82122e-08	-0.245038	0.423057	0.761619
ENSMUSG00000031772.18	MGI:2183572	Cntnap4	contactin associated protein-like 4	-2.53114	6.14985e-13	1.71563e-11	0.375434	0.268789	0.644814
ENSMUSG00000031833.11	MGI:2683541	Mast3	microtubule associated serine/threonine kinase 3	-0.73577	2.25755e-06	1.36396e-05	-0.323706	0.0374415	0.276886
ENSMUSG00000031837.15	MGI:2152211	Necab2	N-terminal EF-hand calcium binding protein 2	-1.02956	0.00129682	0.00410085	0.257044	0.421028	0.760531
ENSMUSG00000031840.15	MGI:97843	Rab3a	RAB3A, member RAS oncogene family	-0.712361	9.00024e-06	4.73307e-05	-0.073396	0.647166	0.884242
ENSMUSG00000031872.15	MGI:1929597	Bean1	brain expressed, associated with Nedd4, 1	-0.659444	0.00331124	0.00941753	-0.264816	0.228023	0.605235
ENSMUSG00000031883.14	MGI:103100	Car7	carbonic anhydrase 7	-1.00914	0.000142581	0.000565197	0.191242	0.468556	0.791896
ENSMUSG00000031906.10	MGI:1927578	Smpd3	sphingomyelin phosphodiesterase 3, neutral	-1.69206	5.05975e-12	1.14716e-10	-0.262986	0.282016	0.65682
ENSMUSG00000031910.15	MGI:109599	Has3	hyaluronan synthase 3	-1.64933	6.72452e-06	3.63394e-05	-0.381297	0.28601	0.660942
ENSMUSG00000031937.8	MGI:1916387	Vstm5	V-set and transmembrane domain containing 5	-1.18936	7.96775e-08	6.84503e-07	0.173209	0.413407	0.754614
ENSMUSG00000031970.18	MGI:1919435	Dbndd1	dysbindin (dystrobrevin binding protein 1) domain containing 1	-1.98554	9.02388e-11	1.55932e-09	0.0426454	0.882575	0.967051
ENSMUSG00000032011.6	MGI:98747	Thy1	thymus cell antigen 1, theta	-0.783039	9.62436e-07	6.39202e-06	-0.0732652	0.64651	0.883813
ENSMUSG00000032017.15	MGI:95817	Grik4	glutamate receptor, ionotropic, kainate 4	-1.05123	0.000607056	0.00208122	0.254212	0.405758	0.749312
ENSMUSG00000032024.11	MGI:1918816	Clmp	CXADR-like membrane protein	-1.06428	0.000227144	0.000858197	-0.202341	0.482912	0.8018
ENSMUSG00000032064.18	MGI:2679721	Dixdc1	DIX domain containing 1	-0.78973	1.41119e-05	7.10684e-05	-0.25381	0.162473	0.52505
ENSMUSG00000032087.12	MGI:2150309	Dscaml1	DS cell adhesion molecule like 1	-1.36652	2.17435e-09	2.6849e-08	-0.325777	0.152829	0.511816
ENSMUSG00000032101.7	MGI:1353582	Ddx25	DEAD box helicase 25	-0.777052	9.77592e-08	8.20871e-07	0.129285	0.369503	0.725244
ENSMUSG00000032105.6	MGI:2429554	Pdzd3	PDZ domain containing 3	-1.2704	9.75074e-05	0.000402263	-0.946423	0.00231999	0.0629107
ENSMUSG00000032131.17	MGI:1890594	Abcg4	ATP binding cassette subfamily G member 4	-0.959171	4.49655e-10	6.65142e-09	0.105443	0.489884	0.804329
ENSMUSG00000032174.6	MGI:109430	Icam5	intercellular adhesion molecule 5, telencephalin	-0.996245	0.00202641	0.00609788	0.143988	0.655424	0.888068
ENSMUSG00000032192.10	MGI:101848	Gnb5	guanine nucleotide binding protein (G protein), beta 5	-0.646141	7.14467e-09	7.76869e-08	-0.0996392	0.370491	0.725693
ENSMUSG00000032259.9	MGI:94924	Drd2	dopamine receptor D2	-2.62146	3.72428e-08	3.43654e-07	0.460774	0.266525	0.643156
ENSMUSG00000032262.14	MGI:1933331	Elovl4	elongation of very long chain fatty acids (FEN1/Elo2, SUR4/Elo3, yeast)-like 4	-0.653314	0.00128627	0.00407077	-0.0977093	0.629129	0.876297
ENSMUSG00000032269.9	MGI:96282	Htr3a	5-hydroxytryptamine (serotonin) receptor 3A	-2.04406	0.000779735	0.00260454	0.30135	0.614945	0.870137
ENSMUSG00000032289.16	MGI:2672033	Thsd4	thrombospondin, type I, domain containing 4	-1.49842	4.23159e-05	0.000190796	0.0249343	0.945495	0.986672
ENSMUSG00000032291.9	MGI:88490	Crabp1	cellular retinoic acid binding protein I	-3.02653	0.000104398	0.000426713	-1.05866	0.0959585	0.420796
ENSMUSG00000032307.17	MGI:2388672	Ube2q2	ubiquitin-conjugating enzyme E2Q family member 2	-0.794825	3.14856e-14	1.17458e-12	-0.242773	0.0192317	0.201767
ENSMUSG00000032328.13	MGI:106402	Tmem30a	transmembrane protein 30A	-0.788462	4.75993e-10	6.96581e-09	-0.333275	0.00843793	0.130478
ENSMUSG00000032329.5	MGI:1914117	Hmg20a	high mobility group 20A	-0.657538	6.67942e-09	7.33487e-08	-0.0815099	0.470821	0.793299
ENSMUSG00000032333.7	MGI:1916356	Stoml1	stomatin-like 1	-0.677457	9.13555e-09	9.69885e-08	-0.102641	0.38058	0.731734
ENSMUSG00000032336.18	MGI:108077	Nptn	neuroplastin	-0.775161	9.22654e-10	1.25156e-08	-0.230812	0.0681734	0.360938
ENSMUSG00000032356.13	MGI:99694	Rasgrf1	RAS protein-specific guanine nucleotide-releasing factor 1	-1.45866	2.17545e-08	2.11095e-07	-0.469983	0.0712063	0.36934
ENSMUSG00000032375.16	MGI:3522097	Aph1b	aph1 homolog B, gamma secretase subunit	-0.650189	2.90776e-07	2.19405e-06	-0.148441	0.238557	0.616393
ENSMUSG00000032403.9	MGI:1916728	2300009A05Rik	RIKEN cDNA 2300009A05 gene	-0.624337	0.000168366	0.000654602	-0.252716	0.124808	0.467109
ENSMUSG00000032417.11	MGI:1916769	Rwdd2a	RWD domain containing 2A	-1.27059	4.12749e-06	2.34086e-05	0.0552454	0.838124	0.952417
ENSMUSG00000032452.13	MGI:1929897	Clstn2	calsyntenin 2	-0.938372	3.15524e-06	1.83319e-05	-0.207066	0.303288	0.675161
ENSMUSG00000032507.16	MGI:1919429	Fbxl2	F-box and leucine-rich repeat protein 2	-0.922462	2.24152e-08	2.16775e-07	-0.0566081	0.729121	0.915634
ENSMUSG00000032528.6	MGI:109272	Vipr1	vasoactive intestinal peptide receptor 1	-0.590357	0.000133669	0.000533321	-0.261932	0.0883461	0.404936
ENSMUSG00000032532.8	MGI:88297	Cck	cholecystokinin	-2.12387	2.15795e-30	6.20865e-26	-0.28516	0.121538	0.461982
ENSMUSG00000032549.8	MGI:107283	Rab6b	RAB6B, member RAS oncogene family	-1.11137	1.54274e-11	3.17952e-10	-0.174113	0.29048	0.664715
ENSMUSG00000032564.17	MGI:1921270	Cpne4	copine IV	-3.2368	2.21104e-08	2.14188e-07	-0.598097	0.300417	0.673173
ENSMUSG00000032586.10	MGI:1096377	Traip	TRAF-interacting protein	-1.20493	4.41193e-05	0.000197904	-0.0204505	0.944443	0.986454
ENSMUSG00000032589.15	MGI:1277955	Bsn	bassoon	-0.981006	6.01166e-05	0.000260838	0.0482654	0.84345	0.954709
ENSMUSG00000032606.8	MGI:1913507	Nicn1	nicolin 1	-0.828084	7.38057e-10	1.03181e-08	0.0275099	0.837145	0.952266
ENSMUSG00000032625.15	MGI:2685683	Thsd7a	thrombospondin, type I, domain containing 7A	-1.35589	1.05949e-07	8.84067e-07	-0.439973	0.08378	0.396779
ENSMUSG00000032652.14	MGI:1889385	Crebl2	cAMP responsive element binding protein-like 2	-0.834041	4.85451e-08	4.36739e-07	-0.201998	0.182987	0.553435
ENSMUSG00000032657.16	MGI:1915771	Fam189b	family with sequence similarity 189, member B	-0.605894	0.000148498	0.000585908	0.128205	0.41997	0.759795
ENSMUSG00000032705.10	MGI:1922485	Exd2	exonuclease 3'-5' domain containing 2	-0.967465	4.19301e-07	3.03872e-06	-0.247554	0.194426	0.566684
ENSMUSG00000032773.10	MGI:88396	Chrm1	cholinergic receptor, muscarinic 1, CNS	-0.920774	4.96946e-06	2.76657e-05	-0.292958	0.14609	0.499879
ENSMUSG00000032776.10	MGI:2685335	Mctp2	multiple C2 domains, transmembrane 2	-1.24148	0.000736617	0.00247729	0.244075	0.473345	0.795311
ENSMUSG00000032807.6	MGI:1274782	Alox12b	arachidonate 12-lipoxygenase, 12R type	-3.76782	1.77362e-06	1.10404e-05	-0.471333	0.519522	0.820773
ENSMUSG00000032827.16	MGI:2442401	Ppp1r9a	protein phosphatase 1, regulatory subunit 9A	-0.76551	3.07081e-05	0.000142707	-0.260171	0.156436	0.517107
ENSMUSG00000032839.14	MGI:109528	Trpc1	transient receptor potential cation channel, subfamily C, member 1	-0.969741	2.49197e-10	3.90292e-09	-0.368422	0.0155852	0.181942
ENSMUSG00000032875.9	MGI:2673002	Arhgef17	Rho guanine nucleotide exchange factor (GEF) 17	-0.704867	8.56318e-07	5.75768e-06	-0.155145	0.278426	0.653917
ENSMUSG00000032878.17	MGI:2445069	Ccdc85a	coiled-coil domain containing 85A	-1.52785	3.08295e-06	1.7959e-05	-0.60734	0.0634043	0.349087
ENSMUSG00000032890.18	MGI:2443331	Rims3	regulating synaptic membrane exocytosis 3	-1.53918	1.70332e-07	1.3594e-06	0.188311	0.518834	0.820558
ENSMUSG00000032898.10	MGI:1924223	Fbxo21	F-box protein 21	-0.77353	1.26074e-08	1.29298e-07	-0.0831716	0.539548	0.83112
ENSMUSG00000032936.14	MGI:2384296	Camkv	CaM kinase-like vesicle-associated	-1.62404	3.21074e-08	2.99826e-07	-0.151365	0.60615	0.866238
ENSMUSG00000032966.15	MGI:95541	Fkbp1a	FK506 binding protein 1a	-0.620207	3.1054e-06	1.80788e-05	0.0236964	0.858499	0.959177
ENSMUSG00000032985.16	MGI:1917876	5730522E02Rik	RIKEN cDNA 5730522E02 gene	-1.51016	1.13181e-05	5.82112e-05	-0.0803003	0.805878	0.941634
ENSMUSG00000033004.17	MGI:2179432	Mycbp2	MYC binding protein 2, E3 ubiquitin protein ligase	-0.858577	0.000306587	0.00112429	0.0315678	0.894391	0.971651
ENSMUSG00000033009.16	MGI:2442978	Ogfod1	2-oxoglutarate and iron-dependent oxygenase domain containing 1	-0.884686	6.08662e-11	1.09999e-09	-0.154025	0.253386	0.631123
ENSMUSG00000033060.17	MGI:1353586	Lmo7	LIM domain only 7	-1.01892	5.0979e-05	0.000224887	-0.109963	0.661713	0.89156
ENSMUSG00000033063.9	MGI:3588199	Cntnap3	contactin associated protein-like 3	-2.35923	1.30555e-06	8.39751e-06	0.917758	0.0397044	0.283253
ENSMUSG00000033066.18	MGI:1202388	Gas7	growth arrest specific 7	-0.848018	1.61109e-05	8.00738e-05	-0.0915777	0.640965	0.881617
ENSMUSG00000033068.17	MGI:1202295	Entpd6	ectonucleoside triphosphate diphosphohydrolase 6	-0.659497	1.81211e-08	1.79101e-07	-0.0855579	0.462096	0.787358
ENSMUSG00000033186.10	MGI:1924039	Mzt1	mitotic spindle organizing protein 1	-0.88181	6.75581e-11	1.20953e-09	-0.36073	0.00738818	0.119829
ENSMUSG00000033214.11	MGI:2679448	Slitrk5	SLIT and NTRK-like family, member 5	-1.08275	4.01312e-11	7.55143e-10	-0.318114	0.0515247	0.318855
ENSMUSG00000033249.11	MGI:1347058	Hsf4	heat shock transcription factor 4	-1.0929	2.56978e-05	0.000121671	0.0689607	0.781945	0.932907
ENSMUSG00000033256.15	MGI:3613669	Shf	Src homology 2 domain containing F	-0.997964	2.87671e-07	2.17233e-06	0.0482453	0.801821	0.940508
ENSMUSG00000033282.15	MGI:1920563	Rpgrip1l	Rpgrip1-like	-0.675802	1.12793e-08	1.17154e-07	-0.0266117	0.819039	0.945613
ENSMUSG00000033316.15	MGI:2677965	Galnt9	polypeptide N-acetylgalactosaminyltransferase 9	-1.49426	8.8597e-05	0.00036921	0.230647	0.544181	0.833525
ENSMUSG00000033327.19	MGI:1932137	Tnxb	tenascin XB	-1.24817	2.66616e-07	2.0261e-06	-0.844195	0.000481837	0.0242834
ENSMUSG00000033342.16	MGI:1923019	Plppr5	phospholipid phosphatase related 5	-0.919598	5.75165e-09	6.44395e-08	-0.483239	0.00216258	0.060636
ENSMUSG00000033352.12	MGI:1346869	Map2k4	mitogen-activated protein kinase kinase 4	-0.983775	1.4456e-08	1.46448e-07	-0.103878	0.54889	0.835575
ENSMUSG00000033377.15	MGI:2148896	Palmd	palmdelphin	-1.00343	6.79459e-09	7.44713e-08	-0.37705	0.0268379	0.236483
ENSMUSG00000033389.17	MGI:2144423	Arhgap44	Rho GTPase activating protein 44	-1.0081	1.02942e-06	6.79613e-06	-0.0635911	0.757639	0.923823
ENSMUSG00000033419.17	MGI:109132	Snap91	synaptosomal-associated protein 91	-1.01057	1.85434e-06	1.14858e-05	0.0207843	0.92181	0.97972
ENSMUSG00000033460.15	MGI:1925498	Armcx1	armadillo repeat containing, X-linked 1	-0.886608	4.06489e-11	7.61716e-10	-0.0471858	0.722829	0.9144
ENSMUSG00000033491.14	MGI:2444800	Prss35	protease, serine 35	-1.53078	8.14273e-05	0.000342858	-0.366438	0.337578	0.70323
ENSMUSG00000033565.19	MGI:1933973	Rbfox2	RNA binding protein, fox-1 homolog (C. elegans) 2	-0.986396	1.69911e-09	2.15448e-08	0.000758896	0.996296	0.999189
ENSMUSG00000033569.18	MGI:2441837	Adgrb3	adhesion G protein-coupled receptor B3	-0.92977	3.2381e-06	1.877e-05	-0.286438	0.150936	0.508132
ENSMUSG00000033585.6	MGI:97290	Ndn	necdin, MAGE family member	-0.624168	0.000200574	0.000766466	0.00187653	0.991056	0.99796
ENSMUSG00000033595.8	MGI:2182619	Lgi3	leucine-rich repeat LGI family, member 3	-0.625304	0.000381086	0.00136728	-0.0132161	0.940098	0.985011
ENSMUSG00000033597.10	MGI:2442952	Caskin1	CASK interacting protein 1	-0.812519	1.1074e-07	9.20042e-07	0.225131	0.140395	0.492526
ENSMUSG00000033615.10	MGI:104727	Cplx1	complexin 1	-1.12274	5.88142e-08	5.20019e-07	0.20975	0.310543	0.681232
ENSMUSG00000033676.14	MGI:95621	Gabrb3	gamma-aminobutyric acid (GABA) A receptor, subunit beta 3	-0.926143	1.95147e-06	1.1997e-05	-0.372317	0.0556826	0.328918
ENSMUSG00000033697.17	MGI:107858	Arhgap39	Rho GTPase activating protein 39	-0.719062	2.4827e-06	1.48256e-05	-0.223068	0.143687	0.496645
ENSMUSG00000033740.18	MGI:2446700	St18	suppression of tumorigenicity 18	-0.617747	0.00282602	0.00818723	-0.174504	0.39789	0.743729
ENSMUSG00000033769.17	MGI:1923164	Exoc6b	exocyst complex component 6B	-0.959364	7.04066e-11	1.25584e-09	-0.134693	0.359033	0.719425
ENSMUSG00000033805.13	MGI:2686228	Ephx4	epoxide hydrolase 4	-0.76839	2.30603e-05	0.000110596	-0.067924	0.706456	0.908081
ENSMUSG00000033849.4	MGI:1349461	B3galt2	UDP-Gal:betaGlcNAc beta 1,3-galactosyltransferase, polypeptide 2	-1.137	1.29492e-06	8.33283e-06	-0.319962	0.171061	0.536525
ENSMUSG00000033854.11	MGI:1919508	Kcnk10	potassium channel, subfamily K, member 10	-0.699237	0.000321988	0.00117547	-0.365767	0.0578295	0.333892
ENSMUSG00000033863.3	MGI:1333856	Klf9	Kruppel-like factor 9	-0.695011	0.000729954	0.00245747	-0.422262	0.0401339	0.284338
ENSMUSG00000033900.14	MGI:2442208	Map9	microtubule-associated protein 9	-0.750438	6.80843e-08	5.94312e-07	-0.209227	0.131576	0.478385
ENSMUSG00000033910.14	MGI:1926562	Gucy1a1	guanylate cyclase 1, soluble, alpha 1	-1.07119	1.97815e-06	1.21324e-05	-0.105252	0.637931	0.880239
ENSMUSG00000033948.4	MGI:1921714	Zswim5	zinc finger SWIM-type containing 5	-0.780346	1.38625e-07	1.12829e-06	-0.275086	0.0597813	0.339009
ENSMUSG00000033953.11	MGI:107172	Ppp3r1	protein phosphatase 3, regulatory subunit B, alpha isoform (calcineurin B, type I)	-1.445	4.62916e-09	5.31679e-08	-0.352494	0.152788	0.511761
ENSMUSG00000033966.9	MGI:3587025	Cdkl4	cyclin-dependent kinase-like 4	-1.68992	2.45361e-06	1.46732e-05	0.0554786	0.874308	0.96461
ENSMUSG00000033981.15	MGI:95809	Gria2	glutamate receptor, ionotropic, AMPA2 (alpha 2)	-1.07185	1.68044e-10	2.75282e-09	-0.469811	0.0050994	0.0979266
ENSMUSG00000034021.16	MGI:2140945	Pds5b	PDS5 cohesin associated factor B	-1.12908	7.23869e-13	1.98158e-11	-0.347341	0.0269202	0.237106
ENSMUSG00000034040.18	MGI:2137594	Galnt17	polypeptide N-acetylgalactosaminyltransferase 17	-1.02207	3.70604e-06	2.11897e-05	-0.215441	0.329045	0.696551
ENSMUSG00000034057.9	MGI:2685085	Myrfl	myelin regulatory factor-like	-1.78252	0.000581454	0.00200084	-0.508098	0.282857	0.657375
ENSMUSG00000034059.15	MGI:3605071	Ypel4	yippee like 4	-1.14707	0.000663626	0.00225634	0.0217012	0.94858	0.987139
ENSMUSG00000034071.16	MGI:3588205	Zfp551	zinc fingr protein 551	-0.842509	1.20669e-06	7.81225e-06	0.0869553	0.610621	0.868061
ENSMUSG00000034098.15	MGI:2442179	Fstl5	follistatin-like 5	-1.60338	3.23478e-06	1.87599e-05	-0.240226	0.482667	0.801587
ENSMUSG00000034111.7	MGI:1923480	Tmed8	transmembrane p24 trafficking protein 8	-0.645124	4.04931e-11	7.59966e-10	-0.114311	0.237962	0.615973
ENSMUSG00000034145.15	MGI:2444386	Tmem63c	transmembrane protein 63c	-0.943727	3.77113e-06	2.15148e-05	-0.0758431	0.708662	0.908436
ENSMUSG00000034160.14	MGI:1339639	Ogt	O-linked N-acetylglucosamine (GlcNAc) transferase (UDP-N-acetylglucosamine:polypeptide-N-acetylglucosaminyl transferase)	-0.7018	1.48279e-05	7.43619e-05	-0.00260005	0.987189	0.997292
ENSMUSG00000034171.14	MGI:109609	Faah	fatty acid amide hydrolase	-1.25861	4.04304e-06	2.29659e-05	-0.240126	0.378855	0.731206
ENSMUSG00000034187.19	MGI:104560	Nsf	N-ethylmaleimide sensitive fusion protein	-1.09697	5.28949e-07	3.73146e-06	-0.275878	0.2071	0.581271
ENSMUSG00000034220.8	MGI:1194891	Gpc1	glypican 1	-0.820625	0.00186081	0.00565157	0.123045	0.640596	0.881551
ENSMUSG00000034245.11	MGI:2385252	Hdac11	histone deacetylase 11	-0.994788	2.09681e-10	3.35152e-09	0.0900292	0.56406	0.844397
ENSMUSG00000034285.16	MGI:1278344	Nipsnap1	nipsnap homolog 1	-0.604882	6.98516e-06	3.76208e-05	-0.0139463	0.917039	0.978281
ENSMUSG00000034336.4	MGI:96568	Ina	internexin neuronal intermediate filament protein, alpha	-1.09172	1.31625e-08	1.34338e-07	0.0290361	0.879622	0.965932
ENSMUSG00000034402.4	MGI:3584508	Kcnh5	potassium voltage-gated channel, subfamily H (eag-related), member 5	-2.18498	2.12123e-13	6.59781e-12	-0.896148	0.00168209	0.0522662
ENSMUSG00000034403.17	MGI:1101765	Pja1	praja ring finger ubiquitin ligase 1	-0.82654	6.701e-10	9.47393e-09	-0.148542	0.266117	0.642806
ENSMUSG00000034413.15	MGI:3643092	Neurl1b	neuralized E3 ubiquitin protein ligase 1B	-0.922585	1.10107e-10	1.87339e-09	-0.278766	0.049228	0.311546
ENSMUSG00000034472.14	MGI:1922391	Rasd2	RASD family, member 2	-2.19618	1.1231e-12	2.93752e-11	-0.72875	0.0176985	0.193802
ENSMUSG00000034551.13	MGI:2685226	Hdx	highly divergent homeobox	-0.794811	9.24859e-07	6.16607e-06	0.000719404	0.996381	0.999189
[truncated: 1,700 more rows]

## Sheet: EZ_7<1.5FC
gene	MGI_ID	GeneSymbol	Description	EZ_7_log2FoldChange	EZ_7_pvalue	EZ_7_padj	PIZ_7_log2FoldChange	PIZ_7_pvalue	PIZ_7_padj
[truncated: 3,017 more rows]

[truncated: 10 more sheets: PIZ_7Up, PIZ_7Up_v_EZ_7Up, PIZ_7Up_v_EZ_7<1.5FC, PIZ_7DN, PIZ_7DN_v_EZ_7DN, PIZ_7DN_v_EZ_7<1.5FC, PIZ_7<1.5FC, PIZ_7<1.5FC_v_EZ_7Up, PIZ_7<1.5FC_v_EZ_7DN, PIZ_7<1.5FC_v_EZ_7<1.5FC]
