# Supplementary material for: Transcriptome Profiling of the Hippocampal Seizure Network Implicates a Role for Wnt Signaling during Epileptogenesis in a Mouse Model of Temporal Lobe Epilepsy
Source: Int J Mol Sci. 2022 Oct 10;23(19):12030. doi: 10.3390/ijms231912030 (PMC9569502; doi:10.3390/ijms231912030)
Supplement: Supplementary file 1 [file ijms-23-12030-s001.zip › Supplementary Table S5.xlsx]

## Sheet: EZ_14Up
gene	MGI_ID	GeneSymbol	Description	EZ_14_log2FoldChange	EZ_14_pvalue	EZ_14_padj	PIZ_14_log2FoldChange	PIZ_14_pvalue	PIZ_14_padj
ENSMUSG00000000244.18	MGI:1350360	Tspan32	tetraspanin 32	2.6627	2.25021e-05	0.00123434	-0.0945867	0.900219	0.998747
ENSMUSG00000000275.17	MGI:102749	Trim25	tripartite motif-containing 25	1.31603	1.12514e-05	0.000741583	0.143667	0.633936	0.998274
ENSMUSG00000000290.14	MGI:96611	Itgb2	integrin beta 2	2.07678	9.00066e-07	0.000115198	0.36779	0.39025	0.993554
ENSMUSG00000000386.17	MGI:97243	Mx1	MX dynamin-like GTPase 1	5.2001	2.73714e-11	4.35612e-08	0.76756	0.361166	0.987205
ENSMUSG00000000555.9	MGI:96604	Itga5	integrin alpha 5 (fibronectin receptor alpha)	2.15365	1.17624e-05	0.000764256	0.133725	0.789941	0.998747
ENSMUSG00000000562.6	MGI:104847	Adora3	adenosine A3 receptor	1.48687	0.00020252	0.00657564	0.705463	0.106586	0.862834
ENSMUSG00000000628.11	MGI:1315197	Hk2	hexokinase 2	1.5569	6.5728e-07	9.04335e-05	0.206277	0.511438	0.998258
ENSMUSG00000000682.8	MGI:1346088	Cd52	CD52 antigen	3.52846	2.88175e-12	1.05731e-08	0.749204	0.158651	0.90298
ENSMUSG00000000693.11	MGI:1337004	Loxl3	lysyl oxidase-like 3	1.80838	7.82203e-06	0.000577833	0.075566	0.853954	0.998747
ENSMUSG00000000753.16	MGI:108080	Serpinf1	serine (or cysteine) peptidase inhibitor, clade F, member 1	2.65308	6.40164e-08	1.58343e-05	0.6097	0.215475	0.937925
ENSMUSG00000000958.11	MGI:1337120	Slc7a7	solute carrier family 7 (cationic amino acid transporter, y+ system), member 7	2.09801	1.05807e-06	0.000126473	-0.0117661	0.979006	0.998747
ENSMUSG00000000982.6	MGI:98260	Ccl3	chemokine (C-C motif) ligand 3	3.78275	2.75387e-09	1.55446e-06	-0.51037	0.520249	0.998258
ENSMUSG00000000983.14	MGI:107506	Wfdc18	WAP four-disulfide core domain 18	3.46867	5.29058e-06	0.000420458	0.119295	0.881819	0.998747
ENSMUSG00000001020.9	MGI:1330282	S100a4	S100 calcium binding protein A4	2.72927	1.24179e-06	0.000142466	0.370559	0.523889	0.998258
ENSMUSG00000001025.9	MGI:1339467	S100a6	S100 calcium binding protein A6 (calcyclin)	1.9985	1.31206e-07	2.60213e-05	0.762924	0.045696	0.711388
ENSMUSG00000001119.8	MGI:88459	Col6a1	collagen, type VI, alpha 1	2.62445	6.26984e-06	0.000480921	1.73149	0.00279497	0.250507
ENSMUSG00000001123.16	MGI:109496	Lgals9	lectin, galactose binding, soluble 9	1.88871	3.0218e-07	4.86156e-05	0.395765	0.287398	0.961307
ENSMUSG00000001131.12	MGI:98752	Timp1	tissue inhibitor of metalloproteinase 1	4.63589	1.61005e-07	3.02937e-05	2.04975	0.0527298	0.737957
ENSMUSG00000001473.8	MGI:1915201	Tubb6	tubulin, beta 6 class V	2.16772	4.06894e-05	0.00190582	0.701736	0.205512	0.935159
ENSMUSG00000001750.17	MGI:1350931	Tcirg1	T cell, immune regulator 1, ATPase, H+ transporting, lysosomal V0 protein A3	1.33288	5.04458e-05	0.00222728	0.495171	0.135169	0.881442
ENSMUSG00000002111.9	MGI:98282	Spi1	spleen focus forming virus (SFFV) proviral integration oncogene	1.66116	3.1961e-05	0.00158824	0.468779	0.256277	0.955211
ENSMUSG00000002325.16	MGI:107587	Irf9	interferon regulatory factor 9	0.995917	6.46252e-05	0.00268934	0.146767	0.560237	0.998258
ENSMUSG00000002332.17	MGI:1196314	Dhrs1	dehydrogenase/reductase (SDR family) member 1	1.43193	3.82107e-06	0.000329871	0.160968	0.604018	0.998274
ENSMUSG00000002603.16	MGI:98725	Tgfb1	transforming growth factor, beta 1	1.38356	0.000190543	0.00629821	0.324777	0.392477	0.993554
ENSMUSG00000002668.9	MGI:1918035	Dennd1c	DENN/MADD domain containing 1C	1.50099	9.9034e-05	0.00373311	0.708352	0.0725139	0.797126
ENSMUSG00000002699.14	MGI:1321402	Lcp2	lymphocyte cytosolic protein 2	1.87577	6.88968e-06	0.000517643	0.188927	0.656006	0.998274
ENSMUSG00000002983.18	MGI:103289	Relb	avian reticuloendotheliosis viral (v-rel) oncogene related B	1.09601	5.42066e-05	0.00235366	-0.00497813	0.985562	0.998747
ENSMUSG00000003283.16	MGI:96052	Hck	hemopoietic cell kinase	1.67139	4.67011e-05	0.00210241	0.465973	0.271854	0.957879
ENSMUSG00000003484.5	MGI:1919304	Cyp4f18	cytochrome P450, family 4, subfamily f, polypeptide 18	5.34601	2.91729e-05	0.0014866	0.568157	0.704209	0.998747
ENSMUSG00000003534.18	MGI:99216	Ddr1	discoidin domain receptor family, member 1	0.83345	9.81252e-06	0.000692348	0.491401	0.00928472	0.416085
ENSMUSG00000003812.14	MGI:1329019	Dnase2a	deoxyribonuclease II alpha	1.42982	1.92023e-05	0.00110276	0.0383904	0.9099	0.998747
ENSMUSG00000004266.16	MGI:96055	Ptpn6	protein tyrosine phosphatase, non-receptor type 6	2.32651	1.44846e-08	5.40446e-06	0.198112	0.634742	0.998274
ENSMUSG00000004552.17	MGI:107361	Ctse	cathepsin E	5.16835	2.36873e-05	0.00128059	-0.0222324	0.989473	0.999286
ENSMUSG00000004609.12	MGI:99440	Cd33	CD33 antigen	1.24187	3.46999e-05	0.00167887	0.268052	0.375236	0.991229
ENSMUSG00000004707.15	MGI:96885	Ly9	lymphocyte antigen 9	3.69296	1.90714e-08	6.16636e-06	2.06646	0.00583413	0.355711
ENSMUSG00000004709.15	MGI:109294	Cd244a	CD244 molecule A	4.53977	5.78503e-05	0.00247972	0.89646	0.492765	0.998258
ENSMUSG00000004730.16	MGI:106912	Adgre1	adhesion G protein-coupled receptor E1	1.86835	1.77017e-05	0.00104044	0.0809392	0.853977	0.998747
ENSMUSG00000004952.14	MGI:1858600	Rasa4	RAS p21 protein activator 4	1.92745	7.26891e-07	9.81704e-05	0.101703	0.796964	0.998747
ENSMUSG00000005087.18	MGI:88338	Cd44	CD44 antigen	3.8906	2.59395e-10	3.1724e-07	-0.04693	0.9396	0.998747
ENSMUSG00000005142.11	MGI:107286	Man2b1	mannosidase 2, alpha B1	1.02448	0.000196562	0.00643916	0.0177949	0.948523	0.998747
ENSMUSG00000005373.14	MGI:1927999	Mlxipl	MLX interacting protein-like	1.18481	0.000327147	0.00971905	0.159327	0.638392	0.998274
ENSMUSG00000005413.9	MGI:96163	Hmox1	heme oxygenase 1	1.51945	9.0306e-06	0.000647556	0.734321	0.0333716	0.670111
ENSMUSG00000005892.5	MGI:98823	Trh	thyrotropin releasing hormone	5.29178	2.1961e-07	3.89879e-05	1.03197	0.34665	0.980899
ENSMUSG00000006219.13	MGI:1921452	Fblim1	filamin binding LIM protein 1	2.45678	1.22059e-06	0.000142169	0.463804	0.376366	0.991229
ENSMUSG00000006519.12	MGI:1316658	Cyba	cytochrome b-245, alpha polypeptide	1.75915	1.08915e-05	0.000730433	0.40836	0.316699	0.972342
ENSMUSG00000007041.10	MGI:2148924	Clic1	chloride intracellular channel 1	1.42807	9.05377e-05	0.00348408	0.153162	0.677319	0.998747
ENSMUSG00000007379.16	MGI:3036254	Dennd2c	DENN/MADD domain containing 2C	2.41193	1.0633e-05	0.000720233	-0.207133	0.720861	0.998747
ENSMUSG00000007655.17	MGI:102709	Cav1	caveolin 1, caveolae protein	1.23339	0.000189955	0.00628821	0.110926	0.738248	0.998747
ENSMUSG00000007891.17	MGI:88562	Ctsd	cathepsin D	2.48786	7.99295e-09	3.47327e-06	0.111931	0.795264	0.998747
ENSMUSG00000008398.17	MGI:101762	Elk3	ELK3, member of ETS oncogene family	0.973257	0.000228006	0.00721168	0.325578	0.220501	0.940291
ENSMUSG00000008540.12	MGI:1913850	Mgst1	microsomal glutathione S-transferase 1	0.833627	0.000158289	0.00547029	0.146552	0.514038	0.998258
ENSMUSG00000009356.13	MGI:1923363	Lpo	lactoperoxidase	1.50944	0.000334462	0.00985655	0.391578	0.384097	0.993101
ENSMUSG00000009585.19	MGI:1933111	Apobec3	apolipoprotein B mRNA editing enzyme, catalytic polypeptide 3	1.62549	4.07496e-06	0.000345677	0.00643889	0.985805	0.998747
ENSMUSG00000010358.14	MGI:1917360	Ifi35	interferon-induced protein 35	1.35549	0.000316958	0.00944184	0.111931	0.770216	0.998747
ENSMUSG00000011148.15	MGI:87947	Adssl1	adenylosuccinate synthetase like 1	1.30809	0.000309811	0.00926654	0.398105	0.277883	0.960327
ENSMUSG00000013707.4	MGI:1917019	Tnfaip8l2	tumor necrosis factor, alpha-induced protein 8-like 2	1.86283	6.8507e-06	0.000517643	0.695984	0.106501	0.862659
ENSMUSG00000015133.18	MGI:2142227	Lrrk1	leucine-rich repeat kinase 1	1.4254	0.00017433	0.00585908	0.372414	0.333963	0.979744
ENSMUSG00000015243.5	MGI:99607	Abca1	ATP-binding cassette, sub-family A (ABC1), member 1	1.1757	0.000241564	0.00755367	0.0271003	0.932665	0.998747
ENSMUSG00000015314.11	MGI:1353620	Slamf6	SLAM family member 6	2.29425	0.000329367	0.00976742	0.140033	0.850542	0.998747
ENSMUSG00000015340.11	MGI:88574	Cybb	cytochrome b-245, beta polypeptide	3.24178	1.93406e-06	0.00019803	-0.229857	0.747715	0.998747
ENSMUSG00000015355.14	MGI:88339	Cd48	CD48 antigen	3.0001	3.64496e-09	1.91048e-06	0.726537	0.193957	0.928543
ENSMUSG00000015451.17	MGI:98320	C4a	complement component 4A (Rodgers blood group)	2.14323	2.50227e-09	1.48878e-06	0.763486	0.0348019	0.670801
ENSMUSG00000015839.7	MGI:108420	Nfe2l2	nuclear factor, erythroid derived 2, like 2	1.06347	0.000235041	0.00738117	0.151831	0.601776	0.998274
ENSMUSG00000015850.12	MGI:2389008	Adamtsl4	ADAMTS-like 4	1.41703	7.94897e-05	0.00314414	0.582434	0.111392	0.869128
ENSMUSG00000015852.14	MGI:1933397	Fcrls	Fc receptor-like S, scavenger receptor	2.05331	3.13002e-06	0.000282394	-0.202864	0.645844	0.998274
ENSMUSG00000015854.8	MGI:1334419	Cd5l	CD5 antigen-like	6.40266	5.16491e-05	0.00226003	0.699046	0.727753	0.998747
ENSMUSG00000015947.11	MGI:95498	Fcgr1	Fc receptor, IgG, high affinity I	2.614	8.04655e-09	3.47327e-06	0.271339	0.556952	0.998258
ENSMUSG00000015950.14	MGI:97283	Ncf1	neutrophil cytosolic factor 1	1.98592	4.75356e-07	6.85074e-05	0.219722	0.582295	0.998274
ENSMUSG00000016206.7	MGI:95915	H2-M3	histocompatibility 2, M region locus 3	1.47478	0.000132134	0.00472208	0.306056	0.449635	0.998208
ENSMUSG00000016256.11	MGI:1891190	Ctsz	cathepsin Z	2.13468	1.67081e-07	3.11704e-05	0.246483	0.547025	0.998258
ENSMUSG00000016496.8	MGI:1926446	Cd274	CD274 antigen	1.2935	2.70429e-06	0.000251191	0.168989	0.550194	0.998258
ENSMUSG00000016918.16	MGI:2138563	Sulf1	sulfatase 1	2.99963	8.21154e-10	6.64327e-07	1.16312	0.01781	0.54818
ENSMUSG00000017057.10	MGI:105052	Il13ra1	interleukin 13 receptor, alpha 1	1.30528	3.35072e-05	0.00163515	-0.191695	0.54791	0.998258
ENSMUSG00000017607.10	MGI:2144377	Tns4	tensin 4	2.95677	4.4943e-05	0.00206509	0.595841	0.434069	0.994775
ENSMUSG00000017830.16	MGI:1931560	Dhx58	DEXH (Asp-Glu-X-His) box polypeptide 58	1.87037	3.98871e-05	0.00187623	0.0715002	0.878362	0.998747
ENSMUSG00000018381.16	MGI:1913860	Abi3	ABI family member 3	1.67414	1.09216e-05	0.000730433	0.417524	0.280357	0.961151
ENSMUSG00000018593.14	MGI:98373	Sparc	secreted acidic cysteine rich glycoprotein	1.5399	1.09891e-05	0.000730856	-0.00853191	0.980569	0.998747
ENSMUSG00000018654.18	MGI:1342540	Ikzf1	IKAROS family zinc finger 1	1.5559	1.85812e-05	0.00107396	0.228243	0.53932	0.998258
ENSMUSG00000018774.14	MGI:88342	Cd68	CD68 antigen	2.62439	1.05658e-08	4.22899e-06	0.493826	0.285738	0.961307
ENSMUSG00000018819.11	MGI:96832	Lsp1	lymphocyte specific 1	1.99771	4.50308e-05	0.00206509	0.457801	0.356964	0.986207
ENSMUSG00000018822.8	MGI:1860298	Sfrp5	secreted frizzled-related sequence protein 5	5.65064	0.000100136	0.00376094	3.41326	0.0256778	0.621334
ENSMUSG00000018920.12	MGI:1932682	Cxcl16	chemokine (C-X-C motif) ligand 16	2.78253	1.71938e-08	5.91414e-06	0.212805	0.681959	0.998747
ENSMUSG00000018927.4	MGI:98263	Ccl6	chemokine (C-C motif) ligand 6	2.8918	9.70369e-12	2.93191e-08	0.114792	0.798787	0.998747
ENSMUSG00000018930.4	MGI:98261	Ccl4	chemokine (C-C motif) ligand 4	2.719	0.000150266	0.00524239	1.54606	0.0992078	0.845884
ENSMUSG00000019122.9	MGI:104533	Ccl9	chemokine (C-C motif) ligand 9	1.88684	2.91288e-07	4.74994e-05	-0.245075	0.51972	0.998258
ENSMUSG00000019832.6	MGI:1915094	Rab32	RAB32, member RAS oncogene family	1.28666	0.000248714	0.00770069	0.761098	0.0327658	0.670111
ENSMUSG00000019942.14	MGI:88351	Cdk1	cyclin-dependent kinase 1	2.00816	0.000252193	0.00778652	0.875851	0.121657	0.874839
ENSMUSG00000019997.12	MGI:95537	Ccn2	cellular communication network factor 2	2.48765	0.000108905	0.00404287	-0.13998	0.829703	0.998747
ENSMUSG00000020009.14	MGI:107655	Ifngr1	interferon gamma receptor 1	0.981877	0.000281683	0.00854128	0.0954152	0.725887	0.998747
ENSMUSG00000020101.15	MGI:1921298	Vsir	V-set immunoregulatory receptor	1.28362	4.60314e-05	0.00209051	0.215161	0.496193	0.998258
ENSMUSG00000020120.16	MGI:1860485	Plek	pleckstrin	2.02375	9.14582e-08	2.01667e-05	0.22506	0.554825	0.998258
ENSMUSG00000020143.16	MGI:2149010	Dock2	dedicator of cyto-kinesis 2	1.81064	1.5013e-06	0.000165904	0.111285	0.770401	0.998747
ENSMUSG00000020241.14	MGI:88460	Col6a2	collagen, type VI, alpha 2	2.64334	8.06783e-06	0.00059005	0.61038	0.29945	0.964105
ENSMUSG00000020256.15	MGI:2444680	Aldh1l2	aldehyde dehydrogenase 1 family, member L2	1.45883	1.07091e-05	0.000723159	0.543452	0.103373	0.853066
ENSMUSG00000020282.19	MGI:104328	Rhbdf1	rhomboid 5 homolog 1	1.34246	0.000274328	0.00836435	-0.317591	0.391765	0.993554
ENSMUSG00000020377.16	MGI:107498	Ltc4s	leukotriene C4 synthase	1.59443	9.47144e-05	0.00358871	0.475744	0.258158	0.955211
ENSMUSG00000020388.13	MGI:1353470	Pdlim4	PDZ and LIM domain 4	1.20853	7.39791e-05	0.00298274	0.261745	0.39573	0.993554
ENSMUSG00000020399.15	MGI:2159682	Havcr2	hepatitis A virus cellular receptor 2	1.88871	1.50022e-06	0.000165904	0.1321	0.739957	0.998747
ENSMUSG00000020432.13	MGI:98534	Tcn2	transcobalamin 2	1.19333	0.000329663	0.00976742	0.0253778	0.939407	0.998747
ENSMUSG00000020573.18	MGI:1353576	Pik3cg	phosphatidylinositol-4,5-bisphosphate 3-kinase catalytic subunit gamma	1.47767	3.9274e-05	0.00185531	0.0218445	0.952285	0.998747
ENSMUSG00000020641.17	MGI:1929628	Rsad2	radical S-adenosyl methionine domain containing 2	2.36522	7.73056e-06	0.000574934	-0.141024	0.792904	0.998747
ENSMUSG00000020932.15	MGI:95697	Gfap	glial fibrillary acidic protein	2.14315	9.12977e-09	3.77308e-06	0.78715	0.0348466	0.670801
ENSMUSG00000021091.9	MGI:105045	Serpina3n	serine (or cysteine) peptidase inhibitor, clade A, member 3N	2.55582	2.64952e-07	4.4524e-05	0.674247	0.174734	0.913945
ENSMUSG00000021190.15	MGI:1330838	Lgmn	legumain	1.32444	7.12127e-05	0.00288706	0.180318	0.589025	0.998274
ENSMUSG00000021208.10	MGI:1916390	Ifi27l2b	interferon, alpha-inducible protein 27 like 2B	5.55666	1.06051e-05	0.000720233	-1.44892	0.356238
ENSMUSG00000021242.10	MGI:1915213	Npc2	NPC intracellular cholesterol transporter 2	1.4174	2.63125e-06	0.000247737	0.20924	0.488824	0.998258
ENSMUSG00000021423.7	MGI:1321404	Ly86	lymphocyte antigen 86	2.73577	1.56377e-09	1.13535e-06	0.452638	0.320431	0.972722
ENSMUSG00000021477.10	MGI:88564	Ctsl	cathepsin L	1.55288	3.45307e-06	0.000305141	0.0217454	0.948232	0.998747
ENSMUSG00000021624.10	MGI:1194924	Cd180	CD180 antigen	2.79945	6.76361e-10	6.00007e-07	0.168984	0.714359	0.998747
ENSMUSG00000021647.8	MGI:1351330	Cartpt	CART prepropeptide	7.22912	1.3587e-12	6.37452e-09	-1.64872	0.11439	0.869128
ENSMUSG00000021665.10	MGI:96074	Hexb	hexosaminidase B	1.75293	9.31511e-07	0.000117179	0.13683	0.701981	0.998747
ENSMUSG00000021709.15	MGI:1890169	Erbin	Erbb2 interacting protein	0.684846	0.000187215	0.00622181	0.310844	0.0905529	0.835254
ENSMUSG00000021822.4	MGI:97611	Plau	plasminogen activator, urokinase	1.76527	5.05879e-05	0.00222728	0.775367	0.0877804	0.833107
ENSMUSG00000021886.8	MGI:108031	Gpr65	G-protein coupled receptor 65	4.26839	1.3836e-08	5.25148e-06	1.1299	0.170306	0.91158
ENSMUSG00000021903.12	MGI:1926004	Galnt15	polypeptide N-acetylgalactosaminyltransferase 15	1.42902	9.06797e-05	0.00348408	0.133816	0.719052	0.998747
ENSMUSG00000021998.17	MGI:104808	Lcp1	lymphocyte cytosolic protein 1	1.68566	2.44441e-05	0.00130928	0.149487	0.709967	0.998747
ENSMUSG00000022014.16	MGI:1915168	Epsti1	epithelial stromal interaction 1 (breast)	2.63563	9.22327e-07	0.00011669	1.21006	0.0357418	0.673422
ENSMUSG00000022015.9	MGI:1100089	Tnfsf11	tumor necrosis factor (ligand) superfamily, member 11	4.92959	0.000127443	0.00459923	0.282281	0.851308
ENSMUSG00000022025.14	MGI:1341171	Cnmd	chondromodulin	1.87172	7.85702e-06	0.000578467	0.499231	0.267252	0.957528
ENSMUSG00000022090.11	MGI:2384850	Pdlim2	PDZ and LIM domain 2	1.19588	5.89961e-05	0.00250722	0.62652	0.0377612	0.684876
ENSMUSG00000022144.5	MGI:107430	Gdnf	glial cell line derived neurotrophic factor	5.05713	1.85873e-05	0.00107396	0.286316	0.834128	0.998747
ENSMUSG00000022146.13	MGI:1330819	Osmr	oncostatin M receptor	2.09108	1.52942e-07	2.92803e-05	0.31558	0.432787	0.993924
ENSMUSG00000022148.17	MGI:1346327	Fyb	FYN binding protein	1.65852	2.20528e-06	0.00021868	0.32941	0.351669	0.982708
ENSMUSG00000022218.17	MGI:98730	Tgm1	transglutaminase 1, K polypeptide	5.66971	2.22183e-09	1.35865e-06	2.89824	0.0338691	0.670111
ENSMUSG00000022372.15	MGI:104295	Sla	src-like adaptor	1.59131	7.2896e-05	0.00294446	-0.0946459	0.816013	0.998747
ENSMUSG00000022483.18	MGI:88452	Col2a1	collagen, type II, alpha 1	2.43156	1.34221e-05	0.000841804	0.137897	0.806978	0.998747
ENSMUSG00000022488.10	MGI:1926063	Nckap1l	NCK associated protein 1 like	1.55317	1.60864e-05	0.000978248	0.161798	0.654988	0.998274
ENSMUSG00000022491.6	MGI:95759	Glycam1	glycosylation dependent cell adhesion molecule 1	3.73506	3.1941e-08	9.13182e-06	0.019162	0.979483	0.998747
ENSMUSG00000022500.16	MGI:1929512	Litaf	LPS-induced TN factor	1.22241	5.78984e-05	0.00247972	0.396065	0.196043	0.929777
ENSMUSG00000022575.6	MGI:1916396	Gsdmd	gasdermin D	1.39556	6.19598e-05	0.00260719	0.523429	0.144229	0.891404
ENSMUSG00000022686.15	MGI:2137302	B3gnt5	UDP-GlcNAc:betaGal beta-1,3-N-acetylglucosaminyltransferase 5	1.80773	5.99369e-06	0.000462965	0.600343	0.149905	0.89813
ENSMUSG00000022817.16	MGI:96614	Itgb5	integrin beta 5	1.35434	3.27266e-05	0.00160963	0.218348	0.503969	0.998258
ENSMUSG00000022831.15	MGI:104568	Hcls1	hematopoietic cell specific Lyn substrate 1	1.60968	1.74373e-05	0.00103468	0.282484	0.460837	0.998258
ENSMUSG00000022876.19	MGI:1914992	Samsn1	SAM domain, SH3 domain and nuclear localization signals, 1	1.95721	1.50726e-06	0.000165904	-0.129315	0.760363	0.998747
ENSMUSG00000022901.14	MGI:101773	Cd86	CD86 antigen	1.96806	1.27455e-07	2.57413e-05	0.535378	0.166283	0.910548
ENSMUSG00000022906.16	MGI:1933117	Parp9	poly (ADP-ribose) polymerase family, member 9	1.61077	3.17108e-06	0.000284931	0.224215	0.52437	0.998258
ENSMUSG00000022912.9	MGI:1095733	Pros1	protein S (alpha)	1.26886	7.48239e-05	0.00301129	0.208231	0.518344	0.998258
ENSMUSG00000022952.18	MGI:99852	Runx1	runt related transcription factor 1	2.3087	1.00183e-05	0.000695721	0.334756	0.537341	0.998258
ENSMUSG00000023031.9	MGI:95314	Cela1	chymotrypsin-like elastase family, member 1	2.32566	9.39369e-07	0.000117496	0.107914	0.821575	0.998747
ENSMUSG00000023045.14	MGI:1332226	Soat2	sterol O-acyltransferase 2	2.88348	0.000333784	0.00984977	2.68028	0.0347388
ENSMUSG00000023078.7	MGI:1888499	Cxcl13	chemokine (C-X-C motif) ligand 13	7.28993	3.11959e-06	0.000282394	1.32734	0.469709	0.998258
ENSMUSG00000023186.15	MGI:1915026	Vwa5a	von Willebrand factor A domain containing 5A	0.857652	0.000162523	0.00558158	0.134717	0.554791	0.998258
ENSMUSG00000023224.13	MGI:894696	Serping1	serine (or cysteine) peptidase inhibitor, clade G, member 1	1.6495	1.00767e-05	0.000695906	0.626524	0.0963597	0.844887
ENSMUSG00000023249.16	MGI:1891258	Parp3	poly (ADP-ribose) polymerase family, member 3	2.11247	1.10226e-06	0.000129761	0.226828	0.60465	0.998274
ENSMUSG00000023341.16	MGI:97244	Mx2	MX dynamin-like GTPase 2	2.35721	4.49214e-06	0.00036762	0.342578	0.522313	0.998258
ENSMUSG00000023905.16	MGI:1351484	Tnfrsf12a	tumor necrosis factor receptor superfamily, member 12a	2.10114	9.95025e-06	0.000695525	0.281941	0.562445	0.998258
ENSMUSG00000023992.15	MGI:1913150	Trem2	triggering receptor expressed on myeloid cells 2	2.45493	1.59879e-09	1.13535e-06	0.418722	0.306889	0.968239
ENSMUSG00000024079.5	MGI:1353449	Eif2ak2	eukaryotic translation initiation factor 2-alpha kinase 2	1.72524	2.14187e-07	3.86484e-05	0.281697	0.401105	0.993554
ENSMUSG00000024164.16	MGI:88227	C3	complement component 3	5.14921	1.85152e-15	4.07594e-11	2.28186	0.00226841	0.227738
ENSMUSG00000024256.8	MGI:105094	Adcyap1	adenylate cyclase activating polypeptide 1	3.26711	0.000170757	0.00579097	-2.09387	0.0162216	0.534892
ENSMUSG00000024300.18	MGI:107711	Myo1f	myosin IF	2.00831	1.50225e-06	0.000165904	0.395784	0.353487	0.983735
ENSMUSG00000024308.16	MGI:1201689	Tapbp	TAP binding protein	0.961837	0.000100285	0.00376094	0.174248	0.483708	0.998258
ENSMUSG00000024334.10	MGI:95924	H2-Oa	histocompatibility 2, O region alpha locus	1.8021	6.76549e-05	0.00277784	1.37146	0.00954425	0.422038
ENSMUSG00000024338.16	MGI:1346527	Psmb8	proteasome (prosome, macropain) subunit, beta type 8 (large multifunctional peptidase 7)	2.04408	1.21706e-07	2.48077e-05	0.592587	0.134911	0.881442
ENSMUSG00000024349.11	MGI:1919762	Sting1	stimulator of interferon response cGAMP interactor 1	1.29426	0.000171708	0.00580641	0.199719	0.568215	0.998258
ENSMUSG00000024397.15	MGI:1343098	Aif1	allograft inflammatory factor 1	1.99962	4.31743e-07	6.50986e-05	0.0742175	0.85322	0.998747
ENSMUSG00000024411.12	MGI:107387	Aqp4	aquaporin 4	1.14477	7.74432e-07	0.000103195	0.158198	0.494916	0.998258
ENSMUSG00000024621.17	MGI:1339758	Csf1r	colony stimulating factor 1 receptor	1.18973	5.0538e-05	0.00222728	0.208113	0.478806	0.998258
ENSMUSG00000024672.12	MGI:1918846	Ms4a7	membrane-spanning 4-domains, subfamily A, member 7	3.23727	7.95533e-05	0.00314414	0.157692	0.853682	0.998747
ENSMUSG00000024675.20	MGI:1927656	Ms4a4c	membrane-spanning 4-domains, subfamily A, member 4C	3.25713	4.10979e-05	0.00192087	-0.838746	0.430092	0.993911
ENSMUSG00000024677.14	MGI:1917024	Ms4a6b	membrane-spanning 4-domains, subfamily A, member 6B	1.71067	8.79589e-05	0.00341504	-0.443663	0.320025	0.972399
ENSMUSG00000024679.11	MGI:1916024	Ms4a6d	membrane-spanning 4-domains, subfamily A, member 6D	2.02522	0.000243333	0.00756602	-0.388402	0.507815	0.998258
ENSMUSG00000024691.14	MGI:1915508	Fam111a	family with sequence similarity 111, member A	2.02925	5.47589e-06	0.000430522	0.420488	0.353489	0.983735
ENSMUSG00000024737.3	MGI:1929691	Slc15a3	solute carrier family 15, member 3	2.39369	1.69083e-06	0.000179816	0.201293	0.697883	0.998747
ENSMUSG00000024778.14	MGI:95484	Fas	Fas (TNF receptor superfamily member 6)	1.52448	0.000204263	0.00661272	0.114022	0.790202	0.998747
ENSMUSG00000024810.17	MGI:1924375	Il33	interleukin 33	1.22785	1.0775e-05	0.000725388	0.167196	0.549692	0.998258
ENSMUSG00000024816.13	MGI:1914707	Frmd8	FERM domain containing 8	0.907926	0.000262204	0.00808426	0.391113	0.118393	0.874839
ENSMUSG00000024818.16	MGI:2147731	Slc25a45	solute carrier family 25, member 45	1.26376	3.84652e-05	0.00183613	0.0973943	0.754309	0.998747
ENSMUSG00000024910.6	MGI:1338045	Ctsw	cathepsin W	2.99674	7.50857e-05	0.00301631	-0.0837117	0.913486
ENSMUSG00000024940.12	MGI:1101355	Ltbp3	latent transforming growth factor beta binding protein 3	0.825562	8.62366e-06	0.000621604	0.474753	0.0106573	0.443767
ENSMUSG00000024965.10	MGI:2147790	Fermt3	fermitin family member 3	1.47151	0.000149151	0.00521176	0.207203	0.59948	0.998274
ENSMUSG00000024998.18	MGI:1921305	Plce1	phospholipase C, epsilon 1	1.42187	1.19927e-05	0.000776492	-0.107754	0.741081	0.998747
ENSMUSG00000025017.11	MGI:1933177	Pik3ap1	phosphoinositide-3-kinase adaptor protein 1	2.47402	2.29038e-07	3.97012e-05	0.653454	0.177837	0.916995
ENSMUSG00000025044.17	MGI:98257	Msr1	macrophage scavenger receptor 1	3.88087	2.11109e-05	0.00118253	-0.413951	0.662093	0.998747
ENSMUSG00000025058.5	MGI:1918648	Tasl	TLR adaptor interacting with endolysosomal SLC15A4	2.01669	0.000232436	0.00733072	-0.502549	0.426594	0.993911
ENSMUSG00000025161.17	MGI:1933438	Slc16a3	solute carrier family 16 (monocarboxylic acid transporters), member 3	1.86921	7.93809e-05	0.00314414	0.0811504	0.868341	0.998747
ENSMUSG00000025225.16	MGI:1099800	Nfkb2	nuclear factor of kappa light polypeptide gene enhancer in B cells 2, p49/p100	1.58518	3.99264e-06	0.000342	0.460321	0.194637	0.929307
ENSMUSG00000025232.9	MGI:96073	Hexa	hexosaminidase A	1.43796	1.38632e-05	0.000862105	0.0742146	0.822812	0.998747
ENSMUSG00000025351.15	MGI:99529	Cd63	CD63 antigen	1.24918	3.16129e-05	0.00157449	0.152978	0.611136	0.998274
ENSMUSG00000025355.8	MGI:1927899	Mmp19	matrix metallopeptidase 19	1.64664	6.06381e-05	0.00256709	1.41449	0.000710251	0.120466
ENSMUSG00000025492.7	MGI:1913391	Ifitm3	interferon induced transmembrane protein 3	2.12562	8.06571e-08	1.86904e-05	0.618836	0.120802	0.874839
ENSMUSG00000025498.16	MGI:1859212	Irf7	interferon regulatory factor 7	3.15516	2.83734e-09	1.56153e-06	0.334619	0.536515	0.998258
ENSMUSG00000025534.18	MGI:95872	Gusb	glucuronidase, beta	1.7978	1.2738e-05	0.000810444	-0.0408909	0.9213	0.998747
ENSMUSG00000025647.17	MGI:1915044	Shisa5	shisa family member 5	0.789352	0.000268971	0.00826972	0.241068	0.267372	0.957528
ENSMUSG00000025789.10	MGI:106020	St8sia2	ST8 alpha-N-acetyl-neuraminide alpha-2,8-sialyltransferase 2	0.956387	0.000306197	0.00918847	1.02357	0.000169877	0.0556611
ENSMUSG00000025877.15	MGI:2670962	Hk3	hexokinase 3	1.78725	0.000117171	0.00430618	0.265304	0.578243	0.998274
ENSMUSG00000026029.15	MGI:1261423	Casp8	caspase 8	1.27996	8.27616e-05	0.00324544	0.330297	0.327385	0.977804
ENSMUSG00000026051.9	MGI:1926146	Ecrg4	ECRG4 augurin precursor	4.51725	2.86042e-11	4.35612e-08	1.45962	0.0400392	0.690446
ENSMUSG00000026177.12	MGI:1345275	Slc11a1	solute carrier family 11 (proton-coupled divalent metal ion transporters), member 1	1.94862	1.63086e-06	0.000176647	0.614394	0.142439	0.888435
ENSMUSG00000026222.17	MGI:109561	Sp100	nuclear antigen Sp100	1.40333	4.32424e-05	0.00201682	0.203692	0.5585	0.998258
ENSMUSG00000026227.12	MGI:1920042	2810459M11Rik	RIKEN cDNA 2810459M11 gene	0.74401	1.74218e-05	0.00103468	0.169729	0.331804	0.979438
ENSMUSG00000026285.9	MGI:104879	Pdcd1	programmed cell death 1	3.05044	2.64964e-05	0.00138549	1.84594	0.10132	0.849778
ENSMUSG00000026288.15	MGI:107357	Inpp5d	inositol polyphosphate-5-phosphatase D	1.42853	6.44385e-05	0.00268664	0.206431	0.565803	0.998258
ENSMUSG00000026358.14	MGI:1354694	Rgs1	regulator of G-protein signaling 1	3.50164	0.000134346	0.00477787	1.39249	0.20899	0.935159
ENSMUSG00000026385.17	MGI:94865	Dbi	diazepam binding inhibitor	0.845524	0.000212245	0.00682408	-0.111171	0.6266	0.998274
ENSMUSG00000026395.17	MGI:97810	Ptprc	protein tyrosine phosphatase, receptor type, C	2.18922	2.56917e-08	7.74763e-06	0.440228	0.270248	0.957879
ENSMUSG00000026407.18	MGI:88294	Cacna1s	calcium channel, voltage-dependent, L type, alpha 1S subunit	4.61011	9.3879e-08	2.04619e-05	-0.407458	0.656555	0.998274
ENSMUSG00000026433.14	MGI:2385107	Rab29	RAB29, member RAS oncogene family	1.31508	0.000200254	0.00651164	0.00163114	0.996354	0.999634
ENSMUSG00000026480.13	MGI:97284	Ncf2	neutrophil cytosolic factor 2	1.68651	6.8668e-06	0.000517643	0.0783214	0.838466	0.998747
ENSMUSG00000026536.10	MGI:3041120	Ifi211	interferon activated gene 211	3.22949	4.53423e-07	6.65443e-05	0.0586484	0.928186	0.998747
ENSMUSG00000026548.5	MGI:1923692	Slamf9	SLAM family member 9	2.66909	1.60206e-07	3.02937e-05	0.332847	0.539327	0.998258
ENSMUSG00000026628.14	MGI:109384	Atf3	activating transcription factor 3	1.91301	0.000187383	0.00622181	-0.139078	0.793511	0.998747
ENSMUSG00000026649.15	MGI:1922722	Cfap126	cilia and flagella associated protein 126	1.67466	9.06867e-05	0.00348408	0.407123	0.359292	0.986811
ENSMUSG00000026656.16	MGI:95499	Fcgr2b	Fc receptor, IgG, low affinity IIb	2.72921	1.08319e-08	4.25809e-06	0.277423	0.565997	0.998258
ENSMUSG00000026676.8	MGI:1921436	Ccdc3	coiled-coil domain containing 3	1.51694	3.40704e-05	0.00165569	0.464334	0.205429	0.935159
ENSMUSG00000026728.10	MGI:98932	Vim	vimentin	2.57765	1.93277e-08	6.16636e-06	0.70889	0.122939	0.874839
ENSMUSG00000026786.15	MGI:1861354	Apbb1ip	amyloid beta (A4) precursor protein-binding, family B, member 1 interacting protein	1.5173	2.92431e-05	0.00148674	-0.146845	0.689819	0.998747
ENSMUSG00000026796.17	MGI:2442910	Niban2	niban apoptosis regulator 2	0.917355	3.26251e-05	0.00160963	0.629762	0.00451671	0.31241
ENSMUSG00000026822.15	MGI:96757	Lcn2	lipocalin 2	6.00018	3.92697e-05	0.00185531	0.761142	0.610496	0.998274
ENSMUSG00000026879.15	MGI:95851	Gsn	gelsolin	1.09371	1.04237e-05	0.00071081	0.419878	0.0917158	0.838774
ENSMUSG00000026896.15	MGI:1918836	Ifih1	interferon induced with helicase C domain 1	1.49267	1.00842e-05	0.000695906	0.191307	0.577679	0.998274
ENSMUSG00000026928.15	MGI:2685628	Card9	caspase recruitment domain family, member 9	1.60777	4.90066e-05	0.00219058	0.172586	0.671484	0.998747
ENSMUSG00000027015.5	MGI:2654575	Cybrd1	cytochrome b reductase 1	1.67927	5.3747e-06	0.000425443	0.131686	0.724123	0.998747
ENSMUSG00000027074.15	MGI:1931054	Slc43a3	solute carrier family 43, member 3	3.7796	1.44783e-12	6.37452e-09	0.904752	0.12139	0.874839
ENSMUSG00000027078.15	MGI:1914500	Ube2l6	ubiquitin-conjugating enzyme E2L 6	1.08254	8.22932e-05	0.00323501	0.213495	0.449006	0.997793
ENSMUSG00000027107.4	MGI:87885	Chrna1	cholinergic receptor, nicotinic, alpha polypeptide 1 (muscle)	2.52656	3.81309e-07	5.78906e-05	0.131656	0.793296	0.998747
ENSMUSG00000027111.17	MGI:96605	Itga6	integrin alpha 6	0.911092	0.000225103	0.00714036	0.11324	0.647381	0.998274
ENSMUSG00000027115.15	MGI:2446977	Kif18a	kinesin family member 18A	1.92759	1.96261e-05	0.00111353	0.666291	0.145712	0.893328
ENSMUSG00000027215.14	MGI:104651	Cd82	CD82 antigen	0.934248	0.000167576	0.00571324	0.314904	0.20845	0.935159
ENSMUSG00000027230.10	MGI:1347062	Creb3l1	cAMP responsive element binding protein 3-like 1	1.51893	0.000274063	0.00836435	0.217095	0.608286	0.998274
ENSMUSG00000027293.14	MGI:1919619	Ehd4	EH-domain containing 4	1.23957	0.000242132	0.0075607	-0.0265078	0.93788	0.998747
ENSMUSG00000027315.14	MGI:1338033	Spint1	serine protease inhibitor, Kunitz type 1	2.50138	3.52012e-07	5.45718e-05	0.450034	0.362751	0.987645
ENSMUSG00000027318.18	MGI:1341813	Adam33	a disintegrin and metallopeptidase domain 33	3.42214	1.68216e-05	0.00101178	0.602388	0.509453	0.998258
ENSMUSG00000027322.12	MGI:99668	Siglec1	sialic acid binding Ig-like lectin 1, sialoadhesin	3.69515	4.10144e-06	0.000345677	1.0305	0.216117	0.93818
ENSMUSG00000027368.7	MGI:101911	Dusp2	dual specificity phosphatase 2	2.2855	5.63004e-05	0.00243497	0.20965	0.721741	0.998747
ENSMUSG00000027399.2	MGI:96542	Il1a	interleukin 1 alpha	1.76843	0.000182205	0.00608659	0.749142	0.12583	0.875557
ENSMUSG00000027422.16	MGI:1932395	Rrbp1	ribosome binding protein 1	0.951804	0.000161855	0.0055673	0.137287	0.587186	0.998274
ENSMUSG00000027447.7	MGI:102519	Cst3	cystatin C	0.808547	3.30054e-05	0.00161462	0.401905	0.0390832	0.688242
ENSMUSG00000027514.15	MGI:1927449	Zbp1	Z-DNA binding protein 1	4.19071	1.23599e-06	0.000142466	0.103386	0.913886	0.998747
ENSMUSG00000027570.16	MGI:894686	Col9a3	collagen, type IX, alpha 3	1.00366	0.000147639	0.00517535	0.607389	0.0227704	0.600411
ENSMUSG00000027656.8	MGI:1328326	Ccn5	cellular communication network factor 5	8.379	1.64704e-06	0.000176647	-0.962252	0.592281	0.998274
ENSMUSG00000027712.14	MGI:106008	Anxa5	annexin A5	1.0894	2.99543e-05	0.0015153	0.218692	0.403768	0.993554
ENSMUSG00000027762.7	MGI:1934135	Sucnr1	succinate receptor 1	5.08215	8.28535e-05	0.00324544	1.27935	0.355339	0.984284
ENSMUSG00000027832.6	MGI:104641	Ptx3	pentraxin related gene	2.77806	5.04539e-06	0.000405362	1.02242	0.10447	0.856447
ENSMUSG00000027848.13	MGI:1914877	Olfml3	olfactomedin-like 3	1.80594	2.28185e-06	0.000224639	0.0430736	0.910553	0.998747
ENSMUSG00000027864.10	MGI:1277114	Ptgfrn	prostaglandin F2 receptor negative regulator	1.91451	4.47388e-07	6.63304e-05	0.251092	0.509598	0.998258
ENSMUSG00000027907.5	MGI:1338798	S100a11	S100 calcium binding protein A11	1.92852	1.12422e-05	0.000741583	0.330622	0.461378	0.998258
ENSMUSG00000027962.15	MGI:98926	Vcam1	vascular cell adhesion molecule 1	1.04958	4.38992e-05	0.00203999	0.179816	0.485079	0.998258
ENSMUSG00000027995.11	MGI:1346060	Tlr2	toll-like receptor 2	3.33555	1.53461e-10	1.99798e-07	0.375885	0.488721	0.998258
ENSMUSG00000028037.14	MGI:2443016	Ifi44	interferon-induced protein 44	2.51256	1.29861e-06	0.000146932	0.184162	0.728095	0.998747
ENSMUSG00000028068.15	MGI:3028642	Iqgap3	IQ motif containing GTPase activating protein 3	2.02315	5.6097e-05	0.00243094	0.51417	0.325985	0.977804
ENSMUSG00000028195.5	MGI:88613	Ccn1	cellular communication network factor 1	3.15201	7.78158e-07	0.000103195	-0.307268	0.635741	0.998274
ENSMUSG00000028268.15	MGI:1926263	Gbp3	guanylate binding protein 3	1.93363	6.81313e-08	1.64818e-05	0.50813	0.161213	0.904085
ENSMUSG00000028270.13	MGI:102772	Gbp2	guanylate binding protein 2	1.82892	9.79572e-06	0.000692348	0.350895	0.406815	0.993554
ENSMUSG00000028362.3	MGI:88328	Tnfsf8	tumor necrosis factor (ligand) superfamily, member 8	3.37602	0.000100285	0.00376094	4.0304	0.00234339	0.233021
ENSMUSG00000028459.12	MGI:88345	Cd72	CD72 antigen	4.56525	7.0397e-07	9.56617e-05	0.960539	0.401444	0.993554
ENSMUSG00000028463.15	MGI:2447188	Car9	carbonic anhydrase 9	4.6638	0.000134229	0.00477787	2.06837	0.0688152	0.786552
ENSMUSG00000028480.15	MGI:1917770	Glipr2	GLI pathogenesis-related 2	1.82792	1.20429e-05	0.000777454	0.107509	0.800118	0.998747
ENSMUSG00000028497.13	MGI:1914025	Hacd4	3-hydroxyacyl-CoA dehydratase 4	2.1955	2.19252e-07	3.89879e-05	0.172233	0.686994	0.998747
ENSMUSG00000028581.18	MGI:108046	Laptm5	lysosomal-associated protein transmembrane 5	1.79972	1.52858e-06	0.000167413	0.0689093	0.854265	0.998747
ENSMUSG00000028583.15	MGI:103098	Pdpn	podoplanin	1.25538	3.94782e-05	0.00186097	-0.00660916	0.982888	0.998747
ENSMUSG00000028599.11	MGI:1314883	Tnfrsf1b	tumor necrosis factor receptor superfamily, member 1b	1.44339	0.000330881	0.00979033	0.313116	0.441488	0.99708
ENSMUSG00000028859.15	MGI:1339755	Csf3r	colony stimulating factor 3 receptor (granulocyte)	2.00817	1.01402e-07	2.16627e-05	0.44031	0.248509	0.952727
ENSMUSG00000028874.15	MGI:95527	Fgr	FGR proto-oncogene, Src family tyrosine kinase	3.36267	6.49668e-06	0.00049659	0.770211	0.381477	0.993101
ENSMUSG00000028883.20	MGI:107558	Sema3a	sema domain, immunoglobulin domain (Ig), short basic domain, secreted, (semaphorin) 3A	2.15964	7.64716e-05	0.00306639	1.08411	0.0503853	0.725018
ENSMUSG00000029204.8	MGI:1921984	Rhoh	ras homolog family member H	1.71246	9.37176e-05	0.00356321	0.268461	0.566118	0.998258
ENSMUSG00000029304.15	MGI:98389	Spp1	secreted phosphoprotein 1	4.58724	2.88614e-08	8.58587e-06	0.0957749	0.908601	0.998747
ENSMUSG00000029371.8	MGI:1096868	Cxcl5	chemokine (C-X-C motif) ligand 5	1.83851	0.000325548	0.0096846	0.710115	0.217913	0.938853
ENSMUSG00000029381.17	MGI:1351655	Shroom3	shroom family member 3	1.23679	0.000123983	0.00451879	0.228891	0.485522	0.998258
ENSMUSG00000029417.10	MGI:1352449	Cxcl9	chemokine (C-X-C motif) ligand 9	6.14399	8.31765e-06	0.000606307	-0.00745926	0.996041	0.999634
ENSMUSG00000029484.13	MGI:1201378	Anxa3	annexin A3	1.67641	3.24622e-06	0.000289321	-0.0146914	0.967706	0.998747
ENSMUSG00000029561.18	MGI:1344390	Oasl2	2'-5' oligoadenylate synthetase-like 2	2.66379	2.7841e-07	4.58088e-05	0.621048	0.234193	0.951481
ENSMUSG00000029605.17	MGI:97430	Oas1b	2'-5' oligoadenylate synthetase 1B	2.41612	2.37341e-05	0.00128059	0.495248	0.432135	0.993911
ENSMUSG00000029622.17	MGI:1343142	Arpc1b	actin related protein 2/3 complex, subunit 1B	1.88942	2.63334e-06	0.000247737	0.548276	0.175428	0.914334
ENSMUSG00000029659.17	MGI:1917967	Medag	mesenteric estrogen dependent adipogenesis	1.42314	0.00013747	0.00487836	0.751488	0.0449543	0.704707
ENSMUSG00000029759.10	MGI:106686	Pon3	paraoxonase 3	1.9052	4.03678e-06	0.00034444	0.413277	0.335387	0.979744
ENSMUSG00000029762.7	MGI:107673	Akr1b8	aldo-keto reductase family 1, member B8	2.03507	1.24255e-06	0.000142466	0.470333	0.271748	0.957879
ENSMUSG00000029771.13	MGI:1350924	Irf5	interferon regulatory factor 5	1.49231	3.60759e-05	0.00174161	0.233243	0.527924	0.998258
ENSMUSG00000029798.12	MGI:1914388	Herc6	hect domain and RLD 6	1.36246	5.77406e-05	0.00247972	0.0488791	0.886491	0.998747
ENSMUSG00000029816.11	MGI:1934765	Gpnmb	glycoprotein (transmembrane) nmb	2.4919	5.04193e-05	0.00222728	0.907929	0.140498	0.886544
ENSMUSG00000029915.15	MGI:1345151	Clec5a	C-type lectin domain family 5, member a	1.75095	1.69137e-05	0.00101179	0.0205273	0.960768	0.998747
ENSMUSG00000029919.6	MGI:1859384	Hpgds	hematopoietic prostaglandin D synthase	1.41237	4.46414e-05	0.00206024	-0.0296076	0.932391	0.998747
ENSMUSG00000029925.14	MGI:98497	Tbxas1	thromboxane A synthase 1, platelet	1.87899	2.17858e-05	0.00120255	0.24328	0.590461	0.998274
ENSMUSG00000029994.18	MGI:88030	Anxa4	annexin A4	1.47806	1.63016e-05	0.000987621	0.679969	0.0514072	0.731299
ENSMUSG00000030029.15	MGI:107935	Lrig1	leucine-rich repeats and immunoglobulin-like domains 1	1.12877	6.20591e-05	0.00260719	-0.255818	0.365127	0.989649
ENSMUSG00000030107.11	MGI:1344364	Usp18	ubiquitin specific peptidase 18	3.0321	1.06404e-07	2.23083e-05	0.291642	0.619696	0.998274
ENSMUSG00000030111.10	MGI:2449119	A2m	alpha-2-macroglobulin	3.66635	6.67734e-10	6.00007e-07	0.830529	0.166719	0.910567
ENSMUSG00000030124.3	MGI:106588	Lag3	lymphocyte-activation gene 3	2.42214	1.35315e-11	3.30979e-08	0.991896	0.00636357	0.364729
ENSMUSG00000030208.16	MGI:107941	Emp1	epithelial membrane protein 1	2.25411	2.48174e-05	0.00131827	0.046018	0.932506	0.998747
ENSMUSG00000030220.14	MGI:101940	Arhgdib	Rho, GDP dissociation inhibitor (GDI) beta	1.42751	0.000145986	0.00512556	0.127567	0.738013	0.998747
ENSMUSG00000030259.13	MGI:1918573	Rassf8	Ras association (RalGDS/AF-6) domain family (N-terminal) member 8	0.746365	3.03681e-06	0.000277395	0.592622	0.000197672	0.0598618
ENSMUSG00000030341.18	MGI:1314884	Tnfrsf1a	tumor necrosis factor receptor superfamily, member 1a	1.47072	1.64305e-05	0.000990964	0.0885101	0.797216	0.998747
ENSMUSG00000030342.9	MGI:88348	Cd9	CD9 antigen	1.98304	1.77556e-08	6.0134e-06	0.397403	0.260155	0.955211
ENSMUSG00000030560.18	MGI:109553	Ctsc	cathepsin C	1.38344	3.82489e-05	0.00183445	-0.000868213	0.997952	0.999804
ENSMUSG00000030562.18	MGI:1354184	Nox4	NADPH oxidase 4	4.32972	6.77615e-05	0.00277784	1.26445	0.179791	0.91932
ENSMUSG00000030577.15	MGI:88322	Cd22	CD22 antigen	3.85701	3.82036e-09	1.9114e-06	1.19448	0.100098	0.847549
ENSMUSG00000030579.11	MGI:1277211	Tyrobp	TYRO protein tyrosine kinase binding protein	2.42492	4.3022e-09	2.05888e-06	0.245618	0.554179	0.998258
ENSMUSG00000030671.10	MGI:1333863	Pde3b	phosphodiesterase 3B, cGMP-inhibited	0.913677	0.000200088	0.00651164	0.037242	0.880263	0.998747
ENSMUSG00000030745.10	MGI:1890475	Il21r	interleukin 21 receptor	2.21819	2.28824e-07	3.97012e-05	0.00570376	0.989736	0.999286
ENSMUSG00000030748.10	MGI:105367	Il4ra	interleukin 4 receptor, alpha	1.93449	3.23395e-05	0.00159982	0.387903	0.411496	0.993554
ENSMUSG00000030786.19	MGI:96607	Itgam	integrin alpha M	1.82553	4.08834e-06	0.000345677	0.00796368	0.984007	0.998747
ENSMUSG00000030789.10	MGI:96609	Itgax	integrin alpha X	3.39818	2.40863e-11	4.35612e-08	0.958627	0.0988452	0.845278
ENSMUSG00000030793.5	MGI:1931465	Pycard	PYD and CARD domain containing	2.08563	2.6875e-07	4.48202e-05	0.385158	0.353308	0.983735
ENSMUSG00000030798.16	MGI:88330	Cd37	CD37 antigen	1.81219	1.03552e-06	0.000125252	0.502792	0.184449	0.920874
ENSMUSG00000030830.19	MGI:96606	Itgal	integrin alpha L	2.48161	0.000170988	0.00579097	1.06007	0.152494	0.899617
ENSMUSG00000030847.9	MGI:1352493	Bag3	BCL2-associated athanogene 3	1.30775	2.17961e-05	0.00120255	0.153377	0.621219	0.998274
ENSMUSG00000030921.18	MGI:98178	Trim30a	tripartite motif-containing 30A	2.6542	7.82115e-09	3.47327e-06	0.667713	0.156401	0.902701
ENSMUSG00000031101.7	MGI:1921381	Sash3	SAM and SH3 domain containing 3	1.57226	6.75398e-05	0.00277784	0.165936	0.681329	0.998747
ENSMUSG00000031103.13	MGI:1928377	Elf4	E74-like factor 4 (ets domain transcription factor)	1.98886	5.73043e-06	0.00044733	0.421027	0.355546	0.984284
ENSMUSG00000031138.5	MGI:88384	F9	coagulation factor IX	2.99916	1.8466e-06	0.000192659	-0.400546	0.568884	0.998258
ENSMUSG00000031165.7	MGI:105059	Was	Wiskott-Aldrich syndrome	1.54569	6.67884e-05	0.00275333	0.207956	0.613954	0.998274
ENSMUSG00000031207.17	MGI:97167	Msn	moesin	1.43409	2.72081e-05	0.00141264	0.123724	0.718064	0.998747
ENSMUSG00000031264.14	MGI:88216	Btk	Bruton agammaglobulinemia tyrosine kinase	1.61756	0.000212342	0.00682408	0.536549	0.24195	0.952456
ENSMUSG00000031273.17	MGI:2152695	Col4a6	collagen, type IV, alpha 6	2.49702	1.05266e-06	0.000126473	0.377943	0.464204	0.998258
ENSMUSG00000031274.17	MGI:88456	Col4a5	collagen, type IV, alpha 5	1.46426	0.000139004	0.00491968	0.151318	0.696027	0.998747
ENSMUSG00000031304.19	MGI:96551	Il2rg	interleukin 2 receptor, gamma chain	2.20575	4.37936e-06	0.000361321	0.309182	0.541079	0.998258
ENSMUSG00000031373.5	MGI:1926249	Car5b	carbonic anhydrase 5b, mitochondrial	0.74926	2.25404e-05	0.00123434	-0.081014	0.657801	0.998274
ENSMUSG00000031375.18	MGI:88158	Bgn	biglycan	2.12307	8.56007e-07	0.000110848	0.499184	0.248398	0.952727
ENSMUSG00000031387.15	MGI:105940	Renbp	renin binding protein	1.63213	4.00935e-05	0.00188192	-0.0986444	0.810336	0.998747
ENSMUSG00000031504.7	MGI:102789	Rab20	RAB20, member RAS oncogene family	2.36302	1.50843e-05	0.000922402	0.378888	0.498503	0.998258
ENSMUSG00000031613.10	MGI:108085	Hpgd	hydroxyprostaglandin dehydrogenase 15 (NAD)	1.97263	1.08827e-06	0.000128802	0.506723	0.215899	0.938101
ENSMUSG00000031659.14	MGI:102891	Adcy7	adenylate cyclase 7	1.75317	8.64045e-06	0.000621604	0.394147	0.325544	0.977804
ENSMUSG00000031662.9	MGI:1918857	Snx20	sorting nexin 20	2.14851	2.31874e-05	0.00126069	0.697142	0.187089	0.924879
ENSMUSG00000031838.11	MGI:2137648	Ifi30	interferon gamma inducible protein 30	2.00804	1.95233e-05	0.00111226	0.274465	0.568061	0.998258
ENSMUSG00000031841.20	MGI:99551	Cdh13	cadherin 13	0.890575	0.000173517	0.00584067	0.209888	0.375406	0.991229
ENSMUSG00000031995.10	MGI:1338881	St14	suppression of tumorigenicity 14 (colon carcinoma)	2.66413	4.48952e-07	6.63304e-05	0.499307	0.404911	0.993554
ENSMUSG00000032089.17	MGI:96538	Il10ra	interleukin 10 receptor, alpha	1.69977	7.19481e-06	0.00053873	0.277116	0.469583	0.998258
ENSMUSG00000032122.16	MGI:1929693	Slc37a2	solute carrier family 37 (glycerol-3-phosphate transporter), member 2	1.91665	2.54988e-06	0.000246197	0.166418	0.688734	0.998747
ENSMUSG00000032220.11	MGI:106621	Myo1e	myosin IE	1.80581	4.25581e-06	0.000354877	0.225851	0.568422	0.998258
ENSMUSG00000032231.15	MGI:88246	Anxa2	annexin A2	1.94669	2.60742e-05	0.00136992	0.413526	0.374515	0.991229
ENSMUSG00000032265.15	MGI:2670964	Tent5a	terminal nucleotidyltransferase 5A	2.36573	1.653e-06	0.000176647	-0.431308	0.388813	0.993554
ENSMUSG00000032359.15	MGI:107285	Ctsh	cathepsin H	1.85664	9.70513e-07	0.000119357	0.233582	0.540575	0.998258
ENSMUSG00000032372.15	MGI:1270860	Plscr2	phospholipid scramblase 2	2.69139	1.22851e-09	9.32569e-07	-0.113636	0.805224	0.998747
ENSMUSG00000032440.14	MGI:98729	Tgfbr2	transforming growth factor, beta receptor II	1.5281	1.87126e-05	0.00107837	0.136762	0.702732	0.998747
ENSMUSG00000032501.10	MGI:2443397	Trib1	tribbles pseudokinase 1	1.59465	9.31466e-05	0.00355173	-0.407854	0.321448	0.973598
ENSMUSG00000032554.16	MGI:98821	Trf	transferrin	1.32854	7.02697e-05	0.00286998	0.387856	0.24612	0.952456
ENSMUSG00000032577.17	MGI:2143163	Mapkapk3	mitogen-activated protein kinase-activated protein kinase 3	1.31283	0.000237176	0.00742702	0.147628	0.687698	0.998747
ENSMUSG00000032596.15	MGI:1349462	Uba7	ubiquitin-like modifier activating enzyme 7	1.35821	0.000209958	0.00677715	0.208546	0.574735	0.998258
ENSMUSG00000032609.13	MGI:1925517	Klhdc8b	kelch domain containing 8B	0.650914	0.000169639	0.00577191	0.536769	0.00197606	0.211206
ENSMUSG00000032661.10	MGI:2180850	Oas3	2'-5' oligoadenylate synthetase 3	5.66076	5.39195e-06	0.000425443	2.36158	0.103058	0.852113
ENSMUSG00000032690.17	MGI:2180852	Oas2	2'-5' oligoadenylate synthetase 2	3.25211	3.0255e-07	4.86156e-05	0.951503	0.154097	0.901621
ENSMUSG00000032725.11	MGI:95569	Folr2	folate receptor 2 (fetal)	3.41219	8.32075e-05	0.00324775	0.487098	0.596386	0.998274
ENSMUSG00000033192.6	MGI:3606214	Lpcat2	lysophosphatidylcholine acyltransferase 2	1.28078	2.8965e-05	0.00148553	0.225238	0.46567	0.998258
ENSMUSG00000033207.8	MGI:1918988	Mamdc2	MAM domain containing 2	1.93214	2.28578e-06	0.000224639	0.651325	0.126179	0.875843
ENSMUSG00000033213.17	MGI:3034182	AA467197	expressed sequence AA467197	4.27943	0.000128792	0.00463273	-0.0787169	0.914381	0.998747
ENSMUSG00000033220.8	MGI:97846	Rac2	Rac family small GTPase 2	2.15428	1.21954e-06	0.000142169	0.114315	0.800393	0.998747
ENSMUSG00000033355.7	MGI:1915025	Rtp4	receptor transporter protein 4	2.19518	6.67368e-07	9.12512e-05	0.457591	0.309987	0.969756
ENSMUSG00000033488.12	MGI:2448516	Cryzl2	crystallin zeta like 2	1.40266	2.62609e-07	4.44698e-05	0.180422	0.512758	0.998258
ENSMUSG00000033538.14	MGI:107700	Casp4	caspase 4, apoptosis-related cysteine peptidase	2.71127	4.38234e-06	0.000361321	0.613764	0.341778	0.980899
ENSMUSG00000033581.18	MGI:1890358	Igf2bp2	insulin-like growth factor 2 mRNA binding protein 2	2.07554	0.000115131	0.00425249	0.475519	0.386457	0.993101
ENSMUSG00000033777.5	MGI:3045213	Tlr13	toll-like receptor 13	1.89261	2.17429e-05	0.00120255	-0.0444724	0.922047	0.998747
ENSMUSG00000033880.12	MGI:99554	Lgals3bp	lectin, galactoside-binding, soluble, 3 binding protein	3.06096	1.06547e-11	2.93191e-08	0.558385	0.217323	0.938437
ENSMUSG00000034116.18	MGI:98923	Vav1	vav 1 oncogene	1.75219	1.23753e-05	0.000791949	0.178198	0.662193	0.998747
ENSMUSG00000034164.18	MGI:2155091	Emid1	EMI domain containing 1	1.75061	3.0716e-05	0.00154379	0.866714	0.0413094	0.690938
ENSMUSG00000034205.17	MGI:2137913	Loxl2	lysyl oxidase-like 2	2.97581	3.35736e-05	0.00163515	0.512002	0.493674	0.998258
ENSMUSG00000034227.8	MGI:1347474	Foxj1	forkhead box J1	1.37012	5.08223e-05	0.00223314	1.04942	0.00259451	0.245363
ENSMUSG00000034422.15	MGI:1919489	Parp14	poly (ADP-ribose) polymerase family, member 14	1.92743	1.87384e-06	0.000194579	0.362332	0.375997	0.991229
ENSMUSG00000034459.9	MGI:99450	Ifit1	interferon-induced protein with tetratricopeptide repeats 1	2.24593	2.5167e-06	0.000244064	0.464979	0.33988	0.980506
ENSMUSG00000034591.6	MGI:2442940	Slc41a2	solute carrier family 41, member 2	0.70293	2.64232e-05	0.00138495	0.174274	0.295648	0.963432
ENSMUSG00000034595.18	MGI:1923698	Ppp1r18	protein phosphatase 1, regulatory subunit 18	1.17162	0.000293772	0.00887119	0.0858306	0.793332	0.998747
ENSMUSG00000034708.13	MGI:95832	Grn	granulin	1.75136	2.16748e-06	0.000216885	0.0712609	0.847338	0.998747
ENSMUSG00000034792.9	MGI:95770	Gna15	guanine nucleotide binding protein, alpha 15	1.63877	9.26333e-06	0.000659945	0.325213	0.400679	0.993554
ENSMUSG00000034855.14	MGI:1352450	Cxcl10	chemokine (C-X-C motif) ligand 10	4.38979	1.60626e-08	5.70327e-06	1.50751	0.0696047	0.787763
ENSMUSG00000034947.14	MGI:1922056	Tmem106a	transmembrane protein 106A	2.47787	1.5857e-06	0.00017281	0.563153	0.291864	0.963432
ENSMUSG00000034957.11	MGI:99480	Cebpa	CCAAT/enhancer binding protein (C/EBP), alpha	0.967038	0.000207699	0.00671407	0.351108	0.181756	0.91932
ENSMUSG00000034997.6	MGI:109521	Htr2a	5-hydroxytryptamine (serotonin) receptor 2A	1.47106	0.000203616	0.00660148	-0.165571	0.677003	0.998747
ENSMUSG00000035004.4	MGI:1891393	Igsf6	immunoglobulin superfamily, member 6	2.4114	2.49766e-05	0.00131827	0.523349	0.3824	0.993101
ENSMUSG00000035042.3	MGI:98262	Ccl5	chemokine (C-C motif) ligand 5	3.91449	2.12672e-06	0.00021476	3.6853	0.00448136	0.312134
ENSMUSG00000035095.12	MGI:3606565	Fam167a	family with sequence similarity 167, member A	1.7276	4.50467e-05	0.00206509	0.481296	0.266763	0.957528
ENSMUSG00000035208.17	MGI:2672859	Slfn8	schlafen 8	2.97464	2.63249e-09	1.52505e-06	0.940246	0.0743577	0.80069
ENSMUSG00000035273.15	MGI:1343124	Hpse	heparanase	3.12738	5.90431e-07	8.27882e-05	-0.206166	0.752457	0.998747
ENSMUSG00000035279.9	MGI:3606211	Ssc5d	scavenger receptor cysteine rich family, 5 domains	1.25438	0.000189268	0.00627491	0.588979	0.0854255	0.832066
ENSMUSG00000035314.11	MGI:2686926	Gdpd5	glycerophosphodiester phosphodiesterase domain containing 5	0.907307	0.000105684	0.00393658	0.693136	0.00329136	0.261049
ENSMUSG00000035352.4	MGI:108224	Ccl12	chemokine (C-C motif) ligand 12	4.51955	2.41094e-08	7.50792e-06	-0.415289	0.63371	0.998274
ENSMUSG00000035385.6	MGI:98259	Ccl2	chemokine (C-C motif) ligand 2	4.63108	9.18749e-05	0.00351745	0.478249	0.751407	0.998747
ENSMUSG00000035692.8	MGI:1855694	Isg15	ISG15 ubiquitin-like modifier	2.91148	1.36516e-07	2.66907e-05	0.590869	0.29494	0.963432
ENSMUSG00000035697.15	MGI:1917969	Arhgap45	Rho GTPase activating protein 45	1.43002	6.33773e-05	0.0026575	0.528884	0.143361	0.888929
ENSMUSG00000035778.18	MGI:95704	Ggta1	glycoprotein galactosyltransferase alpha 1, 3	1.94946	3.80839e-07	5.78906e-05	0.127762	0.74388	0.998747
ENSMUSG00000035873.9	MGI:2149961	Pawr	PRKC, apoptosis, WT1, regulator	1.03779	0.000116323	0.00428456	-0.0344377	0.902261	0.998747
ENSMUSG00000035929.12	MGI:95933	H2-Q4	histocompatibility 2, Q region locus 4	1.90199	9.16086e-08	2.01667e-05	0.618935	0.0868536	0.832796
ENSMUSG00000036273.16	MGI:1913975	Lrrk2	leucine-rich repeat kinase 2	1.05338	6.11276e-05	0.00258284	0.188999	0.472649	0.998258
ENSMUSG00000036334.13	MGI:1923481	Igsf10	immunoglobulin superfamily, member 10	1.91862	4.63339e-06	0.000376382	0.213138	0.615767	0.998274
ENSMUSG00000036390.9	MGI:107799	Gadd45a	growth arrest and DNA-damage-inducible 45 alpha	1.014	0.000282983	0.00856889	0.865695	0.00205448	0.21612
ENSMUSG00000036466.18	MGI:1920951	Megf11	multiple EGF-like-domains 11	2.29445	6.6012e-05	0.0027367	0.13773	0.810538	0.998747
ENSMUSG00000036523.17	MGI:2149712	Greb1	gene regulated by estrogen in breast cancer protein	2.03928	0.000123527	0.00450967	0.37939	0.491497	0.998258
ENSMUSG00000036570.15	MGI:1889273	Fxyd1	FXYD domain-containing ion transport regulator 1	0.883505	6.39189e-05	0.00267512	0.259311	0.243841	0.952456
ENSMUSG00000036854.15	MGI:2685325	Hspb6	heat shock protein, alpha-crystallin-related, B6	1.55494	2.36644e-05	0.00128059	0.529739	0.156894	0.902701
ENSMUSG00000036887.6	MGI:88223	C1qa	complement component 1, q subcomponent, alpha polypeptide	2.43095	2.5392e-08	7.74763e-06	0.27633	0.527334	0.998258
ENSMUSG00000036896.6	MGI:88225	C1qc	complement component 1, q subcomponent, C chain	2.34444	7.59614e-08	1.77895e-05	0.472952	0.278986	0.96101
ENSMUSG00000036905.9	MGI:88224	C1qb	complement component 1, q subcomponent, beta polypeptide	2.3732	2.9898e-08	8.77567e-06	0.433727	0.311852	0.970065
ENSMUSG00000036908.18	MGI:1859307	Unc93b1	unc-93 homolog B1, TLR signaling regulator	1.54547	1.81199e-05	0.00105527	0.416921	0.250247	0.952727
ENSMUSG00000036995.8	MGI:2684986	Asap3	ArfGAP with SH3 domain, ankyrin repeat and PH domain 3	1.82287	1.97959e-07	3.63157e-05	0.107563	0.762645	0.998747
ENSMUSG00000037280.13	MGI:1891640	Galnt6	polypeptide N-acetylgalactosaminyltransferase 6	1.3341	0.000178673	0.00598678	0.381778	0.287512	0.961307
ENSMUSG00000037321.18	MGI:98483	Tap1	transporter 1, ATP-binding cassette, sub-family B (MDR/TAP)	1.66608	3.24273e-06	0.000289321	0.22675	0.532596	0.998258
ENSMUSG00000037405.9	MGI:96392	Icam1	intercellular adhesion molecule 1	2.2121	1.73439e-06	0.000183562	0.119418	0.800434	0.998747
ENSMUSG00000037411.11	MGI:97608	Serpine1	serine (or cysteine) peptidase inhibitor, clade E, member 1	2.69932	0.000130565	0.00468122	-0.008539	0.991077	0.99936
ENSMUSG00000037469.12	MGI:2142121	Acp7	acid phosphatase 7, tartrate resistant	2.77219	0.000142581	0.00502205	0.284559	0.687701	0.998747
ENSMUSG00000037686.7	MGI:2144822	Aspg	asparaginase	1.58089	1.69104e-05	0.00101179	0.725667	0.0577215	0.757662
ENSMUSG00000037705.14	MGI:109575	Tecta	tectorin alpha	2.02439	0.000275718	0.00839509	0.518974	0.366512	0.990554
ENSMUSG00000037731.6	MGI:2446213	Themis2	thymocyte selection associated family member 2	2.33579	3.09056e-06	0.000281139	0.414385	0.421197	0.993554
ENSMUSG00000037849.9	MGI:3646410	Ifi206	interferon activated gene 206	4.94831	1.32414e-05	0.000838028	1.31138	0.392147	0.993554
ENSMUSG00000037921.16	MGI:2384570	Ddx60	DExD/H box helicase 60	2.02205	4.58881e-05	0.00209051	0.118869	0.816426	0.998747
ENSMUSG00000038147.15	MGI:1336885	Cd84	CD84 antigen	2.3982	3.68806e-07	5.67755e-05	0.317503	0.507477	0.998258
ENSMUSG00000038168.6	MGI:2146663	P3h2	prolyl 3-hydroxylase 2	1.11881	0.000210768	0.00679332	0.0251435	0.93353	0.998747
ENSMUSG00000038224.13	MGI:107173	Serpinf2	serine (or cysteine) peptidase inhibitor, clade F, member 2	3.79322	2.96819e-11	4.35612e-08	0.20734	0.720367	0.998747
ENSMUSG00000038235.5	MGI:1321398	F11r	F11 receptor	1.19993	9.11378e-05	0.00349531	0.238797	0.441115	0.99708
ENSMUSG00000038352.16	MGI:3028577	Arl5c	ADP-ribosylation factor-like 5C	1.49883	2.0943e-05	0.00117784	0.791445	0.0307427	0.655343
ENSMUSG00000038375.16	MGI:1915978	Trp53inp2	transformation related protein 53 inducible nuclear protein 2	0.655761	0.00023178	0.00732051	0.214464	0.22891	0.946313
ENSMUSG00000038507.7	MGI:2143990	Parp12	poly (ADP-ribose) polymerase family, member 12	0.911146	0.000225694	0.00714883	0.102027	0.682435	0.998747
ENSMUSG00000038521.18	MGI:1355312	C1s1	complement component 1, s subcomponent 1	2.12377	2.58379e-06	0.000247302	0.233651	0.610633	0.998274
ENSMUSG00000038642.11	MGI:107341	Ctss	cathepsin S	2.40996	1.81571e-09	1.19658e-06	0.543037	0.175902	0.914334
ENSMUSG00000038843.19	MGI:95676	Gcnt1	glucosaminyl (N-acetyl) transferase 1, core 2	1.49418	5.82063e-05	0.00248807	0.00939726	0.980195	0.998747
ENSMUSG00000039005.14	MGI:96824	Tlr4	toll-like receptor 4	1.4703	8.95352e-05	0.00345795	0.2455	0.52927	0.998258
ENSMUSG00000039013.17	MGI:2681107	Siglecf	sialic acid binding Ig-like lectin F	1.86798	2.23338e-05	0.00122914	0.52314	0.278096	0.960327
ENSMUSG00000039236.19	MGI:1928895	Isg20	interferon-stimulated protein	2.22539	4.45793e-05	0.00206024	0.314614	0.580725	0.998274
ENSMUSG00000039252.12	MGI:2180196	Lgi2	leucine-rich repeat LGI family, member 2	3.01352	4.76135e-07	6.85074e-05	-0.286057	0.632871	0.998274
ENSMUSG00000039323.19	MGI:96437	Igfbp2	insulin-like growth factor binding protein 2	2.10289	0.0002185	0.00700155	-0.0912028	0.873	0.998747
ENSMUSG00000039853.19	MGI:1921985	Trim14	tripartite motif-containing 14	2.45592	1.10958e-05	0.000735732	0.959503	0.123624	0.874839
ENSMUSG00000039899.6	MGI:103266	Fgl2	fibrinogen-like protein 2	2.72953	4.3593e-07	6.52827e-05	0.348676	0.520076	0.998258
ENSMUSG00000039934.13	MGI:2442259	Gsap	gamma-secretase activating protein	0.730024	0.00030497	0.00917161	-0.0601327	0.767107	0.998747
ENSMUSG00000039942.16	MGI:104311	Ptger4	prostaglandin E receptor 4 (subtype EP4)	2.87284	4.67463e-07	6.81505e-05	-0.0745918	0.897943	0.998747
ENSMUSG00000040061.18	MGI:107465	Plcb2	phospholipase C, beta 2	1.51742	8.16407e-05	0.0032151	0.249214	0.526858	0.998258
ENSMUSG00000040152.9	MGI:98737	Thbs1	thrombospondin 1	3.71535	9.20501e-07	0.00011669	0.1932	0.801565	0.998747
ENSMUSG00000040229.12	MGI:1346334	Gpr34	G protein-coupled receptor 34	1.38416	7.77039e-06	0.000575951	-0.0230458	0.941025	0.998747
ENSMUSG00000040253.16	MGI:2444421	Gbp7	guanylate binding protein 7	1.2387	9.96916e-06	0.000695525	0.199962	0.482937	0.998258
ENSMUSG00000040296.16	MGI:2442858	Ddx58	DEAD/H box helicase 58	1.30739	2.67967e-05	0.00139787	0.387816	0.217549	0.93846
ENSMUSG00000040345.11	MGI:2143764	Arhgap9	Rho GTPase activating protein 9	1.71274	0.000271315	0.00830969	0.289618	0.575454	0.998258
ENSMUSG00000040428.20	MGI:1916467	Plekha4	pleckstrin homology domain containing, family A (phosphoinositide binding specific) member 4	2.55066	3.47219e-08	9.67555e-06	0.0158713	0.97307	0.998747
ENSMUSG00000040483.16	MGI:3772572	Xaf1	XIAP associated factor 1	1.74465	1.91991e-06	0.0001975	0.649798	0.0796562	0.820321
ENSMUSG00000040528.16	MGI:2685731	Milr1	mast cell immunoglobulin like receptor 1	3.38412	1.89706e-06	0.000196065	0.2132	0.797609	0.998747
ENSMUSG00000040552.9	MGI:1097680	C3ar1	complement component 3a receptor 1	2.55065	5.3803e-07	7.59243e-05	0.136852	0.792245	0.998747
ENSMUSG00000040564.15	MGI:88053	Apoc1	apolipoprotein C-I	2.7567	6.13352e-05	0.00258665	-0.864812	0.234536	0.951555
ENSMUSG00000040613.15	MGI:103298	Apobec1	apolipoprotein B mRNA editing enzyme, catalytic polypeptide 1	2.04521	1.94342e-05	0.00111124	0.364112	0.462543	0.998258
ENSMUSG00000040690.16	MGI:1095396	Col16a1	collagen, type XVI, alpha 1	1.69327	6.99414e-05	0.00286188	0.353901	0.407735	0.993554
ENSMUSG00000040723.15	MGI:2676394	Rcsd1	RCSD domain containing 1	1.12692	0.000132065	0.00472208	0.091866	0.759123	0.998747
ENSMUSG00000040747.10	MGI:88341	Cd53	CD53 antigen	1.98775	3.31278e-07	5.2091e-05	0.193036	0.62342	0.998274
ENSMUSG00000040751.13	MGI:1926479	Lat2	linker for activation of T cells family, member 2	2.06914	2.7884e-07	4.58088e-05	0.468634	0.263766	0.956091
ENSMUSG00000040829.15	MGI:3603821	Zmynd15	zinc finger, MYND-type containing 15	2.26077	5.2809e-05	0.00230206	0.907929	0.0962449	0.844887
ENSMUSG00000041193.16	MGI:101899	Pla2g5	phospholipase A2, group V	2.09415	3.85343e-05	0.00183613	0.628371	0.26217	0.955211
ENSMUSG00000041380.14	MGI:96281	Htr2c	5-hydroxytryptamine (serotonin) receptor 2C	3.1207	0.000139852	0.00494067	-0.887044	0.278608	0.96096
ENSMUSG00000041449.17	MGI:2182839	Serpina3h	serine (or cysteine) peptidase inhibitor, clade A, member 3H	2.68192	4.57395e-08	1.1987e-05	0.780118	0.130223	0.876549
ENSMUSG00000041481.18	MGI:105046	Serpina3g	serine (or cysteine) peptidase inhibitor, clade A, member 3G	2.42365	5.83819e-06	0.000452542	0.239461	0.657202	0.998274
ENSMUSG00000041482.18	MGI:1918781	Piezo2	piezo-type mechanosensitive ion channel component 2	3.37767	3.47407e-07	5.42398e-05	0.25257	0.699063	0.998747
ENSMUSG00000041515.11	MGI:96395	Irf8	interferon regulatory factor 8	2.21568	1.60401e-08	5.70327e-06	0.499605	0.210696	0.935159
ENSMUSG00000041538.17	MGI:95925	H2-Ob	histocompatibility 2, O region beta locus	1.96246	2.49232e-05	0.00131827	0.320453	0.52195	0.998258
ENSMUSG00000041559.8	MGI:1328364	Fmod	fibromodulin	2.59285	3.03765e-05	0.00153023	0.345282	0.581634	0.998274
ENSMUSG00000041736.8	MGI:88222	Tspo	translocator protein	1.66994	2.15049e-05	0.0011985	0.35805	0.371522	0.991229
ENSMUSG00000041797.8	MGI:2386796	Abca9	ATP-binding cassette, sub-family A (ABC1), member 9	0.99719	0.000234795	0.00738117	0.0699406	0.797987	0.998747
ENSMUSG00000041827.16	MGI:2180849	Oasl1	2'-5' oligoadenylate synthetase-like 1	3.08658	7.31315e-06	0.000545734	-0.0798344	0.916516	0.998747
ENSMUSG00000041842.16	MGI:2684972	Fhdc1	FH2 domain containing 1	1.35086	4.98062e-05	0.00221128	0.45288	0.178958	0.917136
ENSMUSG00000041959.15	MGI:1339468	S100a10	S100 calcium binding protein A10 (calpactin)	1.33309	1.77235e-05	0.00104044	0.0666805	0.830677	0.998747
ENSMUSG00000042129.9	MGI:2386853	Rassf4	Ras association (RalGDS/AF-6) domain family member 4	1.6341	1.09495e-05	0.000730433	0.211896	0.574309	0.998258
ENSMUSG00000042190.13	MGI:109603	Cmklr1	chemokine-like receptor 1	1.36157	0.000148434	0.00519494	0.285451	0.434645	0.994775
ENSMUSG00000042228.15	MGI:96892	Lyn	LYN proto-oncogene, Src family tyrosine kinase	1.52092	2.43258e-05	0.00130612	0.0653624	0.857261	0.998747
ENSMUSG00000042613.10	MGI:2441670	Pbxip1	pre B cell leukemia transcription factor interacting protein 1	0.94044	8.08649e-05	0.00319025	0.0155546	0.94812	0.998747
ENSMUSG00000042622.15	MGI:96910	Maff	v-maf musculoaponeurotic fibrosarcoma oncogene family, protein F (avian)	2.50819	6.66878e-05	0.00275333	-0.487791	0.486908	0.998258
ENSMUSG00000042677.8	MGI:2385891	Zc3h12a	zinc finger CCCH type containing 12A	1.65019	0.000166392	0.00568781	0.375664	0.409256	0.993554
ENSMUSG00000042707.7	MGI:1922813	Dnali1	dynein, axonemal, light intermediate polypeptide 1	2.40167	0.000242971	0.00756602	1.55648	0.0236999	0.605497
ENSMUSG00000043008.10	MGI:2686922	Klhl6	kelch-like 6	2.04304	5.75063e-06	0.00044733	0.499455	0.285672	0.961307
ENSMUSG00000043157.9	MGI:2444054	Arl11	ADP-ribosylation factor-like 11	2.37452	1.24555e-05	0.000794767	0.725215	0.213256	0.93735
ENSMUSG00000043263.14	MGI:2138243	Ifi209	interferon activated gene 209	3.81369	9.46703e-07	0.000117744	1.07329	0.226887	0.945978
ENSMUSG00000043531.17	MGI:1929666	Sorcs1	sortilin-related VPS10 domain containing receptor 1	1.5308	8.39663e-06	0.000610044	1.00634	0.00344085	0.26678
ENSMUSG00000043740.16	MGI:2443478	B430306N03Rik	RIKEN cDNA B430306N03 gene	3.89562	4.62745e-06	0.000376382	-0.997439	0.352164	0.982751
ENSMUSG00000044350.15	MGI:2445077	Lacc1	laccase domain containing 1	0.842644	0.000163499	0.00560635	0.525118	0.020487	0.570297
ENSMUSG00000044468.15	MGI:1921895	Tent5c	terminal nucleotidyltransferase 5C	2.63375	1.91018e-08	6.16636e-06	0.412567	0.388645	0.993554
ENSMUSG00000044583.14	MGI:2176882	Tlr7	toll-like receptor 7	1.91116	1.64517e-06	0.000176647	0.0273151	0.946313	0.998747
ENSMUSG00000044626.14	MGI:2388029	Liph	lipase, member H	1.47175	0.000223216	0.00711331	1.16495	0.00576337	0.353688
ENSMUSG00000044703.6	MGI:1918441	Phf11a	PHD finger protein 11A	4.12126	7.61131e-07	0.000102168	0.448806	0.595945	0.998274
ENSMUSG00000044708.6	MGI:1194504	Kcnj10	potassium inwardly-rectifying channel, subfamily J, member 10	0.644303	0.000243311	0.00756602	0.150981	0.390192	0.993554
ENSMUSG00000044811.14	MGI:2153249	Cd300c2	CD300C molecule 2	1.82547	1.15101e-05	0.000754116	0.43256	0.31179	0.970065
ENSMUSG00000044827.11	MGI:1341295	Tlr1	toll-like receptor 1	2.05361	3.75735e-06	0.000325647	0.465545	0.339253	0.980146
ENSMUSG00000045094.9	MGI:3045339	Arhgef37	Rho guanine nucleotide exchange factor (GEF) 37	2.40807	1.45272e-05	0.000895801	0.148747	0.792687	0.998747
ENSMUSG00000045102.13	MGI:2675617	Poln	DNA polymerase N	1.71862	4.64081e-05	0.0020978	-0.00496258	0.990826	0.99936
ENSMUSG00000045314.6	MGI:1925338	Sowahb	sosondowah ankyrin repeat domain family member B	4.31841	4.00687e-08	1.0757e-05	-0.710539	0.375736	0.991229
ENSMUSG00000045502.7	MGI:1933383	Hcar2	hydroxycarboxylic acid receptor 2	5.62303	2.1524e-11	4.30753e-08	2.06076	0.0732057	0.797126
ENSMUSG00000045573.10	MGI:104629	Penk	preproenkephalin	2.53984	9.61505e-05	0.00363132	0.710694	0.275426	0.958866
ENSMUSG00000045868.13	MGI:1921808	Gvin1	GTPase, very large interferon inducible 1	1.31762	0.000198589	0.00648624	0.137156	0.702286	0.998747
ENSMUSG00000045932.13	MGI:99449	Ifit2	interferon-induced protein with tetratricopeptide repeats 2	1.6582	1.82114e-06	0.000191664	-0.0185557	0.957836	0.998747
ENSMUSG00000046167.6	MGI:2388361	Gldn	gliomedin	1.90842	4.91263e-06	0.000396141	0.614468	0.146224	0.893328
ENSMUSG00000046223.11	MGI:97612	Plaur	plasminogen activator, urokinase receptor	2.49867	1.02986e-05	0.00070848	-0.363786	0.554316	0.998258
ENSMUSG00000046245.14	MGI:2450529	Pilra	paired immunoglobin-like type 2 receptor alpha	2.55577	1.49671e-05	0.000917788	0.10479	0.874566	0.998747
ENSMUSG00000046410.11	MGI:1891291	Kcnk6	potassium inwardly-rectifying channel, subfamily K, member 6	1.52021	1.13163e-05	0.000743631	0.246874	0.487716	0.998258
ENSMUSG00000046718.9	MGI:1916800	Bst2	bone marrow stromal cell antigen 2	2.65729	2.42147e-08	7.50792e-06	0.826546	0.0874891	0.833085
ENSMUSG00000046805.11	MGI:1333743	Mpeg1	macrophage expressed gene 1	2.74368	1.70306e-09	1.1716e-06	0.474426	0.298522	0.963484
ENSMUSG00000046879.8	MGI:107567	Irgm1	immunity-related GTPase family M member 1	1.77936	4.69148e-08	1.21504e-05	0.173439	0.597907	0.998274
ENSMUSG00000046993.7	MGI:3648120	Gm5637	predicted pseudogene 5637	1.92504	0.000224188	0.0071319	0.491255	0.376115	0.991229
ENSMUSG00000047180.9	MGI:2429944	Neurl3	neuralized E3 ubiquitin protein ligase 3	1.75173	0.000308451	0.00923842	0.296843	0.558027	0.998258
ENSMUSG00000047369.18	MGI:2444525	Dnah14	dynein, axonemal, heavy chain 14	2.09826	0.000170475	0.00579097	-0.532933	0.361214	0.987205
ENSMUSG00000047407.18	MGI:1194497	Tgif1	TGFB-induced factor homeobox 1	2.09209	3.21892e-05	0.00159597	-0.142811	0.786057	0.998747
ENSMUSG00000047606.5	MGI:2685617	Ankrd34c	ankyrin repeat domain 34C	2.74884	6.66439e-05	0.00275333	-0.720362	0.304516	0.96648
ENSMUSG00000047735.15	MGI:1343184	Samd9l	sterile alpha motif domain containing 9-like	1.67763	2.65232e-06	0.00024846	0.149055	0.678429	0.998747
ENSMUSG00000047798.16	MGI:2442359	Cd300lf	CD300 molecule like family member F	4.19019	2.56893e-06	0.000246953	0.69094	0.488468	0.998258
ENSMUSG00000048100.14	MGI:1913500	Taf13	TATA-box binding protein associated factor 13	0.710096	7.70704e-05	0.00308478	0.133476	0.459637	0.998258
ENSMUSG00000048163.14	MGI:106689	Selplg	selectin, platelet (p-selectin) ligand	0.973366	0.000215494	0.00691529	0.239206	0.36549	0.98985
ENSMUSG00000048277.16	MGI:1328324	Syngr2	synaptogyrin 2	1.25589	4.66562e-05	0.00210241	0.0646507	0.836396	0.998747
ENSMUSG00000048721.3	MGI:2443410	Fndc9	fibronectin type III domain containing 9	2.68912	0.000172864	0.00582761	0.353458	0.596492	0.998274
ENSMUSG00000048747.15	MGI:2442873	E130114P18Rik	RIKEN cDNA E130114P18 gene	0.677691	0.000109807	0.00406269	-0.277668	0.124527	0.874839
ENSMUSG00000048776.9	MGI:97800	Pthlh	parathyroid hormone-like peptide	2.53221	5.68754e-05	0.00245021	-0.593397	0.369233	0.991229
ENSMUSG00000048779.6	MGI:2673874	P2ry6	pyrimidinergic receptor P2Y, G-protein coupled, 6	1.73554	6.7449e-06	0.000512008	0.395682	0.318554	0.972399
ENSMUSG00000048865.17	MGI:2684948	Arhgap30	Rho GTPase activating protein 30	1.40733	0.000175568	0.0058917	0.243876	0.524088	0.998258
ENSMUSG00000049502.18	MGI:2656973	Dtx3l	deltex 3-like, E3 ubiquitin ligase	1.04579	7.05917e-05	0.00287247	0.277134	0.297576	0.963441
ENSMUSG00000049625.7	MGI:2385852	Tifab	TRAF-interacting protein with forkhead-associated domain, family member B	1.33707	7.88495e-05	0.00314414	0.365999	0.292099	0.963432
ENSMUSG00000049871.15	MGI:2444070	Nlrc3	NLR family, CARD domain containing 3	2.2139	1.43673e-05	0.000888433	0.201883	0.68738	0.998747
ENSMUSG00000050063.19	MGI:1343166	Klk6	kallikrein related-peptidase 6	4.6085	3.74075e-09	1.9114e-06	1.77425	0.0366072	0.677099
ENSMUSG00000050069.4	MGI:1344367	Grem2	gremlin 2, DAN family BMP antagonist	1.29938	0.000310299	0.00926854	0.0605939	0.866489	0.998747
ENSMUSG00000050335.18	MGI:96778	Lgals3	lectin, galactose binding, soluble 3	3.17172	3.35194e-06	0.000297539	1.30391	0.0620066	0.770326
ENSMUSG00000050370.6	MGI:1333869	Ch25h	cholesterol 25-hydroxylase	4.51131	1.10662e-07	2.29821e-05	-0.167467	0.861657	0.998747
ENSMUSG00000050493.9	MGI:2668032	Fam167b	family with sequence similarity 167, member B	2.16359	0.000187006	0.00622181	-0.0355284	0.955183	0.998747
ENSMUSG00000050711.8	MGI:103033	Scg2	secretogranin II	1.67653	1.76886e-05	0.00104044	0.0163795	0.966558	0.998747
ENSMUSG00000050732.10	MGI:1336882	Vamp8	vesicle-associated membrane protein 8	1.08269	0.000105967	0.00394046	-0.0508186	0.857599	0.998747
ENSMUSG00000051048.18	MGI:2444049	P4ha3	procollagen-proline, 2-oxoglutarate 4-dioxygenase (proline 4-hydroxylase), alpha polypeptide III	2.49254	7.96215e-10	6.64327e-07	0.909193	0.0288943	0.644292
ENSMUSG00000051212.9	MGI:2442034	Gpr183	G protein-coupled receptor 183	1.71137	9.98391e-06	0.000695525	-0.0835848	0.836942	0.998747
ENSMUSG00000051439.8	MGI:88318	Cd14	CD14 antigen	1.82578	2.90485e-06	0.000268687	0.374238	0.35894	0.986811
ENSMUSG00000051456.5	MGI:1928479	Hspb3	heat shock protein 3	2.36203	0.000185372	0.00618299	0.222835	0.754454	0.998747
ENSMUSG00000051498.8	MGI:1341296	Tlr6	toll-like receptor 6	1.55433	0.000276418	0.0084048	-0.219905	0.637402	0.998274
ENSMUSG00000051504.19	MGI:2443256	Siglech	sialic acid binding Ig-like lectin H	1.06659	0.00016394	0.00561272	0.129519	0.649062	0.998274
ENSMUSG00000051506.18	MGI:3584510	Wdfy4	WD repeat and FYVE domain containing 4	1.91057	3.4653e-06	0.000305141	0.208933	0.619156	0.998274
ENSMUSG00000051652.5	MGI:2447899	Lrrc3	leucine rich repeat containing 3	1.19619	0.000104418	0.00390266	0.372734	0.232691	0.950464
ENSMUSG00000052085.8	MGI:1921396	Dock8	dedicator of cytokinesis 8	1.50773	1.22435e-05	0.000785799	0.325693	0.349704	0.982695
ENSMUSG00000052142.16	MGI:2444128	Rasal3	RAS protein activator like 3	1.80314	2.6926e-06	0.000251165	0.357654	0.362142	0.98754
ENSMUSG00000052160.8	MGI:2144765	Pld4	phospholipase D family, member 4	1.67537	3.88427e-06	0.000334017	0.426311	0.244066	0.952456
ENSMUSG00000052336.8	MGI:1333815	Cx3cr1	chemokine (C-X3-C motif) receptor 1	1.35498	2.71576e-05	0.00141264	0.0798516	0.804996	0.998747
ENSMUSG00000052688.13	MGI:2442295	Rab7b	RAB7B, member RAS oncogene family	1.82307	0.000172799	0.00582761	0.0547283	0.913402	0.998747
ENSMUSG00000052776.11	MGI:2180860	Oas1a	2'-5' oligoadenylate synthetase 1A	3.39223	3.48798e-10	4.04128e-07	0.721002	0.215655	0.937925
ENSMUSG00000053113.4	MGI:1201791	Socs3	suppressor of cytokine signaling 3	3.75437	1.0234e-07	2.16627e-05	0.21003	0.768823	0.998747
ENSMUSG00000053158.11	MGI:95514	Fes	feline sarcoma oncogene	1.54389	1.95532e-05	0.00111226	0.162134	0.661306	0.998747
ENSMUSG00000053175.18	MGI:88140	Bcl3	B cell leukemia/lymphoma 3	3.62421	3.09346e-07	4.89923e-05	1.04573	0.176262	0.914674
ENSMUSG00000053318.8	MGI:1921998	Slamf8	SLAM family member 8	2.09581	0.000271403	0.00830969	0.328957	0.643026	0.998274
ENSMUSG00000053626.6	MGI:106923	Tll1	tolloid-like	2.56098	3.00113e-05	0.0015153	0.0724212	0.906424	0.998747
ENSMUSG00000053931.12	MGI:1919244	Cnn3	calponin 3, acidic	1.04691	4.52154e-05	0.00206509	0.0281208	0.912875	0.998747
ENSMUSG00000054203.8	MGI:101847	Ifi205	interferon activated gene 205	2.70457	5.85262e-05	0.00249689	0.0177345	0.978823	0.998747
ENSMUSG00000054404.14	MGI:1329004	Slfn5	schlafen 5	1.39726	0.000121331	0.00444423	-0.0116594	0.974553	0.998747
ENSMUSG00000054520.16	MGI:1346349	Sh3bp2	SH3-domain binding protein 2	1.53363	1.72301e-05	0.00102792	0.568979	0.114675	0.869128
ENSMUSG00000054626.12	MGI:98976	Xlr	X-linked lymphocyte-regulated	1.9937	1.32008e-06	0.000148266	-0.00423323	0.99239	0.999538
ENSMUSG00000055172.11	MGI:1355313	C1ra	complement component 1, r subcomponent A	1.8418	0.000167655	0.00571324	-0.105991	0.82961	0.998747
ENSMUSG00000055413.13	MGI:95934	H2-Q5	histocompatibility 2, Q region locus 5	2.15194	1.83638e-05	0.00106665	0.769417	0.149583	0.897802
ENSMUSG00000055541.19	MGI:105492	Lair1	leukocyte-associated Ig-like receptor 1	1.60845	2.62031e-06	0.000247737	0.261558	0.448471	0.997396
ENSMUSG00000056025.13	MGI:1316732	Clca3a1	chloride channel accessory 3A1	4.6652	3.87479e-05	0.00184232	-0.408559	0.712956	0.998747
ENSMUSG00000056144.15	MGI:2137359	Trim34a	tripartite motif-containing 34A	1.48908	1.43392e-05	0.000888433	0.134579	0.704217	0.998747
ENSMUSG00000056708.6	MGI:1337072	Ier5	immediate early response 5	0.845646	0.000306366	0.00918847	0.832716	0.000390023	0.08964
ENSMUSG00000056737.15	MGI:1098259	Capg	capping protein (actin filament), gelsolin-like	2.1565	4.27281e-06	0.000354949	0.417284	0.388517	0.993554
ENSMUSG00000056880.14	MGI:1920998	Gadl1	glutamate decarboxylase-like 1	2.7757	1.52959e-07	2.92803e-05	0.657906	0.257508	0.955211
ENSMUSG00000057143.16	MGI:4821183	Trim12c	tripartite motif-containing 12C	1.21145	2.17642e-05	0.00120255	0.209876	0.472286	0.998258
ENSMUSG00000057191.15	MGI:3043001	AB124611	cDNA sequence AB124611	2.99183	3.83825e-05	0.00183613	0.849456	0.362406	0.98754
ENSMUSG00000057596.14	MGI:3035181	Trim30d	tripartite motif-containing 30D	2.32878	4.27353e-08	1.13346e-05	0.40961	0.349565	0.982695
ENSMUSG00000058056.17	MGI:1919583	Palld	palladin, cytoskeletal associated protein	1.19798	0.000155108	0.00539423	-0.0876414	0.783866	0.998747
ENSMUSG00000058099.17	MGI:1921289	Nfam1	Nfat activating molecule with ITAM motif 1	1.46353	8.63297e-05	0.00336365	0.0615613	0.870533	0.998747
ENSMUSG00000058163.15	MGI:3645205	Gm5431	predicted gene 5431	2.30984	5.11086e-06	0.000409129	0.303541	0.569923	0.998258
ENSMUSG00000058715.12	MGI:95496	Fcer1g	Fc receptor, IgE, high affinity I, gamma polypeptide	2.28459	7.51367e-08	1.77895e-05	0.147851	0.7302	0.998747
ENSMUSG00000059089.5	MGI:2179523	Fcgr4	Fc receptor, IgG, low affinity IV	3.83751	8.98931e-08	2.01667e-05	2.41014	0.0064599	0.364729
ENSMUSG00000059336.15	MGI:1351654	Slc14a1	solute carrier family 14 (urea transporter), member 1	1.07995	3.09811e-05	0.00154913	0.178639	0.492526	0.998258
ENSMUSG00000059498.14	MGI:95500	Fcgr3	Fc receptor, IgG, low affinity III	2.04701	2.32224e-07	3.99389e-05	0.286774	0.471561	0.998258
ENSMUSG00000060090.17	MGI:1277953	Rp2	retinitis pigmentosa 2 homolog	0.629978	0.00022328	0.00711331	-0.126322	0.462039	0.998258
ENSMUSG00000060441.16	MGI:3646853	Trim5	tripartite motif-containing 5	1.64059	8.0303e-07	0.000105856	0.0540219	0.875362	0.998747
ENSMUSG00000060519.12	MGI:1353652	Tor3a	torsin family 3, member A	1.42856	2.95724e-06	0.000271253	0.112464	0.716989	0.998747
ENSMUSG00000060550.17	MGI:95936	H2-Q7	histocompatibility 2, Q region locus 7	2.37493	4.39941e-06	0.000361375	1.17373	0.0299345	0.653858
ENSMUSG00000060791.16	MGI:1927135	Gmfg	glia maturation factor, gamma	1.70428	3.89329e-05	0.00184713	0.162841	0.704683	0.998747
ENSMUSG00000060802.9	MGI:88127	B2m	beta-2 microglobulin	1.96848	8.65944e-09	3.66594e-06	0.32918	0.336512	0.979744
ENSMUSG00000061132.14	MGI:96878	Blnk	B cell linker	1.09856	5.8865e-05	0.00250649	1.04188	0.000164356	0.0552635
ENSMUSG00000061232.17	MGI:95904	H2-K1	histocompatibility 2, K1, K region	2.07318	8.89422e-08	2.01667e-05	0.658612	0.0905316	0.835254
ENSMUSG00000062082.17	MGI:3036289	Cd200r4	CD200 receptor 4	3.71836	0.000296964	0.00894305	1.68874	0.257765	0.955211
ENSMUSG00000062488.10	MGI:3698419	Ifit3b	interferon-induced protein with tetratricopeptide repeats 3B	2.32872	3.61586e-08	9.94993e-06	0.523224	0.219561	0.940291
ENSMUSG00000062585.12	MGI:104650	Cnr2	cannabinoid receptor 2 (macrophage)	2.69423	1.04293e-05	0.00071081	0.118559	0.86737	0.998747
ENSMUSG00000062593.18	MGI:6121530	Gm49339	predicted gene, 49339	3.44898	1.36226e-05	0.000851957	-0.673569	0.472131	0.998258
ENSMUSG00000063234.6	MGI:1934129	Gpr84	G protein-coupled receptor 84	2.40941	6.16545e-06	0.000474567	0.658386	0.242483	0.952456
ENSMUSG00000063286.8	MGI:3644223	Gvin-ps7	GTPase, very large interferon inducible, pseudogene 7	2.02514	6.32352e-07	8.8105e-05	0.22078	0.594675	0.998274
ENSMUSG00000063354.8	MGI:1919277	Slc39a4	solute carrier family 39 (zinc transporter), member 4	2.27795	0.000160596	0.00553265	0.830957	0.302991	0.96648
ENSMUSG00000063458.14	MGI:1923883	Lrmda	leucine rich melanocyte differentiation associated	2.29516	1.06285e-06	0.000126473	-0.211028	0.654716	0.998274
ENSMUSG00000064215.14	MGI:1277180	Ifi27	interferon, alpha-inducible protein 27	0.946605	0.000128465	0.00462854	0.0765594	0.757447	0.998747
ENSMUSG00000064246.11	MGI:1340899	Chil1	chitinase-like 1	1.56195	9.58268e-07	0.000118513	0.291824	0.364732	0.989399
ENSMUSG00000064267.14	MGI:1921346	Hvcn1	hydrogen voltage-gated channel 1	2.15891	3.09213e-08	8.9566e-06	0.475915	0.235004	0.951718
ENSMUSG00000066363.13	MGI:2182838	Serpina3f	serine (or cysteine) peptidase inhibitor, clade A, member 3F	2.53252	2.08629e-07	3.79567e-05	0.658007	0.190322	0.926213
ENSMUSG00000066364.3	MGI:2182835	Serpina3b	serine (or cysteine) peptidase inhibitor, clade A, member 3B	2.28684	2.74231e-05	0.00142045	0.740155	0.211121	0.935159
ENSMUSG00000066861.15	MGI:97429	Oas1g	2'-5' oligoadenylate synthetase 1G	3.85863	3.90869e-09	1.91213e-06	0.902131	0.192834	0.928387
ENSMUSG00000067212.9	MGI:95957	H2-T23	histocompatibility 2, T region locus 23	1.84684	5.02992e-07	7.14378e-05	0.467839	0.208085	0.935159
ENSMUSG00000067235.15	MGI:95929	H2-Q10	histocompatibility 2, Q region locus 10	1.98336	1.33852e-05	0.000841804	0.560835	0.238253	0.952456
ENSMUSG00000067586.5	MGI:1339365	S1pr3	sphingosine-1-phosphate receptor 3	3.00839	6.36509e-10	6.00007e-07	-0.110579	0.821353	0.998747
ENSMUSG00000068129.6	MGI:1298217	Cst7	cystatin F (leukocystatin)	5.13762	4.40763e-14	3.23432e-10	1.41332	0.10917	0.866062
ENSMUSG00000068245.15	MGI:1277133	Phf11d	PHD finger protein 11D	3.31272	3.30478e-08	9.32712e-06	0.801058	0.200603	0.932732
ENSMUSG00000068335.7	MGI:893587	Dok1	docking protein 1	2.06988	1.46983e-05	0.000903825	0.131051	0.789135	0.998747
ENSMUSG00000068699.13	MGI:95557	Flnc	filamin C, gamma	3.54298	6.54155e-10	6.00007e-07	1.50657	0.0103265	0.43728
ENSMUSG00000069515.7	MGI:96902	Lyz1	lysozyme 1	3.77564	1.63596e-08	5.71651e-06	0.420236	0.542294	0.998258
ENSMUSG00000069516.9	MGI:96897	Lyz2	lysozyme 2	3.65317	1.83886e-08	6.13342e-06	0.546623	0.401937	0.993554
ENSMUSG00000069763.4	MGI:1915138	Tmem100	transmembrane protein 100	1.17625	6.43424e-05	0.00268664	-0.222543	0.451543	0.998258
ENSMUSG00000069792.6	MGI:3649773	Wfdc17	WAP four-disulfide core domain 17	4.19781	0.000109101	0.00404334	-0.597341	0.579154	0.998274
ENSMUSG00000069793.13	MGI:2445121	Slfn9	schlafen 9	2.73774	8.30571e-08	1.9046e-05	0.538837	0.31508	0.972146
ENSMUSG00000069874.8	MGI:1926262	Irgm2	immunity-related GTPase family M member 2	1.30254	3.44394e-05	0.00166993	0.0145522	0.963579	0.998747
ENSMUSG00000069892.10	MGI:3711310	9930111J21Rik2	RIKEN cDNA 9930111J21 gene 2	1.36249	5.17422e-05	0.00226003	0.223859	0.512533	0.998258
ENSMUSG00000069893.11	MGI:3041173	9930111J21Rik1	RIKEN cDNA 9930111J21 gene 1	1.38368	7.0522e-05	0.00287247	0.288856	0.418204	0.993554
ENSMUSG00000070031.12	MGI:3702467	Sp140	Sp140 nuclear body protein	1.95275	0.00024735	0.00766924	0.305927	0.598911	0.998274
ENSMUSG00000070034.14	MGI:1923364	Sp110	Sp110 nuclear body protein	2.04741	5.64476e-06	0.00044222	0.397822	0.400428	0.993554
ENSMUSG00000070327.15	MGI:1289196	Rnf213	ring finger protein 213	1.61975	2.96868e-05	0.00150582	0.185995	0.632638	0.998274
ENSMUSG00000070354.14	MGI:5439444	Evi2	ecotropic viral integration site 2	1.46407	4.98225e-05	0.00221128	0.325331	0.38054	0.992766
ENSMUSG00000070366.6	MGI:2685936	Plpp4	phospholipid phosphatase 4	1.19713	2.30228e-06	0.000225255	0.630768	0.0133326	0.491488
ENSMUSG00000070469.13	MGI:3028499	Adamtsl3	ADAMTS-like 3	1.81058	2.94159e-06	0.000270946	0.78267	0.0513466	0.730957
ENSMUSG00000071042.13	MGI:3028579	Rasgrp3	RAS, guanyl releasing protein 3	1.20015	3.67213e-06	0.000320752	0.189702	0.46771	0.998258
ENSMUSG00000071068.8	MGI:2147038	Treml2	triggering receptor expressed on myeloid cells-like 2	4.11877	1.5518e-11	3.41614e-08	1.44177	0.0347791	0.670801
ENSMUSG00000071203.7	MGI:1298220	Naip5	NLR family, apoptosis inhibitory protein 5	2.11257	1.30153e-06	0.000146932	0.305638	0.499876	0.998258
ENSMUSG00000071604.6	MGI:2685813	Fam189a2	family with sequence similarity 189, member A2	0.590886	7.17532e-05	0.00290363	0.0835523	0.586349	0.998274
ENSMUSG00000071713.7	MGI:1339759	Csf2rb	colony stimulating factor 2 receptor, beta, low-affinity (granulocyte-macrophage)	2.25925	3.68631e-06	0.000320752	-0.133514	0.789775	0.998747
ENSMUSG00000071715.13	MGI:109186	Ncf4	neutrophil cytosolic factor 4	2.14899	1.21164e-05	0.000779916	0.856614	0.0993743	0.845909
ENSMUSG00000072082.8	MGI:102551	Ccnf	cyclin F	0.992708	9.69794e-08	2.09304e-05	0.606537	0.00102108	0.142716
ENSMUSG00000072115.12	MGI:88022	Ang	angiogenin, ribonuclease, RNase A family, 5	1.61176	4.83803e-05	0.00216913	0.458876	0.272404	0.957879
ENSMUSG00000072620.4	MGI:1313258	Slfn2	schlafen 2	2.68563	8.88124e-07	0.000114334	0.535448	0.342584	0.980899
ENSMUSG00000073405.7	MGI:2442805	H2-T-ps	histocompatibility 2, T region locus, pseudogene	1.92767	6.66381e-06	0.000507603	0.255925	0.568122	0.998258
ENSMUSG00000073406.11	MGI:892004	H2-Bl	histocompatibility 2, blastocyst	2.69709	2.09736e-05	0.00117784	-0.808628	0.209989	0.935159
ENSMUSG00000073409.13	MGI:95935	H2-Q6	histocompatibility 2, Q region locus 6	2.23373	1.9679e-06	0.000200561	0.97092	0.0469758	0.719341
ENSMUSG00000073411.13	MGI:95896	H2-D1	histocompatibility 2, D region locus 1	2.258	1.28782e-08	4.97368e-06	0.647925	0.103483	0.853613
ENSMUSG00000073418.5	MGI:88228	C4b	complement component 4B (Chido blood group)	2.35885	8.4497e-10	6.64327e-07	0.989151	0.0102426	0.43728
ENSMUSG00000073421.7	MGI:103070	H2-Ab1	histocompatibility 2, class II antigen A, beta 1	2.78827	4.77583e-05	0.00214562	1.11322	0.109953	0.866483
ENSMUSG00000073489.7	MGI:96429	Ifi204	interferon activated gene 204	3.26377	5.49372e-08	1.3901e-05	0.507237	0.421849	0.993554
ENSMUSG00000073490.12	MGI:2138302	Ifi207	interferon activated gene 207	5.12991	1.54291e-10	1.99798e-07	-0.720512	0.3958	0.993554
ENSMUSG00000073491.12	MGI:3695276	Ifi213	interferon activated gene 213	4.96744	1.11943e-07	2.30309e-05	0.380015	0.674762	0.998747
ENSMUSG00000073555.2	MGI:3644953	Gm4951	predicted gene 4951	2.64327	3.2787e-05	0.00160963	0.170665	0.800507	0.998747
ENSMUSG00000073902.6	MGI:3584360	Gvin3	GTPase, very large interferon inducible, family member 3	3.09573	5.00176e-09	2.34274e-06	0.762201	0.163097	0.905138
ENSMUSG00000074151.14	MGI:3612191	Nlrc5	NLR family, CARD domain containing 5	2.94502	2.04284e-09	1.28489e-06	0.631499	0.208378	0.935159
ENSMUSG00000074622.5	MGI:104555	Mafb	v-maf musculoaponeurotic fibrosarcoma oncogene family, protein B (avian)	1.36845	0.000137615	0.00487836	0.254356	0.481915	0.998258
ENSMUSG00000074874.11	MGI:88555	Ctla2b	cytotoxic T lymphocyte-associated protein 2 beta	2.29402	1.74962e-05	0.00103538	0.193987	0.730686	0.998747
ENSMUSG00000074896.4	MGI:1101055	Ifit3	interferon-induced protein with tetratricopeptide repeats 3	2.52895	3.86895e-08	1.0515e-05	0.716752	0.121895	0.874839
ENSMUSG00000075289.6	MGI:2147595	Carns1	carnosine synthase 1	0.823578	3.28302e-05	0.00160963	0.55731	0.00576585	0.353688
ENSMUSG00000078238.5	MGI:3650410	Gm12854	predicted gene 12854	1.87346	0.000331821	0.00980497	0.842406	0.146256	0.893328
ENSMUSG00000078606.9	MGI:3782245	Gvin2	GTPase, very large interferon inducible, family member 2	1.41396	2.11891e-05	0.0011839	0.089012	0.791544	0.998747
ENSMUSG00000078763.3	MGI:1313259	Slfn1	schlafen 1	5.26676	0.000133375	0.00475869	-0.0185532	0.991188	0.99936
ENSMUSG00000078771.11	MGI:95458	Evi2a	ecotropic viral integration site 2a	1.01598	0.00011936	0.00437931	0.240782	0.36524	0.989649
ENSMUSG00000078853.9	MGI:107729	Igtp	interferon gamma induced GTPase	1.6802	3.08855e-07	4.89923e-05	0.102512	0.759434	0.998747
ENSMUSG00000078942.11	MGI:1298222	Naip6	NLR family, apoptosis inhibitory protein 6	2.12496	9.94243e-07	0.000121596	0.486762	0.279828	0.961012
ENSMUSG00000078945.11	MGI:1298226	Naip2	NLR family, apoptosis inhibitory protein 2	2.2795	1.37006e-07	2.66907e-05	0.536798	0.234721	0.951555
ENSMUSG00000079012.12	MGI:98378	Serpina3m	serine (or cysteine) peptidase inhibitor, clade A, member 3M	2.94189	1.84808e-09	1.19658e-06	0.376845	0.447883	0.997308
ENSMUSG00000079013.3	MGI:2182843	Serpina3j	serine (or cysteine) peptidase inhibitor, clade A (alpha-1 antiproteinase, antitrypsin), member 3J	2.58496	7.56508e-08	1.77895e-05	0.969426	0.0524316	0.737686
ENSMUSG00000079014.5	MGI:2182841	Serpina3i	serine (or cysteine) peptidase inhibitor, clade A, member 3I	3.2788	4.19698e-06	0.000351301	0.811465	0.296602	0.963441
ENSMUSG00000079017.4	MGI:1924183	Ifi27l2a	interferon, alpha-inducible protein 27 like 2A	4.49762	3.85329e-10	4.24132e-07	1.44653	0.0660591	0.78153
ENSMUSG00000079227.11	MGI:107182	Ccr5	chemokine (C-C motif) receptor 5	1.2968	0.000272299	0.00832553	0.197485	0.584634	0.998274
ENSMUSG00000079293.12	MGI:1861431	Clec7a	C-type lectin domain family 7, member a	4.24511	1.96977e-14	2.16813e-10	1.09605	0.0879916	0.833107
ENSMUSG00000079362.6	MGI:5663439	Gm43302	predicted gene 43302	1.65916	4.51373e-05	0.00206509	0.609446	0.14742	0.894728
ENSMUSG00000079415.3	MGI:88439	Cntf	ciliary neurotrophic factor	2.1794	2.62066e-07	4.44698e-05	0.260682	0.560696	0.998258
ENSMUSG00000079419.5	MGI:2385644	Ms4a6c	membrane-spanning 4-domains, subfamily A, member 6C	2.74042	5.15748e-06	0.000411365	0.237404	0.709449	0.998747
ENSMUSG00000079492.3	MGI:3779381	Gm11127	predicted gene 11127	1.85102	8.30882e-05	0.00324775	-0.0364063	0.941896	0.998747
ENSMUSG00000079507.11	MGI:95928	H2-Q1	histocompatibility 2, Q region locus 1	2.18854	8.17724e-07	0.000107151	0.590034	0.205246	0.935159
ENSMUSG00000079547.5	MGI:95922	H2-DMb1	histocompatibility 2, class II, locus Mb1	2.07456	2.04462e-06	0.000207421	0.258208	0.57719	0.998274
ENSMUSG00000081660.2	MGI:3702103	Gm11787	predicted gene 11787	1.66947	0.000279277	0.00848002	0.367682	0.437597	0.996537
ENSMUSG00000082292.4	MGI:3649299	Gm12250	predicted gene 12250	5.3539	5.66812e-08	1.41793e-05	0.441423	0.552193	0.998258
ENSMUSG00000085025.2	MGI:3650277	Gm13715	predicted gene 13715	6.01389	6.69213e-08	1.6369e-05	1.80333	0.0665622	0.781959
ENSMUSG00000085129.2	MGI:2442533	5031425F14Rik	RIKEN cDNA 5031425F14 gene	3.1554	4.90577e-05	0.00219058	1.52888	0.0575651	0.757662
ENSMUSG00000085795.9	MGI:2662729	Zfp703	zinc finger protein 703	1.1339	0.000179554	0.00600714	0.622233	0.0409826	0.690938
ENSMUSG00000085939.4	MGI:105972	Cd63-ps	CD63 antigen, pseudogene	1.40875	4.95929e-05	0.00221	0.289378	0.414869	0.993554
ENSMUSG00000086006.3	MGI:3649469	Gm13293	predicted gene 13293	1.48953	0.000116388	0.00428456	0.419304	0.295073	0.963432
ENSMUSG00000086150.2	MGI:3041246	Bach2os	BTB and CNC homology 2, opposite strand	4.68574	0.00010274	0.00384646	1.60479	0.218241	0.938869
ENSMUSG00000086564.10	MGI:2685862	Cd101	CD101 antigen	2.482	0.000140046	0.00494067	0.396783	0.611846	0.998274
ENSMUSG00000086915.8	MGI:3840142	Gm16364	predicted gene 16364	3.41569	5.64614e-05	0.00243714	-0.241244	0.786941	0.998747
ENSMUSG00000089661.10	MGI:109615	Mia	melanoma inhibitory activity	2.51235	7.88317e-06	0.000578467	0.627146	0.295753	0.963432
ENSMUSG00000089929.2	MGI:1278326	Bcl2a1b	B cell leukemia/lymphoma 2 related protein A1b	3.09108	3.35394e-09	1.80082e-06	0.561416	0.308769	0.969638
ENSMUSG00000089948.2	MGI:4415003	Far2os1	fatty acyl CoA reductase 2, opposite strand 1	2.30621	1.82835e-06	0.000191664	2.09231	2.00078e-05	0.0133298
ENSMUSG00000090122.4	MGI:1913490	Kcne1l	potassium voltage-gated channel, Isk-related family, member 1-like, pseudogene	3.12238	6.81392e-10	6.00007e-07	1.03152	0.043158	0.695779
ENSMUSG00000090124.8	MGI:3032636	Ugt1a7c	UDP glucuronosyltransferase 1 family, polypeptide A7C	1.46666	0.000143256	0.00503777	0.0790519	0.84087	0.998747
ENSMUSG00000090145.8	MGI:3580629	Ugt1a6b	UDP glucuronosyltransferase 1 family, polypeptide A6B	1.44029	0.00025085	0.0077559	0.0921029	0.819251	0.998747
ENSMUSG00000090215.10	MGI:4821264	Trim34b	tripartite motif-containing 34B	1.92914	2.7792e-05	0.00143618	0.0248658	0.958518	0.998747
ENSMUSG00000090231.11	MGI:105975	Cfb	complement factor B	3.37577	2.85272e-05	0.00146728	1.40854	0.107678	0.866062
ENSMUSG00000090675.3	MGI:2177494	Olfr111	olfactory receptor 111	3.80449	1.47676e-08	5.41824e-06	0.819418	0.435811	0.995605
ENSMUSG00000090894.5	MGI:2177493	Olfr110	olfactory receptor 110	3.82799	1.63302e-05	0.000987621	0.320318	0.776613
ENSMUSG00000091649.4	MGI:3645789	Phf11b	PHD finger protein 11B	3.5613	1.29562e-07	2.5929e-05	0.967561	0.200413	0.932732
ENSMUSG00000092193.2	MGI:3645134	Cd9-ps	Cd9 antigen, pseudogene	3.42751	0.000191889	0.00633321	0.373822	0.680769
ENSMUSG00000092243.9	MGI:3647514	Gm7030	predicted gene 7030	1.71997	0.000105412	0.00393311	0.687208	0.17599	0.914334
ENSMUSG00000092463.2	MGI:5141954	Gm20489	predicted gene 20489	2.34172	9.45575e-05	0.00358871	0.367077	0.578042	0.998274
ENSMUSG00000092511.8	MGI:5142012	Gm20547	predicted gene 20547	2.69237	6.49811e-05	0.00269904	2.03691	0.00612573	0.359047
ENSMUSG00000093938.3	MGI:1890682	Evi2b	ecotropic viral integration site 2b	2.43655	1.58061e-05	0.000963864	-0.0297048	0.961051	0.998747
ENSMUSG00000094724.9	MGI:3702087	Rnaset2b	ribonuclease T2B	1.20506	2.50312e-05	0.00131827	0.0141057	0.960837	0.998747
ENSMUSG00000094796.3	MGI:4840510	BC147527	cDNA sequence BC147527	4.14592	9.68367e-06	0.000687666	1.24563	0.192585	0.928077
ENSMUSG00000095304.10	MGI:2663998	Plac9a	placenta specific 9a	2.39411	1.92359e-05	0.00110276	0.890173	0.114943	0.870117
ENSMUSG00000095457.4	MGI:3704114	Gvin-ps5	GTPase, very large interferon inducible, pseudogene 5	1.73135	1.34211e-05	0.000841804	0.128851	0.751365	0.998747
ENSMUSG00000095649.4	MGI:3703149	Gvin-ps3	GTPase, very large interferon inducible, pseudogene 3	1.58049	8.86361e-05	0.00343527	0.370247	0.379608	0.992465
ENSMUSG00000095687.3	MGI:1915445	Rnaset2a	ribonuclease T2A	1.12732	0.000157378	0.00544735	0.116629	0.697061	0.998747
ENSMUSG00000096727.4	MGI:1346526	Psmb9	proteasome (prosome, macropain) subunit, beta type 9 (large multifunctional peptidase 2)	1.88481	1.93789e-07	3.58494e-05	0.889107	0.0202476	0.56739
ENSMUSG00000097352.8	MGI:3583961	C920009B18Rik	RIKEN cDNA C920009B18 gene	4.56543	2.31934e-05	0.00126069	1.0238	0.456666	0.998258
ENSMUSG00000097415.3	MGI:2142134	AU020206	expressed sequence AU020206	2.30197	5.06431e-08	1.29634e-05	0.666013	0.123109	0.874839
ENSMUSG00000097654.2	MGI:5477208	Gm26714	predicted gene, 26714	3.62422	1.32476e-05	0.000838028	-0.753178	0.626083	0.998274
ENSMUSG00000098112.9	MGI:3611448	Bin2	bridging integrator 2	1.57186	7.95008e-05	0.00314414	0.207379	0.606881	0.998274
ENSMUSG00000099974.2	MGI:1278325	Bcl2a1d	B cell leukemia/lymphoma 2 related protein A1d	3.04301	2.16715e-06	0.000216885	-0.0777489	0.910097	0.998747
ENSMUSG00000100417.3	MGI:5579284	Gm28578	predicted gene 28578	1.37481	0.000224767	0.00714001	1.60255	1.00515e-05	0.0105736
ENSMUSG00000100838.2	MGI:5579800	Gm29094	predicted gene 29094	2.10837	2.45344e-05	0.00131092	0.62447	0.242168	0.952456
ENSMUSG00000102037.2	MGI:102687	Bcl2a1a	B cell leukemia/lymphoma 2 related protein A1a	2.75847	2.1861e-06	0.00021776	0.782287	0.226656	0.945978
ENSMUSG00000103735.2	MGI:5611545	Gm38317	predicted gene, 38317	1.478	5.13929e-05	0.00225371	0.443068	0.265461	0.956985
ENSMUSG00000104494.2	MGI:5610339	Gm37111	predicted gene, 37111	1.37936	2.04352e-05	0.00115349	0.805815	0.0154099	0.529409
ENSMUSG00000104713.5	MGI:2140937	Gbp6	guanylate binding protein 6	1.71964	2.9017e-05	0.00148553	0.675407	0.109257	0.866062
ENSMUSG00000105076.2	MGI:3612704	A930003O13Rik	RIKEN cDNA A930003O13 gene	2.97321	4.40172e-05	0.00203999	-0.633204	0.402517	0.993554
ENSMUSG00000105096.2	MGI:4359647	Gbp10	guanylate-binding protein 10	1.74502	0.000159792	0.00551359	0.520241	0.27944	0.96101
ENSMUSG00000105489.2	MGI:5621447	Gm38562	predicted gene, 38562	0.832737	0.000124846	0.00454274	0.31042	0.138884	0.886171
ENSMUSG00000105504.5	MGI:2429943	Gbp5	guanylate binding protein 5	1.50983	1.1769e-05	0.000764256	0.232939	0.51093	0.998258
ENSMUSG00000105518.2	MGI:5662811	Gm42674	predicted gene 42674	2.4248	2.41515e-05	0.00129993	0.121616	0.842084	0.998747
ENSMUSG00000106379.2	MGI:1925076	Lhfpl3	lipoma HMGIC fusion partner-like 3	1.39619	0.000264785	0.00815241	-0.482013	0.209578	0.935159
ENSMUSG00000107132.2	MGI:3805557	Gm15997	predicted gene 15997	3.11912	0.000123374	0.00450967	-0.312176	0.725793
ENSMUSG00000108175.2	MGI:3704267	Gm16499	predicted gene 16499	1.84719	9.61689e-05	0.00363132	0.741947	0.115552	0.87138
ENSMUSG00000108596.2	MGI:6121583	Gm49368	predicted gene, 49368	1.80337	4.85788e-06	0.000393167	-0.00296107	0.994033	0.999538
ENSMUSG00000109713.2	MGI:5596028	Pvrig	poliovirus receptor related immunoglobulin domain containing	4.80279	1.80041e-05	0.00105156	-1.09827	0.267056	0.957528
ENSMUSG00000110040.2	MGI:6121585	Gm49369	predicted gene, 49369	2.52178	5.84709e-09	2.68162e-06	0.115512	0.789856	0.998747
ENSMUSG00000110235.2	MGI:3644417	Gm5086	predicted gene 5086	1.96571	4.11409e-06	0.000345677	0.269699	0.551402	0.998258
ENSMUSG00000110332.2	MGI:5012120	Gm19935	predicted gene, 19935	1.37855	0.000125553	0.00455105	-0.125071	0.737196	0.998747
ENSMUSG00000110390.2	MGI:5804984	Gm45869	predicted gene 45869	1.10177	2.28705e-05	0.00124931	0.553267	0.0372151	0.678666
ENSMUSG00000112023.2	MGI:102702	Lilr4b	leukocyte immunoglobulin-like receptor, subfamily B, member 4B	3.42949	8.55365e-06	0.000619408	0.734563	0.417576	0.993554
ENSMUSG00000112148.2	MGI:102701	Lilrb4a	leukocyte immunoglobulin-like receptor, subfamily B, member 4A	3.43449	4.81199e-07	6.87865e-05	-0.225157	0.768042	0.998747
ENSMUSG00000112843.2	MGI:5825861	Gm46224	predicted gene, 46224	4.90081	8.65151e-05	0.00336492	1.30232	0.344836
ENSMUSG00000114755.2	MGI:1329003	Galr3	galanin receptor 3	5.57872	0.000196135	0.00643476	-1.32516	0.439154	0.99708
ENSMUSG00000115230.2	MGI:2146144	AU022793	expressed sequence AU022793	3.63538	4.39722e-05	0.00203999	-0.203305	0.817242	0.998747
ENSMUSG00000116114.2	MGI:5595012	Gm35853	predicted gene, 35853	3.58445	0.000194712	0.00640716	0.950477	0.470487
ENSMUSG00000116876.2	MGI:6215195	Gm49721	predicted gene, 49721	1.21929	1.80085e-05	0.00105156	0.00901806	0.974825	0.998747
ENSMUSG00000117613.2	MGI:3780797	Gm2629	predicted gene 2629	1.62859	9.23812e-06	0.000659945	0.359306	0.339876	0.980506
ENSMUSG00000117905.2	MGI:6303033	Gm50230	predicted gene, 50230	1.03517	0.000269763	0.00828251	0.477592	0.100784	0.848868
ENSMUSG00000118531.2	MGI:6388940	Gm53046	predicted gene, 53046	1.72324	0.000295146	0.00890047	0.788337	0.162148	0.904675
ENSMUSG00000118588.2				2.42424	2.41032e-06	0.000234783	0.39342	0.449527	0.998208
ENSMUSG00000118667.1	MGI:2144831	Ahnak2	AHNAK nucleoprotein 2	4.11847	1.02523e-06	0.000124693	0.862054	0.300983	0.966076

## Sheet: EZ_14DN
gene	MGI_ID	GeneSymbol	Description	EZ_14_log2FoldChange	EZ_14_pvalue	EZ_14_padj	PIZ_14_log2FoldChange	PIZ_14_pvalue	PIZ_14_padj
ENSMUSG00000001985.10	MGI:95816	Grik3	glutamate receptor, ionotropic, kainate 3	-0.954606	3.08144e-05	0.00154521	-0.619576	0.00677459	0.369989
ENSMUSG00000022103.11	MGI:1195462	Gfra2	glial cell line derived neurotrophic factor family receptor alpha 2	-0.613341	9.24335e-05	0.00353269	-0.613302	9.90572e-05	0.0395971
ENSMUSG00000025723.13	MGI:1915289	Nmb	neuromedin B	-0.83272	5.95204e-05	0.00252463	0.0270605	0.893604	0.998747
ENSMUSG00000033327.19	MGI:1932137	Tnxb	tenascin XB	-0.913804	0.00015577	0.00540871	-0.600623	0.0128778	0.48248
ENSMUSG00000034648.10	MGI:106038	Lrrn1	leucine rich repeat protein 1, neuronal	-0.600891	2.48835e-05	0.00131827	-0.412654	0.00375844	0.28247
ENSMUSG00000035305.6	MGI:1347520	Ror1	receptor tyrosine kinase-like orphan receptor 1	-1.05888	0.000236344	0.0074115	-0.56778	0.0479477	0.722874
ENSMUSG00000036915.18	MGI:2442334	Kirrel2	kirre like nephrin family adhesion molecule 2	-1.19989	0.000193018	0.00636094	-0.859496	0.00712826	0.371991
ENSMUSG00000046743.7	MGI:3045256	Fat4	FAT atypical cadherin 4	-1.02789	3.10333e-05	0.00154913	-0.82775	0.000788318	0.126147
ENSMUSG00000048424.19	MGI:2444654	Ranbp3l	RAN binding protein 3-like	-1.03634	2.90852e-05	0.00148557	-0.623053	0.0108616	0.446689
ENSMUSG00000055653.14	MGI:104903	Gpc3	glypican 3	-1.70621	0.000197198	0.0064504	-1.82953	5.87979e-05	0.0309262
ENSMUSG00000059203.11	MGI:1913106	Il1rapl2	interleukin 1 receptor accessory protein-like 2	-1.23785	0.000245831	0.00763289	-0.736317	0.0168615	0.538521
ENSMUSG00000061462.19	MGI:2681862	Obscn	obscurin, cytoskeletal calmodulin and titin-interacting RhoGEF	-1.12538	2.27696e-07	3.97012e-05	-0.332586	0.117948	0.874839
ENSMUSG00000070867.5	MGI:3650152	Trabd2b	TraB domain containing 2B	-1.65754	3.65382e-06	0.000320459	-1.24627	0.000348004	0.085871
ENSMUSG00000090863.2	MGI:3704402	A530084C06Rik	RIKEN cDNA A530084C06 gene	-1.73096	3.79435e-05	0.00182377	-1.31282	0.00176889	0.194303
ENSMUSG00000105957.2	MGI:5663391	Gm43254	predicted gene 43254	-0.761707	0.000222882	0.00711331	-0.28873	0.154591	0.901816
ENSMUSG00000118284.2	MGI:5624447	Gm41562	predicted gene, 41562	-1.37439	0.000289516	0.00875467	-0.648492	0.0659292	0.78153

## Sheet: EZ_14<1.5FC
gene	MGI_ID	GeneSymbol	Description	EZ_14_log2FoldChange	EZ_14_pvalue	EZ_14_padj	PIZ_14_log2FoldChange	PIZ_14_pvalue	PIZ_14_padj
ENSMUSG00000002052.7	MGI:107726	Supt6	SPT6, histone chaperone and transcription elongation factor	-0.364085	0.00019931	0.00650016	-0.19851	0.0424059	0.692177
ENSMUSG00000016128.15	MGI:2385331	Stard13	StAR-related lipid transfer (START) domain containing 13	-0.456824	0.000312421	0.00931929	-0.474676	0.000183797	0.0569877
ENSMUSG00000020525.18	MGI:1858214	Ppm1d	protein phosphatase 1D magnesium-dependent, delta isoform	-0.335558	3.76628e-05	0.00181424	-0.178875	0.0294488	0.651802
ENSMUSG00000020929.15	MGI:1336880	Eftud2	elongation factor Tu GTP binding domain containing 2	-0.222812	2.47156e-05	0.00131741	-0.18712	0.000399157	0.08964
ENSMUSG00000022323.12	MGI:1095401	Rida	reactive intermediate imine deaminase A homolog	0.549898	7.94357e-05	0.00314414	0.287417	0.0405578	0.690938
ENSMUSG00000022390.12	MGI:1328310	Zc3h7b	zinc finger CCCH type containing 7B	-0.255851	0.000335018	0.00985974	-0.0530312	0.456279	0.998258
ENSMUSG00000022503.11	MGI:1347073	Nubp1	nucleotide binding protein 1	0.405444	2.82502e-05	0.00145644	0.126361	0.192218	0.927747
ENSMUSG00000024456.17	MGI:1194490	Diaph1	diaphanous related formin 1	-0.485277	0.000154511	0.00538196	-0.309323	0.0157048	0.530345
ENSMUSG00000024642.18	MGI:104633	Tle4	transducin-like enhancer of split 4	0.296131	0.000196108	0.00643476	0.262163	0.000939043	0.13715
ENSMUSG00000024978.12	MGI:109162	Gpam	glycerol-3-phosphate acyltransferase, mitochondrial	0.55548	1.16866e-05	0.000763406	0.169111	0.183099	0.920874
ENSMUSG00000027397.15	MGI:108392	Slc20a1	solute carrier family 20, member 1	0.384658	0.000220955	0.00706992	0.334521	0.00128927	0.162067
ENSMUSG00000027882.19	MGI:107362	Stxbp3	syntaxin binding protein 3	0.522357	6.45225e-07	8.93332e-05	0.254956	0.0163322	0.534892
ENSMUSG00000028389.13	MGI:99181	Zfp37	zinc finger protein 37	-0.389802	8.53751e-07	0.000110848	-0.283675	0.000308022	0.0779297
ENSMUSG00000029103.17	MGI:96829	Lrpap1	low density lipoprotein receptor-related protein associated protein 1	0.439576	2.61136e-06	0.000247737	0.287002	0.00217271	0.223101
ENSMUSG00000031386.15	MGI:105942	Hcfc1	host cell factor C1	-0.231307	0.000126007	0.00455488	-0.0049293	0.934676	0.998747
ENSMUSG00000034854.9	MGI:3604804	Mfsd12	major facilitator superfamily domain containing 12	0.56143	7.07253e-05	0.0028726	0.546065	0.000112009	0.0422402
ENSMUSG00000035805.14	MGI:2157910	Mlc1	megalencephalic leukoencephalopathy with subcortical cysts 1 homolog (human)	0.476725	0.000156525	0.00542636	0.0309224	0.806517	0.998747
ENSMUSG00000036686.17	MGI:2384831	Cc2d1a	coiled-coil and C2 domain containing 1A	-0.358739	5.30309e-05	0.00230716	-0.00971487	0.912216	0.998747
ENSMUSG00000037031.11	MGI:1917673	Tspan15	tetraspanin 15	0.529704	0.000234916	0.00738117	0.259477	0.0730044	0.797126
ENSMUSG00000039477.17	MGI:3648294	Tnrc18	trinucleotide repeat containing 18	-0.263174	0.000125694	0.00455105	0.0809558	0.237554	0.952456
ENSMUSG00000039835.17	MGI:106390	Nhsl1	NHS-like 1	-0.372699	9.86582e-06	0.000693886	-0.0378179	0.652907	0.998274
ENSMUSG00000040006.14	MGI:2384905	Ginm1	glycoprotein integral membrane 1	0.553928	4.61519e-05	0.00209051	-0.0877383	0.520644	0.998258
ENSMUSG00000040631.9	MGI:2148865	Dok4	docking protein 4	-0.464781	0.000125305	0.00455105	-0.0501528	0.674698	0.998747
ENSMUSG00000047238.5	MGI:1922875	Mageh1	MAGE family member H1	-0.392551	9.2553e-09	3.77308e-06	-0.287215	1.7307e-05	0.0128117
ENSMUSG00000058444.9	MGI:1346345	Map2k5	mitogen-activated protein kinase kinase 5	-0.289105	8.904e-05	0.00344486	-0.0677899	0.352407	0.983052
ENSMUSG00000059005.14	MGI:1917171	Hnrnpa3	heterogeneous nuclear ribonucleoprotein A3	-0.24982	1.38604e-05	0.000862105	-0.245607	1.90839e-05	0.0131527
ENSMUSG00000067279.4	MGI:1858229	Ppp1r3c	protein phosphatase 1, regulatory subunit 3C	0.552117	4.60916e-05	0.00209051	0.191455	0.158483	0.90298

## Sheet: PIZ_14Up
gene	MGI_ID	GeneSymbol	Description	EZ_14_log2FoldChange	EZ_14_pvalue	EZ_14_padj	PIZ_14_log2FoldChange	PIZ_14_pvalue	PIZ_14_padj
ENSMUSG00000023046.7	MGI:96441	Igfbp6	insulin-like growth factor binding protein 6	0.7079	0.0455329	0.26477	1.7012	1.43664e-06	0.00358927
ENSMUSG00000035551.7	MGI:1933198	Igfbpl1	insulin-like growth factor binding protein-like 1	0.790556	0.0120116	0.123914	1.901	1.78003e-09	8.89437e-06
ENSMUSG00000041417.16	MGI:97583	Pik3r1	phosphoinositide-3-kinase regulatory subunit 1	0.299677	0.0210038	0.174102	0.605478	3.07427e-06	0.00614454
ENSMUSG00000063632.7	MGI:98359	Sox11	SRY (sex determining region Y)-box 11	0.547195	0.0211488	0.174566	1.22194	2.56606e-07	0.000732683
ENSMUSG00000064080.13	MGI:95488	Fbln2	fibulin 2	0.932921	0.00196581	0.0370826	1.37401	4.63398e-06	0.00681668
ENSMUSG00000074570.15	MGI:2444482	Cass4	Cas scaffolding protein family member 4	0.405428	0.230038	0.564945	1.90467	2.46525e-07	0.000732683

## Sheet: PIZ_14Up_v_EZ_14Up
gene	MGI_ID	GeneSymbol	Description	EZ_14_log2FoldChange	EZ_14_pvalue	EZ_14_padj	PIZ_14_log2FoldChange	PIZ_14_pvalue	PIZ_14_padj
ENSMUSG00000023232.18	MGI:1919132	Serinc2	serine incorporator 2	1.12015	1.29073e-06	0.000146932	1.44505	4.90613e-10	3.26863e-06
ENSMUSG00000025572.19	MGI:1098686	Tmc6	transmembrane channel-like gene family 6	1.07167	1.03738e-05	0.00071081	1.63404	1.72364e-11	1.72252e-07
ENSMUSG00000030256.12	MGI:1930704	Bhlhe41	basic helix-loop-helix family, member e41	0.686607	9.32544e-05	0.00355173	0.832453	2.22134e-06	0.00493309

## Sheet: PIZ_14DN
gene	MGI_ID	GeneSymbol	Description	EZ_14_log2FoldChange	EZ_14_pvalue	EZ_14_padj	PIZ_14_log2FoldChange	PIZ_14_pvalue	PIZ_14_padj
ENSMUSG00000020566.20	MGI:1916025	Atp6v1c2	ATPase, H+ transporting, lysosomal V1 subunit C2	-1.40748	0.00318974	0.052638	-2.14376	4.14134e-06	0.00681668
ENSMUSG00000022863.16	MGI:109532	Btg3	BTG anti-proliferation factor 3	-0.320158	0.000995949	0.0222361	-0.715427	7.60953e-13	1.52092e-08
ENSMUSG00000045053.3	MGI:2663923	Kcng3	potassium voltage-gated channel, subfamily G, member 3	-1.57128	0.00116986	0.0249101	-2.18909	4.77478e-06	0.00681668

## Sheet: PIZ_14DN_v_EZ_14DN
gene	MGI_ID	GeneSymbol	Description	EZ_14_log2FoldChange	EZ_14_pvalue	EZ_14_padj	PIZ_14_log2FoldChange	PIZ_14_pvalue	PIZ_14_padj
ENSMUSG00000021390.7	MGI:109278	Ogn	osteoglycin	-1.42582	0.000130367	0.00468122	-1.67931	4.73919e-06	0.00681668
ENSMUSG00000049929.8	MGI:1925384	Lpar4	lysophosphatidic acid receptor 4	-0.833561	2.03135e-05	0.00114957	-0.883666	5.74309e-06	0.00765247
ENSMUSG00000051000.18	MGI:2444746	Fam160a1	family with sequence similarity 160, member A1	-1.36244	7.9355e-05	0.00314414	-1.86495	8.09233e-08	0.000323483
