# Supplementary material for: Transcriptome Profiling of the Hippocampal Seizure Network Implicates a Role for Wnt Signaling during Epileptogenesis in a Mouse Model of Temporal Lobe Epilepsy
Source: Int J Mol Sci. 2022 Oct 10;23(19):12030. doi: 10.3390/ijms231912030 (PMC9569502; doi:10.3390/ijms231912030)
Supplement: Supplementary file 1 [file ijms-23-12030-s001.zip › Supplementary Table S6.xlsx]

## Sheet: Sheet1
			EZ 3d		EZ 7d		EZ 14d		PIZ 3d		PIZ 7d		PIZ 14d
Gene name	Ensembl ID	Gene description	Log2FC	p-adj	Log2FC	p-adj	Log2FC	p-adj	Log2FC	p-adj	Log2FC	p-adj	Log2FC	p-adj
APC	ENSMUSG00000005871.16	APC, WNT signaling pathway regulator	-0.428689	0.0109154	-0.540454	0.000781377	0.0536434	0.888716	-0.223181	0.279046	0.0761755	0.864503	0.112423	0.99708
Axin 1	ENSMUSG00000024182	axin 1	-0.0115387	0.933082	0.143047	0.167031	-0.0438685	0.831282	0.017443	0.91479	0.021074	0.94135	0.133743	0.874839
Axin 2	ENSMUSG00000000142	axin 2	-0.269493	0.0516543	-0.420411	0.00114024	-0.321812	0.0778773	0.0537983	0.79479	-0.0957846	0.753785	-0.107446	0.984284
beta-catenin (ctnnb1)	ENSMUSG00000006932	catenin (cadherin associated protein), beta 1	0.294229	0.00167179	0.386021	1.76251e-05	0.115764	0.488152	-0.00743595	0.965433	0.0763166	0.71757	-0.0561971	0.998258
Btrc	ENSMUSG00000025217.16	beta-transducin repeat containing protein	-0.506298	3.40463e-06	-0.647305	1.14206e-09	-0.180296	0.324382	-0.322055	0.00802196	-0.166035	0.411548	-0.0506828	0.998274
CaMKII-alpha	ENSMUSG00000024617	calcium/calmodulin-dependent protein kinase II alpha	-1.49667	3.49185e-07	-1.17674	5.3877e-05	-0.558139	0.234298	-0.652955	0.0592894	-0.463688	0.394032	-0.195964	0.998258
c-jun	ENSMUSG00000052684	jun proto-oncogene	0.193713	0.513498	-0.118284	0.697513	-0.17426	0.714196	-0.0268853	0.950482	0.0264379	0.973842	0.0299365	0.998747
c-myc	ENSMUSG00000022346	myelocytomatosis oncogene	1.57767	1.76039e-07	1.45476	1.00702e-06	0.832718	0.0504138	0.699946	0.0541103	0.201583	0.799166	0.0374098	0.998747
Csnk1a1 (CK1alfa)	ENSMUSG00000024576.15	casein kinase 1, alpha 1	-0.372173	7.98935e-05	-0.514347	1.79443e-08	-0.115933	0.499584	-0.372184	0.00021234	-0.139336	0.428523	-0.041805	0.998274
CCND1	ENSMUSG00000070348.6	CCND1, cyclin D1	2.24293	2.29932e-09	2.13591	6.8413e-09	0.847561	0.133963	0.838363	0.0594725	0.217241	0.824412	-0.185475	0.998274
Dkk3	ENSMUSG00000030772.7	dickkopf WNT signaling pathway inhibitor 3	-1.47178	1.24594e-11	-0.809316	0.000203562	-0.0183855	0.974396	-0.487251	0.0582213	-0.218858	0.646191	0.277526	0.904675
DVL1	ENSMUSG00000029071.17	dishevelled segment polarity protein 1	0.158552	0.0500709	-0.0643865	0.478486	0.0164431	0.929749	0.119595	0.201373	0.0999203	0.495598	0.24186	0.0875079
DVL2	ENSMUSG00000020888	dishevelled segment polarity protein 2	-0.415241	0.0535155	-0.431332	0.038598	-0.109888	0.793489	0.00578138	0.988711	0.0199131	0.976811	0.130647	0.998258
FOSL1	ENSMUSG00000024912	Fos-like antigen 1, AP-1 Transcription Factor Subunit	5.32673	3.06639e-07	6.72293	2.35041e-06	1.84564	0.38124	3.4077	0.0154056	2.89707	0.293639	1.64189	0.958865
Frizzled1	ENSMUSG00000044674.7	frizzled class receptor 1	1.58114	3.38034e-08	1.74163	5.14213e-10	0.39928	0.443882	0.255353	0.536012	0.400716	0.477732	-0.292595	0.957879
Frizzled6	ENSMUSG00000022297.16	frizzled class receptor 6	0.626538	0.00262172	1.21713	8.23615e-10	0.163376	0.689803	0.444781	0.0669709	0.438889	0.201623	-0.103225	0.998274
Frizzled7	ENSMUSG00000041075.9	frizzled class receptor 7	1.16906	8.71274e-06	1.23794	1.79528e-06	0.532682	0.210234	0.663032	0.0290015	0.239447	0.693928	0.311128	0.931974
Frizzled8	ENSMUSG00000036904.7	frizzled class receptor 8	0.617289	0.00932707	0.998056	1.05009e-05	-0.13621	0.78168	0.300535	0.321423	-0.0508168	0.943763	-0.0466378	0.998747
FRP (FRZB)	ENSMUSG00000027004.4	secreted frizzled related protein 3, frizzled-related protein b, FRZB	-1.12222	0.0108594	-0.287687	0.582009	0.0787036	0.941525	-1.13021	0.0174878	-0.616671	0.433925	-1.13749	0.248568
GSK-3beta	ENSMUSG00000022812	glycogen synthase kinase 3 beta	-0.550436	4.90571e-06	-0.615252	1.7569e-07	-0.152937	0.487561	-0.340899	0.0118162	-0.140899	0.569177	-0.084086	0.99708
JNK	ENSMUSG00000021936.15	jun N-terminal kinase, MAPK8	-0.814804	1.35035e-06	-0.984223	2.19444e-09	-0.173564	0.589763	-0.551058	0.00300658	-0.103002	0.810867	-0.162218	0.961307
LEF1	ENSMUSG00000027985.15	lymphoid enhancer binding factor 1	0.649162	0.00835459	0.866048	0.000236106	0.103053	0.846054	0.0833766	0.830161	0.267683	0.599249	0.258141	0.952456
LGR4	ENSMUSG00000050199	leucine-rich repeat-containing G protein-coupled receptor 4	-0.289027	0.0114713	-0.354712	0.00130545	-0.218611	0.203987	-0.468848	5.79601e-05	-0.427248	0.00270177	-0.312695	0.18736
LGR5	ENSMUSG00000020140	leucine rich repeat containing G protein coupled receptor 5	0.0380978	0.966257	-0.462868	0.560135	-0.485472	0.696322	-1.44643	0.0426192	0.506039	0.720605	-0.680616	0.935159
LGR6	ENSMUSG00000042793	leucine-rich repeat-containing G protein-coupled receptor 6	0.381649	0.375675	-0.0515495	0.919617	-0.742512	0.193703	-0.0328201	0.960226	-0.335496	0.675444	-0.386382	0.952456
LRP5	ENSMUSG00000024913.17	low density lipoprotein receptor-related protein 5	1.04913	0.000220381	2.11986	7.80278e-15	0.692024	0.0888129	0.738754	0.0219202	0.444087	0.399115	0.175663	0.998258
LRP6	ENSMUSG00000030201.16	low density lipoprotein receptor-related protein 6	-0.0163379	0.906296	0.234773	0.0165846	0.00256619	0.99332	-0.0969625	0.457342	-0.11376	0.560184	-0.00482023	0.998747
Nfat5	ENSMUSG00000003847.17	nuclear factor of activated T cells 5	-0.282457	0.0191005	-0.351778	0.00224911	-0.0997896	0.656232	-0.010501	0.960506	-0.0341688	0.918339	-0.0554855	0.998274
Nfatc1	ENSMUSG00000033016.17	nuclear factor of activated T cells, cytoplasmic, calcineurin dependent 1	1.32298	2.89809e-06	2.20347	1.18959e-15	0.912173	0.012526	1.11553	0.000312531	0.484019	0.354463	-0.0208146	0.998747
Nfatc2	ENSMUSG00000027544.17	nuclear factor of activated T cells, cytoplasmic, calcineurin dependent 2	0.216453	0.462608	0.629949	0.00898639	0.395147	0.323386	-0.0499425	0.903632	-0.161811	0.783552	-0.0892832	0.998747
Nfatc3	ENSMUSG00000031902.11	nuclear factor of activated T cells, cytoplasmic, calcineurin dependent 3	0.497579	0.00306532	0.765161	1.61782e-06	0.141361	0.664869	0.140428	0.549591	0.0962049	0.822418	-0.0923287	0.998258
Nfatc4	ENSMUSG00000023411.13	nuclear factor of activated T cells, cytoplasmic, calcineurin dependent 4	1.43896	0.000125426	1.1715	0.00141766	0.23879	0.764745	0.336347	0.520324	0.628623	0.374169	0.0760257	0.998747
Prkca	ENSMUSG00000050965.15	PKC protein kinase C, alpha	-1.28147	4.84606e-11	-1.33157	2.57213e-12	-0.0863568	0.842647	-0.522685	0.0192316	-0.296392	0.420282	-0.162809	0.986811
Porcn	ENSMUSG00000031169	porcupine O-acyltransferase	-0.046811	0.840952	-0.597445	0.000195301	-0.143756	0.649116	-0.129818	0.575962	-0.0250605	0.960686	-0.0901451	0.998258
PPARdelta	ENSMUSG00000002250.17	peroxisome proliferator activator receptor delta	0.8246	6.94891e-06	1.19467	1.88913e-11	0.437329	0.105274	0.64201	0.00150511	0.253811	0.480455	0.196209	0.952456
Prickle2	ENSMUSG00000030020.14	prickle planar cell polarity protein 2	-0.88817	2.50946e-06	-0.749967	5.88859e-05	-0.200874	0.574504	-0.525989	0.0135145	-0.354144	0.278784	-0.0502356	0.998747
Prickle3	ENSMUSG00000031145.16	prickle planar cell polarity protein 3	0.995297	0.00634883	1.33941	4.65742e-05	-0.0371816	0.967508	0.208059	0.706854	0.286984	0.735541	0.333341	0.96648
Rac1	ENSMUSG00000001847.15	Rac family small GTPase 1	-0.0537626	0.425389	0.0876558	0.14584	0.0145668	0.913986	-0.184791	0.00214535	-0.155013	0.0559036	-0.110246	0.627452
RhoA	ENSMUSG00000007815	ras homolog family member A	0.738565	1.73415e-07	0.938293	9.48724e-12	0.305147	0.159974	0.403475	0.0117882	0.0654491	0.869059	0.0298782	0.998747
RNF43	ENSMUSG00000034177	ring finger protein 43	0.862856	0.000934158	0.741866	0.00449717	0.500557	0.243066	0.47136	0.134559	0.237354	0.710553	0.195232	0.997308
ROR1	ENSMUSG00000035305.6	receptor tyrosine kinase-like orphan receptor 1	-1.45801	8.06027e-06	-0.985418	0.00227912	-1.05888	0.0074115	-1.44515	2.36582e-05	-0.722927	0.153338	-0.56778	0.722874
ROR2	ENSMUSG00000021464.16	receptor tyrosine kinase-like orphan receptor 2	2.20172	0.00114185	1.91748	0.00707593	-0.782935	0.555487	-0.00285019	0.998523	0.476538	0.765756	-0.238625	0.998747
RSPO1	ENSMUSG00000028871	R-spondin 1	0.279055	0.634299	1.04494	0.0271866	0.18684	0.852197	0.730408	0.187522	-0.120655	0.9292	-0.768092	0.81633
RSPO2	ENSMUSG00000051920	R-Spondin 2	-0.278913	0.716493	-1.35204	0.0207379	-0.15492	0.909417	0.153342	0.869304	0.472983	0.711568	-0.142365	0.998747
RSPO3	ENSMUSG00000019880.11	R-Spondin 3	0.0266833	0.966177	-1.05038	0.0212466	0.164021	0.86991	-0.02345	0.977874	0.643402	0.429823	0.180648	0.998274
RYK	ENSMUSG00000032547.13	receptor-like tyrosine kinase	0.2584	0.0110417	0.305421	0.00199204	0.0957053	0.615028	0.236772	0.0366218	0.0510274	0.84742	0.208295	0.568096
sFRP1	ENSMUSG00000031548	secreted frizzled-related protein 1	1.12212	0.0219202	2.85013	2.50387e-10	1.50161	0.0106339	0.739297	0.203417	0.516875	0.602688	0.34766	0.993554
sFRP5	ENSMUSG00000018822	secreted frizzled-related sequence protein 5	2.64807	0.0825602	7.92878	3.65974e-07	5.65064	0.00376094	3.75042	0.0378108	3.0588	0.261538	3.41326	0.621334
TCF4	ENSMUSG00000053477.19	transcription factor 4	-0.229935	0.0268137	-0.449959	2.65991e-06	-0.116419	0.517981	0.00226385	0.991061	-0.0659744	0.783256	0.0424657	0.998274
Vangl1	ENSMUSG00000027860.16	VANGL planar cell polarity 1	0.818221	2.3564e-05	0.79751	5.51926e-05	0.0954256	0.83488	0.517818	0.0233599	0.367739	0.319489	0.0674189	0.998747
Wif-1	ENSMUSG00000020218.12	WIF1, Wnt inhibitory factor 1	-1.50469	0.00213318	-1.54473	0.00319721	-0.499325	0.548759	-0.160703	0.811573	0.67291	0.398217	-0.273725	0.998258
Wnt11	ENSMUSG00000015957.13	wingless-type MMTV integration site family, member 11	-1.0246	0.286828	-2.53667	0.00287051	-0.467949	0.777612	-1.24499	0.221719	-0.683361	0.705475	-0.79149	0.957879
Wnt5a	ENSMUSG00000021994.16	wingless-type MMTV integration site family, member 5A	-0.217095	0.423131	0.285859	0.250619	-0.128138	0.783626	-0.142881	0.661832	0.272892	0.536553	-0.0361992	0.998747
wnt5b	ENSMUSG00000030170.15	wingless-type MMTV integration site family, member 5B	1.26652	0.000523308	1.40537	7.00719e-05	0.61888	0.312561	-0.0169693	0.980933	0.432236	0.579362	-0.186509	0.998258
ZNRF3	ENSMUSG00000041961.15	zinc and ring finger 3	-0.116598	0.354042	-0.166749	0.151756	-0.0944096	0.647323	-0.134836	0.328401	-0.206069	0.257497	0.0400654	0.998747
Abbreviations: Log2FC, log-2 fold change; p-adj, p-adjusted; EZ, epileptogenic zone; PIZ, peri-ictal zone.
Fold change >1.5
Fold Change <-1.5
p < 0.01
